# Supplementary material for: Deciphering the actin structure-dependent preferential cooperative binding of cofilin
Source: eLife. 2024 Aug 2;13:RP95257. doi: 10.7554/eLife.95257 (PMC11296705; doi:10.7554/eLife.95257)
Supplement: Figure 1—source data 1. — These data are presented as origin plots in Figure 1A and Figure 1—figure supplement 1. [file elife-95257-fig1-data1.xlsx]

## Sheet: Figure 1A
Figure 1A	1ATN_A	PC1	-22.3897	PC2	-34.2326
	1J6Z_A	PC1	-17.7572	PC2	-46.2857
	2BTF_A	PC1	-25.5624	PC2	-19.5086
	2ZWH_A	PC1	14.7124	PC2	9.10569
	3DAW_A	PC1	-9.01361	PC2	-47.5632
	3HBT_A	PC1	-17.9209	PC2	-40.8124
	3J0S_A	PC1	11.4975	PC2	-50.6492
	3J0S_B	PC1	11.4988	PC2	-50.65
	3J0S_C	PC1	11.4999	PC2	-50.6508
	3J0S_D	PC1	11.4989	PC2	-50.6504
	3J0S_E	PC1	11.4979	PC2	-50.6495
	3J0S_F	PC1	11.4978	PC2	-50.6494
	3J0S_G	PC1	11.4988	PC2	-50.6499
	3J0S_H	PC1	11.4976	PC2	-50.6505
	3J0S_I	PC1	11.4986	PC2	-50.6505
	3J0S_J	PC1	11.4992	PC2	-50.6497
	3J0S_K	PC1	11.4985	PC2	-50.649
	3J0S_L	PC1	11.4998	PC2	-50.6495
	3J8I_D	PC1	7.03908	PC2	9.98097
	3J8I_E	PC1	7.02191	PC2	10.0022
	3J8I_F	PC1	7.03008	PC2	10.0183
	3J8I_G	PC1	7.0376	PC2	10.0054
	3J8I_H	PC1	7.02633	PC2	10.0064
	3J8J_A	PC1	-106.374	PC2	-0.35958
	3J8J_B	PC1	-106.374	PC2	-0.36022
	3J8J_C	PC1	-106.374	PC2	-0.35887
	3J8J_D	PC1	-106.375	PC2	-0.36053
	3J8J_E	PC1	-106.374	PC2	-0.35992
	3J8J_F	PC1	-106.375	PC2	-0.35911
	3J8J_G	PC1	-106.375	PC2	-0.36023
	3J8J_H	PC1	-106.375	PC2	-0.36041
	3J8J_I	PC1	-106.375	PC2	-0.35941
	3J8J_J	PC1	-106.374	PC2	-0.35967
	3J8J_K	PC1	-106.374	PC2	-0.36083
	3J8K_A	PC1	-40.8705	PC2	4.37519
	3J8K_B	PC1	-45.4766	PC2	11.6391
	3J8K_C	PC1	-42.1833	PC2	13.7004
	3J8K_D	PC1	-52.6744	PC2	13.2422
	3J8K_E	PC1	-45.5239	PC2	12.3565
	3J8K_F	PC1	-49.8856	PC2	11.1729
	3J8K_G	PC1	-54.5513	PC2	11.5108
	3J8K_H	PC1	-63.4807	PC2	11.236
	3J8K_I	PC1	-22.0198	PC2	23.2376
	3J8K_J	PC1	-2.19415	PC2	7.50064
	3MFP_A	PC1	14.6377	PC2	-1.40969
	4A7N_A	PC1	1.36121	PC2	7.44524
	4A7N_B	PC1	1.36085	PC2	7.44523
	4A7N_C	PC1	1.36139	PC2	7.44444
	4A7N_D	PC1	1.36125	PC2	7.44504
	4A7N_E	PC1	1.36213	PC2	7.4449
	5ONV_A	PC1	6.5289	PC2	8.04112
	5ONV_B	PC1	6.52853	PC2	8.04134
	5ONV_C	PC1	6.52938	PC2	8.04157
	5ONV_D	PC1	6.52999	PC2	8.04105
	5ONV_E	PC1	6.52844	PC2	8.04146
	5OOC_A	PC1	11.5823	PC2	8.69175
	5OOC_B	PC1	11.5824	PC2	8.69212
	5OOC_C	PC1	11.5826	PC2	8.69243
	5OOC_D	PC1	11.5822	PC2	8.69263
	5OOC_E	PC1	11.5823	PC2	8.69234
	5OOD_A	PC1	11.7784	PC2	9.90754
	5OOD_B	PC1	11.7785	PC2	9.90775
	5OOD_C	PC1	11.7798	PC2	9.90741
	5OOD_D	PC1	11.7786	PC2	9.90753
	5OOD_E	PC1	11.779	PC2	9.90779
	5OOE_A	PC1	7.7734	PC2	7.86611
	5OOE_B	PC1	7.77357	PC2	7.86543
	5OOE_C	PC1	7.77331	PC2	7.86625
	5OOE_D	PC1	7.7734	PC2	7.86589
	5OOE_E	PC1	7.77342	PC2	7.86531
	5OOF_A	PC1	10.7194	PC2	8.79665
	5OOF_B	PC1	10.7191	PC2	8.79603
	5OOF_C	PC1	10.7191	PC2	8.79627
	5OOF_D	PC1	10.7196	PC2	8.79622
	5OOF_E	PC1	10.7187	PC2	8.79633
	5YU8_A	PC1	7.55728	PC2	-45.401
	5YU8_B	PC1	7.55741	PC2	-45.4006
	5YU8_C	PC1	7.55756	PC2	-45.4012
	5YU8_D	PC1	7.55737	PC2	-45.4008
	5YU8_E	PC1	7.55743	PC2	-45.4015
	6BNO_A	PC1	8.07718	PC2	8.54757
	6BNO_B	PC1	8.06122	PC2	7.63136
	6BNO_C	PC1	9.17903	PC2	7.37419
	6BNO_D	PC1	9.03588	PC2	7.63945
	6BNO_E	PC1	7.98592	PC2	8.11472
	6BNO_F	PC1	8.15479	PC2	9.63949
	6BNO_G	PC1	6.9714	PC2	8.28725
	6BNO_H	PC1	6.46705	PC2	7.22793
	6BNU_A	PC1	7.99044	PC2	8.0576
	6BNU_B	PC1	7.99127	PC2	8.05683
	6BNU_C	PC1	7.99239	PC2	8.05702
	6BNU_D	PC1	7.9924	PC2	8.05674
	6BNU_E	PC1	7.99221	PC2	8.05669
	6BNU_F	PC1	7.9929	PC2	8.05667
	6BNU_G	PC1	7.99212	PC2	8.05696
	6BNU_H	PC1	7.99235	PC2	8.05652
	6DJM_A	PC1	7.9712	PC2	7.87283
	6DJM_B	PC1	7.96962	PC2	7.87287
	6DJM_C	PC1	7.97074	PC2	7.87386
	6DJM_D	PC1	7.97131	PC2	7.87336
	6DJN_A	PC1	8.20179	PC2	9.05058
	6DJN_B	PC1	8.20247	PC2	9.05015
	6DJN_C	PC1	8.2009	PC2	9.05014
	6DJN_D	PC1	8.20143	PC2	9.05038
	6DJO_A	PC1	8.83178	PC2	5.34303
	6DJO_B	PC1	8.8313	PC2	5.34158
	6DJO_C	PC1	8.8317	PC2	5.34136
	6DJO_D	PC1	8.83083	PC2	5.34465
	6FHL_A	PC1	6.6822	PC2	8.79849
	6FHL_B	PC1	6.68231	PC2	8.79802
	6FHL_C	PC1	6.6813	PC2	8.79836
	6FHL_D	PC1	6.68151	PC2	8.79869
	6FHL_E	PC1	6.6814	PC2	8.79883
	6KLL_A	PC1	8.26221	PC2	8.69365
	6KLL_B	PC1	8.26243	PC2	8.69361
	6KLL_C	PC1	8.26394	PC2	8.69403
	6KLL_D	PC1	8.2628	PC2	8.6938
	6KLN_A	PC1	8.22489	PC2	8.71946
	6KLN_B	PC1	8.22476	PC2	8.71962
	6KLN_C	PC1	8.22444	PC2	8.7197
	6KLN_D	PC1	8.22508	PC2	8.7196
	6UBY_A	PC1	7.69283	PC2	9.92914
	6UBY_B	PC1	7.69295	PC2	9.92876
	6UBY_C	PC1	7.69233	PC2	9.92888
	6UBY_D	PC1	7.69289	PC2	9.92931
	6UBY_E	PC1	7.69262	PC2	9.92983
	6UBY_F	PC1	7.69426	PC2	9.92927
	6UBY_G	PC1	2.22861	PC2	-24.5893
	6UC0_A	PC1	7.69228	PC2	9.92981
	6UC0_B	PC1	7.69276	PC2	9.92913
	6UC0_C	PC1	7.69288	PC2	9.92919
	6UC0_D	PC1	7.69265	PC2	9.92908
	6UC0_E	PC1	7.6931	PC2	9.92948
	6UC0_F	PC1	7.69285	PC2	9.92893
	6UC0_G	PC1	7.69347	PC2	9.92905
	6UC4_A	PC1	7.69301	PC2	9.92943
	6UC4_B	PC1	7.69288	PC2	9.92857
	6UC4_C	PC1	7.69273	PC2	9.92918
	6UC4_D	PC1	5.95879	PC2	-43.2963
	6UC4_F	PC1	-0.08513	PC2	-30.461
	6UC4_E	PC1	3.29415	PC2	-25.0786
	6UC4_J	PC1	5.96005	PC2	-43.2957
	6UC4_K	PC1	5.95879	PC2	-43.2955
	6UC4_L	PC1	5.95912	PC2	-43.2965
	6VAO_D	PC1	5.95865	PC2	-43.296
	6VAO_A	PC1	5.95872	PC2	-43.2956
	6VAO_B	PC1	5.95828	PC2	-43.2962
	6VAO_C	PC1	5.95811	PC2	-43.2961
	6VAO_E	PC1	5.95962	PC2	-43.2959
	6VAU_B	PC1	7.69284	PC2	9.92928
	6VAU_A	PC1	7.69246	PC2	9.92959
	6VAU_C	PC1	7.69351	PC2	9.92991
	6VAU_D	PC1	7.69226	PC2	9.92944
	6VAU_E	PC1	7.69212	PC2	9.9292
	7Q8B_A	PC1	7.92369	PC2	11.2913
	7Q8B_B	PC1	7.92405	PC2	11.2909
	7Q8B_C	PC1	7.92427	PC2	11.2917
	7Q8B_D	PC1	7.92485	PC2	11.2909
	7Q8B_E	PC1	7.92404	PC2	11.2907
	7Q8C_A	PC1	7.08963	PC2	10.7245
	7Q8C_B	PC1	7.08971	PC2	10.7241
	7Q8C_C	PC1	7.08971	PC2	10.7243
	7Q8C_D	PC1	7.08909	PC2	10.7243
	7Q8C_E	PC1	7.08978	PC2	10.7243
	7Q8S_A	PC1	3.57288	PC2	-45.5524
	7Q8S_C	PC1	3.5721	PC2	-45.5517
	7Q8S_D	PC1	3.57225	PC2	-45.5523
	7Q8S_E	PC1	3.57285	PC2	-45.5524
	7Q8S_F	PC1	3.57246	PC2	-45.5517
	8A2R_C	PC1	10.2918	PC2	9.99704
	8A2R_A	PC1	10.2909	PC2	9.99672
	8A2R_B	PC1	10.2915	PC2	9.99732
	8A2R_D	PC1	10.2909	PC2	9.99711
	8A2R_E	PC1	10.2912	PC2	9.99748
	8A2S_C	PC1	8.77285	PC2	10.1202
	8A2S_A	PC1	8.77293	PC2	10.1207
	8A2S_B	PC1	8.77098	PC2	10.1206
	8A2S_D	PC1	8.77229	PC2	10.1206
	8A2S_E	PC1	8.77148	PC2	10.12
	8A2T_C	PC1	8.3631	PC2	9.77489
	8A2T_A	PC1	8.36259	PC2	9.77449
	8A2T_B	PC1	8.36292	PC2	9.77471
	8A2T_D	PC1	8.36336	PC2	9.7742
	8A2T_E	PC1	8.36351	PC2	9.77434
	8A2U_C	PC1	9.12889	PC2	8.97478
	8A2U_A	PC1	9.12828	PC2	8.97474
	8A2U_B	PC1	9.12847	PC2	8.97563
	8A2U_D	PC1	9.12917	PC2	8.97498
	8A2U_E	PC1	9.12913	PC2	8.97506
	8A2Y_C	PC1	8.50438	PC2	10.3238
	8A2Y_A	PC1	8.50424	PC2	10.3239
	8A2Y_B	PC1	8.50441	PC2	10.3239
	8A2Y_D	PC1	8.50488	PC2	10.3244
	8A2Y_E	PC1	8.50353	PC2	10.324
	8A2Z_C	PC1	8.83858	PC2	10.5995
	8A2Z_A	PC1	8.83836	PC2	10.5987
	8A2Z_B	PC1	8.83876	PC2	10.5988
	8A2Z_D	PC1	8.83954	PC2	10.599
	8A2Z_E	PC1	8.83936	PC2	10.5987
	8D13_A	PC1	8.44571	PC2	10.3598
	8D13_B	PC1	8.43758	PC2	10.3483
	8D13_C	PC1	8.43124	PC2	10.3621
	8D14_A	PC1	7.60607	PC2	10.4906
	8D14_B	PC1	7.61958	PC2	10.496
	8D14_C	PC1	7.60695	PC2	10.4859
	8D15_A	PC1	10.2643	PC2	10.6386
	8D15_B	PC1	8.02321	PC2	10.2927
	8D15_C	PC1	7.47829	PC2	9.17845
	8D15_D	PC1	8.99769	PC2	10.4011
	8D15_E	PC1	5.29443	PC2	8.87671
	8D15_F	PC1	10.775	PC2	9.7174
	8D15_G	PC1	3.77437	PC2	8.12721
	8D16_A	PC1	9.27584	PC2	11.3243
	8D16_B	PC1	6.87312	PC2	9.67444
	8D16_C	PC1	8.47374	PC2	9.87311
	8D16_D	PC1	7.83665	PC2	9.00724
	8D16_E	PC1	5.69474	PC2	9.95389
	8D16_F	PC1	9.10157	PC2	9.13552
	8D16_G	PC1	3.83423	PC2	9.12674
	8D17_A	PC1	11.0677	PC2	11.3305
	8D17_B	PC1	10.9632	PC2	10.525
	8D17_C	PC1	8.61059	PC2	10.4889
	8D17_D	PC1	9.6613	PC2	10.4169
	8D17_E	PC1	7.87365	PC2	9.90556
	8D17_F	PC1	9.27443	PC2	10.4397
	8D17_G	PC1	7.64419	PC2	9.26184
	8D18_A	PC1	10.5145	PC2	11.1166
	8D18_B	PC1	9.90543	PC2	10.5638
	8D18_C	PC1	8.21672	PC2	10.2646
	8D18_D	PC1	10.4507	PC2	10.3487
	8D18_E	PC1	7.31036	PC2	10.5516
	8D18_F	PC1	9.13817	PC2	10.6972
	8D18_G	PC1	7.86683	PC2	10.3458
