# Supplementary material for: Deciphering the actin structure-dependent preferential cooperative binding of cofilin
Source: eLife. 2024 Aug 2;13:RP95257. doi: 10.7554/eLife.95257 (PMC11296705; doi:10.7554/eLife.95257)
Supplement: Figure 3—figure supplement 1—source data 1. — These data are presented as origin plots in Figure 3—figure supplement 1A–D. [file elife-95257-fig3-figsupp1-data1.xlsx]

## Sheet: Figure 3-figure supplement 1
Figure 3-figure supplement 1A			ACF_ADP (200 ms/frame)					Second-order exponential decay function					Figure 3-figure supplement 1B			ACF_ADP (100 ms/frame)					Second-order exponential decay function					Figure 3-figure supplement 1C			ACF_ADP.Pi (100 ms/frame)					Second-order exponential decay function					Figure 3-figure supplement 1D
Distance(nm)	Height(nm)		Time (s)	ACF	Fitted Time (s)	Fitted Curve		Fit y0 + A1e^(-(x-x0)/t1) + A2e^(-(x-x0)/t2)					Distance(nm)	Height(nm)		time (s)	ACF	Fitted Time (s)	Fitted Curve		Fit y0 + A1e^(-(x-x0)/t1) + A2e^(-(x-x0)/t2)					Distance(nm)	Height(nm)		time (s)	ACF	Fitted Time (s)	Fitted Curve		Fit y0 + A1e^(-(x-x0)/t1) + A2e^(-(x-x0)/t2)					ADP_t1 (5fps)	ADP_t2 (5fps)	ADP_t1 (10fps)	ADP_t2 (10fps)	ADP.Pi_t1 (10fps)	ADP.Pi_t2 (10fps)		Experiments	t1 (s)	t2 (s)
0	0.148763		0	1	0	1.03134							0	0.366166		0	1	0	1.03609							0	0.0987177		0	1	0	1.04029							0.13644	0.0161	0.10049	0.00676	0.00095937	0.000663243		F-ADP-actin (200 ms/frame)	0.4 ± 0.2	0.5 ± 0.7
0.391389	0.0743752		0.2	0.75919	0.01695	0.98647		y0	0	0			0.391389	0.263871		0.1	0.71219	0.01695	0.95292		y0	0	0			0.211864	0.103649		0.1	0.73704	0.02203	0.94868		y0	0	0			0.16861	0.02568	0.1058	0.00838	0.0018	0.00203		F-ADP-actin (100 ms/frame)	0.3 ± 0.3	1.2 ± 1.8
0.782779	0.0390105		0.4	0.45525	0.0339	0.94353		x0	0	0			0.782779	0.175861		0.2	0.40455	0.0339	0.87623		x0	0	0			0.423729	0.128832		0.2	0.56566	0.04407	0.86557		x0	0	0			0.17603	0.03116	0.10678	0.02469	0.00195	0.00325		F-ADP.Pi-actin (100 ms/frame)	0.2 ± 0.3	0.5 ± 1.1
1.17417	0.051753		0.6	0.14038	0.05085	0.90246		A1	1.04211	6.87077			1.17417	0.1216		0.3	0.11749	0.05085	0.80553		A1	1.23237	9.32648			0.635593	0.172979		0.3	0.24553	0.0661	0.79016		A1	0.9598	0.43134			0.18939	0.05333	0.11349	0.03615	0.00217	0.00487
1.56556	0.110282		0.8	0.0429	0.0678	0.86316		t1	0.38431	1.66612			1.56556	0.113527		0.4	0.11295	0.0678	0.74035		t1	0.21809	0.44673			0.847458	0.233218		0.4	0.22309	0.08814	0.72173		t1	0.22334	0.1034			0.19173	0.08184	0.12346	0.03987	0.00223	0.01003
1.95695	0.201226		1	0.00346	0.08475	0.82556		A2	-0.01077	6.90088			1.95695	0.154217		0.5	0.08634	0.08475	0.68026		A2	-0.19628	9.33968			1.05932	0.30528		0.5	0.06715	0.11017	0.65963		A2	0.08049	0.44365			0.19278	0.1349	0.12497	0.06366	0.00237	0.059
2.34834	0.303315				0.10169	0.78958		t2	1.99359	1762.49			2.34834	0.235752		0.6	0.05354	0.10169	0.62489		t2	0.36198	4.28344			1.27119	0.383814		0.6	0.07344	0.1322	0.60325		t2	1.2234	7.3034			0.19485	0.14889	0.12767	0.06462	0.00282	0.07579
2.73973	0.392549				0.11864	0.75516							2.73973	0.341388		0.7	0.02157	0.11864	0.57387							1.48305	0.462798		0.7	0.02313	0.15424	0.55208							0.20147	0.1654	0.12884	0.07652	0.0059	0.09596
3.13111	0.448093				0.13559	0.72222							3.13111	0.449145		0.8	0.01993	0.13559	0.52685							1.69491	0.536017		0.8	0.10663	0.17627	0.50561							0.20475	0.1762	0.13074	0.09086	0.0061	0.09622
3.52251	0.457379				0.15254	0.69072							3.52251	0.536483		0.9	0.0211	0.15254	0.48354							1.90678	0.597569		0.9	0.0763	0.19831	0.46341							0.2078	0.18208	0.13091	0.09459	0.01309	0.10745
3.91389	0.41911				0.16949	0.66057							3.91389	0.58506		1	0.01316	0.16949	0.44365							2.11864	0.642361		1	0.10706	0.22034	0.42509							0.22004	0.18461	0.13165	0.09667	0.04151	0.10784
4.30528	0.343413				0.18644	0.63173							4.30528	0.584547				0.18644	0.40691							2.33051	0.666533		1.1	0.07437	0.24237	0.39027							0.2228	0.19941	0.13514	0.10061	0.04769	0.11242
4.69667	0.249126				0.20339	0.60413							4.69667	0.534748				0.20339	0.37308							2.54237	0.667804		1.2	0.07425	0.26441	0.35863							0.23065	0.19968	0.13571	0.11666	0.05402	0.11364
5.08806	0.158971				0.22034	0.57773							5.08806	0.445614				0.22034	0.34193							2.75424	0.64568		1.3	0.01325	0.28644	0.32987							0.23215	0.203	0.1386	0.11897	0.10044	0.12105
5.47945	0.0938743				0.23729	0.55247							5.47945	0.335203				0.23729	0.31327							2.9661	0.601522				0.30847	0.30373							0.23308	0.21472	0.13918	0.11906	0.10316	0.13483
5.87084	0.0679103				0.25424	0.5283							5.87084	0.226002				0.25424	0.28689							3.17797	0.538463				0.33051	0.27995							0.24045	0.21486	0.13991	0.12318	0.10418	0.13581
6.26223	0.0851418				0.27119	0.50518							6.26223	0.140385				0.27119	0.26261							3.38983	0.461168				0.35254	0.25833							0.24334	0.22149	0.14043	0.12323	0.10947	0.14114
6.65362	0.139083				0.28814	0.48305							6.65362	0.0960712				0.28814	0.24028							3.60169	0.375482				0.37458	0.23865							0.25272	0.22729	0.1419	0.13665	0.1095	0.14173
7.04501	0.214824				0.30508	0.46189							7.04501	0.102494				0.30508	0.21975							3.81356	0.287957				0.39661	0.22074							0.25306	0.2303	0.14347	0.14829	0.12406	0.14375
7.4364	0.293146				0.32203	0.44164							7.4364	0.158784				0.32203	0.20086							4.02542	0.20534				0.41864	0.20443							0.25669	0.2498	0.14467	0.14838	0.12429	0.14744
7.82779	0.355495				0.33898	0.42227							7.82779	0.253801				0.33898	0.1835							4.23729	0.134024				0.44068	0.18957							0.25728	0.25985	0.14477	0.14856	0.12855	0.14794
8.21918	0.38849				0.35593	0.40374							8.21918	0.368242				0.35593	0.16755							4.44915	0.0795359				0.46271	0.17604							0.25749	0.27505	0.14775	0.15068	0.134	0.14889
8.61057	0.386846				0.37288	0.386							8.61057	0.478483				0.37288	0.15289							4.66102	0.0460955				0.48475	0.1637							0.25806	0.27597	0.15204	0.15087	0.13536	0.15093
9.00196	0.354075				0.38983	0.36904							9.00196	0.56142				0.38983	0.13942							4.87288	0.0362746				0.50678	0.15244							0.25926	0.28011	0.15617	0.15319	0.13575	0.1512
9.39335	0.300928				0.40678	0.35281							9.39335	0.599352				0.40678	0.12706							5.08475	0.0507978				0.52881	0.14216							0.2607	0.2853	0.15669	0.15441	0.13736	0.15281
9.78474	0.242124				0.42373	0.33728							9.78474	0.583878				0.42373	0.11571							5.29661	0.08849				0.55085	0.13278							0.26605	0.29304	0.15841	0.15768	0.13938	0.15321
10.1761	0.192355				0.44068	0.32243							10.1761	0.517923				0.44068	0.10529							5.50847	0.146381				0.57288	0.12421							0.26806	0.29333	0.15895	0.16868	0.14104	0.15429
10.5675	0.162613				0.45763	0.30822							10.5675	0.415363				0.45763	0.09573							5.72034	0.219955				0.59492	0.11638							0.27083	0.30154	0.1604	0.17161	0.14152	0.15505
10.9589	0.157783				0.47458	0.29462							10.9589	0.298206				0.47458	0.08696							5.9322	0.303519				0.61695	0.10921							0.27186	0.30263	0.16198	0.17488	0.14313	0.15594
11.3503	0.175997				0.49153	0.28162							11.3503	0.191875				0.49153	0.07892							6.14407	0.390668				0.63898	0.10265							0.27599	0.30581	0.16217	0.20689	0.14365	0.15604
11.7417	0.20978				0.50847	0.26918							11.7417	0.119565				0.50847	0.07156							6.35593	0.474798				0.66102	0.09664							0.28228	0.30731	0.16298	0.24597	0.14536	0.15614
12.1331	0.248525				0.52542	0.25727							12.1331	0.0969704				0.52542	0.06481							6.5678	0.54963				0.68305	0.09113							0.28483	0.30844	0.16419	0.25314	0.14578	0.15643
12.5245	0.281556				0.54237	0.24589							12.5245	0.12862				0.54237	0.05863							6.77966	0.609695				0.70508	0.08607							0.28704	0.3098	0.16437	0.29005	0.14639	0.15648
12.9159	0.300916				0.55932	0.23499							12.9159	0.206762				0.55932	0.05297							6.99153	0.650752				0.72712	0.08143							0.29248	0.31321	0.1644	0.29005	0.14705	0.15706
13.3072	0.30319				0.57627	0.22457							13.3072	0.313124				0.57627	0.04779							7.20339	0.670089				0.74915	0.07716							0.29879	0.31606	0.16589	0.31871	0.14731	0.15744
13.6986	0.28998				0.59322	0.2146							13.6986	0.423205				0.59322	0.04306							7.41526	0.666708				0.77119	0.07323							0.30138	0.31623	0.1667	0.32029	0.14771	0.15784
14.09	0.266997				0.61017	0.20507							14.09	0.512076				0.61017	0.03874							7.62712	0.641353				0.79322	0.06961							0.31215	0.31724	0.16765	0.32877	0.14848	0.15824
14.4814	0.242162				0.62712	0.19594							14.4814	0.560294				0.62712	0.03478							7.83898	0.596413				0.81525	0.06628							0.31438	0.31801	0.16784	0.32877	0.14864	0.1592
14.8728	0.223245				0.64407	0.18722							14.8728	0.558439				0.64407	0.03117							8.05085	0.535688				0.83729	0.06319							0.31915	0.31892	0.17065	0.33977	0.14905	0.1592
15.2642	0.215735				0.66102	0.17887							15.2642	0.509146				0.66102	0.02788							8.26271	0.464049				0.85932	0.06035							0.32089	0.31941	0.17072	0.35431	0.15012	0.15999
15.6556	0.221451				0.67797	0.17088							15.6556	0.426127				0.67797	0.02488							8.47458	0.387031				0.88136	0.05771							0.32287	0.32342	0.17103	0.35431	0.1508	0.16
16.047	0.238211				0.69492	0.16325							16.047	0.330457				0.69492	0.02214							8.68644	0.310384				0.90339	0.05527							0.32795	0.32436	0.17154	0.35459	0.15085	0.16224
16.4384	0.2606				0.71186	0.15594							16.4384	0.245121				0.71186	0.01965							8.89831	0.239622				0.92542	0.05301							0.32958	0.32446	0.17181	0.36104	0.15097	0.16371
16.8298	0.281559				0.72881	0.14895							16.8298	0.189271				0.72881	0.01739							9.11017	0.179613				0.94746	0.0509							0.33215	0.32594	0.17251	0.36957	0.15145	0.16377
17.2211	0.294368				0.74576	0.14226							17.2211	0.17368				0.74576	0.01533							9.32203	0.134233				0.96949	0.04894							0.3322	0.32607	0.17417	0.39062	0.1519	0.16487
17.6125	0.294506				0.76271	0.13587							17.6125	0.198546				0.76271	0.01345							9.5339	0.106124				0.99153	0.04712							0.33484	0.32694	0.1815	0.39565	0.15191	0.16493
18.0039	0.280913				0.77966	0.12975							18.0039	0.254142				0.77966	0.01175							9.74576	0.0965466				1.01356	0.04541							0.33659	0.32722	0.18329	0.40237	0.15274	0.16576
18.3953	0.256348				0.79661	0.1239							18.3953	0.323994				0.79661	0.01021							9.95763	0.105358				1.03559	0.04382							0.33707	0.33453	0.18329	0.43552	0.15356	0.16768
18.7867	0.226767				0.81356	0.11831							18.7867	0.38963				0.81356	0.00882							10.1695	0.131099				1.05763	0.04233							0.33727	0.3353	0.18461	0.55267	0.15425	0.16879
19.1781	0.199872				0.83051	0.11295							19.1781	0.435537				0.83051	0.00756							10.3814	0.17118				1.07966	0.04094							0.33882	0.3405	0.19119	0.56596	0.15472	0.16901
19.5695	0.18317				0.84746	0.10783							19.5695	0.452948				0.84746	0.00642							10.5932	0.222139				1.10169	0.03962							0.34022	0.34236	0.19119	0.58149	0.15585	0.16949
19.9609	0.182027				0.86441	0.10294							19.9609	0.441525				0.86441	0.00539							10.8051	0.279955				1.12373	0.03839							0.3422	0.34237	0.19125	0.58149	0.15792	0.16974
20.3523	0.198179				0.88136	0.09825							20.3523	0.408588				0.88136	0.00446							11.0169	0.340379				1.14576	0.03723							0.34348	0.34632	0.19183	0.7313	0.1581	0.16975
20.7436	0.22908				0.89831	0.09377							20.7436	0.366304				0.89831	0.00363							11.2288	0.399263				1.1678	0.03613							0.34505	0.35815	0.19186	1.59629	0.15845	0.17142
21.135	0.268294				0.91525	0.08949							21.135	0.327763				0.91525	0.00288							11.4407	0.45285				1.18983	0.0351							0.34596	0.36087	0.19246	1.6245	0.15859	0.17151
21.5264	0.306856				0.9322	0.08539							21.5264	0.30316				0.9322	0.00221							11.6525	0.498012				1.21186	0.03411							0.3472	0.36201	0.19949	1.65961	0.15874	0.17175
21.9178	0.335338				0.94915	0.08147							21.9178	0.297166				0.94915	0.00161							11.8644	0.532419				1.2339	0.03318							0.34849	0.3627	0.20397	1.65961	0.15906	0.17182
22.3092	0.346141				0.9661	0.07773							22.3092	0.308164				0.9661	0.00108							12.0763	0.554633				1.25593	0.0323							0.34984	0.36333	0.20774	1.78123	0.15929	0.17183
22.7006	0.335466				0.98305	0.07414							22.7006	0.329422				0.98305	0.000604065							12.2881	0.564119				1.27797	0.03146							0.35026	0.38258	0.21001	1.89738	0.15939	0.17233
23.092	0.304456				1	0.07072							23.092	0.351699				1	0.000181993							12.5	0.561193				1.3	0.03066							0.35061	0.38323	0.21251	1.93533	0.15959	0.17297
23.4834	0.259201												23.4834	0.366393												12.7119	0.546907												0.35118	0.38473	0.21769	1.93533	0.15974	0.1744
23.8748	0.209515												23.8748	0.368244												12.9237	0.522899												0.35167	0.3961	0.22513	2.20917	0.16037	0.17477
24.2661	0.166753												24.2661	0.356801												13.1356	0.491212												0.35587	0.40833	0.22588	2.51851	0.16055	0.17691
24.6575	0.14114												24.6575	0.33631												13.3475	0.454116												0.35724	0.43032	0.22767	2.56375	0.16153	0.17704
25.0489	0.139259												25.0489	0.314152												13.5593	0.413942												0.36652	0.50945	0.2291	2.67156	0.16178	0.18223
25.4403	0.162339												25.4403	0.298406												13.7712	0.372932												0.37045	0.51903	0.23094	2.92889	0.16196	0.18329
25.8317	0.20578												25.8317	0.29532												13.9831	0.333135												0.37481	0.53631	0.23605	2.94329	0.16332	0.18669
26.2231	0.260096												26.2231	0.307431												14.1949	0.29633												0.38094	0.55553	0.23626	2.94329	0.16415	0.18738
26.6145	0.31308												26.6145	0.332835												14.4068	0.263991												0.38715	0.5906	0.23819	3.26317	0.16475	0.188
27.0059	0.352674												27.0059	0.365741												14.6186	0.23728												0.38767	0.7768	0.24154	3.28867	0.16605	0.18831
27.3973	0.369849												27.3973	0.398051												14.8305	0.21706												0.39375	0.8264	0.25921	3.49054	0.16669	0.18899
27.7887	0.360777												27.7887	0.421481												15.0424	0.203928												0.4302	1.027	0.33665	3.49295	0.16695	0.18991
28.18	0.327734												28.18	0.42962												15.2542	0.19824												0.43146	1.31365	0.45706	4.96048	0.167	0.19064
28.5714	0.278514												28.5714	0.419437												15.4661	0.200137												0.44538	1.32519	0.7889	5.18039	0.16736	0.19239
28.9628	0.2245												28.9628	0.39194												15.678	0.209554												0.44887	1.48277	0.99519	6.06531	0.16748	0.19605
29.3542	0.177885												29.3542	0.351925												15.8898	0.226223												0.61041	1.48961	1.61336	6.35633	0.16811	0.19763
29.7456	0.148753												29.7456	0.306982												16.1017	0.249648												0.72896	1.74611	1.6552	6.91782	0.17019	0.19824
30.137	0.142766												30.137	0.266018												16.3136	0.279086												0.77262	2.13189	2.09801	8.09139	0.17022	0.19962
30.5284	0.16001												30.5284	0.237609												16.5254	0.313512												0.7927	3.4709			0.17039	0.20221
30.9198	0.195251												30.9198	0.228411												16.7373	0.351609												0.8911	4.67022			0.17048	0.20354
31.3112	0.239498												31.3112	0.241871												16.9491	0.391757												1.13964				0.17052	0.20385
31.7025	0.282386												31.7025	0.277366												17.161	0.432061												1.73139				0.17157	0.20612
32.0939	0.314751												32.0939	0.329924												17.3729	0.470409																0.17192	0.20688
32.4853	0.330712												32.4853	0.390659												17.5847	0.50456																0.17193	0.21152
32.8767	0.328764												32.8767	0.447978												17.7966	0.532273																0.17215	0.21284
33.2681	0.311667												33.2681	0.489546												18.0085	0.551454																0.17292	0.21322
33.6595	0.285266												33.6595	0.504771												18.2203	0.560329																0.17327	0.22321
34.0509	0.256651												34.0509	0.487384												18.4322	0.557608																0.17348	0.22698
34.4423	0.232201												34.4423	0.437529												18.6441	0.542643																0.17453	0.23159
34.8337	0.216083												34.8337	0.362705												18.8559	0.515552																0.17473	0.23351
35.2251	0.20955												35.2251	0.277084												19.0678	0.477287																0.17552	0.23752
35.6164	0.211174												35.6164	0.199054												19.2797	0.429657																0.17571	0.2383
36.0078	0.217819												36.0078	0.147307												19.4915	0.375265																0.17605	0.24221
36.3992	0.226001												36.3992	0.136282												19.7034	0.317387																0.17749	0.25395
36.7906	0.233139												36.7906	0.172076												19.9153	0.259776																0.17765	0.26386
37.182	0.238332												37.182	0.250012												20.1271	0.206414																0.17776	0.26774
37.5734	0.242406												37.5734	0.354729												20.339	0.161226																0.17819	0.27003
37.9648	0.247293												37.9648	0.463085												20.5509	0.127777																0.17837	0.28527
38.3562	0.254953												38.3562	0.549368												20.7627	0.10897																0.17941	0.29816
38.7475	0.266265												38.7475	0.591649												20.9746	0.106795																0.17953	0.30217
39.1389	0.280269												39.1389	0.577629												21.1864	0.122113																0.18019	0.30328
39.5303	0.294067												39.5303	0.508374												21.3983	0.154544																0.18112	0.31578
39.9217	0.303465												39.9217	0.398745												21.6102	0.202426																0.18125	0.33882
40.3131	0.304191												40.3131	0.274231												21.822	0.26289																0.18538	0.35618
40.7045	0.293359												40.7045	0.164813												22.0339	0.332025																0.18553	0.36441
41.0959	0.270709												41.0959	0.0974071												22.2458	0.405142																0.18674	0.38937
41.4873	0.239221												41.4873	0.0888635												22.4576	0.477098																0.18701	0.38963
41.8787	0.204843												41.8787	0.141433												22.6695	0.542678																0.18769	0.39042
42.2701	0.175316												42.2701	0.242006												22.8814	0.596989																0.18796	0.41211
42.6615	0.158352												42.6615	0.365401												23.0932	0.635842																0.1886	0.41357
43.0528	0.159594												43.0528	0.480869												23.3051	0.656089																0.19006	0.42408
43.4442	0.180928												43.4442	0.560088												23.517	0.655889																0.19088	0.43776
43.8356	0.219596												43.8356	0.584479												23.7288	0.634873																0.19126	0.44005
44.227	0.268438												44.227	0.549867												23.9407	0.594202																0.19331	0.46821
44.6184	0.317269												44.6184	0.467247												24.1525	0.536505																0.19355	0.46862
45.0098	0.355118												45.0098	0.359489												24.3644	0.465701																0.1941	0.48561
45.4012	0.372808												45.4012	0.254959												24.5763	0.386728																0.19415	0.50884
45.7926	0.365252												45.7926	0.17986												24.7881	0.305174																0.19476	0.52784
46.184	0.332877												46.184	0.151412												25	0.226872																0.19515	0.55394
46.5753	0.281768												46.5753	0.173705												25.2119	0.157463																0.1975	0.57319
46.9667	0.222466												46.9667	0.237283												25.4237	0.101975																0.20095	0.58271
47.3581	0.167659												47.3581	0.322394												25.6356	0.0644483																0.20102	0.67166
47.7495	0.129294												47.7495	0.404901												25.8475	0.04763																0.20429	0.68377
48.1409	0.115825												48.1409	0.463064												26.0593	0.0527746																0.2053	0.79588
48.5323	0.130243												48.5323	0.483315												26.2712	0.0795502																0.20651	0.81005
48.9237	0.169397												48.9237	0.463453												26.483	0.126067																0.20793	1.09405
49.3151	0.224755												49.3151	0.412529												26.6949	0.189023																0.20896	1.18859
49.7065	0.284425												49.7065	0.347615												26.9068	0.263949																0.21173	1.2234
50.0979	0.335915												50.0979	0.288536												27.1186	0.345542																0.2121	1.36953
50.4892	0.368948												50.4892	0.25214												27.3305	0.428057																0.21507	1.44782
50.8806	0.377647												50.8806	0.247718												27.5424	0.50572																0.21938	1.53958
51.272	0.361582												51.272	0.274786												27.7542	0.573148																0.22035	1.62106
51.6634	0.325483												51.6634	0.323709												27.9661	0.625721																0.22225	1.91473
52.0548	0.277772												52.0548	0.378835												28.178	0.659906																0.22334	2.60786
52.4462	0.228391												52.4462	0.423152												28.3898	0.673488																0.22334	2.61304
52.8376	0.1865												52.8376	0.443121												28.6017	0.665707																0.2341	2.8124
53.229	0.15867												53.229	0.43236												28.8136	0.637288																0.23521	2.93087
53.6204	0.147949												53.6204	0.393276												29.0254	0.590363																0.23825	3.43087
54.0117	0.153917												54.0117	0.336283												29.2373	0.528304																0.24338	3.46538
54.4031	0.173547												54.4031	0.276942												29.4491	0.455467																0.24364	7.17626
54.7945	0.202456												54.7945	0.231816												29.661	0.376875																0.24546	8.52719
55.1859	0.236088												55.1859	0.21415												29.8729	0.297866																0.2469
55.5773	0.270456												55.5773	0.230432												30.0847	0.223728																0.24852
55.9687	0.302302												55.9687	0.278644												30.2966	0.159346																0.24867
56.3601	0.328789												56.3601	0.34858												30.5085	0.108887																0.25624
56.7515	0.347062												56.7515	0.424109												30.7203	0.0755361																0.26893
57.1429	0.354041												57.1429	0.486871												30.9322	0.0613126																0.26994
57.5342	0.346765												57.5342	0.52055												31.1441	0.0669576																0.29162
57.9256	0.323301												57.9256	0.51481												31.3559	0.091912																0.31501
58.317	0.284005												58.317	0.46801												31.5678	0.134376																0.37917
58.7084	0.232629												58.7084	0.388076												31.7797	0.191446																0.59296
59.0998	0.17673												59.0998	0.29126												31.9915	0.259316																3.62458
59.4912	0.126953												59.4912	0.198938												32.2034	0.333531
59.8826	0.0950842												59.8826	0.133029												32.4153	0.409276
60.274	0.0911967												60.274	0.110954												32.6271	0.481678
60.6654	0.120588												60.6654	0.141239												32.839	0.546109
61.0568	0.181427												61.0568	0.220819												33.0508	0.59847
61.4481	0.263973												61.4481	0.33484												33.2627	0.635437
61.8395	0.351848												61.8395	0.45922												33.4746	0.654662
62.2309	0.425337												62.2309	0.565643												33.6864	0.654911
62.6223	0.466025												62.6223	0.627991												33.8983	0.636142
63.0137	0.461643												63.0137	0.628769												34.1102	0.599506
63.4051	0.409783												63.4051	0.56396												34.322	0.547279
63.7965	0.319349												63.7965	0.444938												34.5339	0.482733
64.1879	0.209151												64.1879	0.296731												34.7458	0.409939
64.5793	0.103818												64.5793	0.152781												34.9576	0.333525
64.9706	0.0279508												64.9706	0.0472677												35.1695	0.258394
65.362	0												65.362	0.00677746												35.3814	0.189426
65.7534	0.0274811												65.7534	0.0434065												35.5932	0.131167
66.1448	0.104848												66.1448	0.151136												35.8051	0.0875399
66.5362	0.214655												66.5362	0.306586												36.017	0.0615822
66.9276	0.331761												66.9276	0.474157												36.2288	0.055233
67.319	0.429489												67.319	0.61443												36.4407	0.0691852
67.7104	0.486141												67.7104	0.69378												36.6525	0.102811
68.1018	0.490153												68.1018	0.692778												36.8644	0.154172
68.4931	0.442576												68.4931	0.611185												37.0763	0.220115
68.8845	0.356314												68.8845	0.468204												37.2881	0.29645
69.2759	0.252435												69.2759	0.297837												37.5	0.378202
69.6673	0.154651												69.6673	0.140519												37.7119	0.45993
70.0587	0.0834955												70.0587	0.0331332												37.9237	0.536077
70.4501	0.0517522												70.4501	0												38.1356	0.601352
70.8415	0.0622079												70.8415	0.047107												38.3475	0.651098
71.2329	0.108123												71.2329	0.161036												38.5593	0.681628
71.6243	0.176011												71.6243	0.312766												38.7712	0.690509
72.0157	0.249725												72.0157	0.46527												38.983	0.676763
72.407	0.314584												72.407	0.582865												39.1949	0.64097
72.7984	0.360419												72.7984	0.639861												39.4068	0.58527
73.1898	0.382859												73.1898	0.626359												39.6186	0.513242
73.5812	0.382827												73.5812	0.549821												39.8305	0.429687
73.9726	0.364752												73.9726	0.432252												40.0424	0.340311
74.364	0.334352												74.364	0.303923												40.2542	0.251333
74.7554	0.296837												74.7554	0.195448												40.4661	0.169055
75.1468	0.256105												75.1468	0.130319												40.678	0.0994
75.5382	0.215013												75.5382	0.119763												40.8898	0.0474825
75.9296	0.176351												75.9296	0.161041												41.1017	0.0172201
76.3209	0.143846												76.3209	0.239351												41.3136	0.0110284
76.7123	0.12254												76.7123	0.332552												41.5254	0.0296214
77.1037	0.118115												77.1037	0.41727												41.7373	0.0719327
77.4951	0.135241												77.4951	0.474714												41.9492	0.135169
77.8865	0.175444												77.8865	0.494777												42.161	0.214993
78.2779	0.235316												78.2779	0.47755												42.3729	0.30582
78.6693	0.305881												78.6693	0.432154												42.5847	0.401219
79.0607	0.373641												79.0607	0.373444												42.7966	0.494372
79.4521	0.423281												79.4521	0.317672												43.0085	0.578574
79.8434	0.44146												79.8434	0.278269												43.2203	0.647726
80.2348	0.420652												80.2348	0.262819												43.4322	0.69679
80.6262	0.361868												80.6262	0.271809												43.6441	0.722162
81.0176	0.27534												81.0176	0.299296												43.8559	0.721944
81.409	0.178761												81.409	0.3351												44.0678	0.696091
81.8004	0.0933913												81.8004	0.367854												44.2797	0.646416
82.1918	0.0389639												82.1918	0.388068												44.4915	0.576459
82.5832	0.0287444												82.5832	0.390492												44.7034	0.49123
82.9746	0.066065												82.9746	0.375259												44.9153	0.396835
83.3659	0.143306												83.3659	0.347618												45.1271	0.300032
83.7573	0.24362												83.7573	0.316414												45.339	0.207733
84.1487	0.344953												84.1487	0.29169												45.5508	0.126498
84.5401	0.425305												84.5401	0.282006												45.7627	0.0620587
84.9315	0.467846												84.9315	0.292093												45.9746	0.0189123
85.3229	0.464623												85.3229	0.321392												46.1864	0
85.7143	0.41797												85.7143	0.363844												46.3983	0.00651014
86.1057	0.339423												86.1057	0.409067												46.6102	0.0378099
86.4971	0.246577												86.4971	0.444709												46.822	0.0915108
86.8885	0.158811												86.8885	0.459507												47.0339	0.163661
87.2798	0.0930256												87.2798	0.446369												47.2458	0.24905
87.6712	0.0603826												87.6712	0.4047												47.4576	0.341593
88.0626	0.0646766												88.0626	0.341319												47.6695	0.434785
88.454	0.102463												88.454	0.269551												47.8814	0.522157
88.8454	0.16462												88.8454	0.20655												48.0932	0.597741
89.2368	0.238724												89.2368	0.16931												48.3051	0.656474
89.6282	0.31159												89.6282	0.170281												48.517	0.694536
90.0196	0.371415												90.0196	0.213667												48.7288	0.709592
90.411	0.409286												90.411	0.293463												48.9407	0.700924
90.8024	0.420009												90.8024	0.393922												49.1525	0.669441
91.1937	0.402413												91.1937	0.49258												49.3644	0.617588
91.5851	0.359315												91.5851	0.565296												49.5763	0.54914
91.9765	0.297223												91.9765	0.592185												49.7881	0.468919
92.3679	0.225753												92.3679	0.562969												50	0.38244
92.7593	0.156618												92.7593	0.480317												50.2119	0.295532
93.1507	0.10209												93.1507	0.360153												50.4237	0.213939
93.5421	0.0729809												93.5421	0.228625												50.6356	0.142944
93.9335	0.0764099												93.9335	0.116307												50.8475	0.0870356
94.3248	0.113838												94.3248	0.0509254												51.0593	0.0496347
94.7162	0.179975												94.7162	0.0503951												51.2712	0.0329011
95.1076	0.263051												95.1076	0.117942												51.483	0.0376256
95.499	0.346686												95.499	0.240643												51.6949	0.0632131
95.8904	0.413135												95.8904	0.391895												51.9068	0.107753
96.2818	0.44728												96.2818	0.537346												52.1186	0.168169
96.6732	0.440392												96.6732	0.642926												52.3305	0.240439
97.0646	0.392651												97.0646	0.683038												52.5424	0.31986
97.456	0.313634												97.456	0.646895												52.7542	0.401355
97.8474	0.22047												97.8474	0.541408												52.9661	0.479785
98.2387	0.133998												98.2387	0.389842												53.178	0.550269
98.6301	0.0738245												98.6301	0.226529												53.3898	0.608467
99.0215	0.0535284												99.0215	0.088872												53.6017	0.650838
99.4129	0.0772871												99.4129	0.0085482												53.8136	0.67484
99.8043	0.138835												99.8043	0.00404745												54.0254	0.67907
100.196	0.223065												100.196	0.0763201												54.2373	0.663341
100.587	0.309862												100.587	0.208583												54.4492	0.62868
100.978	0.379164												100.978	0.370308												54.661	0.577267
101.37	0.415888												101.37	0.524428												54.8729	0.512296
101.761	0.413458												101.761	0.636014												55.0847	0.437792
102.153	0.375024												102.153	0.680365												55.2966	0.358367
102.544	0.31214												102.544	0.648605												55.5085	0.278948
102.935	0.24137												102.935	0.549501												55.7203	0.204484
103.327	0.179801												103.327	0.407118												55.9322	0.139644
103.718	0.140738												103.718	0.254939												56.1441	0.0885367
104.11	0.1307												104.11	0.127885												56.3559	0.054451
104.501	0.148438												104.501	0.0541525												56.5678	0.0396444
104.892	0.186076												104.892	0.0488039												56.7797	0.045191
105.284	0.231883												105.284	0.110589												56.9915	0.0708976
105.675	0.273784												105.675	0.222694												57.2034	0.115296
106.067	0.302559												106.067	0.357166												57.4153	0.175718
106.458	0.313873												106.458	0.481868												57.6271	0.248439
106.849	0.308704												106.849	0.568261												57.839	0.328907
107.241	0.292212												107.241	0.598096												58.0508	0.412011
107.632	0.271564												107.632	0.567423												58.2627	0.492411
108.023	0.253487												108.023	0.486996												58.4746	0.564876
108.415	0.242307												108.415	0.379053												58.6864	0.624631
108.658	0.239016												108.806	0.27136												58.8983	0.667677
													109.198	0.190075												59.1102	0.69107
													109.589	0.153267												59.322	0.69313
													109.98	0.166729												59.5339	0.673573
													110.372	0.223099												59.7458	0.633548
													110.763	0.304427												59.9576	0.575578
													111.155	0.387434												60.1695	0.503405
													111.546	0.449978												60.3814	0.421745
													111.937	0.476962												60.5932	0.33598
													112.329	0.464104												60.8051	0.251794
													112.72	0.418573												61.017	0.174783
													113.112	0.356412												61.2288	0.110075
													113.503	0.297534												61.4407	0.0619706
													113.894	0.259772												61.6525	0.0336498
													114.286	0.253703												61.8644	0.0269487
													114.677	0.279718												62.0763	0.0422353
													115.069	0.328177												62.2881	0.078388
													115.46	0.382536												62.5	0.13288
													115.851	0.424521												62.7119	0.20196
													116.243	0.439777												62.9237	0.280924
													116.634	0.422326												63.1356	0.364447
													117.025	0.376485												63.3475	0.446958
													117.417	0.315683												63.5593	0.523025
													117.808	0.258501												63.7712	0.587728
													118.2	0.223119												63.983	0.636987
													118.591	0.221802												64.1949	0.667826
													118.982	0.257065												64.4068	0.678552
													119.374	0.320673												64.6186	0.668838
													119.765	0.395789												64.8305	0.639717
													120.157	0.461661												65.0424	0.59347
													120.548	0.499505												65.2542	0.533439
													120.939	0.497876												65.4661	0.46377
													121.331	0.455987												65.678	0.38911
													121.722	0.384031												65.8898	0.314285
													122.114	0.300421												66.1017	0.243977
													122.505	0.226765												66.3136	0.182424
													122.896	0.182005												66.5254	0.133168
													123.288	0.17738												66.7373	0.0988587
													123.498	0.213573												66.9492	0.0811307
																										67.161	0.0805476
																										67.3729	0.0966224
																										67.5847	0.127902
																										67.7966	0.172102
																										68.0085	0.226291
																										68.2203	0.28709
																										68.4322	0.350888
																										68.6441	0.414054
																										68.8559	0.473132
																										69.0678	0.525008
																										69.2797	0.567053
																										69.4915	0.597225
																										69.7034	0.614138
																										69.9153	0.6171
																										70.1271	0.606115
																										70.339	0.581867
																										70.5508	0.545669
																										70.7627	0.499407
																										70.9746	0.445449
																										71.1864	0.386555
																										71.3983	0.325761
																										71.6102	0.266253
																										71.822	0.211233
																										72.0339	0.163763
																										72.2458	0.12662
																										72.4576	0.102136
																										72.6695	0.092054
																										72.8814	0.0973965
																										73.0932	0.118363
																										73.3051	0.154261
																										73.5169	0.203489
																										73.7288	0.26357
																										73.9407	0.331241
																										74.1525	0.402611
																										74.3644	0.473366
																										74.5763	0.539025
																										74.7881	0.595222
																										75	0.638011
																										75.2119	0.664155
																										75.4237	0.671386
																										75.6356	0.658619
																										75.8475	0.626081
																										76.0593	0.575364
																										76.2712	0.509372
																										76.4831	0.432171
																										76.6949	0.348747
																										76.9068	0.264675
																										77.1186	0.185743
																										77.3305	0.117532
																										77.5424	0.065001
																										77.7542	0.0321054
																										77.9661	0.0214751
																										78.178	0.0341873
																										78.3898	0.0696497
																										78.6017	0.12561
																										78.8136	0.198292
																										79.0254	0.282652
																										79.2373	0.372741
																										79.4492	0.462136
																										79.661	0.544421
																										79.8729	0.613672
																										80.0847	0.664907
																										80.2966	0.694469
																										80.5085	0.700304
																										80.7203	0.682125
																										80.9322	0.641424
																										81.1441	0.581361
																										81.3559	0.506513
																										81.5678	0.422512
																										81.7797	0.335608
																										81.9915	0.252184
																										82.2034	0.178266
																										82.4153	0.119063
																										82.6271	0.0785804
																										82.839	0.0593363
																										83.0508	0.0621933
																										83.2627	0.0863307
																										83.4454	0.129347
