# Supplementary material for: Deciphering the actin structure-dependent preferential cooperative binding of cofilin
Source: eLife. 2024 Aug 2;13:RP95257. doi: 10.7554/eLife.95257 (PMC11296705; doi:10.7554/eLife.95257)
Supplement: Figure 3—source data 1. — These data are presented as origin plots in Figure 3A–F. [file elife-95257-fig3-data1.xlsx]

## Sheet: Figure 3
Figure 3A	Length(nm)	Height(nm)		Figure 3B	Protomer Pairs	Mean HHP(nm)	SD(nm)	N(HHP)	Calculated HHP(nm)		Figure 3C	8.5 pairs/HHP	7.5 pairs/HHP	6.5 pairs/HHP	5.5 pairs/HHP	4.5 pairs/HHP		Overall MAD(nm)	Mean	SD	N (HHP)		Figure 3D	Distance (nm)	Height (nm)		Figure 3E	Time (s)	ACF								Figure 3F	Time constants (t1, t2 (s))	N
	0	0			4.5	28.5592	1.37272	5	24.75			4.36472	4.89503	5.18298	5.09271	5.95254			5.06772	0.273183	2226			0	0.3193			0	1		Fitting with second-order exponetial decay							0.00329	122
	0.415984	0.00842476			5.5	29.3302	1.81572	182	30.25			4.36996	5.0678	4.85074	4.95262	6.10109								0.40816	0.27194			0.5	0.16025		y0 + A1e^(-(x-x0)/t1) + A2e^(-(x-x0)/t2)							0.00355
	0.831967	0.0660782			6.5	33.1349	1.27955	1355	35.75			4.31915	4.89945	4.90681	4.91693	6.37842								0.81633	0.31206			1	0.07574									0.00499
	1.24795	0.132688			7.5	37.1971	2.03769	624	41.25			4.39983	4.95262	4.85074	5.53171	6.47086								1.22449	0.43364			1.5	0.14127		y0	0	0					0.00518
	1.66393	0.187566			8.5	39.1421	2.43773	60	46.75			4.40453	4.95262	4.98363	5.21969	6.82958								1.63265	0.60333			2	0.05404		x0	0	0					0.00545
	2.07992	0.244597										4.35559	4.77249	5.05008	5.74814									2.04082	0.77126			2.5	0.09104		A1	0.84134	0.07735					0.00634
	2.4959	0.304764										4.40453	4.95262	4.91718	4.61364									2.44898	0.88814			3	0.07334		t1	0.14417	0.09082					0.00648
	2.91188	0.366007										4.25771	4.82373	5.05256	5.90114									2.85714	0.92167			3.5	0.000557625		A2	0.15869	0.06895					0.00667
	3.32787	0.46797										4.20878	4.89503	4.91718	5.74814									3.26531	0.86598			4	0.02644		t2	2.72309	1.48391					0.00717
	3.74385	0.648333										4.30665	4.71053	4.84328	5.96922									3.67347	0.74107			4.5	0.03571									0.00825
	4.15984	0.853816										4.79605	4.83745	4.90456	4.8372									4.08163	0.58373													0.0085
	4.57582	1.02009										4.74711	4.71448	4.91744	4.91617									4.4898	0.43467													0.00873
	4.9918	1.11269										5.13862	4.10437	4.98363	5.29434									4.89796	0.32713													0.00973
	5.40779	1.12332										5.13862	4.65902	4.71583	4.83445									5.30612	0.2806													0.01
	5.82377	1.08165										4.40453	4.71448	4.90718	5.14307									5.71429	0.29993													0.01
	6.23975	1.02914										4.79605	4.27077	4.78157	4.91617									6.12245	0.37775													0.01
	6.65574	1.00765										4.60029	4.88087	5.0558	5.20251									6.53061	0.4976													0.01033
	7.07172	1.07779										4.60029	4.9918	5.1198	5.2187									6.93878	0.63634													0.01037
	7.48771	1.2548										4.50241	5.05211	4.73581	5.82377									7.34694	0.76633													0.01088
	7.90369	1.49643										4.9918	4.88087	4.92781	5.74814									7.7551	0.85906													0.01095
	8.31967	1.75106										5.04074	4.87946	4.92781	5.74814									8.16326	0.89104													0.01163
	8.73566	1.98537										4.40453	4.93634	4.54382	6.05067									8.57143	0.85095													0.01178
	9.15164	2.18529										4.55135	4.93778	4.5994	5.74814									8.97959	0.7453													0.01197
	9.56762	2.33697										4.55135	5.04727	4.47673	5.2187									9.38776	0.59901													0.0135
	9.98361	2.41529										4.50241	5.10273	4.99001	4.9918									9.79592	0.44961													0.01612
	10.3996	2.38653										4.69817	4.9918	4.73581	5.8994									10.2041	0.33612													0.01615
	10.8156	2.22921										4.74711	4.9918	4.9918	5.82377									10.6122	0.28684													0.01626
	11.2316	1.98279										4.84498	5.04727	4.98623	5.29434									11.0204	0.31086													0.01762
	11.6475	1.74849										4.84498	5.04727	5.05088	5.14307									11.4286	0.3967													0.01905
	12.0635	1.62131										4.74711	4.88298	4.92781	5.97504									11.8367	0.51796													0.01926
	12.4795	1.63962										4.60029	4.88087	4.86381	5.06744									12.2449	0.64308													0.02008
	12.8955	1.77912										5.57907	4.9918	4.92781	5.14307									12.6531	0.74484													0.02619
	13.3115	1.97185										5.13862	4.93634	4.67182	5.29434									13.0612	0.80591													0.03464
	13.7275	2.14844										5.28544	5.04727	5.1198	5.14307									13.4694	0.81976													0.03657
	14.1434	2.27682										4.42078	5.04727	5.1838	5.29434									13.8775	0.78843													0.0375
	14.5594	2.33712										4.47139	4.9918	4.80128	5.14307									14.2857	0.7198													0.03933
	14.9754	2.29715										4.35796	4.9918	4.60849	5.8994									14.6939	0.62611													0.05127
	15.3914	2.13436										4.26242	4.93318	4.7957	4.91617									15.102	0.52378													0.05595
	15.8074	1.8955										4.40453	4.9918	4.9918	5.14307									15.5102	0.43259													0.06218
	16.2234	1.63882										4.50421	5.04727	5.0558	5.06744									15.9184	0.37278													0.06864
	16.6394	1.40369										4.35559	5.04727	5.17678	5.14307									16.3265	0.35963													0.07547
	17.0553	1.21236										4.41396	4.86506	5.0558	4.9918									16.7347	0.39765													0.08002
	17.4713	1.07755										4.45347	4.93634	5.0604	5.97572									17.1429	0.47749													0.08756
	17.8873	0.997024										4.45347	4.88087	5.0558	5.06744									17.551	0.57773													0.09358
	18.3033	0.986763										4.35559	4.93536	5.1198	5.29434									17.9592	0.67178													0.1
	18.7193	1.06762										4.50241	4.93634	5.0558	5.2187									18.3673	0.737													0.1
	19.1352	1.20674										4.55135	4.76995	4.92781	5.29434									18.7755	0.76194													0.1
	19.5512	1.32177										4.55135	4.93634	5.1838	5.29434									19.1837	0.74844													0.1
	19.9672	1.33286										5.33438	4.9918	5.1838	5.4456									19.5918	0.70798													0.10753
	20.3832	1.22359										4.45347	5.04727	4.92781	5.4456									20	0.65472													0.11539
	20.7992	1.03262										4.45347	4.88087	5.44699	5.29434									20.4082	0.59917													0.12383
	21.2152	0.820377										4.45347	4.83073	4.92781	5.36997									20.8163	0.54593													0.12634
	21.6312	0.627668										4.45347	4.93634	4.9278	5.14307									21.2245	0.49605													0.13004
	22.0471	0.491183										4.40453	5.04727	4.9918	5.29434									21.6327	0.45182													0.1443
	22.4631	0.440396										4.64923	5.10273	4.80036	5.52124									22.0408	0.42045													0.14875
	22.8791	0.507765										4.79605	4.93634	4.73581	5.29434									22.449	0.41346													0.15596
	23.2951	0.663041										4.64942	5.04727	5.0558	5.06744									22.8571	0.44177													0.16107
	23.7111	0.822864										4.60029	4.88087	5.0558	5.2187									23.2653	0.50865													0.16231
	24.1271	0.924569										4.64923	4.71448	4.79981	5.4456									23.6735	0.60477													0.16477
	24.543	0.940854										4.69817	4.93634	5.24438	5.89941									24.0816	0.70826													0.1648
	24.959	0.878404											4.88087	4.9918	4.84054									24.4898	0.79062													0.16643
	25.375	0.781246											4.9918	5.18839	4.9918									24.898	0.82612													0.16688
	25.791	0.668127											4.9918	5.0558	6.05067									25.3061	0.80095													0.17446
	26.207	0.527613											4.9918	4.99627	5.21813									25.7143	0.71835													0.18281
	26.6229	0.382226											4.93634	4.86381	5.2187									26.1225	0.59806													0.2
	27.0389	0.27595											4.82541	5.1198	5.2187									26.5306	0.47069													0.2
	27.4549	0.23715											4.87775	4.79981	5.2187									26.9388	0.36908													0.202
	27.8709	0.275682											4.93634	4.86381	5.36997									27.3469	0.31968													0.21253
	28.2869	0.36231											4.71448	4.9918	5.97504									27.7551	0.33583													0.22032
	28.7029	0.454742											4.93634	4.92781	5.2187									28.1633	0.41439													0.23343
	29.1188	0.515229											4.98464	4.9918	5.14307									28.5714	0.53611													0.2364
	29.5348	0.550068											4.15984	5.24779	5.2187									28.9796	0.66989													0.2459
	29.9508	0.595241											4.88087	5.1198	5.06744									29.3878	0.78037													0.25462
	30.3668	0.663008											4.43265	5.1198	5.97504									29.7959	0.83755													0.27143
	30.7828	0.735445											5.21366	4.79981	6.1263									30.2041	0.82588													0.27534
	31.1988	0.780955											5.26913	5.0558	5.97504									30.6122	0.74987													0.28157
	31.6148	0.775456											5.10273	5.0558	4.91617									31.0204	0.63341													0.3
	32.0307	0.706821											5.04727	5.12047	5.21871									31.4286	0.51224													0.3
	32.4467	0.59045											5.10273	5.0558	5.06744									31.8367	0.42182													0.3
	32.8627	0.472807											5.04727	5.0558	5.2187									32.2449	0.38512													0.31818
	33.2787	0.386144											5.04727	5.1838	5.06744									32.6531	0.40532													0.32406
	33.6947	0.340022											5.04727	5.0558	5.06744									33.0612	0.46661													0.34625
	34.1107	0.35425											4.82541	4.92781	5.29434									33.4694	0.54255													0.34796
	34.5266	0.450184											4.93634	5.0558	5.2187									33.8775	0.60799													0.35512
	34.9426	0.609852											4.99538	5.0558	5.21871									34.2857	0.64882													0.3597
	35.3586	0.793054											5.10273	5.0558	5.21871									34.6939	0.66522													0.37309
	35.7746	0.968823											4.88011	4.9918	5.14307									35.102	0.66729													0.40002
	36.1906	1.11756											5.04727	4.92781	5.36997									35.5102	0.66628													0.40002
	36.6066	1.23548											5.10936	5.1198	5.2187									35.9184	0.66642													0.4037
	37.0225	1.30389											4.82541	4.86381	4.84054									36.3265	0.6622													0.4186
	37.4385	1.30053											4.88087	4.86381	5.36997									36.7347	0.64245													0.48358
	37.8545	1.2308											4.82541	4.92781	5.2187									37.1429	0.59891													0.49265
	38.2705	1.11634											4.82541	5.1198	5.15053									37.551	0.53421													0.50017
	38.6865	0.976854											4.82541	4.9918	5.2187									37.9592	0.4645													0.51536
	39.1025	0.852101											4.88087	5.0558	5.14307									38.3674	0.41467													0.52317
	39.5184	0.81802											4.82541	5.0558	4.91617									38.7755	0.40809													0.59796
	39.9344	0.918402											5.04727	5.1838	5.14307									39.1837	0.45552													0.59838
	40.3504	1.12138											4.9918	4.73581	5.4456									39.5918	0.54861													0.59911
	40.7664	1.35244											4.88087	4.92781	5.14307									40	0.66115													0.60015
	41.1824	1.55145											4.82541	4.9918	5.14307									40.4082	0.75768													0.60267
	41.5984	1.69503											4.93634	4.71764	5.21871									40.8163	0.80612													0.66889
	42.0144	1.76878											4.9918	5.61584	5.14307									41.2245	0.78908													0.68967
	42.4303	1.78648											5.04727	4.98598	5.14307									41.6327	0.71002													0.76475
	42.8463	1.76941											5.10273	4.73581	5.14307									42.0408	0.59197													0.80158
	43.2623	1.73889											4.93634	5.0558	4.9918									42.449	0.46999													0.89019
	43.6783	1.69775											4.93634	5.1198	5.11255									42.8571	0.3802													0.90109
	44.0943	1.64595											4.93634	4.79981	5.2187									43.2653	0.34895													0.95086
	44.5102	1.61562											4.9918	5.31179	5.2187									43.6735	0.38528													0.98607
	44.9262	1.64601											4.82541	4.9918	4.9918									44.0816	0.4786													1.15429
	45.3422	1.75069											4.75927	5.1838	5.67251									44.4898	0.60187													1.18306
	45.7582	1.92691											4.88087	5.0558	5.7464									44.898	0.7194													1.23679
	46.1742	2.14228											4.82541	4.86381	5.8994									45.3061	0.79711													1.37338
	46.5902	2.3416											4.76995	5.1198	5.16463									45.7143	0.81251													1.44974
	47.0061	2.47222											4.88087	4.79981	5.90274									46.1225	0.76148													1.61148
	47.4221	2.48588											4.9918	4.92811	5.06744									46.5306	0.65959													1.72808
	47.8381	2.37267											4.93634	4.92781	5.82377									46.9388	0.5374													1.73451
	48.2541	2.16776											4.9918	4.9918	5.2187									47.3469	0.43096													1.82793
	48.6701	1.913											4.82541	4.9278	5.2187									47.7551	0.37062													1.89178
	49.0861	1.64854											4.93634	5.1198	5.2187									48.1633	0.37191													2.77225
	49.502	1.42103											4.65902	5.12483	5.06744									48.5714	0.43154													3.39689
	49.918	1.28015											4.82541	5.1198	5.06744									48.9796	0.52965													3.86304
	50.334	1.25525											4.88087	5.1198	5.74814									49.3878	0.63719													4.05401
	50.75	1.3235											4.76995	5.0558	5.8994									49.7959	0.72518
	51.166	1.42833											4.82541	5.1838	5.06744									50.2041	0.77281
	51.582	1.54331											4.88087	5.0558	4.9918									50.6123	0.77167
	51.998	1.65264											5.04727	5.0558	5.13664									51.0204	0.72578
	52.4139	1.72234											4.9918	5.1198	5.2187									51.4286	0.64843
	52.8299	1.73108											4.82541	5.1838	5.06744									51.8367	0.55784
	53.2459	1.6536											4.49262	5.1198	4.84054									52.2449	0.47329
	53.6619	1.47703											5.21366	5.75977	5.14307									52.6531	0.4123
	54.0779	1.25081											4.43716	4.9918	5.14307									53.0612	0.38842
	54.4939	1.03368											4.9918	4.9918	5.74814									53.4694	0.409
	54.9098	0.86318											4.9918	4.9918	5.36997									53.8775	0.47284
	55.3258	0.76114											4.49262	5.0558	5.06744									54.2857	0.56848
	55.7418	0.740232											5.21366	5.1198	5.06744									54.6939	0.67465
	56.1578	0.775829											4.43716	5.1198	5.4456									55.102	0.76413
	56.5738	0.817846											4.9918	4.9918	5.29434									55.5102	0.81081
	56.9898	0.837687											4.9918	5.1838	5.06744									55.9184	0.79813
	57.4057	0.830985											4.38169	5.0575	5.4456									56.3265	0.72585
	57.8217	0.800011											4.9918	4.73581	5.29434									56.7347	0.61193
	58.2377	0.746854											4.93634	4.92781	5.2187									57.1429	0.4881
	58.6537	0.668182											4.9918	4.86381	5.29434									57.551	0.39001
	59.0697	0.577643											4.9918	4.92781	5.6725									57.9592	0.34557
	59.4857	0.484625											4.9918	4.86381	4.9918									58.3674	0.36572
	59.9016	0.397607											5.04727	4.92781	5.14307									58.7755	0.44152
	60.3176	0.336473											4.9918	4.92781	5.14307									59.1837	0.5483
	60.7336	0.327166											5.04727	4.92781	5.6725									59.5918	0.65525
	61.1496	0.362686											5.04727	4.9918	5.97504									60	0.73591
	61.5656	0.428986											4.93634	4.86381	5.2187									60.4082	0.77545
	61.9816	0.516351											4.43716	4.86381	6.27757									60.8163	0.77226
	62.3975	0.613157											5.10273	4.92781	4.84054									61.2245	0.7342
	62.8135	0.692231											5.04727	4.86381	5.36997									61.6327	0.67259
	63.2295	0.727293											4.32623	5.95176	5.2187									62.0408	0.59772
	63.6455	0.70422											4.54261	5.1198	5.29434									62.449	0.51804
	64.0615	0.625636											4.93634	4.79981	5.59687									62.8571	0.44271
	64.4775	0.512905											4.88087	4.9918	5.82377									63.2653	0.38469
	64.8935	0.378603											4.76995	5.0558	5.29434									63.6735	0.36067
	65.3094	0.252584											4.76995	4.79981	5.2187									64.0816	0.38629
	65.7254	0.168233											4.88087	5.0558	5.14307									64.4898	0.46775
	66.1414	0.127012											4.88087	4.86381	5.59687									64.898	0.59424
	66.5574	0.128013											4.9918	4.86381	5.6725									65.3061	0.73591
	66.9734	0.173376											4.93634	4.92781	5.97504									65.7143	0.85055
	67.3893	0.253044											4.82541	4.92781	5.8994									66.1225	0.89751
	67.8053	0.350662											4.60355	5.1198	5.36997									66.5306	0.85385
	68.2213	0.464867											4.93634	4.92781	5.2187									66.9388	0.72551
	68.6373	0.585317											5.10273	4.92781	5.29433									67.3469	0.54803
	69.0533	0.671864											4.93634	4.9918	5.82377									67.7551	0.37561
	69.4693	0.710745											4.93634	5.0558	5.14307									68.1633	0.26255
	69.8852	0.705305											4.93634	4.86381	5.14307									68.5714	0.24422
	70.3012	0.647034											4.9918	4.92781	5.2187									68.9796	0.32521
	70.7172	0.53275											5.10273	4.9918	5.29434									69.3878	0.47871
	71.1332	0.388461											5.04727	4.9918	5.14307									69.7959	0.65683
	71.5492	0.274353											4.32623	4.92781	5.29253									70.2041	0.80696
	71.9652	0.229228											5.1582	4.86381	5.29434									70.6122	0.88815
	72.3812	0.294085											5.04727	4.92781	5.36997									71.0204	0.88189
	72.7971	0.487159											5.21366	4.79981	5.29434									71.4286	0.7951
	73.2131	0.776205											4.9918	4.92781	5.29433									71.8367	0.65574
	73.6291	1.11493											5.04727	4.86381	5.36997									72.2449	0.50373
	74.0451	1.44522											5.04727	4.86047	6.1263									72.6531	0.37999
	74.4611	1.70251											4.82165	4.9918	5.36997									73.0612	0.31628
	74.877	1.85685											5.32459	4.9918	5.29434									73.4694	0.32759
	75.293	1.89727											4.27077	4.9918	6.20194									73.8776	0.40842
	75.709	1.82429											5.04727	4.92781										74.2857	0.53414
	76.125	1.64873											5.04727	5.63178										74.6939	0.66767
	76.541	1.42932											5.10273	5.37579										75.102	0.77022
	76.957	1.24119											5.1582	5.24779										75.5102	0.81323
	77.373	1.14432											5.1582	4.86381										75.9184	0.78736
	77.7889	1.15806											4.60355	4.92781										76.3265	0.70514
	78.2049	1.27208											4.9918	4.92781										76.7347	0.59581
	78.6209	1.46675											5.21366	4.79981										77.1429	0.49444
	79.0369	1.71001											4.88087	5.1198										77.551	0.42965
	79.4529	1.9657											5.1582	5.56778										77.9592	0.41486
	79.8688	2.18035											5.32459	4.9918										78.3674	0.44629
	80.2848	2.30114											5.04727	4.92781										78.7755	0.50739
	80.7008	2.28964											4.60355	5.0558										79.1837	0.57701
	81.1168	2.15739											5.1582	5.1198										79.5918	0.63701
	81.5328	1.94391											5.32459	4.86381										80	0.67641
	81.9488	1.69907											4.54809	5.63178										80.4082	0.69156
	82.3648	1.44958											5.10273	4.9918										80.8163	0.6839
	82.7807	1.2417											4.54809	4.9918										81.2245	0.65757
	83.1967	1.10753											4.49262	4.86381										81.6326	0.61842
	83.6127	1.03887											4.88087	4.92781										82.0408	0.57397
	84.0287	1.02051											4.93634	4.9918										82.449	0.53308
	84.4447	1.03018											4.9918	4.86381										82.8572	0.50433
	84.8607	1.04575											4.9918	4.86381										83.2653	0.49334
	85.2766	1.06805											4.93634	4.86381										83.6735	0.50066
	85.6926	1.08697											4.76995	4.92781										84.0816	0.52193
	86.1086	1.08775											4.76995	5.0558										84.4898	0.55058
	86.5246	1.04377											4.76995	4.79981										84.898	0.58153
	86.9406	0.920856											4.82541	4.86381										85.3061	0.61327
	87.3566	0.71448											4.82541	5.1198										85.7143	0.64645
	87.7725	0.481423											4.82541	5.1198										86.1225	0.67969
	88.1885	0.301734											4.9918	4.92781										86.5306	0.70555
	88.6045	0.237251											4.82541	5.24779										86.9388	0.71032
	89.0205	0.28999											4.88087	5.1838										87.3469	0.67967
	89.4365	0.406056											4.82541	4.92781										87.7551	0.60795
	89.8525	0.531196											4.82541	5.0558										88.1633	0.50634
	90.2685	0.635207											4.38169	5.24779										88.5714	0.40393
	90.6844	0.708396											4.93634	5.31179										88.9796	0.33923
	90.8172	0.72485											4.88087	5.0558										89.3878	0.34436
													4.88087	5.0558										89.7959	0.42924
													4.93634	5.1838										90.2041	0.57378
													4.93634	5.24779										90.6123	0.73303
													4.93634	5.24779										91.0204	0.85386
													4.88087	5.31179										91.4286	0.89581
													4.9918	5.24779										91.8367	0.84651
													4.76995	5.24779										92.2449	0.72487
													5.04727	5.1838										92.6531	0.57125
													4.9918	5.1198										93.0612	0.43035
													4.9918	5.1198										93.4694	0.33538
													4.9918	4.92781										93.8776	0.3005
													5.10273	5.24779										94.2857	0.32301
													5.10273	5.1838										94.6939	0.39149
													5.10273	4.92781										95.102	0.49335
													5.09963	5.0558										95.5102	0.6169
													4.38169	5.24779										95.9184	0.74787
													5.10273	5.31179										96.3265	0.86444
													4.98701	5.0558										96.7347	0.93681
													4.93634	5.0558										97.1429	0.93449
													4.9918	5.1838										97.551	0.83955
													4.9918	5.24779										97.9592	0.65958
													5.04727	5.24779										98.3674	0.43279
													5.10273	5.31179										98.7755	0.22066
													5.1582	5.24779										99.1837	0.08939
													5.10273	5.24779										99.5918	0.0869
													5.10273	5.1838										100	0.22438
													5.10273	5.0558										100.408	0.47021
													5.04727	5.1198										100.816	0.75837
													4.9918	5.1838										101.225	1.00847
													4.93634	5.1838										101.633	1.14989
													4.9918	5.24779										102.041	1.14235
													4.9918	5.1838										102.449	0.98659
													4.9918	5.0558										102.857	0.7233
													5.04727	5.24779										103.265	0.42137
													4.43716	5.31179										103.674	0.15945
													5.10273	5.24779										104.082	0.00561
													4.9918	5.0558										104.49	0
													5.10273	5.1838										104.898	0.14456
													5.04727	5.1198										105.306	0.40217
													4.93634	5.1838										105.714	0.70598
													5.10273	5.43978										106.123	0.9766
													5.1582	5.0558										106.531	1.14327
													5.1582	4.9918										106.939	1.16292
													5.1582	5.0558										107.347	1.03192
													5.1582	4.9918										107.755	0.78697
													5.04727	4.9918										108.163	0.49479
													5.04727	5.0558										108.571	0.2336
													4.88087	5.1838										108.98	0.07157
													5.1582	5.1198										109.388	0.04849
													5.1582	5.1198										109.796	0.16551
													5.04727	4.92781										110.204	0.38575
													5.04727	5.1198										110.612	0.64558
													5.10273	4.9918										111.02	0.87324
													5.21366	5.0558										111.429	1.00955
													5.04727	4.9918										111.837	1.02435
													5.10273	4.92781										112.245	0.92372
													5.10273	4.9918										112.653	0.74577
													4.60355	4.92781										113.061	0.54649
													4.38169	4.9918										113.469	0.38109
													4.49262	5.1198										113.878	0.28742
													4.49262	5.0558										114.286	0.27734
													4.49262	4.92781										114.694	0.33815
													5.32459	5.1198										115.102	0.44196
													5.21366	4.9278										115.51	0.55789
													4.54809	5.1198										115.918	0.66133
													5.1582	4.79981										116.326	0.73737
													5.32459	4.9918										116.735	0.77891
													5.26913	5.1198										117.143	0.78297
													4.49262	4.9918										117.551	0.74896
													5.21366	4.86381										117.959	0.68042
													5.21366	5.0558										118.367	0.58844
													5.1582	5.1838										118.775	0.49313
													5.21366	5.1838										119.184	0.41999
													5.1582	5.1838										119.592	0.39149
													5.1582	5.1198										120	0.41737
													5.32459	5.24779										120.408	0.48906
													5.21366	5.24779										120.816	0.58195
													5.32459	5.24779										121.225	0.66511
													5.26913	4.9918										121.633	0.71381
													5.1582	5.0558										122.041	0.71872
													5.1582	5.1838										122.449	0.68725
													5.21366	5.0558										122.857	0.63707
													5.26913	5.1838										123.265	0.58616
													5.10273	4.9918										123.674	0.54534
													4.65902	5.1198										124.082	0.51709
													5.1582	5.1838										124.49	0.49999
													5.10273	5.1838										124.898	0.49465
													4.65902	5.1198										125.306	0.50599
													4.82541	5.24779										125.714	0.5396
													4.60355	5.37579										126.123	0.59465
													5.38005	5.24779										126.531	0.65849
													4.76995	5.0558										126.939	0.70823
													4.54809	5.0558										127.347	0.71986
													5.38005	5.1838										127.755	0.68096
													5.49098	5.1838										128.163	0.59957
													5.43552	5.37579										128.571	0.50369
													5.43552	5.0558										128.98	0.43024
													5.43552	4.9918										129.388	0.40886
													4.71448	4.9918										129.796	0.44869
													5.43552	5.1198										130.204	0.53477
													5.26913	5.0558										130.612	0.63562
													5.32459	4.67182										131.02	0.71733
													5.49098	5.1198										131.429	0.75673
													5.32459	5.1198										131.837	0.74746
													5.21366	4.92781										132.245	0.69754
													4.65902	4.9918										132.653	0.62215
													5.38005	4.92781										133.061	0.53728
													5.32459	4.92781										133.469	0.45769
													5.38005	4.92781										133.877	0.39851
													5.49098	4.92781										134.286	0.37648
													5.49098	4.86381										134.694	0.40649
													5.54645	5.1838										135.102	0.49331
													5.49098	4.92781										135.51	0.62288
													5.49098	4.86381										135.918	0.75999
													5.49179	4.92781										136.327	0.85709
													5.49098	4.9918										136.735	0.87265
													4.71448	5.1198										137.143	0.79116
													4.82541	4.9918										137.551	0.63428
													4.88087	5.1198										137.959	0.45562
													5.10273	5.31179										138.367	0.32008
													4.9918	5.24779										138.775	0.27655
													4.88087	4.92781										139.12	0.33716
													4.38169	5.1198
													5.04727	5.1198
													4.43716	5.1198
													5.32459	4.9918
													5.49098	5.1838
													5.54645	4.9918
													5.54645	5.1198
													5.49098	5.1198
													4.65902	5.1838
													5.31581	5.1198
													5.26913	5.24779
													5.21366	5.1198
													5.60191	5.1838
													4.82541	5.24779
													5.32459	5.1838
													5.21366	5.24779
													5.38141	5.1838
													5.04727	5.24779
													4.60355	4.92781
													5.38005	5.50378
													4.71448	5.37579
													5.26913	5.24779
													5.32459	5.1198
													4.65902	4.92781
													5.26913	5.24779
													5.26913	5.24779
													5.32459	5.1198
													5.38005	5.1838
													4.76995	5.24779
													5.38005	5.1838
													5.26912	5.31179
													5.21366	5.1838
													4.71448	5.1838
													5.21366	5.37579
													5.1582	4.9918
													5.26913	5.24779
													5.38005	4.79981
													5.26913	5.0558
													4.88087	5.0558
													4.43716	5.1838
													4.43716	5.1198
													4.38169	5.0558
													4.93634	5.1838
													4.9918	5.37579
													4.93634	5.1838
													5.32459	4.92781
													4.43716	4.9918
													4.88087	5.24779
													4.27077	4.73581
													4.32623	5.0558
													4.32623	4.92781
													4.32623	4.92781
													4.32623	5.69578
													4.93634	5.49868
													4.43716	5.69578
													4.49262	5.0558
													4.38169	4.79981
													4.32623	4.9918
													4.43716	4.9278
													4.49262	5.1838
													4.38169	4.60782
													4.95262	4.79981
													4.83745	4.73581
													5.0678	4.92781
													4.89503	5.1838
													4.94089	5.24779
													5.07468	5.0558
													4.95263	4.9918
													5.01021	4.86381
													5.07427	4.92781
													5.01371	4.9918
													5.01021	5.75977
													4.89504	5.12206
													5.01196	4.9918
													5.07016	5.43978
													4.61016	5.1198
													4.93634	4.9918
													4.88087	5.1198
													4.8857	5.1198
													4.82545	5.1198
													4.38169	4.9918
													4.27077	5.0558
													4.9918	5.1198
													4.88087	5.75977
													5.10273	5.1838
													5.1582	5.1838
													4.93634	5.1198
													4.93634	5.1838
													5.04328	5.1198
													4.9918	5.1198
													4.82487	5.1838
													5.04727	5.0558
													4.32412	5.0558
													4.32623	5.0558
													4.7729	4.86381
													4.15983	5.24779
													4.82541	5.1198
													5.1582	5.1198
													4.93634	5.0558
													4.9918	5.0558
													4.9918	5.1198
													4.93634	5.1198
													5.04727	4.9918
													4.32623	5.1838
													4.93634	5.1198
													4.88087	5.1198
													4.93634	5.0558
													4.82541	5.1838
													4.9918	5.1198
													4.83729	4.9918
													4.27793	5.0558
													4.88087	5.0558
													5.1582	5.0558
													5.10273	5.0558
													5.10273	5.24779
													5.04727	5.24779
													4.93711	5.0558
													5.10273	5.1198
													5.04727	5.1198
													4.93487	5.1198
													4.27077	5.1838
													4.32623	5.1838
													5.10273	5.18379
													4.93634	5.24779
													4.82541	5.1838
													5.04727	5.24779
													4.9918	5.24779
													4.88087	5.24779
													4.82541	5.1838
													4.93634	5.0558
													5.10273	5.1838
													4.88087	5.1838
													5.04727	5.24779
													5.10273	5.1838
													5.1582	5.37579
													4.9918	5.1198
													4.93634	5.24779
													4.93634	5.24779
													4.27077	5.24779
													4.9918	5.1198
													4.93634	5.31179
													4.27077	5.24779
													4.88087	4.9918
													4.43716	5.1838
													4.93634	5.1838
													4.82541	5.1838
													4.9918	5.0558
													4.9918	5.1838
													4.82541	5.0558
													4.60355	5.1198
													4.60355	5.1838
													4.60355	5.1838
													4.60355	5.1198
													4.49262	5.1198
													5.10273	5.0558
													4.49262	5.1198
													5.10273	5.1838
													4.93634	5.1838
													4.88087	5.1838
													5.04727	5.1838
													5.1582	5.1838
													5.1582	5.1198
													4.66449	5.31179
													4.71448	5.1838
													4.76995	5.1838
													4.76995	5.24779
													4.76995	5.1838
													4.65902	5.0558
													5.04727	5.1838
													4.88087	5.37579
													4.9918	5.24779
													5.43552	5.24779
													5.21366	5.1198
													5.04727	5.1838
													5.04727	5.1198
													5.10273	5.1198
													4.9918	5.24779
													5.26913	5.24779
													5.10273	5.24779
													5.1582	5.1838
													5.26913	5.1838
													5.32459	5.1838
													5.26913	5.24779
													4.9918	5.31154
													4.88087	5.24779
													5.10273	5.50378
													5.1582	5.31179
													5.21366	5.1198
													5.04727	5.1838
													5.21366	5.1838
													5.10273	5.1838
													4.71448	5.24779
													5.10273	5.43978
													4.60355	5.56778
													5.38005	5.56778
													5.26913	5.37579
													5.1582	5.37579
													5.21366	5.43978
													5.32459	5.43978
													5.26913	5.37579
													4.9918	5.43978
													5.1582	5.50378
													4.9918	5.37579
													5.1582	5.24779
													4.88087	5.31179
													5.32459	5.43978
													4.60355	5.31179
													5.21366	5.31179
													5.10273	5.63178
													4.9918	5.50378
													4.88087	5.43978
													5.04727	5.56778
													4.43716	5.43978
													5.04727	5.24779
													5.05169	5.37579
													5.1582	5.37579
													5.10273	5.31179
													4.9918	5.37579
													5.04727	5.50378
													4.88087	5.56778
													4.88087	4.9918
													4.82541	5.0558
													5.1582	4.9918
													4.49262	5.1838
													5.1582	5.1198
													4.50148	5.0558
													5.10273	5.24779
													4.99222	4.9918
													4.43716	5.0558
													4.49262	5.1838
													5.04727	4.9918
													4.9918	5.1198
													5.04727	5.1838
													4.43716	4.9918
													4.9918	5.0558
													5.04727	4.92781
													5.1582	5.1198
													5.04727	4.9918
													4.49262	5.0558
													5.10273	5.1198
													4.9918	4.9918
													5.1582	4.9918
													5.21366	5.1198
													5.16407	4.9918
													4.54809	4.86381
													4.65902	4.9918
													4.65902	5.1198
													4.54809	5.1838
													4.54809	5.37579
													5.26913	5.56778
													5.26913	5.1838
													5.21366	5.56778
													5.21366	5.37579
													4.65902	5.31179
													4.65902	5.24779
													4.71448	4.9918
													5.38005	5.37579
													5.32459	5.37579
													5.21366	5.50378
													5.26913	5.24779
													5.21366	5.31179
													5.32459	5.31179
													5.38005	5.37579
													5.1582	5.1198
													5.32459	5.1198
													5.32459	5.37579
													5.1582	5.24779
													5.26913	5.37579
													5.38005	5.31179
													5.38005	5.24779
													5.26913	5.43978
													5.1582	5.37579
													5.32459	5.43978
													5.32459	5.31179
													5.26913	5.43978
													4.65902	5.50378
													5.21366	5.31179
													5.21366	5.31179
													5.26913	5.31179
													5.26913	5.50378
													5.1582	5.24779
													5.32459	5.37579
														5.37579
														5.31179
														4.35183
														5.37579
														5.1838
														4.92781
														5.0558
														5.1838
														5.1198
														5.1838
														5.0558
														5.1198
														5.1198
														4.9918
														5.0558
														5.0558
														4.92781
														4.9278
														5.1838
														4.35183
														4.41583
														5.10958
														4.47982
														5.12685
														5.1198
														5.1838
														5.1838
														5.1198
														5.1198
														5.1198
														5.1838
														5.05429
														5.1198
														5.1198
														5.0558
														4.92781
														5.1198
														4.8644
														5.1198
														5.24779
														5.18379
														5.37579
														5.24779
														5.24779
														5.37579
														5.50378
														5.0558
														5.1198
														5.06226
														5.1198
														4.9918
														5.00048
														5.1198
														4.92781
														5.1198
														4.86381
														4.9918
														4.9918
														4.9918
														5.0558
														4.9918
														5.1198
														5.0558
														4.9278
														5.1198
														4.9918
														5.0558
														4.28783
														4.9918
														4.99846
														4.9918
														5.0558
														5.0558
														4.86381
														4.92781
														4.86381
														4.28783
														5.1838
														5.1198
														5.0558
														5.24779
														5.1838
														5.0558
														4.9918
														4.92781
														5.18379
														5.0558
														5.1198
														5.1198
														4.41583
														5.1198
														5.0558
														4.47982
														4.9918
														4.9918
														4.28783
														5.0558
														4.9918
														5.0558
														5.0558
														5.0558
														5.0558
														5.1198
														5.1838
														5.1198
														5.1838
														5.0558
														5.0558
														5.17883
														4.9918
														5.1838
														5.0558
														5.0558
														4.9278
														4.92781
														5.0558
														5.18379
														5.1198
														5.1198
														5.1198
														4.9918
														5.0558
														4.79981
														4.92781
														5.0558
														4.9918
														5.24779
														5.1838
														5.1198
														4.92781
														5.1838
														5.31179
														5.1198
														5.1838
														5.1838
														4.98363
														5.78102
														4.99401
														4.98363
														4.91718
														4.99327
														4.91718
														4.9869
														5.19701
														4.91718
														5.05319
														4.91718
														4.98363
														5.06009
														4.71341
														4.86317
														4.79981
														4.73581
														4.9918
														4.74063
														4.79981
														5.01022
														5.04694
														4.99597
														5.04988
														4.9918
														4.86381
														5.37579
														4.86381
														4.79981
														5.05513
														4.79834
														4.92781
														4.86746
														4.86381
														5.1838
														4.98526
														5.11904
														5.12143
														5.0558
														4.8057
														4.98526
														5.0558
														4.9918
														4.99728
														4.92781
														4.92781
														5.0558
														4.9918
														4.86381
														4.9918
														5.31179
														4.9918
														4.80571
														4.92781
														4.9918
														4.9939
														4.92781
														4.9918
														5.0558
														4.9918
														5.05944
														4.9918
														5.0558
														4.92781
														4.9918
														4.99126
														4.9239
														5.0558
														4.99728
														5.11805
														4.92781
														5.0558
														4.92781
														5.1198
														4.92321
														5.05693
														4.92781
														5.0558
														5.17933
														5.0558
														4.92781
														4.28783
														5.0558
														5.0558
														4.9918
														5.0558
														5.0558
														4.9918
														4.9918
														5.0558
														5.1838
														4.92781
														5.1198
														5.12539
														4.7976
														5.05088
														5.0558
														4.9918
														4.92781
														4.92781
														4.86381
														5.0558
														4.9918
														5.0558
														4.9918
														4.9918
														5.31389
														4.9918
														4.86381
														4.9918
														5.0558
														4.9918
														4.92781
														4.9918
														4.9918
														4.9918
														5.1198
														5.1838
														4.9918
														5.24779
														5.0558
														4.9918
														4.9918
														5.00998
														5.13574
														4.93362
														5.0558
														4.92781
														5.1198
														4.9918
														5.12457
														4.92781
														4.99696
														5.06492
														4.9918
														4.9918
														4.9918
														4.92781
														5.1198
														5.05549
														4.9918
														5.0558
														5.0558
														4.92781
														4.92278
														5.1198
														5.43978
														5.0558
														5.1838
														5.125
														5.31179
														5.24779
														5.1838
														5.1198
														5.1838
														5.0558
														4.86381
														5.1198
														5.05974
														5.0558
														5.0558
														5.24779
														5.1198
														5.1198
														5.0558
														4.28783
														4.9278
														5.11334
														4.9918
														4.86381
														4.91912
														4.79981
														4.79981
														4.9918
														5.1198
														5.0558
														4.92781
														5.0558
														4.9918
														5.0558
														4.86381
														4.9918
														4.86381
														5.0558
														4.9918
														5.0558
														4.9278
														4.9918
														5.75977
														5.1198
														4.92115
														4.9278
														4.92781
														4.9918
														5.1838
														5.1198
														5.0558
														4.9918
														5.1838
														4.9918
														4.86381
														5.75977
														5.0558
														5.56778
														4.9918
														5.1198
														4.9918
														5.0558
														4.86381
														4.92781
														4.9918
														5.1198
														4.9918
														4.86381
														4.92781
														4.86381
														5.0558
														5.0558
														4.9918
														4.92781
														4.92781
														4.9918
														5.24779
														5.31179
														4.9918
														4.92781
														4.80477
														4.9918
														5.1838
														5.24779
														5.0558
														5.0558
														5.1198
														5.0558
														4.86381
														4.9918
														5.0558
														5.0558
														4.9918
														4.92781
														5.0558
														4.9918
														4.9918
														5.24779
														5.1838
														5.31179
														5.24779
														5.1198
														5.31179
														5.24779
														4.9918
														5.0558
														5.1838
														5.24779
														5.1838
														4.9918
														5.24779
														5.1198
														4.47982
														4.9918
														5.1838
														5.1198
														5.24779
														5.1838
														5.31179
														5.24779
														5.1198
														5.31179
														5.24779
														4.9918
														5.0558
														5.1838
														5.24779
														5.1838
														4.9918
														5.24779
														5.1198
														4.47982
														4.9918
														5.1838
														5.1198
														5.31179
														4.47982
														4.28783
														5.1198
														5.0558
														5.31179
														5.1198
														5.24779
														5.18379
														5.24779
														5.0558
														4.9918
														4.92781
														4.47982
														4.9918
														5.1838
														4.9918
														4.92781
														4.92781
														4.9918
														5.1198
														5.1838
														5.31179
														4.9918
														4.92781
														5.0558
														5.0558
														4.92781
														5.0558
														5.0558
														5.0558
														5.0558
														4.9918
														4.9918
														4.9918
														4.92781
														5.24779
														4.9918
														5.1838
														4.9278
														4.92781
														4.9918
														4.92781
														4.92781
														5.0558
														5.1198
														5.1838
														5.1838
														5.0558
														5.0558
														4.9918
														4.86381
														4.92781
														5.1198
														5.24779
														5.1198
														5.1838
														5.24779
														4.9918
														5.37579
														5.1198
														5.1838
														5.0558
														5.0558
														5.0558
														4.9918
														4.9918
														5.31179
														5.1838
														5.24779
														5.1198
														4.73581
														5.56778
														4.9918
														4.92781
														5.0558
														4.9918
														4.9918
														5.0558
														5.1198
														4.9918
														4.92781
														4.9918
														4.9918
														5.0558
														5.1838
														5.0558
														5.18379
														4.9918
														4.9918
														4.9918
														5.0558
														5.0558
														4.92781
														5.0558
														5.1198
														5.31179
														5.1838
														5.44992
														5.43978
														5.1198
														5.1198
														5.24779
														5.43822
														5.43978
														5.24779
														5.1198
														5.24779
														5.1198
														4.81118
														5.31179
														5.50378
														5.24779
														5.31179
														5.24779
														5.1838
														5.1838
														5.31179
														5.24779
														5.31179
														5.24779
														5.1838
														5.1838
														5.1838
														5.31179
														5.31179
														5.50378
														5.1838
														5.1838
														5.43978
														5.1838
														5.1838
														5.24779
														5.31179
														5.24779
														5.1198
														5.24779
														5.50378
														6.27175
														5.50378
														5.24779
														5.37579
														5.50378
														5.37579
														5.43978
														4.86268
														4.92781
														5.1838
														4.92781
														5.18379
														5.1198
														5.0558
														4.9918
														5.69578
														4.79981
														4.92781
														4.86381
														4.86381
														5.0558
														4.9918
														4.86381
														4.73581
														5.1198
														5.0558
														5.11651
														5.24779
														4.9918
														5.1198
														5.0558
														5.1198
														4.9918
														4.9918
														4.86381
														5.82377
														4.9918
														4.92781
														4.92781
														5.24779
														5.11754
														4.9918
														5.1198
														5.1838
														5.1198
														5.1198
														5.0558
														5.0558
														5.0558
														5.1198
														5.24779
														5.12337
														5.0558
														5.1838
														5.1838
														5.1198
														5.0558
														5.0558
														5.24779
														5.1198
														5.0558
														5.0558
														5.0558
														5.1838
														5.1838
														5.1198
														5.0558
														5.1838
														5.1198
														5.1198
														4.9918
														5.1198
														5.1198
														5.1198
														5.24779
														5.0558
														5.1198
														5.0558
														5.24931
														5.1198
														5.18379
														5.1198
														5.0558
														5.0558
														5.1198
														5.1838
														4.41583
														5.1838
														5.1838
														5.24779
														5.88777
														5.37519
														5.24779
														5.24779
														5.24779
														5.31179
														5.0558
														5.1838
														5.18379
														5.0558
														5.0558
														4.92781
														5.1838
														5.1198
														5.1198
														5.1198
														5.0558
														5.1838
														5.31179
														5.1838
														5.1198
														5.31179
														5.31179
														5.1838
														5.1838
														5.1198
														5.31179
														5.24779
														5.31179
														5.18379
														5.37579
														5.31179
														5.24779
														5.37579
														5.24779
														5.24779
														5.31179
														5.37579
														5.50378
														5.31179
														5.1838
														5.1838
														5.31179
														5.24779
														5.31179
														5.43979
														5.31179
														5.31179
														5.31179
														5.31179
														5.50378
														5.43886
														5.43979
														5.43978
														5.31179
														5.24779
														5.31179
														5.24779
														5.37579
														5.43978
														5.31179
														5.1838
														5.31179
														5.1838
														5.31179
														5.50378
														5.37579
														5.31179
														5.43979
														5.37579
														5.37579
														5.50378
														5.37579
														5.31179
														5.24779
														5.43979
														5.24779
														5.1198
														5.31179
														5.31179
														5.24779
														5.37579
														5.37579
														5.31179
														5.37579
														5.43978
