# Supplementary material for: Deciphering the actin structure-dependent preferential cooperative binding of cofilin
Source: eLife. 2024 Aug 2;13:RP95257. doi: 10.7554/eLife.95257 (PMC11296705; doi:10.7554/eLife.95257)
Supplement: Figure 4—figure supplement 1—source data 1. — These data are presented as origin plots in Figure 4—figure supplement 1B–E. [file elife-95257-fig4-figsupp1-data1.xlsx]

## Sheet: Figure 4-figure supplement 1
Figure 4-figure supplement 1B-C				Figure 4-figure supplement 1D	After performing Hilbert transformation				Figure 4-figure supplement 1E	After performing Hilbert transformation
Distance (nm)	Height before BPF (nm)	Height after BPF (nm)			Distance (nm)	ACF before BPF (nm)	Envelop before BPF (nm)			Distance (nm)	ACF after BPF (nm)	Envelop after BPF (nm)
0	4.17221	0.932026			0	1	1			0	1	1.00006
0.391389	4.04015	0.994641			0.391389	0.967557	0.978733			0.391389	0.917364	0.998302
0.782779	3.66116	1.0121			0.782779	0.899491	0.935834			0.782779	0.685058	0.993794
1.17417	3.3086	0.983424			1.17417	0.817097	0.88319			1.17417	0.343499	0.98678
1.56556	3.09661	0.915977			1.56556	0.73733	0.829159			1.56556	-0.0485077	0.97714
1.95695	2.96792	0.82378			1.95695	0.668768	0.781215			1.95695	-0.424337	0.965193
2.34834	2.96389	0.724508			2.34834	0.61415	0.741553			2.34834	-0.721382	0.950925
2.73973	3.1593	0.635906			2.73973	0.571984	0.712443			2.73973	-0.891978	0.934593
3.13111	3.28146	0.572346			3.13111	0.538049	0.690929			3.13111	-0.911438	0.916289
3.52251	3.15928	0.542246			3.52251	0.509678	0.675867			3.52251	-0.781783	0.896173
3.91389	2.93116	0.54684			3.91389	0.485856	0.66606			3.91389	-0.53058	0.874402
4.30528	2.64331	0.580522			4.30528	0.46499	0.661752			4.30528	-0.205236	0.851056
4.69667	2.34611	0.632616			4.69667	0.446316	0.661973			4.69667	0.136093	0.826304
5.08806	2.1065	0.690117			5.08806	0.42936	0.668794			5.08806	0.435197	0.800192
5.47945	2.0681	0.740756			5.47945	0.410855	0.682538			5.47945	0.644096	0.772872
5.87084	2.19982	0.775692			5.87084	0.382996	0.700933			5.87084	0.733039	0.744405
6.26223	2.26762	0.791213			6.26223	0.338695	0.716159			6.26223	0.694848	0.714922
6.65362	2.2599	0.789109			6.65362	0.278114	0.723418			6.65362	0.544946	0.684538
7.04501	2.1404	0.775666			7.04501	0.206118	0.720068			7.04501	0.317273	0.653378
7.4364	1.71444	0.759571			7.4364	0.129752	0.706051			7.4364	0.0570537	0.621621
7.82779	1.08308	0.749284			7.82779	0.0574082	0.681997			7.82779	-0.188095	0.589406
8.21918	0.621922	0.750526			8.21918	-0.00401927	0.651669			8.21918	-0.376944	0.556956
8.61057	0.703274	0.764553			8.61057	-0.0515453	0.61913			8.61057	-0.481701	0.524442
9.00196	1.09876	0.787639			9.00196	-0.0869699	0.588711			9.00196	-0.492083	0.492092
9.39335	1.41428	0.811946			9.39335	-0.113093	0.561492			9.39335	-0.415838	0.460108
9.78474	1.62613	0.827592			9.78474	-0.132594	0.539608			9.78474	-0.275846	0.428696
10.1761	1.71706	0.825417			10.1761	-0.149497	0.523891			10.1761	-0.104565	0.398072
10.5675	1.56894	0.799778			10.5675	-0.167283	0.513949			10.5675	0.0629205	0.368409
10.9589	1.27317	0.750645			10.9589	-0.187302	0.507702			10.9589	0.195797	0.339918
11.3503	0.951878	0.684417			11.3503	-0.210068	0.504216			11.3503	0.27305	0.312754
11.7417	0.671555	0.613155			11.7417	-0.23526	0.501609			11.7417	0.286614	0.287108
12.1331	0.520416	0.552296			12.1331	-0.261524	0.498923			12.1331	0.241729	0.263144
12.5245	0.702572	0.517298			12.5245	-0.287488	0.495715			12.5245	0.154621	0.241033
12.9159	1.11415	0.51992			12.9159	-0.31356	0.49301			12.9159	0.0482036	0.220952
13.3072	1.36968	0.565009			13.3072	-0.339471	0.489391			13.3072	-0.0531963	0.203043
13.6986	1.2756	0.648588			13.6986	-0.36237	0.482975			13.6986	-0.128922	0.187456
14.09	1.02324	0.757795			14.09	-0.379149	0.472798			14.09	-0.165869	0.17425
14.4814	0.847824	0.872827			14.4814	-0.389558	0.460676			14.4814	-0.160456	0.163433
14.8728	0.795628	0.970625			14.8728	-0.395484	0.448342			14.8728	-0.118436	0.154888
15.2642	0.797157	1.02959			15.2642	-0.398622	0.436882			15.2642	-0.0527714	0.148373
15.6556	0.833584	1.03435			15.6556	-0.399492	0.426004			15.6556	0.0198234	0.143554
16.047	0.875778	0.979572			16.047	-0.39812	0.415646			16.047	0.0828129	0.139988
16.4384	0.830276	0.871879			16.4384	-0.395423	0.406436			16.4384	0.123368	0.137237
16.8298	0.713425	0.729336			16.8298	-0.393791	0.400378			16.8298	0.134757	0.134845
17.2211	0.544861	0.578488			17.2211	-0.39607	0.399468			17.2211	0.117183	0.132426
17.6125	0.305679	0.4494			17.6125	-0.402311	0.40335			17.6125	0.0770093	0.129656
18.0039	0.0597992	0.36964			18.0039	-0.408802	0.4088			18.0039	0.0247021	0.126279
18.3953	0	0.358423			18.3953	-0.411513	0.412857			18.3953	-0.0279418	0.122132
18.7867	0.192585	0.422146			18.7867	-0.409691	0.41528			18.7867	-0.0705749	0.117097
19.1781	0.515659	0.552322			19.1781	-0.404693	0.417531			19.1781	-0.0964444	0.111149
19.5695	0.863792	0.726476			19.5695	-0.396656	0.420208			19.5695	-0.103452	0.104305
19.9609	1.16879	0.911963			19.9609	-0.384093	0.422351			19.9609	-0.09397	0.0966731
20.3523	1.43456	1.07205			20.3523	-0.365633	0.422564			20.3523	-0.0735684	0.0884471
20.7436	1.63065	1.17316			20.7436	-0.342057	0.420444			20.7436	-0.0490659	0.0799619
21.135	1.74495	1.19177			21.135	-0.315384	0.416845			21.135	-0.0264634	0.071777
21.5264	1.6825	1.11966			21.5264	-0.287746	0.412838			21.5264	-0.00931928	0.0647679
21.9178	1.41186	0.96623			21.9178	-0.260389	0.409674			21.9178	0.00201167	0.06023
22.3092	1.0658	0.757494			22.3092	-0.233779	0.40786			22.3092	0.0100982	0.0596127
22.7006	0.801922	0.531598			22.7006	-0.208015	0.40828			22.7006	0.0192151	0.0638578
23.092	0.64291	0.331829			23.092	-0.182473	0.411532			23.092	0.0335469	0.0727805
23.4834	0.560345	0.198308			23.4834	-0.155075	0.418067			23.4834	0.0553335	0.0854583
23.8748	0.559685	0.160017			23.8748	-0.122653	0.426299			23.8748	0.0835077	0.10086
24.2661	0.64016	0.228731			24.2661	-0.0832292	0.433442			24.2661	0.113259	0.118202
24.6575	0.797676	0.396131			24.6575	-0.0385468	0.436066			24.6575	0.136731	0.136909
25.0489	0.998817	0.634722			25.0489	0.00604149	0.43323			25.0489	0.144769	0.156586
25.4403	1.23229	0.902507			25.4403	0.0453107	0.426217			25.4403	0.12934	0.176926
25.8317	1.47337	1.15058			25.8317	0.0769581	0.418204			25.8317	0.0860631	0.197691
26.2231	1.6906	1.33221			26.2231	0.101955	0.411917			26.2231	0.0161813	0.218689
26.6145	1.81602	1.41178			26.6145	0.122773	0.409626			26.6145	-0.0725778	0.239742
27.0059	1.80771	1.37169			27.0059	0.142702	0.412689			27.0059	-0.166614	0.260715
27.3973	1.69445	1.21603			27.3973	0.165169	0.42164			27.3973	-0.248551	0.281463
27.7887	1.50441	0.970228			27.7887	0.192597	0.435513			27.7887	-0.300502	0.301875
28.18	1.29919	0.67661			28.18	0.22611	0.453086			28.18	-0.307865	0.321831
28.5714	1.18963	0.386807			28.5714	0.265586	0.4727			28.5714	-0.26286	0.34123
28.9628	1.20922	0.152335			28.9628	0.310025	0.493201			28.9628	-0.166988	0.359969
29.3542	1.29348	0.0151588			29.3542	0.357847	0.513354			29.3542	-0.0317942	0.377947
29.7456	1.38958	0			29.7456	0.406864	0.532119			29.7456	0.122402	0.395077
30.137	1.51129	0.109836			30.137	0.454001	0.547982			30.137	0.26968	0.41126
30.5284	1.73289	0.325421			30.5284	0.49541	0.559485			30.5284	0.383093	0.426421
30.9198	2.02155	0.608895			30.9198	0.526951	0.565091			30.9198	0.43981	0.440475
31.3112	2.37146	0.910764			31.3112	0.545981	0.564449			31.3112	0.425793	0.453355
31.7025	2.83178	1.17894			31.7025	0.551446	0.557405			31.7025	0.339058	0.465001
32.0939	3.29293	1.36809			32.0939	0.543421	0.543921			32.0939	0.190779	0.475361
32.4853	3.55177	1.44762			32.4853	0.524338	0.524972			32.4853	0.00390315	0.484401
32.8767	3.47661	1.40678			32.8767	0.499741	0.503607			32.8767	-0.19057	0.492088
33.2681	3.19791	1.25607			33.2681	0.476614	0.484433			33.2681	-0.359005	0.498415
33.6595	2.94224	1.02472			33.6595	0.459428	0.470935			33.6595	-0.471269	0.503369
34.0509	2.78595	0.754876			34.0509	0.448642	0.463772			34.0509	-0.506414	0.506961
34.4423	2.69886	0.493679			34.4423	0.442963	0.461967			34.4423	-0.456792	0.509198
34.8337	2.64567	0.284666			34.8337	0.442034	0.465426			34.8337	-0.329781	0.510102
35.2251	2.61496	0.160235			35.2251	0.446117	0.475047			35.2251	-0.146714	0.509698
35.6164	2.62072	0.13644			35.6164	0.454043	0.491187			35.6164	0.0608215	0.508011
36.0078	2.67918	0.210995			36.0078	0.461858	0.511977			36.0078	0.256659	0.505085
36.3992	2.8008	0.36472			36.3992	0.464024	0.533806			36.3992	0.406647	0.500952
36.7906	2.99334	0.565965			36.7906	0.45614	0.553189			36.7906	0.484917	0.495668
37.182	3.20452	0.777063			37.182	0.436013	0.567814			37.182	0.478622	0.489284
37.5734	3.36354	0.961477			37.5734	0.403676	0.576313			37.5734	0.390251	0.481869
37.9648	3.42802	1.09028			37.9648	0.360714	0.578005			37.9648	0.237068	0.473498
38.3562	3.40028	1.14678			38.3562	0.310264	0.572348			38.3562	0.0477807	0.464256
38.7475	3.26284	1.12859			38.7475	0.257221	0.559853			38.7475	-0.142897	0.454242
39.1389	3.0298	1.04682			39.1389	0.207379	0.542501			39.1389	-0.300769	0.443558
39.5303	2.75719	0.922917			39.5303	0.164736	0.523929			39.5303	-0.398489	0.432325
39.9217	2.50801	0.783684			39.9217	0.129673	0.507119			39.9217	-0.420515	0.420657
40.3131	2.29854	0.65584			40.3131	0.099969	0.493331			40.3131	-0.365743	0.408686
40.7045	2.08827	0.560988			40.7045	0.0737468	0.481702			40.7045	-0.24736	0.396537
41.0959	1.90698	0.512043			41.0959	0.0509356	0.472175			41.0959	-0.0899808	0.384339
41.4873	1.72055	0.511666			41.4873	0.0311476	0.465792			41.4873	0.0753247	0.372225
41.8787	1.50048	0.552839			41.8787	0.0124624	0.463822			41.8787	0.217122	0.360315
42.2701	1.30314	0.621297			42.2701	-0.0081584	0.466082			42.2701	0.309615	0.348739
42.6615	1.18681	0.699149			42.6615	-0.0331771	0.470892			42.6615	0.337412	0.337609
43.0528	1.18642	0.768874			43.0528	-0.0629793	0.475777			43.0528	0.298149	0.327045
43.4442	1.23603	0.816832			43.4442	-0.0963102	0.479213			43.4442	0.202519	0.31715
43.8356	1.26545	0.835633			43.8356	-0.131466	0.480469			43.8356	0.0717664	0.30802
44.227	1.26732	0.824977			44.227	-0.167389	0.47952			44.227	-0.0668054	0.299739
44.6184	1.1805	0.790939			44.6184	-0.202896	0.475159			44.6184	-0.18537	0.292366
45.0098	0.973965	0.743999			45.0098	-0.234749	0.465598			45.0098	-0.261058	0.285951
45.4012	0.761776	0.696354			45.4012	-0.258689	0.45011			45.4012	-0.28029	0.280499
45.7926	0.686867	0.659149			45.7926	-0.272637	0.430488			45.7926	-0.24116	0.276
46.184	0.744637	0.640228			46.184	-0.277742	0.409472			46.184	-0.153437	0.272403
46.5753	0.794678	0.642831			46.5753	-0.276726	0.389683			46.5753	-0.0362634	0.269631
46.9667	0.775825	0.665417			46.9667	-0.27256	0.373162			46.9667	0.0859218	0.267582
47.3581	0.731945	0.702523			47.3581	-0.268574	0.362222			47.3581	0.188394	0.266127
47.7495	0.704113	0.746359			47.7495	-0.268489	0.358672			47.7495	0.251049	0.265135
48.1409	0.700195	0.788682			48.1409	-0.275529	0.363105			48.1409	0.262244	0.264454
48.5323	0.734276	0.822503			48.5323	-0.291307	0.37391			48.5323	0.22084	0.263948
48.9237	0.845291	0.843252			48.9237	-0.314676	0.387763			48.9237	0.136112	0.263475
49.3151	0.996071	0.849206			49.3151	-0.34176	0.400612			49.3151	0.0255904	0.262908
49.7065	1.08322	0.841189			49.7065	-0.367066	0.409099			49.7065	-0.0886437	0.262136
50.0979	1.04251	0.821745			50.0979	-0.385249	0.411			50.0979	-0.184439	0.26105
50.4892	0.958824	0.79409			50.4892	-0.392805	0.405689			50.4892	-0.243906	0.259566
50.8806	0.946152	0.761196			50.8806	-0.389637	0.394381			50.8806	-0.256746	0.257603
51.272	0.992142	0.725263			51.272	-0.37917	0.380066			51.272	-0.221966	0.255097
51.6634	0.994041	0.687732			51.6634	-0.365549	0.36556			51.6634	-0.147686	0.251988
52.0548	0.900829	0.649772			52.0548	-0.350834	0.351933			52.0548	-0.049183	0.24823
52.4462	0.781651	0.613036			52.4462	-0.334947	0.338542			52.4462	0.0543935	0.243785
52.8376	0.714867	0.58038			52.8376	-0.318389	0.325255			52.8376	0.143892	0.23862
53.229	0.706608	0.556203			53.229	-0.303163	0.313444			53.229	0.203841	0.23272
53.6204	0.758831	0.546181			53.6204	-0.290855	0.304559			53.6204	0.225201	0.226069
54.0117	0.90081	0.556313			54.0117	-0.281464	0.298937			54.0117	0.206702	0.21867
54.4031	1.07417	0.591402			54.4031	-0.274315	0.296301			54.4031	0.154568	0.210529
54.7945	1.16562	0.653302			54.7945	-0.26858	0.296412			54.7945	0.0807803	0.201669
55.1859	1.14531	0.739381			55.1859	-0.262858	0.298589			55.1859	0.000323511	0.192117
55.5773	1.06169	0.841663			55.5773	-0.255492	0.301899			55.5773	-0.0719653	0.18191
55.9687	0.913437	0.947045			55.9687	-0.244885	0.305377			55.9687	-0.124272	0.171096
56.3601	0.758266	1.03875			56.3601	-0.229153	0.307558			56.3601	-0.149832	0.159723
56.7515	0.809055	1.09894			56.7515	-0.207687	0.30658			56.7515	-0.147756	0.147853
57.1429	1.13799	1.11201			57.1429	-0.18323	0.302646			57.1429	-0.122557	0.135546
57.5342	1.46357	1.06812			57.5342	-0.159387	0.298394			57.5342	-0.0825943	0.122874
57.9256	1.48263	0.966037			57.9256	-0.136123	0.296223			57.9256	-0.0378516	0.109915
58.317	1.26087	0.814696			58.317	-0.11014	0.294966			58.317	0.00241903	0.0967615
58.7084	1.05767	0.632982			58.7084	-0.0803455	0.291477			58.7084	0.0316403	0.0835348
59.0998	0.963604	0.447503			59.0998	-0.0503793	0.284352			59.0998	0.0470368	0.070399
59.4912	0.920647	0.288606			59.4912	-0.0248251	0.275811			59.4912	0.0497462	0.057628
59.8826	0.871876	0.185236			59.8826	-0.0044693	0.269732			59.8826	0.0439614	0.0457137
60.274	0.832043	0.159532			60.274	0.0146091	0.268679			60.274	0.0353766	0.0356894
60.6654	0.938576	0.222187			60.6654	0.0371116	0.27129			60.6654	0.0293631	0.0296087
61.0568	1.28748	0.369546			61.0568	0.0639569	0.274273			61.0568	0.029351	0.0299346
61.4481	1.74664	0.583137			61.4481	0.092592	0.275535			61.4481	0.0358246	0.0363584
61.8395	2.18892	0.831901			61.8395	0.120632	0.275063			61.8395	0.046181	0.0462403
62.2309	2.53664	1.07688			62.2309	0.146693	0.272916			62.2309	0.0554828	0.0576353
62.6223	2.79592	1.27765			62.6223	0.169421	0.268837			62.6223	0.0579107	0.0696078
63.0137	2.94332	1.39937			63.0137	0.18683	0.262205			63.0137	0.0485462	0.0817035
63.4051	2.95359	1.4192			63.4051	0.197787	0.253607			63.4051	0.0250264	0.0936828
63.7965	2.85836	1.33078			63.7965	0.203105	0.244424			63.7965	-0.0113682	0.105402
64.1879	2.65236	1.14597			64.1879	0.205444	0.236972			64.1879	-0.055504	0.116766
64.5793	2.4058	0.893343			64.5793	0.208605	0.233465			64.5793	-0.0991699	0.127713
64.9706	2.18282	0.613581			64.9706	0.214928	0.234429			64.9706	-0.132712	0.13819
65.362	2.02278	0.352618			65.362	0.22421	0.238525			65.362	-0.147189	0.148165
65.7534	1.98301	0.153646			65.7534	0.234956	0.244277			65.7534	-0.136568	0.157606
66.1448	2.11686	0.0494859			66.1448	0.245902	0.250799			66.1448	-0.0994447	0.166493
66.5362	2.31799	0.0567172			66.5362	0.255672	0.257306			66.5362	-0.0398679	0.174808
66.9276	2.42256	0.17269			66.9276	0.263296	0.263373			66.9276	0.0329997	0.182537
67.319	2.42353	0.376001			67.319	0.268921	0.269469			67.319	0.106366	0.189673
67.7104	2.59386	0.630372			67.7104	0.27343	0.276674			67.7104	0.166195	0.196209
68.1018	3.09831	0.891252			68.1018	0.275999	0.284852			68.1018	0.200026	0.202151
68.4931	3.69023	1.1139			68.4931	0.273915	0.2922			68.4931	0.19964	0.207501
68.8845	4.0637	1.26145			68.8845	0.26549	0.297285			68.8845	0.163006	0.212277
69.2759	4.12845	1.31147			69.2759	0.250869	0.299762			69.2759	0.0950496	0.216497
69.6673	4.02214	1.25974			69.6673	0.231045	0.299863			69.6673	0.00704049	0.220186
70.0587	3.78134	1.12061			70.0587	0.206629	0.297303			70.0587	-0.0853443	0.223376
70.4501	3.4513	0.923832			70.4501	0.178981	0.29155			70.4501	-0.164929	0.2261
70.8415	3.15271	0.708631			70.8415	0.150513	0.282719			70.8415	-0.216361	0.228399
71.2329	2.95439	0.515971			71.2329	0.124217	0.271436			71.2329	-0.229187	0.230307
71.6243	2.85752	0.380737			71.6243	0.102988	0.259336			71.6243	-0.200051	0.231867
72.0157	2.90306	0.325211			72.0157	0.0886968	0.248927			72.0157	-0.133544	0.233113
72.407	3.06273	0.355139			72.407	0.0807445	0.24311			72.407	-0.0415049	0.234082
72.7984	3.09695	0.459121			72.7984	0.0763845	0.243027			72.7984	0.0591202	0.23481
73.1898	2.90361	0.611378			73.1898	0.072583	0.248681			73.1898	0.14947	0.235325
73.5812	2.66325	0.777316			73.5812	0.0659764	0.259111			73.5812	0.21239	0.235661
73.9726	2.58838	0.920753			73.9726	0.053035	0.272198			73.9726	0.235768	0.235843
74.364	2.67799	1.01133			74.364	0.0315902	0.28446			74.364	0.214937	0.2359
74.7554	2.69627	1.03061			74.7554	0.00282633	0.292399			74.7554	0.153634	0.235857
75.1468	2.5174	0.975747			75.1468	-0.0283123	0.293944			75.1468	0.0633449	0.235737
75.5382	2.27737	0.85984			75.5382	-0.0560799	0.290093			75.5382	-0.0388723	0.235563
75.9296	2.16646	0.709101			75.9296	-0.0780307	0.283992			75.9296	-0.133652	0.235349
76.3209	2.22335	0.557324			76.3209	-0.0962035	0.278853			76.3209	-0.203041	0.235111
76.7123	2.22299	0.438831			76.7123	-0.113806	0.274633			76.7123	-0.233943	0.234851
77.1037	1.9951	0.381318			77.1037	-0.130271	0.268531			77.1037	-0.220624	0.234572
77.4951	1.66907	0.400053			77.4951	-0.141983	0.258759			77.4951	-0.165779	0.234264
77.8865	1.44106	0.494593			77.8865	-0.147093	0.246727			77.8865	-0.0799738	0.233915
78.2779	1.37944	0.648681			78.2779	-0.146894	0.235065			78.2779	0.0204309	0.233503
78.6693	1.42556	0.833333			78.6693	-0.143972	0.226252			78.6693	0.116452	0.233003
79.0607	1.56782	1.01251			79.0607	-0.141216	0.222459			79.0607	0.190125	0.232391
79.4521	1.77779	1.15021			79.4521	-0.142391	0.225717			79.4521	0.22791	0.231634
79.8434	1.97243	1.21763			79.8434	-0.150636	0.23546			79.8434	0.223197	0.230708
80.2348	2.12248	1.19885			80.2348	-0.166449	0.248921			80.2348	0.17745	0.229582
80.6262	2.13607	1.09411			80.6262	-0.188245	0.262962			80.6262	0.0997823	0.228233
81.0176	1.81924	0.919866			81.0176	-0.212769	0.274638			81.0176	0.00508717	0.226638
81.409	1.24414	0.705772			81.409	-0.234863	0.28107			81.409	-0.0888967	0.224776
81.8004	0.702507	0.489102			81.8004	-0.250158	0.281461			81.8004	-0.164988	0.222629
82.1918	0.354965	0.307804			82.1918	-0.257656	0.277025			82.1918	-0.20977	0.220176
82.5832	0.2131	0.193487			82.5832	-0.258655	0.269531			82.5832	-0.215993	0.217406
82.9746	0.338318	0.165716			82.9746	-0.25464	0.260005			82.9746	-0.183733	0.214298
83.3659	0.740452	0.228672			83.3659	-0.247393	0.249644			83.3659	-0.120121	0.210841
83.7573	1.15686	0.370741			83.7573	-0.239213	0.23991			83.7573	-0.0377526	0.207018
84.1487	1.38928	0.567051			84.1487	-0.23122	0.231299			84.1487	0.0478751	0.202821
84.5401	1.4846	0.784346			84.5401	-0.223438	0.223474			84.5401	0.121372	0.198239
84.9315	1.60948	0.987202			84.9315	-0.216158	0.216477			84.9315	0.170304	0.193268
85.3229	1.7557	1.14434			85.3229	-0.210801	0.211483			85.3229	0.18735	0.187909
85.7143	1.88199	1.23385			85.7143	-0.20852	0.209607			85.7143	0.171381	0.182164
86.1057	1.99471	1.24634			86.1057	-0.209473	0.211152			86.1057	0.127312	0.176046
86.4971	2.06197	1.18567			86.4971	-0.212924	0.215727			86.4971	0.0648153	0.169568
86.8885	1.97673	1.06709			86.8885	-0.217171	0.222216			86.8885	-0.00379135	0.162749
87.2798	1.68844	0.913535			87.2798	-0.219482	0.228739			87.2798	-0.0660218	0.155612
87.6712	1.35358	0.75081			87.6712	-0.216905	0.233028			87.6712	-0.111563	0.14818
88.0626	1.12475	0.602788			88.0626	-0.208244	0.233771			88.0626	-0.134032	0.140483
88.454	1.02747	0.487521			88.454	-0.194379	0.230977			88.454	-0.131844	0.132544
88.8454	1.02079	0.41499			88.8454	-0.177278	0.225379			88.8454	-0.108077	0.124395
89.2368	1.12641	0.386775			89.2368	-0.159139	0.218074			89.2368	-0.0694514	0.116058
89.6282	1.2731	0.397477			89.6282	-0.142	0.210557			89.6282	-0.0246705	0.107566
90.0196	1.31742	0.437368			90.0196	-0.12635	0.204198			90.0196	0.0174722	0.0989428
90.411	1.24885	0.495507			90.411	-0.110825	0.198741			90.411	0.0498263	0.0902193
90.8024	1.17663	0.562495			90.8024	-0.0942261	0.192898			90.8024	0.0681134	0.0814266
91.1937	1.1527	0.632228			91.1937	-0.0771185	0.185742			91.1937	0.0714402	0.0725945
91.5851	1.17585	0.702283			91.5851	-0.0610152	0.177661			91.5851	0.0620504	0.0637613
91.9765	1.29835	0.772956			91.9765	-0.0469962	0.169473			91.9765	0.0444357	0.05496
92.3679	1.5132	0.845346			92.3679	-0.0352619	0.162242			92.3679	0.0240546	0.0462342
92.7593	1.73266	0.919111			92.7593	-0.0249948	0.156511			92.7593	0.00597505	0.0376243
93.1507	1.89091	0.99065			93.1507	-0.0150201	0.152215			93.1507	-0.00624856	0.0291823
93.5421	1.97635	1.05232			93.5421	-0.00452448	0.148752			93.5421	-0.0112298	0.0209765
93.9335	2.0351	1.09308			93.9335	0.00678633	0.145567			93.9335	-0.00982029	0.0131493
94.3248	2.0561	1.10054			94.3248	0.0187746	0.142168			94.3248	-0.00462409	0.00636232
94.7162	2.04384	1.06404			94.7162	0.0312765	0.138107			94.7162	0.000891635	0.00558713
95.1076	2.03916	0.978029			95.1076	0.0431426	0.132284			95.1076	0.00344861	0.0115072
95.499	2.0441	0.844904			95.499	0.0520782	0.12427			95.499	0.00090632	0.0181811
95.8904	1.94051	0.676484			95.8904	0.0563357	0.115018			95.8904	-0.00712313	0.0247294
96.2818	1.6363	0.493552			96.2818	0.0571514	0.107454			96.2818	-0.0191375	0.0310018
96.6732	1.30585	0.323302			96.6732	0.0583385	0.10375			96.6732	-0.0321088	0.0369464
97.0646	1.21046	0.194989			97.0646	0.0625123	0.103357			97.0646	-0.0422545	0.0425323
97.456	1.36927	0.134532			97.456	0.0692484	0.103995			97.456	-0.0460226	0.047743
97.8474	1.65891	0.159121			97.8474	0.0769418	0.104506			97.8474	-0.0410517	0.0525585
98.2387	2.04242	0.272952			98.2387	0.0844898	0.104504			98.2387	-0.0268705	0.0569693
98.6301	2.44411	0.465102			98.6301	0.0909154	0.103879			98.6301	-0.005165	0.0609607
99.0215	2.79081	0.710146			99.0215	0.0955911	0.102644			99.0215	0.0204581	0.0645263
99.4129	3.00734	0.971612			99.4129	0.098146	0.100972			99.4129	0.0451691	0.0676597
99.8043	3.19844	1.2078			99.8043	0.0987925	0.0992628			99.8043	0.0639231	0.0703582
100.196	3.46574	1.37897			100.196	0.0974627	0.0975777			100.196	0.0725564	0.0726268
100.587	3.71299	1.45454			100.587	0.0937793	0.0956934			100.587	0.0687282	0.0744687
100.978	3.83536	1.41903			100.978	0.0876822	0.0936359			100.978	0.0524956	0.0758991
101.37	3.77804	1.27534			101.37	0.0788549	0.0911064			101.37	0.026391	0.0769288
101.761	3.6456	1.04492			101.761	0.0671933	0.0875733			101.761	-0.0050229	0.0775791
102.153	3.51165	0.764398			102.153	0.0534424	0.0825642			102.153	-0.0360317	0.0778677
102.544	3.36448	0.479459			102.544	0.0397609	0.076105			102.544	-0.0608987	0.0778164
102.935	3.16919	0.236895			102.935	0.0285852	0.069129			102.935	-0.075009	0.0774475
103.327	2.94091	0.0763587			103.327	0.0212373	0.062778			103.327	-0.0757905	0.0767793
103.718	2.75727	0.0233547			103.718	0.0175391	0.0582881			103.718	-0.0632206	0.0758361
104.11	2.69698	0.0847614			104.11	0.0164339	0.0563054			104.11	-0.0398165	0.0746335
104.501	2.78776	0.247755			104.501	0.0164349	0.0571893			104.501	-0.0101157	0.0731956
104.892	2.9552	0.48232			104.892	0.0160177	0.0602043			104.892	0.0202415	0.07154
105.284	3.15649	0.746861			105.284	0.0143999	0.0647231			105.284	0.0456335	0.0696911
105.675	3.33632	0.995855			105.675	0.0109206	0.0701894			105.675	0.0615534	0.0676735
106.067	3.46405	1.18806			106.067	0.00512308	0.0761637			106.067	0.0654553	0.0655131
106.458	3.5425	1.29379			106.458	-0.00313605	0.0821333			106.458	0.0571879	0.0632439
106.849	3.53667	1.2998			106.849	-0.0137309	0.0878054			106.849	0.0389385	0.0608946
107.241	3.3361	1.21108			107.241	-0.0261551	0.0925685			107.241	0.0147128	0.0585044
107.632	3.00078	1.04917			107.632	-0.0391782	0.0960508			107.632	-0.0105276	0.0561043
108.023	2.70913	0.847422			108.023	-0.0516448	0.0981613			108.023	-0.0318845	0.0537304
108.415	2.56031	0.644337			108.415	-0.062711	0.0989549			108.415	-0.0454864	0.0514121
108.806	2.4414	0.476132			108.806	-0.071666	0.0982368			108.806	-0.0492033	0.0491744
109.198	2.17576	0.37014			109.198	-0.0774036	0.0954604			109.198	-0.0429789	0.0470406
109.589	1.86985	0.340205			109.589	-0.0785324	0.0901287			109.589	-0.0287286	0.0450207
109.98	1.73121	0.384888			109.98	-0.0753921	0.0832081			109.98	-0.0098467	0.0431287
110.372	1.89396	0.488724			110.372	-0.0703677	0.0768352			110.372	0.00956052	0.0413645
110.763	2.18162	0.626132			110.763	-0.066999	0.0738414			110.763	0.0255437	0.0397321
111.155	2.35756	0.767081			111.155	-0.0671151	0.0747788			111.155	0.0350987	0.038229
111.546	2.39481	0.883307			111.546	-0.0701595	0.0781753			111.546	0.0367183	0.0368515
111.937	2.37406	0.953816			111.937	-0.0749728	0.082569			111.937	0.0306045	0.035599
112.329	2.31053	0.968598			112.329	-0.0809395	0.0874769			112.329	0.0185201	0.0344613
112.72	2.21555	0.929905			112.72	-0.0874135	0.0923193			112.72	0.00332863	0.0334356
113.112	2.06251	0.850952			113.112	-0.0935187	0.0965885			113.112	-0.0116622	0.0325056
113.503	1.82966	0.752444			113.503	-0.0982483	0.0996556			113.503	-0.0234069	0.0316581
113.894	1.61885	0.657758			113.894	-0.100856	0.101214			113.894	-0.0297276	0.0308713
114.286	1.61206	0.587848			114.286	-0.10156	0.101561			114.286	-0.0296999	0.0301188
114.677	1.7926	0.556943			114.677	-0.101699	0.101867			114.677	-0.0237537	0.0293771
115.069	1.91929	0.5699			115.069	-0.102288	0.103045			115.069	-0.0134862	0.0286132
115.46	1.91014	0.621689			115.46	-0.102201	0.104203			115.46	-0.00124658	0.0278078
115.851	1.89063	0.699004			115.851	-0.0997608	0.103777			115.851	0.0104035	0.026934
116.243	1.99123	0.783564			116.243	-0.0950022	0.101226			116.243	0.0192323	0.0259802
116.634	2.17742	0.856308			116.634	-0.0901776	0.0979542			116.634	0.0237679	0.0249358
117.025	2.29328	0.90156			117.025	-0.087494	0.0960841			117.025	0.0235333	0.0237974
117.417	2.21805	0.910259			117.417	-0.087071	0.096544			117.417	0.0190527	0.0225716
117.808	2.03858	0.881608			117.808	-0.0874936	0.0984768			117.808	0.011646	0.0212607
118.2	1.89358	0.822864			118.2	-0.0877962	0.101038			118.2	0.00307342	0.0198818
118.591	1.79804	0.747389			118.591	-0.0876658	0.103966			118.591	-0.00487961	0.0184394
118.982	1.70671	0.671477			118.982	-0.0865459	0.106994			118.982	-0.0107814	0.01695
119.374	1.63832	0.610688			119.374	-0.0838588	0.109523			119.374	-0.0138177	0.0154186
119.765	1.62266	0.576526			119.765	-0.079432	0.111208			119.765	-0.0138906	0.0138527
120.157	1.63744	0.574164			120.157	-0.0735523	0.111776			120.157	-0.0115482	0.0122588
120.548	1.72727	0.601677			120.548	-0.0670307	0.111386			120.548	-0.00777408	0.0106352
120.939	1.82157	0.650876			120.939	-0.0613078	0.110974			120.939	-0.00370115	0.00899259
121.331	1.73586	0.709504			121.331	-0.0564514	0.112143			121.331	-0.000321236	0.00732896
121.722	1.51533	0.764222			121.722	-0.0502733	0.114303			121.722	0.00173861	0.00566463
122.114	1.38479	0.803701			122.114	-0.0413838	0.115593			122.114	0.00232621	0.00401744
122.505	1.43214	0.821096			122.505	-0.031035	0.114878			122.505	0.00174322	0.00246272
122.896	1.56781	0.815372			122.896	-0.0210313	0.113075			122.896	0.000608793	0.00133787
123.288	1.76111	0.791212			123.288	-0.0117885	0.110687			123.288	-0.000349289	0.00174994
123.679	1.95294	0.757576			123.679	-0.00365623	0.108132			123.679	-0.000518062	0.00305341
124.07	2.07906	0.725283			124.07	0.00326169	0.105908			124.07	0.000420856	0.00445595
124.462	2.10266	0.704207			124.462	0.00965888	0.104848			124.462	0.00239952	0.00579889
124.853	2.07494	0.700763			124.853	0.0168219	0.104757			124.853	0.00498024	0.00704767
125.245	2.13652	0.716267			125.245	0.0252511	0.104862			125.245	0.00747288	0.00817615
125.636	2.32035	0.746554			125.636	0.0343317	0.104244			125.636	0.00912012	0.00917838
126.027	2.51656	0.782953			126.027	0.0432519	0.102751			126.027	0.00930219	0.0100546
126.419	2.5964	0.814384			126.419	0.0509938	0.100017			126.419	0.00770859	0.0108024
126.81	2.57257	0.830099			126.81	0.0570154	0.0967428			126.81	0.00443395	0.01144
127.202	2.61226	0.822429			127.202	0.0618863	0.0933798			127.202	-2.55891e-05	0.0119622
127.593	2.78462	0.7889			127.593	0.0657686	0.0898786			127.593	-0.00487403	0.0123914
127.984	3.03116	0.73321			127.984	0.0681596	0.0856505			127.984	-0.0091903	0.0127174
128.376	3.19981	0.66481			128.376	0.068349	0.0806183			128.376	-0.0121336	0.0129505
128.767	3.12737	0.597156			128.767	0.0670446	0.0757862			128.767	-0.0131306	0.0130789
129.159	3.04083	0.544965			129.159	0.0663486	0.0725773			129.159	-0.0120002	0.0130908
129.55	2.97077	0.521069			129.55	0.0659795	0.0699103			129.55	-0.00898818	0.0129815
129.941	2.90271	0.53353			129.941	0.0653963	0.0675283			129.941	-0.00470508	0.0127206
130.333	2.93922	0.583642			130.333	0.0645602	0.0653106			130.333	1.60469e-05	0.012318
130.724	3.13201	0.665286			130.724	0.0627325	0.0627788			130.724	0.00430678	0.0117398
131.115	3.33618	0.765774			131.115	0.0588797	0.0591288			131.115	0.00745078	0.0110114
131.507	3.41459	0.868072			131.507	0.0532285	0.0544439			131.507	0.00902808	0.0101153
131.898	3.40194	0.953956			131.898	0.0474316	0.0499709			131.898	0.00898412	0.00908326
132.29	3.36582	1.00747			132.29	0.0422483	0.046294			132.29	0.00761051	0.00793345
132.681	3.36369	1.01802			132.681	0.0370449	0.0433289			132.681	0.00544576	0.00668829
133.072	3.36206	0.982455			133.072	0.0310244	0.040101			133.072	0.00312333	0.00541717
133.464	3.28255	0.905758			133.464	0.0238706	0.036727			133.464	0.001206	0.00411442
133.855	3.14301	0.800195			133.855	0.015826	0.0321442			133.855	4.79961e-05	0.00292481
134.144	2.96262	0.683097			134.144	0.00746248	0.0275305			134.144	-0.000281734	0.00181166
