# Supplementary material for: Deciphering the actin structure-dependent preferential cooperative binding of cofilin
Source: eLife. 2024 Aug 2;13:RP95257. doi: 10.7554/eLife.95257 (PMC11296705; doi:10.7554/eLife.95257)
Supplement: Figure 4—figure supplement 2—source data 1. — These data are presented as origin plots in Figure 4—figure supplement 2A–B. [file elife-95257-fig4-figsupp2-data1.xlsx]

## Sheet: Figure 4-figure supplement 2
Figure 4-figure supplement 2A (F1)	Distance(nm)	ACF1	ACF2	ACF3	ACF4	ACF5	ACF6	ACF7	ACF8	ACF9	ACF10	ACF11	ACF12	ACF13	ACF14	ACF15	ACF16	ACF17	ACF18	ACF19	ACF20	ACF21	ACF22	ACF23	ACF24	ACF25	ACF26	ACF27	ACF28	ACF29	ACF30	ACF31	ACF32	ACF33	ACF34	ACF35	ACF36	ACF37	ACF38	ACF39	ACF40	ACF41	ACF42	ACF43	ACF44	ACF45	ACF46	ACF47	ACF48
	0	1.00005	1.00005	1	1.00001	1	1.00002	1.00003	1	1	1.00003	1.00001	1.00001	1	1	1.00004	1	1	1.00001	1.00001	1.00002	1.00003	1.00002	1.00002	1	1.00001	1	1.00002	1.00001	1.00002	1	1.00001	1.00001	1	1.00006	1	1.00004	1.00001	1.00001	1	1	1.00002	1	1	1.00005	1	1.00001	1.00002	1.00001
	0.408163	0.997741	0.998165	0.998582	0.999083	0.998883	0.998774	0.999105	0.999456	0.99874	0.99715	0.998876	0.999651	0.997899	0.998414	0.998429	0.99896	0.999302	0.997746	0.999122	0.998394	0.99809	0.999254	0.998579	0.999057	0.999518	0.998353	0.998841	0.999289	0.998367	0.999398	0.998781	0.998066	0.998958	0.998749	0.997886	0.998892	0.999077	0.997479	0.998852	0.99901	0.999048	0.998215	0.999167	0.999101	0.999046	0.999228	0.998417	0.999006
	0.816327	0.993555	0.994534	0.994957	0.996949	0.996315	0.996161	0.997097	0.99806	0.995969	0.992503	0.996205	0.998632	0.994428	0.994141	0.995267	0.996658	0.997939	0.993242	0.996845	0.994878	0.994109	0.99724	0.996213	0.997626	0.99812	0.994088	0.995818	0.997269	0.995013	0.997694	0.99595	0.99407	0.996492	0.99562	0.99459	0.995882	0.996674	0.993431	0.996765	0.997142	0.996662	0.995098	0.997331	0.996645	0.996947	0.997363	0.995827	0.996799
	1.22449	0.988399	0.989857	0.989587	0.993865	0.992542	0.992577	0.994318	0.995935	0.992014	0.987339	0.992303	0.996998	0.990414	0.987759	0.991151	0.993377	0.996145	0.987183	0.993352	0.989935	0.988714	0.994159	0.993512	0.996118	0.995894	0.987535	0.991326	0.994022	0.990479	0.994976	0.991906	0.988614	0.992841	0.991099	0.990973	0.991306	0.993117	0.988907	0.994142	0.994715	0.993099	0.991287	0.994701	0.992991	0.993944	0.994643	0.992917	0.993731
	1.63265	0.981343	0.983543	0.982597	0.989691	0.987274	0.987682	0.990592	0.993052	0.986518	0.980167	0.986977	0.994779	0.984776	0.979654	0.985618	0.988857	0.993673	0.978717	0.988593	0.983122	0.981311	0.990035	0.989768	0.993962	0.992882	0.97859	0.985468	0.989557	0.984213	0.991277	0.986489	0.981096	0.987798	0.985127	0.985788	0.985236	0.988532	0.982531	0.99048	0.991308	0.98826	0.985913	0.991045	0.98825	0.989761	0.991022	0.988884	0.989645
	2.04082	0.973387	0.976357	0.974427	0.984708	0.980797	0.981913	0.986246	0.989535	0.979845	0.972353	0.980541	0.99203	0.978467	0.970341	0.97931	0.983405	0.990786	0.968638	0.982753	0.974946	0.972586	0.98505	0.985629	0.991603	0.989165	0.967601	0.978593	0.983966	0.976793	0.986689	0.980099	0.972188	0.981623	0.978126	0.980006	0.977969	0.983202	0.975455	0.986239	0.98728	0.982401	0.979713	0.986594	0.98271	0.984672	0.986732	0.984475	0.984894
	2.44898	0.964176	0.968086	0.965272	0.978902	0.973012	0.975154	0.981248	0.985398	0.971855	0.963241	0.972956	0.98879	0.971004	0.960205	0.97208	0.976934	0.987382	0.956592	0.975855	0.965242	0.962315	0.979273	0.980778	0.988774	0.984802	0.95461	0.970858	0.977297	0.968006	0.981268	0.972733	0.961678	0.974253	0.970156	0.97304	0.969638	0.977279	0.967062	0.981201	0.982441	0.975527	0.972284	0.981254	0.976516	0.978566	0.981801	0.979329	0.979465
	2.85714	0.954119	0.95909	0.955441	0.972425	0.964058	0.967614	0.975763	0.98072	0.962706	0.953358	0.964372	0.985106	0.962765	0.949633	0.964224	0.969594	0.983577	0.942928	0.968014	0.954246	0.950827	0.972825	0.97546	0.98562	0.979864	0.939822	0.962502	0.969631	0.958092	0.975087	0.964612	0.949884	0.965815	0.961471	0.965228	0.960451	0.970952	0.957745	0.975552	0.976933	0.967794	0.963921	0.975129	0.969867	0.971575	0.976368	0.973746	0.973546
	3.26531	0.943367	0.94949	0.945132	0.965356	0.954018	0.959378	0.969868	0.975551	0.952458	0.942837	0.954875	0.981016	0.953834	0.938894	0.955866	0.961465	0.979408	0.92777	0.959312	0.942049	0.938246	0.965786	0.969734	0.982171	0.974414	0.923383	0.953682	0.961045	0.947144	0.968206	0.955853	0.936959	0.956376	0.952204	0.956624	0.950548	0.964351	0.947606	0.969343	0.970793	0.959297	0.954681	0.968268	0.962893	0.963749	0.970514	0.967785	0.967234
	3.67347	0.931821	0.939269	0.934457	0.957719	0.942921	0.950449	0.963568	0.969925	0.941099	0.93151	0.944469	0.976544	0.944106	0.928128	0.94699	0.952568	0.974861	0.911104	0.949798	0.928655	0.924586	0.958198	0.963517	0.978341	0.968501	0.90536	0.944483	0.951607	0.935116	0.960672	0.946488	0.92293	0.945951	0.942408	0.947067	0.940006	0.957537	0.936444	0.962536	0.963992	0.950091	0.944493	0.960677	0.955658	0.9551	0.964271	0.961361	0.960551
	4.08163	0.91983	0.928679	0.923529	0.949614	0.930947	0.940994	0.956963	0.963899	0.928783	0.919879	0.933279	0.971714	0.933937	0.917396	0.937818	0.943064	0.970032	0.893298	0.93957	0.914272	0.91014	0.950117	0.957047	0.974302	0.962178	0.885915	0.934994	0.941406	0.922227	0.952531	0.936655	0.908123	0.934662	0.932195	0.936936	0.928911	0.950566	0.924693	0.955313	0.956686	0.9403	0.933653	0.952478	0.948223	0.945768	0.957718	0.954731	0.953619
	4.4898	0.907118	0.917535	0.912307	0.941002	0.918104	0.930931	0.949978	0.957479	0.915441	0.90755	0.921257	0.966534	0.923056	0.906619	0.928205	0.93294	0.964858	0.874233	0.928647	0.898815	0.894805	0.941532	0.950138	0.969912	0.955477	0.865056	0.925184	0.930508	0.908336	0.943806	0.926287	0.892478	0.922486	0.92149	0.925929	0.917247	0.943406	0.911991	0.947559	0.948796	0.929934	0.921976	0.943655	0.94055	0.935728	0.950826	0.947671	0.946376
	4.89796	0.893936	0.906029	0.900808	0.931949	0.904571	0.920394	0.942673	0.950711	0.901208	0.894938	0.908494	0.961015	0.91177	0.895704	0.91831	0.922347	0.959418	0.854269	0.917115	0.882469	0.878849	0.932467	0.94299	0.965314	0.948439	0.842913	0.91507	0.919004	0.893616	0.934531	0.915467	0.876295	0.909531	0.910336	0.914384	0.90504	0.936047	0.898685	0.939437	0.940471	0.9191	0.90974	0.934327	0.932637	0.925118	0.943637	0.940396	0.938902
	5.30612	0.880151	0.894041	0.888957	0.922431	0.890413	0.909343	0.934994	0.943603	0.886072	0.881851	0.89499	0.955163	0.899942	0.884509	0.908055	0.911319	0.953679	0.833417	0.905008	0.865209	0.862252	0.922913	0.935514	0.960448	0.941094	0.819534	0.9046	0.90697	0.878009	0.924725	0.904149	0.859612	0.895808	0.898655	0.902171	0.89226	0.928442	0.884622	0.930899	0.931694	0.907827	0.89687	0.924516	0.92443	0.913953	0.936125	0.932776	0.931159
	5.71429	0.865807	0.881626	0.87673	0.912474	0.875752	0.897833	0.92695	0.936184	0.870092	0.86839	0.88079	0.948986	0.88766	0.872932	0.897481	0.899947	0.947665	0.811888	0.892393	0.847126	0.845164	0.912883	0.92776	0.955342	0.933483	0.795016	0.893766	0.894497	0.861569	0.914416	0.892353	0.842605	0.881382	0.886439	0.889383	0.878913	0.920573	0.869864	0.922004	0.922531	0.896195	0.883484	0.914296	0.915911	0.90232	0.928302	0.924859	0.923173
	6.12245	0.85103	0.86885	0.864129	0.902116	0.860728	0.885927	0.918566	0.928483	0.853351	0.854712	0.865977	0.942502	0.875031	0.860926	0.886667	0.888339	0.941405	0.789912	0.879344	0.828321	0.827732	0.90241	0.919807	0.950055	0.92565	0.769502	0.882579	0.881679	0.844392	0.903639	0.880121	0.825474	0.866328	0.873694	0.876152	0.865028	0.912447	0.854567	0.912823	0.913061	0.884289	0.8697	0.903743	0.907084	0.890301	0.920186	0.916706	0.914989
	6.53061	0.835739	0.85568	0.851168	0.891367	0.845414	0.873625	0.909834	0.920517	0.835856	0.840675	0.850582	0.935731	0.861969	0.848497	0.875589	0.876543	0.934883	0.767578	0.865922	0.808816	0.810009	0.891525	0.911586	0.94452	0.917643	0.743099	0.871061	0.868606	0.826454	0.892431	0.867455	0.808294	0.850681	0.860419	0.862368	0.850639	0.904081	0.838586	0.903334	0.90328	0.872177	0.855493	0.892889	0.897966	0.877933	0.911787	0.908233	0.906614
	6.93878	0.820217	0.842324	0.837952	0.880319	0.829982	0.861063	0.900844	0.912336	0.817744	0.826633	0.834746	0.928704	0.848727	0.83575	0.86443	0.864703	0.928172	0.745254	0.852235	0.788797	0.792261	0.880304	0.903266	0.93885	0.909523	0.716021	0.859306	0.855385	0.807942	0.880846	0.854473	0.791356	0.834564	0.846715	0.848301	0.835849	0.895554	0.822232	0.893676	0.893316	0.859993	0.841099	0.881838	0.888633	0.865338	0.903171	0.899624	0.898161
	7.34694	0.804414	0.828766	0.824567	0.869001	0.814502	0.848244	0.891612	0.903959	0.79903	0.812428	0.818528	0.921453	0.835205	0.822815	0.85319	0.852863	0.921255	0.723024	0.838353	0.768289	0.774534	0.868807	0.894773	0.932974	0.901348	0.688424	0.847387	0.842109	0.788852	0.868933	0.841206	0.774722	0.818017	0.832623	0.833817	0.820738	0.886933	0.80537	0.883821	0.883157	0.847812	0.826469	0.870613	0.879151	0.852542	0.894366	0.890787	0.889659
	7.7551	0.788568	0.815224	0.811177	0.85751	0.799124	0.835301	0.882237	0.895436	0.779839	0.798347	0.802061	0.914018	0.821621	0.809878	0.842042	0.841153	0.9142	0.701252	0.824387	0.747476	0.757088	0.857122	0.88624	0.926969	0.893181	0.660536	0.835436	0.828883	0.769351	0.856754	0.827783	0.758648	0.801161	0.818282	0.819126	0.805439	0.878322	0.788235	0.873889	0.872914	0.835774	0.811819	0.859305	0.869627	0.839659	0.885454	0.881886	0.881229
	8.16327	0.772757	0.801763	0.797911	0.845905	0.783944	0.822278	0.872771	0.886797	0.760231	0.784392	0.785445	0.906436	0.807991	0.797114	0.831053	0.829644	0.907022	0.680114	0.810421	0.726441	0.740031	0.845326	0.877673	0.920829	0.885083	0.632561	0.823555	0.815799	0.749513	0.844363	0.814277	0.743249	0.784071	0.803773	0.804233	0.79006	0.869809	0.770863	0.863907	0.862617	0.823973	0.797185	0.847959	0.860145	0.826737	0.876486	0.872922	0.872935
	8.57143	0.757051	0.788499	0.784909	0.834246	0.76906	0.80924	0.863272	0.878072	0.740277	0.770619	0.768767	0.898742	0.794379	0.784675	0.820301	0.818411	0.899748	0.659862	0.79654	0.705299	0.723524	0.833484	0.869095	0.91455	0.877107	0.604698	0.811845	0.802943	0.729416	0.831812	0.800766	0.728657	0.766833	0.789196	0.789179	0.774705	0.861471	0.753295	0.853922	0.852317	0.812512	0.782669	0.836626	0.850781	0.813844	0.86752	0.863943	0.864848
	8.97959	0.741622	0.775565	0.772287	0.822602	0.754591	0.796268	0.853808	0.869291	0.720082	0.757198	0.75215	0.890968	0.780923	0.772674	0.809898	0.807548	0.892422	0.64077	0.782832	0.68419	0.707736	0.821662	0.860594	0.908194	0.8693	0.577175	0.800393	0.790396	0.7092	0.819149	0.787336	0.715028	0.74955	0.77464	0.77412	0.759468	0.853371	0.735733	0.844018	0.842095	0.801489	0.768413	0.825377	0.841597	0.801059	0.858612	0.855046	0.85705
	9.38776	0.726398	0.762957	0.760104	0.810987	0.740588	0.783354	0.844383	0.860466	0.69967	0.743987	0.735643	0.883135	0.767551	0.761152	0.799823	0.79708	0.88503	0.622966	0.769347	0.663161	0.692715	0.809893	0.852103	0.901705	0.861694	0.55016	0.789232	0.77822	0.688869	0.806406	0.773997	0.70237	0.732273	0.76013	0.758975	0.744393	0.845531	0.718086	0.834177	0.831954	0.790956	0.754413	0.814231	0.832608	0.788405	0.849778	0.846171	0.849549
	9.79592	0.711539	0.750808	0.748418	0.799453	0.727163	0.770575	0.83505	0.851615	0.67915	0.731188	0.719356	0.875265	0.754427	0.750116	0.790172	0.787095	0.877618	0.606742	0.756155	0.642365	0.678631	0.798215	0.843726	0.895158	0.854315	0.523875	0.778398	0.766477	0.668569	0.793614	0.760808	0.690816	0.715108	0.745722	0.743945	0.729529	0.837968	0.700587	0.824495	0.821988	0.780991	0.740849	0.803259	0.823827	0.775967	0.841055	0.837442	0.842407
	10.2041	0.696959	0.739059	0.73721	0.787988	0.714344	0.757893	0.82579	0.842734	0.658541	0.718629	0.703337	0.867369	0.741451	0.739509	0.78089	0.777594	0.870162	0.592153	0.743285	0.621826	0.665468	0.786638	0.83539	0.88851	0.847175	0.498487	0.767869	0.755203	0.648301	0.780787	0.74774	0.680305	0.698097	0.731388	0.728953	0.714874	0.830661	0.683165	0.814943	0.812192	0.771607	0.72769	0.792473	0.815225	0.763749	0.832432	0.828774	0.835605
	10.6122	0.682718	0.72778	0.726473	0.77661	0.702196	0.745344	0.816622	0.833826	0.637921	0.706392	0.687667	0.859459	0.728705	0.729265	0.772011	0.768622	0.862682	0.579398	0.73078	0.601664	0.653331	0.775176	0.82714	0.881788	0.840281	0.474199	0.757636	0.744433	0.628159	0.76794	0.734806	0.670877	0.681324	0.717144	0.714119	0.700435	0.823595	0.665951	0.805576	0.80263	0.762843	0.715063	0.78192	0.806777	0.75181	0.823916	0.820233	0.829163
	11.0204	0.668826	0.716944	0.716162	0.765316	0.690749	0.732913	0.807544	0.824885	0.61734	0.694428	0.672421	0.851543	0.716167	0.719311	0.763517	0.760189	0.85517	0.56851	0.71866	0.581935	0.642203	0.763839	0.818967	0.875003	0.833631	0.451204	0.747666	0.734186	0.608205	0.75508	0.721983	0.66247	0.664848	0.702961	0.699469	0.686201	0.816747	0.649007	0.796402	0.793322	0.754699	0.702988	0.771621	0.79845	0.740162	0.815495	0.811796	0.823075
	11.4286	0.655241	0.706541	0.706237	0.754099	0.680006	0.720586	0.798551	0.815901	0.596834	0.682654	0.657657	0.843631	0.703796	0.709587	0.755378	0.752289	0.847615	0.559525	0.706941	0.562709	0.632086	0.752634	0.810837	0.868126	0.82722	0.429688	0.737929	0.72447	0.588476	0.742212	0.709248	0.655006	0.648722	0.688829	0.684993	0.672162	0.810097	0.63233	0.787418	0.784283	0.747172	0.691489	0.761587	0.790214	0.72882	0.807156	0.803441	0.817328
	11.8367	0.642072	0.696614	0.696676	0.742978	0.669994	0.70839	0.789672	0.806875	0.576487	0.67116	0.643475	0.835735	0.691666	0.700073	0.747636	0.744938	0.840034	0.552462	0.695644	0.54409	0.622994	0.741583	0.802805	0.861209	0.82104	0.409863	0.728421	0.715286	0.569094	0.729346	0.696611	0.648444	0.633028	0.674764	0.67082	0.658329	0.80365	0.616102	0.778677	0.775562	0.740262	0.680652	0.751851	0.782064	0.717813	0.798904	0.795228	0.811945
	12.2449	0.629249	0.687108	0.687449	0.73194	0.66067	0.696286	0.780899	0.797794	0.556314	0.659779	0.629926	0.827867	0.679672	0.690771	0.740236	0.738097	0.832403	0.547194	0.684768	0.526115	0.614844	0.7307	0.794801	0.854201	0.815082	0.391893	0.719125	0.706623	0.550079	0.716486	0.68404	0.642626	0.617802	0.660758	0.656866	0.644701	0.797406	0.600262	0.770143	0.767136	0.733934	0.670426	0.742397	0.773989	0.707122	0.790723	0.787087	0.806907
	12.6531	0.616895	0.678106	0.678572	0.721017	0.652037	0.684319	0.772278	0.788664	0.536403	0.648637	0.617108	0.820044	0.667913	0.681728	0.73324	0.731773	0.824747	0.543694	0.674328	0.508916	0.607655	0.720014	0.786891	0.847148	0.809336	0.375962	0.710068	0.698466	0.531564	0.703646	0.671569	0.637509	0.603129	0.646867	0.643271	0.631312	0.791393	0.585006	0.761877	0.759056	0.728183	0.660909	0.733251	0.766012	0.696776	0.782633	0.779109	0.80225
	13.0612	0.604983	0.669558	0.670044	0.710209	0.644036	0.672461	0.763818	0.779477	0.516779	0.637609	0.605076	0.812281	0.656309	0.672998	0.726614	0.725918	0.817048	0.541736	0.664315	0.492533	0.601309	0.709543	0.779027	0.840027	0.803789	0.362187	0.701255	0.690787	0.513593	0.690835	0.659185	0.63292	0.589048	0.633108	0.629981	0.61818	0.785632	0.570323	0.753853	0.751297	0.722962	0.652038	0.724392	0.758142	0.686743	0.77463	0.771243	0.797967
	13.4694	0.593553	0.66152	0.661898	0.699534	0.636628	0.660732	0.755547	0.770239	0.497498	0.626729	0.593892	0.804592	0.644897	0.664644	0.720382	0.720511	0.809319	0.541206	0.654728	0.477081	0.595784	0.699307	0.771226	0.832839	0.798426	0.35066	0.692717	0.683557	0.496258	0.678062	0.646907	0.628771	0.575623	0.619537	0.617054	0.605337	0.780148	0.556315	0.746099	0.743877	0.718241	0.643857	0.715824	0.750401	0.67703	0.76673	0.763538	0.794076
	13.8775	0.582645	0.653979	0.654148	0.689004	0.629758	0.649133	0.747488	0.760951	0.478605	0.615984	0.583611	0.79699	0.633676	0.656718	0.714543	0.715513	0.801561	0.541861	0.645553	0.462625	0.590977	0.68932	0.763492	0.825607	0.793227	0.341406	0.684468	0.676736	0.479639	0.665338	0.634742	0.624931	0.562901	0.606189	0.604521	0.592804	0.77496	0.54307	0.738622	0.736793	0.71397	0.63634	0.707534	0.742798	0.667616	0.758941	0.756002	0.790583
	14.2857	0.572189	0.646913	0.646805	0.67861	0.623348	0.637641	0.739633	0.75161	0.460116	0.605272	0.574245	0.789482	0.622586	0.649237	0.709057	0.710868	0.79376	0.543487	0.636764	0.449237	0.586792	0.679575	0.755778	0.818292	0.788168	0.334377	0.676508	0.670278	0.463767	0.652664	0.622674	0.621253	0.550913	0.593086	0.592337	0.580587	0.770065	0.530572	0.731403	0.730019	0.710086	0.629445	0.699496	0.735325	0.658471	0.751257	0.748608	0.78747
	14.6939	0.562246	0.640335	0.639869	0.668363	0.617352	0.626271	0.732001	0.742221	0.442085	0.594664	0.565833	0.782074	0.611682	0.642195	0.703935	0.706548	0.785929	0.545881	0.62834	0.437006	0.583157	0.67007	0.748123	0.810937	0.783221	0.329479	0.668834	0.664138	0.448737	0.640045	0.610712	0.617652	0.539707	0.580256	0.580596	0.568689	0.765459	0.518965	0.724474	0.723569	0.70653	0.623186	0.691708	0.727972	0.649589	0.743682	0.741408	0.78474
	15.102	0.5527	0.634152	0.633303	0.65823	0.611674	0.614973	0.724557	0.732775	0.424501	0.583993	0.558353	0.774763	0.600853	0.635538	0.699092	0.702475	0.778039	0.548761	0.620236	0.425955	0.579915	0.660777	0.740451	0.803499	0.77835	0.326525	0.661408	0.658258	0.434541	0.627474	0.598806	0.613952	0.529285	0.567677	0.569205	0.557082	0.761109	0.508178	0.717786	0.717392	0.703215	0.617456	0.684128	0.720696	0.640918	0.736192	0.734325	0.782343
	15.5102	0.543568	0.628367	0.627074	0.648206	0.606264	0.603755	0.717298	0.723274	0.407404	0.573314	0.551806	0.767547	0.59014	0.629197	0.694518	0.698617	0.770098	0.551966	0.612418	0.416171	0.577005	0.651674	0.732789	0.796003	0.77352	0.325312	0.654199	0.65259	0.42125	0.614947	0.586946	0.610088	0.519679	0.555354	0.558242	0.545742	0.756982	0.498324	0.711365	0.711494	0.70007	0.61227	0.676747	0.713462	0.632448	0.728775	0.727402	0.780263
	15.9184	0.534778	0.622871	0.621108	0.638259	0.601042	0.592572	0.710188	0.713711	0.390785	0.562517	0.546161	0.760419	0.579464	0.623081	0.690135	0.694905	0.762078	0.555215	0.604834	0.407655	0.57426	0.642726	0.725091	0.788438	0.76869	0.325567	0.647148	0.647076	0.40886	0.602454	0.57508	0.605914	0.510881	0.543243	0.54765	0.534626	0.753034	0.48936	0.705175	0.705831	0.696999	0.607516	0.669529	0.70622	0.624131	0.721396	0.720577	0.778447
	16.3265	0.526281	0.617625	0.615344	0.628369	0.595945	0.581413	0.703201	0.704084	0.374653	0.551577	0.541381	0.753372	0.568801	0.617103	0.6859	0.69129	0.753972	0.558361	0.59744	0.400459	0.571604	0.633903	0.717341	0.780791	0.763823	0.327023	0.640208	0.641667	0.397388	0.589989	0.563174	0.601354	0.502891	0.53133	0.53743	0.523695	0.749225	0.481306	0.69921	0.700382	0.693922	0.603163	0.662448	0.698927	0.615941	0.714033	0.713842	0.776858
	16.7347	0.518092	0.612561	0.609707	0.618523	0.590923	0.570268	0.696322	0.694393	0.35902	0.540502	0.537437	0.746403	0.558151	0.611195	0.681779	0.68773	0.745774	0.561192	0.590192	0.394582	0.568911	0.625178	0.709546	0.773088	0.758884	0.3294	0.633332	0.636317	0.38686	0.577546	0.551202	0.596333	0.495704	0.519584	0.527602	0.512917	0.745525	0.474189	0.69347	0.695124	0.690758	0.599145	0.655483	0.69155	0.607848	0.706659	0.707192	0.775464
	17.1429	0.510127	0.607603	0.604136	0.608696	0.58591	0.559111	0.689516	0.684639	0.343868	0.529199	0.534269	0.739507	0.547437	0.605307	0.677709	0.684165	0.737461	0.563549	0.583044	0.390021	0.566081	0.616525	0.701658	0.765293	0.75384	0.332423	0.62648	0.630981	0.377246	0.565123	0.539125	0.590766	0.489293	0.507985	0.518091	0.502262	0.741908	0.467936	0.687921	0.69001	0.687425	0.595375	0.648593	0.684066	0.599813	0.699248	0.700571	0.774221
	17.551	0.502451	0.602742	0.59859	0.598902	0.580882	0.547968	0.682789	0.674834	0.329223	0.517768	0.531847	0.732684	0.53672	0.599431	0.673704	0.680576	0.729047	0.565323	0.575966	0.386782	0.563056	0.607934	0.693721	0.757443	0.748668	0.335858	0.619641	0.625627	0.368583	0.552726	0.526952	0.58465	0.483653	0.496541	0.508965	0.491724	0.738371	0.462618	0.682591	0.685038	0.683868	0.591836	0.641769	0.676473	0.591824	0.691793	0.694022	0.773121
	17.9592	0.495008	0.597899	0.593034	0.589129	0.575787	0.53682	0.676116	0.664982	0.315061	0.506123	0.530105	0.725936	0.525929	0.593576	0.66971	0.676912	0.720513	0.566354	0.56892	0.384811	0.559728	0.599391	0.685689	0.749512	0.743347	0.339473	0.612799	0.620224	0.360822	0.54036	0.514663	0.57792	0.478744	0.485242	0.500135	0.481297	0.73491	0.458127	0.677443	0.680151	0.680019	0.588418	0.634968	0.668774	0.583839	0.684276	0.687484	0.77213
	18.3673	0.487836	0.593096	0.587471	0.579396	0.570617	0.525705	0.669507	0.655104	0.3014	0.494358	0.528999	0.719264	0.51512	0.587781	0.665749	0.673162	0.711874	0.566611	0.561889	0.384104	0.556087	0.590892	0.677597	0.741516	0.737861	0.343095	0.605969	0.614751	0.353978	0.528042	0.502283	0.570608	0.474553	0.474122	0.491649	0.471	0.731539	0.454508	0.672504	0.675344	0.675843	0.585119	0.628181	0.66099	0.575856	0.676707	0.681	0.771253
	18.7755	0.480936	0.588283	0.581898	0.569715	0.56535	0.514629	0.662953	0.645215	0.28823	0.482467	0.528469	0.712673	0.504285	0.582086	0.661803	0.6693	0.703128	0.565974	0.554848	0.384577	0.552054	0.582434	0.669439	0.733463	0.732201	0.346558	0.599162	0.609194	0.348009	0.515788	0.489822	0.5627	0.471038	0.463191	0.483469	0.460845	0.728269	0.451686	0.667762	0.67058	0.671296	0.581854	0.62138	0.653138	0.567843	0.669082	0.674546	0.770471
	19.1837	0.474276	0.583468	0.576337	0.560093	0.559981	0.503612	0.656447	0.635334	0.275543	0.470467	0.528447	0.706165	0.493426	0.576524	0.657865	0.665308	0.694279	0.564437	0.547784	0.386194	0.547627	0.574009	0.66121	0.725337	0.726358	0.349744	0.592396	0.603541	0.34288	0.503615	0.477296	0.554223	0.468167	0.452481	0.475574	0.450854	0.725108	0.449625	0.663217	0.665835	0.666351	0.578596	0.614543	0.645236	0.559794	0.66141	0.668124	0.769777
	19.5918	0.467898	0.578643	0.570805	0.550554	0.554526	0.492687	0.649989	0.625482	0.263349	0.458442	0.528878	0.69974	0.482601	0.571117	0.653944	0.661188	0.685342	0.561956	0.540688	0.388866	0.542776	0.565614	0.652943	0.717174	0.720328	0.352552	0.585687	0.59779	0.338565	0.491545	0.464736	0.545226	0.465905	0.442008	0.467997	0.441045	0.722062	0.448309	0.658889	0.661097	0.660987	0.575313	0.607662	0.637299	0.5517	0.653698	0.661756	0.769169
	20	0.461722	0.573774	0.565311	0.541094	0.548983	0.481852	0.643549	0.615675	0.251619	0.446339	0.529677	0.693397	0.471765	0.565857	0.649998	0.656917	0.676309	0.558511	0.533545	0.39251	0.537476	0.557235	0.644605	0.708944	0.714103	0.354896	0.579035	0.591939	0.33498	0.479593	0.45214	0.535716	0.464201	0.431777	0.460662	0.431423	0.719121	0.44762	0.654753	0.656326	0.655178	0.571939	0.600708	0.629327	0.543543	0.645944	0.655398	0.768615
	20.4082	0.455778	0.568877	0.559862	0.531729	0.543393	0.471147	0.637125	0.605933	0.240368	0.434273	0.530787	0.687134	0.460994	0.560719	0.646042	0.65251	0.667199	0.554132	0.526354	0.397043	0.53174	0.548863	0.636241	0.700682	0.707681	0.356723	0.572444	0.585994	0.332097	0.46778	0.439537	0.525778	0.463019	0.421798	0.453628	0.421998	0.716275	0.447574	0.65084	0.651527	0.64892	0.568488	0.593684	0.621322	0.535332	0.638156	0.649091	0.768113
	20.8163	0.450008	0.563888	0.554437	0.522455	0.537771	0.460565	0.630679	0.596268	0.229567	0.422198	0.532127	0.680944	0.450248	0.555654	0.642024	0.647954	0.658002	0.548787	0.519104	0.40234	0.525524	0.540483	0.627824	0.692378	0.701057	0.35797	0.565894	0.579958	0.329818	0.45612	0.426918	0.51543	0.462297	0.412046	0.446823	0.412758	0.713499	0.448029	0.647124	0.64666	0.64219	0.564879	0.586566	0.613271	0.527049	0.630321	0.64278	0.767623
	21.2245	0.4444	0.55882	0.549022	0.51328	0.532166	0.450137	0.624195	0.586695	0.219223	0.410191	0.533633	0.674825	0.439569	0.550611	0.637943	0.643263	0.648733	0.542547	0.511797	0.408322	0.518856	0.532085	0.619379	0.684037	0.694231	0.358607	0.559375	0.573844	0.328093	0.444628	0.414296	0.504756	0.461996	0.402518	0.440274	0.403699	0.710773	0.448973	0.643622	0.641729	0.634993	0.56113	0.579354	0.605169	0.518706	0.622441	0.636485	0.767131
	21.6327	0.438961	0.553622	0.543577	0.504212	0.526617	0.439872	0.617651	0.577226	0.209331	0.398284	0.535245	0.668772	0.428973	0.545544	0.633777	0.638441	0.639393	0.535401	0.504428	0.414847	0.511701	0.523665	0.610917	0.675683	0.687203	0.358595	0.552866	0.567663	0.326843	0.43332	0.401674	0.493815	0.462056	0.393184	0.433964	0.394809	0.708077	0.450308	0.640332	0.636715	0.627323	0.557192	0.572042	0.59701	0.510298	0.614506	0.630185	0.76661
	22.0408	0.433651	0.548282	0.538071	0.495254	0.521166	0.429785	0.611023	0.567869	0.199885	0.386491	0.536896	0.662783	0.41845	0.54042	0.629503	0.633494	0.629984	0.527417	0.497	0.421824	0.504077	0.51522	0.602435	0.667297	0.679979	0.357915	0.546354	0.561432	0.325994	0.422208	0.389055	0.482675	0.462426	0.384028	0.427863	0.386081	0.705396	0.451959	0.637248	0.631606	0.61919	0.553054	0.564621	0.588798	0.501829	0.606512	0.623862	0.766035
	22.449	0.42853	0.542798	0.532475	0.486435	0.515877	0.419912	0.604314	0.558639	0.190909	0.374929	0.538551	0.656861	0.408076	0.535237	0.625144	0.62845	0.620527	0.518643	0.489524	0.429124	0.495988	0.506766	0.593982	0.658919	0.672568	0.356556	0.53984	0.555169	0.325501	0.411312	0.376468	0.471444	0.463061	0.375043	0.422012	0.377522	0.702727	0.453899	0.634392	0.626409	0.610614	0.54872	0.5571	0.58055	0.493313	0.598465	0.617543	0.765403
	22.8571	0.423565	0.537141	0.526763	0.477767	0.510787	0.41026	0.597505	0.549543	0.182399	0.363579	0.540157	0.651007	0.397826	0.53001	0.620674	0.62331	0.61102	0.509122	0.482007	0.43664	0.48743	0.498313	0.585542	0.650531	0.664983	0.354513	0.533324	0.548894	0.325279	0.400647	0.363919	0.460184	0.463905	0.366217	0.416349	0.369138	0.700071	0.45601	0.631746	0.621103	0.601618	0.54415	0.549469	0.572286	0.484747	0.590364	0.611188	0.764693
	23.2653	0.418814	0.531356	0.520936	0.469288	0.505964	0.400879	0.590613	0.540597	0.174393	0.352582	0.54169	0.645227	0.387787	0.524783	0.616136	0.61811	0.601491	0.498959	0.47447	0.444273	0.478451	0.48989	0.577172	0.642161	0.657244	0.351805	0.526833	0.54263	0.325311	0.390233	0.351454	0.449028	0.464927	0.357572	0.41093	0.360953	0.697445	0.458305	0.629344	0.615709	0.592246	0.539387	0.541743	0.564045	0.476156	0.582228	0.604848	0.763916
	23.6735	0.41428	0.52542	0.514991	0.461024	0.501446	0.391781	0.583634	0.531808	0.166906	0.341948	0.543114	0.639529	0.377968	0.519607	0.611525	0.612861	0.591947	0.48819	0.466927	0.451907	0.46904	0.481524	0.568872	0.633814	0.649371	0.348444	0.520386	0.536398	0.325527	0.380088	0.339095	0.438053	0.466075	0.349109	0.405715	0.352991	0.694862	0.460673	0.627171	0.610212	0.582535	0.534391	0.533917	0.55586	0.467539	0.57407	0.598499	0.763065
	24.0816	0.409968	0.519388	0.508953	0.453006	0.497289	0.383004	0.576581	0.523192	0.15997	0.331763	0.544403	0.633919	0.368414	0.514537	0.606866	0.607592	0.582408	0.476942	0.459405	0.459473	0.459258	0.473244	0.560673	0.625492	0.641386	0.344471	0.51402	0.53022	0.325905	0.37023	0.326888	0.427379	0.467321	0.340861	0.400724	0.345284	0.69234	0.463114	0.625247	0.604627	0.572544	0.529206	0.526004	0.547772	0.458919	0.565914	0.592171	0.762149
	24.4898	0.405916	0.513265	0.502839	0.445267	0.493533	0.374571	0.569464	0.514755	0.153623	0.322094	0.545537	0.628404	0.359185	0.50962	0.602178	0.602326	0.572897	0.465274	0.451925	0.466865	0.449115	0.465085	0.552605	0.617224	0.633312	0.339916	0.507764	0.524117	0.326409	0.360673	0.314867	0.417112	0.46863	0.332843	0.395972	0.337861	0.689892	0.465573	0.623578	0.598959	0.562326	0.523824	0.518013	0.539811	0.450303	0.557782	0.58588	0.76117
	24.898	0.402077	0.507074	0.496674	0.437822	0.49021	0.366495	0.562277	0.506505	0.147883	0.312945	0.546481	0.622988	0.350275	0.504878	0.597452	0.597077	0.563419	0.453292	0.444507	0.474026	0.43865	0.45707	0.544663	0.608994	0.625172	0.334824	0.501641	0.518104	0.326995	0.351429	0.303057	0.407335	0.469968	0.325075	0.391426	0.330742	0.687522	0.467996	0.622153	0.593209	0.55194	0.518258	0.509946	0.532	0.441704	0.549692	0.579616	0.760123
	25.3061	0.398489	0.500846	0.490477	0.430697	0.487358	0.358801	0.555034	0.498448	0.142796	0.304415	0.54722	0.617674	0.341761	0.50032	0.592714	0.591875	0.554002	0.44109	0.437177	0.480876	0.427896	0.44923	0.536892	0.600835	0.616985	0.329239	0.495673	0.512196	0.327653	0.342505	0.291495	0.398166	0.471314	0.317573	0.387143	0.323946	0.68523	0.470389	0.620993	0.587401	0.54145	0.512541	0.501823	0.524358	0.433139	0.541666	0.57342	0.759013
	25.7143	0.395105	0.494563	0.484247	0.423896	0.484982	0.351478	0.547719	0.490581	0.13837	0.29646	0.547719	0.612463	0.333618	0.495928	0.587932	0.586722	0.544644	0.428736	0.429946	0.487355	0.416858	0.441583	0.529274	0.592736	0.608768	0.323193	0.489861	0.506402	0.328325	0.333899	0.28018	0.389661	0.472628	0.310329	0.383068	0.317475	0.682999	0.472658	0.62007	0.581525	0.530907	0.506654	0.493646	0.516884	0.424608	0.533713	0.567259	0.757816
	26.1225	0.391932	0.488259	0.477986	0.417432	0.483103	0.344542	0.540337	0.482906	0.134634	0.289154	0.547961	0.607354	0.325898	0.491675	0.58312	0.581644	0.535367	0.41635	0.422834	0.493414	0.405583	0.434155	0.521843	0.584713	0.600539	0.316732	0.484207	0.500729	0.329006	0.325607	0.269133	0.381922	0.473894	0.303352	0.379252	0.311331	0.680814	0.474828	0.619398	0.575609	0.520379	0.500649	0.485434	0.509582	0.416132	0.525848	0.56117	0.756531
	26.5306	0.388969	0.4819	0.471663	0.41131	0.481711	0.337977	0.532878	0.475416	0.1316	0.282464	0.547926	0.602349	0.318603	0.487529	0.578255	0.576642	0.526172	0.403971	0.415849	0.498983	0.394056	0.426964	0.514595	0.576777	0.59231	0.309878	0.478696	0.495177	0.329645	0.317618	0.258348	0.374995	0.475076	0.296618	0.375671	0.305501	0.678653	0.476817	0.618954	0.569649	0.509915	0.494504	0.477195	0.502441	0.407708	0.518072	0.55513	0.755133
	26.9388	0.386192	0.4755	0.465258	0.405533	0.480797	0.331779	0.52534	0.468104	0.129261	0.276398	0.547593	0.597447	0.311735	0.483464	0.57333	0.571725	0.517067	0.391708	0.409003	0.504035	0.382314	0.420033	0.507535	0.568917	0.584096	0.302665	0.47332	0.489746	0.330224	0.309918	0.247823	0.368938	0.476154	0.290125	0.372326	0.299978	0.676493	0.478623	0.618727	0.563663	0.499578	0.488255	0.468942	0.495459	0.399348	0.510391	0.549147	0.75361
	27.3469	0.383647	0.469043	0.458732	0.400116	0.48034	0.325943	0.517733	0.460965	0.127626	0.270968	0.546961	0.592649	0.305339	0.479471	0.568353	0.566904	0.508065	0.379609	0.402303	0.508505	0.370352	0.413388	0.500686	0.561161	0.575912	0.295118	0.468067	0.484431	0.330724	0.302489	0.237559	0.363803	0.477103	0.283863	0.369247	0.294754	0.674321	0.480217	0.618713	0.557662	0.489423	0.48191	0.460693	0.488634	0.391059	0.502811	0.543235	0.751953
	27.7551	0.381303	0.462522	0.452057	0.395059	0.480301	0.320449	0.510054	0.453988	0.126661	0.266114	0.546015	0.58796	0.299386	0.475556	0.563303	0.562171	0.499163	0.367741	0.395752	0.512371	0.358183	0.407052	0.49403	0.553492	0.567772	0.28726	0.462929	0.479227	0.331111	0.295312	0.227543	0.3596	0.477898	0.27783	0.366393	0.289827	0.672122	0.481552	0.618882	0.551648	0.479505	0.475469	0.452452	0.481966	0.382839	0.495332	0.537373	0.750144
	28.1633	0.379214	0.455955	0.445211	0.390384	0.480651	0.315307	0.502329	0.447172	0.126348	0.261875	0.544764	0.583383	0.293937	0.471751	0.558214	0.557539	0.49038	0.356171	0.389362	0.515593	0.345832	0.401057	0.487602	0.545931	0.559693	0.279125	0.45791	0.474125	0.331394	0.288366	0.217786	0.35637	0.478531	0.272045	0.363817	0.285205	0.669898	0.482658	0.619239	0.545646	0.469887	0.468976	0.444244	0.475467	0.374704	0.487969	0.531605	0.748192
	28.5714	0.37737	0.449323	0.438178	0.386098	0.481328	0.31049	0.494567	0.440507	0.126637	0.258162	0.543204	0.578923	0.288973	0.468093	0.553071	0.552997	0.481716	0.344924	0.383132	0.518144	0.333294	0.395428	0.48138	0.538474	0.551691	0.270734	0.453014	0.469116	0.331541	0.281631	0.208279	0.354088	0.478977	0.26652	0.36148	0.280896	0.667645	0.483467	0.61975	0.539648	0.460617	0.462411	0.436074	0.469143	0.366645	0.480727	0.525907	0.746085
	28.9796	0.375782	0.442668	0.430967	0.38221	0.482289	0.306007	0.486793	0.433996	0.127474	0.254991	0.541342	0.574587	0.284523	0.46463	0.547901	0.54855	0.473185	0.334076	0.377073	0.520021	0.320616	0.390193	0.475384	0.53112	0.543781	0.262133	0.448259	0.46419	0.331566	0.275087	0.199035	0.352763	0.479234	0.261298	0.359413	0.276922	0.665372	0.484025	0.620413	0.533681	0.451755	0.455826	0.427962	0.46301	0.358679	0.473625	0.52032	0.743836
	29.3878	0.374469	0.435978	0.423584	0.378731	0.483466	0.301841	0.479027	0.427633	0.1288	0.252295	0.539183	0.570379	0.280602	0.461402	0.542708	0.54419	0.464792	0.323623	0.371187	0.521201	0.307792	0.385373	0.469608	0.523885	0.535979	0.253348	0.443657	0.459333	0.331453	0.268714	0.190051	0.352355	0.479289	0.256404	0.357615	0.2733	0.66308	0.484294	0.621203	0.527741	0.443344	0.449211	0.41992	0.457073	0.350801	0.466676	0.514845	0.741446
	29.7959	0.373391	0.429282	0.416052	0.375654	0.484799	0.297983	0.471281	0.421419	0.130531	0.250021	0.536721	0.5663	0.27719	0.458434	0.537492	0.539909	0.456543	0.313618	0.36548	0.521708	0.294866	0.380984	0.464038	0.516749	0.528298	0.244422	0.439222	0.454533	0.331195	0.262493	0.18133	0.352818	0.47914	0.25188	0.356065	0.270046	0.660771	0.484285	0.622099	0.52184	0.435427	0.442595	0.411959	0.451335	0.343017	0.459893	0.509491	0.738919
	30.2041	0.372574	0.422587	0.408391	0.372981	0.486226	0.294426	0.463579	0.415354	0.132605	0.248142	0.533967	0.562354	0.274321	0.45574	0.532267	0.535704	0.448448	0.304056	0.359957	0.521535	0.281849	0.377036	0.458686	0.509733	0.520747	0.23539	0.434965	0.449776	0.330796	0.256403	0.172873	0.354108	0.478783	0.247756	0.354803	0.267173	0.658441	0.484013	0.62309	0.515988	0.428037	0.435997	0.4041	0.44579	0.335334	0.453292	0.504286	0.736261
	30.6122	0.371959	0.415885	0.400616	0.370692	0.487672	0.291143	0.455919	0.409435	0.134932	0.246546	0.530908	0.558536	0.271945	0.453305	0.527007	0.531553	0.4405	0.294939	0.354615	0.520716	0.268758	0.373526	0.453513	0.502817	0.513332	0.226281	0.430883	0.445044	0.330226	0.250423	0.164664	0.356132	0.478209	0.244048	0.353776	0.264679	0.656074	0.483444	0.624133	0.510178	0.421191	0.42941	0.396347	0.44042	0.327748	0.446877	0.499206	0.733461
	31.0204	0.371553	0.409194	0.39274	0.368774	0.489082	0.288128	0.448319	0.403663	0.137442	0.245224	0.527552	0.554846	0.270079	0.451107	0.521723	0.527455	0.432708	0.28627	0.349459	0.519269	0.255625	0.370448	0.448531	0.496011	0.506058	0.217131	0.426971	0.440324	0.329491	0.244532	0.1567	0.358834	0.477422	0.240776	0.353024	0.262562	0.653654	0.482625	0.625221	0.504428	0.414906	0.422874	0.388722	0.435205	0.320272	0.440658	0.494289	0.730526
	31.4286	0.371324	0.402476	0.384756	0.367208	0.490379	0.285347	0.440777	0.398033	0.140068	0.244055	0.523893	0.551278	0.268684	0.449107	0.516387	0.523383	0.425061	0.278002	0.34448	0.517222	0.242441	0.367787	0.443704	0.489307	0.498927	0.207954	0.423208	0.435597	0.328557	0.238708	0.148952	0.362104	0.476408	0.237935	0.352508	0.260804	0.651158	0.481509	0.62631	0.498725	0.409173	0.416365	0.381231	0.430114	0.312899	0.434626	0.489503	0.727438
	31.8367	0.371244	0.395744	0.376661	0.365971	0.491511	0.282792	0.433301	0.392545	0.142736	0.243011	0.519934	0.547827	0.267735	0.447273	0.510997	0.519328	0.41756	0.270136	0.33968	0.514617	0.229244	0.365523	0.439023	0.482696	0.491938	0.198778	0.419579	0.430849	0.327419	0.23293	0.141405	0.365866	0.47517	0.235531	0.352227	0.259391	0.648563	0.480135	0.627379	0.493081	0.403985	0.409916	0.373889	0.425119	0.305641	0.428784	0.484866	0.724198
	32.2449	0.371326	0.388961	0.368434	0.36505	0.492414	0.280439	0.425903	0.387195	0.145401	0.24202	0.515684	0.544489	0.267226	0.445578	0.505547	0.515274	0.410201	0.262602	0.335051	0.511474	0.216024	0.363635	0.434477	0.476188	0.485091	0.189611	0.416057	0.426065	0.326058	0.227177	0.134038	0.370022	0.473699	0.233554	0.352185	0.258306	0.645851	0.478484	0.628399	0.487488	0.399315	0.403515	0.36671	0.420193	0.298501	0.423121	0.48037	0.7208
	32.6531	0.371525	0.382121	0.36006	0.36442	0.493032	0.278271	0.418586	0.381982	0.147998	0.241013	0.511147	0.541261	0.2671	0.444006	0.500024	0.511201	0.402975	0.255379	0.330587	0.507848	0.202809	0.362096	0.430035	0.469759	0.478387	0.180468	0.412624	0.421234	0.324455	0.221432	0.12683	0.374472	0.471991	0.232005	0.352337	0.257533	0.643006	0.47656	0.629336	0.481943	0.395133	0.39717	0.359699	0.415313	0.291484	0.41763	0.476002	0.717239
	33.0612	0.371868	0.37522	0.351528	0.364077	0.493322	0.276288	0.411376	0.37691	0.150492	0.239984	0.506344	0.538139	0.267371	0.442563	0.494451	0.507105	0.395886	0.248414	0.326287	0.503761	0.189614	0.360885	0.425707	0.463425	0.471828	0.171363	0.409268	0.416345	0.322615	0.215682	0.119777	0.379148	0.470049	0.230892	0.352715	0.257068	0.640024	0.474395	0.630177	0.476453	0.391402	0.390896	0.352877	0.410466	0.284606	0.412309	0.471786	0.713528
	33.4694	0.372318	0.368237	0.342833	0.364003	0.493227	0.27447	0.404284	0.371979	0.152836	0.238848	0.501283	0.535122	0.267981	0.441263	0.488816	0.502964	0.388924	0.241654	0.322144	0.499265	0.176452	0.359973	0.421455	0.457167	0.465417	0.162306	0.405978	0.411392	0.320512	0.209919	0.112867	0.383943	0.467864	0.230217	0.353264	0.256907	0.636904	0.47196	0.630881	0.471001	0.388077	0.384676	0.346245	0.40564	0.27787	0.407148	0.467693	0.709666
	33.8775	0.372879	0.361199	0.333989	0.364188	0.49272	0.27283	0.397336	0.367196	0.154991	0.237629	0.495986	0.532208	0.268929	0.440131	0.48315	0.498779	0.382096	0.235075	0.318161	0.494404	0.163367	0.359339	0.417291	0.450986	0.459157	0.153322	0.40276	0.406372	0.318162	0.204136	0.106115	0.388803	0.465449	0.230001	0.354002	0.257057	0.633656	0.469317	0.631443	0.465598	0.385115	0.378544	0.339822	0.400836	0.271298	0.402153	0.463755	0.705679
	34.2857	0.373537	0.354089	0.325012	0.36462	0.491757	0.271357	0.390551	0.362568	0.15693	0.236264	0.49047	0.529394	0.270186	0.439193	0.477457	0.494539	0.375397	0.22861	0.314336	0.489218	0.15037	0.358956	0.413189	0.444882	0.453054	0.144423	0.399616	0.401282	0.315547	0.198336	0.0995296	0.393637	0.462799	0.230246	0.354904	0.257519	0.63029	0.466442	0.631831	0.460228	0.382462	0.372479	0.333611	0.396051	0.264898	0.397321	0.459955	0.701575
	34.6939	0.374253	0.34694	0.31594	0.365278	0.490314	0.27006	0.383947	0.358101	0.158607	0.23476	0.484745	0.526679	0.271712	0.438467	0.471751	0.49024	0.368828	0.222257	0.310675	0.483771	0.137519	0.358797	0.409143	0.438837	0.44711	0.135639	0.39656	0.396122	0.312669	0.192522	0.093134	0.398383	0.459925	0.23096	0.355947	0.258299	0.626817	0.463382	0.63203	0.454895	0.380072	0.366509	0.327625	0.391284	0.258692	0.392659	0.456306	0.697379
	35.102	0.375027	0.339752	0.306806	0.366148	0.48837	0.268939	0.377543	0.353806	0.160005	0.233103	0.478835	0.524056	0.273503	0.437957	0.466051	0.485884	0.362394	0.215963	0.307178	0.478099	0.124838	0.358832	0.405151	0.432866	0.44133	0.126992	0.393598	0.390894	0.309529	0.1867	0.0869568	0.40298	0.456833	0.232134	0.357144	0.259397	0.623249	0.460152	0.632026	0.449593	0.37789	0.360633	0.321873	0.386531	0.252696	0.38817	0.452813	0.693111
	35.5102	0.375794	0.332535	0.297651	0.367201	0.4859	0.267988	0.371342	0.349687	0.161086	0.231255	0.472743	0.521518	0.275491	0.43765	0.460349	0.481464	0.356086	0.20972	0.30385	0.47227	0.112374	0.359028	0.401182	0.426943	0.435714	0.118506	0.390735	0.385601	0.306104	0.180881	0.0810192	0.40735	0.453525	0.233743	0.35844	0.2608	0.619588	0.456755	0.631789	0.444313	0.375864	0.354852	0.316358	0.381783	0.246923	0.383854	0.449458	0.688782
	35.9184	0.376553	0.325306	0.288508	0.368415	0.482902	0.267215	0.36536	0.345754	0.161832	0.229248	0.466492	0.519058	0.277674	0.437522	0.454668	0.476992	0.349913	0.203513	0.300696	0.466325	0.100175	0.359352	0.397248	0.421079	0.430264	0.110209	0.387974	0.380248	0.302405	0.175075	0.0753609	0.411452	0.450014	0.235759	0.359858	0.262499	0.615838	0.453243	0.631318	0.439061	0.37394	0.349188	0.311094	0.377026	0.241401	0.379714	0.446261	0.684415
	36.3265	0.377251	0.318046	0.279399	0.369762	0.479359	0.266604	0.359592	0.342007	0.162222	0.227023	0.46009	0.516667	0.279987	0.43753	0.448993	0.472462	0.343862	0.19732	0.297715	0.460317	0.0882722	0.359764	0.393318	0.415262	0.424978	0.102117	0.385304	0.374836	0.298404	0.169292	0.0700027	0.415207	0.446295	0.238129	0.361353	0.264466	0.611992	0.449588	0.63058	0.433818	0.372062	0.343622	0.306079	0.37224	0.236135	0.375742	0.443185	0.680014
	36.7347	0.377868	0.310775	0.270343	0.371213	0.475277	0.266162	0.354046	0.338452	0.162233	0.224617	0.453556	0.514332	0.282403	0.437632	0.44334	0.46789	0.337937	0.19116	0.294908	0.454292	0.0767375	0.360228	0.389398	0.409486	0.419855	0.0942581	0.382716	0.369373	0.294104	0.163543	0.0649855	0.418578	0.442381	0.240811	0.362921	0.266682	0.608046	0.445846	0.629571	0.428593	0.370181	0.338186	0.301325	0.36741	0.231152	0.371936	0.440243	0.675596
	37.1429	0.378392	0.303468	0.261341	0.37275	0.470655	0.265877	0.348723	0.335089	0.161862	0.222004	0.446913	0.512046	0.284888	0.437787	0.437709	0.463279	0.332133	0.185008	0.29227	0.44828	0.0656143	0.360707	0.385477	0.403759	0.414896	0.086642	0.380193	0.363864	0.289493	0.157841	0.0603461	0.421509	0.438268	0.243749	0.364553	0.269122	0.603997	0.442001	0.628273	0.423373	0.36824	0.332861	0.296831	0.362516	0.226461	0.368282	0.437408	0.671168
	37.551	0.378785	0.296134	0.252399	0.374346	0.4655	0.265748	0.343623	0.331918	0.16109	0.219196	0.44018	0.509798	0.28739	0.437963	0.432106	0.458642	0.326444	0.178898	0.289798	0.442326	0.0550087	0.361167	0.381545	0.398059	0.4101	0.079293	0.377721	0.358318	0.284564	0.152197	0.0561292	0.423958	0.433962	0.246898	0.366212	0.271767	0.599841	0.438078	0.626674	0.418158	0.366194	0.327665	0.292601	0.357548	0.222077	0.364772	0.434669	0.666741
	37.9592	0.379072	0.28877	0.243514	0.37599	0.45983	0.265782	0.33876	0.328941	0.159919	0.216227	0.433391	0.50758	0.289909	0.438144	0.426556	0.454001	0.320876	0.172829	0.287481	0.436437	0.0450603	0.361583	0.377618	0.392404	0.405471	0.0722285	0.375289	0.352744	0.279329	0.146626	0.0524006	0.425902	0.429471	0.250221	0.367923	0.274607	0.595587	0.434098	0.624775	0.41295	0.363998	0.322605	0.288641	0.352501	0.218014	0.361397	0.432025	0.662332
	38.3674	0.379215	0.281375	0.234691	0.377663	0.453655	0.265973	0.334133	0.326157	0.158338	0.213086	0.426571	0.505386	0.292387	0.438323	0.421063	0.449366	0.31542	0.166828	0.285311	0.430643	0.0360204	0.361928	0.373677	0.386777	0.401012	0.065472	0.37289	0.347152	0.273778	0.141146	0.0492185	0.427299	0.424793	0.253682	0.369636	0.277635	0.591241	0.430051	0.622559	0.407738	0.361612	0.317677	0.284944	0.347377	0.214277	0.358146	0.429443	0.657951
	38.7755	0.379238	0.273977	0.225945	0.379358	0.447003	0.266338	0.329761	0.323571	0.156348	0.209847	0.419757	0.503208	0.294832	0.438512	0.415667	0.444769	0.310088	0.160934	0.283277	0.424945	0.0283959	0.362188	0.36975	0.381185	0.39673	0.0590589	0.370529	0.341556	0.267936	0.135776	0.0466614	0.428155	0.419947	0.257263	0.371379	0.280855	0.586824	0.425989	0.620042	0.402535	0.359007	0.312912	0.28152	0.342187	0.210879	0.355022	0.426943	0.653625
	39.1837	0.379126	0.266573	0.217293	0.381063	0.439893	0.266874	0.325647	0.321182	0.153948	0.206505	0.41298	0.501043	0.297211	0.438721	0.410376	0.440229	0.304877	0.155166	0.281364	0.41935	0.0230803	0.362347	0.365824	0.375627	0.392633	0.0530239	0.368211	0.335968	0.261802	0.130537	0.0447851	0.428443	0.414933	0.260932	0.373126	0.28427	0.582355	0.42189	0.617212	0.397329	0.356156	0.308298	0.278359	0.336942	0.207816	0.352017	0.424493	0.649365
	39.5918	0.378871	0.259207	0.208771	0.382765	0.432359	0.267597	0.321802	0.318994	0.151131	0.20313	0.406271	0.498882	0.299512	0.438964	0.405223	0.43578	0.299795	0.149594	0.279561	0.41386	0.0212863	0.362395	0.361916	0.370096	0.388728	0.0474277	0.365951	0.330402	0.255399	0.125455	0.0436222	0.428173	0.409769	0.264672	0.374874	0.28789	0.577857	0.417804	0.614085	0.392133	0.353045	0.303873	0.275465	0.331658	0.20509	0.349138	0.422103	0.645201
	40	0.378485	0.251886	0.200409	0.384457	0.424432	0.268509	0.31823	0.317007	0.147907	0.199749	0.399666	0.496721	0.301735	0.439244	0.400227	0.43145	0.294848	0.144243	0.27785	0.40846	0.0232877	0.362326	0.358035	0.364605	0.385024	0.0423308	0.363763	0.324874	0.248742	0.120554	0.0431709	0.427348	0.404467	0.268452	0.376638	0.29172	0.573351	0.413727	0.610665	0.386945	0.34966	0.299637	0.272834	0.326349	0.202694	0.346387	0.419762	0.641146
	40.4082	0.37793	0.244639	0.192249	0.386117	0.416145	0.269609	0.314927	0.31522	0.144266	0.196394	0.39319	0.49455	0.303844	0.439553	0.395397	0.427268	0.290036	0.13918	0.276219	0.403155	0.0278187	0.362128	0.354175	0.359139	0.381526	0.0378231	0.361659	0.319394	0.241838	0.11586	0.0433679	0.42597	0.399037	0.272238	0.378386	0.295761	0.568851	0.409675	0.606957	0.38177	0.346	0.295611	0.270457	0.32102	0.200614	0.343767	0.417455	0.637217
	40.8163	0.377229	0.237489	0.184322	0.387737	0.407542	0.270904	0.311895	0.313634	0.140219	0.193132	0.386878	0.492362	0.305857	0.43987	0.390757	0.423272	0.285369	0.134451	0.274647	0.397919	0.0335069	0.361795	0.350362	0.353712	0.378241	0.0339996	0.359649	0.313977	0.234719	0.111398	0.0441278	0.424069	0.3935	0.275997	0.380153	0.300012	0.564371	0.405675	0.602982	0.376617	0.342062	0.291818	0.268337	0.315678	0.19884	0.341284	0.41519	0.633429
	41.2245	0.376348	0.230436	0.176652	0.389296	0.398656	0.27238	0.309117	0.312242	0.135768	0.189959	0.380753	0.490146	0.307735	0.440158	0.386297	0.419486	0.280841	0.130094	0.273115	0.392748	0.0395326	0.361314	0.346579	0.348317	0.375171	0.0309661	0.357735	0.308634	0.227386	0.10719	0.0453289	0.421648	0.38786	0.279679	0.381907	0.304462	0.559913	0.401703	0.598736	0.371484	0.337849	0.28826	0.266459	0.310317	0.197341	0.338934	0.412931	0.62978
	41.6327	0.375297	0.223506	0.169259	0.390778	0.389539	0.274041	0.306588	0.31104	0.130917	0.186953	0.374848	0.487893	0.309489	0.440377	0.382035	0.415948	0.276462	0.126169	0.271604	0.387617	0.0454983	0.36068	0.342851	0.342955	0.372321	0.0288154	0.355914	0.303377	0.219874	0.103258	0.0468513	0.41875	0.382139	0.283251	0.383671	0.309102	0.555479	0.397801	0.594245	0.366387	0.333369	0.284973	0.264823	0.304936	0.196101	0.336718	0.410688	0.626281
	42.0408	0.374077	0.216684	0.162141	0.392172	0.380229	0.275869	0.304292	0.310018	0.125685	0.184112	0.369192	0.485593	0.311105	0.440484	0.377961	0.412681	0.272226	0.122684	0.270086	0.382505	0.0512167	0.359882	0.339171	0.337635	0.369691	0.0275886	0.354177	0.298219	0.212199	0.0996186	0.0485907	0.415398	0.376343	0.286669	0.385441	0.313917	0.551064	0.393933	0.589512	0.361325	0.328628	0.281949	0.263416	0.299527	0.195088	0.334627	0.408426	0.622919
	42.449	0.372683	0.209989	0.155301	0.393463	0.370776	0.27786	0.302215	0.309167	0.120075	0.181493	0.363812	0.483237	0.312572	0.440441	0.374078	0.409715	0.268134	0.119683	0.26854	0.377395	0.0565728	0.358915	0.33555	0.332345	0.367285	0.0272606	0.352513	0.293172	0.204393	0.0962874	0.0504493	0.411637	0.370489	0.289904	0.387208	0.318895	0.546665	0.390124	0.584558	0.356311	0.323641	0.279221	0.262232	0.294088	0.194273	0.332655	0.40614	0.619695
	42.8571	0.371151	0.203417	0.148723	0.39465	0.361231	0.280008	0.300352	0.308478	0.114115	0.179124	0.358743	0.480818	0.313915	0.440223	0.370392	0.407077	0.264192	0.117166	0.266934	0.37225	0.0615371	0.357779	0.332001	0.327103	0.365106	0.0277127	0.35091	0.288249	0.196498	0.0932771	0.0523664	0.407525	0.364592	0.292934	0.389004	0.324029	0.54228	0.386361	0.579401	0.351352	0.31842	0.27679	0.261261	0.288621	0.193628	0.330795	0.403817	0.616599
	43.2653	0.369469	0.196974	0.142398	0.395721	0.351639	0.282297	0.298686	0.307938	0.107813	0.17702	0.354008	0.47833	0.315111	0.439817	0.366893	0.404784	0.260392	0.115138	0.265244	0.367057	0.0660738	0.356477	0.328519	0.321896	0.363156	0.0287863	0.349359	0.283462	0.188548	0.0905973	0.0542845	0.403107	0.358663	0.29574	0.390799	0.329309	0.537909	0.382632	0.574054	0.346454	0.312987	0.27467	0.26049	0.283131	0.193116	0.329038	0.401433	0.613622
	43.6735	0.367684	0.190683	0.136319	0.396682	0.342058	0.284732	0.297218	0.307541	0.101197	0.175241	0.349642	0.475768	0.316202	0.439226	0.363598	0.402864	0.256747	0.113601	0.26344	0.361776	0.0701892	0.355017	0.325131	0.316737	0.361439	0.0302956	0.347857	0.278829	0.18061	0.0882562	0.0561693	0.398466	0.352728	0.298321	0.392634	0.334736	0.533559	0.378956	0.568551	0.341635	0.307367	0.27288	0.259914	0.277632	0.192714	0.327383	0.398998	0.61076
	44.0816	0.365793	0.184542	0.130477	0.397529	0.332534	0.287295	0.295934	0.307274	0.0942889	0.173766	0.345663	0.473129	0.31718	0.438458	0.360492	0.401322	0.253252	0.112523	0.261495	0.356393	0.0738908	0.353411	0.321826	0.311625	0.359959	0.0320848	0.346403	0.274361	0.172729	0.0862575	0.0579952	0.393658	0.3468	0.300666	0.394488	0.340305	0.529236	0.375299	0.562902	0.336895	0.301589	0.271411	0.259517	0.272138	0.192386	0.325824	0.396484	0.608001
	44.4898	0.363822	0.178592	0.124879	0.398263	0.323126	0.289987	0.29483	0.30713	0.0871095	0.172652	0.342093	0.470411	0.318075	0.437531	0.357591	0.400179	0.249915	0.111903	0.259388	0.350883	0.0771871	0.351676	0.318628	0.306559	0.358719	0.0340192	0.345005	0.270075	0.164985	0.0846036	0.0597339	0.388773	0.340906	0.302778	0.396381	0.346016	0.524952	0.371691	0.557142	0.332254	0.295691	0.270294	0.259292	0.266667	0.192106	0.324367	0.393907	0.605346
	44.898	0.361785	0.172834	0.119525	0.398888	0.313882	0.292792	0.293899	0.307098	0.0796957	0.171872	0.338946	0.467609	0.318909	0.436455	0.354881	0.399434	0.246739	0.111694	0.257092	0.345228	0.0801158	0.349826	0.315533	0.30155	0.35772	0.0360004	0.343668	0.265985	0.157446	0.0832917	0.0613745	0.383883	0.335068	0.304652	0.398321	0.351865	0.520714	0.368101	0.551291	0.327716	0.289711	0.269512	0.259225	0.261233	0.191847	0.323012	0.391251	0.602783
	45.3061	0.359674	0.167299	0.11443	0.399396	0.304854	0.295697	0.293123	0.307169	0.0720712	0.171435	0.336227	0.464723	0.319685	0.435235	0.352356	0.399089	0.243724	0.111874	0.254592	0.339426	0.0826894	0.347876	0.312542	0.296586	0.356962	0.0379563	0.342402	0.262103	0.150196	0.082316	0.0628916	0.379065	0.32931	0.306279	0.400293	0.35784	0.516529	0.364541	0.545371	0.323294	0.283697	0.269083	0.259306	0.255847	0.19158	0.321765	0.388517	0.600308
	45.7143	0.357515	0.161998	0.109597	0.39979	0.296098	0.298688	0.292493	0.307333	0.0642872	0.171329	0.33394	0.461747	0.320443	0.433864	0.350008	0.399142	0.240877	0.112407	0.25187	0.333462	0.0849625	0.345844	0.309666	0.291683	0.356441	0.0398304	0.341212	0.258441	0.143333	0.0816661	0.0642764	0.374405	0.32366	0.307652	0.40233	0.363928	0.5124	0.361005	0.539413	0.319	0.277694	0.268997	0.259525	0.250515	0.191289	0.320631	0.385712	0.59791
	46.1225	0.355284	0.156934	0.105029	0.400058	0.287654	0.301736	0.291984	0.307576	0.0563924	0.171503	0.332074	0.458679	0.321169	0.432323	0.347806	0.399574	0.238191	0.113248	0.248916	0.327354	0.0869679	0.343738	0.306886	0.28683	0.356151	0.0415925	0.340098	0.255011	0.136942	0.0813267	0.0655149	0.369959	0.318139	0.308751	0.404398	0.370103	0.508319	0.357471	0.533427	0.314837	0.271753	0.269245	0.259866	0.245234	0.190946	0.319607	0.382815	0.595573
	46.5306	0.353003	0.152122	0.100723	0.400197	0.279577	0.304826	0.291582	0.307889	0.0484707	0.171955	0.330621	0.455514	0.321901	0.430586	0.345744	0.400375	0.235669	0.11438	0.245718	0.321099	0.0887648	0.341574	0.304216	0.282031	0.356082	0.0432121	0.339057	0.251821	0.131144	0.0812791	0.0665984	0.365811	0.312777	0.309568	0.406525	0.376337	0.50428	0.353955	0.527445	0.310823	0.265923	0.269828	0.260325	0.240003	0.19054	0.318697	0.379845	0.593286
	46.9388	0.350661	0.147543	0.0966612	0.400201	0.271901	0.307924	0.29126	0.308255	0.0406515	0.172601	0.32956	0.452249	0.322632	0.42862	0.343779	0.401512	0.233304	0.115752	0.242267	0.314723	0.0904166	0.339361	0.301633	0.277291	0.356223	0.0446814	0.338075	0.248879	0.126032	0.0814997	0.0675307	0.362007	0.307593	0.310082	0.408688	0.382594	0.500267	0.350414	0.521474	0.306955	0.260253	0.27071	0.260884	0.234812	0.190053	0.317893	0.376774	0.591023
	47.3469	0.348263	0.14321	0.0928227	0.400061	0.264672	0.311008	0.290999	0.308663	0.0331567	0.173427	0.328872	0.448881	0.323374	0.426398	0.341898	0.402961	0.231091	0.117362	0.23856	0.308246	0.0919815	0.33711	0.299142	0.272598	0.356561	0.0459885	0.337139	0.246191	0.121727	0.0819632	0.0683081	0.358605	0.302616	0.31029	0.410887	0.388839	0.496267	0.346867	0.515539	0.303249	0.254794	0.271893	0.261537	0.229656	0.189476	0.317191	0.373615	0.588772
	47.7551	0.345828	0.139104	0.0891725	0.399779	0.257919	0.314053	0.290783	0.309097	0.0264382	0.174354	0.328533	0.445408	0.324143	0.4239	0.340068	0.404685	0.229029	0.11918	0.23459	0.301692	0.0935467	0.334837	0.296733	0.267966	0.357083	0.0471328	0.336228	0.243762	0.118323	0.0826412	0.068948	0.355646	0.297865	0.310186	0.413127	0.395036	0.492264	0.343279	0.509652	0.299703	0.24959	0.27333	0.262272	0.224532	0.188807	0.316583	0.370358	0.586507
	48.1633	0.343344	0.135227	0.085679	0.399347	0.251668	0.31703	0.290592	0.309545	0.021388	0.175342	0.328509	0.44183	0.324927	0.421118	0.338267	0.406645	0.227107	0.121202	0.230356	0.2951	0.0951697	0.332557	0.294391	0.263378	0.357771	0.0481149	0.335328	0.241595	0.115904	0.0835054	0.0694559	0.353152	0.293365	0.309773	0.415374	0.401149	0.488246	0.339647	0.503824	0.296324	0.24469	0.275008	0.263079	0.219441	0.188038	0.316062	0.366997	0.584212
	48.5714	0.340847	0.131583	0.0823044	0.398772	0.245945	0.319925	0.290421	0.309997	0.0194888	0.176349	0.328778	0.43815	0.325758	0.418062	0.336484	0.408805	0.225329	0.123437	0.225856	0.288495	0.0969399	0.330291	0.292123	0.258847	0.358612	0.048931	0.334422	0.239694	0.114534	0.0845281	0.0698499	0.351155	0.289139	0.309064	0.417651	0.407151	0.48421	0.335969	0.498078	0.293118	0.240136	0.276889	0.263954	0.214391	0.187178	0.315625	0.363548	0.581874
	48.9796	0.338324	0.128163	0.079017	0.398053	0.240756	0.322709	0.290252	0.310442	0.0216337	0.177304	0.329299	0.434369	0.326616	0.414748	0.334689	0.411113	0.223682	0.125876	0.221095	0.28193	0.0989146	0.328059	0.289904	0.254363	0.35959	0.0495859	0.333499	0.238058	0.114226	0.0856824	0.0701435	0.349643	0.285208	0.30807	0.419917	0.413011	0.480151	0.332216	0.492415	0.29008	0.235972	0.278936	0.264881	0.20939	0.186225	0.315265	0.359996	0.579477
	49.3878	0.335796	0.124989	0.0757929	0.397193	0.236113	0.325372	0.290084	0.310876	0.0268828	0.178199	0.330043	0.430493	0.327527	0.411204	0.332886	0.413535	0.22217	0.128553	0.216078	0.275435	0.101161	0.325885	0.287744	0.249925	0.360688	0.0500703	0.332556	0.236687	0.114981	0.0869453	0.0703436	0.348621	0.281598	0.306814	0.422182	0.418708	0.476075	0.328414	0.486859	0.287221	0.232238	0.281128	0.26586	0.204452	0.185194	0.314988	0.35637	0.57702
	49.7959	0.333262	0.122052	0.0726109	0.396195	0.232007	0.327889	0.289907	0.311292	0.0337844	0.178958	0.330969	0.426526	0.328481	0.407459	0.33105	0.416017	0.220786	0.131463	0.210814	0.269068	0.103731	0.323792	0.285619	0.245538	0.361889	0.0503851	0.33159	0.235577	0.116733	0.088295	0.070464	0.348054	0.278324	0.305308	0.424424	0.424216	0.471987	0.32453	0.481407	0.284531	0.228967	0.28341	0.266881	0.199588	0.184095	0.314792	0.35266	0.574493
	50.2041	0.330711	0.119371	0.0694645	0.395058	0.22843	0.330244	0.289712	0.311688	0.0414798	0.179575	0.332036	0.422473	0.329477	0.403538	0.32918	0.418521	0.219526	0.134638	0.205319	0.262878	0.106655	0.3218	0.283526	0.241186	0.363174	0.0505199	0.330605	0.234723	0.119411	0.089714	0.0704985	0.347909	0.275411	0.303569	0.426625	0.429513	0.467896	0.320589	0.476074	0.282017	0.226193	0.285768	0.267938	0.194808	0.18294	0.314684	0.348892	0.571903
	50.6123	0.328156	0.116943	0.066345	0.393784	0.225363	0.332418	0.289493	0.312063	0.049535	0.18	0.333205	0.418339	0.330522	0.399459	0.327265	0.420999	0.218388	0.138088	0.199609	0.256914	0.10997	0.319929	0.281455	0.236879	0.364524	0.0504686	0.329602	0.234117	0.122904	0.0911863	0.0704521	0.348138	0.272873	0.301611	0.428787	0.434572	0.463807	0.316578	0.470865	0.27967	0.223934	0.288148	0.26903	0.19012	0.181752	0.314669	0.345072	0.569246
	51.0204	0.325563	0.114765	0.0632535	0.392364	0.222775	0.334385	0.289232	0.312415	0.0577324	0.180198	0.334426	0.414129	0.331586	0.395227	0.325289	0.423405	0.217359	0.141819	0.193707	0.251242	0.113671	0.318192	0.279384	0.232603	0.365915	0.0502255	0.328581	0.233749	0.127096	0.0926977	0.0703131	0.348669	0.270724	0.299436	0.430867	0.439365	0.459724	0.312496	0.465775	0.277488	0.222211	0.290525	0.270146	0.185523	0.180543	0.314748	0.341204	0.566525
	51.4286	0.322946	0.112838	0.0601861	0.390798	0.220639	0.336132	0.288925	0.312748	0.0659441	0.180155	0.335661	0.409846	0.33268	0.390841	0.32325	0.425702	0.216439	0.145853	0.187639	0.245906	0.117769	0.316601	0.277313	0.22836	0.367326	0.0497808	0.32754	0.233609	0.131871	0.0942358	0.0700745	0.349444	0.268974	0.297058	0.432878	0.443861	0.45565	0.308362	0.460815	0.275469	0.221024	0.292863	0.271291	0.181019	0.179341	0.314926	0.337313	0.563744
	51.8367	0.320279	0.111139	0.0571368	0.389078	0.21891	0.33763	0.288552	0.313061	0.0740815	0.179814	0.336861	0.405494	0.333762	0.38629	0.321123	0.42784	0.215612	0.150172	0.181431	0.240976	0.122236	0.315165	0.275214	0.224146	0.36873	0.0491362	0.326469	0.233684	0.137102	0.095787	0.0697281	0.350369	0.267624	0.294474	0.434775	0.448023	0.451581	0.304151	0.455969	0.273599	0.220371	0.295117	0.272454	0.176601	0.178164	0.3152	0.333388	0.5609
	52.2449	0.317566	0.109668	0.0540973	0.387196	0.217552	0.338868	0.288107	0.313356	0.08209	0.179183	0.337985	0.401079	0.334828	0.381567	0.318912	0.429786	0.21487	0.154792	0.175116	0.236491	0.127054	0.313891	0.273087	0.219949	0.370105	0.0482844	0.325359	0.233961	0.14269	0.0973395	0.069259	0.351377	0.266678	0.291699	0.436558	0.451821	0.447518	0.299895	0.451244	0.271879	0.220237	0.297268	0.273639	0.17227	0.17704	0.315569	0.329454	0.557998
	52.6531	0.314809	0.108396	0.0510484	0.385151	0.216514	0.339826	0.287581	0.313638	0.0899111	0.178212	0.338994	0.396604	0.335853	0.376666	0.316599	0.431495	0.214204	0.159685	0.168722	0.232503	0.132192	0.312785	0.270914	0.215777	0.371425	0.0472315	0.324191	0.234428	0.148519	0.09888	0.0686661	0.352375	0.266127	0.288738	0.438206	0.455222	0.443457	0.295568	0.446626	0.270293	0.220594	0.299262	0.274841	0.168025	0.175994	0.316026	0.325504	0.555033
	53.0612	0.311997	0.107318	0.0479747	0.382936	0.215752	0.340494	0.286966	0.31391	0.0975113	0.176907	0.339849	0.392076	0.336805	0.371591	0.314187	0.432934	0.213601	0.164845	0.162288	0.229046	0.137606	0.311852	0.268686	0.211612	0.372669	0.0459775	0.322952	0.235072	0.154511	0.100396	0.0679351	0.353284	0.265964	0.285609	0.439692	0.458198	0.439399	0.291192	0.442113	0.268837	0.221412	0.301085	0.27606	0.16387	0.175051	0.316568	0.321551	0.552013
	53.4694	0.30916	0.10642	0.0448527	0.380556	0.215221	0.340868	0.286268	0.31418	0.104848	0.175256	0.340521	0.387504	0.337682	0.366362	0.311678	0.434072	0.213057	0.170248	0.155845	0.22614	0.143266	0.3111	0.266403	0.207463	0.373815	0.0445281	0.321626	0.235884	0.160576	0.101878	0.0670677	0.354031	0.266171	0.282335	0.441024	0.46073	0.435352	0.286768	0.4377	0.267499	0.222648	0.302693	0.277298	0.159818	0.17424	0.31719	0.317606	0.548938
	53.8775	0.306282	0.105687	0.0416677	0.37801	0.21487	0.340938	0.285481	0.314455	0.111891	0.173248	0.340977	0.382895	0.338442	0.361005	0.309073	0.434874	0.212557	0.175862	0.149434	0.22381	0.149116	0.310534	0.264048	0.203319	0.374845	0.0428918	0.320204	0.236853	0.166649	0.103315	0.0660567	0.354534	0.26673	0.278937	0.442157	0.462802	0.431325	0.282296	0.433374	0.266269	0.224259	0.304061	0.27855	0.155881	0.173581	0.317888	0.313666	0.545817
	54.2857	0.303392	0.105127	0.0384082	0.375306	0.214665	0.340714	0.284618	0.314744	0.118614	0.170917	0.341195	0.378259	0.339093	0.35556	0.306396	0.435323	0.2121	0.181669	0.143092	0.222041	0.155127	0.310161	0.261634	0.199178	0.375742	0.0410728	0.31868	0.237972	0.172671	0.104702	0.0649001	0.354741	0.267621	0.275449	0.44311	0.464408	0.427337	0.277807	0.429142	0.265142	0.226194	0.305168	0.279822	0.152081	0.173104	0.318664	0.309759	0.542663
	54.6939	0.300485	0.104719	0.0350708	0.372447	0.214556	0.340191	0.283682	0.315059	0.124988	0.168244	0.341148	0.373606	0.339601	0.35007	0.303649	0.435387	0.211677	0.187619	0.136862	0.220835	0.161244	0.309985	0.259144	0.195043	0.376491	0.0390882	0.317055	0.239235	0.178587	0.106032	0.0635988	0.35458	0.268813	0.271895	0.443851	0.465542	0.423408	0.273288	0.424986	0.264101	0.228404	0.305981	0.28111	0.148438	0.172826	0.319515	0.305877	0.539484
	55.102	0.297565	0.104478	0.0316664	0.369439	0.214514	0.339377	0.282681	0.315412	0.130997	0.165278	0.340816	0.368946	0.339963	0.344575	0.300861	0.435057	0.211282	0.193693	0.13079	0.220155	0.167428	0.310008	0.256587	0.1909	0.377081	0.0369493	0.315335	0.240638	0.184366	0.107307	0.0621453	0.354012	0.270286	0.268307	0.44438	0.466207	0.419562	0.268782	0.420914	0.263146	0.230842	0.306499	0.282417	0.144975	0.172768	0.320447	0.302048	0.536302
	55.5102	0.294643	0.104388	0.0282092	0.366292	0.214503	0.338277	0.281623	0.315815	0.136616	0.162014	0.340179	0.364289	0.34017	0.339113	0.298043	0.434315	0.210913	0.199838	0.124924	0.219973	0.173636	0.310228	0.253959	0.18676	0.377497	0.0346872	0.313525	0.242178	0.189963	0.108526	0.0605464	0.352987	0.272003	0.264707	0.444694	0.466402	0.415822	0.264285	0.416915	0.262262	0.233455	0.306689	0.283744	0.14171	0.172944	0.321462	0.298272	0.533128
	55.9184	0.2917	0.104447	0.0247314	0.363004	0.214493	0.336892	0.28051	0.31628	0.141835	0.158486	0.339214	0.359642	0.340199	0.333707	0.295214	0.433149	0.210558	0.206019	0.119315	0.220242	0.179817	0.310638	0.251257	0.182608	0.37773	0.0323415	0.311636	0.243854	0.195359	0.109691	0.0587966	0.351467	0.273936	0.261115	0.444773	0.466129	0.412211	0.259827	0.412987	0.261443	0.236203	0.306556	0.285087	0.13866	0.173363	0.322561	0.294559	0.52998
	56.3265	0.288756	0.104648	0.0212684	0.359586	0.214466	0.335236	0.279351	0.316819	0.146637	0.15472	0.33791	0.355014	0.340058	0.328373	0.292392	0.431556	0.210216	0.212196	0.114016	0.22091	0.185938	0.311231	0.248491	0.178453	0.377768	0.029979	0.309674	0.245664	0.200527	0.110806	0.0569087	0.349431	0.276052	0.257549	0.444636	0.465387	0.408747	0.255426	0.409133	0.260684	0.239037	0.306084	0.286452	0.135841	0.174035	0.323748	0.290924	0.526874
	56.7347	0.285791	0.104969	0.017877	0.356036	0.214393	0.333305	0.278145	0.317439	0.151009	0.150721	0.336243	0.350411	0.339714	0.323114	0.289581	0.429525	0.209873	0.218314	0.109081	0.221928	0.191944	0.311989	0.245649	0.174289	0.377604	0.0277042	0.307641	0.24761	0.205447	0.111875	0.0548943	0.346843	0.278312	0.254018	0.444253	0.464173	0.405443	0.251086	0.405339	0.259972	0.241917	0.305269	0.287831	0.133262	0.174958	0.325016	0.287354	0.523816
	57.1429	0.282821	0.105405	0.0146432	0.352359	0.214268	0.331116	0.2769	0.318149	0.154945	0.146541	0.334205	0.345839	0.339178	0.317932	0.286805	0.427061	0.209527	0.224346	0.104561	0.223228	0.197808	0.312899	0.242748	0.170112	0.377229	0.0256655	0.305539	0.249693	0.210107	0.1129	0.0527802	0.343702	0.280684	0.250536	0.443648	0.462487	0.40231	0.246847	0.401615	0.259308	0.244801	0.304116	0.289229	0.130934	0.176133	0.326365	0.283869	0.520819
	57.551	0.279851	0.105924	0.0117258	0.348562	0.214072	0.328675	0.275617	0.318951	0.158429	0.142177	0.331784	0.341305	0.338428	0.312821	0.284062	0.424158	0.209168	0.23023	0.100506	0.224765	0.203487	0.313941	0.23978	0.165933	0.376639	0.0240798	0.30336	0.251917	0.214481	0.113886	0.0506125	0.339988	0.283126	0.247108	0.442805	0.460326	0.399354	0.242695	0.397948	0.258679	0.247647	0.302612	0.290638	0.128864	0.177551	0.327784	0.280449	0.517882
	57.9592	0.276884	0.10652	0.00945016	0.344647	0.213804	0.325998	0.274306	0.31985	0.161462	0.137686	0.328971	0.336813	0.337461	0.307783	0.281372	0.420825	0.208788	0.235941	0.0969599	0.226471	0.208953	0.315099	0.23676	0.161739	0.375831	0.0232011	0.301102	0.254283	0.218569	0.114834	0.0484485	0.335712	0.285603	0.243747	0.441729	0.457694	0.39658	0.238671	0.394346	0.258088	0.250421	0.300777	0.292058	0.127063	0.179203	0.329264	0.277104	0.515012
	58.3674	0.273953	0.10717	0.00838019	0.340629	0.213457	0.323104	0.272977	0.320844	0.164032	0.133087	0.325769	0.332372	0.336284	0.302828	0.278741	0.417067	0.208386	0.241432	0.0939559	0.228297	0.214182	0.316356	0.233695	0.157544	0.374808	0.0232891	0.298755	0.256797	0.222347	0.115748	0.0463838	0.330883	0.288073	0.240463	0.440437	0.454598	0.393992	0.234773	0.390805	0.257524	0.253082	0.298603	0.293486	0.12554	0.181076	0.330796	0.273824	0.512204
	58.7755	0.271053	0.107863	0.00899131	0.336514	0.213031	0.320008	0.271639	0.321931	0.166143	0.128423	0.322172	0.327986	0.334881	0.297969	0.276181	0.412891	0.207952	0.24667	0.0915203	0.230188	0.219145	0.317695	0.230591	0.153342	0.373571	0.0244969	0.296317	0.259462	0.225815	0.116634	0.044527	0.325515	0.290499	0.23727	0.438911	0.451049	0.391598	0.231019	0.387326	0.256987	0.255599	0.296111	0.294913	0.124307	0.183151	0.332367	0.270601	0.509459
	59.1837	0.268219	0.108595	0.0110315	0.332322	0.212535	0.316741	0.270312	0.323108	0.167792	0.123749	0.318193	0.323664	0.333281	0.293233	0.273709	0.408316	0.20749	0.251634	0.0896604	0.23209	0.223838	0.319102	0.22747	0.149141	0.37213	0.0268318	0.293786	0.262281	0.228965	0.117497	0.0430282	0.319649	0.292844	0.234186	0.437188	0.447067	0.389405	0.227434	0.383919	0.256477	0.257939	0.293309	0.296341	0.123373	0.185413	0.33397	0.267442	0.506777
	59.5918	0.26545	0.10935	0.0139071	0.328067	0.211968	0.313318	0.269004	0.324368	0.168983	0.119086	0.313831	0.319412	0.331474	0.288648	0.27133	0.403352	0.206996	0.256286	0.088374	0.233964	0.228236	0.320562	0.224333	0.144946	0.370494	0.0301688	0.291167	0.265257	0.231793	0.118345	0.0420485	0.31331	0.29507	0.231221	0.435251	0.442672	0.38742	0.224014	0.380581	0.255988	0.260076	0.290212	0.297755	0.122747	0.187836	0.335593	0.264326	0.504155
	60	0.262759	0.110137	0.0172102	0.323767	0.211347	0.309769	0.267733	0.325706	0.169729	0.114512	0.3091	0.315237	0.329491	0.284243	0.269068	0.398024	0.20647	0.260624	0.0876399	0.235755	0.23234	0.322061	0.221205	0.140755	0.368677	0.034338	0.288469	0.268392	0.234309	0.119189	0.0417605	0.306555	0.297148	0.228394	0.433133	0.437891	0.385656	0.220801	0.377327	0.255527	0.261988	0.286853	0.299155	0.122437	0.190403	0.337234	0.261269	0.501596
	60.4082	0.260157	0.110941	0.020737	0.319441	0.210679	0.306111	0.266512	0.327111	0.170033	0.110044	0.304008	0.311144	0.327342	0.280043	0.266921	0.39235	0.205916	0.264619	0.0874248	0.237435	0.236136	0.323581	0.218089	0.136584	0.366693	0.0391797	0.285703	0.271684	0.236506	0.120039	0.0423157	0.299428	0.299042	0.22571	0.430835	0.432749	0.384118	0.217784	0.374156	0.255087	0.263656	0.283242	0.30053	0.122442	0.193086	0.338884	0.258252	0.499095
	60.8163	0.257632	0.111767	0.0243737	0.315101	0.20998	0.302367	0.265347	0.328575	0.169917	0.105747	0.298563	0.307138	0.325044	0.276062	0.264902	0.386356	0.20533	0.268274	0.0876847	0.238963	0.239619	0.325105	0.215001	0.132426	0.364558	0.0445609	0.282886	0.27513	0.238405	0.120907	0.043813	0.291988	0.300728	0.223178	0.428369	0.427271	0.382812	0.214998	0.371081	0.254678	0.265068	0.279424	0.301872	0.122759	0.195864	0.340538	0.255279	0.496654
	61.2245	0.255204	0.112604	0.0280575	0.310767	0.209266	0.298557	0.264251	0.330085	0.169392	0.101653	0.292779	0.303222	0.322628	0.272303	0.263012	0.38007	0.204718	0.271581	0.0883648	0.240313	0.24279	0.326614	0.211955	0.128297	0.36229	0.0503858	0.28003	0.278725	0.240005	0.121805	0.0462936	0.284302	0.302178	0.220796	0.425764	0.421482	0.381737	0.212446	0.368107	0.254296	0.26621	0.275418	0.303174	0.123376	0.198713	0.342191	0.252346	0.494265
	61.6327	0.252854	0.11344	0.0317463	0.306448	0.208549	0.294691	0.263221	0.331628	0.168477	0.0977902	0.286662	0.299398	0.320096	0.268757	0.261243	0.373516	0.204074	0.274537	0.0894105	0.241465	0.245636	0.328085	0.20895	0.124198	0.359905	0.056571	0.277148	0.282458	0.241322	0.122743	0.0497211	0.276426	0.30337	0.218556	0.423009	0.415398	0.380887	0.210135	0.365236	0.253945	0.267077	0.271266	0.304422	0.124275	0.201606	0.343834	0.249438	0.491923
	62.0408	0.250599	0.11427	0.0354143	0.302158	0.207852	0.290793	0.262265	0.333189	0.167195	0.0942087	0.28023	0.295666	0.317488	0.265404	0.259595	0.366728	0.203403	0.277158	0.0907605	0.242396	0.24817	0.329495	0.20601	0.120137	0.357423	0.0630574	0.274247	0.286316	0.242368	0.123731	0.0540255	0.268444	0.304284	0.216449	0.420148	0.409039	0.380249	0.208086	0.36248	0.253632	0.26766	0.267006	0.305613	0.125432	0.204524	0.345459	0.246562	0.489619
	62.449	0.24844	0.115066	0.0390508	0.297906	0.207185	0.28687	0.261378	0.33475	0.165563	0.0909064	0.273493	0.292027	0.314805	0.262219	0.258046	0.35973	0.2027	0.279437	0.0923613	0.243105	0.250379	0.330823	0.203127	0.116125	0.354862	0.0697862	0.271331	0.290284	0.243145	0.124775	0.0590978	0.260416	0.304897	0.214457	0.417168	0.402419	0.379804	0.206281	0.359834	0.253351	0.267953	0.262667	0.30673	0.126819	0.20744	0.34705	0.24369	0.487335
	62.8571	0.246383	0.115824	0.0426503	0.2937	0.20657	0.28294	0.260563	0.336293	0.163609	0.0879317	0.26647	0.28848	0.312076	0.259174	0.256591	0.35256	0.201967	0.281408	0.0941584	0.243574	0.25228	0.332047	0.20032	0.112161	0.352243	0.07671	0.268402	0.294343	0.243675	0.125882	0.064834	0.252431	0.305196	0.212568	0.4141	0.395555	0.379531	0.204746	0.357308	0.253115	0.267954	0.2583	0.307769	0.128405	0.210338	0.348598	0.240831	0.48506
	63.2653	0.24445	0.116518	0.0462216	0.289554	0.206019	0.279017	0.25982	0.3378	0.161352	0.0852713	0.259182	0.285023	0.309318	0.256245	0.255207	0.345246	0.201207	0.283073	0.0961051	0.243813	0.253876	0.333151	0.197591	0.108265	0.349587	0.0837847	0.265456	0.29847	0.243954	0.127055	0.0711264	0.244566	0.305162	0.210761	0.410955	0.388462	0.379404	0.203457	0.354898	0.252919	0.267653	0.25393	0.308717	0.130157	0.213194	0.350086	0.237961	0.482771
	63.6735	0.242637	0.117142	0.0497714	0.285473	0.205546	0.275111	0.259146	0.339251	0.158825	0.0829493	0.251647	0.281658	0.306545	0.253416	0.253883	0.337822	0.200416	0.284469	0.0981597	0.243817	0.25518	0.334116	0.194945	0.104434	0.346917	0.0909666	0.262493	0.302642	0.244005	0.128294	0.0778792	0.236903	0.304784	0.209025	0.407734	0.381161	0.379399	0.202427	0.352607	0.252769	0.267051	0.249611	0.309565	0.132047	0.215993	0.351499	0.235076	0.480455
	64.0816	0.240973	0.117684	0.0533133	0.281475	0.205168	0.271242	0.258547	0.340627	0.15605	0.0809595	0.243896	0.278384	0.303792	0.250681	0.252603	0.330324	0.199604	0.285622	0.100284	0.243589	0.256217	0.334934	0.192394	0.100685	0.344257	0.0982229	0.25951	0.306834	0.243831	0.129603	0.0850113	0.229536	0.30405	0.207347	0.404472	0.373675	0.379492	0.201645	0.350438	0.252668	0.266145	0.24537	0.310309	0.134046	0.218719	0.352825	0.232175	0.478092
	64.4898	0.239452	0.118132	0.0568561	0.277565	0.204889	0.267415	0.258017	0.341911	0.15306	0.079287	0.235949	0.275202	0.301063	0.248038	0.251351	0.322782	0.198771	0.286563	0.102448	0.243138	0.256994	0.335591	0.189931	0.0970235	0.34163	0.105515	0.256511	0.311017	0.243448	0.130981	0.0924434	0.222537	0.30295	0.205718	0.401156	0.366029	0.379664	0.201101	0.348385	0.252615	0.264936	0.241253	0.310934	0.136129	0.221356	0.35405	0.22924	0.475667
	64.898	0.238088	0.118494	0.0604049	0.273758	0.204725	0.263645	0.257562	0.343089	0.14989	0.0779362	0.227836	0.272112	0.298401	0.245495	0.250124	0.315239	0.197924	0.287342	0.104622	0.242461	0.257548	0.336081	0.187572	0.0934554	0.339059	0.112817	0.253503	0.315163	0.242876	0.132429	0.100119	0.216003	0.301482	0.204134	0.397823	0.358253	0.379897	0.200805	0.346456	0.252616	0.263431	0.237298	0.311441	0.138278	0.223895	0.355169	0.226286	0.47317
	65.3061	0.236879	0.118753	0.0639627	0.270063	0.204675	0.259934	0.257176	0.344145	0.146569	0.0768599	0.219582	0.269114	0.295812	0.243059	0.248901	0.307725	0.197067	0.287987	0.106785	0.241573	0.257889	0.336394	0.185303	0.0899967	0.336567	0.120097	0.250493	0.319242	0.242124	0.133947	0.107975	0.209995	0.299641	0.202586	0.394464	0.350373	0.380177	0.20073	0.34464	0.252668	0.261635	0.233534	0.311818	0.140471	0.226323	0.356171	0.223295	0.470588
	65.7143	0.235816	0.118919	0.0675229	0.266487	0.204747	0.256286	0.256856	0.345068	0.143139	0.0760598	0.211211	0.266207	0.293326	0.240733	0.247684	0.300282	0.196205	0.288558	0.108915	0.240469	0.258049	0.336521	0.183131	0.0866438	0.334173	0.127328	0.247497	0.323221	0.241222	0.135535	0.11597	0.204589	0.297433	0.201071	0.3911	0.342418	0.38049	0.200895	0.342944	0.252777	0.259564	0.230009	0.312064	0.142693	0.228633	0.357056	0.220283	0.467918
	66.1225	0.234907	0.118979	0.0710825	0.263039	0.204938	0.252703	0.256597	0.345849	0.13963	0.07548	0.20275	0.263391	0.290962	0.238515	0.246454	0.292942	0.195344	0.289086	0.110997	0.239164	0.258046	0.336454	0.181046	0.0834162	0.331895	0.134484	0.244526	0.32707	0.240178	0.137192	0.124057	0.199833	0.294861	0.19958	0.387743	0.334413	0.380823	0.201271	0.341359	0.252937	0.257227	0.226738	0.312175	0.144925	0.230817	0.357818	0.217245	0.46515
	66.5306	0.234129	0.118929	0.0746319	0.259715	0.205245	0.249175	0.256383	0.346481	0.136084	0.0751016	0.194219	0.260663	0.288726	0.23639	0.245207	0.285739	0.194482	0.289623	0.113017	0.237663	0.2579	0.336182	0.179039	0.0803094	0.329748	0.141531	0.241593	0.330755	0.239021	0.138915	0.132195	0.195764	0.291935	0.198104	0.384384	0.326378	0.38116	0.201867	0.33988	0.253152	0.254646	0.223762	0.312148	0.14715	0.232868	0.358456	0.214182	0.462283
	66.9388	0.233493	0.11876	0.078168	0.256518	0.205666	0.245701	0.256209	0.346957	0.132533	0.0748844	0.185646	0.258019	0.286646	0.234336	0.243931	0.278713	0.193628	0.29021	0.114964	0.235972	0.257636	0.335696	0.177106	0.0773354	0.327743	0.148442	0.238708	0.334245	0.237766	0.140702	0.14035	0.192407	0.288667	0.19663	0.381053	0.318333	0.381483	0.202672	0.338506	0.253418	0.251833	0.221092	0.311986	0.149347	0.234784	0.358967	0.211105	0.459311
	67.3469	0.232983	0.118451	0.0816895	0.253441	0.206185	0.242267	0.256054	0.347272	0.129013	0.0747832	0.177051	0.255457	0.284708	0.232322	0.242609	0.271887	0.192777	0.290878	0.116832	0.234108	0.257262	0.334987	0.175226	0.0744975	0.325887	0.155178	0.235876	0.337506	0.236426	0.142545	0.148476	0.189751	0.285069	0.195141	0.377726	0.310291	0.381771	0.203667	0.33722	0.253731	0.248808	0.218747	0.311686	0.151494	0.236557	0.359347	0.208002	0.456226
	67.7551	0.232601	0.118	0.0851995	0.250479	0.206797	0.23887	0.255908	0.347424	0.12556	0.0747828	0.168461	0.252972	0.282932	0.23032	0.241239	0.265298	0.191932	0.291674	0.118612	0.232074	0.256806	0.334048	0.173397	0.0717945	0.324185	0.161707	0.233099	0.340506	0.235024	0.14444	0.156541	0.187789	0.281162	0.193625	0.37443	0.302266	0.382002	0.204862	0.336022	0.254091	0.245588	0.216739	0.311254	0.153571	0.23819	0.359594	0.20489	0.453028
	68.1633	0.232349	0.11738	0.0887097	0.247625	0.207482	0.235496	0.255756	0.347409	0.122199	0.0748261	0.159904	0.25056	0.281305	0.2283	0.239802	0.258968	0.191095	0.29261	0.120303	0.229893	0.256274	0.332874	0.171597	0.069238	0.322639	0.167992	0.230374	0.343216	0.233564	0.146376	0.164498	0.186471	0.276957	0.192066	0.371151	0.294269	0.382153	0.20622	0.334892	0.254487	0.24219	0.215058	0.310692	0.155557	0.239677	0.359699	0.201757	0.449705
	68.5714	0.232214	0.116588	0.0922299	0.244867	0.208228	0.232138	0.255583	0.347227	0.118966	0.0749137	0.151404	0.24822	0.279826	0.226243	0.238298	0.252923	0.190264	0.293721	0.121901	0.227566	0.255689	0.331465	0.169819	0.0668172	0.321248	0.173997	0.227697	0.345607	0.232069	0.148344	0.172313	0.185752	0.272479	0.190455	0.36789	0.286315	0.382203	0.207755	0.333827	0.254919	0.238633	0.213714	0.310007	0.157436	0.24102	0.35966	0.198614	0.44626
	68.9796	0.232208	0.11561	0.0957778	0.242204	0.209015	0.228791	0.255382	0.346877	0.11588	0.0750037	0.142993	0.245948	0.278496	0.224142	0.236718	0.247184	0.189443	0.295013	0.123403	0.22511	0.255065	0.329823	0.168052	0.0645442	0.320009	0.179694	0.225063	0.347654	0.230543	0.150336	0.179945	0.185562	0.267745	0.188786	0.364655	0.278421	0.382134	0.209434	0.332813	0.255376	0.234936	0.212677	0.309208	0.159193	0.24222	0.359473	0.195462	0.442686
	69.3878	0.232308	0.114441	0.0993639	0.239623	0.209822	0.225443	0.255141	0.34636	0.112971	0.0750948	0.134697	0.243744	0.277292	0.221999	0.235064	0.241767	0.188632	0.296498	0.124807	0.222534	0.254411	0.327952	0.166279	0.0624083	0.318915	0.185051	0.222468	0.349332	0.229003	0.152341	0.187358	0.185821	0.26278	0.187058	0.361425	0.270604	0.381935	0.211258	0.331839	0.255853	0.231121	0.211944	0.308301	0.160823	0.243277	0.359134	0.1923	0.438987
	69.7959	0.232514	0.113084	0.102999	0.237123	0.210632	0.222094	0.254856	0.345682	0.110256	0.0751807	0.126547	0.241607	0.276227	0.219829	0.233345	0.236689	0.187836	0.298179	0.12611	0.219837	0.253749	0.32586	0.164499	0.0604125	0.317958	0.190049	0.21991	0.350621	0.227463	0.154353	0.194526	0.186457	0.257607	0.18528	0.358221	0.262885	0.381601	0.213217	0.330901	0.256343	0.227211	0.211482	0.307301	0.162323	0.244196	0.358647	0.189149	0.435167
	70.2041	0.232805	0.111531	0.106685	0.234696	0.211417	0.21873	0.254518	0.344846	0.107752	0.0752481	0.118568	0.239535	0.275274	0.217651	0.231561	0.231957	0.187056	0.300042	0.127309	0.217034	0.253078	0.323554	0.162689	0.0585538	0.31713	0.194662	0.21739	0.351504	0.225933	0.156365	0.201417	0.187374	0.252251	0.183457	0.355015	0.255286	0.381127	0.21529	0.329983	0.256833	0.223232	0.211266	0.306216	0.163694	0.244977	0.358011	0.186001	0.431234
	70.6122	0.233158	0.109796	0.110417	0.232337	0.212162	0.215348	0.254122	0.34386	0.105476	0.0753235	0.110785	0.237528	0.274439	0.215483	0.229734	0.227582	0.186293	0.302084	0.128398	0.214117	0.252418	0.321043	0.160853	0.0568222	0.316416	0.198875	0.214917	0.351967	0.224435	0.158374	0.208018	0.188499	0.246746	0.181605	0.351822	0.24783	0.38052	0.217489	0.329085	0.257322	0.219214	0.21127	0.305062	0.164942	0.245627	0.357236	0.182882	0.427204
	71.0204	0.23356	0.10787	0.114187	0.230043	0.212841	0.211937	0.25366	0.342731	0.103433	0.0753886	0.103225	0.235586	0.273705	0.21334	0.227866	0.223561	0.185551	0.30427	0.129373	0.211096	0.251761	0.318333	0.158972	0.0552229	0.315801	0.202671	0.212494	0.351997	0.222975	0.160375	0.214306	0.189743	0.241117	0.179734	0.348627	0.240535	0.379783	0.219784	0.328193	0.257794	0.215184	0.211452	0.303852	0.166071	0.246146	0.356329	0.179791	0.423088
	71.4286	0.233969	0.105762	0.117975	0.227803	0.213432	0.208488	0.253123	0.341471	0.101636	0.0754783	0.095906	0.233705	0.273063	0.211226	0.225979	0.219895	0.184826	0.306587	0.130227	0.207966	0.251112	0.315431	0.157041	0.0537383	0.315269	0.206029	0.210132	0.351587	0.221574	0.162369	0.220273	0.191032	0.235401	0.177858	0.345425	0.233418	0.378923	0.222191	0.327305	0.258244	0.211176	0.211794	0.302601	0.167089	0.246542	0.355299	0.176743	0.418906
	71.8367	0.234377	0.103469	0.121764	0.225613	0.213916	0.204995	0.252504	0.340087	0.10008	0.0755869	0.088855	0.231883	0.27251	0.209137	0.224081	0.216578	0.184122	0.308989	0.130955	0.204732	0.250466	0.312345	0.155055	0.0523748	0.314799	0.208934	0.207836	0.35073	0.220237	0.164354	0.225907	0.192294	0.229629	0.175983	0.342222	0.226494	0.377944	0.224688	0.326412	0.258662	0.207216	0.212246	0.301327	0.168	0.246814	0.354159	0.17375	0.414673
	72.2449	0.234746	0.100983	0.125533	0.223459	0.214267	0.201444	0.251789	0.338591	0.0987703	0.075733	0.0820895	0.230117	0.272016	0.207059	0.222181	0.213596	0.183432	0.311441	0.131553	0.2014	0.249807	0.30908	0.152999	0.051118	0.31437	0.211365	0.205612	0.349423	0.218976	0.166329	0.231195	0.193456	0.223836	0.174116	0.338991	0.21977	0.376848	0.227273	0.325504	0.259037	0.203335	0.212788	0.300042	0.168806	0.246967	0.352916	0.170811	0.410408
	72.6531	0.235063	0.0983095	0.129266	0.221333	0.214472	0.197836	0.250971	0.336992	0.0976998	0.0759361	0.075635	0.228405	0.271587	0.204976	0.220295	0.210938	0.182755	0.313898	0.132013	0.197967	0.249132	0.305644	0.15088	0.0499681	0.313959	0.213303	0.203462	0.347669	0.217801	0.168296	0.236134	0.194466	0.218058	0.172262	0.335751	0.213254	0.375635	0.229942	0.324581	0.259362	0.199559	0.213381	0.298766	0.169509	0.247005	0.351582	0.167945	0.406128
	73.0612	0.235307	0.0954329	0.13295	0.219223	0.214506	0.194163	0.250039	0.335296	0.0968598	0.0761933	0.0695139	0.226742	0.271189	0.202869	0.218422	0.208578	0.182089	0.316305	0.132336	0.194451	0.248415	0.302048	0.148684	0.0489221	0.313544	0.214729	0.20138	0.34547	0.216706	0.170252	0.240707	0.195259	0.212324	0.170424	0.332473	0.206948	0.374303	0.232671	0.323625	0.259624	0.19591	0.213994	0.297512	0.170108	0.246928	0.350162	0.165141	0.401843
	73.4694	0.235456	0.0923633	0.136578	0.217119	0.214354	0.190427	0.248986	0.333512	0.0962469	0.0765449	0.0637498	0.225127	0.27082	0.20073	0.21658	0.2065	0.181428	0.318622	0.132515	0.190848	0.24765	0.298302	0.146422	0.0479721	0.313103	0.215626	0.199365	0.342834	0.215706	0.172199	0.244913	0.195797	0.206672	0.168612	0.329164	0.200857	0.372852	0.235468	0.322639	0.259818	0.192412	0.214602	0.296297	0.170607	0.246742	0.348666	0.162418	0.397574
	73.8776	0.235508	0.089094	0.140149	0.215015	0.214	0.186632	0.247809	0.331645	0.0958456	0.0769838	0.058371	0.223556	0.27046	0.198559	0.214768	0.204674	0.180773	0.320784	0.132552	0.187172	0.246813	0.294422	0.144091	0.0471274	0.312615	0.215985	0.197405	0.339774	0.214791	0.174136	0.248742	0.196034	0.201126	0.166833	0.325816	0.194983	0.37128	0.238298	0.321611	0.259931	0.189081	0.215165	0.295136	0.171009	0.246445	0.347099	0.159769	0.39333
	74.2857	0.23543	0.0856353	0.14366	0.212901	0.213426	0.18278	0.246502	0.329698	0.0956543	0.0775515	0.0533992	0.222031	0.270093	0.196368	0.213	0.203074	0.180118	0.322751	0.132443	0.18343	0.245892	0.290422	0.1417	0.0463773	0.312059	0.215795	0.195494	0.336305	0.21397	0.176064	0.252192	0.195938	0.195718	0.165104	0.322415	0.18933	0.369592	0.241166	0.320538	0.259956	0.185936	0.215672	0.29404	0.171321	0.246043	0.345467	0.1572	0.389129
	74.6939	0.235226	0.082	0.147116	0.21078	0.212625	0.178886	0.245071	0.327676	0.0956613	0.0782596	0.0488632	0.220549	0.269722	0.19418	0.211283	0.201674	0.179467	0.324464	0.132189	0.179623	0.244873	0.286321	0.139263	0.0457369	0.311417	0.215058	0.193625	0.332448	0.21324	0.177986	0.255266	0.19549	0.190473	0.163444	0.318976	0.183905	0.367796	0.244048	0.31942	0.259887	0.182989	0.216085	0.293027	0.171555	0.245536	0.34378	0.154723	0.384985
	75.102	0.234867	0.0781965	0.150515	0.208646	0.211579	0.174954	0.243513	0.325581	0.0958653	0.0791317	0.044782	0.219111	0.269325	0.19202	0.209624	0.200439	0.178817	0.32588	0.131788	0.175766	0.243736	0.282135	0.136783	0.045202	0.310675	0.213772	0.191795	0.328224	0.2126	0.179906	0.257968	0.194662	0.185414	0.161878	0.31547	0.178714	0.365903	0.24693	0.318247	0.259713	0.180252	0.216392	0.292101	0.171724	0.244927	0.342044	0.152329	0.380914
	75.5102	0.234342	0.0742535	0.153855	0.206504	0.210285	0.171002	0.241834	0.323416	0.0962661	0.0802041	0.0411754	0.217717	0.268916	0.18992	0.208041	0.199347	0.178168	0.326959	0.131239	0.171855	0.242479	0.277881	0.134286	0.0447849	0.309817	0.211946	0.190004	0.323661	0.212059	0.181829	0.260318	0.193455	0.180565	0.160432	0.31192	0.173766	0.36393	0.24981	0.317029	0.259434	0.177734	0.216574	0.291278	0.171845	0.244221	0.340273	0.150041	0.376938
	75.9184	0.233636	0.0701799	0.157128	0.204355	0.208732	0.167037	0.240034	0.321183	0.0968627	0.0814786	0.0380539	0.216367	0.268481	0.187903	0.206532	0.198363	0.177521	0.327653	0.130542	0.167906	0.241078	0.273575	0.131777	0.0444937	0.308832	0.209587	0.188253	0.31879	0.211609	0.183762	0.262326	0.19185	0.175942	0.159126	0.308308	0.169065	0.361892	0.252658	0.315756	0.259037	0.17544	0.216612	0.290562	0.171933	0.243416	0.338478	0.147849	0.373071
	76.3265	0.232727	0.0660069	0.160319	0.202198	0.206915	0.163073	0.238116	0.318883	0.097667	0.0829998	0.0354166	0.215059	0.268033	0.185982	0.205112	0.197466	0.176873	0.327941	0.129694	0.163921	0.239531	0.269228	0.129283	0.0443328	0.307708	0.206702	0.18655	0.313641	0.211257	0.185713	0.26402	0.189854	0.171564	0.157985	0.30464	0.164614	0.359806	0.255482	0.314436	0.258524	0.173374	0.216506	0.289958	0.172006	0.242518	0.336673	0.14577	0.369336
	76.7347	0.231617	0.0617503	0.163416	0.20004	0.204832	0.159128	0.236081	0.316518	0.0986808	0.0847601	0.0332537	0.213793	0.267574	0.184164	0.203777	0.196625	0.176225	0.32778	0.128697	0.159913	0.237821	0.264854	0.126818	0.0443214	0.306435	0.203302	0.1849	0.308251	0.210997	0.187691	0.265424	0.187465	0.167441	0.15702	0.300923	0.160414	0.357687	0.258251	0.313067	0.257886	0.17153	0.216235	0.289471	0.172075	0.241528	0.334872	0.143803	0.365746
	77.1429	0.230283	0.0574341	0.166402	0.197875	0.202477	0.15521	0.233924	0.314087	0.0999202	0.0867861	0.0315327	0.212565	0.267102	0.18244	0.20253	0.195817	0.175571	0.327157	0.127551	0.155901	0.235939	0.26046	0.124403	0.0444573	0.305005	0.199391	0.183312	0.302657	0.210826	0.189701	0.266562	0.184684	0.163584	0.15624	0.297141	0.15646	0.355544	0.260967	0.311648	0.257124	0.169904	0.215811	0.289099	0.172151	0.240449	0.333087	0.141945	0.362318
	77.551	0.228739	0.0530881	0.169265	0.195708	0.199856	0.151343	0.231648	0.311592	0.101393	0.089078	0.0302135	0.211374	0.266637	0.1808	0.201366	0.195022	0.174912	0.326046	0.126256	0.151895	0.233877	0.256058	0.122065	0.0447617	0.30341	0.194982	0.181789	0.296898	0.210742	0.191751	0.267465	0.181526	0.159998	0.155651	0.293322	0.152746	0.353384	0.263609	0.310183	0.256234	0.16848	0.215219	0.288845	0.172238	0.239283	0.331332	0.140207	0.359062
	77.9592	0.22698	0.0487347	0.171997	0.193533	0.196965	0.14754	0.229247	0.309029	0.103111	0.0916299	0.0292341	0.210218	0.266165	0.179229	0.20027	0.194214	0.174242	0.324434	0.124821	0.147925	0.23162	0.251655	0.119816	0.0452316	0.301645	0.190081	0.180331	0.291014	0.210731	0.193845	0.268153	0.177989	0.156683	0.155248	0.28944	0.149259	0.351207	0.266158	0.308665	0.255213	0.167241	0.214468	0.288698	0.17234	0.238034	0.329614	0.138571	0.355984
	78.3674	0.225019	0.0444249	0.174599	0.191351	0.193812	0.143826	0.226723	0.306397	0.105087	0.0944556	0.0285298	0.209095	0.265707	0.177718	0.199238	0.193379	0.173558	0.32232	0.123246	0.144002	0.229174	0.247261	0.117694	0.0458789	0.299706	0.1847	0.178939	0.285049	0.210791	0.195987	0.268656	0.174098	0.153637	0.155034	0.285521	0.145991	0.349013	0.268609	0.307102	0.254065	0.166165	0.213559	0.288659	0.172456	0.236707	0.327941	0.13705	0.35309
	78.7755	0.222879	0.0402015	0.177078	0.189164	0.190402	0.140222	0.224077	0.303692	0.107325	0.097526	0.0280289	0.208003	0.265255	0.176267	0.198246	0.192491	0.172861	0.31969	0.121543	0.140158	0.226526	0.242884	0.115711	0.0467051	0.297591	0.178857	0.177606	0.279047	0.210905	0.198176	0.268995	0.169863	0.150848	0.155005	0.281557	0.142927	0.346798	0.270926	0.305488	0.252782	0.165226	0.21249	0.288716	0.172586	0.235303	0.326317	0.135626	0.350375
	79.1837	0.220569	0.0361477	0.179448	0.18697	0.18674	0.136752	0.22131	0.300908	0.109837	0.100857	0.027663	0.206942	0.264819	0.174883	0.197287	0.191542	0.172144	0.316562	0.119717	0.136411	0.223687	0.238535	0.113901	0.0477066	0.295302	0.172569	0.176326	0.273052	0.211069	0.200411	0.269196	0.165308	0.148309	0.155165	0.277552	0.14006	0.344562	0.273109	0.303826	0.251373	0.164397	0.211275	0.288859	0.172731	0.233831	0.324746	0.134299	0.347842
	79.5918	0.218128	0.0323604	0.181731	0.184777	0.182841	0.133446	0.218433	0.298042	0.112623	0.104422	0.0273734	0.205911	0.264408	0.173586	0.196339	0.190512	0.171413	0.312937	0.11778	0.132779	0.220662	0.234223	0.112285	0.0488892	0.292843	0.165864	0.175092	0.26711	0.21127	0.202692	0.269284	0.160464	0.145999	0.155516	0.273524	0.137382	0.342304	0.275124	0.302119	0.249834	0.163644	0.209907	0.289078	0.172888	0.232296	0.32323	0.133069	0.345482
	80	0.215566	0.0289799	0.183951	0.182589	0.17871	0.130323	0.215446	0.295089	0.115688	0.108221	0.0271048	0.204913	0.264018	0.1724	0.195391	0.189389	0.170665	0.308845	0.115741	0.129289	0.217462	0.229958	0.110883	0.0502364	0.290218	0.158771	0.173898	0.261265	0.2115	0.205013	0.269283	0.155356	0.143903	0.15606	0.269458	0.134889	0.340025	0.27696	0.300367	0.24817	0.162942	0.208403	0.289357	0.173063	0.230705	0.321769	0.13192	0.343291
	80.4082	0.212925	0.0261893	0.186132	0.180416	0.174367	0.127414	0.212364	0.292045	0.119034	0.112244	0.0268195	0.203946	0.263674	0.171351	0.194433	0.188167	0.169902	0.304309	0.113609	0.125949	0.21411	0.225746	0.109722	0.0517526	0.287438	0.151323	0.172741	0.255563	0.211754	0.207373	0.269224	0.150031	0.141997	0.156803	0.265388	0.132583	0.337731	0.278603	0.298579	0.246386	0.16226	0.206764	0.289687	0.173257	0.229069	0.320366	0.130867	0.341264
	80.8163	0.210225	0.024192	0.188297	0.178266	0.169822	0.124733	0.209189	0.288908	0.122653	0.116469	0.0264815	0.203012	0.263369	0.170462	0.193446	0.186831	0.169126	0.299366	0.111395	0.122785	0.210619	0.221593	0.10881	0.0534175	0.284512	0.143557	0.171621	0.250044	0.212019	0.209766	0.269132	0.144518	0.14026	0.157739	0.261298	0.13046	0.335428	0.280027	0.296752	0.244481	0.16157	0.205	0.290046	0.173475	0.227394	0.319021	0.129888	0.339392
	81.2245	0.207496	0.0231906	0.190464	0.176148	0.165096	0.122301	0.20593	0.285677	0.126548	0.120901	0.0260688	0.202109	0.26313	0.169746	0.192429	0.185382	0.168336	0.294067	0.109107	0.119809	0.207023	0.217503	0.108167	0.0552268	0.28145	0.135505	0.17054	0.244748	0.212297	0.212188	0.269038	0.138872	0.138672	0.158864	0.257213	0.128524	0.333122	0.281236	0.294897	0.242468	0.160848	0.203124	0.290424	0.173721	0.225696	0.317739	0.128996	0.337673
	81.6326	0.204779	0.0232717	0.192647	0.174073	0.160208	0.120132	0.202593	0.282353	0.130702	0.1255	0.0255628	0.201238	0.262956	0.169207	0.191363	0.183809	0.167537	0.288457	0.106754	0.117037	0.20334	0.213478	0.107792	0.0571654	0.278265	0.12721	0.169503	0.23971	0.212573	0.214634	0.268967	0.133138	0.137207	0.160161	0.253139	0.126771	0.330815	0.282198	0.293013	0.240345	0.160067	0.20114	0.290802	0.173997	0.223982	0.316521	0.128178	0.336094
	82.0408	0.202095	0.0243911	0.194856	0.172043	0.155175	0.11823	0.199177	0.278937	0.135109	0.130266	0.0249495	0.200397	0.262858	0.168836	0.190245	0.182116	0.166723	0.282608	0.104345	0.114491	0.199605	0.209515	0.107691	0.0592165	0.274968	0.118704	0.168517	0.23496	0.212844	0.217096	0.268944	0.127368	0.13585	0.161612	0.249076	0.125198	0.32851	0.28292	0.291107	0.238125	0.159207	0.199072	0.291162	0.174302	0.222269	0.315371	0.127427	0.334651
	82.449	0.199499	0.0263545	0.197101	0.17007	0.150027	0.116604	0.19569	0.275434	0.13975	0.135161	0.0242229	0.199584	0.262849	0.168616	0.189059	0.180298	0.165897	0.276578	0.101889	0.112177	0.195845	0.205614	0.107857	0.0613737	0.271572	0.110028	0.167584	0.230523	0.2131	0.219566	0.268992	0.121625	0.134577	0.163191	0.245053	0.1238	0.3262	0.283381	0.289182	0.235811	0.158243	0.196919	0.29149	0.174632	0.220567	0.31429	0.126746	0.333329
	82.8572	0.197017	0.0289415	0.199386	0.168154	0.144781	0.115247	0.192127	0.271847	0.144607	0.140161	0.0233743	0.198796	0.262919	0.168525	0.187794	0.178354	0.165055	0.27045	0.0993943	0.110117	0.192089	0.20177	0.108277	0.0636113	0.268088	0.101223	0.166709	0.226418	0.21333	0.222033	0.26912	0.115964	0.133376	0.164869	0.241054	0.122564	0.323877	0.283571	0.287234	0.23341	0.157157	0.194705	0.291767	0.174981	0.218891	0.313277	0.126108	0.332117
	83.2653	0.194704	0.0319352	0.201723	0.166299	0.139471	0.114158	0.188496	0.268183	0.14966	0.145247	0.0224055	0.198032	0.263084	0.168544	0.186439	0.17629	0.164195	0.264303	0.0968702	0.108312	0.188377	0.197981	0.108943	0.0659265	0.26453	0.0923377	0.165889	0.222656	0.213529	0.224485	0.269344	0.110465	0.132227	0.166625	0.237112	0.12148	0.321529	0.283489	0.285273	0.230934	0.155927	0.192436	0.29198	0.17534	0.217256	0.312331	0.125522	0.330999
	83.6735	0.192597	0.0351725	0.204121	0.164512	0.134121	0.113322	0.184795	0.264444	0.154881	0.150371	0.0213147	0.197288	0.263323	0.168654	0.184976	0.174101	0.163317	0.25822	0.0943285	0.106765	0.184731	0.194247	0.109827	0.0682945	0.260909	0.0834313	0.165119	0.219242	0.213678	0.226908	0.26966	0.105194	0.131119	0.168431	0.233217	0.120536	0.319141	0.283107	0.283292	0.228384	0.154535	0.190122	0.292108	0.175698	0.215674	0.311445	0.124961	0.329956
	84.0816	0.190739	0.0385291	0.206594	0.162793	0.128762	0.112727	0.181032	0.26064	0.16025	0.155528	0.0201078	0.196563	0.263642	0.168849	0.183402	0.171795	0.162417	0.252301	0.0917768	0.105475	0.181198	0.190565	0.110917	0.0707076	0.25724	0.0745742	0.164391	0.216175	0.213777	0.229284	0.270072	0.10024	0.13004	0.170272	0.229383	0.119722	0.316701	0.282436	0.281297	0.225775	0.152965	0.187779	0.292143	0.176046	0.214161	0.310614	0.124424	0.328972
	84.4898	0.189175	0.0419064	0.209162	0.161154	0.123433	0.112357	0.177216	0.256774	0.165735	0.160671	0.0187923	0.195857	0.264027	0.16913	0.181702	0.169369	0.161499	0.246629	0.0892263	0.104422	0.177803	0.186939	0.11218	0.0731512	0.253537	0.0658677	0.163692	0.213446	0.213812	0.231597	0.270571	0.0956883	0.128976	0.172131	0.225627	0.119029	0.314194	0.281447	0.279288	0.22311	0.1512	0.185405	0.292066	0.176377	0.212728	0.309827	0.1239	0.328023
	84.898	0.187928	0.045242	0.21184	0.159598	0.118162	0.112188	0.17335	0.252854	0.171315	0.165791	0.0173757	0.195167	0.264465	0.169503	0.179876	0.16683	0.16056	0.241312	0.086685	0.103599	0.174589	0.183369	0.113599	0.0756078	0.249814	0.0574408	0.163012	0.21104	0.213779	0.233829	0.271146	0.0916253	0.12792	0.173998	0.221936	0.11845	0.311614	0.280148	0.277266	0.220401	0.149232	0.183019	0.291865	0.176686	0.211392	0.309076	0.123375	0.327094
	85.3061	0.187038	0.0484711	0.214648	0.158138	0.112996	0.112201	0.169452	0.24889	0.176963	0.170862	0.0158725	0.194493	0.264955	0.169981	0.17792	0.164181	0.159603	0.236433	0.0841597	0.102977	0.171589	0.179861	0.115146	0.0780747	0.246086	0.0494884	0.162338	0.208938	0.213675	0.235964	0.271788	0.0881439	0.126862	0.175863	0.218345	0.117984	0.308956	0.278528	0.275236	0.217658	0.147051	0.180617	0.291532	0.176973	0.210163	0.308351	0.122857	0.326165
	85.7143	0.186507	0.0515617	0.217595	0.156782	0.107968	0.112365	0.165526	0.244888	0.182652	0.175855	0.0142912	0.193833	0.265473	0.170573	0.175837	0.161424	0.158629	0.23209	0.0816577	0.10254	0.168832	0.176418	0.116794	0.0805291	0.242366	0.0422979	0.161661	0.207112	0.213491	0.237985	0.272481	0.0853109	0.125795	0.177714	0.214836	0.117623	0.306217	0.276584	0.273194	0.214886	0.144654	0.178212	0.29105	0.177238	0.209053	0.307641	0.122323	0.325222
	86.1225	0.186353	0.0544745	0.220689	0.155541	0.103127	0.112659	0.161585	0.24086	0.188364	0.180767	0.0126467	0.193187	0.266024	0.171283	0.173635	0.15857	0.157639	0.228363	0.0791806	0.102264	0.166353	0.173046	0.118526	0.0829727	0.23867	0.036308	0.160974	0.205532	0.213234	0.239878	0.273218	0.0831957	0.124714	0.17954	0.211437	0.117366	0.303401	0.27433	0.271152	0.212101	0.142043	0.175809	0.290416	0.177488	0.208073	0.306942	0.121784	0.324254
	86.5306	0.186567	0.0571904	0.223927	0.154424	0.0985164	0.113048	0.157636	0.236818	0.194068	0.185556	0.0109497	0.192551	0.266586	0.172106	0.171316	0.155619	0.156634	0.22532	0.0767328	0.102122	0.164167	0.169751	0.12031	0.0853874	0.235008	0.0321362	0.160272	0.204166	0.212895	0.241629	0.273979	0.0818221	0.123612	0.181323	0.208147	0.117206	0.300507	0.271752	0.269103	0.209306	0.139217	0.173408	0.289617	0.177727	0.207229	0.306243	0.121227	0.323247
	86.9388	0.187137	0.0596945	0.227296	0.153437	0.0941812	0.113505	0.153682	0.232774	0.199747	0.190219	0.0092117	0.191924	0.267155	0.173026	0.168897	0.152582	0.155611	0.223022	0.0743125	0.102103	0.162298	0.166538	0.122132	0.0877697	0.231391	0.0304278	0.159556	0.202977	0.212481	0.243227	0.274754	0.0811997	0.122491	0.183045	0.204968	0.117131	0.297537	0.268878	0.267053	0.206515	0.136185	0.171026	0.288649	0.177964	0.206529	0.305542	0.120649	0.322196
	87.3469	0.188048	0.0619716	0.230777	0.152589	0.0901733	0.114002	0.149732	0.228741	0.205375	0.194719	0.00744932	0.191302	0.26772	0.174016	0.166378	0.149464	0.154572	0.221492	0.07192	0.102176	0.160745	0.163414	0.123963	0.0901141	0.22783	0.0314527	0.158823	0.201927	0.211985	0.244661	0.27553	0.0812949	0.121345	0.184684	0.201923	0.117131	0.29449	0.265702	0.265001	0.203735	0.132951	0.168656	0.287505	0.178202	0.205973	0.304833	0.120053	0.321088
	87.7551	0.189261	0.0640241	0.234341	0.151877	0.0865332	0.114507	0.145785	0.224733	0.210929	0.199037	0.00568135	0.19068	0.268261	0.175043	0.163772	0.146273	0.153511	0.220757	0.0695531	0.102328	0.159513	0.160386	0.125787	0.0924074	0.224329	0.0348175	0.158071	0.200977	0.21141	0.245918	0.276287	0.0820453	0.12018	0.186221	0.198993	0.117188	0.291358	0.262244	0.262943	0.200975	0.129524	0.166314	0.286179	0.178447	0.205566	0.304113	0.11942	0.319919
	88.1633	0.190759	0.0658383	0.237957	0.151306	0.0833118	0.114997	0.141849	0.220763	0.216389	0.203155	0.00396204	0.190055	0.268775	0.176075	0.161084	0.143017	0.152428	0.220793	0.0672081	0.102534	0.158589	0.157464	0.127585	0.0946554	0.220896	0.0397872	0.157296	0.200093	0.210755	0.246989	0.277013	0.0833711	0.118993	0.18764	0.196211	0.117287	0.288137	0.258516	0.260884	0.198247	0.125912	0.163995	0.284671	0.1787	0.205303	0.303379	0.118763	0.318678
	88.5714	0.192492	0.0674202	0.241589	0.150871	0.0805419	0.115443	0.137925	0.216841	0.221729	0.207039	0.00246634	0.189424	0.269229	0.17708	0.158317	0.139701	0.151318	0.221575	0.0648846	0.10277	0.157953	0.15466	0.129337	0.0968414	0.217531	0.0456899	0.156492	0.199235	0.210014	0.247862	0.277682	0.0851621	0.117789	0.188925	0.193558	0.117412	0.284815	0.254524	0.258813	0.195553	0.122123	0.161707	0.282975	0.178962	0.205179	0.302623	0.118062	0.317355
	88.9796	0.194433	0.0687607	0.245207	0.150572	0.0782588	0.115829	0.134021	0.21298	0.226933	0.210691	0.00192165	0.188781	0.269621	0.178035	0.155483	0.136335	0.150178	0.223044	0.0625769	0.103021	0.157583	0.151986	0.131034	0.0989726	0.214239	0.0520687	0.155646	0.198372	0.209195	0.248527	0.278281	0.0873202	0.116569	0.190071	0.19105	0.117552	0.281386	0.250298	0.256736	0.192908	0.118168	0.159451	0.281093	0.179235	0.205188	0.301841	0.117326	0.315941
	89.3878	0.196538	0.0698587	0.248779	0.150407	0.0764818	0.116134	0.130147	0.209187	0.231975	0.214077	0.00294555	0.188126	0.26992	0.178929	0.15258	0.132921	0.149009	0.225124	0.060285	0.103256	0.157441	0.149461	0.132655	0.101039	0.211021	0.0586269	0.154745	0.197473	0.208291	0.248974	0.278782	0.0897274	0.115333	0.191073	0.188694	0.117699	0.277841	0.245837	0.254643	0.190312	0.114057	0.157221	0.279024	0.17952	0.205316	0.301022	0.116551	0.314424
	89.7959	0.198765	0.0707142	0.252282	0.150371	0.0752167	0.116348	0.126308	0.20547	0.236844	0.217207	0.0045865	0.187454	0.270112	0.179758	0.149622	0.129469	0.147807	0.227735	0.0580042	0.103466	0.157498	0.147101	0.1342	0.103041	0.207876	0.0651771	0.153775	0.19651	0.20731	0.249192	0.279169	0.0922887	0.114085	0.191934	0.186478	0.117847	0.274181	0.241178	0.252536	0.187779	0.109804	0.155026	0.276768	0.179822	0.205556	0.300161	0.115735	0.312796
	90.2041	0.20108	0.071319	0.255695	0.150465	0.0744613	0.11646	0.122522	0.201835	0.241521	0.220067	0.00637311	0.186765	0.270183	0.18053	0.146612	0.125983	0.146574	0.230767	0.0557324	0.103629	0.15771	0.144928	0.135654	0.104981	0.204805	0.0715955	0.152719	0.195461	0.206253	0.249175	0.279423	0.0949075	0.112821	0.192659	0.184432	0.118001	0.270407	0.236334	0.250415	0.185312	0.105424	0.15285	0.27433	0.180148	0.205888	0.299246	0.114897	0.311047
	90.6123	0.203431	0.0716838	0.258999	0.150684	0.0741882	0.116461	0.118793	0.198286	0.245991	0.222653	0.00819654	0.186058	0.270111	0.181252	0.143565	0.122469	0.14531	0.234129	0.053467	0.103737	0.15804	0.142962	0.137017	0.10685	0.201806	0.0777935	0.151565	0.194306	0.205124	0.248917	0.279527	0.0975001	0.111543	0.193251	0.182534	0.118161	0.266525	0.231336	0.248275	0.182916	0.100936	0.150703	0.271709	0.180506	0.206299	0.298271	0.114027	0.309172
	91.0204	0.205787	0.0718039	0.26218	0.151028	0.0743701	0.11635	0.115138	0.194826	0.250246	0.224981	0.0100156	0.18533	0.269898	0.181933	0.140492	0.118937	0.144015	0.237705	0.0512027	0.103786	0.158448	0.141223	0.138286	0.10866	0.198879	0.0837153	0.150302	0.193031	0.203933	0.248416	0.279474	0.100001	0.110246	0.193717	0.180812	0.118339	0.26255	0.22622	0.246122	0.180602	0.0963609	0.148577	0.268915	0.180908	0.206771	0.297231	0.113152	0.307168
	91.4286	0.208093	0.0716971	0.265215	0.151492	0.0749559	0.116121	0.111561	0.191458	0.25427	0.22703	0.0118152	0.18458	0.269521	0.182576	0.137402	0.115388	0.142692	0.241396	0.0489383	0.103764	0.158892	0.13973	0.139457	0.1104	0.19602	0.0893147	0.148926	0.191623	0.202681	0.24767	0.279252	0.102341	0.108929	0.194055	0.179257	0.11854	0.258491	0.221011	0.24395	0.178369	0.0917208	0.14647	0.265947	0.181367	0.207285	0.296118	0.112269	0.305031
	91.8367	0.210314	0.0713733	0.268084	0.152071	0.0758986	0.115774	0.108069	0.188184	0.258059	0.228827	0.0135858	0.183807	0.268989	0.183172	0.134313	0.111835	0.141338	0.245102	0.0466669	0.103681	0.15934	0.138498	0.140536	0.112083	0.193225	0.0945666	0.147436	0.190076	0.201384	0.246682	0.278864	0.104479	0.10759	0.194269	0.177877	0.118773	0.254364	0.215765	0.241766	0.176229	0.0870416	0.144387	0.262817	0.181896	0.207823	0.294933	0.1114	0.302767
	92.2449	0.212406	0.0708514	0.270761	0.152761	0.0771408	0.115308	0.10467	0.185004	0.261599	0.230355	0.0153206	0.183009	0.268292	0.183708	0.131226	0.108281	0.139955	0.248723	0.0443876	0.103529	0.159746	0.137544	0.141514	0.113704	0.190489	0.0994494	0.14583	0.188385	0.200039	0.245456	0.278309	0.106363	0.106223	0.194355	0.176688	0.119048	0.250179	0.210508	0.239567	0.174179	0.082345	0.142318	0.25953	0.182504	0.208363	0.293674	0.110555	0.300373
	92.6531	0.214325	0.0701579	0.273211	0.153548	0.0786255	0.114722	0.101361	0.181919	0.264884	0.23163	0.0170196	0.182182	0.267428	0.184159	0.128155	0.104736	0.13854	0.25218	0.0420956	0.103314	0.160082	0.136872	0.142401	0.115266	0.187806	0.10395	0.144116	0.186548	0.198659	0.243998	0.27759	0.107963	0.104831	0.194311	0.175674	0.119374	0.245945	0.2053	0.237353	0.172228	0.0776573	0.140276	0.256091	0.183201	0.208889	0.292345	0.10974	0.297857
	93.0612	0.216046	0.0693098	0.275405	0.154424	0.0803032	0.114021	0.09815	0.178928	0.267907	0.232656	0.0186771	0.181325	0.266402	0.184499	0.125098	0.101208	0.137094	0.25538	0.0397899	0.103035	0.160305	0.136492	0.143192	0.116779	0.185169	0.108062	0.142292	0.184568	0.197247	0.242311	0.276716	0.109247	0.103408	0.194138	0.174867	0.11976	0.241666	0.20018	0.235127	0.170375	0.0730007	0.138252	0.252513	0.183989	0.209378	0.290946	0.108981	0.295217
	93.4694	0.217526	0.068342	0.277305	0.155371	0.0821177	0.113203	0.0950346	0.176027	0.270657	0.233432	0.0202936	0.180435	0.2652	0.184703	0.122058	0.0977001	0.135613	0.258261	0.0374714	0.102688	0.160386	0.136401	0.14389	0.118235	0.182569	0.111774	0.140363	0.182449	0.195804	0.240403	0.275687	0.110187	0.101956	0.193837	0.174243	0.120218	0.237345	0.195197	0.232884	0.168623	0.0683987	0.136255	0.2488	0.184869	0.209813	0.289479	0.108275	0.292456
	93.8776	0.218754	0.0672713	0.278884	0.156377	0.0840313	0.112281	0.0920218	0.173213	0.273134	0.233989	0.0218638	0.17951	0.263834	0.184752	0.119034	0.0942255	0.134097	0.260748	0.0351405	0.102282	0.160295	0.136598	0.144498	0.119648	0.179999	0.115086	0.138326	0.180198	0.194339	0.238279	0.274514	0.110772	0.100473	0.193417	0.173826	0.120763	0.232986	0.19041	0.230632	0.166975	0.0638757	0.134282	0.244966	0.185839	0.210173	0.287948	0.107652	0.289575
	94.2857	0.219701	0.0661301	0.280115	0.157427	0.0859981	0.111257	0.0891171	0.17048	0.275326	0.234322	0.0233833	0.17855	0.262288	0.184641	0.116016	0.0907833	0.132548	0.262786	0.0328053	0.101807	0.159998	0.137074	0.145014	0.12101	0.177451	0.117988	0.136177	0.177826	0.192848	0.235944	0.273197	0.110978	0.0989568	0.192886	0.173612	0.12141	0.228588	0.185854	0.228365	0.165427	0.0594538	0.132332	0.241018	0.186893	0.210442	0.286349	0.107114	0.286571
	94.6939	0.22036	0.0649406	0.280985	0.158503	0.0879887	0.110145	0.0863243	0.167821	0.277235	0.234471	0.0248489	0.177553	0.260569	0.184371	0.113007	0.0873858	0.130963	0.264321	0.030471	0.101276	0.15948	0.137818	0.145449	0.122331	0.174918	0.12048	0.133912	0.175344	0.191341	0.233403	0.271745	0.110806	0.0974087	0.192264	0.173597	0.12218	0.224159	0.1816	0.226091	0.163984	0.0551614	0.130415	0.236969	0.188025	0.210605	0.284684	0.106681	0.283446
	95.102	0.220722	0.0637271	0.281487	0.159597	0.0899736	0.108955	0.0836566	0.165227	0.278855	0.234448	0.0262525	0.17652	0.258676	0.18396	0.109995	0.0840348	0.12935	0.265305	0.0281518	0.100689	0.158713	0.138817	0.145798	0.123611	0.172396	0.122561	0.131523	0.172767	0.189816	0.230665	0.270161	0.110244	0.0958235	0.191567	0.173801	0.123093	0.219707	0.177679	0.22381	0.16264	0.0510237	0.128522	0.232831	0.189227	0.210643	0.282949	0.106371	0.280197
	95.5102	0.220775	0.062521	0.281622	0.16069	0.0919275	0.107701	0.0811155	0.162689	0.280186	0.234279	0.0275931	0.17545	0.256606	0.183427	0.106983	0.0807367	0.127708	0.265707	0.0258619	0.100052	0.157691	0.140052	0.146074	0.124849	0.169878	0.124231	0.129008	0.170111	0.188279	0.227737	0.268451	0.109299	0.094202	0.190814	0.174201	0.124171	0.215244	0.174154	0.221527	0.161395	0.0470733	0.126667	0.228612	0.190494	0.210548	0.281142	0.106189	0.276828
	95.9184	0.220524	0.0613417	0.281403	0.161779	0.093837	0.106397	0.078713	0.160198	0.281232	0.234	0.0288649	0.174345	0.254377	0.182798	0.103964	0.0775005	0.126045	0.265485	0.0236223	0.0993814	0.1564	0.141506	0.146278	0.126053	0.167364	0.125502	0.126363	0.167394	0.186735	0.224628	0.266629	0.107981	0.092538	0.190026	0.174824	0.125434	0.210787	0.171066	0.219251	0.16025	0.0433417	0.124846	0.22433	0.19182	0.210305	0.279261	0.106164	0.273341
	96.3265	0.21995	0.0602279	0.280841	0.162851	0.0956809	0.105052	0.0764498	0.157743	0.28199	0.233618	0.0300674	0.173206	0.251985	0.182093	0.100937	0.074327	0.124367	0.264625	0.0214616	0.0986772	0.154839	0.143153	0.146417	0.127215	0.16485	0.126381	0.123594	0.164633	0.185185	0.22135	0.264699	0.106293	0.0908311	0.189217	0.175649	0.126898	0.206354	0.168454	0.216984	0.159197	0.0398635	0.123072	0.219992	0.193202	0.209907	0.277303	0.106294	0.269742
	96.7347	0.219064	0.0592009	0.279953	0.163898	0.0974559	0.103684	0.0743283	0.15532	0.28247	0.233179	0.0312008	0.172032	0.249456	0.181327	0.0979044	0.07123	0.122676	0.263103	0.0194143	0.0979611	0.153011	0.144971	0.146498	0.128346	0.162334	0.12689	0.120708	0.161847	0.183636	0.217916	0.262683	0.10426	0.0890777	0.188405	0.176686	0.128578	0.201963	0.166365	0.214741	0.158238	0.0366752	0.121354	0.215616	0.194637	0.209346	0.275271	0.106603	0.266041
	97.1429	0.217848	0.0582983	0.278749	0.164913	0.0991488	0.102297	0.0723501	0.152917	0.282667	0.23268	0.0322639	0.170824	0.246796	0.180504	0.0948597	0.0682099	0.12098	0.260912	0.0175326	0.0972335	0.150914	0.146933	0.14652	0.129438	0.159816	0.127047	0.117716	0.159054	0.182086	0.21434	0.26059	0.101892	0.087276	0.187597	0.177933	0.13048	0.197629	0.164811	0.212522	0.157364	0.0338092	0.119699	0.211211	0.196119	0.208616	0.273166	0.107089	0.262246
	97.551	0.216305	0.0575467	0.277241	0.165885	0.100758	0.100903	0.0705074	0.150533	0.282591	0.232157	0.0332608	0.169581	0.244023	0.17962	0.0918077	0.0652788	0.11928	0.258051	0.0158792	0.0965059	0.14856	0.149008	0.146494	0.130493	0.157294	0.126877	0.114636	0.156272	0.180543	0.210637	0.25844	0.0992147	0.0854279	0.186805	0.179373	0.132605	0.193367	0.163829	0.210339	0.156575	0.0312989	0.118131	0.206791	0.197642	0.207717	0.270993	0.107759	0.258372
	97.9592	0.214437	0.0569728	0.275434	0.166806	0.102282	0.0995066	0.0688026	0.148161	0.282242	0.231618	0.0341888	0.168302	0.241159	0.178665	0.0887384	0.0624424	0.117584	0.254513	0.0145397	0.0957855	0.145949	0.151169	0.146412	0.131515	0.154768	0.126406	0.11148	0.153516	0.179001	0.206819	0.256249	0.096247	0.0835321	0.186032	0.181024	0.134948	0.189183	0.163407	0.208197	0.155863	0.0291661	0.116654	0.202373	0.199197	0.206643	0.268756	0.108619	0.254426
	98.3674	0.212237	0.0566038	0.27333	0.167661	0.103716	0.0981119	0.0672262	0.145798	0.281624	0.231074	0.0350504	0.166986	0.238206	0.177624	0.0856514	0.0597055	0.115892	0.250318	0.0136058	0.0950685	0.143095	0.153382	0.146282	0.132493	0.152238	0.125655	0.108266	0.150801	0.177461	0.202901	0.254029	0.0930101	0.0815951	0.185286	0.182849	0.137499	0.185082	0.163556	0.2061	0.155223	0.0274259	0.115295	0.197964	0.200772	0.205398	0.26646	0.109653	0.250422
	98.7755	0.209728	0.0564495	0.270938	0.168442	0.105068	0.0967262	0.0657794	0.143442	0.280743	0.230551	0.0358436	0.165633	0.235192	0.17649	0.0825393	0.05708	0.114208	0.245464	0.0131618	0.0943683	0.140002	0.155619	0.146101	0.133438	0.149703	0.124652	0.105002	0.148141	0.175923	0.198893	0.251797	0.0895354	0.0796187	0.184576	0.184866	0.140243	0.181067	0.16425	0.204059	0.154651	0.0260752	0.114066	0.193582	0.20235	0.203981	0.26411	0.110872	0.246371
	99.1837	0.206906	0.0565282	0.268263	0.169135	0.106333	0.0953482	0.0644598	0.14109	0.2796	0.230043	0.036566	0.16424	0.232113	0.175257	0.0793942	0.054565	0.112539	0.239977	0.0132482	0.0936759	0.136679	0.157848	0.145867	0.134332	0.147164	0.123413	0.101701	0.145545	0.174378	0.194806	0.249552	0.0858406	0.0776102	0.183909	0.187045	0.143161	0.177134	0.165462	0.20207	0.154136	0.0250938	0.112986	0.189236	0.203915	0.202398	0.261708	0.112247	0.242279
	99.5918	0.203802	0.0568326	0.26532	0.169728	0.107521	0.0939864	0.0632657	0.13874	0.278204	0.229582	0.037218	0.162807	0.22899	0.173933	0.076216	0.0521733	0.110884	0.23387	0.0138406	0.0930028	0.133144	0.160042	0.145584	0.135184	0.144623	0.121963	0.0983662	0.143023	0.172828	0.190648	0.247308	0.0819657	0.0755756	0.1833	0.189379	0.146234	0.173288	0.167162	0.200145	0.153676	0.0244442	0.112076	0.184942	0.205448	0.200652	0.259256	0.113783	0.238159
	100	0.200427	0.0573639	0.262131	0.170215	0.108631	0.0926386	0.0622031	0.136389	0.276557	0.229159	0.0377952	0.161334	0.225827	0.172538	0.072995	0.049905	0.109254	0.227164	0.0148626	0.0923497	0.129404	0.162173	0.145243	0.135984	0.142083	0.120321	0.095002	0.140582	0.171262	0.186428	0.245059	0.077936	0.0735197	0.182758	0.191864	0.14944	0.169527	0.169289	0.198281	0.153259	0.0240705	0.111346	0.18071	0.20693	0.198747	0.25675	0.115455	0.234016
	100.408	0.196804	0.0581041	0.258726	0.170584	0.109668	0.0913099	0.0612669	0.134037	0.27467	0.228795	0.0383008	0.15982	0.222631	0.171096	0.0697387	0.0477679	0.107651	0.219891	0.0162098	0.0917189	0.125486	0.164218	0.144855	0.136726	0.139548	0.118507	0.0916143	0.138227	0.169682	0.182154	0.242807	0.0737924	0.0714517	0.182301	0.194466	0.152759	0.165858	0.171811	0.196486	0.152881	0.0239122	0.110823	0.17655	0.208346	0.196696	0.25419	0.11725	0.229864
	100.816	0.192959	0.0590349	0.255145	0.170836	0.110639	0.0900004	0.0604634	0.13168	0.272549	0.22849	0.0387337	0.158267	0.219425	0.169641	0.066445	0.0457689	0.106085	0.21207	0.0177883	0.0911239	0.121405	0.166156	0.144411	0.137414	0.137024	0.116549	0.0882061	0.135959	0.168079	0.177833	0.240549	0.0695766	0.0693743	0.181939	0.197197	0.156169	0.16229	0.174655	0.194761	0.152532	0.0239016	0.11051	0.172477	0.209681	0.194503	0.251572	0.119161	0.225711
	101.225	0.1889	0.0601358	0.251428	0.170964	0.111543	0.0887079	0.059786	0.12932	0.270202	0.228236	0.0390983	0.156673	0.216207	0.168204	0.0631244	0.0439088	0.104561	0.203745	0.0195159	0.0905585	0.117189	0.167969	0.143917	0.138031	0.134515	0.114469	0.0847885	0.133778	0.166453	0.173475	0.23828	0.0653268	0.0672969	0.181681	0.200013	0.159646	0.158831	0.17778	0.193105	0.152204	0.0239799	0.110431	0.168496	0.210926	0.192181	0.24889	0.121157	0.221573
	101.633	0.184658	0.0613753	0.247623	0.170971	0.112392	0.0874339	0.0592321	0.126956	0.267644	0.228045	0.0393999	0.15504	0.213008	0.166813	0.0597875	0.0422008	0.103084	0.194942	0.021335	0.0900377	0.112868	0.16964	0.143372	0.138585	0.132029	0.112299	0.0813724	0.131681	0.164803	0.169089	0.236002	0.0610999	0.0652236	0.181536	0.202922	0.163171	0.155495	0.181123	0.191526	0.151893	0.0240929	0.110591	0.164622	0.212075	0.18974	0.246144	0.123241	0.217466
	102.041	0.180233	0.0627363	0.243767	0.170857	0.113181	0.0861685	0.0587962	0.124591	0.264877	0.227884	0.0396425	0.153366	0.209831	0.165485	0.056443	0.0406432	0.101663	0.185708	0.0231996	0.0895545	0.108464	0.171155	0.142773	0.13906	0.129572	0.110067	0.0779739	0.129663	0.16312	0.164686	0.233706	0.0569364	0.0631628	0.181501	0.205896	0.166716	0.152289	0.184631	0.190015	0.151586	0.0241984	0.111002	0.160857	0.213122	0.187192	0.243331	0.125377	0.213406
	102.449	0.175651	0.064186	0.239901	0.170621	0.113918	0.084911	0.058465	0.122228	0.261919	0.22776	0.0398355	0.151652	0.206698	0.16423	0.0531104	0.0392484	0.100297	0.176085	0.0250777	0.0891104	0.104014	0.1725	0.142126	0.139459	0.127149	0.107804	0.0746121	0.127717	0.161408	0.160275	0.231398	0.0529006	0.0611234	0.181574	0.208916	0.170256	0.149225	0.188263	0.18858	0.15128	0.0242652	0.111674	0.157213	0.214063	0.184551	0.240453	0.127563	0.209416
	102.857	0.170921	0.0657113	0.236053	0.170266	0.114604	0.0836489	0.058235	0.119872	0.258773	0.227636	0.0399822	0.149895	0.203625	0.163046	0.0497962	0.0380183	0.0989928	0.166115	0.0269459	0.0887049	0.0995382	0.173663	0.14142	0.139777	0.124764	0.105542	0.0713038	0.125831	0.159656	0.155866	0.229072	0.0490454	0.059113	0.181744	0.21198	0.173764	0.146303	0.191956	0.18721	0.150964	0.0242695	0.112602	0.153693	0.214892	0.181827	0.23751	0.129775	0.205511
	103.265	0.166055	0.0672894	0.232244	0.169787	0.115238	0.0823756	0.0580901	0.117528	0.255451	0.2275	0.0400915	0.148093	0.200616	0.161923	0.0465202	0.0369575	0.0977467	0.155856	0.0287833	0.0883234	0.0950699	0.174629	0.14066	0.140003	0.122422	0.103302	0.0680688	0.123995	0.157867	0.151467	0.226726	0.0454367	0.0571458	0.182	0.215046	0.177211	0.143524	0.195687	0.185904	0.150633	0.0241991	0.113796	0.150299	0.215605	0.179036	0.234506	0.131992	0.201713
	103.674	0.161084	0.0689082	0.228493	0.169185	0.115825	0.0810824	0.0580275	0.115204	0.251962	0.227333	0.0401678	0.146247	0.197691	0.160849	0.0432908	0.0360733	0.0965606	0.145348	0.0305775	0.087971	0.090631	0.175389	0.139837	0.140145	0.120126	0.101111	0.0649186	0.122195	0.156031	0.147085	0.224359	0.0421472	0.0552306	0.182327	0.218124	0.180569	0.140885	0.199398	0.184654	0.150278	0.0240444	0.115239	0.14704	0.21619	0.176187	0.231445	0.134206	0.198036
	104.082	0.156015	0.0705587	0.224805	0.168455	0.116357	0.0797583	0.0580385	0.112904	0.248312	0.227101	0.0402166	0.144352	0.194839	0.159811	0.0401229	0.035361	0.095431	0.134655	0.0323128	0.0876296	0.0862485	0.175931	0.138951	0.140186	0.117877	0.0989816	0.0618648	0.120416	0.154143	0.142724	0.221961	0.0392427	0.0533828	0.18271	0.22117	0.183809	0.138377	0.203063	0.183448	0.14989	0.0238051	0.116932	0.14391	0.216639	0.173295	0.228327	0.136382	0.194496
	104.49	0.150889	0.0722269	0.221193	0.167595	0.11684	0.0784008	0.058118	0.110634	0.244515	0.226803	0.0402454	0.142408	0.192077	0.158807	0.0370325	0.0348288	0.0943538	0.123824	0.0339811	0.0873015	0.081952	0.176247	0.138001	0.140134	0.115677	0.0969302	0.0589121	0.118645	0.152199	0.138387	0.219528	0.0368067	0.0516139	0.183139	0.224182	0.186908	0.135994	0.206643	0.18228	0.149464	0.0234839	0.118855	0.140915	0.216938	0.17037	0.225154	0.138521	0.191105
	104.898	0.14572	0.0739131	0.217661	0.166604	0.117265	0.0769993	0.0582677	0.108398	0.240573	0.226398	0.040258	0.140414	0.189392	0.157839	0.0340318	0.0344678	0.0933289	0.112917	0.0355716	0.0869798	0.0777639	0.176331	0.136979	0.139977	0.113529	0.0949624	0.0560612	0.116867	0.150188	0.134076	0.217044	0.0348942	0.0499359	0.183598	0.227139	0.189843	0.133728	0.2101	0.181132	0.14899	0.0230886	0.120988	0.138048	0.217078	0.167421	0.221924	0.140587	0.187872
	105.306	0.140544	0.0756016	0.21422	0.16548	0.117633	0.0755556	0.058479	0.106199	0.236502	0.225891	0.0402648	0.138371	0.186785	0.15692	0.0311471	0.0342794	0.0923483	0.102003	0.0370769	0.0866574	0.0737224	0.176179	0.135894	0.139716	0.111432	0.0930833	0.0533138	0.115068	0.148111	0.129792	0.214501	0.0335624	0.0483615	0.184085	0.230011	0.192597	0.131576	0.213416	0.179999	0.148465	0.0226358	0.123317	0.135308	0.217048	0.164462	0.218635	0.142576	0.184807
	105.714	0.135385	0.0772928	0.210881	0.16423	0.117938	0.0740642	0.0587565	0.104039	0.23231	0.225254	0.0402713	0.136277	0.184259	0.156071	0.0283954	0.034257	0.0914136	0.0911481	0.0384926	0.0863408	0.0698524	0.17579	0.134738	0.139352	0.109388	0.0912985	0.050667	0.113235	0.145957	0.125538	0.211884	0.0328219	0.0468971	0.184588	0.232805	0.195157	0.129535	0.216544	0.178863	0.147879	0.0221454	0.125805	0.132691	0.216842	0.161496	0.215281	0.144471	0.181914
	106.123	0.130259	0.0789739	0.207659	0.162853	0.118173	0.0725259	0.05909	0.10192	0.228006	0.224472	0.0402884	0.134134	0.181801	0.155317	0.0258103	0.0343912	0.0905174	0.0804524	0.0398121	0.0860145	0.0661943	0.175166	0.133521	0.138874	0.107398	0.0896061	0.0481252	0.111356	0.143726	0.121316	0.20918	0.0326558	0.0455532	0.185104	0.235473	0.197512	0.127609	0.219476	0.177716	0.147227	0.0216499	0.128438	0.130188	0.216459	0.158537	0.21186	0.146254	0.179201
	106.531	0.125197	0.0806392	0.204569	0.161361	0.118338	0.0709421	0.0594766	0.0998415	0.223606	0.22354	0.0403255	0.131943	0.179425	0.154685	0.0234187	0.0346799	0.0896584	0.0700206	0.0410364	0.0856859	0.06278	0.174312	0.132241	0.138295	0.105464	0.088013	0.0456921	0.109422	0.141414	0.11713	0.206384	0.0330092	0.0443313	0.185623	0.238032	0.199657	0.125803	0.222176	0.176546	0.146505	0.0211866	0.131174	0.127798	0.2159	0.155587	0.208367	0.147928	0.176672
	106.939	0.120197	0.0822846	0.201622	0.159759	0.118421	0.069309	0.0599079	0.097804	0.219115	0.222424	0.040391	0.129705	0.177119	0.154193	0.0212545	0.0351058	0.0888324	0.0600206	0.042162	0.0853405	0.0596429	0.17323	0.130901	0.1376	0.103583	0.0865169	0.0433791	0.107423	0.139018	0.112985	0.203483	0.0337942	0.0432365	0.186137	0.240441	0.201584	0.124121	0.224633	0.175339	0.145705	0.0208015	0.133995	0.125505	0.215169	0.152656	0.204799	0.149467	0.174332
	107.347	0.115287	0.0838997	0.198829	0.158055	0.118423	0.0676318	0.06037	0.09581	0.214551	0.22113	0.0404957	0.12742	0.174894	0.153854	0.0193515	0.0356674	0.088032	0.0506836	0.0431914	0.0849721	0.0568179	0.171928	0.129508	0.136801	0.101755	0.0851221	0.0412012	0.10535	0.136541	0.108889	0.200481	0.0349254	0.0422677	0.186634	0.242698	0.20329	0.122573	0.226832	0.174093	0.144826	0.0205443	0.136867	0.123307	0.214272	0.149747	0.201159	0.150881	0.172185
	107.755	0.110466	0.0854905	0.196186	0.156261	0.118333	0.0659045	0.0608586	0.0938584	0.209918	0.219619	0.040644	0.125091	0.172747	0.153669	0.017733	0.0363473	0.0872548	0.0423869	0.0441253	0.0845751	0.0543245	0.170412	0.128054	0.135895	0.0999779	0.083828	0.0391747	0.103198	0.133975	0.104847	0.197373	0.0362982	0.0414227	0.187095	0.244793	0.204769	0.121159	0.228753	0.172787	0.143861	0.0204602	0.139761	0.121189	0.213215	0.146862	0.197448	0.152149	0.17023
	108.163	0.105747	0.0870494	0.193688	0.154378	0.118146	0.0641316	0.0613561	0.0919518	0.20523	0.217895	0.0408439	0.122717	0.170673	0.153626	0.016423	0.0371376	0.0864883	0.0357332	0.0449641	0.0841287	0.0521893	0.168685	0.126552	0.134881	0.098247	0.0826309	0.0373217	0.10096	0.131326	0.100865	0.194166	0.0378385	0.0406993	0.187505	0.246694	0.206013	0.11988	0.230403	0.171421	0.142808	0.0205905	0.142658	0.119141	0.212002	0.144006	0.193672	0.153273	0.16847
	108.571	0.10115	0.088588	0.191315	0.152416	0.117859	0.0623109	0.0618608	0.09009	0.200493	0.21594	0.0410961	0.120298	0.168678	0.153704	0.0154178	0.0380275	0.0857284	0.0315684	0.0457115	0.0836354	0.0504149	0.166754	0.124992	0.133771	0.0965576	0.0815292	0.0356581	0.0986327	0.128585	0.0969486	0.190863	0.0394655	0.0400889	0.18784	0.248416	0.20702	0.11873	0.231757	0.169979	0.141664	0.020959	0.14552	0.117157	0.210633	0.141176	0.189836	0.154245	0.166898
	108.98	0.0966769	0.0901078	0.18904	0.150373	0.11746	0.0604443	0.0623624	0.0882727	0.195715	0.213743	0.041402	0.117836	0.16674	0.153876	0.0147071	0.0389996	0.0849622	0.0306727	0.0463651	0.083074	0.0490069	0.164624	0.123381	0.132554	0.094903	0.0805091	0.0342024	0.096213	0.125756	0.0931012	0.187466	0.0411244	0.0395875	0.188084	0.249915	0.207781	0.1177	0.232829	0.168454	0.140423	0.0215762	0.148336	0.115217	0.209109	0.138375	0.185948	0.155052	0.165509
	109.388	0.0923621	0.0916178	0.186833	0.148254	0.116951	0.058538	0.0628584	0.0864999	0.190907	0.211316	0.0417607	0.115332	0.164863	0.154118	0.0142476	0.0400489	0.0841813	0.0330324	0.0469287	0.082446	0.0479515	0.162302	0.121718	0.131249	0.0932773	0.0795628	0.0329664	0.0937005	0.122833	0.0893254	0.183984	0.0427683	0.0391829	0.188218	0.251204	0.208296	0.11678	0.233599	0.166837	0.139088	0.0224376	0.151068	0.11332	0.207424	0.135598	0.182014	0.155702	0.164289
	109.796	0.0882091	0.0931277	0.184655	0.146061	0.116321	0.0565931	0.0633505	0.0847668	0.186069	0.208642	0.042167	0.112786	0.163022	0.154405	0.0139877	0.0411535	0.0833776	0.0377927	0.0474001	0.0817449	0.0472271	0.159795	0.120003	0.129846	0.0916733	0.0786719	0.0319591	0.0910953	0.119813	0.0856221	0.180414	0.044354	0.0388669	0.188228	0.252258	0.208562	0.115953	0.234069	0.165114	0.13765	0.0235253	0.1537	0.111447	0.205577	0.132843	0.178036	0.156172	0.163223
	110.204	0.0842486	0.0946377	0.182477	0.143793	0.115569	0.0546232	0.0638324	0.0830712	0.181217	0.205751	0.0426191	0.110203	0.161209	0.154725	0.0138616	0.0423071	0.0825395	0.0439327	0.0477811	0.0809639	0.0468075	0.157112	0.118246	0.128357	0.090085	0.0778214	0.0311897	0.0884004	0.116698	0.081992	0.176764	0.0458626	0.0386268	0.188109	0.253064	0.208583	0.115209	0.234238	0.163286	0.136114	0.0248183	0.156206	0.109593	0.203563	0.130105	0.174022	0.156475	0.162296
	110.612	0.0804908	0.0961582	0.180266	0.141459	0.11469	0.0526323	0.0643116	0.0814055	0.17635	0.202635	0.0431086	0.107584	0.159413	0.155074	0.0138012	0.0434922	0.081665	0.0507425	0.0480735	0.0801124	0.0466499	0.154266	0.116442	0.126787	0.0885067	0.0769976	0.0306632	0.08562	0.113482	0.0784371	0.173029	0.047262	0.0384487	0.187853	0.25363	0.208364	0.114537	0.234089	0.161336	0.134475	0.0262891	0.158557	0.107747	0.201381	0.127379	0.169969	0.156598	0.161482
	111.02	0.0769452	0.0976802	0.178004	0.139057	0.113679	0.0506348	0.0647792	0.0797634	0.171481	0.199318	0.0436322	0.104933	0.157612	0.155457	0.0137495	0.0446951	0.0807441	0.0577777	0.0482771	0.0791766	0.0467219	0.151267	0.114606	0.125133	0.0869336	0.0761842	0.0303913	0.0827596	0.110172	0.0749593	0.169213	0.0485479	0.0383203	0.187466	0.253917	0.207914	0.11393	0.233637	0.159268	0.132735	0.0279115	0.16074	0.105897	0.199036	0.124662	0.16588	0.156544	0.160766
	111.429	0.0736271	0.0992058	0.175677	0.136602	0.112539	0.0486397	0.0652367	0.0781376	0.166617	0.195812	0.044182	0.102254	0.155814	0.155888	0.013649	0.0459077	0.0797774	0.0647874	0.0483986	0.0781686	0.0469752	0.148133	0.112735	0.123412	0.0853619	0.0753776	0.030383	0.0798273	0.106764	0.0715635	0.165322	0.0497055	0.0382232	0.186949	0.253953	0.207244	0.113386	0.232861	0.157074	0.130893	0.0296588	0.16272	0.104041	0.196533	0.121945	0.161756	0.156321	0.160122
	111.837	0.0705226	0.100723	0.173281	0.134099	0.111262	0.0466552	0.0656764	0.0765193	0.161762	0.19212	0.0447518	0.0995525	0.153997	0.156381	0.0134659	0.0471099	0.0787605	0.0716109	0.0484384	0.0770773	0.0473761	0.144874	0.11084	0.121616	0.0837879	0.0745689	0.03065	0.0768303	0.103264	0.0682549	0.161355	0.0507319	0.0381451	0.186308	0.253701	0.206365	0.112903	0.231777	0.154756	0.128951	0.0315013	0.164492	0.102163	0.193884	0.119228	0.157598	0.155919	0.159533
	112.245	0.0676448	0.102223	0.170818	0.131556	0.109854	0.0446938	0.0660883	0.0749035	0.156931	0.188276	0.0453357	0.0968314	0.152172	0.156948	0.0131648	0.0482997	0.0776917	0.0781448	0.0484044	0.0759024	0.0478849	0.141508	0.108925	0.119765	0.0822092	0.0737622	0.0312017	0.0737784	0.0996768	0.0650411	0.15733	0.0516317	0.0380673	0.185547	0.253175	0.205288	0.112483	0.230379	0.152317	0.126911	0.0334125	0.166028	0.100266	0.191098	0.116501	0.153414	0.155363	0.158981
	112.653	0.064974	0.103697	0.168289	0.128987	0.10831	0.0427567	0.0664695	0.0732821	0.152122	0.184266	0.0459234	0.094095	0.150331	0.157591	0.0127317	0.0494581	0.0765724	0.0843264	0.0483003	0.0746448	0.0484685	0.138047	0.106989	0.117855	0.0806222	0.0729594	0.0320367	0.0706804	0.0960051	0.0619296	0.153251	0.0523971	0.0379764	0.184663	0.25237	0.20402	0.112125	0.228673	0.149753	0.124773	0.0353612	0.167318	0.0983376	0.188189	0.113763	0.149207	0.154638	0.158447
	113.061	0.0625137	0.10513	0.165704	0.126393	0.106633	0.0408556	0.0668038	0.0716527	0.14735	0.18013	0.0465093	0.0913469	0.148472	0.1583	0.0121551	0.0505797	0.0753965	0.0900997	0.0481304	0.0732908	0.0491007	0.134502	0.105043	0.115894	0.0790241	0.0721633	0.0331489	0.0675459	0.0922594	0.058927	0.14914	0.0530422	0.0378586	0.183659	0.251266	0.202568	0.111828	0.226676	0.147078	0.122543	0.0373195	0.168353	0.0963749	0.185166	0.111009	0.144989	0.153768	0.15792
	113.469	0.0602602	0.106522	0.163059	0.123786	0.104828	0.0389901	0.067093	0.0700103	0.142613	0.175866	0.0470807	0.0885905	0.146599	0.159051	0.0114314	0.0516549	0.0741673	0.0954416	0.0479013	0.071853	0.0497486	0.130887	0.103075	0.113895	0.0774115	0.0713806	0.0345148	0.0643851	0.0884385	0.0560397	0.145009	0.0535587	0.0377006	0.182524	0.249892	0.200938	0.111581	0.224383	0.144286	0.120221	0.0392603	0.169116	0.0943765	0.182037	0.108233	0.140772	0.152751	0.157382
	113.878	0.0582058	0.107858	0.160352	0.121162	0.10289	0.0371679	0.0673266	0.0683526	0.13792	0.171499	0.047629	0.0858289	0.144693	0.159809	0.0105674	0.0526689	0.0728774	0.100321	0.0476128	0.0703181	0.0503949	0.127209	0.101098	0.111851	0.0757807	0.0706063	0.036105	0.0612074	0.0845544	0.0532702	0.140875	0.0539544	0.0374956	0.181256	0.248208	0.19913	0.111374	0.221822	0.141389	0.11781	0.0411583	0.169613	0.0923333	0.178807	0.105436	0.136566	0.15159	0.156823
	114.286	0.0563681	0.109142	0.157573	0.118527	0.100833	0.0353939	0.0675066	0.0666781	0.133273	0.167059	0.0481425	0.0830653	0.142761	0.160529	0.00956435	0.0536206	0.0715274	0.10473	0.0472708	0.0687004	0.0510101	0.123481	0.0991029	0.109785	0.0741288	0.0698419	0.0378821	0.0580239	0.080607	0.0506204	0.136757	0.0542287	0.0372334	0.179848	0.24625	0.197148	0.111189	0.218986	0.138388	0.115317	0.0429952	0.169824	0.0902514	0.175475	0.102609	0.132386	0.150304	0.156224
	114.694	0.0547338	0.110365	0.154706	0.115877	0.0986511	0.0336714	0.0676357	0.0649824	0.128673	0.162553	0.0486097	0.0803031	0.140778	0.161168	0.00843984	0.0544906	0.070114	0.108659	0.0468736	0.0670036	0.0515783	0.11971	0.0970942	0.107684	0.0724525	0.0690772	0.0398049	0.0548447	0.0766041	0.0480891	0.132658	0.0543756	0.0369126	0.178298	0.243992	0.194994	0.111005	0.215896	0.135287	0.112741	0.0447534	0.169758	0.0881219	0.172042	0.0997561	0.12824	0.148879	0.155573
	115.102	0.0533233	0.111525	0.15174	0.11321	0.096356	0.0320124	0.0677112	0.0632651	0.12413	0.158039	0.0490222	0.0775461	0.138741	0.161687	0.00720911	0.055278	0.0686342	0.112101	0.0464239	0.0652336	0.0520798	0.115909	0.0950768	0.105567	0.0707506	0.0683048	0.0418394	0.0516813	0.0725521	0.0456744	0.128598	0.0544047	0.0365282	0.176607	0.241442	0.192673	0.110803	0.212557	0.132095	0.110091	0.0464234	0.169402	0.08595	0.168507	0.0968709	0.124138	0.147344	0.154852
	115.51	0.0521256	0.11262	0.148658	0.110527	0.0939516	0.030418	0.0677444	0.06152	0.119636	0.153516	0.0493686	0.0747984	0.136638	0.162056	0.00591433	0.055969	0.0670923	0.115064	0.0459229	0.0634132	0.0524986	0.112089	0.0930457	0.103432	0.0690222	0.0675185	0.0439508	0.0485454	0.0684538	0.0433744	0.124575	0.0543039	0.0360796	0.174782	0.238617	0.19019	0.110563	0.208969	0.128809	0.107368	0.0479961	0.168755	0.083735	0.164872	0.0939549	0.120084	0.145686	0.154045
	115.918	0.0511387	0.113635	0.145463	0.107824	0.0914411	0.0289017	0.0677278	0.0597451	0.115204	0.149039	0.0496443	0.0720645	0.134454	0.162265	0.00465153	0.0565551	0.0654852	0.117542	0.0453697	0.0615402	0.0528291	0.108264	0.0910166	0.101281	0.0672686	0.0667087	0.0461172	0.0454482	0.0643232	0.041187	0.120597	0.0540851	0.0355669	0.172838	0.235488	0.187554	0.110273	0.205155	0.125446	0.10458	0.0494646	0.167818	0.0814755	0.161142	0.0910084	0.116084	0.143928	0.153138
	116.326	0.0503571	0.114565	0.142152	0.105109	0.0888396	0.027465	0.067668	0.0579356	0.110832	0.14462	0.0498418	0.0693495	0.132196	0.162313	0.00365706	0.0570346	0.0638226	0.119548	0.0447701	0.0596425	0.0530593	0.104447	0.0889814	0.0991293	0.0654922	0.0658796	0.0483196	0.0424019	0.0601628	0.0391128	0.116669	0.0537445	0.034987	0.170787	0.232103	0.184775	0.109924	0.2011	0.122004	0.101731	0.050824	0.166579	0.0791806	0.157326	0.088031	0.11214	0.142075	0.152116
	116.735	0.049749	0.115387	0.138745	0.10238	0.0861443	0.0261141	0.0675574	0.0560878	0.106528	0.140285	0.0499583	0.066658	0.129851	0.162214	0.00342921	0.0573921	0.0621062	0.121083	0.0441227	0.0577197	0.0531955	0.100649	0.0869537	0.0969624	0.0636961	0.0650287	0.050544	0.0394167	0.05599	0.0371522	0.112788	0.0532855	0.0343423	0.168653	0.228427	0.18186	0.109515	0.196837	0.118499	0.0988262	0.0520648	0.165054	0.0768444	0.153437	0.0850286	0.108254	0.140133	0.150971
	117.143	0.0493115	0.116088	0.135265	0.0996464	0.083374	0.0248524	0.0673892	0.0542018	0.102296	0.136068	0.0499914	0.0639947	0.127435	0.161985	0.00427226	0.057634	0.0603448	0.122157	0.0434346	0.0557885	0.0532352	0.0968854	0.0849312	0.0948029	0.061885	0.0641658	0.0527809	0.0365036	0.0518122	0.0353076	0.108971	0.0527186	0.0336284	0.166447	0.224499	0.178818	0.109047	0.19236	0.114938	0.0958748	0.0531804	0.163231	0.0744787	0.14949	0.0820011	0.104432	0.13813	0.149694
	117.551	0.0490026	0.116647	0.131744	0.0969136	0.08053	0.0236747	0.0671609	0.0522749	0.0981365	0.131956	0.0499373	0.0613636	0.124947	0.161642	0.00584159	0.0577476	0.0585469	0.122782	0.0427073	0.0538614	0.0531871	0.0931644	0.0829136	0.0926378	0.0600626	0.0632972	0.055014	0.0336715	0.0476438	0.033581	0.105214	0.0520356	0.0328469	0.164186	0.220316	0.175655	0.108522	0.187692	0.111331	0.0928794	0.0541593	0.161125	0.0720815	0.145502	0.078957	0.100677	0.136056	0.148282
	117.959	0.0488151	0.117046	0.12822	0.0941844	0.0776236	0.0225844	0.0668561	0.050312	0.0940627	0.127996	0.0497965	0.0587684	0.122394	0.161192	0.00777268	0.0577358	0.0567157	0.122966	0.0419445	0.051939	0.0530578	0.0894947	0.0809073	0.0904787	0.0582334	0.062426	0.0572303	0.0309284	0.0434995	0.0319725	0.101536	0.0512518	0.0319968	0.161879	0.215879	0.172373	0.107947	0.182851	0.107698	0.0898503	0.0549922	0.158743	0.0696585	0.141488	0.0758991	0.0970003	0.133948	0.146736
	118.367	0.0487258	0.117277	0.12472	0.0914686	0.0746679	0.0215696	0.0664789	0.0483151	0.0900682	0.124165	0.0495638	0.056212	0.119789	0.160625	0.00988146	0.0575979	0.0548628	0.122731	0.0411511	0.0500482	0.0528498	0.085884	0.0788984	0.0883281	0.0564003	0.0615582	0.0594059	0.0282821	0.0393871	0.0304811	0.0979413	0.0503565	0.0310787	0.159528	0.211229	0.168973	0.107317	0.177842	0.104038	0.0867915	0.0556708	0.156091	0.0672174	0.137459	0.0728349	0.093409	0.131795	0.145054
	118.775	0.0487182	0.117321	0.121279	0.0887601	0.0716636	0.0206308	0.0660167	0.0462907	0.0861659	0.120495	0.0492391	0.0536969	0.117123	0.159915	0.0120817	0.0573265	0.0529866	0.122087	0.040325	0.0481851	0.0525728	0.0823352	0.0768976	0.086178	0.0545661	0.0606837	0.0615166	0.0257382	0.0353249	0.0291013	0.0944426	0.049355	0.030098	0.157135	0.206334	0.165454	0.106627	0.172706	0.100374	0.0837102	0.0561877	0.153194	0.0647555	0.133425	0.0697717	0.089915	0.129619	0.143243
	119.184	0.0487983	0.117184	0.117909	0.0860656	0.068632	0.0197597	0.0654755	0.0442457	0.0823513	0.116981	0.0488184	0.0512253	0.114409	0.159024	0.0143234	0.0569319	0.0510955	0.121062	0.0394717	0.0463803	0.0522214	0.0788549	0.0748908	0.0840467	0.0527333	0.0597976	0.0635356	0.0233036	0.0313169	0.0278265	0.0910521	0.0482466	0.029057	0.15469	0.201254	0.161814	0.105864	0.167435	0.0967061	0.0806144	0.0565424	0.150051	0.0622874	0.129387	0.0667139	0.0865282	0.127427	0.141301
	119.592	0.0489414	0.11686	0.11462	0.0833756	0.0655715	0.0189523	0.0648576	0.0421847	0.0786288	0.113624	0.0482997	0.0487991	0.11163	0.1579	0.0165684	0.0564019	0.0491892	0.119673	0.0385865	0.0446418	0.051802	0.0754446	0.0728837	0.0819143	0.0509034	0.0588831	0.0654336	0.0209831	0.0273792	0.0266467	0.0877671	0.0470221	0.0279667	0.152193	0.195962	0.158051	0.105011	0.162066	0.0930479	0.0775074	0.0567342	0.146692	0.0598093	0.12535	0.0636722	0.0832554	0.125215	0.139232
	120	0.0491642	0.116354	0.111411	0.0806878	0.0625	0.01821	0.0641641	0.0401164	0.0750022	0.11045	0.0476834	0.0464205	0.10879	0.1565	0.0187992	0.0557469	0.04727	0.117944	0.0376713	0.0429896	0.0513096	0.0721103	0.0708761	0.0797996	0.0490794	0.0579248	0.0671908	0.0187824	0.0235183	0.0255514	0.0845999	0.045694	0.0268335	0.149637	0.190491	0.154167	0.104053	0.1566	0.0894062	0.0743999	0.0567694	0.143118	0.0573329	0.121312	0.06065	0.0801051	0.123005	0.137035
	120.408	0.0494411	0.115671	0.108269	0.0779986	0.0594251	0.0175259	0.0634098	0.0380425	0.0714652	0.107428	0.046968	0.0440919	0.105879	0.154784	0.0209942	0.0549628	0.045344	0.115903	0.0367247	0.0414493	0.0507456	0.0688562	0.0688636	0.0776901	0.0472637	0.0569132	0.0687855	0.0167068	0.0197446	0.0245316	0.0815377	0.0442501	0.0256693	0.147024	0.184861	0.150164	0.102972	0.151051	0.0857808	0.0712944	0.0566542	0.139349	0.0548627	0.117275	0.0576584	0.0770759	0.120779	0.134707
	120.816	0.0497677	0.11481	0.105188	0.0752987	0.0563523	0.0169083	0.0625886	0.0359694	0.0680304	0.104595	0.0461588	0.0418157	0.102889	0.152737	0.023145	0.0540499	0.0434097	0.113566	0.035744	0.0400237	0.0501146	0.0656872	0.066862	0.0755876	0.0454606	0.0558337	0.0702098	0.0147603	0.0160718	0.0235783	0.0785822	0.0427068	0.0244846	0.144358	0.179056	0.14605	0.101762	0.14544	0.0821892	0.0682004	0.0563952	0.135401	0.0524003	0.113245	0.0547029	0.0741701	0.118563	0.13225
	121.225	0.0501261	0.113774	0.102149	0.0725948	0.0533013	0.0163501	0.0617134	0.0338988	0.0646873	0.10191	0.0452579	0.0395949	0.0998339	0.150361	0.0252394	0.0530194	0.0414798	0.110966	0.0347337	0.0387453	0.0494174	0.0626108	0.0648598	0.0734995	0.0436749	0.0546901	0.0714572	0.0129478	0.0125056	0.0226869	0.0757235	0.041065	0.0232877	0.141648	0.173139	0.141835	0.100418	0.139755	0.0786222	0.0651235	0.056	0.131273	0.0499603	0.109229	0.0517922	0.0713816	0.116343	0.12966
	121.633	0.0504779	0.112551	0.0991541	0.0698794	0.050269	0.0158556	0.0607754	0.0318337	0.0614492	0.0993864	0.0442727	0.0374321	0.0967026	0.147681	0.0272631	0.0518633	0.0395555	0.108117	0.03369	0.0376043	0.0486696	0.0596299	0.0628748	0.0714077	0.0419119	0.05348	0.0725273	0.0112718	0.00906546	0.0218536	0.0729505	0.0393331	0.0220908	0.138909	0.167075	0.137526	0.0989491	0.134037	0.0751009	0.0620694	0.0554706	0.127	0.0475374	0.105242	0.0489362	0.0687059	0.114131	0.126944
	122.041	0.050816	0.111141	0.0961978	0.0671647	0.0472771	0.0154203	0.0597726	0.0297799	0.0583121	0.0969989	0.0432098	0.0353299	0.0935222	0.14474	0.0292046	0.0506011	0.0376494	0.105044	0.0326205	0.0366203	0.0478765	0.0567512	0.0608991	0.0693337	0.0401779	0.0522124	0.0734242	0.00973495	0.00575717	0.0210775	0.0702657	0.0375308	0.0208983	0.136151	0.160927	0.133137	0.0973677	0.128272	0.0716211	0.0590474	0.0548105	0.122573	0.0451471	0.101296	0.0461408	0.0661385	0.111936	0.124102
	122.449	0.0510877	0.109528	0.0932928	0.0644534	0.0443265	0.0150358	0.0587016	0.0277397	0.0552808	0.0947135	0.0420748	0.0332903	0.0902958	0.141582	0.0310388	0.0492289	0.0357695	0.10177	0.0315251	0.0357827	0.0470563	0.0539751	0.0589348	0.0672551	0.0384776	0.0508962	0.0741449	0.00833847	0.00259911	0.0203584	0.0676539	0.0356559	0.0197206	0.133388	0.154688	0.128676	0.0956884	0.122495	0.0681954	0.0560601	0.0540182	0.118029	0.0427885	0.0974129	0.0434188	0.0636722	0.109743	0.121146
	122.857	0.0512918	0.107705	0.0904536	0.0617536	0.0414277	0.0147002	0.0575466	0.0257238	0.0523632	0.0925329	0.0408761	0.0313149	0.0870424	0.138255	0.0327491	0.0477598	0.0339218	0.0983124	0.0304086	0.0350833	0.046219	0.0513029	0.0569856	0.0651872	0.0368162	0.0495328	0.0746912	0.00708277	0.00042039	0.0196946	0.0651271	0.0337368	0.0185625	0.130624	0.148374	0.12415	0.0939291	0.11672	0.0648346	0.0531175	0.0530936	0.113377	0.0404664	0.0936053	0.0407747	0.0613077	0.10758	0.118085
	123.265	0.0513976	0.105671	0.0876959	0.0590778	0.0385948	0.0143954	0.056314	0.0237379	0.049552	0.0903867	0.0396161	0.0294045	0.0837823	0.13478	0.0343086	0.046205	0.0321188	0.0947006	0.0292764	0.034519	0.045374	0.0487332	0.0550347	0.0631242	0.0351963	0.0481305	0.0750523	0.00596937	0.00323922	0.0190849	0.0626789	0.0317726	0.0174318	0.127858	0.142037	0.119566	0.0920967	0.110955	0.0615358	0.0502224	0.0520377	0.108638	0.0381916	0.0898882	0.0382205	0.05904	0.105421	0.11493
	123.674	0.0513987	0.103423	0.0850421	0.0564236	0.0358237	0.0141209	0.0549893	0.0217939	0.0468629	0.0882919	0.0383016	0.0275593	0.0805127	0.131166	0.0356977	0.0445633	0.030358	0.0909498	0.0281272	0.0340556	0.0445314	0.046261	0.0530952	0.0610593	0.0336199	0.0466793	0.0752194	0.00499893	0.00589104	0.0185238	0.0603173	0.0297845	0.0163376	0.125084	0.135642	0.114926	0.0901961	0.105245	0.0583219	0.0473817	0.0508528	0.103845	0.0359575	0.0862686	0.0357618	0.0568727	0.103287	0.111699
	124.082	0.0513061	0.100975	0.0824951	0.0538045	0.0331372	0.0138623	0.0535849	0.0199027	0.0442821	0.0861833	0.0369347	0.0257793	0.0772572	0.127391	0.0369017	0.042858	0.0286494	0.0870928	0.0269686	0.0336956	0.0436874	0.0438846	0.0511466	0.0590099	0.0320873	0.0451773	0.0751791	0.00417529	0.00836404	0.0180057	0.0580494	0.027788	0.0152867	0.122282	0.129268	0.110236	0.0882204	0.0995755	0.0551793	0.0446009	0.049548	0.0990005	0.0337807	0.0827487	0.0334057	0.0548054	0.101161	0.108397
	124.49	0.0511013	0.0983361	0.0800632	0.0512106	0.0305276	0.0136173	0.0521035	0.0180725	0.0418214	0.0840633	0.0355197	0.024064	0.0739987	0.123418	0.0379065	0.0410821	0.0269875	0.0831487	0.0257958	0.0333972	0.0428468	0.0415966	0.0492003	0.0569514	0.0305972	0.0436137	0.0749163	0.00350261	0.0106456	0.0175224	0.0558682	0.0257925	0.0142931	0.119441	0.122878	0.105497	0.0861575	0.0939954	0.0521283	0.0418823	0.0481324	0.0941501	0.0316548	0.0793275	0.0311601	0.0528376	0.0990388	0.105041
	124.898	0.0508193	0.095533	0.0777256	0.0486455	0.0280111	0.0133868	0.0505535	0.016316	0.0394712	0.0819142	0.0340623	0.0224133	0.0707462	0.119202	0.0387144	0.0392553	0.0253736	0.079144	0.0246132	0.0331577	0.0419993	0.0393961	0.0472531	0.0549091	0.029149	0.0419787	0.074426	0.00298466	0.01274	0.0170655	0.053785	0.023835	0.0133642	0.116534	0.116523	0.100721	0.0839955	0.0884914	0.0491589	0.0392337	0.0466219	0.0892889	0.0295888	0.075997	0.0290264	0.0509705	0.0969245	0.101635
	125.306	0.050434	0.0925835	0.0754597	0.0461029	0.025592	0.0131641	0.0489563	0.0146365	0.0372293	0.0797029	0.0325668	0.020827	0.0674897	0.114699	0.0393225	0.0373814	0.0238071	0.0751045	0.0234195	0.0329509	0.0411432	0.0372791	0.0453033	0.0528631	0.0277407	0.0402752	0.0737004	0.00262076	0.0146404	0.0166283	0.0517806	0.0219251	0.0125141	0.113554	0.110215	0.0959163	0.0817199	0.0830831	0.046273	0.0366553	0.0450313	0.0844494	0.0275885	0.0727532	0.0270134	0.0491956	0.0947857	0.0981844
	125.714	0.0499628	0.0895077	0.0732266	0.0435742	0.0232687	0.0129612	0.0473098	0.0130437	0.0350981	0.077466	0.0310436	0.0193054	0.0642191	0.109893	0.039741	0.035464	0.0222809	0.0710457	0.0222128	0.0327581	0.0402732	0.0352446	0.0433711	0.0508221	0.0263725	0.0384987	0.0727488	0.002396	0.0163456	0.0162036	0.0498556	0.0201135	0.0117507	0.110488	0.103939	0.0910983	0.0793301	0.0777849	0.0434765	0.0341542	0.0433752	0.0796415	0.0256479	0.0695884	0.0251193	0.0475091	0.0926451	0.0946961
	126.123	0.049387	0.0863239	0.0709781	0.041066	0.0210607	0.0127676	0.0456374	0.0115397	0.0330599	0.0751441	0.0294995	0.0178491	0.0609473	0.104784	0.0399744	0.0335249	0.0208025	0.066995	0.0209998	0.0325788	0.0393851	0.0332938	0.0414414	0.0487919	0.0250441	0.0366676	0.0715808	0.00228138	0.0178562	0.0157895	0.0479937	0.0184278	0.0110817	0.107337	0.0977718	0.0862855	0.0768289	0.0725753	0.0407508	0.0317318	0.0416671	0.0748666	0.0237841	0.0665025	0.0233502	0.0458965	0.0904644	0.0911698
	126.531	0.048679	0.0830351	0.0686772	0.0385667	0.0189542	0.0125886	0.0439301	0.0101293	0.0311273	0.0727885	0.0279463	0.0164586	0.0576595	0.0994172	0.0400258	0.0315557	0.0193639	0.0629609	0.0197764	0.0323779	0.0384848	0.0314241	0.0395403	0.0467545	0.0237567	0.0347937	0.0702146	0.00223781	0.0191626	0.0153833	0.0461794	0.0169199	0.0105122	0.104111	0.0916527	0.0814957	0.0742343	0.0674997	0.0381166	0.0293917	0.0399137	0.0701591	0.0219847	0.0634971	0.0217051	0.0443466	0.0882614	0.0876171
	126.939	0.0478419	0.0796509	0.0662769	0.0360941	0.0169709	0.0124146	0.0421935	0.00881951	0.0292777	0.0703514	0.026393	0.0151345	0.0543863	0.0938598	0.0398983	0.0295852	0.017976	0.0589648	0.0185539	0.0321687	0.03757	0.0296386	0.0376532	0.0447388	0.0225124	0.0328993	0.0686732	0.00222762	0.0202705	0.0149867	0.0444127	0.0156425	0.010039	0.100819	0.0856699	0.0767505	0.0715707	0.0625219	0.0355494	0.0271385	0.0381214	0.0654995	0.0202624	0.060578	0.0201839	0.0428458	0.0860214	0.0840385
	127.347	0.0468195	0.0761629	0.0637641	0.0336481	0.0151024	0.0122315	0.0404231	0.00761409	0.0275221	0.0678419	0.0248479	0.013877	0.0511289	0.0881994	0.0395816	0.0276111	0.0166382	0.0550165	0.0173331	0.0319133	0.0366535	0.0279321	0.0357857	0.0427162	0.021312	0.0310092	0.0669716	0.00222427	0.0211682	0.0146015	0.0426726	0.0146329	0.0096604	0.097487	0.0797912	0.0720642	0.0688635	0.057689	0.0330697	0.0249718	0.0362898	0.0609326	0.018615	0.0577563	0.0187877	0.041379	0.0837369	0.0804502
	127.755	0.0456354	0.0725735	0.0611232	0.0312452	0.0133544	0.0120358	0.0386026	0.00652833	0.0258479	0.0652632	0.0233194	0.0126858	0.0479133	0.0825335	0.039073	0.0256485	0.0153559	0.0511279	0.0161222	0.0316139	0.0357357	0.0263031	0.0339399	0.0407138	0.0201579	0.029136	0.0651315	0.00221027	0.021862	0.0142286	0.0409735	0.0139468	0.00936242	0.0941198	0.0740426	0.0674524	0.0661415	0.0529948	0.0306688	0.0228978	0.0344197	0.0564489	0.0170373	0.0550387	0.0175095	0.0399404	0.081428	0.0768615
	128.163	0.0442544	0.0688811	0.0583716	0.028903	0.0117374	0.0118015	0.0367422	0.00557097	0.0242516	0.062559	0.0218098	0.01156	0.0447639	0.0769357	0.0383593	0.0237161	0.0141382	0.0473158	0.0149305	0.0312497	0.0348235	0.0247455	0.0320923	0.0387217	0.0190488	0.0273037	0.0631573	0.00217859	0.0223494	0.0138701	0.0393067	0.0135797	0.0091345	0.0907353	0.0684736	0.062924	0.0634171	0.0484493	0.0283484	0.0209147	0.0325124	0.0520744	0.0155438	0.0524359	0.0163503	0.0385187	0.0790621	0.0732864
	128.571	0.0427011	0.0650918	0.0555368	0.026624	0.0102361	0.0115323	0.0348217	0.0047635	0.0227392	0.0597879	0.0203248	0.0104981	0.0416823	0.0714618	0.0374381	0.0218064	0.0129794	0.0435857	0.0137575	0.0307959	0.0339169	0.0232507	0.0302642	0.0367383	0.017984	0.0255125	0.0610564	0.00212787	0.0226339	0.0135224	0.0376829	0.013543	0.00895758	0.0873289	0.0630241	0.058485	0.0606994	0.0440989	0.026127	0.0190265	0.0305709	0.0478358	0.0141161	0.0499472	0.0152983	0.037116	0.0766755	0.0697431
	128.98	0.0410012	0.0612259	0.0526508	0.0244334	0.0088753	0.011212	0.032863	0.00412004	0.0212888	0.0568685	0.0188638	0.00949816	0.0387005	0.0661155	0.036311	0.0199519	0.0118915	0.0399591	0.0126172	0.0302599	0.0330074	0.0218141	0.0284241	0.0347877	0.0169598	0.0237738	0.0588276	0.00206006	0.0227287	0.013183	0.036113	0.0137761	0.00881398	0.083893	0.0578038	0.0541422	0.0579793	0.0399049	0.0239816	0.0172333	0.0286058	0.0437222	0.0127715	0.0475708	0.0143503	0.0357305	0.0742339	0.0662378
	129.388	0.0391567	0.0573024	0.0497643	0.022319	0.00763307	0.0108448	0.030867	0.00365367	0.0199194	0.0538705	0.0174303	0.0085581	0.0357958	0.0608676	0.0349854	0.0181374	0.0108608	0.036441	0.011503	0.0296007	0.0320903	0.0204244	0.0265951	0.0328394	0.0159713	0.0220871	0.0564661	0.00198111	0.0226344	0.012844	0.0345882	0.0142344	0.00868716	0.0804154	0.0527253	0.0498979	0.0552405	0.0359387	0.0219467	0.0155343	0.0266287	0.0397892	0.0114999	0.0452951	0.0134936	0.0343659	0.0717552	0.0627893
	129.796	0.0372445	0.0533606	0.0468942	0.0202933	0.00652828	0.0104403	0.0288528	0.0033625	0.0186005	0.0507663	0.0160268	0.00767609	0.0329807	0.0556567	0.0334854	0.0163837	0.00989035	0.0330491	0.0104234	0.0288445	0.0311445	0.0190802	0.0247722	0.0309336	0.0150141	0.0204523	0.0539782	0.00189592	0.0223746	0.0124975	0.0331255	0.0148429	0.00855786	0.0768685	0.0478669	0.0457629	0.0524668	0.0321483	0.0199899	0.0139321	0.0246587	0.0360031	0.0102999	0.0431019	0.0127177	0.0330276	0.0692326	0.0593964
	130.204	0.0352393	0.0494294	0.0440707	0.0183428	0.00555427	0.00999427	0.0268515	0.00322018	0.0173459	0.0475724	0.0146568	0.00685026	0.0302314	0.0504041	0.0318311	0.0146944	0.00896878	0.0297916	0.00937613	0.0279663	0.0301611	0.0177754	0.0229558	0.0290415	0.0140818	0.0188815	0.0513626	0.00181225	0.0219508	0.0121351	0.0316995	0.0155327	0.00841716	0.0732464	0.0432136	0.0417457	0.0496385	0.0285667	0.0181331	0.0124219	0.0227137	0.0324081	0.00918481	0.040974	0.012013	0.0317128	0.066645	0.0560684
	130.612	0.0332074	0.0455465	0.0412748	0.0164548	0.00470573	0.00953432	0.0248649	0.00319147	0.0161362	0.0443642	0.013329	0.00607943	0.027526	0.0450557	0.030057	0.0130589	0.00808381	0.0266748	0.00835723	0.0269855	0.0291209	0.0165109	0.021181	0.0271822	0.0131717	0.0173737	0.0486412	0.00173626	0.0213826	0.0117479	0.0303113	0.0162589	0.00825108	0.0695275	0.0387282	0.037863	0.0467566	0.0251889	0.0163626	0.011007	0.020811	0.0289871	0.00813114	0.0388866	0.0113621	0.0304258	0.0640223	0.0528047
	131.02	0.0311212	0.0417364	0.0384835	0.0146314	0.00400062	0.00904698	0.0229348	0.00322513	0.0149613	0.0410785	0.0120482	0.00536272	0.0248656	0.0395705	0.0281865	0.0115085	0.007236	0.0237086	0.00737605	0.0259193	0.0280167	0.0152898	0.0194196	0.0253627	0.0122801	0.0159546	0.0458314	0.00167443	0.0206772	0.0113327	0.0289409	0.0169503	0.00805807	0.0657244	0.0345151	0.0341331	0.0438258	0.021964	0.0146623	0.00968192	0.0189651	0.0257309	0.00716272	0.036827	0.0107598	0.0291555	0.0613193	0.0496013
	131.429	0.0289721	0.0380118	0.0356549	0.0128435	0.00340625	0.0085497	0.0210462	0.00329076	0.0138278	0.0378552	0.0108256	0.00469933	0.0222098	0.0339745	0.0262425	0.0100133	0.00640279	0.020888	0.00642087	0.02476	0.0268461	0.0141122	0.0177199	0.0235597	0.0114081	0.0146316	0.042965	0.00163243	0.0198379	0.0108856	0.0275654	0.0175966	0.00783414	0.0618485	0.0304354	0.0305729	0.0408737	0.0189638	0.0130563	0.00844752	0.0171807	0.0226715	0.00625835	0.0347807	0.010187	0.0278971	0.0585803	0.0464655
	131.837	0.0267701	0.0343801	0.0327263	0.0111131	0.00295164	0.00803117	0.0192162	0.00335208	0.0126986	0.0346028	0.00966575	0.0040888	0.0195886	0.0283282	0.0242387	0.00860865	0.00559703	0.018221	0.00550881	0.0235595	0.0256088	0.0129864	0.0160501	0.0218188	0.0105572	0.0134294	0.0400779	0.00161226	0.0188805	0.0104104	0.0261898	0.0181402	0.0075802	0.0579289	0.0266422	0.0272035	0.0379364	0.0160803	0.0114926	0.00730137	0.0154596	0.0197442	0.00542043	0.0327471	0.00964085	0.0266385	0.0557779	0.0433879
	132.245	0.0244281	0.030826	0.0296749	0.00942104	0.00258672	0.00747556	0.0174318	0.00339559	0.0116038	0.031408	0.00857481	0.00352989	0.0169807	0.0227553	0.0221736	0.00728428	0.00480107	0.0156985	0.00463487	0.0222877	0.0243219	0.0119086	0.0144218	0.0200942	0.00973067	0.0123635	0.0371966	0.00161538	0.0177936	0.00991154	0.0247843	0.018583	0.00730102	0.0540128	0.0230241	0.0240336	0.0350503	0.0134144	0.0100226	0.00624011	0.0137938	0.0170184	0.004659	0.0307318	0.00910772	0.0253672	0.0529336	0.0403832
	132.653	0.0220114	0.0273427	0.0264509	0.00779342	0.0023234	0.00689037	0.0156665	0.00340251	0.0104992	0.0282597	0.00755441	0.00302132	0.0144223	0.0174281	0.0200497	0.00604033	0.004029	0.0133256	0.00380995	0.020989	0.0229919	0.0108819	0.0128407	0.0184314	0.00893405	0.0114398	0.0343578	0.00163728	0.0165992	0.00939633	0.0233732	0.0189015	0.00699406	0.0501287	0.0196271	0.0210733	0.0322575	0.0109041	0.00859553	0.00526587	0.0121742	0.0144285	0.00394045	0.0287446	0.00858269	0.0240801	0.0500705	0.0374484
	133.061	0.0194281	0.0239099	0.0230843	0.00624831	0.00211688	0.0062341	0.0139323	0.00336091	0.00941435	0.0250837	0.00660043	0.00256083	0.0119458	0.0125484	0.0178544	0.00491648	0.0032851	0.011098	0.00304949	0.0196418	0.0216412	0.00989963	0.0112557	0.0168118	0.00816929	0.0106724	0.03157	0.00167411	0.0152888	0.00887455	0.0219488	0.0190835	0.00666547	0.0463307	0.016524	0.0183201	0.0295724	0.0085656	0.00724693	0.00437181	0.0105928	0.0120199	0.0033013	0.0268061	0.00806359	0.0227676	0.0471677	0.0345963
	133.469	0.0167616	0.0205262	0.0195904	0.00479075	0.00194293	0.00553632	0.0121786	0.00326683	0.00833476	0.0220265	0.00571168	0.0021456	0.0095626	0.00841026	0.0155929	0.00386704	0.00256903	0.0090201	0.00234618	0.0182398	0.0202754	0.00895291	0.00972669	0.015232	0.00744067	0.01004	0.028849	0.00171856	0.013883	0.00835086	0.0205271	0.0191475	0.006308	0.042627	0.0135375	0.0157667	0.0270047	0.00650392	0.0059831	0.00356322	0.00904232	0.00980692	0.00270424	0.0249252	0.00754059	0.021439	0.0442901	0.0318376
Figure 4-figure supplement 2A (F2)	Distance(nm)	ACF1	ACF2	ACF3	ACF4	ACF5	ACF6	ACF7	ACF8	ACF9	ACF10	ACF11	ACF12	ACF13	ACF14	ACF15	ACF16	ACF17	ACF18	ACF19	ACF20	ACF21	ACF22	ACF23	ACF24	ACF25	ACF26	ACF27	ACF28	ACF29	ACF30	ACF31	ACF32	ACF33	ACF34	ACF35	ACF36	ACF37	ACF38	ACF39	ACF40	ACF41	ACF42	ACF43	ACF44	ACF45	ACF46	ACF47	ACF48
	0	1.00005	1.00005	1	1.00001	1	1.00002	1.00003	1	1	1.00003	1.00001	1.00001	1	1	1.00004	1	1	1.00001	1.00001	1.00002	1.00003	1.00002	1.00002	1	1.00001	1	1.00002	1.00001	1.00002	1	1.00001	1.00001	1	1.00006	1	1.00004	1.00001	1.00001	1	1	1.00002	1	1	1.00005	1	1.00001	1.00002	1.00001
	0.408163	0.997741	0.998165	0.998582	0.999083	0.998883	0.998774	0.999105	0.999456	0.99874	0.99715	0.998876	0.999651	0.997899	0.998414	0.998429	0.99896	0.999302	0.997746	0.999122	0.998394	0.99809	0.999254	0.998579	0.999057	0.999518	0.998353	0.998841	0.999289	0.998367	0.999398	0.998781	0.998066	0.998958	0.998749	0.997886	0.998892	0.999077	0.997479	0.998852	0.99901	0.999048	0.998215	0.999167	0.999101	0.999046	0.999228	0.998417	0.999006
	0.816327	0.993555	0.994534	0.994957	0.996949	0.996315	0.996161	0.997097	0.99806	0.995969	0.992503	0.996205	0.998632	0.994428	0.994141	0.995267	0.996658	0.997939	0.993242	0.996845	0.994878	0.994109	0.99724	0.996213	0.997626	0.99812	0.994088	0.995818	0.997269	0.995013	0.997694	0.99595	0.99407	0.996492	0.99562	0.99459	0.995882	0.996674	0.993431	0.996765	0.997142	0.996662	0.995098	0.997331	0.996645	0.996947	0.997363	0.995827	0.996799
	1.22449	0.988399	0.989857	0.989587	0.993865	0.992542	0.992577	0.994318	0.995935	0.992014	0.987339	0.992303	0.996998	0.990414	0.987759	0.991151	0.993377	0.996145	0.987183	0.993352	0.989935	0.988714	0.994159	0.993512	0.996118	0.995894	0.987535	0.991326	0.994022	0.990479	0.994976	0.991906	0.988614	0.992841	0.991099	0.990973	0.991306	0.993117	0.988907	0.994142	0.994715	0.993099	0.991287	0.994701	0.992991	0.993944	0.994643	0.992917	0.993731
	1.63265	0.981343	0.983543	0.982597	0.989691	0.987274	0.987682	0.990592	0.993052	0.986518	0.980167	0.986977	0.994779	0.984776	0.979654	0.985618	0.988857	0.993673	0.978717	0.988593	0.983122	0.981311	0.990035	0.989768	0.993962	0.992882	0.97859	0.985468	0.989557	0.984213	0.991277	0.986489	0.981096	0.987798	0.985127	0.985788	0.985236	0.988532	0.982531	0.99048	0.991308	0.98826	0.985913	0.991045	0.98825	0.989761	0.991022	0.988884	0.989645
	2.04082	0.973387	0.976357	0.974427	0.984708	0.980797	0.981913	0.986246	0.989535	0.979845	0.972353	0.980541	0.99203	0.978467	0.970341	0.97931	0.983405	0.990786	0.968638	0.982753	0.974946	0.972586	0.98505	0.985629	0.991603	0.989165	0.967601	0.978593	0.983966	0.976793	0.986689	0.980099	0.972188	0.981623	0.978126	0.980006	0.977969	0.983202	0.975455	0.986239	0.98728	0.982401	0.979713	0.986594	0.98271	0.984672	0.986732	0.984475	0.984894
	2.44898	0.964176	0.968086	0.965272	0.978902	0.973012	0.975154	0.981248	0.985398	0.971855	0.963241	0.972956	0.98879	0.971004	0.960205	0.97208	0.976934	0.987382	0.956592	0.975855	0.965242	0.962315	0.979273	0.980778	0.988774	0.984802	0.95461	0.970858	0.977297	0.968006	0.981268	0.972733	0.961678	0.974253	0.970156	0.97304	0.969638	0.977279	0.967062	0.981201	0.982441	0.975527	0.972284	0.981254	0.976516	0.978566	0.981801	0.979329	0.979465
	2.85714	0.954119	0.95909	0.955441	0.972425	0.964058	0.967614	0.975763	0.98072	0.962706	0.953358	0.964372	0.985106	0.962765	0.949633	0.964224	0.969594	0.983577	0.942928	0.968014	0.954246	0.950827	0.972825	0.97546	0.98562	0.979864	0.939822	0.962502	0.969631	0.958092	0.975087	0.964612	0.949884	0.965815	0.961471	0.965228	0.960451	0.970952	0.957745	0.975552	0.976933	0.967794	0.963921	0.975129	0.969867	0.971575	0.976368	0.973746	0.973546
	3.26531	0.943367	0.94949	0.945132	0.965356	0.954018	0.959378	0.969868	0.975551	0.952458	0.942837	0.954875	0.981016	0.953834	0.938894	0.955866	0.961465	0.979408	0.92777	0.959312	0.942049	0.938246	0.965786	0.969734	0.982171	0.974414	0.923383	0.953682	0.961045	0.947144	0.968206	0.955853	0.936959	0.956376	0.952204	0.956624	0.950548	0.964351	0.947606	0.969343	0.970793	0.959297	0.954681	0.968268	0.962893	0.963749	0.970514	0.967785	0.967234
	3.67347	0.931821	0.939269	0.934457	0.957719	0.942921	0.950449	0.963568	0.969925	0.941099	0.93151	0.944469	0.976544	0.944106	0.928128	0.94699	0.952568	0.974861	0.911104	0.949798	0.928655	0.924586	0.958198	0.963517	0.978341	0.968501	0.90536	0.944483	0.951607	0.935116	0.960672	0.946488	0.92293	0.945951	0.942408	0.947067	0.940006	0.957537	0.936444	0.962536	0.963992	0.950091	0.944493	0.960677	0.955658	0.9551	0.964271	0.961361	0.960551
	4.08163	0.91983	0.928679	0.923529	0.949614	0.930947	0.940994	0.956963	0.963899	0.928783	0.919879	0.933279	0.971714	0.933937	0.917396	0.937818	0.943064	0.970032	0.893298	0.93957	0.914272	0.91014	0.950117	0.957047	0.974302	0.962178	0.885915	0.934994	0.941406	0.922227	0.952531	0.936655	0.908123	0.934662	0.932195	0.936936	0.928911	0.950566	0.924693	0.955313	0.956686	0.9403	0.933653	0.952478	0.948223	0.945768	0.957718	0.954731	0.953619
	4.4898	0.907118	0.917535	0.912307	0.941002	0.918104	0.930931	0.949978	0.957479	0.915441	0.90755	0.921257	0.966534	0.923056	0.906619	0.928205	0.93294	0.964858	0.874233	0.928647	0.898815	0.894805	0.941532	0.950138	0.969912	0.955477	0.865056	0.925184	0.930508	0.908336	0.943806	0.926287	0.892478	0.922486	0.92149	0.925929	0.917247	0.943406	0.911991	0.947559	0.948796	0.929934	0.921976	0.943655	0.94055	0.935728	0.950826	0.947671	0.946376
	4.89796	0.893936	0.906029	0.900808	0.931949	0.904571	0.920394	0.942673	0.950711	0.901208	0.894938	0.908494	0.961015	0.91177	0.895704	0.91831	0.922347	0.959418	0.854269	0.917115	0.882469	0.878849	0.932467	0.94299	0.965314	0.948439	0.842913	0.91507	0.919004	0.893616	0.934531	0.915467	0.876295	0.909531	0.910336	0.914384	0.90504	0.936047	0.898685	0.939437	0.940471	0.9191	0.90974	0.934327	0.932637	0.925118	0.943637	0.940396	0.938902
	5.30612	0.880151	0.894041	0.888957	0.922431	0.890413	0.909343	0.934994	0.943603	0.886072	0.881851	0.89499	0.955163	0.899942	0.884509	0.908055	0.911319	0.953679	0.833417	0.905008	0.865209	0.862252	0.922913	0.935514	0.960448	0.941094	0.819534	0.9046	0.90697	0.878009	0.924725	0.904149	0.859612	0.895808	0.898655	0.902171	0.89226	0.928442	0.884622	0.930899	0.931694	0.907827	0.89687	0.924516	0.92443	0.913953	0.936125	0.932776	0.931159
	5.71429	0.865807	0.881626	0.87673	0.912474	0.875752	0.897833	0.92695	0.936184	0.870092	0.86839	0.88079	0.948986	0.88766	0.872932	0.897481	0.899947	0.947665	0.811888	0.892393	0.847126	0.845164	0.912883	0.92776	0.955342	0.933483	0.795016	0.893766	0.894497	0.861569	0.914416	0.892353	0.842605	0.881382	0.886439	0.889383	0.878913	0.920573	0.869864	0.922004	0.922531	0.896195	0.883484	0.914296	0.915911	0.90232	0.928302	0.924859	0.923173
	6.12245	0.85103	0.86885	0.864129	0.902116	0.860728	0.885927	0.918566	0.928483	0.853351	0.854712	0.865977	0.942502	0.875031	0.860926	0.886667	0.888339	0.941405	0.789912	0.879344	0.828321	0.827732	0.90241	0.919807	0.950055	0.92565	0.769502	0.882579	0.881679	0.844392	0.903639	0.880121	0.825474	0.866328	0.873694	0.876152	0.865028	0.912447	0.854567	0.912823	0.913061	0.884289	0.8697	0.903743	0.907084	0.890301	0.920186	0.916706	0.914989
	6.53061	0.835739	0.85568	0.851168	0.891367	0.845414	0.873625	0.909834	0.920517	0.835856	0.840675	0.850582	0.935731	0.861969	0.848497	0.875589	0.876543	0.934883	0.767578	0.865922	0.808816	0.810009	0.891525	0.911586	0.94452	0.917643	0.743099	0.871061	0.868606	0.826454	0.892431	0.867455	0.808294	0.850681	0.860419	0.862368	0.850639	0.904081	0.838586	0.903334	0.90328	0.872177	0.855493	0.892889	0.897966	0.877933	0.911787	0.908233	0.906614
	6.93878	0.820217	0.842324	0.837952	0.880319	0.829982	0.861063	0.900844	0.912336	0.817744	0.826633	0.834746	0.928704	0.848727	0.83575	0.86443	0.864703	0.928172	0.745254	0.852235	0.788797	0.792261	0.880304	0.903266	0.93885	0.909523	0.716021	0.859306	0.855385	0.807942	0.880846	0.854473	0.791356	0.834564	0.846715	0.848301	0.835849	0.895554	0.822232	0.893676	0.893316	0.859993	0.841099	0.881838	0.888633	0.865338	0.903171	0.899624	0.898161
	7.34694	0.804414	0.828766	0.824567	0.869001	0.814502	0.848244	0.891612	0.903959	0.79903	0.812428	0.818528	0.921453	0.835205	0.822815	0.85319	0.852863	0.921255	0.723024	0.838353	0.768289	0.774534	0.868807	0.894773	0.932974	0.901348	0.688424	0.847387	0.842109	0.788852	0.868933	0.841206	0.774722	0.818017	0.832623	0.833817	0.820738	0.886933	0.80537	0.883821	0.883157	0.847812	0.826469	0.870613	0.879151	0.852542	0.894366	0.890787	0.889659
	7.7551	0.788568	0.815224	0.811177	0.85751	0.799124	0.835301	0.882237	0.895436	0.779839	0.798347	0.802061	0.914018	0.821621	0.809878	0.842042	0.841153	0.9142	0.701252	0.824387	0.747476	0.757088	0.857122	0.88624	0.926969	0.893181	0.660536	0.835436	0.828883	0.769351	0.856754	0.827783	0.758648	0.801161	0.818282	0.819126	0.805439	0.878322	0.788235	0.873889	0.872914	0.835774	0.811819	0.859305	0.869627	0.839659	0.885454	0.881886	0.881229
	8.16327	0.772757	0.801763	0.797911	0.845905	0.783944	0.822278	0.872771	0.886797	0.760231	0.784392	0.785445	0.906436	0.807991	0.797114	0.831053	0.829644	0.907022	0.680114	0.810421	0.726441	0.740031	0.845326	0.877673	0.920829	0.885083	0.632561	0.823555	0.815799	0.749513	0.844363	0.814277	0.743249	0.784071	0.803773	0.804233	0.79006	0.869809	0.770863	0.863907	0.862617	0.823973	0.797185	0.847959	0.860145	0.826737	0.876486	0.872922	0.872935
	8.57143	0.757051	0.788499	0.784909	0.834246	0.76906	0.80924	0.863272	0.878072	0.740277	0.770619	0.768767	0.898742	0.794379	0.784675	0.820301	0.818411	0.899748	0.659862	0.79654	0.705299	0.723524	0.833484	0.869095	0.91455	0.877107	0.604698	0.811845	0.802943	0.729416	0.831812	0.800766	0.728657	0.766833	0.789196	0.789179	0.774705	0.861471	0.753295	0.853922	0.852317	0.812512	0.782669	0.836626	0.850781	0.813844	0.86752	0.863943	0.864848
	8.97959	0.741622	0.775565	0.772287	0.822602	0.754591	0.796268	0.853808	0.869291	0.720082	0.757198	0.75215	0.890968	0.780923	0.772674	0.809898	0.807548	0.892422	0.64077	0.782832	0.68419	0.707736	0.821662	0.860594	0.908194	0.8693	0.577175	0.800393	0.790396	0.7092	0.819149	0.787336	0.715028	0.74955	0.77464	0.77412	0.759468	0.853371	0.735733	0.844018	0.842095	0.801489	0.768413	0.825377	0.841597	0.801059	0.858612	0.855046	0.85705
	9.38776	0.726398	0.762957	0.760104	0.810987	0.740588	0.783354	0.844383	0.860466	0.69967	0.743987	0.735643	0.883135	0.767551	0.761152	0.799823	0.79708	0.88503	0.622966	0.769347	0.663161	0.692715	0.809893	0.852103	0.901705	0.861694	0.55016	0.789232	0.77822	0.688869	0.806406	0.773997	0.70237	0.732273	0.76013	0.758975	0.744393	0.845531	0.718086	0.834177	0.831954	0.790956	0.754413	0.814231	0.832608	0.788405	0.849778	0.846171	0.849549
	9.79592	0.711539	0.750808	0.748418	0.799453	0.727163	0.770575	0.83505	0.851615	0.67915	0.731188	0.719356	0.875265	0.754427	0.750116	0.790172	0.787095	0.877618	0.606742	0.756155	0.642365	0.678631	0.798215	0.843726	0.895158	0.854315	0.523875	0.778398	0.766477	0.668569	0.793614	0.760808	0.690816	0.715108	0.745722	0.743945	0.729529	0.837968	0.700587	0.824495	0.821988	0.780991	0.740849	0.803259	0.823827	0.775967	0.841055	0.837442	0.842407
	10.2041	0.696959	0.739059	0.73721	0.787988	0.714344	0.757893	0.82579	0.842734	0.658541	0.718629	0.703337	0.867369	0.741451	0.739509	0.78089	0.777594	0.870162	0.592153	0.743285	0.621826	0.665468	0.786638	0.83539	0.88851	0.847175	0.498487	0.767869	0.755203	0.648301	0.780787	0.74774	0.680305	0.698097	0.731388	0.728953	0.714874	0.830661	0.683165	0.814943	0.812192	0.771607	0.72769	0.792473	0.815225	0.763749	0.832432	0.828774	0.835605
	10.6122	0.682718	0.72778	0.726473	0.77661	0.702196	0.745344	0.816622	0.833826	0.637921	0.706392	0.687667	0.859459	0.728705	0.729265	0.772011	0.768622	0.862682	0.579398	0.73078	0.601664	0.653331	0.775176	0.82714	0.881788	0.840281	0.474199	0.757636	0.744433	0.628159	0.76794	0.734806	0.670877	0.681324	0.717144	0.714119	0.700435	0.823595	0.665951	0.805576	0.80263	0.762843	0.715063	0.78192	0.806777	0.75181	0.823916	0.820233	0.829163
	11.0204	0.668826	0.716944	0.716162	0.765316	0.690749	0.732913	0.807544	0.824885	0.61734	0.694428	0.672421	0.851543	0.716167	0.719311	0.763517	0.760189	0.85517	0.56851	0.71866	0.581935	0.642203	0.763839	0.818967	0.875003	0.833631	0.451204	0.747666	0.734186	0.608205	0.75508	0.721983	0.66247	0.664848	0.702961	0.699469	0.686201	0.816747	0.649007	0.796402	0.793322	0.754699	0.702988	0.771621	0.79845	0.740162	0.815495	0.811796	0.823075
	11.4286	0.655241	0.706541	0.706237	0.754099	0.680006	0.720586	0.798551	0.815901	0.596834	0.682654	0.657657	0.843631	0.703796	0.709587	0.755378	0.752289	0.847615	0.559525	0.706941	0.562709	0.632086	0.752634	0.810837	0.868126	0.82722	0.429688	0.737929	0.72447	0.588476	0.742212	0.709248	0.655006	0.648722	0.688829	0.684993	0.672162	0.810097	0.63233	0.787418	0.784283	0.747172	0.691489	0.761587	0.790214	0.72882	0.807156	0.803441	0.817328
	11.8367	0.642072	0.696614	0.696676	0.742978	0.669994	0.70839	0.789672	0.806875	0.576487	0.67116	0.643475	0.835735	0.691666	0.700073	0.747636	0.744938	0.840034	0.552462	0.695644	0.54409	0.622994	0.741583	0.802805	0.861209	0.82104	0.409863	0.728421	0.715286	0.569094	0.729346	0.696611	0.648444	0.633028	0.674764	0.67082	0.658329	0.80365	0.616102	0.778677	0.775562	0.740262	0.680652	0.751851	0.782064	0.717813	0.798904	0.795228	0.811945
	12.2449	0.629249	0.687108	0.687449	0.73194	0.66067	0.696286	0.780899	0.797794	0.556314	0.659779	0.629926	0.827867	0.679672	0.690771	0.740236	0.738097	0.832403	0.547194	0.684768	0.526115	0.614844	0.7307	0.794801	0.854201	0.815082	0.391893	0.719125	0.706623	0.550079	0.716486	0.68404	0.642626	0.617802	0.660758	0.656866	0.644701	0.797406	0.600262	0.770143	0.767136	0.733934	0.670426	0.742397	0.773989	0.707122	0.790723	0.787087	0.806907
	12.6531	0.616895	0.678106	0.678572	0.721017	0.652037	0.684319	0.772278	0.788664	0.536403	0.648637	0.617108	0.820044	0.667913	0.681728	0.73324	0.731773	0.824747	0.543694	0.674328	0.508916	0.607655	0.720014	0.786891	0.847148	0.809336	0.375962	0.710068	0.698466	0.531564	0.703646	0.671569	0.637509	0.603129	0.646867	0.643271	0.631312	0.791393	0.585006	0.761877	0.759056	0.728183	0.660909	0.733251	0.766012	0.696776	0.782633	0.779109	0.80225
	13.0612	0.604983	0.669558	0.670044	0.710209	0.644036	0.672461	0.763818	0.779477	0.516779	0.637609	0.605076	0.812281	0.656309	0.672998	0.726614	0.725918	0.817048	0.541736	0.664315	0.492533	0.601309	0.709543	0.779027	0.840027	0.803789	0.362187	0.701255	0.690787	0.513593	0.690835	0.659185	0.63292	0.589048	0.633108	0.629981	0.61818	0.785632	0.570323	0.753853	0.751297	0.722962	0.652038	0.724392	0.758142	0.686743	0.77463	0.771243	0.797967
	13.4694	0.593553	0.66152	0.661898	0.699534	0.636628	0.660732	0.755547	0.770239	0.497498	0.626729	0.593892	0.804592	0.644897	0.664644	0.720382	0.720511	0.809319	0.541206	0.654728	0.477081	0.595784	0.699307	0.771226	0.832839	0.798426	0.35066	0.692717	0.683557	0.496258	0.678062	0.646907	0.628771	0.575623	0.619537	0.617054	0.605337	0.780148	0.556315	0.746099	0.743877	0.718241	0.643857	0.715824	0.750401	0.67703	0.76673	0.763538	0.794076
	13.8775	0.582645	0.653979	0.654148	0.689004	0.629758	0.649133	0.747488	0.760951	0.478605	0.615984	0.583611	0.79699	0.633676	0.656718	0.714543	0.715513	0.801561	0.541861	0.645553	0.462625	0.590977	0.68932	0.763492	0.825607	0.793227	0.341406	0.684468	0.676736	0.479639	0.665338	0.634742	0.624931	0.562901	0.606189	0.604521	0.592804	0.77496	0.54307	0.738622	0.736793	0.71397	0.63634	0.707534	0.742798	0.667616	0.758941	0.756002	0.790583
	14.2857	0.572189	0.646913	0.646805	0.67861	0.623348	0.637641	0.739633	0.75161	0.460116	0.605272	0.574245	0.789482	0.622586	0.649237	0.709057	0.710868	0.79376	0.543487	0.636764	0.449237	0.586792	0.679575	0.755778	0.818292	0.788168	0.334377	0.676508	0.670278	0.463767	0.652664	0.622674	0.621253	0.550913	0.593086	0.592337	0.580587	0.770065	0.530572	0.731403	0.730019	0.710086	0.629445	0.699496	0.735325	0.658471	0.751257	0.748608	0.78747
	14.6939	0.562246	0.640335	0.639869	0.668363	0.617352	0.626271	0.732001	0.742221	0.442085	0.594664	0.565833	0.782074	0.611682	0.642195	0.703935	0.706548	0.785929	0.545881	0.62834	0.437006	0.583157	0.67007	0.748123	0.810937	0.783221	0.329479	0.668834	0.664138	0.448737	0.640045	0.610712	0.617652	0.539707	0.580256	0.580596	0.568689	0.765459	0.518965	0.724474	0.723569	0.70653	0.623186	0.691708	0.727972	0.649589	0.743682	0.741408	0.78474
	15.102	0.5527	0.634152	0.633303	0.65823	0.611674	0.614973	0.724557	0.732775	0.424501	0.583993	0.558353	0.774763	0.600853	0.635538	0.699092	0.702475	0.778039	0.548761	0.620236	0.425955	0.579915	0.660777	0.740451	0.803499	0.77835	0.326525	0.661408	0.658258	0.434541	0.627474	0.598806	0.613952	0.529285	0.567677	0.569205	0.557082	0.761109	0.508178	0.717786	0.717392	0.703215	0.617456	0.684128	0.720696	0.640918	0.736192	0.734325	0.782343
	15.5102	0.543568	0.628367	0.627074	0.648206	0.606264	0.603755	0.717298	0.723274	0.407404	0.573314	0.551806	0.767547	0.59014	0.629197	0.694518	0.698617	0.770098	0.551966	0.612418	0.416171	0.577005	0.651674	0.732789	0.796003	0.77352	0.325312	0.654199	0.65259	0.42125	0.614947	0.586946	0.610088	0.519679	0.555354	0.558242	0.545742	0.756982	0.498324	0.711365	0.711494	0.70007	0.61227	0.676747	0.713462	0.632448	0.728775	0.727402	0.780263
	15.9184	0.534778	0.622871	0.621108	0.638259	0.601042	0.592572	0.710188	0.713711	0.390785	0.562517	0.546161	0.760419	0.579464	0.623081	0.690135	0.694905	0.762078	0.555215	0.604834	0.407655	0.57426	0.642726	0.725091	0.788438	0.76869	0.325567	0.647148	0.647076	0.40886	0.602454	0.57508	0.605914	0.510881	0.543243	0.54765	0.534626	0.753034	0.48936	0.705175	0.705831	0.696999	0.607516	0.669529	0.70622	0.624131	0.721396	0.720577	0.778447
	16.3265	0.526281	0.617625	0.615344	0.628369	0.595945	0.581413	0.703201	0.704084	0.374653	0.551577	0.541381	0.753372	0.568801	0.617103	0.6859	0.69129	0.753972	0.558361	0.59744	0.400459	0.571604	0.633903	0.717341	0.780791	0.763823	0.327023	0.640208	0.641667	0.397388	0.589989	0.563174	0.601354	0.502891	0.53133	0.53743	0.523695	0.749225	0.481306	0.69921	0.700382	0.693922	0.603163	0.662448	0.698927	0.615941	0.714033	0.713842	0.776858
	16.7347	0.518092	0.612561	0.609707	0.618523	0.590923	0.570268	0.696322	0.694393	0.35902	0.540502	0.537437	0.746403	0.558151	0.611195	0.681779	0.68773	0.745774	0.561192	0.590192	0.394582	0.568911	0.625178	0.709546	0.773088	0.758884	0.3294	0.633332	0.636317	0.38686	0.577546	0.551202	0.596333	0.495704	0.519584	0.527602	0.512917	0.745525	0.474189	0.69347	0.695124	0.690758	0.599145	0.655483	0.69155	0.607848	0.706659	0.707192	0.775464
	17.1429	0.510127	0.607603	0.604136	0.608696	0.58591	0.559111	0.689516	0.684639	0.343868	0.529199	0.534269	0.739507	0.547437	0.605307	0.677709	0.684165	0.737461	0.563549	0.583044	0.390021	0.566081	0.616525	0.701658	0.765293	0.75384	0.332423	0.62648	0.630981	0.377246	0.565123	0.539125	0.590766	0.489293	0.507985	0.518091	0.502262	0.741908	0.467936	0.687921	0.69001	0.687425	0.595375	0.648593	0.684066	0.599813	0.699248	0.700571	0.774221
	17.551	0.502451	0.602742	0.59859	0.598902	0.580882	0.547968	0.682789	0.674834	0.329223	0.517768	0.531847	0.732684	0.53672	0.599431	0.673704	0.680576	0.729047	0.565323	0.575966	0.386782	0.563056	0.607934	0.693721	0.757443	0.748668	0.335858	0.619641	0.625627	0.368583	0.552726	0.526952	0.58465	0.483653	0.496541	0.508965	0.491724	0.738371	0.462618	0.682591	0.685038	0.683868	0.591836	0.641769	0.676473	0.591824	0.691793	0.694022	0.773121
	17.9592	0.495008	0.597899	0.593034	0.589129	0.575787	0.53682	0.676116	0.664982	0.315061	0.506123	0.530105	0.725936	0.525929	0.593576	0.66971	0.676912	0.720513	0.566354	0.56892	0.384811	0.559728	0.599391	0.685689	0.749512	0.743347	0.339473	0.612799	0.620224	0.360822	0.54036	0.514663	0.57792	0.478744	0.485242	0.500135	0.481297	0.73491	0.458127	0.677443	0.680151	0.680019	0.588418	0.634968	0.668774	0.583839	0.684276	0.687484	0.77213
	18.3673	0.487836	0.593096	0.587471	0.579396	0.570617	0.525705	0.669507	0.655104	0.3014	0.494358	0.528999	0.719264	0.51512	0.587781	0.665749	0.673162	0.711874	0.566611	0.561889	0.384104	0.556087	0.590892	0.677597	0.741516	0.737861	0.343095	0.605969	0.614751	0.353978	0.528042	0.502283	0.570608	0.474553	0.474122	0.491649	0.471	0.731539	0.454508	0.672504	0.675344	0.675843	0.585119	0.628181	0.66099	0.575856	0.676707	0.681	0.771253
	18.7755	0.480936	0.588283	0.581898	0.569715	0.56535	0.514629	0.662953	0.645215	0.28823	0.482467	0.528469	0.712673	0.504285	0.582086	0.661803	0.6693	0.703128	0.565974	0.554848	0.384577	0.552054	0.582434	0.669439	0.733463	0.732201	0.346558	0.599162	0.609194	0.348009	0.515788	0.489822	0.5627	0.471038	0.463191	0.483469	0.460845	0.728269	0.451686	0.667762	0.67058	0.671296	0.581854	0.62138	0.653138	0.567843	0.669082	0.674546	0.770471
	19.1837	0.474276	0.583468	0.576337	0.560093	0.559981	0.503612	0.656447	0.635334	0.275543	0.470467	0.528447	0.706165	0.493426	0.576524	0.657865	0.665308	0.694279	0.564437	0.547784	0.386194	0.547627	0.574009	0.66121	0.725337	0.726358	0.349744	0.592396	0.603541	0.34288	0.503615	0.477296	0.554223	0.468167	0.452481	0.475574	0.450854	0.725108	0.449625	0.663217	0.665835	0.666351	0.578596	0.614543	0.645236	0.559794	0.66141	0.668124	0.769777
	19.5918	0.467898	0.578643	0.570805	0.550554	0.554526	0.492687	0.649989	0.625482	0.263349	0.458442	0.528878	0.69974	0.482601	0.571117	0.653944	0.661188	0.685342	0.561956	0.540688	0.388866	0.542776	0.565614	0.652943	0.717174	0.720328	0.352552	0.585687	0.59779	0.338565	0.491545	0.464736	0.545226	0.465905	0.442008	0.467997	0.441045	0.722062	0.448309	0.658889	0.661097	0.660987	0.575313	0.607662	0.637299	0.5517	0.653698	0.661756	0.769169
	20	0.461722	0.573774	0.565311	0.541094	0.548983	0.481852	0.643549	0.615675	0.251619	0.446339	0.529677	0.693397	0.471765	0.565857	0.649998	0.656917	0.676309	0.558511	0.533545	0.39251	0.537476	0.557235	0.644605	0.708944	0.714103	0.354896	0.579035	0.591939	0.33498	0.479593	0.45214	0.535716	0.464201	0.431777	0.460662	0.431423	0.719121	0.44762	0.654753	0.656326	0.655178	0.571939	0.600708	0.629327	0.543543	0.645944	0.655398	0.768615
	20.4082	0.455778	0.568877	0.559862	0.531729	0.543393	0.471147	0.637125	0.605933	0.240368	0.434273	0.530787	0.687134	0.460994	0.560719	0.646042	0.65251	0.667199	0.554132	0.526354	0.397043	0.53174	0.548863	0.636241	0.700682	0.707681	0.356723	0.572444	0.585994	0.332097	0.46778	0.439537	0.525778	0.463019	0.421798	0.453628	0.421998	0.716275	0.447574	0.65084	0.651527	0.64892	0.568488	0.593684	0.621322	0.535332	0.638156	0.649091	0.768113
	20.8163	0.450008	0.563888	0.554437	0.522455	0.537771	0.460565	0.630679	0.596268	0.229567	0.422198	0.532127	0.680944	0.450248	0.555654	0.642024	0.647954	0.658002	0.548787	0.519104	0.40234	0.525524	0.540483	0.627824	0.692378	0.701057	0.35797	0.565894	0.579958	0.329818	0.45612	0.426918	0.51543	0.462297	0.412046	0.446823	0.412758	0.713499	0.448029	0.647124	0.64666	0.64219	0.564879	0.586566	0.613271	0.527049	0.630321	0.64278	0.767623
	21.2245	0.4444	0.55882	0.549022	0.51328	0.532166	0.450137	0.624195	0.586695	0.219223	0.410191	0.533633	0.674825	0.439569	0.550611	0.637943	0.643263	0.648733	0.542547	0.511797	0.408322	0.518856	0.532085	0.619379	0.684037	0.694231	0.358607	0.559375	0.573844	0.328093	0.444628	0.414296	0.504756	0.461996	0.402518	0.440274	0.403699	0.710773	0.448973	0.643622	0.641729	0.634993	0.56113	0.579354	0.605169	0.518706	0.622441	0.636485	0.767131
	21.6327	0.438961	0.553622	0.543577	0.504212	0.526617	0.439872	0.617651	0.577226	0.209331	0.398284	0.535245	0.668772	0.428973	0.545544	0.633777	0.638441	0.639393	0.535401	0.504428	0.414847	0.511701	0.523665	0.610917	0.675683	0.687203	0.358595	0.552866	0.567663	0.326843	0.43332	0.401674	0.493815	0.462056	0.393184	0.433964	0.394809	0.708077	0.450308	0.640332	0.636715	0.627323	0.557192	0.572042	0.59701	0.510298	0.614506	0.630185	0.76661
	22.0408	0.433651	0.548282	0.538071	0.495254	0.521166	0.429785	0.611023	0.567869	0.199885	0.386491	0.536896	0.662783	0.41845	0.54042	0.629503	0.633494	0.629984	0.527417	0.497	0.421824	0.504077	0.51522	0.602435	0.667297	0.679979	0.357915	0.546354	0.561432	0.325994	0.422208	0.389055	0.482675	0.462426	0.384028	0.427863	0.386081	0.705396	0.451959	0.637248	0.631606	0.61919	0.553054	0.564621	0.588798	0.501829	0.606512	0.623862	0.766035
	22.449	0.42853	0.542798	0.532475	0.486435	0.515877	0.419912	0.604314	0.558639	0.190909	0.374929	0.538551	0.656861	0.408076	0.535237	0.625144	0.62845	0.620527	0.518643	0.489524	0.429124	0.495988	0.506766	0.593982	0.658919	0.672568	0.356556	0.53984	0.555169	0.325501	0.411312	0.376468	0.471444	0.463061	0.375043	0.422012	0.377522	0.702727	0.453899	0.634392	0.626409	0.610614	0.54872	0.5571	0.58055	0.493313	0.598465	0.617543	0.765403
	22.8571	0.423565	0.537141	0.526763	0.477767	0.510787	0.41026	0.597505	0.549543	0.182399	0.363579	0.540157	0.651007	0.397826	0.53001	0.620674	0.62331	0.61102	0.509122	0.482007	0.43664	0.48743	0.498313	0.585542	0.650531	0.664983	0.354513	0.533324	0.548894	0.325279	0.400647	0.363919	0.460184	0.463905	0.366217	0.416349	0.369138	0.700071	0.45601	0.631746	0.621103	0.601618	0.54415	0.549469	0.572286	0.484747	0.590364	0.611188	0.764693
	23.2653	0.418814	0.531356	0.520936	0.469288	0.505964	0.400879	0.590613	0.540597	0.174393	0.352582	0.54169	0.645227	0.387787	0.524783	0.616136	0.61811	0.601491	0.498959	0.47447	0.444273	0.478451	0.48989	0.577172	0.642161	0.657244	0.351805	0.526833	0.54263	0.325311	0.390233	0.351454	0.449028	0.464927	0.357572	0.41093	0.360953	0.697445	0.458305	0.629344	0.615709	0.592246	0.539387	0.541743	0.564045	0.476156	0.582228	0.604848	0.763916
	23.6735	0.41428	0.52542	0.514991	0.461024	0.501446	0.391781	0.583634	0.531808	0.166906	0.341948	0.543114	0.639529	0.377968	0.519607	0.611525	0.612861	0.591947	0.48819	0.466927	0.451907	0.46904	0.481524	0.568872	0.633814	0.649371	0.348444	0.520386	0.536398	0.325527	0.380088	0.339095	0.438053	0.466075	0.349109	0.405715	0.352991	0.694862	0.460673	0.627171	0.610212	0.582535	0.534391	0.533917	0.55586	0.467539	0.57407	0.598499	0.763065
	24.0816	0.409968	0.519388	0.508953	0.453006	0.497289	0.383004	0.576581	0.523192	0.15997	0.331763	0.544403	0.633919	0.368414	0.514537	0.606866	0.607592	0.582408	0.476942	0.459405	0.459473	0.459258	0.473244	0.560673	0.625492	0.641386	0.344471	0.51402	0.53022	0.325905	0.37023	0.326888	0.427379	0.467321	0.340861	0.400724	0.345284	0.69234	0.463114	0.625247	0.604627	0.572544	0.529206	0.526004	0.547772	0.458919	0.565914	0.592171	0.762149
	24.4898	0.405916	0.513265	0.502839	0.445267	0.493533	0.374571	0.569464	0.514755	0.153623	0.322094	0.545537	0.628404	0.359185	0.50962	0.602178	0.602326	0.572897	0.465274	0.451925	0.466865	0.449115	0.465085	0.552605	0.617224	0.633312	0.339916	0.507764	0.524117	0.326409	0.360673	0.314867	0.417112	0.46863	0.332843	0.395972	0.337861	0.689892	0.465573	0.623578	0.598959	0.562326	0.523824	0.518013	0.539811	0.450303	0.557782	0.58588	0.76117
	24.898	0.402077	0.507074	0.496674	0.437822	0.49021	0.366495	0.562277	0.506505	0.147883	0.312945	0.546481	0.622988	0.350275	0.504878	0.597452	0.597077	0.563419	0.453292	0.444507	0.474026	0.43865	0.45707	0.544663	0.608994	0.625172	0.334824	0.501641	0.518104	0.326995	0.351429	0.303057	0.407335	0.469968	0.325075	0.391426	0.330742	0.687522	0.467996	0.622153	0.593209	0.55194	0.518258	0.509946	0.532	0.441704	0.549692	0.579616	0.760123
	25.3061	0.398489	0.500846	0.490477	0.430697	0.487358	0.358801	0.555034	0.498448	0.142796	0.304415	0.54722	0.617674	0.341761	0.50032	0.592714	0.591875	0.554002	0.44109	0.437177	0.480876	0.427896	0.44923	0.536892	0.600835	0.616985	0.329239	0.495673	0.512196	0.327653	0.342505	0.291495	0.398166	0.471314	0.317573	0.387143	0.323946	0.68523	0.470389	0.620993	0.587401	0.54145	0.512541	0.501823	0.524358	0.433139	0.541666	0.57342	0.759013
	25.7143	0.395105	0.494563	0.484247	0.423896	0.484982	0.351478	0.547719	0.490581	0.13837	0.29646	0.547719	0.612463	0.333618	0.495928	0.587932	0.586722	0.544644	0.428736	0.429946	0.487355	0.416858	0.441583	0.529274	0.592736	0.608768	0.323193	0.489861	0.506402	0.328325	0.333899	0.28018	0.389661	0.472628	0.310329	0.383068	0.317475	0.682999	0.472658	0.62007	0.581525	0.530907	0.506654	0.493646	0.516884	0.424608	0.533713	0.567259	0.757816
	26.1225	0.391932	0.488259	0.477986	0.417432	0.483103	0.344542	0.540337	0.482906	0.134634	0.289154	0.547961	0.607354	0.325898	0.491675	0.58312	0.581644	0.535367	0.41635	0.422834	0.493414	0.405583	0.434155	0.521843	0.584713	0.600539	0.316732	0.484207	0.500729	0.329006	0.325607	0.269133	0.381922	0.473894	0.303352	0.379252	0.311331	0.680814	0.474828	0.619398	0.575609	0.520379	0.500649	0.485434	0.509582	0.416132	0.525848	0.56117	0.756531
	26.5306	0.388969	0.4819	0.471663	0.41131	0.481711	0.337977	0.532878	0.475416	0.1316	0.282464	0.547926	0.602349	0.318603	0.487529	0.578255	0.576642	0.526172	0.403971	0.415849	0.498983	0.394056	0.426964	0.514595	0.576777	0.59231	0.309878	0.478696	0.495177	0.329645	0.317618	0.258348	0.374995	0.475076	0.296618	0.375671	0.305501	0.678653	0.476817	0.618954	0.569649	0.509915	0.494504	0.477195	0.502441	0.407708	0.518072	0.55513	0.755133
	26.9388	0.386192	0.4755	0.465258	0.405533	0.480797	0.331779	0.52534	0.468104	0.129261	0.276398	0.547593	0.597447	0.311735	0.483464	0.57333	0.571725	0.517067	0.391708	0.409003	0.504035	0.382314	0.420033	0.507535	0.568917	0.584096	0.302665	0.47332	0.489746	0.330224	0.309918	0.247823	0.368938	0.476154	0.290125	0.372326	0.299978	0.676493	0.478623	0.618727	0.563663	0.499578	0.488255	0.468942	0.495459	0.399348	0.510391	0.549147	0.75361
	27.3469	0.383647	0.469043	0.458732	0.400116	0.48034	0.325943	0.517733	0.460965	0.127626	0.270968	0.546961	0.592649	0.305339	0.479471	0.568353	0.566904	0.508065	0.379609	0.402303	0.508505	0.370352	0.413388	0.500686	0.561161	0.575912	0.295118	0.468067	0.484431	0.330724	0.302489	0.237559	0.363803	0.477103	0.283863	0.369247	0.294754	0.674321	0.480217	0.618713	0.557662	0.489423	0.48191	0.460693	0.488634	0.391059	0.502811	0.543235	0.751953
	27.7551	0.381303	0.462522	0.452057	0.395059	0.480301	0.320449	0.510054	0.453988	0.126661	0.266114	0.546015	0.58796	0.299386	0.475556	0.563303	0.562171	0.499163	0.367741	0.395752	0.512371	0.358183	0.407052	0.49403	0.553492	0.567772	0.28726	0.462929	0.479227	0.331111	0.295312	0.227543	0.3596	0.477898	0.27783	0.366393	0.289827	0.672122	0.481552	0.618882	0.551648	0.479505	0.475469	0.452452	0.481966	0.382839	0.495332	0.537373	0.750144
	28.1633	0.379214	0.455955	0.445211	0.390384	0.480651	0.315307	0.502329	0.447172	0.126348	0.261875	0.544764	0.583383	0.293937	0.471751	0.558214	0.557539	0.49038	0.356171	0.389362	0.515593	0.345832	0.401057	0.487602	0.545931	0.559693	0.279125	0.45791	0.474125	0.331394	0.288366	0.217786	0.35637	0.478531	0.272045	0.363817	0.285205	0.669898	0.482658	0.619239	0.545646	0.469887	0.468976	0.444244	0.475467	0.374704	0.487969	0.531605	0.748192
	28.5714	0.37737	0.449323	0.438178	0.386098	0.481328	0.31049	0.494567	0.440507	0.126637	0.258162	0.543204	0.578923	0.288973	0.468093	0.553071	0.552997	0.481716	0.344924	0.383132	0.518144	0.333294	0.395428	0.48138	0.538474	0.551691	0.270734	0.453014	0.469116	0.331541	0.281631	0.208279	0.354088	0.478977	0.26652	0.36148	0.280896	0.667645	0.483467	0.61975	0.539648	0.460617	0.462411	0.436074	0.469143	0.366645	0.480727	0.525907	0.746085
	28.9796	0.375782	0.442668	0.430967	0.38221	0.482289	0.306007	0.486793	0.433996	0.127474	0.254991	0.541342	0.574587	0.284523	0.46463	0.547901	0.54855	0.473185	0.334076	0.377073	0.520021	0.320616	0.390193	0.475384	0.53112	0.543781	0.262133	0.448259	0.46419	0.331566	0.275087	0.199035	0.352763	0.479234	0.261298	0.359413	0.276922	0.665372	0.484025	0.620413	0.533681	0.451755	0.455826	0.427962	0.46301	0.358679	0.473625	0.52032	0.743836
	29.3878	0.374469	0.435978	0.423584	0.378731	0.483466	0.301841	0.479027	0.427633	0.1288	0.252295	0.539183	0.570379	0.280602	0.461402	0.542708	0.54419	0.464792	0.323623	0.371187	0.521201	0.307792	0.385373	0.469608	0.523885	0.535979	0.253348	0.443657	0.459333	0.331453	0.268714	0.190051	0.352355	0.479289	0.256404	0.357615	0.2733	0.66308	0.484294	0.621203	0.527741	0.443344	0.449211	0.41992	0.457073	0.350801	0.466676	0.514845	0.741446
	29.7959	0.373391	0.429282	0.416052	0.375654	0.484799	0.297983	0.471281	0.421419	0.130531	0.250021	0.536721	0.5663	0.27719	0.458434	0.537492	0.539909	0.456543	0.313618	0.36548	0.521708	0.294866	0.380984	0.464038	0.516749	0.528298	0.244422	0.439222	0.454533	0.331195	0.262493	0.18133	0.352818	0.47914	0.25188	0.356065	0.270046	0.660771	0.484285	0.622099	0.52184	0.435427	0.442595	0.411959	0.451335	0.343017	0.459893	0.509491	0.738919
	30.2041	0.372574	0.422587	0.408391	0.372981	0.486226	0.294426	0.463579	0.415354	0.132605	0.248142	0.533967	0.562354	0.274321	0.45574	0.532267	0.535704	0.448448	0.304056	0.359957	0.521535	0.281849	0.377036	0.458686	0.509733	0.520747	0.23539	0.434965	0.449776	0.330796	0.256403	0.172873	0.354108	0.478783	0.247756	0.354803	0.267173	0.658441	0.484013	0.62309	0.515988	0.428037	0.435997	0.4041	0.44579	0.335334	0.453292	0.504286	0.736261
	30.6122	0.371959	0.415885	0.400616	0.370692	0.487672	0.291143	0.455919	0.409435	0.134932	0.246546	0.530908	0.558536	0.271945	0.453305	0.527007	0.531553	0.4405	0.294939	0.354615	0.520716	0.268758	0.373526	0.453513	0.502817	0.513332	0.226281	0.430883	0.445044	0.330226	0.250423	0.164664	0.356132	0.478209	0.244048	0.353776	0.264679	0.656074	0.483444	0.624133	0.510178	0.421191	0.42941	0.396347	0.44042	0.327748	0.446877	0.499206	0.733461
	31.0204	0.371553	0.409194	0.39274	0.368774	0.489082	0.288128	0.448319	0.403663	0.137442	0.245224	0.527552	0.554846	0.270079	0.451107	0.521723	0.527455	0.432708	0.28627	0.349459	0.519269	0.255625	0.370448	0.448531	0.496011	0.506058	0.217131	0.426971	0.440324	0.329491	0.244532	0.1567	0.358834	0.477422	0.240776	0.353024	0.262562	0.653654	0.482625	0.625221	0.504428	0.414906	0.422874	0.388722	0.435205	0.320272	0.440658	0.494289	0.730526
	31.4286	0.371324	0.402476	0.384756	0.367208	0.490379	0.285347	0.440777	0.398033	0.140068	0.244055	0.523893	0.551278	0.268684	0.449107	0.516387	0.523383	0.425061	0.278002	0.34448	0.517222	0.242441	0.367787	0.443704	0.489307	0.498927	0.207954	0.423208	0.435597	0.328557	0.238708	0.148952	0.362104	0.476408	0.237935	0.352508	0.260804	0.651158	0.481509	0.62631	0.498725	0.409173	0.416365	0.381231	0.430114	0.312899	0.434626	0.489503	0.727438
	31.8367	0.371244	0.395744	0.376661	0.365971	0.491511	0.282792	0.433301	0.392545	0.142736	0.243011	0.519934	0.547827	0.267735	0.447273	0.510997	0.519328	0.41756	0.270136	0.33968	0.514617	0.229244	0.365523	0.439023	0.482696	0.491938	0.198778	0.419579	0.430849	0.327419	0.23293	0.141405	0.365866	0.47517	0.235531	0.352227	0.259391	0.648563	0.480135	0.627379	0.493081	0.403985	0.409916	0.373889	0.425119	0.305641	0.428784	0.484866	0.724198
	32.2449	0.371326	0.388961	0.368434	0.36505	0.492414	0.280439	0.425903	0.387195	0.145401	0.24202	0.515684	0.544489	0.267226	0.445578	0.505547	0.515274	0.410201	0.262602	0.335051	0.511474	0.216024	0.363635	0.434477	0.476188	0.485091	0.189611	0.416057	0.426065	0.326058	0.227177	0.134038	0.370022	0.473699	0.233554	0.352185	0.258306	0.645851	0.478484	0.628399	0.487488	0.399315	0.403515	0.36671	0.420193	0.298501	0.423121	0.48037	0.7208
	32.6531	0.371525	0.382121	0.36006	0.36442	0.493032	0.278271	0.418586	0.381982	0.147998	0.241013	0.511147	0.541261	0.2671	0.444006	0.500024	0.511201	0.402975	0.255379	0.330587	0.507848	0.202809	0.362096	0.430035	0.469759	0.478387	0.180468	0.412624	0.421234	0.324455	0.221432	0.12683	0.374472	0.471991	0.232005	0.352337	0.257533	0.643006	0.47656	0.629336	0.481943	0.395133	0.39717	0.359699	0.415313	0.291484	0.41763	0.476002	0.717239
	33.0612	0.371868	0.37522	0.351528	0.364077	0.493322	0.276288	0.411376	0.37691	0.150492	0.239984	0.506344	0.538139	0.267371	0.442563	0.494451	0.507105	0.395886	0.248414	0.326287	0.503761	0.189614	0.360885	0.425707	0.463425	0.471828	0.171363	0.409268	0.416345	0.322615	0.215682	0.119777	0.379148	0.470049	0.230892	0.352715	0.257068	0.640024	0.474395	0.630177	0.476453	0.391402	0.390896	0.352877	0.410466	0.284606	0.412309	0.471786	0.713528
	33.4694	0.372318	0.368237	0.342833	0.364003	0.493227	0.27447	0.404284	0.371979	0.152836	0.238848	0.501283	0.535122	0.267981	0.441263	0.488816	0.502964	0.388924	0.241654	0.322144	0.499265	0.176452	0.359973	0.421455	0.457167	0.465417	0.162306	0.405978	0.411392	0.320512	0.209919	0.112867	0.383943	0.467864	0.230217	0.353264	0.256907	0.636904	0.47196	0.630881	0.471001	0.388077	0.384676	0.346245	0.40564	0.27787	0.407148	0.467693	0.709666
	33.8775	0.372879	0.361199	0.333989	0.364188	0.49272	0.27283	0.397336	0.367196	0.154991	0.237629	0.495986	0.532208	0.268929	0.440131	0.48315	0.498779	0.382096	0.235075	0.318161	0.494404	0.163367	0.359339	0.417291	0.450986	0.459157	0.153322	0.40276	0.406372	0.318162	0.204136	0.106115	0.388803	0.465449	0.230001	0.354002	0.257057	0.633656	0.469317	0.631443	0.465598	0.385115	0.378544	0.339822	0.400836	0.271298	0.402153	0.463755	0.705679
	34.2857	0.373537	0.354089	0.325012	0.36462	0.491757	0.271357	0.390551	0.362568	0.15693	0.236264	0.49047	0.529394	0.270186	0.439193	0.477457	0.494539	0.375397	0.22861	0.314336	0.489218	0.15037	0.358956	0.413189	0.444882	0.453054	0.144423	0.399616	0.401282	0.315547	0.198336	0.0995296	0.393637	0.462799	0.230246	0.354904	0.257519	0.63029	0.466442	0.631831	0.460228	0.382462	0.372479	0.333611	0.396051	0.264898	0.397321	0.459955	0.701575
	34.6939	0.374253	0.34694	0.31594	0.365278	0.490314	0.27006	0.383947	0.358101	0.158607	0.23476	0.484745	0.526679	0.271712	0.438467	0.471751	0.49024	0.368828	0.222257	0.310675	0.483771	0.137519	0.358797	0.409143	0.438837	0.44711	0.135639	0.39656	0.396122	0.312669	0.192522	0.093134	0.398383	0.459925	0.23096	0.355947	0.258299	0.626817	0.463382	0.63203	0.454895	0.380072	0.366509	0.327625	0.391284	0.258692	0.392659	0.456306	0.697379
	35.102	0.375027	0.339752	0.306806	0.366148	0.48837	0.268939	0.377543	0.353806	0.160005	0.233103	0.478835	0.524056	0.273503	0.437957	0.466051	0.485884	0.362394	0.215963	0.307178	0.478099	0.124838	0.358832	0.405151	0.432866	0.44133	0.126992	0.393598	0.390894	0.309529	0.1867	0.0869568	0.40298	0.456833	0.232134	0.357144	0.259397	0.623249	0.460152	0.632026	0.449593	0.37789	0.360633	0.321873	0.386531	0.252696	0.38817	0.452813	0.693111
	35.5102	0.375794	0.332535	0.297651	0.367201	0.4859	0.267988	0.371342	0.349687	0.161086	0.231255	0.472743	0.521518	0.275491	0.43765	0.460349	0.481464	0.356086	0.20972	0.30385	0.47227	0.112374	0.359028	0.401182	0.426943	0.435714	0.118506	0.390735	0.385601	0.306104	0.180881	0.0810192	0.40735	0.453525	0.233743	0.35844	0.2608	0.619588	0.456755	0.631789	0.444313	0.375864	0.354852	0.316358	0.381783	0.246923	0.383854	0.449458	0.688782
	35.9184	0.376553	0.325306	0.288508	0.368415	0.482902	0.267215	0.36536	0.345754	0.161832	0.229248	0.466492	0.519058	0.277674	0.437522	0.454668	0.476992	0.349913	0.203513	0.300696	0.466325	0.100175	0.359352	0.397248	0.421079	0.430264	0.110209	0.387974	0.380248	0.302405	0.175075	0.0753609	0.411452	0.450014	0.235759	0.359858	0.262499	0.615838	0.453243	0.631318	0.439061	0.37394	0.349188	0.311094	0.377026	0.241401	0.379714	0.446261	0.684415
	36.3265	0.377251	0.318046	0.279399	0.369762	0.479359	0.266604	0.359592	0.342007	0.162222	0.227023	0.46009	0.516667	0.279987	0.43753	0.448993	0.472462	0.343862	0.19732	0.297715	0.460317	0.0882722	0.359764	0.393318	0.415262	0.424978	0.102117	0.385304	0.374836	0.298404	0.169292	0.0700027	0.415207	0.446295	0.238129	0.361353	0.264466	0.611992	0.449588	0.63058	0.433818	0.372062	0.343622	0.306079	0.37224	0.236135	0.375742	0.443185	0.680014
	36.7347	0.377868	0.310775	0.270343	0.371213	0.475277	0.266162	0.354046	0.338452	0.162233	0.224617	0.453556	0.514332	0.282403	0.437632	0.44334	0.46789	0.337937	0.19116	0.294908	0.454292	0.0767375	0.360228	0.389398	0.409486	0.419855	0.0942581	0.382716	0.369373	0.294104	0.163543	0.0649855	0.418578	0.442381	0.240811	0.362921	0.266682	0.608046	0.445846	0.629571	0.428593	0.370181	0.338186	0.301325	0.36741	0.231152	0.371936	0.440243	0.675596
	37.1429	0.378392	0.303468	0.261341	0.37275	0.470655	0.265877	0.348723	0.335089	0.161862	0.222004	0.446913	0.512046	0.284888	0.437787	0.437709	0.463279	0.332133	0.185008	0.29227	0.44828	0.0656143	0.360707	0.385477	0.403759	0.414896	0.086642	0.380193	0.363864	0.289493	0.157841	0.0603461	0.421509	0.438268	0.243749	0.364553	0.269122	0.603997	0.442001	0.628273	0.423373	0.36824	0.332861	0.296831	0.362516	0.226461	0.368282	0.437408	0.671168
	37.551	0.378785	0.296134	0.252399	0.374346	0.4655	0.265748	0.343623	0.331918	0.16109	0.219196	0.44018	0.509798	0.28739	0.437963	0.432106	0.458642	0.326444	0.178898	0.289798	0.442326	0.0550087	0.361167	0.381545	0.398059	0.4101	0.079293	0.377721	0.358318	0.284564	0.152197	0.0561292	0.423958	0.433962	0.246898	0.366212	0.271767	0.599841	0.438078	0.626674	0.418158	0.366194	0.327665	0.292601	0.357548	0.222077	0.364772	0.434669	0.666741
	37.9592	0.379072	0.28877	0.243514	0.37599	0.45983	0.265782	0.33876	0.328941	0.159919	0.216227	0.433391	0.50758	0.289909	0.438144	0.426556	0.454001	0.320876	0.172829	0.287481	0.436437	0.0450603	0.361583	0.377618	0.392404	0.405471	0.0722285	0.375289	0.352744	0.279329	0.146626	0.0524006	0.425902	0.429471	0.250221	0.367923	0.274607	0.595587	0.434098	0.624775	0.41295	0.363998	0.322605	0.288641	0.352501	0.218014	0.361397	0.432025	0.662332
	38.3674	0.379215	0.281375	0.234691	0.377663	0.453655	0.265973	0.334133	0.326157	0.158338	0.213086	0.426571	0.505386	0.292387	0.438323	0.421063	0.449366	0.31542	0.166828	0.285311	0.430643	0.0360204	0.361928	0.373677	0.386777	0.401012	0.065472	0.37289	0.347152	0.273778	0.141146	0.0492185	0.427299	0.424793	0.253682	0.369636	0.277635	0.591241	0.430051	0.622559	0.407738	0.361612	0.317677	0.284944	0.347377	0.214277	0.358146	0.429443	0.657951
	38.7755	0.379238	0.273977	0.225945	0.379358	0.447003	0.266338	0.329761	0.323571	0.156348	0.209847	0.419757	0.503208	0.294832	0.438512	0.415667	0.444769	0.310088	0.160934	0.283277	0.424945	0.0283959	0.362188	0.36975	0.381185	0.39673	0.0590589	0.370529	0.341556	0.267936	0.135776	0.0466614	0.428155	0.419947	0.257263	0.371379	0.280855	0.586824	0.425989	0.620042	0.402535	0.359007	0.312912	0.28152	0.342187	0.210879	0.355022	0.426943	0.653625
	39.1837	0.379126	0.266573	0.217293	0.381063	0.439893	0.266874	0.325647	0.321182	0.153948	0.206505	0.41298	0.501043	0.297211	0.438721	0.410376	0.440229	0.304877	0.155166	0.281364	0.41935	0.0230803	0.362347	0.365824	0.375627	0.392633	0.0530239	0.368211	0.335968	0.261802	0.130537	0.0447851	0.428443	0.414933	0.260932	0.373126	0.28427	0.582355	0.42189	0.617212	0.397329	0.356156	0.308298	0.278359	0.336942	0.207816	0.352017	0.424493	0.649365
	39.5918	0.378871	0.259207	0.208771	0.382765	0.432359	0.267597	0.321802	0.318994	0.151131	0.20313	0.406271	0.498882	0.299512	0.438964	0.405223	0.43578	0.299795	0.149594	0.279561	0.41386	0.0212863	0.362395	0.361916	0.370096	0.388728	0.0474277	0.365951	0.330402	0.255399	0.125455	0.0436222	0.428173	0.409769	0.264672	0.374874	0.28789	0.577857	0.417804	0.614085	0.392133	0.353045	0.303873	0.275465	0.331658	0.20509	0.349138	0.422103	0.645201
	40	0.378485	0.251886	0.200409	0.384457	0.424432	0.268509	0.31823	0.317007	0.147907	0.199749	0.399666	0.496721	0.301735	0.439244	0.400227	0.43145	0.294848	0.144243	0.27785	0.40846	0.0232877	0.362326	0.358035	0.364605	0.385024	0.0423308	0.363763	0.324874	0.248742	0.120554	0.0431709	0.427348	0.404467	0.268452	0.376638	0.29172	0.573351	0.413727	0.610665	0.386945	0.34966	0.299637	0.272834	0.326349	0.202694	0.346387	0.419762	0.641146
	40.4082	0.37793	0.244639	0.192249	0.386117	0.416145	0.269609	0.314927	0.31522	0.144266	0.196394	0.39319	0.49455	0.303844	0.439553	0.395397	0.427268	0.290036	0.13918	0.276219	0.403155	0.0278187	0.362128	0.354175	0.359139	0.381526	0.0378231	0.361659	0.319394	0.241838	0.11586	0.0433679	0.42597	0.399037	0.272238	0.378386	0.295761	0.568851	0.409675	0.606957	0.38177	0.346	0.295611	0.270457	0.32102	0.200614	0.343767	0.417455	0.637217
	40.8163	0.377229	0.237489	0.184322	0.387737	0.407542	0.270904	0.311895	0.313634	0.140219	0.193132	0.386878	0.492362	0.305857	0.43987	0.390757	0.423272	0.285369	0.134451	0.274647	0.397919	0.0335069	0.361795	0.350362	0.353712	0.378241	0.0339996	0.359649	0.313977	0.234719	0.111398	0.0441278	0.424069	0.3935	0.275997	0.380153	0.300012	0.564371	0.405675	0.602982	0.376617	0.342062	0.291818	0.268337	0.315678	0.19884	0.341284	0.41519	0.633429
	41.2245	0.376348	0.230436	0.176652	0.389296	0.398656	0.27238	0.309117	0.312242	0.135768	0.189959	0.380753	0.490146	0.307735	0.440158	0.386297	0.419486	0.280841	0.130094	0.273115	0.392748	0.0395326	0.361314	0.346579	0.348317	0.375171	0.0309661	0.357735	0.308634	0.227386	0.10719	0.0453289	0.421648	0.38786	0.279679	0.381907	0.304462	0.559913	0.401703	0.598736	0.371484	0.337849	0.28826	0.266459	0.310317	0.197341	0.338934	0.412931	0.62978
	41.6327	0.375297	0.223506	0.169259	0.390778	0.389539	0.274041	0.306588	0.31104	0.130917	0.186953	0.374848	0.487893	0.309489	0.440377	0.382035	0.415948	0.276462	0.126169	0.271604	0.387617	0.0454983	0.36068	0.342851	0.342955	0.372321	0.0288154	0.355914	0.303377	0.219874	0.103258	0.0468513	0.41875	0.382139	0.283251	0.383671	0.309102	0.555479	0.397801	0.594245	0.366387	0.333369	0.284973	0.264823	0.304936	0.196101	0.336718	0.410688	0.626281
	42.0408	0.374077	0.216684	0.162141	0.392172	0.380229	0.275869	0.304292	0.310018	0.125685	0.184112	0.369192	0.485593	0.311105	0.440484	0.377961	0.412681	0.272226	0.122684	0.270086	0.382505	0.0512167	0.359882	0.339171	0.337635	0.369691	0.0275886	0.354177	0.298219	0.212199	0.0996186	0.0485907	0.415398	0.376343	0.286669	0.385441	0.313917	0.551064	0.393933	0.589512	0.361325	0.328628	0.281949	0.263416	0.299527	0.195088	0.334627	0.408426	0.622919
	42.449	0.372683	0.209989	0.155301	0.393463	0.370776	0.27786	0.302215	0.309167	0.120075	0.181493	0.363812	0.483237	0.312572	0.440441	0.374078	0.409715	0.268134	0.119683	0.26854	0.377395	0.0565728	0.358915	0.33555	0.332345	0.367285	0.0272606	0.352513	0.293172	0.204393	0.0962874	0.0504493	0.411637	0.370489	0.289904	0.387208	0.318895	0.546665	0.390124	0.584558	0.356311	0.323641	0.279221	0.262232	0.294088	0.194273	0.332655	0.40614	0.619695
	42.8571	0.371151	0.203417	0.148723	0.39465	0.361231	0.280008	0.300352	0.308478	0.114115	0.179124	0.358743	0.480818	0.313915	0.440223	0.370392	0.407077	0.264192	0.117166	0.266934	0.37225	0.0615371	0.357779	0.332001	0.327103	0.365106	0.0277127	0.35091	0.288249	0.196498	0.0932771	0.0523664	0.407525	0.364592	0.292934	0.389004	0.324029	0.54228	0.386361	0.579401	0.351352	0.31842	0.27679	0.261261	0.288621	0.193628	0.330795	0.403817	0.616599
	43.2653	0.369469	0.196974	0.142398	0.395721	0.351639	0.282297	0.298686	0.307938	0.107813	0.17702	0.354008	0.47833	0.315111	0.439817	0.366893	0.404784	0.260392	0.115138	0.265244	0.367057	0.0660738	0.356477	0.328519	0.321896	0.363156	0.0287863	0.349359	0.283462	0.188548	0.0905973	0.0542845	0.403107	0.358663	0.29574	0.390799	0.329309	0.537909	0.382632	0.574054	0.346454	0.312987	0.27467	0.26049	0.283131	0.193116	0.329038	0.401433	0.613622
	43.6735	0.367684	0.190683	0.136319	0.396682	0.342058	0.284732	0.297218	0.307541	0.101197	0.175241	0.349642	0.475768	0.316202	0.439226	0.363598	0.402864	0.256747	0.113601	0.26344	0.361776	0.0701892	0.355017	0.325131	0.316737	0.361439	0.0302956	0.347857	0.278829	0.18061	0.0882562	0.0561693	0.398466	0.352728	0.298321	0.392634	0.334736	0.533559	0.378956	0.568551	0.341635	0.307367	0.27288	0.259914	0.277632	0.192714	0.327383	0.398998	0.61076
	44.0816	0.365793	0.184542	0.130477	0.397529	0.332534	0.287295	0.295934	0.307274	0.0942889	0.173766	0.345663	0.473129	0.31718	0.438458	0.360492	0.401322	0.253252	0.112523	0.261495	0.356393	0.0738908	0.353411	0.321826	0.311625	0.359959	0.0320848	0.346403	0.274361	0.172729	0.0862575	0.0579952	0.393658	0.3468	0.300666	0.394488	0.340305	0.529236	0.375299	0.562902	0.336895	0.301589	0.271411	0.259517	0.272138	0.192386	0.325824	0.396484	0.608001
	44.4898	0.363822	0.178592	0.124879	0.398263	0.323126	0.289987	0.29483	0.30713	0.0871095	0.172652	0.342093	0.470411	0.318075	0.437531	0.357591	0.400179	0.249915	0.111903	0.259388	0.350883	0.0771871	0.351676	0.318628	0.306559	0.358719	0.0340192	0.345005	0.270075	0.164985	0.0846036	0.0597339	0.388773	0.340906	0.302778	0.396381	0.346016	0.524952	0.371691	0.557142	0.332254	0.295691	0.270294	0.259292	0.266667	0.192106	0.324367	0.393907	0.605346
	44.898	0.361785	0.172834	0.119525	0.398888	0.313882	0.292792	0.293899	0.307098	0.0796957	0.171872	0.338946	0.467609	0.318909	0.436455	0.354881	0.399434	0.246739	0.111694	0.257092	0.345228	0.0801158	0.349826	0.315533	0.30155	0.35772	0.0360004	0.343668	0.265985	0.157446	0.0832917	0.0613745	0.383883	0.335068	0.304652	0.398321	0.351865	0.520714	0.368101	0.551291	0.327716	0.289711	0.269512	0.259225	0.261233	0.191847	0.323012	0.391251	0.602783
	45.3061	0.359674	0.167299	0.11443	0.399396	0.304854	0.295697	0.293123	0.307169	0.0720712	0.171435	0.336227	0.464723	0.319685	0.435235	0.352356	0.399089	0.243724	0.111874	0.254592	0.339426	0.0826894	0.347876	0.312542	0.296586	0.356962	0.0379563	0.342402	0.262103	0.150196	0.082316	0.0628916	0.379065	0.32931	0.306279	0.400293	0.35784	0.516529	0.364541	0.545371	0.323294	0.283697	0.269083	0.259306	0.255847	0.19158	0.321765	0.388517	0.600308
	45.7143	0.357515	0.161998	0.109597	0.39979	0.296098	0.298688	0.292493	0.307333	0.0642872	0.171329	0.33394	0.461747	0.320443	0.433864	0.350008	0.399142	0.240877	0.112407	0.25187	0.333462	0.0849625	0.345844	0.309666	0.291683	0.356441	0.0398304	0.341212	0.258441	0.143333	0.0816661	0.0642764	0.374405	0.32366	0.307652	0.40233	0.363928	0.5124	0.361005	0.539413	0.319	0.277694	0.268997	0.259525	0.250515	0.191289	0.320631	0.385712	0.59791
	46.1225	0.355284	0.156934	0.105029	0.400058	0.287654	0.301736	0.291984	0.307576	0.0563924	0.171503	0.332074	0.458679	0.321169	0.432323	0.347806	0.399574	0.238191	0.113248	0.248916	0.327354	0.0869679	0.343738	0.306886	0.28683	0.356151	0.0415925	0.340098	0.255011	0.136942	0.0813267	0.0655149	0.369959	0.318139	0.308751	0.404398	0.370103	0.508319	0.357471	0.533427	0.314837	0.271753	0.269245	0.259866	0.245234	0.190946	0.319607	0.382815	0.595573
	46.5306	0.353003	0.152122	0.100723	0.400197	0.279577	0.304826	0.291582	0.307889	0.0484707	0.171955	0.330621	0.455514	0.321901	0.430586	0.345744	0.400375	0.235669	0.11438	0.245718	0.321099	0.0887648	0.341574	0.304216	0.282031	0.356082	0.0432121	0.339057	0.251821	0.131144	0.0812791	0.0665984	0.365811	0.312777	0.309568	0.406525	0.376337	0.50428	0.353955	0.527445	0.310823	0.265923	0.269828	0.260325	0.240003	0.19054	0.318697	0.379845	0.593286
	46.9388	0.350661	0.147543	0.0966612	0.400201	0.271901	0.307924	0.29126	0.308255	0.0406515	0.172601	0.32956	0.452249	0.322632	0.42862	0.343779	0.401512	0.233304	0.115752	0.242267	0.314723	0.0904166	0.339361	0.301633	0.277291	0.356223	0.0446814	0.338075	0.248879	0.126032	0.0814997	0.0675307	0.362007	0.307593	0.310082	0.408688	0.382594	0.500267	0.350414	0.521474	0.306955	0.260253	0.27071	0.260884	0.234812	0.190053	0.317893	0.376774	0.591023
	47.3469	0.348263	0.14321	0.0928227	0.400061	0.264672	0.311008	0.290999	0.308663	0.0331567	0.173427	0.328872	0.448881	0.323374	0.426398	0.341898	0.402961	0.231091	0.117362	0.23856	0.308246	0.0919815	0.33711	0.299142	0.272598	0.356561	0.0459885	0.337139	0.246191	0.121727	0.0819632	0.0683081	0.358605	0.302616	0.31029	0.410887	0.388839	0.496267	0.346867	0.515539	0.303249	0.254794	0.271893	0.261537	0.229656	0.189476	0.317191	0.373615	0.588772
	47.7551	0.345828	0.139104	0.0891725	0.399779	0.257919	0.314053	0.290783	0.309097	0.0264382	0.174354	0.328533	0.445408	0.324143	0.4239	0.340068	0.404685	0.229029	0.11918	0.23459	0.301692	0.0935467	0.334837	0.296733	0.267966	0.357083	0.0471328	0.336228	0.243762	0.118323	0.0826412	0.068948	0.355646	0.297865	0.310186	0.413127	0.395036	0.492264	0.343279	0.509652	0.299703	0.24959	0.27333	0.262272	0.224532	0.188807	0.316583	0.370358	0.586507
	48.1633	0.343344	0.135227	0.085679	0.399347	0.251668	0.31703	0.290592	0.309545	0.021388	0.175342	0.328509	0.44183	0.324927	0.421118	0.338267	0.406645	0.227107	0.121202	0.230356	0.2951	0.0951697	0.332557	0.294391	0.263378	0.357771	0.0481149	0.335328	0.241595	0.115904	0.0835054	0.0694559	0.353152	0.293365	0.309773	0.415374	0.401149	0.488246	0.339647	0.503824	0.296324	0.24469	0.275008	0.263079	0.219441	0.188038	0.316062	0.366997	0.584212
	48.5714	0.340847	0.131583	0.0823044	0.398772	0.245945	0.319925	0.290421	0.309997	0.0194888	0.176349	0.328778	0.43815	0.325758	0.418062	0.336484	0.408805	0.225329	0.123437	0.225856	0.288495	0.0969399	0.330291	0.292123	0.258847	0.358612	0.048931	0.334422	0.239694	0.114534	0.0845281	0.0698499	0.351155	0.289139	0.309064	0.417651	0.407151	0.48421	0.335969	0.498078	0.293118	0.240136	0.276889	0.263954	0.214391	0.187178	0.315625	0.363548	0.581874
	48.9796	0.338324	0.128163	0.079017	0.398053	0.240756	0.322709	0.290252	0.310442	0.0216337	0.177304	0.329299	0.434369	0.326616	0.414748	0.334689	0.411113	0.223682	0.125876	0.221095	0.28193	0.0989146	0.328059	0.289904	0.254363	0.35959	0.0495859	0.333499	0.238058	0.114226	0.0856824	0.0701435	0.349643	0.285208	0.30807	0.419917	0.413011	0.480151	0.332216	0.492415	0.29008	0.235972	0.278936	0.264881	0.20939	0.186225	0.315265	0.359996	0.579477
	49.3878	0.335796	0.124989	0.0757929	0.397193	0.236113	0.325372	0.290084	0.310876	0.0268828	0.178199	0.330043	0.430493	0.327527	0.411204	0.332886	0.413535	0.22217	0.128553	0.216078	0.275435	0.101161	0.325885	0.287744	0.249925	0.360688	0.0500703	0.332556	0.236687	0.114981	0.0869453	0.0703436	0.348621	0.281598	0.306814	0.422182	0.418708	0.476075	0.328414	0.486859	0.287221	0.232238	0.281128	0.26586	0.204452	0.185194	0.314988	0.35637	0.57702
	49.7959	0.333262	0.122052	0.0726109	0.396195	0.232007	0.327889	0.289907	0.311292	0.0337844	0.178958	0.330969	0.426526	0.328481	0.407459	0.33105	0.416017	0.220786	0.131463	0.210814	0.269068	0.103731	0.323792	0.285619	0.245538	0.361889	0.0503851	0.33159	0.235577	0.116733	0.088295	0.070464	0.348054	0.278324	0.305308	0.424424	0.424216	0.471987	0.32453	0.481407	0.284531	0.228967	0.28341	0.266881	0.199588	0.184095	0.314792	0.35266	0.574493
	50.2041	0.330711	0.119371	0.0694645	0.395058	0.22843	0.330244	0.289712	0.311688	0.0414798	0.179575	0.332036	0.422473	0.329477	0.403538	0.32918	0.418521	0.219526	0.134638	0.205319	0.262878	0.106655	0.3218	0.283526	0.241186	0.363174	0.0505199	0.330605	0.234723	0.119411	0.089714	0.0704985	0.347909	0.275411	0.303569	0.426625	0.429513	0.467896	0.320589	0.476074	0.282017	0.226193	0.285768	0.267938	0.194808	0.18294	0.314684	0.348892	0.571903
	50.6123	0.328156	0.116943	0.066345	0.393784	0.225363	0.332418	0.289493	0.312063	0.049535	0.18	0.333205	0.418339	0.330522	0.399459	0.327265	0.420999	0.218388	0.138088	0.199609	0.256914	0.10997	0.319929	0.281455	0.236879	0.364524	0.0504686	0.329602	0.234117	0.122904	0.0911863	0.0704521	0.348138	0.272873	0.301611	0.428787	0.434572	0.463807	0.316578	0.470865	0.27967	0.223934	0.288148	0.26903	0.19012	0.181752	0.314669	0.345072	0.569246
	51.0204	0.325563	0.114765	0.0632535	0.392364	0.222775	0.334385	0.289232	0.312415	0.0577324	0.180198	0.334426	0.414129	0.331586	0.395227	0.325289	0.423405	0.217359	0.141819	0.193707	0.251242	0.113671	0.318192	0.279384	0.232603	0.365915	0.0502255	0.328581	0.233749	0.127096	0.0926977	0.0703131	0.348669	0.270724	0.299436	0.430867	0.439365	0.459724	0.312496	0.465775	0.277488	0.222211	0.290525	0.270146	0.185523	0.180543	0.314748	0.341204	0.566525
	51.4286	0.322946	0.112838	0.0601861	0.390798	0.220639	0.336132	0.288925	0.312748	0.0659441	0.180155	0.335661	0.409846	0.33268	0.390841	0.32325	0.425702	0.216439	0.145853	0.187639	0.245906	0.117769	0.316601	0.277313	0.22836	0.367326	0.0497808	0.32754	0.233609	0.131871	0.0942358	0.0700745	0.349444	0.268974	0.297058	0.432878	0.443861	0.45565	0.308362	0.460815	0.275469	0.221024	0.292863	0.271291	0.181019	0.179341	0.314926	0.337313	0.563744
	51.8367	0.320279	0.111139	0.0571368	0.389078	0.21891	0.33763	0.288552	0.313061	0.0740815	0.179814	0.336861	0.405494	0.333762	0.38629	0.321123	0.42784	0.215612	0.150172	0.181431	0.240976	0.122236	0.315165	0.275214	0.224146	0.36873	0.0491362	0.326469	0.233684	0.137102	0.095787	0.0697281	0.350369	0.267624	0.294474	0.434775	0.448023	0.451581	0.304151	0.455969	0.273599	0.220371	0.295117	0.272454	0.176601	0.178164	0.3152	0.333388	0.5609
	52.2449	0.317566	0.109668	0.0540973	0.387196	0.217552	0.338868	0.288107	0.313356	0.08209	0.179183	0.337985	0.401079	0.334828	0.381567	0.318912	0.429786	0.21487	0.154792	0.175116	0.236491	0.127054	0.313891	0.273087	0.219949	0.370105	0.0482844	0.325359	0.233961	0.14269	0.0973395	0.069259	0.351377	0.266678	0.291699	0.436558	0.451821	0.447518	0.299895	0.451244	0.271879	0.220237	0.297268	0.273639	0.17227	0.17704	0.315569	0.329454	0.557998
	52.6531	0.314809	0.108396	0.0510484	0.385151	0.216514	0.339826	0.287581	0.313638	0.0899111	0.178212	0.338994	0.396604	0.335853	0.376666	0.316599	0.431495	0.214204	0.159685	0.168722	0.232503	0.132192	0.312785	0.270914	0.215777	0.371425	0.0472315	0.324191	0.234428	0.148519	0.09888	0.0686661	0.352375	0.266127	0.288738	0.438206	0.455222	0.443457	0.295568	0.446626	0.270293	0.220594	0.299262	0.274841	0.168025	0.175994	0.316026	0.325504	0.555033
	53.0612	0.311997	0.107318	0.0479747	0.382936	0.215752	0.340494	0.286966	0.31391	0.0975113	0.176907	0.339849	0.392076	0.336805	0.371591	0.314187	0.432934	0.213601	0.164845	0.162288	0.229046	0.137606	0.311852	0.268686	0.211612	0.372669	0.0459775	0.322952	0.235072	0.154511	0.100396	0.0679351	0.353284	0.265964	0.285609	0.439692	0.458198	0.439399	0.291192	0.442113	0.268837	0.221412	0.301085	0.27606	0.16387	0.175051	0.316568	0.321551	0.552013
	53.4694	0.30916	0.10642	0.0448527	0.380556	0.215221	0.340868	0.286268	0.31418	0.104848	0.175256	0.340521	0.387504	0.337682	0.366362	0.311678	0.434072	0.213057	0.170248	0.155845	0.22614	0.143266	0.3111	0.266403	0.207463	0.373815	0.0445281	0.321626	0.235884	0.160576	0.101878	0.0670677	0.354031	0.266171	0.282335	0.441024	0.46073	0.435352	0.286768	0.4377	0.267499	0.222648	0.302693	0.277298	0.159818	0.17424	0.31719	0.317606	0.548938
	53.8775	0.306282	0.105687	0.0416677	0.37801	0.21487	0.340938	0.285481	0.314455	0.111891	0.173248	0.340977	0.382895	0.338442	0.361005	0.309073	0.434874	0.212557	0.175862	0.149434	0.22381	0.149116	0.310534	0.264048	0.203319	0.374845	0.0428918	0.320204	0.236853	0.166649	0.103315	0.0660567	0.354534	0.26673	0.278937	0.442157	0.462802	0.431325	0.282296	0.433374	0.266269	0.224259	0.304061	0.27855	0.155881	0.173581	0.317888	0.313666	0.545817
	54.2857	0.303392	0.105127	0.0384082	0.375306	0.214665	0.340714	0.284618	0.314744	0.118614	0.170917	0.341195	0.378259	0.339093	0.35556	0.306396	0.435323	0.2121	0.181669	0.143092	0.222041	0.155127	0.310161	0.261634	0.199178	0.375742	0.0410728	0.31868	0.237972	0.172671	0.104702	0.0649001	0.354741	0.267621	0.275449	0.44311	0.464408	0.427337	0.277807	0.429142	0.265142	0.226194	0.305168	0.279822	0.152081	0.173104	0.318664	0.309759	0.542663
	54.6939	0.300485	0.104719	0.0350708	0.372447	0.214556	0.340191	0.283682	0.315059	0.124988	0.168244	0.341148	0.373606	0.339601	0.35007	0.303649	0.435387	0.211677	0.187619	0.136862	0.220835	0.161244	0.309985	0.259144	0.195043	0.376491	0.0390882	0.317055	0.239235	0.178587	0.106032	0.0635988	0.35458	0.268813	0.271895	0.443851	0.465542	0.423408	0.273288	0.424986	0.264101	0.228404	0.305981	0.28111	0.148438	0.172826	0.319515	0.305877	0.539484
	55.102	0.297565	0.104478	0.0316664	0.369439	0.214514	0.339377	0.282681	0.315412	0.130997	0.165278	0.340816	0.368946	0.339963	0.344575	0.300861	0.435057	0.211282	0.193693	0.13079	0.220155	0.167428	0.310008	0.256587	0.1909	0.377081	0.0369493	0.315335	0.240638	0.184366	0.107307	0.0621453	0.354012	0.270286	0.268307	0.44438	0.466207	0.419562	0.268782	0.420914	0.263146	0.230842	0.306499	0.282417	0.144975	0.172768	0.320447	0.302048	0.536302
	55.5102	0.294643	0.104388	0.0282092	0.366292	0.214503	0.338277	0.281623	0.315815	0.136616	0.162014	0.340179	0.364289	0.34017	0.339113	0.298043	0.434315	0.210913	0.199838	0.124924	0.219973	0.173636	0.310228	0.253959	0.18676	0.377497	0.0346872	0.313525	0.242178	0.189963	0.108526	0.0605464	0.352987	0.272003	0.264707	0.444694	0.466402	0.415822	0.264285	0.416915	0.262262	0.233455	0.306689	0.283744	0.14171	0.172944	0.321462	0.298272	0.533128
	55.9184	0.2917	0.104447	0.0247314	0.363004	0.214493	0.336892	0.28051	0.31628	0.141835	0.158486	0.339214	0.359642	0.340199	0.333707	0.295214	0.433149	0.210558	0.206019	0.119315	0.220242	0.179817	0.310638	0.251257	0.182608	0.37773	0.0323415	0.311636	0.243854	0.195359	0.109691	0.0587966	0.351467	0.273936	0.261115	0.444773	0.466129	0.412211	0.259827	0.412987	0.261443	0.236203	0.306556	0.285087	0.13866	0.173363	0.322561	0.294559	0.52998
	56.3265	0.288756	0.104648	0.0212684	0.359586	0.214466	0.335236	0.279351	0.316819	0.146637	0.15472	0.33791	0.355014	0.340058	0.328373	0.292392	0.431556	0.210216	0.212196	0.114016	0.22091	0.185938	0.311231	0.248491	0.178453	0.377768	0.029979	0.309674	0.245664	0.200527	0.110806	0.0569087	0.349431	0.276052	0.257549	0.444636	0.465387	0.408747	0.255426	0.409133	0.260684	0.239037	0.306084	0.286452	0.135841	0.174035	0.323748	0.290924	0.526874
	56.7347	0.285791	0.104969	0.017877	0.356036	0.214393	0.333305	0.278145	0.317439	0.151009	0.150721	0.336243	0.350411	0.339714	0.323114	0.289581	0.429525	0.209873	0.218314	0.109081	0.221928	0.191944	0.311989	0.245649	0.174289	0.377604	0.0277042	0.307641	0.24761	0.205447	0.111875	0.0548943	0.346843	0.278312	0.254018	0.444253	0.464173	0.405443	0.251086	0.405339	0.259972	0.241917	0.305269	0.287831	0.133262	0.174958	0.325016	0.287354	0.523816
	57.1429	0.282821	0.105405	0.0146432	0.352359	0.214268	0.331116	0.2769	0.318149	0.154945	0.146541	0.334205	0.345839	0.339178	0.317932	0.286805	0.427061	0.209527	0.224346	0.104561	0.223228	0.197808	0.312899	0.242748	0.170112	0.377229	0.0256655	0.305539	0.249693	0.210107	0.1129	0.0527802	0.343702	0.280684	0.250536	0.443648	0.462487	0.40231	0.246847	0.401615	0.259308	0.244801	0.304116	0.289229	0.130934	0.176133	0.326365	0.283869	0.520819
	57.551	0.279851	0.105924	0.0117258	0.348562	0.214072	0.328675	0.275617	0.318951	0.158429	0.142177	0.331784	0.341305	0.338428	0.312821	0.284062	0.424158	0.209168	0.23023	0.100506	0.224765	0.203487	0.313941	0.23978	0.165933	0.376639	0.0240798	0.30336	0.251917	0.214481	0.113886	0.0506125	0.339988	0.283126	0.247108	0.442805	0.460326	0.399354	0.242695	0.397948	0.258679	0.247647	0.302612	0.290638	0.128864	0.177551	0.327784	0.280449	0.517882
	57.9592	0.276884	0.10652	0.00945016	0.344647	0.213804	0.325998	0.274306	0.31985	0.161462	0.137686	0.328971	0.336813	0.337461	0.307783	0.281372	0.420825	0.208788	0.235941	0.0969599	0.226471	0.208953	0.315099	0.23676	0.161739	0.375831	0.0232011	0.301102	0.254283	0.218569	0.114834	0.0484485	0.335712	0.285603	0.243747	0.441729	0.457694	0.39658	0.238671	0.394346	0.258088	0.250421	0.300777	0.292058	0.127063	0.179203	0.329264	0.277104	0.515012
	58.3674	0.273953	0.10717	0.00838019	0.340629	0.213457	0.323104	0.272977	0.320844	0.164032	0.133087	0.325769	0.332372	0.336284	0.302828	0.278741	0.417067	0.208386	0.241432	0.0939559	0.228297	0.214182	0.316356	0.233695	0.157544	0.374808	0.0232891	0.298755	0.256797	0.222347	0.115748	0.0463838	0.330883	0.288073	0.240463	0.440437	0.454598	0.393992	0.234773	0.390805	0.257524	0.253082	0.298603	0.293486	0.12554	0.181076	0.330796	0.273824	0.512204
	58.7755	0.271053	0.107863	0.00899131	0.336514	0.213031	0.320008	0.271639	0.321931	0.166143	0.128423	0.322172	0.327986	0.334881	0.297969	0.276181	0.412891	0.207952	0.24667	0.0915203	0.230188	0.219145	0.317695	0.230591	0.153342	0.373571	0.0244969	0.296317	0.259462	0.225815	0.116634	0.044527	0.325515	0.290499	0.23727	0.438911	0.451049	0.391598	0.231019	0.387326	0.256987	0.255599	0.296111	0.294913	0.124307	0.183151	0.332367	0.270601	0.509459
	59.1837	0.268219	0.108595	0.0110315	0.332322	0.212535	0.316741	0.270312	0.323108	0.167792	0.123749	0.318193	0.323664	0.333281	0.293233	0.273709	0.408316	0.20749	0.251634	0.0896604	0.23209	0.223838	0.319102	0.22747	0.149141	0.37213	0.0268318	0.293786	0.262281	0.228965	0.117497	0.0430282	0.319649	0.292844	0.234186	0.437188	0.447067	0.389405	0.227434	0.383919	0.256477	0.257939	0.293309	0.296341	0.123373	0.185413	0.33397	0.267442	0.506777
	59.5918	0.26545	0.10935	0.0139071	0.328067	0.211968	0.313318	0.269004	0.324368	0.168983	0.119086	0.313831	0.319412	0.331474	0.288648	0.27133	0.403352	0.206996	0.256286	0.088374	0.233964	0.228236	0.320562	0.224333	0.144946	0.370494	0.0301688	0.291167	0.265257	0.231793	0.118345	0.0420485	0.31331	0.29507	0.231221	0.435251	0.442672	0.38742	0.224014	0.380581	0.255988	0.260076	0.290212	0.297755	0.122747	0.187836	0.335593	0.264326	0.504155
	60	0.262759	0.110137	0.0172102	0.323767	0.211347	0.309769	0.267733	0.325706	0.169729	0.114512	0.3091	0.315237	0.329491	0.284243	0.269068	0.398024	0.20647	0.260624	0.0876399	0.235755	0.23234	0.322061	0.221205	0.140755	0.368677	0.034338	0.288469	0.268392	0.234309	0.119189	0.0417605	0.306555	0.297148	0.228394	0.433133	0.437891	0.385656	0.220801	0.377327	0.255527	0.261988	0.286853	0.299155	0.122437	0.190403	0.337234	0.261269	0.501596
	60.4082	0.260157	0.110941	0.020737	0.319441	0.210679	0.306111	0.266512	0.327111	0.170033	0.110044	0.304008	0.311144	0.327342	0.280043	0.266921	0.39235	0.205916	0.264619	0.0874248	0.237435	0.236136	0.323581	0.218089	0.136584	0.366693	0.0391797	0.285703	0.271684	0.236506	0.120039	0.0423157	0.299428	0.299042	0.22571	0.430835	0.432749	0.384118	0.217784	0.374156	0.255087	0.263656	0.283242	0.30053	0.122442	0.193086	0.338884	0.258252	0.499095
	60.8163	0.257632	0.111767	0.0243737	0.315101	0.20998	0.302367	0.265347	0.328575	0.169917	0.105747	0.298563	0.307138	0.325044	0.276062	0.264902	0.386356	0.20533	0.268274	0.0876847	0.238963	0.239619	0.325105	0.215001	0.132426	0.364558	0.0445609	0.282886	0.27513	0.238405	0.120907	0.043813	0.291988	0.300728	0.223178	0.428369	0.427271	0.382812	0.214998	0.371081	0.254678	0.265068	0.279424	0.301872	0.122759	0.195864	0.340538	0.255279	0.496654
	61.2245	0.255204	0.112604	0.0280575	0.310767	0.209266	0.298557	0.264251	0.330085	0.169392	0.101653	0.292779	0.303222	0.322628	0.272303	0.263012	0.38007	0.204718	0.271581	0.0883648	0.240313	0.24279	0.326614	0.211955	0.128297	0.36229	0.0503858	0.28003	0.278725	0.240005	0.121805	0.0462936	0.284302	0.302178	0.220796	0.425764	0.421482	0.381737	0.212446	0.368107	0.254296	0.26621	0.275418	0.303174	0.123376	0.198713	0.342191	0.252346	0.494265
	61.6327	0.252854	0.11344	0.0317463	0.306448	0.208549	0.294691	0.263221	0.331628	0.168477	0.0977902	0.286662	0.299398	0.320096	0.268757	0.261243	0.373516	0.204074	0.274537	0.0894105	0.241465	0.245636	0.328085	0.20895	0.124198	0.359905	0.056571	0.277148	0.282458	0.241322	0.122743	0.0497211	0.276426	0.30337	0.218556	0.423009	0.415398	0.380887	0.210135	0.365236	0.253945	0.267077	0.271266	0.304422	0.124275	0.201606	0.343834	0.249438	0.491923
	62.0408	0.250599	0.11427	0.0354143	0.302158	0.207852	0.290793	0.262265	0.333189	0.167195	0.0942087	0.28023	0.295666	0.317488	0.265404	0.259595	0.366728	0.203403	0.277158	0.0907605	0.242396	0.24817	0.329495	0.20601	0.120137	0.357423	0.0630574	0.274247	0.286316	0.242368	0.123731	0.0540255	0.268444	0.304284	0.216449	0.420148	0.409039	0.380249	0.208086	0.36248	0.253632	0.26766	0.267006	0.305613	0.125432	0.204524	0.345459	0.246562	0.489619
	62.449	0.24844	0.115066	0.0390508	0.297906	0.207185	0.28687	0.261378	0.33475	0.165563	0.0909064	0.273493	0.292027	0.314805	0.262219	0.258046	0.35973	0.2027	0.279437	0.0923613	0.243105	0.250379	0.330823	0.203127	0.116125	0.354862	0.0697862	0.271331	0.290284	0.243145	0.124775	0.0590978	0.260416	0.304897	0.214457	0.417168	0.402419	0.379804	0.206281	0.359834	0.253351	0.267953	0.262667	0.30673	0.126819	0.20744	0.34705	0.24369	0.487335
	62.8571	0.246383	0.115824	0.0426503	0.2937	0.20657	0.28294	0.260563	0.336293	0.163609	0.0879317	0.26647	0.28848	0.312076	0.259174	0.256591	0.35256	0.201967	0.281408	0.0941584	0.243574	0.25228	0.332047	0.20032	0.112161	0.352243	0.07671	0.268402	0.294343	0.243675	0.125882	0.064834	0.252431	0.305196	0.212568	0.4141	0.395555	0.379531	0.204746	0.357308	0.253115	0.267954	0.2583	0.307769	0.128405	0.210338	0.348598	0.240831	0.48506
	63.2653	0.24445	0.116518	0.0462216	0.289554	0.206019	0.279017	0.25982	0.3378	0.161352	0.0852713	0.259182	0.285023	0.309318	0.256245	0.255207	0.345246	0.201207	0.283073	0.0961051	0.243813	0.253876	0.333151	0.197591	0.108265	0.349587	0.0837847	0.265456	0.29847	0.243954	0.127055	0.0711264	0.244566	0.305162	0.210761	0.410955	0.388462	0.379404	0.203457	0.354898	0.252919	0.267653	0.25393	0.308717	0.130157	0.213194	0.350086	0.237961	0.482771
	63.6735	0.242637	0.117142	0.0497714	0.285473	0.205546	0.275111	0.259146	0.339251	0.158825	0.0829493	0.251647	0.281658	0.306545	0.253416	0.253883	0.337822	0.200416	0.284469	0.0981597	0.243817	0.25518	0.334116	0.194945	0.104434	0.346917	0.0909666	0.262493	0.302642	0.244005	0.128294	0.0778792	0.236903	0.304784	0.209025	0.407734	0.381161	0.379399	0.202427	0.352607	0.252769	0.267051	0.249611	0.309565	0.132047	0.215993	0.351499	0.235076	0.480455
	64.0816	0.240973	0.117684	0.0533133	0.281475	0.205168	0.271242	0.258547	0.340627	0.15605	0.0809595	0.243896	0.278384	0.303792	0.250681	0.252603	0.330324	0.199604	0.285622	0.100284	0.243589	0.256217	0.334934	0.192394	0.100685	0.344257	0.0982229	0.25951	0.306834	0.243831	0.129603	0.0850113	0.229536	0.30405	0.207347	0.404472	0.373675	0.379492	0.201645	0.350438	0.252668	0.266145	0.24537	0.310309	0.134046	0.218719	0.352825	0.232175	0.478092
	64.4898	0.239452	0.118132	0.0568561	0.277565	0.204889	0.267415	0.258017	0.341911	0.15306	0.079287	0.235949	0.275202	0.301063	0.248038	0.251351	0.322782	0.198771	0.286563	0.102448	0.243138	0.256994	0.335591	0.189931	0.0970235	0.34163	0.105515	0.256511	0.311017	0.243448	0.130981	0.0924434	0.222537	0.30295	0.205718	0.401156	0.366029	0.379664	0.201101	0.348385	0.252615	0.264936	0.241253	0.310934	0.136129	0.221356	0.35405	0.22924	0.475667
	64.898	0.238088	0.118494	0.0604049	0.273758	0.204725	0.263645	0.257562	0.343089	0.14989	0.0779362	0.227836	0.272112	0.298401	0.245495	0.250124	0.315239	0.197924	0.287342	0.104622	0.242461	0.257548	0.336081	0.187572	0.0934554	0.339059	0.112817	0.253503	0.315163	0.242876	0.132429	0.100119	0.216003	0.301482	0.204134	0.397823	0.358253	0.379897	0.200805	0.346456	0.252616	0.263431	0.237298	0.311441	0.138278	0.223895	0.355169	0.226286	0.47317
	65.3061	0.236879	0.118753	0.0639627	0.270063	0.204675	0.259934	0.257176	0.344145	0.146569	0.0768599	0.219582	0.269114	0.295812	0.243059	0.248901	0.307725	0.197067	0.287987	0.106785	0.241573	0.257889	0.336394	0.185303	0.0899967	0.336567	0.120097	0.250493	0.319242	0.242124	0.133947	0.107975	0.209995	0.299641	0.202586	0.394464	0.350373	0.380177	0.20073	0.34464	0.252668	0.261635	0.233534	0.311818	0.140471	0.226323	0.356171	0.223295	0.470588
	65.7143	0.235816	0.118919	0.0675229	0.266487	0.204747	0.256286	0.256856	0.345068	0.143139	0.0760598	0.211211	0.266207	0.293326	0.240733	0.247684	0.300282	0.196205	0.288558	0.108915	0.240469	0.258049	0.336521	0.183131	0.0866438	0.334173	0.127328	0.247497	0.323221	0.241222	0.135535	0.11597	0.204589	0.297433	0.201071	0.3911	0.342418	0.38049	0.200895	0.342944	0.252777	0.259564	0.230009	0.312064	0.142693	0.228633	0.357056	0.220283	0.467918
	66.1225	0.234907	0.118979	0.0710825	0.263039	0.204938	0.252703	0.256597	0.345849	0.13963	0.07548	0.20275	0.263391	0.290962	0.238515	0.246454	0.292942	0.195344	0.289086	0.110997	0.239164	0.258046	0.336454	0.181046	0.0834162	0.331895	0.134484	0.244526	0.32707	0.240178	0.137192	0.124057	0.199833	0.294861	0.19958	0.387743	0.334413	0.380823	0.201271	0.341359	0.252937	0.257227	0.226738	0.312175	0.144925	0.230817	0.357818	0.217245	0.46515
	66.5306	0.234129	0.118929	0.0746319	0.259715	0.205245	0.249175	0.256383	0.346481	0.136084	0.0751016	0.194219	0.260663	0.288726	0.23639	0.245207	0.285739	0.194482	0.289623	0.113017	0.237663	0.2579	0.336182	0.179039	0.0803094	0.329748	0.141531	0.241593	0.330755	0.239021	0.138915	0.132195	0.195764	0.291935	0.198104	0.384384	0.326378	0.38116	0.201867	0.33988	0.253152	0.254646	0.223762	0.312148	0.14715	0.232868	0.358456	0.214182	0.462283
	66.9388	0.233493	0.11876	0.078168	0.256518	0.205666	0.245701	0.256209	0.346957	0.132533	0.0748844	0.185646	0.258019	0.286646	0.234336	0.243931	0.278713	0.193628	0.29021	0.114964	0.235972	0.257636	0.335696	0.177106	0.0773354	0.327743	0.148442	0.238708	0.334245	0.237766	0.140702	0.14035	0.192407	0.288667	0.19663	0.381053	0.318333	0.381483	0.202672	0.338506	0.253418	0.251833	0.221092	0.311986	0.149347	0.234784	0.358967	0.211105	0.459311
	67.3469	0.232983	0.118451	0.0816895	0.253441	0.206185	0.242267	0.256054	0.347272	0.129013	0.0747832	0.177051	0.255457	0.284708	0.232322	0.242609	0.271887	0.192777	0.290878	0.116832	0.234108	0.257262	0.334987	0.175226	0.0744975	0.325887	0.155178	0.235876	0.337506	0.236426	0.142545	0.148476	0.189751	0.285069	0.195141	0.377726	0.310291	0.381771	0.203667	0.33722	0.253731	0.248808	0.218747	0.311686	0.151494	0.236557	0.359347	0.208002	0.456226
	67.7551	0.232601	0.118	0.0851995	0.250479	0.206797	0.23887	0.255908	0.347424	0.12556	0.0747828	0.168461	0.252972	0.282932	0.23032	0.241239	0.265298	0.191932	0.291674	0.118612	0.232074	0.256806	0.334048	0.173397	0.0717945	0.324185	0.161707	0.233099	0.340506	0.235024	0.14444	0.156541	0.187789	0.281162	0.193625	0.37443	0.302266	0.382002	0.204862	0.336022	0.254091	0.245588	0.216739	0.311254	0.153571	0.23819	0.359594	0.20489	0.453028
	68.1633	0.232349	0.11738	0.0887097	0.247625	0.207482	0.235496	0.255756	0.347409	0.122199	0.0748261	0.159904	0.25056	0.281305	0.2283	0.239802	0.258968	0.191095	0.29261	0.120303	0.229893	0.256274	0.332874	0.171597	0.069238	0.322639	0.167992	0.230374	0.343216	0.233564	0.146376	0.164498	0.186471	0.276957	0.192066	0.371151	0.294269	0.382153	0.20622	0.334892	0.254487	0.24219	0.215058	0.310692	0.155557	0.239677	0.359699	0.201757	0.449705
	68.5714	0.232214	0.116588	0.0922299	0.244867	0.208228	0.232138	0.255583	0.347227	0.118966	0.0749137	0.151404	0.24822	0.279826	0.226243	0.238298	0.252923	0.190264	0.293721	0.121901	0.227566	0.255689	0.331465	0.169819	0.0668172	0.321248	0.173997	0.227697	0.345607	0.232069	0.148344	0.172313	0.185752	0.272479	0.190455	0.36789	0.286315	0.382203	0.207755	0.333827	0.254919	0.238633	0.213714	0.310007	0.157436	0.24102	0.35966	0.198614	0.44626
	68.9796	0.232208	0.11561	0.0957778	0.242204	0.209015	0.228791	0.255382	0.346877	0.11588	0.0750037	0.142993	0.245948	0.278496	0.224142	0.236718	0.247184	0.189443	0.295013	0.123403	0.22511	0.255065	0.329823	0.168052	0.0645442	0.320009	0.179694	0.225063	0.347654	0.230543	0.150336	0.179945	0.185562	0.267745	0.188786	0.364655	0.278421	0.382134	0.209434	0.332813	0.255376	0.234936	0.212677	0.309208	0.159193	0.24222	0.359473	0.195462	0.442686
	69.3878	0.232308	0.114441	0.0993639	0.239623	0.209822	0.225443	0.255141	0.34636	0.112971	0.0750948	0.134697	0.243744	0.277292	0.221999	0.235064	0.241767	0.188632	0.296498	0.124807	0.222534	0.254411	0.327952	0.166279	0.0624083	0.318915	0.185051	0.222468	0.349332	0.229003	0.152341	0.187358	0.185821	0.26278	0.187058	0.361425	0.270604	0.381935	0.211258	0.331839	0.255853	0.231121	0.211944	0.308301	0.160823	0.243277	0.359134	0.1923	0.438987
	69.7959	0.232514	0.113084	0.102999	0.237123	0.210632	0.222094	0.254856	0.345682	0.110256	0.0751807	0.126547	0.241607	0.276227	0.219829	0.233345	0.236689	0.187836	0.298179	0.12611	0.219837	0.253749	0.32586	0.164499	0.0604125	0.317958	0.190049	0.21991	0.350621	0.227463	0.154353	0.194526	0.186457	0.257607	0.18528	0.358221	0.262885	0.381601	0.213217	0.330901	0.256343	0.227211	0.211482	0.307301	0.162323	0.244196	0.358647	0.189149	0.435167
	70.2041	0.232805	0.111531	0.106685	0.234696	0.211417	0.21873	0.254518	0.344846	0.107752	0.0752481	0.118568	0.239535	0.275274	0.217651	0.231561	0.231957	0.187056	0.300042	0.127309	0.217034	0.253078	0.323554	0.162689	0.0585538	0.31713	0.194662	0.21739	0.351504	0.225933	0.156365	0.201417	0.187374	0.252251	0.183457	0.355015	0.255286	0.381127	0.21529	0.329983	0.256833	0.223232	0.211266	0.306216	0.163694	0.244977	0.358011	0.186001	0.431234
	70.6122	0.233158	0.109796	0.110417	0.232337	0.212162	0.215348	0.254122	0.34386	0.105476	0.0753235	0.110785	0.237528	0.274439	0.215483	0.229734	0.227582	0.186293	0.302084	0.128398	0.214117	0.252418	0.321043	0.160853	0.0568222	0.316416	0.198875	0.214917	0.351967	0.224435	0.158374	0.208018	0.188499	0.246746	0.181605	0.351822	0.24783	0.38052	0.217489	0.329085	0.257322	0.219214	0.21127	0.305062	0.164942	0.245627	0.357236	0.182882	0.427204
	71.0204	0.23356	0.10787	0.114187	0.230043	0.212841	0.211937	0.25366	0.342731	0.103433	0.0753886	0.103225	0.235586	0.273705	0.21334	0.227866	0.223561	0.185551	0.30427	0.129373	0.211096	0.251761	0.318333	0.158972	0.0552229	0.315801	0.202671	0.212494	0.351997	0.222975	0.160375	0.214306	0.189743	0.241117	0.179734	0.348627	0.240535	0.379783	0.219784	0.328193	0.257794	0.215184	0.211452	0.303852	0.166071	0.246146	0.356329	0.179791	0.423088
	71.4286	0.233969	0.105762	0.117975	0.227803	0.213432	0.208488	0.253123	0.341471	0.101636	0.0754783	0.095906	0.233705	0.273063	0.211226	0.225979	0.219895	0.184826	0.306587	0.130227	0.207966	0.251112	0.315431	0.157041	0.0537383	0.315269	0.206029	0.210132	0.351587	0.221574	0.162369	0.220273	0.191032	0.235401	0.177858	0.345425	0.233418	0.378923	0.222191	0.327305	0.258244	0.211176	0.211794	0.302601	0.167089	0.246542	0.355299	0.176743	0.418906
	71.8367	0.234377	0.103469	0.121764	0.225613	0.213916	0.204995	0.252504	0.340087	0.10008	0.0755869	0.088855	0.231883	0.27251	0.209137	0.224081	0.216578	0.184122	0.308989	0.130955	0.204732	0.250466	0.312345	0.155055	0.0523748	0.314799	0.208934	0.207836	0.35073	0.220237	0.164354	0.225907	0.192294	0.229629	0.175983	0.342222	0.226494	0.377944	0.224688	0.326412	0.258662	0.207216	0.212246	0.301327	0.168	0.246814	0.354159	0.17375	0.414673
	72.2449	0.234746	0.100983	0.125533	0.223459	0.214267	0.201444	0.251789	0.338591	0.0987703	0.075733	0.0820895	0.230117	0.272016	0.207059	0.222181	0.213596	0.183432	0.311441	0.131553	0.2014	0.249807	0.30908	0.152999	0.051118	0.31437	0.211365	0.205612	0.349423	0.218976	0.166329	0.231195	0.193456	0.223836	0.174116	0.338991	0.21977	0.376848	0.227273	0.325504	0.259037	0.203335	0.212788	0.300042	0.168806	0.246967	0.352916	0.170811	0.410408
	72.6531	0.235063	0.0983095	0.129266	0.221333	0.214472	0.197836	0.250971	0.336992	0.0976998	0.0759361	0.075635	0.228405	0.271587	0.204976	0.220295	0.210938	0.182755	0.313898	0.132013	0.197967	0.249132	0.305644	0.15088	0.0499681	0.313959	0.213303	0.203462	0.347669	0.217801	0.168296	0.236134	0.194466	0.218058	0.172262	0.335751	0.213254	0.375635	0.229942	0.324581	0.259362	0.199559	0.213381	0.298766	0.169509	0.247005	0.351582	0.167945	0.406128
	73.0612	0.235307	0.0954329	0.13295	0.219223	0.214506	0.194163	0.250039	0.335296	0.0968598	0.0761933	0.0695139	0.226742	0.271189	0.202869	0.218422	0.208578	0.182089	0.316305	0.132336	0.194451	0.248415	0.302048	0.148684	0.0489221	0.313544	0.214729	0.20138	0.34547	0.216706	0.170252	0.240707	0.195259	0.212324	0.170424	0.332473	0.206948	0.374303	0.232671	0.323625	0.259624	0.19591	0.213994	0.297512	0.170108	0.246928	0.350162	0.165141	0.401843
	73.4694	0.235456	0.0923633	0.136578	0.217119	0.214354	0.190427	0.248986	0.333512	0.0962469	0.0765449	0.0637498	0.225127	0.27082	0.20073	0.21658	0.2065	0.181428	0.318622	0.132515	0.190848	0.24765	0.298302	0.146422	0.0479721	0.313103	0.215626	0.199365	0.342834	0.215706	0.172199	0.244913	0.195797	0.206672	0.168612	0.329164	0.200857	0.372852	0.235468	0.322639	0.259818	0.192412	0.214602	0.296297	0.170607	0.246742	0.348666	0.162418	0.397574
	73.8776	0.235508	0.089094	0.140149	0.215015	0.214	0.186632	0.247809	0.331645	0.0958456	0.0769838	0.058371	0.223556	0.27046	0.198559	0.214768	0.204674	0.180773	0.320784	0.132552	0.187172	0.246813	0.294422	0.144091	0.0471274	0.312615	0.215985	0.197405	0.339774	0.214791	0.174136	0.248742	0.196034	0.201126	0.166833	0.325816	0.194983	0.37128	0.238298	0.321611	0.259931	0.189081	0.215165	0.295136	0.171009	0.246445	0.347099	0.159769	0.39333
	74.2857	0.23543	0.0856353	0.14366	0.212901	0.213426	0.18278	0.246502	0.329698	0.0956543	0.0775515	0.0533992	0.222031	0.270093	0.196368	0.213	0.203074	0.180118	0.322751	0.132443	0.18343	0.245892	0.290422	0.1417	0.0463773	0.312059	0.215795	0.195494	0.336305	0.21397	0.176064	0.252192	0.195938	0.195718	0.165104	0.322415	0.18933	0.369592	0.241166	0.320538	0.259956	0.185936	0.215672	0.29404	0.171321	0.246043	0.345467	0.1572	0.389129
	74.6939	0.235226	0.082	0.147116	0.21078	0.212625	0.178886	0.245071	0.327676	0.0956613	0.0782596	0.0488632	0.220549	0.269722	0.19418	0.211283	0.201674	0.179467	0.324464	0.132189	0.179623	0.244873	0.286321	0.139263	0.0457369	0.311417	0.215058	0.193625	0.332448	0.21324	0.177986	0.255266	0.19549	0.190473	0.163444	0.318976	0.183905	0.367796	0.244048	0.31942	0.259887	0.182989	0.216085	0.293027	0.171555	0.245536	0.34378	0.154723	0.384985
	75.102	0.234867	0.0781965	0.150515	0.208646	0.211579	0.174954	0.243513	0.325581	0.0958653	0.0791317	0.044782	0.219111	0.269325	0.19202	0.209624	0.200439	0.178817	0.32588	0.131788	0.175766	0.243736	0.282135	0.136783	0.045202	0.310675	0.213772	0.191795	0.328224	0.2126	0.179906	0.257968	0.194662	0.185414	0.161878	0.31547	0.178714	0.365903	0.24693	0.318247	0.259713	0.180252	0.216392	0.292101	0.171724	0.244927	0.342044	0.152329	0.380914
	75.5102	0.234342	0.0742535	0.153855	0.206504	0.210285	0.171002	0.241834	0.323416	0.0962661	0.0802041	0.0411754	0.217717	0.268916	0.18992	0.208041	0.199347	0.178168	0.326959	0.131239	0.171855	0.242479	0.277881	0.134286	0.0447849	0.309817	0.211946	0.190004	0.323661	0.212059	0.181829	0.260318	0.193455	0.180565	0.160432	0.31192	0.173766	0.36393	0.24981	0.317029	0.259434	0.177734	0.216574	0.291278	0.171845	0.244221	0.340273	0.150041	0.376938
	75.9184	0.233636	0.0701799	0.157128	0.204355	0.208732	0.167037	0.240034	0.321183	0.0968627	0.0814786	0.0380539	0.216367	0.268481	0.187903	0.206532	0.198363	0.177521	0.327653	0.130542	0.167906	0.241078	0.273575	0.131777	0.0444937	0.308832	0.209587	0.188253	0.31879	0.211609	0.183762	0.262326	0.19185	0.175942	0.159126	0.308308	0.169065	0.361892	0.252658	0.315756	0.259037	0.17544	0.216612	0.290562	0.171933	0.243416	0.338478	0.147849	0.373071
	76.3265	0.232727	0.0660069	0.160319	0.202198	0.206915	0.163073	0.238116	0.318883	0.097667	0.0829998	0.0354166	0.215059	0.268033	0.185982	0.205112	0.197466	0.176873	0.327941	0.129694	0.163921	0.239531	0.269228	0.129283	0.0443328	0.307708	0.206702	0.18655	0.313641	0.211257	0.185713	0.26402	0.189854	0.171564	0.157985	0.30464	0.164614	0.359806	0.255482	0.314436	0.258524	0.173374	0.216506	0.289958	0.172006	0.242518	0.336673	0.14577	0.369336
	76.7347	0.231617	0.0617503	0.163416	0.20004	0.204832	0.159128	0.236081	0.316518	0.0986808	0.0847601	0.0332537	0.213793	0.267574	0.184164	0.203777	0.196625	0.176225	0.32778	0.128697	0.159913	0.237821	0.264854	0.126818	0.0443214	0.306435	0.203302	0.1849	0.308251	0.210997	0.187691	0.265424	0.187465	0.167441	0.15702	0.300923	0.160414	0.357687	0.258251	0.313067	0.257886	0.17153	0.216235	0.289471	0.172075	0.241528	0.334872	0.143803	0.365746
	77.1429	0.230283	0.0574341	0.166402	0.197875	0.202477	0.15521	0.233924	0.314087	0.0999202	0.0867861	0.0315327	0.212565	0.267102	0.18244	0.20253	0.195817	0.175571	0.327157	0.127551	0.155901	0.235939	0.26046	0.124403	0.0444573	0.305005	0.199391	0.183312	0.302657	0.210826	0.189701	0.266562	0.184684	0.163584	0.15624	0.297141	0.15646	0.355544	0.260967	0.311648	0.257124	0.169904	0.215811	0.289099	0.172151	0.240449	0.333087	0.141945	0.362318
	77.551	0.228739	0.0530881	0.169265	0.195708	0.199856	0.151343	0.231648	0.311592	0.101393	0.089078	0.0302135	0.211374	0.266637	0.1808	0.201366	0.195022	0.174912	0.326046	0.126256	0.151895	0.233877	0.256058	0.122065	0.0447617	0.30341	0.194982	0.181789	0.296898	0.210742	0.191751	0.267465	0.181526	0.159998	0.155651	0.293322	0.152746	0.353384	0.263609	0.310183	0.256234	0.16848	0.215219	0.288845	0.172238	0.239283	0.331332	0.140207	0.359062
	77.9592	0.22698	0.0487347	0.171997	0.193533	0.196965	0.14754	0.229247	0.309029	0.103111	0.0916299	0.0292341	0.210218	0.266165	0.179229	0.20027	0.194214	0.174242	0.324434	0.124821	0.147925	0.23162	0.251655	0.119816	0.0452316	0.301645	0.190081	0.180331	0.291014	0.210731	0.193845	0.268153	0.177989	0.156683	0.155248	0.28944	0.149259	0.351207	0.266158	0.308665	0.255213	0.167241	0.214468	0.288698	0.17234	0.238034	0.329614	0.138571	0.355984
	78.3674	0.225019	0.0444249	0.174599	0.191351	0.193812	0.143826	0.226723	0.306397	0.105087	0.0944556	0.0285298	0.209095	0.265707	0.177718	0.199238	0.193379	0.173558	0.32232	0.123246	0.144002	0.229174	0.247261	0.117694	0.0458789	0.299706	0.1847	0.178939	0.285049	0.210791	0.195987	0.268656	0.174098	0.153637	0.155034	0.285521	0.145991	0.349013	0.268609	0.307102	0.254065	0.166165	0.213559	0.288659	0.172456	0.236707	0.327941	0.13705	0.35309
	78.7755	0.222879	0.0402015	0.177078	0.189164	0.190402	0.140222	0.224077	0.303692	0.107325	0.097526	0.0280289	0.208003	0.265255	0.176267	0.198246	0.192491	0.172861	0.31969	0.121543	0.140158	0.226526	0.242884	0.115711	0.0467051	0.297591	0.178857	0.177606	0.279047	0.210905	0.198176	0.268995	0.169863	0.150848	0.155005	0.281557	0.142927	0.346798	0.270926	0.305488	0.252782	0.165226	0.21249	0.288716	0.172586	0.235303	0.326317	0.135626	0.350375
	79.1837	0.220569	0.0361477	0.179448	0.18697	0.18674	0.136752	0.22131	0.300908	0.109837	0.100857	0.027663	0.206942	0.264819	0.174883	0.197287	0.191542	0.172144	0.316562	0.119717	0.136411	0.223687	0.238535	0.113901	0.0477066	0.295302	0.172569	0.176326	0.273052	0.211069	0.200411	0.269196	0.165308	0.148309	0.155165	0.277552	0.14006	0.344562	0.273109	0.303826	0.251373	0.164397	0.211275	0.288859	0.172731	0.233831	0.324746	0.134299	0.347842
	79.5918	0.218128	0.0323604	0.181731	0.184777	0.182841	0.133446	0.218433	0.298042	0.112623	0.104422	0.0273734	0.205911	0.264408	0.173586	0.196339	0.190512	0.171413	0.312937	0.11778	0.132779	0.220662	0.234223	0.112285	0.0488892	0.292843	0.165864	0.175092	0.26711	0.21127	0.202692	0.269284	0.160464	0.145999	0.155516	0.273524	0.137382	0.342304	0.275124	0.302119	0.249834	0.163644	0.209907	0.289078	0.172888	0.232296	0.32323	0.133069	0.345482
	80	0.215566	0.0289799	0.183951	0.182589	0.17871	0.130323	0.215446	0.295089	0.115688	0.108221	0.0271048	0.204913	0.264018	0.1724	0.195391	0.189389	0.170665	0.308845	0.115741	0.129289	0.217462	0.229958	0.110883	0.0502364	0.290218	0.158771	0.173898	0.261265	0.2115	0.205013	0.269283	0.155356	0.143903	0.15606	0.269458	0.134889	0.340025	0.27696	0.300367	0.24817	0.162942	0.208403	0.289357	0.173063	0.230705	0.321769	0.13192	0.343291
	80.4082	0.212925	0.0261893	0.186132	0.180416	0.174367	0.127414	0.212364	0.292045	0.119034	0.112244	0.0268195	0.203946	0.263674	0.171351	0.194433	0.188167	0.169902	0.304309	0.113609	0.125949	0.21411	0.225746	0.109722	0.0517526	0.287438	0.151323	0.172741	0.255563	0.211754	0.207373	0.269224	0.150031	0.141997	0.156803	0.265388	0.132583	0.337731	0.278603	0.298579	0.246386	0.16226	0.206764	0.289687	0.173257	0.229069	0.320366	0.130867	0.341264
	80.8163	0.210225	0.024192	0.188297	0.178266	0.169822	0.124733	0.209189	0.288908	0.122653	0.116469	0.0264815	0.203012	0.263369	0.170462	0.193446	0.186831	0.169126	0.299366	0.111395	0.122785	0.210619	0.221593	0.10881	0.0534175	0.284512	0.143557	0.171621	0.250044	0.212019	0.209766	0.269132	0.144518	0.14026	0.157739	0.261298	0.13046	0.335428	0.280027	0.296752	0.244481	0.16157	0.205	0.290046	0.173475	0.227394	0.319021	0.129888	0.339392
	81.2245	0.207496	0.0231906	0.190464	0.176148	0.165096	0.122301	0.20593	0.285677	0.126548	0.120901	0.0260688	0.202109	0.26313	0.169746	0.192429	0.185382	0.168336	0.294067	0.109107	0.119809	0.207023	0.217503	0.108167	0.0552268	0.28145	0.135505	0.17054	0.244748	0.212297	0.212188	0.269038	0.138872	0.138672	0.158864	0.257213	0.128524	0.333122	0.281236	0.294897	0.242468	0.160848	0.203124	0.290424	0.173721	0.225696	0.317739	0.128996	0.337673
	81.6326	0.204779	0.0232717	0.192647	0.174073	0.160208	0.120132	0.202593	0.282353	0.130702	0.1255	0.0255628	0.201238	0.262956	0.169207	0.191363	0.183809	0.167537	0.288457	0.106754	0.117037	0.20334	0.213478	0.107792	0.0571654	0.278265	0.12721	0.169503	0.23971	0.212573	0.214634	0.268967	0.133138	0.137207	0.160161	0.253139	0.126771	0.330815	0.282198	0.293013	0.240345	0.160067	0.20114	0.290802	0.173997	0.223982	0.316521	0.128178	0.336094
	82.0408	0.202095	0.0243911	0.194856	0.172043	0.155175	0.11823	0.199177	0.278937	0.135109	0.130266	0.0249495	0.200397	0.262858	0.168836	0.190245	0.182116	0.166723	0.282608	0.104345	0.114491	0.199605	0.209515	0.107691	0.0592165	0.274968	0.118704	0.168517	0.23496	0.212844	0.217096	0.268944	0.127368	0.13585	0.161612	0.249076	0.125198	0.32851	0.28292	0.291107	0.238125	0.159207	0.199072	0.291162	0.174302	0.222269	0.315371	0.127427	0.334651
	82.449	0.199499	0.0263545	0.197101	0.17007	0.150027	0.116604	0.19569	0.275434	0.13975	0.135161	0.0242229	0.199584	0.262849	0.168616	0.189059	0.180298	0.165897	0.276578	0.101889	0.112177	0.195845	0.205614	0.107857	0.0613737	0.271572	0.110028	0.167584	0.230523	0.2131	0.219566	0.268992	0.121625	0.134577	0.163191	0.245053	0.1238	0.3262	0.283381	0.289182	0.235811	0.158243	0.196919	0.29149	0.174632	0.220567	0.31429	0.126746	0.333329
	82.8572	0.197017	0.0289415	0.199386	0.168154	0.144781	0.115247	0.192127	0.271847	0.144607	0.140161	0.0233743	0.198796	0.262919	0.168525	0.187794	0.178354	0.165055	0.27045	0.0993943	0.110117	0.192089	0.20177	0.108277	0.0636113	0.268088	0.101223	0.166709	0.226418	0.21333	0.222033	0.26912	0.115964	0.133376	0.164869	0.241054	0.122564	0.323877	0.283571	0.287234	0.23341	0.157157	0.194705	0.291767	0.174981	0.218891	0.313277	0.126108	0.332117
	83.2653	0.194704	0.0319352	0.201723	0.166299	0.139471	0.114158	0.188496	0.268183	0.14966	0.145247	0.0224055	0.198032	0.263084	0.168544	0.186439	0.17629	0.164195	0.264303	0.0968702	0.108312	0.188377	0.197981	0.108943	0.0659265	0.26453	0.0923377	0.165889	0.222656	0.213529	0.224485	0.269344	0.110465	0.132227	0.166625	0.237112	0.12148	0.321529	0.283489	0.285273	0.230934	0.155927	0.192436	0.29198	0.17534	0.217256	0.312331	0.125522	0.330999
	83.6735	0.192597	0.0351725	0.204121	0.164512	0.134121	0.113322	0.184795	0.264444	0.154881	0.150371	0.0213147	0.197288	0.263323	0.168654	0.184976	0.174101	0.163317	0.25822	0.0943285	0.106765	0.184731	0.194247	0.109827	0.0682945	0.260909	0.0834313	0.165119	0.219242	0.213678	0.226908	0.26966	0.105194	0.131119	0.168431	0.233217	0.120536	0.319141	0.283107	0.283292	0.228384	0.154535	0.190122	0.292108	0.175698	0.215674	0.311445	0.124961	0.329956
	84.0816	0.190739	0.0385291	0.206594	0.162793	0.128762	0.112727	0.181032	0.26064	0.16025	0.155528	0.0201078	0.196563	0.263642	0.168849	0.183402	0.171795	0.162417	0.252301	0.0917768	0.105475	0.181198	0.190565	0.110917	0.0707076	0.25724	0.0745742	0.164391	0.216175	0.213777	0.229284	0.270072	0.10024	0.13004	0.170272	0.229383	0.119722	0.316701	0.282436	0.281297	0.225775	0.152965	0.187779	0.292143	0.176046	0.214161	0.310614	0.124424	0.328972
	84.4898	0.189175	0.0419064	0.209162	0.161154	0.123433	0.112357	0.177216	0.256774	0.165735	0.160671	0.0187923	0.195857	0.264027	0.16913	0.181702	0.169369	0.161499	0.246629	0.0892263	0.104422	0.177803	0.186939	0.11218	0.0731512	0.253537	0.0658677	0.163692	0.213446	0.213812	0.231597	0.270571	0.0956883	0.128976	0.172131	0.225627	0.119029	0.314194	0.281447	0.279288	0.22311	0.1512	0.185405	0.292066	0.176377	0.212728	0.309827	0.1239	0.328023
	84.898	0.187928	0.045242	0.21184	0.159598	0.118162	0.112188	0.17335	0.252854	0.171315	0.165791	0.0173757	0.195167	0.264465	0.169503	0.179876	0.16683	0.16056	0.241312	0.086685	0.103599	0.174589	0.183369	0.113599	0.0756078	0.249814	0.0574408	0.163012	0.21104	0.213779	0.233829	0.271146	0.0916253	0.12792	0.173998	0.221936	0.11845	0.311614	0.280148	0.277266	0.220401	0.149232	0.183019	0.291865	0.176686	0.211392	0.309076	0.123375	0.327094
	85.3061	0.187038	0.0484711	0.214648	0.158138	0.112996	0.112201	0.169452	0.24889	0.176963	0.170862	0.0158725	0.194493	0.264955	0.169981	0.17792	0.164181	0.159603	0.236433	0.0841597	0.102977	0.171589	0.179861	0.115146	0.0780747	0.246086	0.0494884	0.162338	0.208938	0.213675	0.235964	0.271788	0.0881439	0.126862	0.175863	0.218345	0.117984	0.308956	0.278528	0.275236	0.217658	0.147051	0.180617	0.291532	0.176973	0.210163	0.308351	0.122857	0.326165
	85.7143	0.186507	0.0515617	0.217595	0.156782	0.107968	0.112365	0.165526	0.244888	0.182652	0.175855	0.0142912	0.193833	0.265473	0.170573	0.175837	0.161424	0.158629	0.23209	0.0816577	0.10254	0.168832	0.176418	0.116794	0.0805291	0.242366	0.0422979	0.161661	0.207112	0.213491	0.237985	0.272481	0.0853109	0.125795	0.177714	0.214836	0.117623	0.306217	0.276584	0.273194	0.214886	0.144654	0.178212	0.29105	0.177238	0.209053	0.307641	0.122323	0.325222
	86.1225	0.186353	0.0544745	0.220689	0.155541	0.103127	0.112659	0.161585	0.24086	0.188364	0.180767	0.0126467	0.193187	0.266024	0.171283	0.173635	0.15857	0.157639	0.228363	0.0791806	0.102264	0.166353	0.173046	0.118526	0.0829727	0.23867	0.036308	0.160974	0.205532	0.213234	0.239878	0.273218	0.0831957	0.124714	0.17954	0.211437	0.117366	0.303401	0.27433	0.271152	0.212101	0.142043	0.175809	0.290416	0.177488	0.208073	0.306942	0.121784	0.324254
	86.5306	0.186567	0.0571904	0.223927	0.154424	0.0985164	0.113048	0.157636	0.236818	0.194068	0.185556	0.0109497	0.192551	0.266586	0.172106	0.171316	0.155619	0.156634	0.22532	0.0767328	0.102122	0.164167	0.169751	0.12031	0.0853874	0.235008	0.0321362	0.160272	0.204166	0.212895	0.241629	0.273979	0.0818221	0.123612	0.181323	0.208147	0.117206	0.300507	0.271752	0.269103	0.209306	0.139217	0.173408	0.289617	0.177727	0.207229	0.306243	0.121227	0.323247
	86.9388	0.187137	0.0596945	0.227296	0.153437	0.0941812	0.113505	0.153682	0.232774	0.199747	0.190219	0.0092117	0.191924	0.267155	0.173026	0.168897	0.152582	0.155611	0.223022	0.0743125	0.102103	0.162298	0.166538	0.122132	0.0877697	0.231391	0.0304278	0.159556	0.202977	0.212481	0.243227	0.274754	0.0811997	0.122491	0.183045	0.204968	0.117131	0.297537	0.268878	0.267053	0.206515	0.136185	0.171026	0.288649	0.177964	0.206529	0.305542	0.120649	0.322196
	87.3469	0.188048	0.0619716	0.230777	0.152589	0.0901733	0.114002	0.149732	0.228741	0.205375	0.194719	0.00744932	0.191302	0.26772	0.174016	0.166378	0.149464	0.154572	0.221492	0.07192	0.102176	0.160745	0.163414	0.123963	0.0901141	0.22783	0.0314527	0.158823	0.201927	0.211985	0.244661	0.27553	0.0812949	0.121345	0.184684	0.201923	0.117131	0.29449	0.265702	0.265001	0.203735	0.132951	0.168656	0.287505	0.178202	0.205973	0.304833	0.120053	0.321088
	87.7551	0.189261	0.0640241	0.234341	0.151877	0.0865332	0.114507	0.145785	0.224733	0.210929	0.199037	0.00568135	0.19068	0.268261	0.175043	0.163772	0.146273	0.153511	0.220757	0.0695531	0.102328	0.159513	0.160386	0.125787	0.0924074	0.224329	0.0348175	0.158071	0.200977	0.21141	0.245918	0.276287	0.0820453	0.12018	0.186221	0.198993	0.117188	0.291358	0.262244	0.262943	0.200975	0.129524	0.166314	0.286179	0.178447	0.205566	0.304113	0.11942	0.319919
	88.1633	0.190759	0.0658383	0.237957	0.151306	0.0833118	0.114997	0.141849	0.220763	0.216389	0.203155	0.00396204	0.190055	0.268775	0.176075	0.161084	0.143017	0.152428	0.220793	0.0672081	0.102534	0.158589	0.157464	0.127585	0.0946554	0.220896	0.0397872	0.157296	0.200093	0.210755	0.246989	0.277013	0.0833711	0.118993	0.18764	0.196211	0.117287	0.288137	0.258516	0.260884	0.198247	0.125912	0.163995	0.284671	0.1787	0.205303	0.303379	0.118763	0.318678
	88.5714	0.192492	0.0674202	0.241589	0.150871	0.0805419	0.115443	0.137925	0.216841	0.221729	0.207039	0.00246634	0.189424	0.269229	0.17708	0.158317	0.139701	0.151318	0.221575	0.0648846	0.10277	0.157953	0.15466	0.129337	0.0968414	0.217531	0.0456899	0.156492	0.199235	0.210014	0.247862	0.277682	0.0851621	0.117789	0.188925	0.193558	0.117412	0.284815	0.254524	0.258813	0.195553	0.122123	0.161707	0.282975	0.178962	0.205179	0.302623	0.118062	0.317355
	88.9796	0.194433	0.0687607	0.245207	0.150572	0.0782588	0.115829	0.134021	0.21298	0.226933	0.210691	0.00192165	0.188781	0.269621	0.178035	0.155483	0.136335	0.150178	0.223044	0.0625769	0.103021	0.157583	0.151986	0.131034	0.0989726	0.214239	0.0520687	0.155646	0.198372	0.209195	0.248527	0.278281	0.0873202	0.116569	0.190071	0.19105	0.117552	0.281386	0.250298	0.256736	0.192908	0.118168	0.159451	0.281093	0.179235	0.205188	0.301841	0.117326	0.315941
	89.3878	0.196538	0.0698587	0.248779	0.150407	0.0764818	0.116134	0.130147	0.209187	0.231975	0.214077	0.00294555	0.188126	0.26992	0.178929	0.15258	0.132921	0.149009	0.225124	0.060285	0.103256	0.157441	0.149461	0.132655	0.101039	0.211021	0.0586269	0.154745	0.197473	0.208291	0.248974	0.278782	0.0897274	0.115333	0.191073	0.188694	0.117699	0.277841	0.245837	0.254643	0.190312	0.114057	0.157221	0.279024	0.17952	0.205316	0.301022	0.116551	0.314424
	89.7959	0.198765	0.0707142	0.252282	0.150371	0.0752167	0.116348	0.126308	0.20547	0.236844	0.217207	0.0045865	0.187454	0.270112	0.179758	0.149622	0.129469	0.147807	0.227735	0.0580042	0.103466	0.157498	0.147101	0.1342	0.103041	0.207876	0.0651771	0.153775	0.19651	0.20731	0.249192	0.279169	0.0922887	0.114085	0.191934	0.186478	0.117847	0.274181	0.241178	0.252536	0.187779	0.109804	0.155026	0.276768	0.179822	0.205556	0.300161	0.115735	0.312796
	90.2041	0.20108	0.071319	0.255695	0.150465	0.0744613	0.11646	0.122522	0.201835	0.241521	0.220067	0.00637311	0.186765	0.270183	0.18053	0.146612	0.125983	0.146574	0.230767	0.0557324	0.103629	0.15771	0.144928	0.135654	0.104981	0.204805	0.0715955	0.152719	0.195461	0.206253	0.249175	0.279423	0.0949075	0.112821	0.192659	0.184432	0.118001	0.270407	0.236334	0.250415	0.185312	0.105424	0.15285	0.27433	0.180148	0.205888	0.299246	0.114897	0.311047
	90.6123	0.203431	0.0716838	0.258999	0.150684	0.0741882	0.116461	0.118793	0.198286	0.245991	0.222653	0.00819654	0.186058	0.270111	0.181252	0.143565	0.122469	0.14531	0.234129	0.053467	0.103737	0.15804	0.142962	0.137017	0.10685	0.201806	0.0777935	0.151565	0.194306	0.205124	0.248917	0.279527	0.0975001	0.111543	0.193251	0.182534	0.118161	0.266525	0.231336	0.248275	0.182916	0.100936	0.150703	0.271709	0.180506	0.206299	0.298271	0.114027	0.309172
	91.0204	0.205787	0.0718039	0.26218	0.151028	0.0743701	0.11635	0.115138	0.194826	0.250246	0.224981	0.0100156	0.18533	0.269898	0.181933	0.140492	0.118937	0.144015	0.237705	0.0512027	0.103786	0.158448	0.141223	0.138286	0.10866	0.198879	0.0837153	0.150302	0.193031	0.203933	0.248416	0.279474	0.100001	0.110246	0.193717	0.180812	0.118339	0.26255	0.22622	0.246122	0.180602	0.0963609	0.148577	0.268915	0.180908	0.206771	0.297231	0.113152	0.307168
	91.4286	0.208093	0.0716971	0.265215	0.151492	0.0749559	0.116121	0.111561	0.191458	0.25427	0.22703	0.0118152	0.18458	0.269521	0.182576	0.137402	0.115388	0.142692	0.241396	0.0489383	0.103764	0.158892	0.13973	0.139457	0.1104	0.19602	0.0893147	0.148926	0.191623	0.202681	0.24767	0.279252	0.102341	0.108929	0.194055	0.179257	0.11854	0.258491	0.221011	0.24395	0.178369	0.0917208	0.14647	0.265947	0.181367	0.207285	0.296118	0.112269	0.305031
	91.8367	0.210314	0.0713733	0.268084	0.152071	0.0758986	0.115774	0.108069	0.188184	0.258059	0.228827	0.0135858	0.183807	0.268989	0.183172	0.134313	0.111835	0.141338	0.245102	0.0466669	0.103681	0.15934	0.138498	0.140536	0.112083	0.193225	0.0945666	0.147436	0.190076	0.201384	0.246682	0.278864	0.104479	0.10759	0.194269	0.177877	0.118773	0.254364	0.215765	0.241766	0.176229	0.0870416	0.144387	0.262817	0.181896	0.207823	0.294933	0.1114	0.302767
	92.2449	0.212406	0.0708514	0.270761	0.152761	0.0771408	0.115308	0.10467	0.185004	0.261599	0.230355	0.0153206	0.183009	0.268292	0.183708	0.131226	0.108281	0.139955	0.248723	0.0443876	0.103529	0.159746	0.137544	0.141514	0.113704	0.190489	0.0994494	0.14583	0.188385	0.200039	0.245456	0.278309	0.106363	0.106223	0.194355	0.176688	0.119048	0.250179	0.210508	0.239567	0.174179	0.082345	0.142318	0.25953	0.182504	0.208363	0.293674	0.110555	0.300373
	92.6531	0.214325	0.0701579	0.273211	0.153548	0.0786255	0.114722	0.101361	0.181919	0.264884	0.23163	0.0170196	0.182182	0.267428	0.184159	0.128155	0.104736	0.13854	0.25218	0.0420956	0.103314	0.160082	0.136872	0.142401	0.115266	0.187806	0.10395	0.144116	0.186548	0.198659	0.243998	0.27759	0.107963	0.104831	0.194311	0.175674	0.119374	0.245945	0.2053	0.237353	0.172228	0.0776573	0.140276	0.256091	0.183201	0.208889	0.292345	0.10974	0.297857
	93.0612	0.216046	0.0693098	0.275405	0.154424	0.0803032	0.114021	0.09815	0.178928	0.267907	0.232656	0.0186771	0.181325	0.266402	0.184499	0.125098	0.101208	0.137094	0.25538	0.0397899	0.103035	0.160305	0.136492	0.143192	0.116779	0.185169	0.108062	0.142292	0.184568	0.197247	0.242311	0.276716	0.109247	0.103408	0.194138	0.174867	0.11976	0.241666	0.20018	0.235127	0.170375	0.0730007	0.138252	0.252513	0.183989	0.209378	0.290946	0.108981	0.295217
	93.4694	0.217526	0.068342	0.277305	0.155371	0.0821177	0.113203	0.0950346	0.176027	0.270657	0.233432	0.0202936	0.180435	0.2652	0.184703	0.122058	0.0977001	0.135613	0.258261	0.0374714	0.102688	0.160386	0.136401	0.14389	0.118235	0.182569	0.111774	0.140363	0.182449	0.195804	0.240403	0.275687	0.110187	0.101956	0.193837	0.174243	0.120218	0.237345	0.195197	0.232884	0.168623	0.0683987	0.136255	0.2488	0.184869	0.209813	0.289479	0.108275	0.292456
	93.8776	0.218754	0.0672713	0.278884	0.156377	0.0840313	0.112281	0.0920218	0.173213	0.273134	0.233989	0.0218638	0.17951	0.263834	0.184752	0.119034	0.0942255	0.134097	0.260748	0.0351405	0.102282	0.160295	0.136598	0.144498	0.119648	0.179999	0.115086	0.138326	0.180198	0.194339	0.238279	0.274514	0.110772	0.100473	0.193417	0.173826	0.120763	0.232986	0.19041	0.230632	0.166975	0.0638757	0.134282	0.244966	0.185839	0.210173	0.287948	0.107652	0.289575
	94.2857	0.219701	0.0661301	0.280115	0.157427	0.0859981	0.111257	0.0891171	0.17048	0.275326	0.234322	0.0233833	0.17855	0.262288	0.184641	0.116016	0.0907833	0.132548	0.262786	0.0328053	0.101807	0.159998	0.137074	0.145014	0.12101	0.177451	0.117988	0.136177	0.177826	0.192848	0.235944	0.273197	0.110978	0.0989568	0.192886	0.173612	0.12141	0.228588	0.185854	0.228365	0.165427	0.0594538	0.132332	0.241018	0.186893	0.210442	0.286349	0.107114	0.286571
	94.6939	0.22036	0.0649406	0.280985	0.158503	0.0879887	0.110145	0.0863243	0.167821	0.277235	0.234471	0.0248489	0.177553	0.260569	0.184371	0.113007	0.0873858	0.130963	0.264321	0.030471	0.101276	0.15948	0.137818	0.145449	0.122331	0.174918	0.12048	0.133912	0.175344	0.191341	0.233403	0.271745	0.110806	0.0974087	0.192264	0.173597	0.12218	0.224159	0.1816	0.226091	0.163984	0.0551614	0.130415	0.236969	0.188025	0.210605	0.284684	0.106681	0.283446
	95.102	0.220722	0.0637271	0.281487	0.159597	0.0899736	0.108955	0.0836566	0.165227	0.278855	0.234448	0.0262525	0.17652	0.258676	0.18396	0.109995	0.0840348	0.12935	0.265305	0.0281518	0.100689	0.158713	0.138817	0.145798	0.123611	0.172396	0.122561	0.131523	0.172767	0.189816	0.230665	0.270161	0.110244	0.0958235	0.191567	0.173801	0.123093	0.219707	0.177679	0.22381	0.16264	0.0510237	0.128522	0.232831	0.189227	0.210643	0.282949	0.106371	0.280197
	95.5102	0.220775	0.062521	0.281622	0.16069	0.0919275	0.107701	0.0811155	0.162689	0.280186	0.234279	0.0275931	0.17545	0.256606	0.183427	0.106983	0.0807367	0.127708	0.265707	0.0258619	0.100052	0.157691	0.140052	0.146074	0.124849	0.169878	0.124231	0.129008	0.170111	0.188279	0.227737	0.268451	0.109299	0.094202	0.190814	0.174201	0.124171	0.215244	0.174154	0.221527	0.161395	0.0470733	0.126667	0.228612	0.190494	0.210548	0.281142	0.106189	0.276828
	95.9184	0.220524	0.0613417	0.281403	0.161779	0.093837	0.106397	0.078713	0.160198	0.281232	0.234	0.0288649	0.174345	0.254377	0.182798	0.103964	0.0775005	0.126045	0.265485	0.0236223	0.0993814	0.1564	0.141506	0.146278	0.126053	0.167364	0.125502	0.126363	0.167394	0.186735	0.224628	0.266629	0.107981	0.092538	0.190026	0.174824	0.125434	0.210787	0.171066	0.219251	0.16025	0.0433417	0.124846	0.22433	0.19182	0.210305	0.279261	0.106164	0.273341
	96.3265	0.21995	0.0602279	0.280841	0.162851	0.0956809	0.105052	0.0764498	0.157743	0.28199	0.233618	0.0300674	0.173206	0.251985	0.182093	0.100937	0.074327	0.124367	0.264625	0.0214616	0.0986772	0.154839	0.143153	0.146417	0.127215	0.16485	0.126381	0.123594	0.164633	0.185185	0.22135	0.264699	0.106293	0.0908311	0.189217	0.175649	0.126898	0.206354	0.168454	0.216984	0.159197	0.0398635	0.123072	0.219992	0.193202	0.209907	0.277303	0.106294	0.269742
	96.7347	0.219064	0.0592009	0.279953	0.163898	0.0974559	0.103684	0.0743283	0.15532	0.28247	0.233179	0.0312008	0.172032	0.249456	0.181327	0.0979044	0.07123	0.122676	0.263103	0.0194143	0.0979611	0.153011	0.144971	0.146498	0.128346	0.162334	0.12689	0.120708	0.161847	0.183636	0.217916	0.262683	0.10426	0.0890777	0.188405	0.176686	0.128578	0.201963	0.166365	0.214741	0.158238	0.0366752	0.121354	0.215616	0.194637	0.209346	0.275271	0.106603	0.266041
	97.1429	0.217848	0.0582983	0.278749	0.164913	0.0991488	0.102297	0.0723501	0.152917	0.282667	0.23268	0.0322639	0.170824	0.246796	0.180504	0.0948597	0.0682099	0.12098	0.260912	0.0175326	0.0972335	0.150914	0.146933	0.14652	0.129438	0.159816	0.127047	0.117716	0.159054	0.182086	0.21434	0.26059	0.101892	0.087276	0.187597	0.177933	0.13048	0.197629	0.164811	0.212522	0.157364	0.0338092	0.119699	0.211211	0.196119	0.208616	0.273166	0.107089	0.262246
	97.551	0.216305	0.0575467	0.277241	0.165885	0.100758	0.100903	0.0705074	0.150533	0.282591	0.232157	0.0332608	0.169581	0.244023	0.17962	0.0918077	0.0652788	0.11928	0.258051	0.0158792	0.0965059	0.14856	0.149008	0.146494	0.130493	0.157294	0.126877	0.114636	0.156272	0.180543	0.210637	0.25844	0.0992147	0.0854279	0.186805	0.179373	0.132605	0.193367	0.163829	0.210339	0.156575	0.0312989	0.118131	0.206791	0.197642	0.207717	0.270993	0.107759	0.258372
	97.9592	0.214437	0.0569728	0.275434	0.166806	0.102282	0.0995066	0.0688026	0.148161	0.282242	0.231618	0.0341888	0.168302	0.241159	0.178665	0.0887384	0.0624424	0.117584	0.254513	0.0145397	0.0957855	0.145949	0.151169	0.146412	0.131515	0.154768	0.126406	0.11148	0.153516	0.179001	0.206819	0.256249	0.096247	0.0835321	0.186032	0.181024	0.134948	0.189183	0.163407	0.208197	0.155863	0.0291661	0.116654	0.202373	0.199197	0.206643	0.268756	0.108619	0.254426
	98.3674	0.212237	0.0566038	0.27333	0.167661	0.103716	0.0981119	0.0672262	0.145798	0.281624	0.231074	0.0350504	0.166986	0.238206	0.177624	0.0856514	0.0597055	0.115892	0.250318	0.0136058	0.0950685	0.143095	0.153382	0.146282	0.132493	0.152238	0.125655	0.108266	0.150801	0.177461	0.202901	0.254029	0.0930101	0.0815951	0.185286	0.182849	0.137499	0.185082	0.163556	0.2061	0.155223	0.0274259	0.115295	0.197964	0.200772	0.205398	0.26646	0.109653	0.250422
	98.7755	0.209728	0.0564495	0.270938	0.168442	0.105068	0.0967262	0.0657794	0.143442	0.280743	0.230551	0.0358436	0.165633	0.235192	0.17649	0.0825393	0.05708	0.114208	0.245464	0.0131618	0.0943683	0.140002	0.155619	0.146101	0.133438	0.149703	0.124652	0.105002	0.148141	0.175923	0.198893	0.251797	0.0895354	0.0796187	0.184576	0.184866	0.140243	0.181067	0.16425	0.204059	0.154651	0.0260752	0.114066	0.193582	0.20235	0.203981	0.26411	0.110872	0.246371
	99.1837	0.206906	0.0565282	0.268263	0.169135	0.106333	0.0953482	0.0644598	0.14109	0.2796	0.230043	0.036566	0.16424	0.232113	0.175257	0.0793942	0.054565	0.112539	0.239977	0.0132482	0.0936759	0.136679	0.157848	0.145867	0.134332	0.147164	0.123413	0.101701	0.145545	0.174378	0.194806	0.249552	0.0858406	0.0776102	0.183909	0.187045	0.143161	0.177134	0.165462	0.20207	0.154136	0.0250938	0.112986	0.189236	0.203915	0.202398	0.261708	0.112247	0.242279
	99.5918	0.203802	0.0568326	0.26532	0.169728	0.107521	0.0939864	0.0632657	0.13874	0.278204	0.229582	0.037218	0.162807	0.22899	0.173933	0.076216	0.0521733	0.110884	0.23387	0.0138406	0.0930028	0.133144	0.160042	0.145584	0.135184	0.144623	0.121963	0.0983662	0.143023	0.172828	0.190648	0.247308	0.0819657	0.0755756	0.1833	0.189379	0.146234	0.173288	0.167162	0.200145	0.153676	0.0244442	0.112076	0.184942	0.205448	0.200652	0.259256	0.113783	0.238159
	100	0.200427	0.0573639	0.262131	0.170215	0.108631	0.0926386	0.0622031	0.136389	0.276557	0.229159	0.0377952	0.161334	0.225827	0.172538	0.072995	0.049905	0.109254	0.227164	0.0148626	0.0923497	0.129404	0.162173	0.145243	0.135984	0.142083	0.120321	0.095002	0.140582	0.171262	0.186428	0.245059	0.077936	0.0735197	0.182758	0.191864	0.14944	0.169527	0.169289	0.198281	0.153259	0.0240705	0.111346	0.18071	0.20693	0.198747	0.25675	0.115455	0.234016
	100.408	0.196804	0.0581041	0.258726	0.170584	0.109668	0.0913099	0.0612669	0.134037	0.27467	0.228795	0.0383008	0.15982	0.222631	0.171096	0.0697387	0.0477679	0.107651	0.219891	0.0162098	0.0917189	0.125486	0.164218	0.144855	0.136726	0.139548	0.118507	0.0916143	0.138227	0.169682	0.182154	0.242807	0.0737924	0.0714517	0.182301	0.194466	0.152759	0.165858	0.171811	0.196486	0.152881	0.0239122	0.110823	0.17655	0.208346	0.196696	0.25419	0.11725	0.229864
	100.816	0.192959	0.0590349	0.255145	0.170836	0.110639	0.0900004	0.0604634	0.13168	0.272549	0.22849	0.0387337	0.158267	0.219425	0.169641	0.066445	0.0457689	0.106085	0.21207	0.0177883	0.0911239	0.121405	0.166156	0.144411	0.137414	0.137024	0.116549	0.0882061	0.135959	0.168079	0.177833	0.240549	0.0695766	0.0693743	0.181939	0.197197	0.156169	0.16229	0.174655	0.194761	0.152532	0.0239016	0.11051	0.172477	0.209681	0.194503	0.251572	0.119161	0.225711
	101.225	0.1889	0.0601358	0.251428	0.170964	0.111543	0.0887079	0.059786	0.12932	0.270202	0.228236	0.0390983	0.156673	0.216207	0.168204	0.0631244	0.0439088	0.104561	0.203745	0.0195159	0.0905585	0.117189	0.167969	0.143917	0.138031	0.134515	0.114469	0.0847885	0.133778	0.166453	0.173475	0.23828	0.0653268	0.0672969	0.181681	0.200013	0.159646	0.158831	0.17778	0.193105	0.152204	0.0239799	0.110431	0.168496	0.210926	0.192181	0.24889	0.121157	0.221573
	101.633	0.184658	0.0613753	0.247623	0.170971	0.112392	0.0874339	0.0592321	0.126956	0.267644	0.228045	0.0393999	0.15504	0.213008	0.166813	0.0597875	0.0422008	0.103084	0.194942	0.021335	0.0900377	0.112868	0.16964	0.143372	0.138585	0.132029	0.112299	0.0813724	0.131681	0.164803	0.169089	0.236002	0.0610999	0.0652236	0.181536	0.202922	0.163171	0.155495	0.181123	0.191526	0.151893	0.0240929	0.110591	0.164622	0.212075	0.18974	0.246144	0.123241	0.217466
	102.041	0.180233	0.0627363	0.243767	0.170857	0.113181	0.0861685	0.0587962	0.124591	0.264877	0.227884	0.0396425	0.153366	0.209831	0.165485	0.056443	0.0406432	0.101663	0.185708	0.0231996	0.0895545	0.108464	0.171155	0.142773	0.13906	0.129572	0.110067	0.0779739	0.129663	0.16312	0.164686	0.233706	0.0569364	0.0631628	0.181501	0.205896	0.166716	0.152289	0.184631	0.190015	0.151586	0.0241984	0.111002	0.160857	0.213122	0.187192	0.243331	0.125377	0.213406
	102.449	0.175651	0.064186	0.239901	0.170621	0.113918	0.084911	0.058465	0.122228	0.261919	0.22776	0.0398355	0.151652	0.206698	0.16423	0.0531104	0.0392484	0.100297	0.176085	0.0250777	0.0891104	0.104014	0.1725	0.142126	0.139459	0.127149	0.107804	0.0746121	0.127717	0.161408	0.160275	0.231398	0.0529006	0.0611234	0.181574	0.208916	0.170256	0.149225	0.188263	0.18858	0.15128	0.0242652	0.111674	0.157213	0.214063	0.184551	0.240453	0.127563	0.209416
	102.857	0.170921	0.0657113	0.236053	0.170266	0.114604	0.0836489	0.058235	0.119872	0.258773	0.227636	0.0399822	0.149895	0.203625	0.163046	0.0497962	0.0380183	0.0989928	0.166115	0.0269459	0.0887049	0.0995382	0.173663	0.14142	0.139777	0.124764	0.105542	0.0713038	0.125831	0.159656	0.155866	0.229072	0.0490454	0.059113	0.181744	0.21198	0.173764	0.146303	0.191956	0.18721	0.150964	0.0242695	0.112602	0.153693	0.214892	0.181827	0.23751	0.129775	0.205511
	103.265	0.166055	0.0672894	0.232244	0.169787	0.115238	0.0823756	0.0580901	0.117528	0.255451	0.2275	0.0400915	0.148093	0.200616	0.161923	0.0465202	0.0369575	0.0977467	0.155856	0.0287833	0.0883234	0.0950699	0.174629	0.14066	0.140003	0.122422	0.103302	0.0680688	0.123995	0.157867	0.151467	0.226726	0.0454367	0.0571458	0.182	0.215046	0.177211	0.143524	0.195687	0.185904	0.150633	0.0241991	0.113796	0.150299	0.215605	0.179036	0.234506	0.131992	0.201713
	103.674	0.161084	0.0689082	0.228493	0.169185	0.115825	0.0810824	0.0580275	0.115204	0.251962	0.227333	0.0401678	0.146247	0.197691	0.160849	0.0432908	0.0360733	0.0965606	0.145348	0.0305775	0.087971	0.090631	0.175389	0.139837	0.140145	0.120126	0.101111	0.0649186	0.122195	0.156031	0.147085	0.224359	0.0421472	0.0552306	0.182327	0.218124	0.180569	0.140885	0.199398	0.184654	0.150278	0.0240444	0.115239	0.14704	0.21619	0.176187	0.231445	0.134206	0.198036
	104.082	0.156015	0.0705587	0.224805	0.168455	0.116357	0.0797583	0.0580385	0.112904	0.248312	0.227101	0.0402166	0.144352	0.194839	0.159811	0.0401229	0.035361	0.095431	0.134655	0.0323128	0.0876296	0.0862485	0.175931	0.138951	0.140186	0.117877	0.0989816	0.0618648	0.120416	0.154143	0.142724	0.221961	0.0392427	0.0533828	0.18271	0.22117	0.183809	0.138377	0.203063	0.183448	0.14989	0.0238051	0.116932	0.14391	0.216639	0.173295	0.228327	0.136382	0.194496
	104.49	0.150889	0.0722269	0.221193	0.167595	0.11684	0.0784008	0.058118	0.110634	0.244515	0.226803	0.0402454	0.142408	0.192077	0.158807	0.0370325	0.0348288	0.0943538	0.123824	0.0339811	0.0873015	0.081952	0.176247	0.138001	0.140134	0.115677	0.0969302	0.0589121	0.118645	0.152199	0.138387	0.219528	0.0368067	0.0516139	0.183139	0.224182	0.186908	0.135994	0.206643	0.18228	0.149464	0.0234839	0.118855	0.140915	0.216938	0.17037	0.225154	0.138521	0.191105
	104.898	0.14572	0.0739131	0.217661	0.166604	0.117265	0.0769993	0.0582677	0.108398	0.240573	0.226398	0.040258	0.140414	0.189392	0.157839	0.0340318	0.0344678	0.0933289	0.112917	0.0355716	0.0869798	0.0777639	0.176331	0.136979	0.139977	0.113529	0.0949624	0.0560612	0.116867	0.150188	0.134076	0.217044	0.0348942	0.0499359	0.183598	0.227139	0.189843	0.133728	0.2101	0.181132	0.14899	0.0230886	0.120988	0.138048	0.217078	0.167421	0.221924	0.140587	0.187872
	105.306	0.140544	0.0756016	0.21422	0.16548	0.117633	0.0755556	0.058479	0.106199	0.236502	0.225891	0.0402648	0.138371	0.186785	0.15692	0.0311471	0.0342794	0.0923483	0.102003	0.0370769	0.0866574	0.0737224	0.176179	0.135894	0.139716	0.111432	0.0930833	0.0533138	0.115068	0.148111	0.129792	0.214501	0.0335624	0.0483615	0.184085	0.230011	0.192597	0.131576	0.213416	0.179999	0.148465	0.0226358	0.123317	0.135308	0.217048	0.164462	0.218635	0.142576	0.184807
	105.714	0.135385	0.0772928	0.210881	0.16423	0.117938	0.0740642	0.0587565	0.104039	0.23231	0.225254	0.0402713	0.136277	0.184259	0.156071	0.0283954	0.034257	0.0914136	0.0911481	0.0384926	0.0863408	0.0698524	0.17579	0.134738	0.139352	0.109388	0.0912985	0.050667	0.113235	0.145957	0.125538	0.211884	0.0328219	0.0468971	0.184588	0.232805	0.195157	0.129535	0.216544	0.178863	0.147879	0.0221454	0.125805	0.132691	0.216842	0.161496	0.215281	0.144471	0.181914
	106.123	0.130259	0.0789739	0.207659	0.162853	0.118173	0.0725259	0.05909	0.10192	0.228006	0.224472	0.0402884	0.134134	0.181801	0.155317	0.0258103	0.0343912	0.0905174	0.0804524	0.0398121	0.0860145	0.0661943	0.175166	0.133521	0.138874	0.107398	0.0896061	0.0481252	0.111356	0.143726	0.121316	0.20918	0.0326558	0.0455532	0.185104	0.235473	0.197512	0.127609	0.219476	0.177716	0.147227	0.0216499	0.128438	0.130188	0.216459	0.158537	0.21186	0.146254	0.179201
	106.531	0.125197	0.0806392	0.204569	0.161361	0.118338	0.0709421	0.0594766	0.0998415	0.223606	0.22354	0.0403255	0.131943	0.179425	0.154685	0.0234187	0.0346799	0.0896584	0.0700206	0.0410364	0.0856859	0.06278	0.174312	0.132241	0.138295	0.105464	0.088013	0.0456921	0.109422	0.141414	0.11713	0.206384	0.0330092	0.0443313	0.185623	0.238032	0.199657	0.125803	0.222176	0.176546	0.146505	0.0211866	0.131174	0.127798	0.2159	0.155587	0.208367	0.147928	0.176672
	106.939	0.120197	0.0822846	0.201622	0.159759	0.118421	0.069309	0.0599079	0.097804	0.219115	0.222424	0.040391	0.129705	0.177119	0.154193	0.0212545	0.0351058	0.0888324	0.0600206	0.042162	0.0853405	0.0596429	0.17323	0.130901	0.1376	0.103583	0.0865169	0.0433791	0.107423	0.139018	0.112985	0.203483	0.0337942	0.0432365	0.186137	0.240441	0.201584	0.124121	0.224633	0.175339	0.145705	0.0208015	0.133995	0.125505	0.215169	0.152656	0.204799	0.149467	0.174332
	107.347	0.115287	0.0838997	0.198829	0.158055	0.118423	0.0676318	0.06037	0.09581	0.214551	0.22113	0.0404957	0.12742	0.174894	0.153854	0.0193515	0.0356674	0.088032	0.0506836	0.0431914	0.0849721	0.0568179	0.171928	0.129508	0.136801	0.101755	0.0851221	0.0412012	0.10535	0.136541	0.108889	0.200481	0.0349254	0.0422677	0.186634	0.242698	0.20329	0.122573	0.226832	0.174093	0.144826	0.0205443	0.136867	0.123307	0.214272	0.149747	0.201159	0.150881	0.172185
	107.755	0.110466	0.0854905	0.196186	0.156261	0.118333	0.0659045	0.0608586	0.0938584	0.209918	0.219619	0.040644	0.125091	0.172747	0.153669	0.017733	0.0363473	0.0872548	0.0423869	0.0441253	0.0845751	0.0543245	0.170412	0.128054	0.135895	0.0999779	0.083828	0.0391747	0.103198	0.133975	0.104847	0.197373	0.0362982	0.0414227	0.187095	0.244793	0.204769	0.121159	0.228753	0.172787	0.143861	0.0204602	0.139761	0.121189	0.213215	0.146862	0.197448	0.152149	0.17023
	108.163	0.105747	0.0870494	0.193688	0.154378	0.118146	0.0641316	0.0613561	0.0919518	0.20523	0.217895	0.0408439	0.122717	0.170673	0.153626	0.016423	0.0371376	0.0864883	0.0357332	0.0449641	0.0841287	0.0521893	0.168685	0.126552	0.134881	0.098247	0.0826309	0.0373217	0.10096	0.131326	0.100865	0.194166	0.0378385	0.0406993	0.187505	0.246694	0.206013	0.11988	0.230403	0.171421	0.142808	0.0205905	0.142658	0.119141	0.212002	0.144006	0.193672	0.153273	0.16847
	108.571	0.10115	0.088588	0.191315	0.152416	0.117859	0.0623109	0.0618608	0.09009	0.200493	0.21594	0.0410961	0.120298	0.168678	0.153704	0.0154178	0.0380275	0.0857284	0.0315684	0.0457115	0.0836354	0.0504149	0.166754	0.124992	0.133771	0.0965576	0.0815292	0.0356581	0.0986327	0.128585	0.0969486	0.190863	0.0394655	0.0400889	0.18784	0.248416	0.20702	0.11873	0.231757	0.169979	0.141664	0.020959	0.14552	0.117157	0.210633	0.141176	0.189836	0.154245	0.166898
	108.98	0.0966769	0.0901078	0.18904	0.150373	0.11746	0.0604443	0.0623624	0.0882727	0.195715	0.213743	0.041402	0.117836	0.16674	0.153876	0.0147071	0.0389996	0.0849622	0.0306727	0.0463651	0.083074	0.0490069	0.164624	0.123381	0.132554	0.094903	0.0805091	0.0342024	0.096213	0.125756	0.0931012	0.187466	0.0411244	0.0395875	0.188084	0.249915	0.207781	0.1177	0.232829	0.168454	0.140423	0.0215762	0.148336	0.115217	0.209109	0.138375	0.185948	0.155052	0.165509
	109.388	0.0923621	0.0916178	0.186833	0.148254	0.116951	0.058538	0.0628584	0.0864999	0.190907	0.211316	0.0417607	0.115332	0.164863	0.154118	0.0142476	0.0400489	0.0841813	0.0330324	0.0469287	0.082446	0.0479515	0.162302	0.121718	0.131249	0.0932773	0.0795628	0.0329664	0.0937005	0.122833	0.0893254	0.183984	0.0427683	0.0391829	0.188218	0.251204	0.208296	0.11678	0.233599	0.166837	0.139088	0.0224376	0.151068	0.11332	0.207424	0.135598	0.182014	0.155702	0.164289
	109.796	0.0882091	0.0931277	0.184655	0.146061	0.116321	0.0565931	0.0633505	0.0847668	0.186069	0.208642	0.042167	0.112786	0.163022	0.154405	0.0139877	0.0411535	0.0833776	0.0377927	0.0474001	0.0817449	0.0472271	0.159795	0.120003	0.129846	0.0916733	0.0786719	0.0319591	0.0910953	0.119813	0.0856221	0.180414	0.044354	0.0388669	0.188228	0.252258	0.208562	0.115953	0.234069	0.165114	0.13765	0.0235253	0.1537	0.111447	0.205577	0.132843	0.178036	0.156172	0.163223
	110.204	0.0842486	0.0946377	0.182477	0.143793	0.115569	0.0546232	0.0638324	0.0830712	0.181217	0.205751	0.0426191	0.110203	0.161209	0.154725	0.0138616	0.0423071	0.0825395	0.0439327	0.0477811	0.0809639	0.0468075	0.157112	0.118246	0.128357	0.090085	0.0778214	0.0311897	0.0884004	0.116698	0.081992	0.176764	0.0458626	0.0386268	0.188109	0.253064	0.208583	0.115209	0.234238	0.163286	0.136114	0.0248183	0.156206	0.109593	0.203563	0.130105	0.174022	0.156475	0.162296
	110.612	0.0804908	0.0961582	0.180266	0.141459	0.11469	0.0526323	0.0643116	0.0814055	0.17635	0.202635	0.0431086	0.107584	0.159413	0.155074	0.0138012	0.0434922	0.081665	0.0507425	0.0480735	0.0801124	0.0466499	0.154266	0.116442	0.126787	0.0885067	0.0769976	0.0306632	0.08562	0.113482	0.0784371	0.173029	0.047262	0.0384487	0.187853	0.25363	0.208364	0.114537	0.234089	0.161336	0.134475	0.0262891	0.158557	0.107747	0.201381	0.127379	0.169969	0.156598	0.161482
	111.02	0.0769452	0.0976802	0.178004	0.139057	0.113679	0.0506348	0.0647792	0.0797634	0.171481	0.199318	0.0436322	0.104933	0.157612	0.155457	0.0137495	0.0446951	0.0807441	0.0577777	0.0482771	0.0791766	0.0467219	0.151267	0.114606	0.125133	0.0869336	0.0761842	0.0303913	0.0827596	0.110172	0.0749593	0.169213	0.0485479	0.0383203	0.187466	0.253917	0.207914	0.11393	0.233637	0.159268	0.132735	0.0279115	0.16074	0.105897	0.199036	0.124662	0.16588	0.156544	0.160766
	111.429	0.0736271	0.0992058	0.175677	0.136602	0.112539	0.0486397	0.0652367	0.0781376	0.166617	0.195812	0.044182	0.102254	0.155814	0.155888	0.013649	0.0459077	0.0797774	0.0647874	0.0483986	0.0781686	0.0469752	0.148133	0.112735	0.123412	0.0853619	0.0753776	0.030383	0.0798273	0.106764	0.0715635	0.165322	0.0497055	0.0382232	0.186949	0.253953	0.207244	0.113386	0.232861	0.157074	0.130893	0.0296588	0.16272	0.104041	0.196533	0.121945	0.161756	0.156321	0.160122
	111.837	0.0705226	0.100723	0.173281	0.134099	0.111262	0.0466552	0.0656764	0.0765193	0.161762	0.19212	0.0447518	0.0995525	0.153997	0.156381	0.0134659	0.0471099	0.0787605	0.0716109	0.0484384	0.0770773	0.0473761	0.144874	0.11084	0.121616	0.0837879	0.0745689	0.03065	0.0768303	0.103264	0.0682549	0.161355	0.0507319	0.0381451	0.186308	0.253701	0.206365	0.112903	0.231777	0.154756	0.128951	0.0315013	0.164492	0.102163	0.193884	0.119228	0.157598	0.155919	0.159533
	112.245	0.0676448	0.102223	0.170818	0.131556	0.109854	0.0446938	0.0660883	0.0749035	0.156931	0.188276	0.0453357	0.0968314	0.152172	0.156948	0.0131648	0.0482997	0.0776917	0.0781448	0.0484044	0.0759024	0.0478849	0.141508	0.108925	0.119765	0.0822092	0.0737622	0.0312017	0.0737784	0.0996768	0.0650411	0.15733	0.0516317	0.0380673	0.185547	0.253175	0.205288	0.112483	0.230379	0.152317	0.126911	0.0334125	0.166028	0.100266	0.191098	0.116501	0.153414	0.155363	0.158981
	112.653	0.064974	0.103697	0.168289	0.128987	0.10831	0.0427567	0.0664695	0.0732821	0.152122	0.184266	0.0459234	0.094095	0.150331	0.157591	0.0127317	0.0494581	0.0765724	0.0843264	0.0483003	0.0746448	0.0484685	0.138047	0.106989	0.117855	0.0806222	0.0729594	0.0320367	0.0706804	0.0960051	0.0619296	0.153251	0.0523971	0.0379764	0.184663	0.25237	0.20402	0.112125	0.228673	0.149753	0.124773	0.0353612	0.167318	0.0983376	0.188189	0.113763	0.149207	0.154638	0.158447
	113.061	0.0625137	0.10513	0.165704	0.126393	0.106633	0.0408556	0.0668038	0.0716527	0.14735	0.18013	0.0465093	0.0913469	0.148472	0.1583	0.0121551	0.0505797	0.0753965	0.0900997	0.0481304	0.0732908	0.0491007	0.134502	0.105043	0.115894	0.0790241	0.0721633	0.0331489	0.0675459	0.0922594	0.058927	0.14914	0.0530422	0.0378586	0.183659	0.251266	0.202568	0.111828	0.226676	0.147078	0.122543	0.0373195	0.168353	0.0963749	0.185166	0.111009	0.144989	0.153768	0.15792
	113.469	0.0602602	0.106522	0.163059	0.123786	0.104828	0.0389901	0.067093	0.0700103	0.142613	0.175866	0.0470807	0.0885905	0.146599	0.159051	0.0114314	0.0516549	0.0741673	0.0954416	0.0479013	0.071853	0.0497486	0.130887	0.103075	0.113895	0.0774115	0.0713806	0.0345148	0.0643851	0.0884385	0.0560397	0.145009	0.0535587	0.0377006	0.182524	0.249892	0.200938	0.111581	0.224383	0.144286	0.120221	0.0392603	0.169116	0.0943765	0.182037	0.108233	0.140772	0.152751	0.157382
	113.878	0.0582058	0.107858	0.160352	0.121162	0.10289	0.0371679	0.0673266	0.0683526	0.13792	0.171499	0.047629	0.0858289	0.144693	0.159809	0.0105674	0.0526689	0.0728774	0.100321	0.0476128	0.0703181	0.0503949	0.127209	0.101098	0.111851	0.0757807	0.0706063	0.036105	0.0612074	0.0845544	0.0532702	0.140875	0.0539544	0.0374956	0.181256	0.248208	0.19913	0.111374	0.221822	0.141389	0.11781	0.0411583	0.169613	0.0923333	0.178807	0.105436	0.136566	0.15159	0.156823
	114.286	0.0563681	0.109142	0.157573	0.118527	0.100833	0.0353939	0.0675066	0.0666781	0.133273	0.167059	0.0481425	0.0830653	0.142761	0.160529	0.00956435	0.0536206	0.0715274	0.10473	0.0472708	0.0687004	0.0510101	0.123481	0.0991029	0.109785	0.0741288	0.0698419	0.0378821	0.0580239	0.080607	0.0506204	0.136757	0.0542287	0.0372334	0.179848	0.24625	0.197148	0.111189	0.218986	0.138388	0.115317	0.0429952	0.169824	0.0902514	0.175475	0.102609	0.132386	0.150304	0.156224
	114.694	0.0547338	0.110365	0.154706	0.115877	0.0986511	0.0336714	0.0676357	0.0649824	0.128673	0.162553	0.0486097	0.0803031	0.140778	0.161168	0.00843984	0.0544906	0.070114	0.108659	0.0468736	0.0670036	0.0515783	0.11971	0.0970942	0.107684	0.0724525	0.0690772	0.0398049	0.0548447	0.0766041	0.0480891	0.132658	0.0543756	0.0369126	0.178298	0.243992	0.194994	0.111005	0.215896	0.135287	0.112741	0.0447534	0.169758	0.0881219	0.172042	0.0997561	0.12824	0.148879	0.155573
	115.102	0.0533233	0.111525	0.15174	0.11321	0.096356	0.0320124	0.0677112	0.0632651	0.12413	0.158039	0.0490222	0.0775461	0.138741	0.161687	0.00720911	0.055278	0.0686342	0.112101	0.0464239	0.0652336	0.0520798	0.115909	0.0950768	0.105567	0.0707506	0.0683048	0.0418394	0.0516813	0.0725521	0.0456744	0.128598	0.0544047	0.0365282	0.176607	0.241442	0.192673	0.110803	0.212557	0.132095	0.110091	0.0464234	0.169402	0.08595	0.168507	0.0968709	0.124138	0.147344	0.154852
	115.51	0.0521256	0.11262	0.148658	0.110527	0.0939516	0.030418	0.0677444	0.06152	0.119636	0.153516	0.0493686	0.0747984	0.136638	0.162056	0.00591433	0.055969	0.0670923	0.115064	0.0459229	0.0634132	0.0524986	0.112089	0.0930457	0.103432	0.0690222	0.0675185	0.0439508	0.0485454	0.0684538	0.0433744	0.124575	0.0543039	0.0360796	0.174782	0.238617	0.19019	0.110563	0.208969	0.128809	0.107368	0.0479961	0.168755	0.083735	0.164872	0.0939549	0.120084	0.145686	0.154045
	115.918	0.0511387	0.113635	0.145463	0.107824	0.0914411	0.0289017	0.0677278	0.0597451	0.115204	0.149039	0.0496443	0.0720645	0.134454	0.162265	0.00465153	0.0565551	0.0654852	0.117542	0.0453697	0.0615402	0.0528291	0.108264	0.0910166	0.101281	0.0672686	0.0667087	0.0461172	0.0454482	0.0643232	0.041187	0.120597	0.0540851	0.0355669	0.172838	0.235488	0.187554	0.110273	0.205155	0.125446	0.10458	0.0494646	0.167818	0.0814755	0.161142	0.0910084	0.116084	0.143928	0.153138
	116.326	0.0503571	0.114565	0.142152	0.105109	0.0888396	0.027465	0.067668	0.0579356	0.110832	0.14462	0.0498418	0.0693495	0.132196	0.162313	0.00365706	0.0570346	0.0638226	0.119548	0.0447701	0.0596425	0.0530593	0.104447	0.0889814	0.0991293	0.0654922	0.0658796	0.0483196	0.0424019	0.0601628	0.0391128	0.116669	0.0537445	0.034987	0.170787	0.232103	0.184775	0.109924	0.2011	0.122004	0.101731	0.050824	0.166579	0.0791806	0.157326	0.088031	0.11214	0.142075	0.152116
	116.735	0.049749	0.115387	0.138745	0.10238	0.0861443	0.0261141	0.0675574	0.0560878	0.106528	0.140285	0.0499583	0.066658	0.129851	0.162214	0.00342921	0.0573921	0.0621062	0.121083	0.0441227	0.0577197	0.0531955	0.100649	0.0869537	0.0969624	0.0636961	0.0650287	0.050544	0.0394167	0.05599	0.0371522	0.112788	0.0532855	0.0343423	0.168653	0.228427	0.18186	0.109515	0.196837	0.118499	0.0988262	0.0520648	0.165054	0.0768444	0.153437	0.0850286	0.108254	0.140133	0.150971
	117.143	0.0493115	0.116088	0.135265	0.0996464	0.083374	0.0248524	0.0673892	0.0542018	0.102296	0.136068	0.0499914	0.0639947	0.127435	0.161985	0.00427226	0.057634	0.0603448	0.122157	0.0434346	0.0557885	0.0532352	0.0968854	0.0849312	0.0948029	0.061885	0.0641658	0.0527809	0.0365036	0.0518122	0.0353076	0.108971	0.0527186	0.0336284	0.166447	0.224499	0.178818	0.109047	0.19236	0.114938	0.0958748	0.0531804	0.163231	0.0744787	0.14949	0.0820011	0.104432	0.13813	0.149694
	117.551	0.0490026	0.116647	0.131744	0.0969136	0.08053	0.0236747	0.0671609	0.0522749	0.0981365	0.131956	0.0499373	0.0613636	0.124947	0.161642	0.00584159	0.0577476	0.0585469	0.122782	0.0427073	0.0538614	0.0531871	0.0931644	0.0829136	0.0926378	0.0600626	0.0632972	0.055014	0.0336715	0.0476438	0.033581	0.105214	0.0520356	0.0328469	0.164186	0.220316	0.175655	0.108522	0.187692	0.111331	0.0928794	0.0541593	0.161125	0.0720815	0.145502	0.078957	0.100677	0.136056	0.148282
	117.959	0.0488151	0.117046	0.12822	0.0941844	0.0776236	0.0225844	0.0668561	0.050312	0.0940627	0.127996	0.0497965	0.0587684	0.122394	0.161192	0.00777268	0.0577358	0.0567157	0.122966	0.0419445	0.051939	0.0530578	0.0894947	0.0809073	0.0904787	0.0582334	0.062426	0.0572303	0.0309284	0.0434995	0.0319725	0.101536	0.0512518	0.0319968	0.161879	0.215879	0.172373	0.107947	0.182851	0.107698	0.0898503	0.0549922	0.158743	0.0696585	0.141488	0.0758991	0.0970003	0.133948	0.146736
	118.367	0.0487258	0.117277	0.12472	0.0914686	0.0746679	0.0215696	0.0664789	0.0483151	0.0900682	0.124165	0.0495638	0.056212	0.119789	0.160625	0.00988146	0.0575979	0.0548628	0.122731	0.0411511	0.0500482	0.0528498	0.085884	0.0788984	0.0883281	0.0564003	0.0615582	0.0594059	0.0282821	0.0393871	0.0304811	0.0979413	0.0503565	0.0310787	0.159528	0.211229	0.168973	0.107317	0.177842	0.104038	0.0867915	0.0556708	0.156091	0.0672174	0.137459	0.0728349	0.093409	0.131795	0.145054
	118.775	0.0487182	0.117321	0.121279	0.0887601	0.0716636	0.0206308	0.0660167	0.0462907	0.0861659	0.120495	0.0492391	0.0536969	0.117123	0.159915	0.0120817	0.0573265	0.0529866	0.122087	0.040325	0.0481851	0.0525728	0.0823352	0.0768976	0.086178	0.0545661	0.0606837	0.0615166	0.0257382	0.0353249	0.0291013	0.0944426	0.049355	0.030098	0.157135	0.206334	0.165454	0.106627	0.172706	0.100374	0.0837102	0.0561877	0.153194	0.0647555	0.133425	0.0697717	0.089915	0.129619	0.143243
	119.184	0.0487983	0.117184	0.117909	0.0860656	0.068632	0.0197597	0.0654755	0.0442457	0.0823513	0.116981	0.0488184	0.0512253	0.114409	0.159024	0.0143234	0.0569319	0.0510955	0.121062	0.0394717	0.0463803	0.0522214	0.0788549	0.0748908	0.0840467	0.0527333	0.0597976	0.0635356	0.0233036	0.0313169	0.0278265	0.0910521	0.0482466	0.029057	0.15469	0.201254	0.161814	0.105864	0.167435	0.0967061	0.0806144	0.0565424	0.150051	0.0622874	0.129387	0.0667139	0.0865282	0.127427	0.141301
	119.592	0.0489414	0.11686	0.11462	0.0833756	0.0655715	0.0189523	0.0648576	0.0421847	0.0786288	0.113624	0.0482997	0.0487991	0.11163	0.1579	0.0165684	0.0564019	0.0491892	0.119673	0.0385865	0.0446418	0.051802	0.0754446	0.0728837	0.0819143	0.0509034	0.0588831	0.0654336	0.0209831	0.0273792	0.0266467	0.0877671	0.0470221	0.0279667	0.152193	0.195962	0.158051	0.105011	0.162066	0.0930479	0.0775074	0.0567342	0.146692	0.0598093	0.12535	0.0636722	0.0832554	0.125215	0.139232
	120	0.0491642	0.116354	0.111411	0.0806878	0.0625	0.01821	0.0641641	0.0401164	0.0750022	0.11045	0.0476834	0.0464205	0.10879	0.1565	0.0187992	0.0557469	0.04727	0.117944	0.0376713	0.0429896	0.0513096	0.0721103	0.0708761	0.0797996	0.0490794	0.0579248	0.0671908	0.0187824	0.0235183	0.0255514	0.0845999	0.045694	0.0268335	0.149637	0.190491	0.154167	0.104053	0.1566	0.0894062	0.0743999	0.0567694	0.143118	0.0573329	0.121312	0.06065	0.0801051	0.123005	0.137035
	120.408	0.0494411	0.115671	0.108269	0.0779986	0.0594251	0.0175259	0.0634098	0.0380425	0.0714652	0.107428	0.046968	0.0440919	0.105879	0.154784	0.0209942	0.0549628	0.045344	0.115903	0.0367247	0.0414493	0.0507456	0.0688562	0.0688636	0.0776901	0.0472637	0.0569132	0.0687855	0.0167068	0.0197446	0.0245316	0.0815377	0.0442501	0.0256693	0.147024	0.184861	0.150164	0.102972	0.151051	0.0857808	0.0712944	0.0566542	0.139349	0.0548627	0.117275	0.0576584	0.0770759	0.120779	0.134707
	120.816	0.0497677	0.11481	0.105188	0.0752987	0.0563523	0.0169083	0.0625886	0.0359694	0.0680304	0.104595	0.0461588	0.0418157	0.102889	0.152737	0.023145	0.0540499	0.0434097	0.113566	0.035744	0.0400237	0.0501146	0.0656872	0.066862	0.0755876	0.0454606	0.0558337	0.0702098	0.0147603	0.0160718	0.0235783	0.0785822	0.0427068	0.0244846	0.144358	0.179056	0.14605	0.101762	0.14544	0.0821892	0.0682004	0.0563952	0.135401	0.0524003	0.113245	0.0547029	0.0741701	0.118563	0.13225
	121.225	0.0501261	0.113774	0.102149	0.0725948	0.0533013	0.0163501	0.0617134	0.0338988	0.0646873	0.10191	0.0452579	0.0395949	0.0998339	0.150361	0.0252394	0.0530194	0.0414798	0.110966	0.0347337	0.0387453	0.0494174	0.0626108	0.0648598	0.0734995	0.0436749	0.0546901	0.0714572	0.0129478	0.0125056	0.0226869	0.0757235	0.041065	0.0232877	0.141648	0.173139	0.141835	0.100418	0.139755	0.0786222	0.0651235	0.056	0.131273	0.0499603	0.109229	0.0517922	0.0713816	0.116343	0.12966
	121.633	0.0504779	0.112551	0.0991541	0.0698794	0.050269	0.0158556	0.0607754	0.0318337	0.0614492	0.0993864	0.0442727	0.0374321	0.0967026	0.147681	0.0272631	0.0518633	0.0395555	0.108117	0.03369	0.0376043	0.0486696	0.0596299	0.0628748	0.0714077	0.0419119	0.05348	0.0725273	0.0112718	0.00906546	0.0218536	0.0729505	0.0393331	0.0220908	0.138909	0.167075	0.137526	0.0989491	0.134037	0.0751009	0.0620694	0.0554706	0.127	0.0475374	0.105242	0.0489362	0.0687059	0.114131	0.126944
	122.041	0.050816	0.111141	0.0961978	0.0671647	0.0472771	0.0154203	0.0597726	0.0297799	0.0583121	0.0969989	0.0432098	0.0353299	0.0935222	0.14474	0.0292046	0.0506011	0.0376494	0.105044	0.0326205	0.0366203	0.0478765	0.0567512	0.0608991	0.0693337	0.0401779	0.0522124	0.0734242	0.00973495	0.00575717	0.0210775	0.0702657	0.0375308	0.0208983	0.136151	0.160927	0.133137	0.0973677	0.128272	0.0716211	0.0590474	0.0548105	0.122573	0.0451471	0.101296	0.0461408	0.0661385	0.111936	0.124102
	122.449	0.0510877	0.109528	0.0932928	0.0644534	0.0443265	0.0150358	0.0587016	0.0277397	0.0552808	0.0947135	0.0420748	0.0332903	0.0902958	0.141582	0.0310388	0.0492289	0.0357695	0.10177	0.0315251	0.0357827	0.0470563	0.0539751	0.0589348	0.0672551	0.0384776	0.0508962	0.0741449	0.00833847	0.00259911	0.0203584	0.0676539	0.0356559	0.0197206	0.133388	0.154688	0.128676	0.0956884	0.122495	0.0681954	0.0560601	0.0540182	0.118029	0.0427885	0.0974129	0.0434188	0.0636722	0.109743	0.121146
	122.857	0.0512918	0.107705	0.0904536	0.0617536	0.0414277	0.0147002	0.0575466	0.0257238	0.0523632	0.0925329	0.0408761	0.0313149	0.0870424	0.138255	0.0327491	0.0477598	0.0339218	0.0983124	0.0304086	0.0350833	0.046219	0.0513029	0.0569856	0.0651872	0.0368162	0.0495328	0.0746912	0.00708277	0.00042039	0.0196946	0.0651271	0.0337368	0.0185625	0.130624	0.148374	0.12415	0.0939291	0.11672	0.0648346	0.0531175	0.0530936	0.113377	0.0404664	0.0936053	0.0407747	0.0613077	0.10758	0.118085
	123.265	0.0513976	0.105671	0.0876959	0.0590778	0.0385948	0.0143954	0.056314	0.0237379	0.049552	0.0903867	0.0396161	0.0294045	0.0837823	0.13478	0.0343086	0.046205	0.0321188	0.0947006	0.0292764	0.034519	0.045374	0.0487332	0.0550347	0.0631242	0.0351963	0.0481305	0.0750523	0.00596937	0.00323922	0.0190849	0.0626789	0.0317726	0.0174318	0.127858	0.142037	0.119566	0.0920967	0.110955	0.0615358	0.0502224	0.0520377	0.108638	0.0381916	0.0898882	0.0382205	0.05904	0.105421	0.11493
	123.674	0.0513987	0.103423	0.0850421	0.0564236	0.0358237	0.0141209	0.0549893	0.0217939	0.0468629	0.0882919	0.0383016	0.0275593	0.0805127	0.131166	0.0356977	0.0445633	0.030358	0.0909498	0.0281272	0.0340556	0.0445314	0.046261	0.0530952	0.0610593	0.0336199	0.0466793	0.0752194	0.00499893	0.00589104	0.0185238	0.0603173	0.0297845	0.0163376	0.125084	0.135642	0.114926	0.0901961	0.105245	0.0583219	0.0473817	0.0508528	0.103845	0.0359575	0.0862686	0.0357618	0.0568727	0.103287	0.111699
	124.082	0.0513061	0.100975	0.0824951	0.0538045	0.0331372	0.0138623	0.0535849	0.0199027	0.0442821	0.0861833	0.0369347	0.0257793	0.0772572	0.127391	0.0369017	0.042858	0.0286494	0.0870928	0.0269686	0.0336956	0.0436874	0.0438846	0.0511466	0.0590099	0.0320873	0.0451773	0.0751791	0.00417529	0.00836404	0.0180057	0.0580494	0.027788	0.0152867	0.122282	0.129268	0.110236	0.0882204	0.0995755	0.0551793	0.0446009	0.049548	0.0990005	0.0337807	0.0827487	0.0334057	0.0548054	0.101161	0.108397
	124.49	0.0511013	0.0983361	0.0800632	0.0512106	0.0305276	0.0136173	0.0521035	0.0180725	0.0418214	0.0840633	0.0355197	0.024064	0.0739987	0.123418	0.0379065	0.0410821	0.0269875	0.0831487	0.0257958	0.0333972	0.0428468	0.0415966	0.0492003	0.0569514	0.0305972	0.0436137	0.0749163	0.00350261	0.0106456	0.0175224	0.0558682	0.0257925	0.0142931	0.119441	0.122878	0.105497	0.0861575	0.0939954	0.0521283	0.0418823	0.0481324	0.0941501	0.0316548	0.0793275	0.0311601	0.0528376	0.0990388	0.105041
	124.898	0.0508193	0.095533	0.0777256	0.0486455	0.0280111	0.0133868	0.0505535	0.016316	0.0394712	0.0819142	0.0340623	0.0224133	0.0707462	0.119202	0.0387144	0.0392553	0.0253736	0.079144	0.0246132	0.0331577	0.0419993	0.0393961	0.0472531	0.0549091	0.029149	0.0419787	0.074426	0.00298466	0.01274	0.0170655	0.053785	0.023835	0.0133642	0.116534	0.116523	0.100721	0.0839955	0.0884914	0.0491589	0.0392337	0.0466219	0.0892889	0.0295888	0.075997	0.0290264	0.0509705	0.0969245	0.101635
	125.306	0.050434	0.0925835	0.0754597	0.0461029	0.025592	0.0131641	0.0489563	0.0146365	0.0372293	0.0797029	0.0325668	0.020827	0.0674897	0.114699	0.0393225	0.0373814	0.0238071	0.0751045	0.0234195	0.0329509	0.0411432	0.0372791	0.0453033	0.0528631	0.0277407	0.0402752	0.0737004	0.00262076	0.0146404	0.0166283	0.0517806	0.0219251	0.0125141	0.113554	0.110215	0.0959163	0.0817199	0.0830831	0.046273	0.0366553	0.0450313	0.0844494	0.0275885	0.0727532	0.0270134	0.0491956	0.0947857	0.0981844
	125.714	0.0499628	0.0895077	0.0732266	0.0435742	0.0232687	0.0129612	0.0473098	0.0130437	0.0350981	0.077466	0.0310436	0.0193054	0.0642191	0.109893	0.039741	0.035464	0.0222809	0.0710457	0.0222128	0.0327581	0.0402732	0.0352446	0.0433711	0.0508221	0.0263725	0.0384987	0.0727488	0.002396	0.0163456	0.0162036	0.0498556	0.0201135	0.0117507	0.110488	0.103939	0.0910983	0.0793301	0.0777849	0.0434765	0.0341542	0.0433752	0.0796415	0.0256479	0.0695884	0.0251193	0.0475091	0.0926451	0.0946961
	126.123	0.049387	0.0863239	0.0709781	0.041066	0.0210607	0.0127676	0.0456374	0.0115397	0.0330599	0.0751441	0.0294995	0.0178491	0.0609473	0.104784	0.0399744	0.0335249	0.0208025	0.066995	0.0209998	0.0325788	0.0393851	0.0332938	0.0414414	0.0487919	0.0250441	0.0366676	0.0715808	0.00228138	0.0178562	0.0157895	0.0479937	0.0184278	0.0110817	0.107337	0.0977718	0.0862855	0.0768289	0.0725753	0.0407508	0.0317318	0.0416671	0.0748666	0.0237841	0.0665025	0.0233502	0.0458965	0.0904644	0.0911698
	126.531	0.048679	0.0830351	0.0686772	0.0385667	0.0189542	0.0125886	0.0439301	0.0101293	0.0311273	0.0727885	0.0279463	0.0164586	0.0576595	0.0994172	0.0400258	0.0315557	0.0193639	0.0629609	0.0197764	0.0323779	0.0384848	0.0314241	0.0395403	0.0467545	0.0237567	0.0347937	0.0702146	0.00223781	0.0191626	0.0153833	0.0461794	0.0169199	0.0105122	0.104111	0.0916527	0.0814957	0.0742343	0.0674997	0.0381166	0.0293917	0.0399137	0.0701591	0.0219847	0.0634971	0.0217051	0.0443466	0.0882614	0.0876171
	126.939	0.0478419	0.0796509	0.0662769	0.0360941	0.0169709	0.0124146	0.0421935	0.00881951	0.0292777	0.0703514	0.026393	0.0151345	0.0543863	0.0938598	0.0398983	0.0295852	0.017976	0.0589648	0.0185539	0.0321687	0.03757	0.0296386	0.0376532	0.0447388	0.0225124	0.0328993	0.0686732	0.00222762	0.0202705	0.0149867	0.0444127	0.0156425	0.010039	0.100819	0.0856699	0.0767505	0.0715707	0.0625219	0.0355494	0.0271385	0.0381214	0.0654995	0.0202624	0.060578	0.0201839	0.0428458	0.0860214	0.0840385
	127.347	0.0468195	0.0761629	0.0637641	0.0336481	0.0151024	0.0122315	0.0404231	0.00761409	0.0275221	0.0678419	0.0248479	0.013877	0.0511289	0.0881994	0.0395816	0.0276111	0.0166382	0.0550165	0.0173331	0.0319133	0.0366535	0.0279321	0.0357857	0.0427162	0.021312	0.0310092	0.0669716	0.00222427	0.0211682	0.0146015	0.0426726	0.0146329	0.0096604	0.097487	0.0797912	0.0720642	0.0688635	0.057689	0.0330697	0.0249718	0.0362898	0.0609326	0.018615	0.0577563	0.0187877	0.041379	0.0837369	0.0804502
	127.755	0.0456354	0.0725735	0.0611232	0.0312452	0.0133544	0.0120358	0.0386026	0.00652833	0.0258479	0.0652632	0.0233194	0.0126858	0.0479133	0.0825335	0.039073	0.0256485	0.0153559	0.0511279	0.0161222	0.0316139	0.0357357	0.0263031	0.0339399	0.0407138	0.0201579	0.029136	0.0651315	0.00221027	0.021862	0.0142286	0.0409735	0.0139468	0.00936242	0.0941198	0.0740426	0.0674524	0.0661415	0.0529948	0.0306688	0.0228978	0.0344197	0.0564489	0.0170373	0.0550387	0.0175095	0.0399404	0.081428	0.0768615
	128.163	0.0442544	0.0688811	0.0583716	0.028903	0.0117374	0.0118015	0.0367422	0.00557097	0.0242516	0.062559	0.0218098	0.01156	0.0447639	0.0769357	0.0383593	0.0237161	0.0141382	0.0473158	0.0149305	0.0312497	0.0348235	0.0247455	0.0320923	0.0387217	0.0190488	0.0273037	0.0631573	0.00217859	0.0223494	0.0138701	0.0393067	0.0135797	0.0091345	0.0907353	0.0684736	0.062924	0.0634171	0.0484493	0.0283484	0.0209147	0.0325124	0.0520744	0.0155438	0.0524359	0.0163503	0.0385187	0.0790621	0.0732864
	128.571	0.0427011	0.0650918	0.0555368	0.026624	0.0102361	0.0115323	0.0348217	0.0047635	0.0227392	0.0597879	0.0203248	0.0104981	0.0416823	0.0714618	0.0374381	0.0218064	0.0129794	0.0435857	0.0137575	0.0307959	0.0339169	0.0232507	0.0302642	0.0367383	0.017984	0.0255125	0.0610564	0.00212787	0.0226339	0.0135224	0.0376829	0.013543	0.00895758	0.0873289	0.0630241	0.058485	0.0606994	0.0440989	0.026127	0.0190265	0.0305709	0.0478358	0.0141161	0.0499472	0.0152983	0.037116	0.0766755	0.0697431
	128.98	0.0410012	0.0612259	0.0526508	0.0244334	0.0088753	0.011212	0.032863	0.00412004	0.0212888	0.0568685	0.0188638	0.00949816	0.0387005	0.0661155	0.036311	0.0199519	0.0118915	0.0399591	0.0126172	0.0302599	0.0330074	0.0218141	0.0284241	0.0347877	0.0169598	0.0237738	0.0588276	0.00206006	0.0227287	0.013183	0.036113	0.0137761	0.00881398	0.083893	0.0578038	0.0541422	0.0579793	0.0399049	0.0239816	0.0172333	0.0286058	0.0437222	0.0127715	0.0475708	0.0143503	0.0357305	0.0742339	0.0662378
	129.388	0.0391567	0.0573024	0.0497643	0.022319	0.00763307	0.0108448	0.030867	0.00365367	0.0199194	0.0538705	0.0174303	0.0085581	0.0357958	0.0608676	0.0349854	0.0181374	0.0108608	0.036441	0.011503	0.0296007	0.0320903	0.0204244	0.0265951	0.0328394	0.0159713	0.0220871	0.0564661	0.00198111	0.0226344	0.012844	0.0345882	0.0142344	0.00868716	0.0804154	0.0527253	0.0498979	0.0552405	0.0359387	0.0219467	0.0155343	0.0266287	0.0397892	0.0114999	0.0452951	0.0134936	0.0343659	0.0717552	0.0627893
	129.796	0.0372445	0.0533606	0.0468942	0.0202933	0.00652828	0.0104403	0.0288528	0.0033625	0.0186005	0.0507663	0.0160268	0.00767609	0.0329807	0.0556567	0.0334854	0.0163837	0.00989035	0.0330491	0.0104234	0.0288445	0.0311445	0.0190802	0.0247722	0.0309336	0.0150141	0.0204523	0.0539782	0.00189592	0.0223746	0.0124975	0.0331255	0.0148429	0.00855786	0.0768685	0.0478669	0.0457629	0.0524668	0.0321483	0.0199899	0.0139321	0.0246587	0.0360031	0.0102999	0.0431019	0.0127177	0.0330276	0.0692326	0.0593964
	130.204	0.0352393	0.0494294	0.0440707	0.0183428	0.00555427	0.00999427	0.0268515	0.00322018	0.0173459	0.0475724	0.0146568	0.00685026	0.0302314	0.0504041	0.0318311	0.0146944	0.00896878	0.0297916	0.00937613	0.0279663	0.0301611	0.0177754	0.0229558	0.0290415	0.0140818	0.0188815	0.0513626	0.00181225	0.0219508	0.0121351	0.0316995	0.0155327	0.00841716	0.0732464	0.0432136	0.0417457	0.0496385	0.0285667	0.0181331	0.0124219	0.0227137	0.0324081	0.00918481	0.040974	0.012013	0.0317128	0.066645	0.0560684
	130.612	0.0332074	0.0455465	0.0412748	0.0164548	0.00470573	0.00953432	0.0248649	0.00319147	0.0161362	0.0443642	0.013329	0.00607943	0.027526	0.0450557	0.030057	0.0130589	0.00808381	0.0266748	0.00835723	0.0269855	0.0291209	0.0165109	0.021181	0.0271822	0.0131717	0.0173737	0.0486412	0.00173626	0.0213826	0.0117479	0.0303113	0.0162589	0.00825108	0.0695275	0.0387282	0.037863	0.0467566	0.0251889	0.0163626	0.011007	0.020811	0.0289871	0.00813114	0.0388866	0.0113621	0.0304258	0.0640223	0.0528047
	131.02	0.0311212	0.0417364	0.0384835	0.0146314	0.00400062	0.00904698	0.0229348	0.00322513	0.0149613	0.0410785	0.0120482	0.00536272	0.0248656	0.0395705	0.0281865	0.0115085	0.007236	0.0237086	0.00737605	0.0259193	0.0280167	0.0152898	0.0194196	0.0253627	0.0122801	0.0159546	0.0458314	0.00167443	0.0206772	0.0113327	0.0289409	0.0169503	0.00805807	0.0657244	0.0345151	0.0341331	0.0438258	0.021964	0.0146623	0.00968192	0.0189651	0.0257309	0.00716272	0.036827	0.0107598	0.0291555	0.0613193	0.0496013
	131.429	0.0289721	0.0380118	0.0356549	0.0128435	0.00340625	0.0085497	0.0210462	0.00329076	0.0138278	0.0378552	0.0108256	0.00469933	0.0222098	0.0339745	0.0262425	0.0100133	0.00640279	0.020888	0.00642087	0.02476	0.0268461	0.0141122	0.0177199	0.0235597	0.0114081	0.0146316	0.042965	0.00163243	0.0198379	0.0108856	0.0275654	0.0175966	0.00783414	0.0618485	0.0304354	0.0305729	0.0408737	0.0189638	0.0130563	0.00844752	0.0171807	0.0226715	0.00625835	0.0347807	0.010187	0.0278971	0.0585803	0.0464655
	131.837	0.0267701	0.0343801	0.0327263	0.0111131	0.00295164	0.00803117	0.0192162	0.00335208	0.0126986	0.0346028	0.00966575	0.0040888	0.0195886	0.0283282	0.0242387	0.00860865	0.00559703	0.018221	0.00550881	0.0235595	0.0256088	0.0129864	0.0160501	0.0218188	0.0105572	0.0134294	0.0400779	0.00161226	0.0188805	0.0104104	0.0261898	0.0181402	0.0075802	0.0579289	0.0266422	0.0272035	0.0379364	0.0160803	0.0114926	0.00730137	0.0154596	0.0197442	0.00542043	0.0327471	0.00964085	0.0266385	0.0557779	0.0433879
	132.245	0.0244281	0.030826	0.0296749	0.00942104	0.00258672	0.00747556	0.0174318	0.00339559	0.0116038	0.031408	0.00857481	0.00352989	0.0169807	0.0227553	0.0221736	0.00728428	0.00480107	0.0156985	0.00463487	0.0222877	0.0243219	0.0119086	0.0144218	0.0200942	0.00973067	0.0123635	0.0371966	0.00161538	0.0177936	0.00991154	0.0247843	0.018583	0.00730102	0.0540128	0.0230241	0.0240336	0.0350503	0.0134144	0.0100226	0.00624011	0.0137938	0.0170184	0.004659	0.0307318	0.00910772	0.0253672	0.0529336	0.0403832
	132.653	0.0220114	0.0273427	0.0264509	0.00779342	0.0023234	0.00689037	0.0156665	0.00340251	0.0104992	0.0282597	0.00755441	0.00302132	0.0144223	0.0174281	0.0200497	0.00604033	0.004029	0.0133256	0.00380995	0.020989	0.0229919	0.0108819	0.0128407	0.0184314	0.00893405	0.0114398	0.0343578	0.00163728	0.0165992	0.00939633	0.0233732	0.0189015	0.00699406	0.0501287	0.0196271	0.0210733	0.0322575	0.0109041	0.00859553	0.00526587	0.0121742	0.0144285	0.00394045	0.0287446	0.00858269	0.0240801	0.0500705	0.0374484
	133.061	0.0194281	0.0239099	0.0230843	0.00624831	0.00211688	0.0062341	0.0139323	0.00336091	0.00941435	0.0250837	0.00660043	0.00256083	0.0119458	0.0125484	0.0178544	0.00491648	0.0032851	0.011098	0.00304949	0.0196418	0.0216412	0.00989963	0.0112557	0.0168118	0.00816929	0.0106724	0.03157	0.00167411	0.0152888	0.00887455	0.0219488	0.0190835	0.00666547	0.0463307	0.016524	0.0183201	0.0295724	0.0085656	0.00724693	0.00437181	0.0105928	0.0120199	0.0033013	0.0268061	0.00806359	0.0227676	0.0471677	0.0345963
	133.469	0.0167616	0.0205262	0.0195904	0.00479075	0.00194293	0.00553632	0.0121786	0.00326683	0.00833476	0.0220265	0.00571168	0.0021456	0.0095626	0.00841026	0.0155929	0.00386704	0.00256903	0.0090201	0.00234618	0.0182398	0.0202754	0.00895291	0.00972669	0.015232	0.00744067	0.01004	0.028849	0.00171856	0.013883	0.00835086	0.0205271	0.0191475	0.006308	0.042627	0.0135375	0.0157667	0.0270047	0.00650392	0.0059831	0.00356322	0.00904232	0.00980692	0.00270424	0.0249252	0.00754059	0.021439	0.0442901	0.0318376
Figure 4-figure supplement 2A (F3)	Distance(nm)	ACF1	ACF2	ACF3	ACF4	ACF5	ACF6	ACF7	ACF8	ACF9	ACF10	ACF11	ACF12	ACF13	ACF14	ACF15	ACF16	ACF17	ACF18	ACF19	ACF20	ACF21	ACF22	ACF23	ACF24	ACF25	ACF26	ACF27	ACF28	ACF29	ACF30	ACF31	ACF32	ACF33	ACF34	ACF35	ACF36	ACF37	ACF38	ACF39	ACF40	ACF41	ACF42	ACF43	ACF44	ACF45	ACF46	ACF47	ACF48
	0	1	1.00001	1.00001	1.00004	1	1	1.00004	1.00003	1	1.00005	1	1.00002	1	1.00002	1	1.00006	1.00004	1	1	1	1	1.00002	1.00002	1.00002	1.00006	1.00002	1	1.00001	1	1	1	1.00001	1	1	1	1.00001	1	1	1.00001	1.00005	1.00001	1	1.00006	1	1	1	1.00003	1.00002
	0.408163	0.998348	0.997974	0.998727	0.997306	0.998996	0.998951	0.998189	0.997634	0.998285	0.99886	0.998963	0.998141	0.999192	0.999288	0.998131	0.998509	0.998894	0.998449	0.999105	0.99857	0.999332	0.997989	0.998805	0.998131	0.997972	0.998719	0.998646	0.999212	0.998438	0.99891	0.997944	0.998604	0.998533	0.998375	0.999008	0.998233	0.998928	0.998301	0.998305	0.998914	0.998743	0.998451	0.999033	0.999257	0.998958	0.999374	0.999221	0.998991
	0.816327	0.994578	0.994621	0.99664	0.992832	0.997114	0.996187	0.993948	0.992734	0.9952	0.995443	0.996794	0.994646	0.997075	0.997518	0.993619	0.994443	0.996047	0.995359	0.996838	0.995449	0.997806	0.993138	0.995957	0.995025	0.993827	0.995344	0.995255	0.997256	0.995688	0.996957	0.993493	0.995532	0.995114	0.995145	0.99649	0.994537	0.996491	0.995601	0.995668	0.995922	0.9965	0.995747	0.996374	0.997324	0.996231	0.997677	0.997024	0.99631
	1.22449	0.989234	0.990741	0.994229	0.987764	0.994672	0.991965	0.988036	0.986189	0.991368	0.990073	0.99383	0.990154	0.993821	0.99492	0.986939	0.988313	0.991882	0.991182	0.993382	0.991	0.995615	0.985919	0.991803	0.991413	0.988397	0.990249	0.990232	0.994396	0.992273	0.994511	0.98719	0.991202	0.990241	0.990806	0.992617	0.989427	0.992949	0.992575	0.992785	0.991384	0.993783	0.992446	0.992403	0.994309	0.991967	0.994979	0.993621	0.992154
	1.63265	0.982131	0.985344	0.99084	0.980802	0.991254	0.986343	0.9804	0.977395	0.986083	0.982987	0.989802	0.983888	0.989416	0.991447	0.977874	0.980269	0.986448	0.98533	0.988665	0.984824	0.992662	0.975997	0.986173	0.986348	0.981086	0.983491	0.983608	0.990634	0.98744	0.991092	0.978409	0.985279	0.983821	0.98472	0.987279	0.982313	0.988047	0.988271	0.9887	0.985377	0.990055	0.987808	0.987229	0.990116	0.986042	0.991231	0.989074	0.986457
	2.04082	0.973839	0.979341	0.987034	0.973216	0.987238	0.979584	0.971747	0.967281	0.980048	0.974442	0.985084	0.976581	0.984032	0.987317	0.966929	0.970753	0.98012	0.978339	0.982877	0.977343	0.989158	0.963901	0.979423	0.980658	0.972736	0.975428	0.975798	0.986229	0.981821	0.98713	0.967774	0.97821	0.976351	0.977448	0.980685	0.973761	0.982063	0.983446	0.984197	0.978199	0.985867	0.982471	0.981157	0.984869	0.978627	0.986517	0.983567	0.979415
	2.44898	0.964386	0.972266	0.982495	0.964415	0.982436	0.971807	0.962216	0.955667	0.972955	0.964679	0.979596	0.967901	0.977709	0.982557	0.954116	0.959994	0.973032	0.969968	0.976024	0.96841	0.985096	0.94958	0.971541	0.973892	0.963166	0.966205	0.966934	0.981253	0.975066	0.982393	0.955054	0.969884	0.967892	0.968725	0.972833	0.963533	0.9749	0.977648	0.978824	0.969984	0.98099	0.976089	0.974339	0.978541	0.9697	0.980836	0.977194	0.971042
	2.85714	0.954104	0.964503	0.977455	0.954947	0.977023	0.963204	0.952239	0.943034	0.965113	0.953926	0.973533	0.958178	0.970554	0.977305	0.939718	0.948303	0.965432	0.96046	0.968216	0.958236	0.980596	0.933333	0.962729	0.966379	0.952778	0.956076	0.957293	0.975876	0.967452	0.977073	0.940519	0.960526	0.958743	0.958772	0.963861	0.951862	0.966685	0.971151	0.972878	0.96094	0.975668	0.96892	0.966994	0.971203	0.959357	0.974246	0.970094	0.961453
	3.26531	0.943171	0.956103	0.971932	0.944917	0.971042	0.953909	0.942052	0.929566	0.956592	0.94237	0.966987	0.947504	0.962637	0.971636	0.923926	0.935898	0.957473	0.949909	0.959518	0.946924	0.975721	0.915359	0.953103	0.958158	0.941741	0.945211	0.947043	0.9702	0.959031	0.971189	0.9243	0.950225	0.949064	0.947679	0.953863	0.93885	0.957477	0.964001	0.966403	0.951205	0.969961	0.961007	0.959272	0.962895	0.947667	0.96679	0.962368	0.95072
	3.67347	0.931655	0.946992	0.965881	0.934248	0.964498	0.944011	0.931745	0.915299	0.947359	0.930141	0.959989	0.935868	0.953993	0.96559	0.906814	0.922895	0.949229	0.938327	0.949961	0.934521	0.970499	0.895762	0.942713	0.949133	0.930043	0.933714	0.936268	0.964279	0.949786	0.964721	0.906379	0.938998	0.938919	0.935405	0.942911	0.924465	0.947282	0.956096	0.959302	0.940858	0.963844	0.95229	0.951259	0.953641	0.934667	0.958504	0.95408	0.93887
	4.08163	0.91975	0.937491	0.959505	0.923402	0.957563	0.933608	0.921489	0.900552	0.937672	0.917326	0.952704	0.923586	0.944681	0.959243	0.888621	0.909417	0.940791	0.925991	0.939624	0.921265	0.96501	0.874852	0.931712	0.939591	0.917971	0.921706	0.925073	0.958188	0.939997	0.957832	0.887052	0.927019	0.928452	0.922212	0.931149	0.908969	0.936237	0.947744	0.95188	0.929985	0.957519	0.943015	0.943045	0.943519	0.920469	0.949455	0.945302	0.925987
	4.4898	0.907377	0.927348	0.952653	0.912059	0.950185	0.92271	0.911146	0.885144	0.927358	0.90396	0.945096	0.910526	0.934693	0.952575	0.869345	0.89544	0.932107	0.912848	0.928498	0.907159	0.959234	0.852681	0.920081	0.929284	0.905333	0.909179	0.913401	0.951897	0.929547	0.950419	0.866228	0.914218	0.917578	0.907998	0.918625	0.892266	0.924317	0.93874	0.943918	0.918571	0.950852	0.933016	0.934616	0.93254	0.905096	0.939673	0.936045	0.91206
	4.89796	0.894656	0.916865	0.945528	0.900644	0.942544	0.91137	0.900746	0.869317	0.916649	0.890059	0.937307	0.896995	0.924065	0.945634	0.849181	0.880996	0.923188	0.899179	0.916647	0.892445	0.953229	0.829554	0.907942	0.918475	0.892331	0.896186	0.901272	0.945434	0.918727	0.942646	0.844168	0.900741	0.90636	0.893002	0.905485	0.874589	0.91165	0.929371	0.935703	0.906645	0.944021	0.922524	0.925997	0.920784	0.888658	0.92923	0.926346	0.897147
	5.30612	0.88153	0.905893	0.938045	0.888973	0.934633	0.89959	0.890125	0.852947	0.905444	0.87562	0.929337	0.882959	0.912793	0.9384	0.828198	0.86605	0.913961	0.885021	0.904079	0.87719	0.946981	0.805616	0.895305	0.907018	0.878851	0.882705	0.888603	0.938755	0.907505	0.934456	0.820897	0.886558	0.894709	0.877226	0.891805	0.855948	0.898257	0.919562	0.927137	0.894183	0.936949	0.911462	0.917156	0.908284	0.871212	0.91817	0.916211	0.881262
	5.71429	0.868045	0.894548	0.930289	0.877211	0.926562	0.887403	0.879223	0.836128	0.893833	0.860658	0.92126	0.868583	0.900899	0.930894	0.806539	0.850622	0.9044	0.87055	0.890834	0.86156	0.940516	0.78112	0.882245	0.895	0.864948	0.868761	0.875371	0.931858	0.896039	0.925928	0.79656	0.871748	0.882619	0.860787	0.877708	0.836458	0.884214	0.909419	0.918324	0.881197	0.929701	0.899923	0.908094	0.895103	0.852848	0.906558	0.90567	0.864442
	6.12245	0.854273	0.882907	0.922314	0.86547	0.918413	0.874859	0.868006	0.818949	0.881882	0.84521	0.913158	0.854017	0.888421	0.923144	0.784407	0.834773	0.894503	0.855943	0.876971	0.845719	0.933867	0.756365	0.868852	0.882485	0.85071	0.854399	0.861575	0.924749	0.88445	0.917105	0.771358	0.856387	0.870102	0.843843	0.863317	0.816281	0.869612	0.899062	0.90937	0.867724	0.922331	0.887993	0.898832	0.881307	0.833668	0.894458	0.894761	0.846749
	6.53061	0.840246	0.870915	0.914087	0.853678	0.910217	0.862013	0.856427	0.801418	0.869554	0.829347	0.905059	0.839295	0.875392	0.915169	0.761947	0.818584	0.88427	0.84128	0.862529	0.829758	0.927045	0.731583	0.855183	0.8694	0.836108	0.839673	0.847219	0.917429	0.87276	0.907981	0.745361	0.840507	0.857151	0.826416	0.848739	0.795451	0.854487	0.888433	0.900216	0.853809	0.914809	0.875642	0.889399	0.866947	0.813753	0.881927	0.883535	0.828227
	6.93878	0.826156	0.858811	0.905757	0.842153	0.902117	0.848975	0.844612	0.783806	0.857037	0.81318	0.897099	0.824687	0.861891	0.907044	0.739461	0.802229	0.873786	0.826816	0.847607	0.813891	0.920122	0.707178	0.841395	0.855954	0.821382	0.824718	0.83241	0.909964	0.861183	0.898674	0.718881	0.824274	0.84389	0.808745	0.834133	0.774213	0.838971	0.877755	0.891085	0.839564	0.90728	0.863062	0.879883	0.852114	0.793237	0.869046	0.872076	0.808976
	7.34694	0.812083	0.846504	0.89726	0.830764	0.894112	0.835836	0.832598	0.766145	0.844272	0.796845	0.889305	0.810194	0.847979	0.898809	0.717146	0.785865	0.863105	0.812607	0.832267	0.798183	0.913122	0.683415	0.827558	0.842045	0.80653	0.809642	0.81722	0.902387	0.849688	0.889144	0.69202	0.807727	0.830365	0.790859	0.819604	0.752611	0.823104	0.866941	0.881885	0.825084	0.899701	0.8502	0.870358	0.836861	0.772211	0.855873	0.860463	0.789062
	7.7551	0.798246	0.834233	0.888737	0.819816	0.886337	0.822733	0.820581	0.748741	0.831447	0.780504	0.881806	0.796073	0.833752	0.890556	0.695311	0.769712	0.852352	0.798887	0.816621	0.782822	0.906127	0.660703	0.813837	0.827873	0.791788	0.794625	0.801811	0.894787	0.838469	0.879513	0.665083	0.791046	0.816746	0.772969	0.805308	0.730868	0.80701	0.85617	0.872807	0.810514	0.892208	0.837234	0.860943	0.821279	0.750813	0.842487	0.848804	0.768588
	8.16327	0.78478	0.821997	0.880175	0.809283	0.878815	0.809778	0.808673	0.731715	0.818574	0.764323	0.874657	0.782386	0.819293	0.882349	0.674209	0.753959	0.841617	0.785756	0.800756	0.767895	0.899181	0.639355	0.800331	0.813428	0.777242	0.779814	0.786308	0.88722	0.827534	0.869774	0.638276	0.774321	0.803137	0.755185	0.791361	0.709109	0.790765	0.845445	0.863847	0.795977	0.884812	0.824187	0.851734	0.805441	0.72916	0.828954	0.83719	0.747641
	8.57143	0.771839	0.809912	0.871636	0.799288	0.871618	0.797083	0.797014	0.715265	0.805742	0.748459	0.867927	0.769271	0.804688	0.874258	0.654083	0.738779	0.83099	0.773354	0.784768	0.753507	0.892342	0.619692	0.787154	0.798792	0.763	0.765365	0.770852	0.879751	0.816971	0.859989	0.611834	0.75768	0.789669	0.73763	0.777886	0.687472	0.774456	0.834817	0.855067	0.781597	0.877569	0.811141	0.842821	0.789422	0.707371	0.815345	0.825713	0.726302
	8.97959	0.75957	0.7981	0.863186	0.789955	0.86481	0.784749	0.785729	0.699579	0.79305	0.73305	0.861692	0.756869	0.790026	0.866349	0.635197	0.724329	0.820547	0.761832	0.76876	0.739771	0.885665	0.60203	0.774418	0.784076	0.749203	0.751417	0.755569	0.872433	0.806862	0.85021	0.586063	0.741255	0.776465	0.720492	0.764999	0.666161	0.758197	0.824405	0.846579	0.767483	0.870551	0.798211	0.83428	0.773309	0.685585	0.801729	0.814456	0.704661
	9.38776	0.748021	0.786537	0.854801	0.781204	0.858395	0.772833	0.774833	0.6847	0.780482	0.718203	0.855953	0.745189	0.775368	0.858654	0.617706	0.710688	0.810306	0.751228	0.752802	0.726707	0.879172	0.586558	0.762169	0.769243	0.735822	0.738058	0.740528	0.865281	0.797183	0.840429	0.561141	0.725109	0.763571	0.703826	0.752779	0.645246	0.742046	0.814158	0.838329	0.753705	0.863726	0.785391	0.826138	0.757167	0.663907	0.788163	0.803472	0.682772
	9.79592	0.737296	0.775401	0.846585	0.773219	0.85245	0.761395	0.764387	0.670804	0.768165	0.703998	0.85077	0.734388	0.760792	0.851221	0.601819	0.697939	0.800293	0.741693	0.736994	0.714414	0.872908	0.573508	0.750494	0.754458	0.722975	0.725378	0.725808	0.858316	0.788046	0.830729	0.537413	0.709383	0.751076	0.687833	0.741321	0.624945	0.726124	0.804237	0.830472	0.740334	0.857179	0.772831	0.81842	0.741085	0.642479	0.774716	0.792814	0.660715
	10.2041	0.727371	0.764614	0.838484	0.76583	0.846945	0.750442	0.754312	0.657832	0.756039	0.690478	0.846107	0.724411	0.746346	0.844052	0.587618	0.686086	0.790466	0.733211	0.721397	0.702863	0.866869	0.562926	0.739398	0.739655	0.710574	0.713397	0.711416	0.851509	0.779374	0.821069	0.515063	0.694103	0.738962	0.672561	0.730666	0.605326	0.710488	0.794583	0.82293	0.727395	0.850847	0.760502	0.811101	0.725121	0.621405	0.761435	0.782501	0.638537
	10.6122	0.718271	0.754309	0.830574	0.759149	0.841928	0.739989	0.744581	0.64587	0.744188	0.677668	0.841976	0.715351	0.732092	0.837167	0.575203	0.675141	0.780799	0.725861	0.706092	0.692093	0.861076	0.554873	0.72892	0.724957	0.698653	0.702143	0.697378	0.844847	0.771238	0.811516	0.494397	0.679379	0.727257	0.658152	0.72087	0.586553	0.69524	0.785298	0.815802	0.714922	0.844772	0.748517	0.804156	0.709358	0.600814	0.748377	0.772554	0.616305
	11.0204	0.709959	0.744456	0.822833	0.753061	0.837369	0.730021	0.735107	0.634853	0.732582	0.665572	0.838339	0.707163	0.718082	0.830561	0.564608	0.665084	0.771241	0.719622	0.69115	0.682067	0.855524	0.549267	0.719057	0.710361	0.687164	0.691603	0.683682	0.838292	0.763579	0.802046	0.475645	0.665251	0.715936	0.644689	0.711948	0.568735	0.680458	0.776392	0.809072	0.702929	0.838919	0.736888	0.797543	0.693861	0.580824	0.735586	0.762978	0.594079
	11.4286	0.702397	0.735079	0.81527	0.747528	0.833262	0.720523	0.725814	0.624753	0.721225	0.654188	0.835156	0.69983	0.70437	0.824232	0.555807	0.655891	0.761748	0.714466	0.676638	0.672741	0.85021	0.545967	0.709801	0.695901	0.676054	0.681763	0.670327	0.831812	0.756377	0.792674	0.459021	0.651776	0.704979	0.632229	0.703909	0.551957	0.666214	0.767864	0.802731	0.691436	0.833265	0.725649	0.79122	0.678695	0.561544	0.723103	0.753779	0.571921
	11.8367	0.695574	0.726239	0.807918	0.742555	0.829599	0.711485	0.716677	0.615556	0.710154	0.643512	0.832407	0.693352	0.691025	0.818187	0.548779	0.647559	0.752299	0.710378	0.66264	0.664083	0.845141	0.544785	0.70116	0.681669	0.665354	0.672609	0.657329	0.825387	0.749624	0.783419	0.444769	0.63903	0.694394	0.620883	0.696755	0.53636	0.652604	0.759799	0.796839	0.680474	0.827827	0.714875	0.785161	0.663932	0.543101	0.710969	0.744963	0.549916
	12.2449	0.689422	0.717873	0.80073	0.737987	0.82632	0.702886	0.707634	0.607155	0.699313	0.633545	0.830021	0.687618	0.678101	0.812418	0.543394	0.64006	0.742866	0.707242	0.649219	0.655987	0.840303	0.545423	0.693098	0.667632	0.654977	0.664111	0.644691	0.81899	0.743222	0.774247	0.432986	0.627029	0.684154	0.61064	0.69045	0.521963	0.639678	0.752123	0.791312	0.670067	0.822541	0.704537	0.779335	0.649624	0.52559	0.69921	0.736534	0.528129
	12.6531	0.683952	0.710091	0.793768	0.733906	0.823428	0.694725	0.698731	0.599579	0.688779	0.624295	0.827985	0.682647	0.665678	0.806946	0.539563	0.633403	0.733469	0.705029	0.636464	0.648416	0.835715	0.547624	0.685627	0.653927	0.644989	0.656269	0.632469	0.812627	0.737189	0.765205	0.423837	0.615864	0.674303	0.601592	0.68498	0.508889	0.627536	0.744936	0.786231	0.660267	0.817453	0.694736	0.773743	0.635841	0.509131	0.687862	0.728508	0.506661
	13.0612	0.679104	0.702812	0.786972	0.73014	0.820842	0.686985	0.689959	0.592705	0.678494	0.615771	0.826227	0.678299	0.653817	0.801765	0.537095	0.627569	0.724107	0.703587	0.624435	0.641246	0.831367	0.551021	0.678706	0.640524	0.635331	0.649053	0.620687	0.806287	0.731405	0.756246	0.417297	0.605539	0.664834	0.593705	0.680287	0.497131	0.616222	0.73817	0.781508	0.651108	0.812503	0.685434	0.768375	0.62263	0.493807	0.676941	0.720888	0.48559
	13.4694	0.674871	0.696112	0.780383	0.726744	0.818545	0.679662	0.681382	0.586545	0.668516	0.607988	0.824719	0.674554	0.64259	0.796894	0.535819	0.622547	0.714807	0.702839	0.613206	0.634412	0.827272	0.555317	0.672326	0.627528	0.626027	0.642456	0.609406	0.799982	0.725867	0.747403	0.413362	0.596118	0.655792	0.587	0.67633	0.486731	0.605812	0.731865	0.777172	0.642637	0.807715	0.676696	0.763241	0.610044	0.479711	0.666466	0.713685	0.465011
	13.8775	0.671208	0.689957	0.773975	0.723626	0.81647	0.672738	0.673034	0.581008	0.658833	0.600954	0.823407	0.671305	0.632058	0.792333	0.535525	0.618307	0.705584	0.702649	0.602834	0.627814	0.823428	0.560169	0.666453	0.614962	0.617066	0.636451	0.598663	0.793712	0.720493	0.738654	0.411894	0.587608	0.647194	0.581451	0.673044	0.477678	0.596355	0.726015	0.773192	0.634884	0.803071	0.668521	0.758339	0.598127	0.466915	0.656451	0.706898	0.44502
	14.2857	0.668055	0.684334	0.767734	0.720733	0.814565	0.666185	0.664937	0.576031	0.649443	0.594668	0.82223	0.668461	0.622269	0.788077	0.535974	0.614788	0.696437	0.702882	0.593362	0.621356	0.81983	0.565261	0.66104	0.602852	0.608392	0.630998	0.588484	0.78747	0.715229	0.729993	0.412702	0.580015	0.639044	0.576992	0.670362	0.469915	0.587888	0.720579	0.769511	0.627864	0.798544	0.660903	0.753659	0.58691	0.455471	0.646896	0.700519	0.425698
	14.6939	0.665366	0.679265	0.761676	0.718073	0.812789	0.659972	0.657123	0.571561	0.640383	0.589115	0.821154	0.665965	0.613268	0.784124	0.536956	0.611922	0.687369	0.703438	0.584831	0.614975	0.816479	0.570316	0.656057	0.591276	0.600016	0.626052	0.578889	0.781253	0.710054	0.721431	0.415574	0.573348	0.631358	0.573603	0.66822	0.463417	0.580463	0.715608	0.766155	0.621588	0.794152	0.653881	0.749191	0.576429	0.445426	0.637809	0.694531	0.407151
	15.102	0.663027	0.674654	0.755739	0.715498	0.811058	0.654038	0.649544	0.567453	0.631598	0.584262	0.820091	0.663674	0.605077	0.780443	0.538199	0.609593	0.678339	0.704147	0.577248	0.608564	0.813347	0.575032	0.651425	0.580192	0.591821	0.621529	0.569847	0.775027	0.704874	0.712925	0.420186	0.567553	0.624088	0.57116	0.666532	0.458051	0.574079	0.711017	0.763014	0.616029	0.789829	0.647395	0.744895	0.566696	0.43679	0.629177	0.688898	0.389461
	15.5102	0.660967	0.670542	0.749956	0.713057	0.809351	0.648333	0.642191	0.563661	0.623139	0.580061	0.819006	0.661559	0.597718	0.777019	0.539495	0.607693	0.669324	0.704931	0.570627	0.602091	0.810427	0.579196	0.647105	0.569689	0.583799	0.617355	0.561339	0.768774	0.699708	0.704502	0.426291	0.562621	0.617218	0.569622	0.665237	0.453759	0.56877	0.706861	0.760118	0.611167	0.785598	0.641486	0.74074	0.557732	0.429576	0.620997	0.683587	0.372735
	15.9184	0.659052	0.666808	0.744259	0.710588	0.807582	0.642779	0.63498	0.560005	0.614943	0.576446	0.817818	0.659476	0.591189	0.773808	0.540593	0.606081	0.660268	0.705632	0.56495	0.59547	0.807684	0.582558	0.643017	0.559713	0.575844	0.613414	0.553295	0.762447	0.694471	0.696112	0.433539	0.558465	0.61067	0.568858	0.664249	0.450382	0.564518	0.703074	0.757373	0.606951	0.781397	0.636086	0.736672	0.549533	0.423756	0.613249	0.678545	0.357072
	16.3265	0.657185	0.663454	0.738657	0.7081	0.805722	0.637309	0.627859	0.556411	0.607031	0.573345	0.816476	0.657388	0.585485	0.770778	0.541289	0.604628	0.651131	0.70617	0.560196	0.588678	0.805096	0.584952	0.639108	0.550309	0.567905	0.609604	0.545655	0.756017	0.689177	0.68777	0.441672	0.555041	0.604389	0.568785	0.663506	0.44781	0.56132	0.699663	0.754762	0.603336	0.777223	0.631198	0.732649	0.542101	0.419301	0.605919	0.673726	0.342583
	16.7347	0.65526	0.660402	0.733116	0.705509	0.803714	0.631854	0.620764	0.552737	0.599379	0.570679	0.814929	0.655208	0.580594	0.767893	0.541397	0.603218	0.641878	0.706441	0.556333	0.581683	0.802638	0.586213	0.635322	0.541463	0.559943	0.605814	0.538346	0.74945	0.683796	0.679448	0.450395	0.552265	0.598302	0.569303	0.662941	0.445906	0.559155	0.69662	0.752249	0.60027	0.773055	0.626786	0.728632	0.535423	0.416162	0.598984	0.66908	0.329387
	17.1429	0.653175	0.657589	0.727604	0.702748	0.801512	0.62635	0.613634	0.548878	0.591965	0.568373	0.81312	0.652871	0.576491	0.765116	0.540734	0.60174	0.632479	0.706349	0.553314	0.574465	0.800279	0.586213	0.631604	0.533153	0.551887	0.601938	0.531295	0.74272	0.678314	0.671133	0.459457	0.550056	0.592337	0.57029	0.662494	0.444517	0.55798	0.693895	0.749762	0.597705	0.768859	0.6228	0.724591	0.529478	0.41427	0.592421	0.664562	0.317594
	17.551	0.650881	0.655005	0.722131	0.699837	0.799095	0.620754	0.606464	0.544778	0.584816	0.566361	0.811032	0.650368	0.573159	0.762427	0.539192	0.600126	0.622941	0.705853	0.551099	0.567047	0.798008	0.584885	0.627936	0.525417	0.543768	0.597896	0.52445	0.735823	0.672765	0.662833	0.468659	0.548353	0.586454	0.571687	0.662126	0.443544	0.557771	0.691527	0.747321	0.59561	0.764658	0.619246	0.720519	0.524251	0.413563	0.586209	0.660141	0.30733
	17.9592	0.648303	0.652545	0.716641	0.696666	0.79641	0.615024	0.599228	0.54033	0.577887	0.564589	0.808619	0.647623	0.570562	0.759797	0.536643	0.598313	0.613265	0.704862	0.549624	0.559422	0.7958	0.582151	0.624276	0.518188	0.535538	0.593607	0.517755	0.72875	0.667119	0.654516	0.477776	0.547056	0.580594	0.573362	0.661788	0.442824	0.558461	0.689439	0.744831	0.593946	0.760412	0.616044	0.716414	0.519703	0.413953	0.580318	0.655783	0.298692
	18.3673	0.645437	0.650237	0.711162	0.693313	0.793461	0.609145	0.591971	0.535554	0.571235	0.563017	0.805886	0.644676	0.568677	0.757221	0.533037	0.596276	0.60349	0.703377	0.548844	0.551653	0.793654	0.578018	0.620633	0.511516	0.527253	0.589031	0.511192	0.721522	0.661447	0.646211	0.486691	0.546121	0.574751	0.575272	0.661462	0.442283	0.560012	0.687673	0.742321	0.592701	0.756163	0.613211	0.7123	0.515808	0.415368	0.574727	0.651475	0.291781
	18.7755	0.642255	0.647987	0.705649	0.689694	0.790207	0.603101	0.584715	0.530389	0.56483	0.56162	0.802816	0.641481	0.567465	0.754684	0.528316	0.593993	0.593649	0.701341	0.548691	0.543767	0.791559	0.572472	0.616993	0.505338	0.518914	0.584128	0.504729	0.71415	0.655733	0.637888	0.495236	0.545457	0.568899	0.57732	0.66112	0.441789	0.562351	0.68618	0.739731	0.591854	0.751895	0.610679	0.708199	0.512523	0.417719	0.569407	0.647198	0.286656
	19.1837	0.638762	0.645805	0.700116	0.685861	0.786656	0.596889	0.577511	0.524879	0.558715	0.56038	0.799415	0.63808	0.566887	0.752184	0.522457	0.591452	0.583785	0.698764	0.549107	0.535837	0.789513	0.565559	0.61337	0.499668	0.51055	0.578881	0.49836	0.706659	0.650046	0.629573	0.503334	0.545018	0.563042	0.579451	0.660756	0.441266	0.56542	0.684959	0.737054	0.591395	0.747631	0.608442	0.704144	0.50981	0.420929	0.564335	0.642946	0.283352
	19.5918	0.634966	0.643651	0.694554	0.68181	0.782799	0.590509	0.570406	0.519026	0.552901	0.559286	0.795696	0.634485	0.566902	0.749715	0.515466	0.588645	0.573942	0.695651	0.550027	0.527935	0.787517	0.557331	0.609776	0.494478	0.502206	0.573281	0.492073	0.699071	0.644415	0.621263	0.510891	0.544738	0.557182	0.58162	0.660362	0.440638	0.569153	0.684012	0.734288	0.59131	0.743393	0.60647	0.700165	0.507624	0.424921	0.559485	0.638709	0.281867
	20	0.630854	0.641481	0.688943	0.677517	0.778632	0.583957	0.563418	0.512848	0.547389	0.558324	0.791656	0.63071	0.567456	0.747268	0.507332	0.585545	0.564146	0.692002	0.551379	0.520128	0.78556	0.547846	0.606217	0.489722	0.493863	0.567314	0.485847	0.6914	0.638873	0.612959	0.517834	0.544551	0.551307	0.583756	0.659935	0.439819	0.573469	0.683293	0.731383	0.591573	0.739171	0.604718	0.696281	0.505915	0.429617	0.55483	0.634476	0.28215
	20.4082	0.626446	0.639309	0.683311	0.673045	0.774181	0.577233	0.556581	0.506396	0.542226	0.557476	0.787327	0.626822	0.568498	0.744838	0.498096	0.582134	0.554433	0.687875	0.553101	0.512522	0.783647	0.537211	0.602718	0.485407	0.485579	0.560977	0.479665	0.683664	0.633494	0.604686	0.524136	0.544413	0.545424	0.585855	0.659484	0.43878	0.578312	0.682839	0.728379	0.592162	0.73501	0.60319	0.692514	0.504639	0.434955	0.550349	0.630236	0.284125
	20.8163	0.621713	0.637051	0.677619	0.668318	0.769435	0.570324	0.549867	0.499648	0.537377	0.556713	0.782705	0.622814	0.569962	0.742406	0.487769	0.578369	0.54481	0.683277	0.555111	0.505181	0.78176	0.5255	0.599275	0.481443	0.477321	0.554249	0.473482	0.675863	0.628284	0.596428	0.529722	0.544246	0.539497	0.58785	0.659004	0.437439	0.583589	0.682588	0.725216	0.593034	0.730884	0.601818	0.688861	0.503741	0.44086	0.546014	0.625971	0.287666
	21.2245	0.616666	0.634738	0.6719	0.663406	0.764436	0.563225	0.543278	0.492665	0.53289	0.555997	0.777819	0.618771	0.571788	0.739964	0.476407	0.574221	0.535301	0.678291	0.557347	0.498214	0.779896	0.51285	0.595916	0.47784	0.469126	0.547121	0.467263	0.668006	0.623328	0.58822	0.534598	0.544012	0.533518	0.589746	0.65851	0.435792	0.589242	0.682569	0.721933	0.594153	0.726828	0.600612	0.685329	0.503175	0.447281	0.541804	0.621666	0.292637
	21.6327	0.611289	0.632294	0.66613	0.658245	0.759185	0.555923	0.536771	0.485419	0.528728	0.555278	0.772683	0.614703	0.573907	0.73749	0.464064	0.569661	0.525914	0.672953	0.559732	0.491689	0.778042	0.499379	0.59264	0.474509	0.460994	0.539568	0.460953	0.660093	0.618629	0.580045	0.53871	0.543636	0.527444	0.591507	0.658	0.433786	0.595187	0.682747	0.718503	0.595468	0.722831	0.599514	0.681909	0.502888	0.454154	0.537694	0.617301	0.298869
	22.0408	0.605585	0.629722	0.660322	0.652859	0.75372	0.548412	0.530321	0.477949	0.524904	0.554502	0.767317	0.610677	0.576253	0.734974	0.450816	0.564667	0.516669	0.667342	0.562199	0.485691	0.776186	0.485243	0.589465	0.471429	0.452934	0.531581	0.454506	0.652131	0.614244	0.57193	0.54206	0.543079	0.52125	0.593122	0.657484	0.431414	0.601356	0.683109	0.71493	0.596937	0.718901	0.59851	0.678597	0.502833	0.461431	0.533661	0.612864	0.306197
	22.449	0.599581	0.626999	0.654486	0.647249	0.748068	0.540696	0.523912	0.470268	0.521406	0.553612	0.76176	0.606741	0.578765	0.732406	0.436777	0.559248	0.507601	0.661541	0.564689	0.480289	0.774324	0.47062	0.586409	0.468552	0.445002	0.523155	0.447883	0.644133	0.610195	0.563878	0.544636	0.542288	0.514912	0.5946	0.656967	0.428673	0.607681	0.68366	0.711242	0.598518	0.715057	0.59758	0.675395	0.502962	0.469064	0.529687	0.608346	0.314448
	22.8571	0.593291	0.624086	0.648611	0.641377	0.742251	0.532778	0.517521	0.462391	0.518206	0.552554	0.756028	0.602931	0.58138	0.729777	0.422057	0.553417	0.49874	0.655612	0.567139	0.475529	0.772445	0.455689	0.58348	0.465812	0.437201	0.514294	0.441047	0.636114	0.606491	0.555892	0.546426	0.541217	0.508405	0.595915	0.656451	0.425546	0.614086	0.684346	0.707409	0.600176	0.711282	0.596676	0.672305	0.503228	0.477003	0.525749	0.603742	0.323454
	23.2653	0.586783	0.621017	0.642735	0.635311	0.736321	0.524683	0.511178	0.454386	0.515319	0.551282	0.750178	0.599331	0.584051	0.727092	0.406827	0.54722	0.490147	0.649671	0.569507	0.471469	0.770554	0.440686	0.580713	0.463209	0.429617	0.505028	0.433995	0.628106	0.603171	0.547999	0.54746	0.539852	0.50174	0.597103	0.655947	0.422071	0.620521	0.685195	0.703491	0.601889	0.707615	0.595813	0.669343	0.503593	0.485213	0.521833	0.599057	0.333063
	23.6735	0.580102	0.617737	0.63684	0.628993	0.730292	0.516431	0.504886	0.446268	0.512694	0.549758	0.744236	0.595952	0.586725	0.724349	0.391253	0.540703	0.48187	0.643779	0.571742	0.468111	0.768644	0.42582	0.578114	0.460657	0.42227	0.49539	0.426717	0.620133	0.600202	0.540188	0.547721	0.538149	0.494912	0.598141	0.655451	0.418239	0.62691	0.686142	0.699459	0.603635	0.704037	0.594933	0.66652	0.504011	0.493646	0.517916	0.594298	0.343123
	24.0816	0.573331	0.614298	0.630969	0.622502	0.724221	0.508061	0.498697	0.438137	0.510353	0.547958	0.738255	0.59288	0.589366	0.721563	0.375543	0.533928	0.473975	0.638053	0.573815	0.465482	0.766727	0.411357	0.575715	0.458169	0.415228	0.48544	0.419239	0.612236	0.597614	0.532493	0.547257	0.536115	0.487956	0.599063	0.654972	0.4141	0.63321	0.687199	0.695363	0.605406	0.700581	0.594055	0.663857	0.504449	0.502268	0.513987	0.58948	0.353509
	24.4898	0.566541	0.61067	0.62512	0.615813	0.718129	0.499606	0.492645	0.430027	0.508248	0.545861	0.732277	0.590127	0.591932	0.718741	0.359923	0.526953	0.466519	0.632567	0.575692	0.463552	0.764803	0.397544	0.573525	0.455679	0.408534	0.475235	0.411578	0.604445	0.595362	0.524906	0.546069	0.533726	0.480896	0.599874	0.654502	0.409672	0.63936	0.688327	0.691209	0.60719	0.697244	0.593142	0.661364	0.504868	0.511038	0.510029	0.584614	0.364096
	24.898	0.559799	0.606878	0.619315	0.608958	0.712059	0.491101	0.486766	0.422023	0.506377	0.543455	0.726339	0.58774	0.59439	0.71589	0.344627	0.519824	0.45955	0.627408	0.577343	0.462297	0.762875	0.384641	0.571554	0.453177	0.402205	0.464845	0.403765	0.596789	0.593436	0.517447	0.544192	0.530991	0.473766	0.600581	0.654041	0.404994	0.64531	0.689492	0.687006	0.608974	0.694026	0.592188	0.659048	0.505235	0.519917	0.506029	0.579711	0.374775
	25.3061	0.553185	0.602936	0.61358	0.601968	0.706045	0.482577	0.481099	0.414183	0.504719	0.540729	0.720489	0.585746	0.596708	0.71302	0.329928	0.512584	0.453113	0.622666	0.578749	0.461669	0.760951	0.372911	0.569808	0.450638	0.396288	0.45434	0.395829	0.589295	0.591802	0.510124	0.541652	0.52791	0.466603	0.601216	0.65358	0.400115	0.651021	0.690694	0.6828	0.610745	0.690943	0.59119	0.656907	0.505521	0.528867	0.501975	0.574781	0.385448
	25.7143	0.546734	0.598825	0.60791	0.59481	0.700106	0.474056	0.47564	0.406538	0.50323	0.537664	0.714744	0.584134	0.598847	0.710126	0.316081	0.505253	0.447224	0.618389	0.579879	0.461591	0.759022	0.362575	0.568267	0.448012	0.390754	0.443777	0.387782	0.581972	0.590401	0.502933	0.538454	0.524476	0.45942	0.60176	0.653103	0.395054	0.656436	0.691863	0.678567	0.612474	0.687964	0.59011	0.65492	0.505692	0.537841	0.497854	0.569823	0.396017
	26.1225	0.540511	0.59459	0.602348	0.587548	0.694286	0.46556	0.470406	0.399149	0.501908	0.534239	0.709143	0.582935	0.600778	0.707213	0.303383	0.497853	0.441902	0.614664	0.580717	0.462002	0.757091	0.353868	0.566923	0.445308	0.385627	0.433219	0.379644	0.574833	0.58921	0.495893	0.534643	0.520707	0.452247	0.602252	0.652599	0.38988	0.661528	0.693011	0.674367	0.614134	0.685103	0.588966	0.653063	0.505724	0.546802	0.493656	0.564835	0.4064
	26.5306	0.534536	0.590187	0.596877	0.58012	0.688586	0.457093	0.465362	0.391998	0.500682	0.530423	0.703696	0.582099	0.602461	0.704266	0.292103	0.490392	0.43714	0.611508	0.581234	0.462791	0.755142	0.346944	0.565736	0.442457	0.380866	0.422709	0.371407	0.567872	0.58814	0.488985	0.530206	0.516587	0.445075	0.60267	0.652038	0.384608	0.666244	0.694069	0.670174	0.61568	0.682321	0.58771	0.651293	0.505585	0.555696	0.489369	0.559806	0.416508
	26.9388	0.528848	0.585658	0.591535	0.572576	0.683042	0.448664	0.460492	0.38512	0.499543	0.526178	0.69842	0.581635	0.603865	0.70128	0.282514	0.482882	0.43293	0.608975	0.581412	0.46388	0.753168	0.341942	0.564679	0.439473	0.37646	0.412297	0.363075	0.561088	0.587163	0.482225	0.525178	0.512136	0.437911	0.603032	0.651405	0.3793	0.670557	0.695027	0.666024	0.617076	0.679611	0.586351	0.64957	0.505255	0.564482	0.484986	0.554724	0.426272
	27.3469	0.523474	0.580974	0.586316	0.564884	0.677654	0.440278	0.455762	0.378479	0.498425	0.521462	0.693327	0.581488	0.604956	0.69824	0.274857	0.475345	0.429255	0.60707	0.58123	0.465156	0.751155	0.338919	0.563707	0.436304	0.37239	0.402019	0.35464	0.554475	0.58619	0.475592	0.519556	0.507347	0.430747	0.603331	0.650666	0.373988	0.674429	0.695847	0.661923	0.618275	0.676947	0.584858	0.647847	0.504707	0.573105	0.480496	0.549574	0.435615
	27.7551	0.518435	0.576146	0.581232	0.557043	0.672432	0.431938	0.451141	0.372068	0.497291	0.516234	0.688415	0.581624	0.605703	0.695135	0.269312	0.467804	0.426094	0.605794	0.580671	0.466523	0.749089	0.337875	0.562776	0.43294	0.368613	0.39192	0.346102	0.548026	0.58517	0.469087	0.513352	0.502232	0.423572	0.603553	0.649797	0.368712	0.677828	0.69648	0.657863	0.619238	0.674297	0.583212	0.646079	0.50392	0.581515	0.475894	0.544343	0.444477
	28.1633	0.513777	0.571186	0.576302	0.549084	0.667384	0.423654	0.446624	0.365872	0.496103	0.51046	0.683699	0.582007	0.606084	0.691959	0.266006	0.460302	0.423434	0.605146	0.579726	0.467887	0.746962	0.338751	0.561848	0.429372	0.36514	0.382048	0.337473	0.541744	0.584041	0.462702	0.506588	0.496808	0.416396	0.603712	0.648772	0.363527	0.680733	0.696923	0.653883	0.619935	0.671657	0.581415	0.644232	0.502877	0.589666	0.471175	0.539021	0.452801
	28.5714	0.509518	0.566073	0.571513	0.540968	0.662496	0.415437	0.442193	0.35985	0.4948	0.504113	0.679166	0.582564	0.606075	0.688701	0.264951	0.452878	0.421252	0.605077	0.578382	0.469144	0.74476	0.341406	0.560873	0.425564	0.36192	0.372448	0.328767	0.535623	0.582726	0.456418	0.499256	0.491083	0.409211	0.60377	0.647564	0.358451	0.68311	0.697106	0.649949	0.620337	0.668982	0.579425	0.64227	0.501557	0.597501	0.466335	0.533597	0.460536
	28.9796	0.505707	0.560852	0.5669	0.532767	0.657778	0.407307	0.437874	0.354017	0.493372	0.497183	0.674829	0.583272	0.605668	0.685363	0.266095	0.445585	0.419539	0.605571	0.576642	0.470224	0.74248	0.345684	0.559821	0.421544	0.358961	0.363183	0.320023	0.529673	0.581193	0.45024	0.491397	0.485099	0.402047	0.603742	0.646155	0.353549	0.684952	0.697033	0.646104	0.62043	0.666277	0.57726	0.640174	0.49995	0.604978	0.461375	0.528068	0.467645
	29.3878	0.502365	0.555495	0.562443	0.524447	0.653201	0.39928	0.433675	0.348324	0.491756	0.48967	0.670676	0.584045	0.604848	0.681938	0.26927	0.438468	0.418273	0.606552	0.574501	0.471035	0.740114	0.351355	0.558645	0.417272	0.356227	0.354307	0.311276	0.523895	0.579359	0.444138	0.483004	0.478868	0.394916	0.603596	0.644521	0.348835	0.686232	0.696646	0.642321	0.620201	0.663506	0.574882	0.637922	0.498039	0.612042	0.456293	0.522428	0.47409
	29.7959	0.499521	0.550047	0.558168	0.51607	0.648766	0.391382	0.429633	0.342793	0.489952	0.48159	0.666702	0.584852	0.603611	0.678429	0.274256	0.431562	0.417441	0.607973	0.571965	0.471528	0.737658	0.3582	0.557314	0.41278	0.353694	0.345881	0.30258	0.518294	0.577201	0.438121	0.474111	0.472441	0.387853	0.603324	0.642653	0.344358	0.686945	0.695929	0.638612	0.619642	0.660662	0.572299	0.635499	0.495815	0.61865	0.451095	0.516675	0.479846
	30.2041	0.497193	0.544499	0.554068	0.507645	0.644444	0.383631	0.425776	0.337392	0.487919	0.472963	0.6629	0.58562	0.601953	0.674833	0.280778	0.424896	0.417019	0.609753	0.569038	0.471639	0.735111	0.365969	0.555788	0.40805	0.351338	0.33796	0.293984	0.51287	0.574661	0.432165	0.464731	0.465845	0.380885	0.602911	0.640536	0.340142	0.68708	0.694862	0.63498	0.618745	0.657731	0.569498	0.632887	0.493267	0.624757	0.445786	0.5108	0.484887
	30.6122	0.49537	0.538864	0.550143	0.499186	0.640217	0.376044	0.422121	0.332116	0.485645	0.463818	0.659245	0.586288	0.599869	0.671143	0.288528	0.418475	0.416974	0.61181	0.565719	0.47133	0.732462	0.374419	0.554027	0.403091	0.349092	0.330586	0.285534	0.507615	0.571707	0.426265	0.454875	0.459119	0.374034	0.602325	0.638165	0.336205	0.686627	0.693397	0.631398	0.617498	0.654683	0.566463	0.630064	0.490386	0.630316	0.440372	0.504795	0.489191
	31.0204	0.494051	0.533166	0.546406	0.49075	0.636065	0.368636	0.418695	0.326953	0.483123	0.45418	0.655729	0.586811	0.597356	0.667356	0.297212	0.412302	0.417272	0.614071	0.562016	0.470579	0.72971	0.383325	0.551999	0.397919	0.346936	0.323797	0.277276	0.502523	0.568318	0.420412	0.444578	0.452306	0.367327	0.601564	0.635536	0.332577	0.685591	0.691545	0.627889	0.615889	0.651521	0.563204	0.627008	0.487168	0.635289	0.434864	0.498647	0.492743
	31.4286	0.493189	0.527378	0.542832	0.482307	0.631949	0.361412	0.415483	0.321856	0.480317	0.444071	0.652312	0.587103	0.594406	0.663456	0.30652	0.406357	0.41786	0.616428	0.557925	0.469357	0.726841	0.39245	0.549654	0.392509	0.344783	0.317605	0.269239	0.497571	0.564453	0.414585	0.433831	0.445427	0.360761	0.600582	0.632648	0.32925	0.68396	0.689253	0.624406	0.613892	0.648204	0.559687	0.623687	0.483602	0.639629	0.429272	0.492337	0.49552
	31.8367	0.492754	0.521538	0.539441	0.473928	0.627857	0.35438	0.41249	0.316821	0.477243	0.433509	0.648977	0.587134	0.591015	0.659433	0.316188	0.400624	0.418693	0.618814	0.55345	0.467678	0.72385	0.401606	0.546961	0.3869	0.342599	0.312017	0.261455	0.492744	0.560121	0.40879	0.422673	0.438528	0.354345	0.599376	0.629508	0.326249	0.681745	0.686535	0.620969	0.611489	0.644733	0.555929	0.620074	0.479687	0.643302	0.42361	0.485846	0.497513
	32.2449	0.492687	0.515611	0.536202	0.465582	0.623742	0.347539	0.409687	0.311778	0.473859	0.422508	0.645687	0.586821	0.587173	0.655269	0.325951	0.395082	0.419712	0.621118	0.548587	0.465533	0.720723	0.410589	0.543877	0.38106	0.340321	0.307016	0.253941	0.488017	0.555287	0.402996	0.411102	0.431625	0.348062	0.597907	0.626119	0.323552	0.678943	0.68336	0.617543	0.608653	0.641079	0.5519	0.616139	0.475417	0.646267	0.417891	0.479151	0.498705
	32.6531	0.492932	0.509619	0.533123	0.457315	0.619589	0.340893	0.407057	0.306709	0.470176	0.411079	0.642411	0.586131	0.582878	0.65095	0.335589	0.389711	0.420867	0.623267	0.543336	0.462958	0.717448	0.419243	0.540372	0.375017	0.337898	0.302579	0.246718	0.48337	0.549971	0.39721	0.399147	0.424756	0.341902	0.596154	0.6225	0.321164	0.675562	0.679722	0.614116	0.605364	0.637231	0.547602	0.61186	0.47079	0.648492	0.412133	0.472235	0.499091
	33.0612	0.493442	0.503551	0.530186	0.449139	0.615361	0.334447	0.404582	0.301561	0.466174	0.399236	0.639124	0.585013	0.578127	0.646466	0.344903	0.384507	0.422112	0.625174	0.537702	0.459978	0.71402	0.427418	0.53642	0.368766	0.335311	0.298671	0.23981	0.478786	0.544165	0.39141	0.386833	0.417941	0.335854	0.594104	0.618663	0.319069	0.671613	0.675628	0.610687	0.601607	0.633185	0.543028	0.607222	0.465806	0.649947	0.406355	0.46508	0.498667
	33.4694	0.494154	0.497399	0.527377	0.441057	0.61103	0.328211	0.402242	0.296299	0.461844	0.387	0.635789	0.583422	0.572921	0.641805	0.353721	0.37946	0.423404	0.626756	0.531684	0.456636	0.710429	0.434984	0.531999	0.362307	0.33251	0.295248	0.233238	0.474251	0.537882	0.385593	0.374175	0.411207	0.3299	0.59172	0.614632	0.317243	0.667101	0.67105	0.607215	0.597375	0.628919	0.53816	0.602221	0.460464	0.650601	0.400575	0.457674	0.497436
	33.8775	0.495037	0.491189	0.5247	0.43313	0.606579	0.322202	0.400048	0.290917	0.457198	0.374401	0.632395	0.581346	0.567268	0.636967	0.361913	0.374578	0.424723	0.627956	0.525295	0.452995	0.706678	0.441847	0.527106	0.355671	0.329505	0.29227	0.227044	0.469763	0.531153	0.379757	0.36123	0.404591	0.324048	0.589008	0.610436	0.315681	0.66205	0.666023	0.60372	0.592672	0.624453	0.533017	0.596868	0.454772	0.650439	0.394817	0.450016	0.49541
	34.2857	0.496038	0.484894	0.522123	0.425339	0.601973	0.316441	0.397994	0.28538	0.452216	0.36148	0.628912	0.578737	0.561178	0.631947	0.369357	0.369862	0.426044	0.62869	0.51854	0.449105	0.702765	0.447905	0.52173	0.34884	0.326267	0.289687	0.221261	0.465317	0.523979	0.373886	0.348016	0.398109	0.318292	0.585932	0.606103	0.314341	0.656469	0.660521	0.600156	0.587508	0.619771	0.527573	0.591177	0.44873	0.649437	0.389104	0.442101	0.4926
	34.6939	0.497132	0.478558	0.519659	0.417762	0.597206	0.310957	0.39611	0.27972	0.446934	0.348291	0.62533	0.575607	0.554667	0.626755	0.375982	0.365313	0.427364	0.628925	0.511434	0.445055	0.6987	0.453104	0.515886	0.341861	0.322801	0.287461	0.215941	0.460922	0.516418	0.367995	0.334606	0.391806	0.312655	0.582501	0.601676	0.313219	0.650385	0.654575	0.596538	0.581904	0.614897	0.521852	0.585177	0.442348	0.647587	0.383462	0.433938	0.489032
	35.102	0.498281	0.47216	0.517279	0.410394	0.592251	0.305779	0.394411	0.273927	0.441341	0.334894	0.621635	0.571925	0.547755	0.621394	0.381721	0.360928	0.428677	0.628596	0.503991	0.440911	0.694489	0.457376	0.509578	0.334723	0.319103	0.285547	0.211127	0.45658	0.508479	0.362068	0.321042	0.385696	0.307151	0.578703	0.597187	0.312271	0.643818	0.648189	0.592842	0.575881	0.609836	0.515844	0.578897	0.435632	0.644878	0.377915	0.425534	0.484726
	35.5102	0.499448	0.46573	0.514986	0.403281	0.587104	0.30094	0.392924	0.268041	0.435472	0.321355	0.617813	0.567699	0.540458	0.615873	0.386542	0.356689	0.429986	0.627674	0.496221	0.436764	0.690144	0.46068	0.502821	0.327458	0.315154	0.283905	0.206867	0.452299	0.50022	0.356123	0.307393	0.379814	0.3018	0.574533	0.592683	0.31148	0.636793	0.641373	0.589057	0.569464	0.604599	0.509559	0.572369	0.428592	0.641307	0.37249	0.4169	0.479711
	35.9184	0.500601	0.459276	0.512769	0.396453	0.581753	0.296472	0.39167	0.26208	0.429344	0.307736	0.613864	0.562932	0.532802	0.610201	0.390428	0.352577	0.43129	0.62613	0.48814	0.4327	0.68568	0.46298	0.495634	0.320079	0.310964	0.282492	0.203201	0.448085	0.491675	0.350156	0.293737	0.37418	0.296623	0.570006	0.588203	0.310817	0.629341	0.634165	0.58519	0.562677	0.599212	0.503011	0.565625	0.42124	0.636874	0.367215	0.408045	0.474015
	36.3265	0.501684	0.452793	0.51061	0.389904	0.576192	0.292399	0.390648	0.256061	0.422971	0.294097	0.609768	0.557613	0.524801	0.604384	0.393367	0.348552	0.432582	0.623931	0.479755	0.428802	0.681104	0.464235	0.488029	0.312587	0.306499	0.281263	0.200154	0.443936	0.482885	0.344175	0.280138	0.368805	0.291624	0.56511	0.583789	0.310245	0.621483	0.62656	0.581207	0.555537	0.593673	0.496192	0.55869	0.413584	0.631581	0.362113	0.398979	0.467665
	36.7347	0.502662	0.446315	0.508515	0.383688	0.570427	0.288746	0.389867	0.250022	0.416394	0.280489	0.605529	0.551776	0.516481	0.598429	0.395379	0.344583	0.433862	0.621082	0.471079	0.425165	0.676435	0.464434	0.480031	0.305017	0.30177	0.280172	0.197748	0.439856	0.473911	0.338193	0.266705	0.363708	0.286817	0.559873	0.579481	0.309749	0.613256	0.618612	0.577133	0.548067	0.588015	0.489134	0.551592	0.405641	0.625439	0.357211	0.389712	0.460695
	37.1429	0.503474	0.439816	0.506453	0.377766	0.564449	0.285526	0.389296	0.243951	0.409609	0.266954	0.601132	0.545408	0.507857	0.592339	0.396474	0.34063	0.435115	0.617559	0.462116	0.421855	0.671678	0.463542	0.47165	0.297349	0.296758	0.279162	0.195976	0.435838	0.464777	0.332206	0.253516	0.358878	0.282186	0.554292	0.575312	0.309279	0.604684	0.610323	0.572935	0.540281	0.582236	0.48182	0.544353	0.397421	0.618454	0.352531	0.380253	0.453132
	37.551	0.504077	0.433331	0.504435	0.37218	0.558279	0.282751	0.388919	0.237883	0.402661	0.253528	0.596579	0.538551	0.498952	0.586121	0.396691	0.336658	0.436335	0.613381	0.452878	0.418961	0.666849	0.461558	0.462916	0.289619	0.29147	0.278181	0.194834	0.431882	0.455556	0.326238	0.2407	0.354327	0.277729	0.548394	0.571317	0.308828	0.595802	0.60174	0.568626	0.532201	0.576362	0.474278	0.537	0.388942	0.610644	0.348094	0.370616	0.445014
	37.9592	0.504426	0.426844	0.502433	0.366897	0.551913	0.280423	0.388695	0.231807	0.395547	0.240242	0.591867	0.531216	0.489788	0.579781	0.396072	0.332647	0.437511	0.60855	0.443372	0.416532	0.661959	0.458473	0.453851	0.281812	0.285926	0.277168	0.194292	0.427984	0.446273	0.320283	0.228374	0.350033	0.273429	0.542199	0.56752	0.308352	0.586641	0.592894	0.564202	0.523848	0.570408	0.46651	0.529561	0.380219	0.602028	0.343919	0.360817	0.436373
	38.3674	0.504483	0.42037	0.500447	0.361919	0.545375	0.278543	0.388587	0.225741	0.388296	0.227128	0.586995	0.52344	0.480392	0.573328	0.394674	0.328578	0.438641	0.603089	0.433608	0.414628	0.657022	0.454294	0.444485	0.273945	0.280135	0.276069	0.194319	0.424148	0.436985	0.31436	0.21668	0.345991	0.269272	0.535723	0.563945	0.307835	0.57723	0.583806	0.559653	0.515253	0.564385	0.458525	0.52207	0.37127	0.592626	0.340022	0.350877	0.427251
	38.7755	0.504233	0.413924	0.498468	0.35725	0.538679	0.277105	0.388569	0.219703	0.380923	0.214219	0.581977	0.51527	0.470795	0.566776	0.392579	0.32445	0.439729	0.597033	0.423602	0.413284	0.652058	0.449044	0.43486	0.26603	0.274153	0.274835	0.194876	0.42038	0.427736	0.308475	0.205787	0.342186	0.265257	0.529014	0.560606	0.307256	0.567612	0.574535	0.555004	0.506455	0.558328	0.450351	0.51457	0.362118	0.582472	0.336418	0.340827	0.417694
	39.1837	0.503653	0.4075	0.49648	0.352849	0.531843	0.276102	0.388603	0.213705	0.373435	0.201555	0.576816	0.506736	0.461031	0.560139	0.389871	0.320263	0.440782	0.590405	0.413367	0.412519	0.647082	0.44274	0.425008	0.258058	0.268002	0.27342	0.195917	0.416688	0.418557	0.302636	0.195852	0.338595	0.261374	0.522085	0.557515	0.30659	0.557812	0.565092	0.550233	0.4975	0.552241	0.441983	0.507104	0.352784	0.571593	0.333114	0.330701	0.407747
	39.5918	0.502754	0.401141	0.494493	0.34875	0.524899	0.275525	0.388684	0.207801	0.365869	0.189183	0.571535	0.497912	0.451142	0.553441	0.386672	0.316024	0.441822	0.58327	0.402926	0.412349	0.64212	0.435432	0.414984	0.250065	0.26175	0.271795	0.197408	0.413091	0.409504	0.296863	0.187076	0.335213	0.257642	0.514994	0.554678	0.305839	0.547875	0.555541	0.545377	0.488444	0.546168	0.433464	0.499728	0.343294	0.560033	0.33012	0.320542	0.397466
	40	0.501533	0.394834	0.492483	0.344898	0.517864	0.275359	0.388789	0.202009	0.358224	0.177153	0.566149	0.488835	0.441172	0.546701	0.383101	0.311738	0.442867	0.575663	0.392297	0.412751	0.637195	0.427154	0.404828	0.242034	0.25544	0.269935	0.199301	0.409602	0.400589	0.291157	0.179618	0.332012	0.254069	0.507772	0.552091	0.304976	0.537831	0.545903	0.540423	0.479345	0.54012	0.424796	0.49249	0.333674	0.547831	0.327437	0.310396	0.386898
	40.4082	0.500006	0.388627	0.490464	0.341318	0.510779	0.275589	0.388924	0.196394	0.350543	0.165516	0.560679	0.479583	0.431169	0.539947	0.379308	0.307405	0.443944	0.567658	0.381502	0.413712	0.632334	0.417964	0.394595	0.234	0.249122	0.267831	0.201566	0.40624	0.391866	0.285544	0.173659	0.328985	0.250677	0.50047	0.54975	0.304015	0.527722	0.536224	0.535394	0.470267	0.534129	0.416015	0.485443	0.323954	0.535034	0.325067	0.300316	0.376101
	40.8163	0.498187	0.382523	0.488422	0.337976	0.503666	0.276194	0.389083	0.190991	0.342834	0.154321	0.555152	0.470214	0.421184	0.533202	0.375446	0.30302	0.445074	0.559315	0.370565	0.415183	0.627563	0.407919	0.38433	0.225956	0.242858	0.265478	0.204163	0.40302	0.383344	0.280025	0.16932	0.326109	0.247488	0.493139	0.547639	0.302943	0.517585	0.52655	0.530305	0.461273	0.528218	0.407145	0.478632	0.314166	0.521694	0.323005	0.290355	0.365128
	41.2245	0.496081	0.376545	0.486358	0.334858	0.496564	0.277146	0.389259	0.185843	0.335126	0.143609	0.549584	0.460791	0.411266	0.526485	0.371673	0.298567	0.446272	0.550705	0.359503	0.417115	0.622905	0.397075	0.374074	0.217916	0.236677	0.262875	0.207059	0.399952	0.37505	0.274623	0.166684	0.323366	0.24451	0.485818	0.545739	0.301771	0.507454	0.516902	0.525154	0.452422	0.5224	0.398202	0.472091	0.304341	0.507862	0.321243	0.280567	0.354031
	41.6327	0.493705	0.370723	0.484275	0.33196	0.489506	0.278413	0.389448	0.180995	0.327445	0.133412	0.544004	0.451396	0.401469	0.519821	0.368162	0.294032	0.447554	0.541917	0.348343	0.419444	0.618387	0.385511	0.363877	0.209894	0.230646	0.260027	0.210218	0.397044	0.367005	0.269348	0.165773	0.320739	0.241762	0.478575	0.544026	0.300509	0.497372	0.507345	0.519979	0.443775	0.516707	0.389232	0.465853	0.294519	0.4936	0.31977	0.271008	0.342863
	42.0408	0.491056	0.365051	0.482158	0.329225	0.482521	0.279952	0.389621	0.176453	0.319796	0.123749	0.538424	0.442077	0.391842	0.51322	0.365065	0.289393	0.448916	0.533015	0.337099	0.422088	0.614024	0.373291	0.353766	0.201874	0.224792	0.256931	0.213595	0.394294	0.359206	0.264207	0.166517	0.318197	0.239233	0.471442	0.542465	0.299158	0.487365	0.497888	0.514765	0.435381	0.511135	0.38024	0.459933	0.284734	0.478965	0.318571	0.261732	0.331672
	42.449	0.488147	0.359572	0.480023	0.326667	0.475651	0.281718	0.389761	0.172257	0.312217	0.11463	0.532869	0.43293	0.382441	0.506701	0.36255	0.284636	0.45036	0.524102	0.325795	0.424978	0.609836	0.360513	0.343786	0.193883	0.219176	0.253592	0.21715	0.391702	0.351678	0.259221	0.168814	0.315725	0.236924	0.464484	0.541025	0.297749	0.477477	0.48859	0.509552	0.427295	0.505711	0.371275	0.454347	0.275033	0.464024	0.31763	0.252795	0.320512
	42.8571	0.484982	0.354269	0.477849	0.324215	0.468916	0.283653	0.389821	0.168396	0.304696	0.106054	0.527355	0.424004	0.373317	0.50027	0.360751	0.279751	0.451871	0.515249	0.314451	0.428015	0.605834	0.347266	0.333962	0.185897	0.213845	0.25	0.220824	0.389259	0.344399	0.254387	0.17247	0.313284	0.234818	0.457739	0.53966	0.296281	0.467735	0.479472	0.504335	0.419565	0.50043	0.362351	0.449098	0.265459	0.448846	0.316924	0.244252	0.309431
	43.2653	0.481575	0.349176	0.475646	0.321868	0.462359	0.285703	0.38977	0.164889	0.297263	0.0980205	0.521896	0.415385	0.364525	0.493939	0.359803	0.274737	0.453439	0.506554	0.303091	0.431121	0.602032	0.333667	0.324328	0.177936	0.208845	0.246156	0.224568	0.386958	0.337384	0.249725	0.177295	0.310858	0.232899	0.451254	0.538334	0.294791	0.458173	0.470567	0.499136	0.412239	0.495302	0.353503	0.444188	0.256063	0.433503	0.316433	0.236161	0.298482
	43.6735	0.477952	0.344293	0.473405	0.319586	0.455998	0.287806	0.389567	0.16174	0.289914	0.0905248	0.516517	0.407143	0.356123	0.487716	0.359812	0.269605	0.45505	0.4981	0.291743	0.4342	0.598437	0.319849	0.314917	0.16999	0.204243	0.242057	0.228321	0.384792	0.330615	0.245233	0.183056	0.308415	0.23116	0.445079	0.536997	0.293295	0.448826	0.461915	0.493974	0.405367	0.490337	0.344767	0.439619	0.246901	0.418077	0.316131	0.22858	0.287717
	44.0816	0.474134	0.339628	0.471124	0.317336	0.449863	0.289904	0.389177	0.158953	0.282656	0.0835667	0.511226	0.399342	0.348166	0.481609	0.360858	0.264369	0.456693	0.48997	0.280434	0.437168	0.595056	0.305949	0.305752	0.162057	0.200069	0.237705	0.232031	0.382751	0.324084	0.240921	0.189535	0.305934	0.229586	0.439241	0.535608	0.291824	0.439718	0.453523	0.488846	0.398997	0.485525	0.336162	0.435388	0.238029	0.402647	0.315994	0.221565	0.27719
	44.4898	0.47017	0.335207	0.468809	0.315121	0.443978	0.291943	0.388585	0.156556	0.275505	0.0771509	0.506051	0.392064	0.340716	0.47563	0.363003	0.259052	0.458362	0.482256	0.269203	0.439944	0.5919	0.292147	0.296871	0.154155	0.19639	0.233114	0.235652	0.380836	0.317785	0.236797	0.196529	0.303399	0.228185	0.433792	0.534123	0.290416	0.430886	0.445441	0.483793	0.393179	0.480888	0.327745	0.431495	0.229515	0.387308	0.315996	0.215175	0.266958
	44.898	0.466094	0.33102	0.466444	0.31289	0.438356	0.29387	0.387771	0.154549	0.26845	0.0712847	0.501002	0.385354	0.333829	0.469784	0.366262	0.253675	0.460047	0.475021	0.258086	0.442443	0.58897	0.278613	0.288293	0.146266	0.193223	0.228302	0.239139	0.379038	0.31169	0.23286	0.203839	0.300788	0.226955	0.428746	0.532501	0.289094	0.422352	0.437663	0.478801	0.387958	0.476411	0.31953	0.427936	0.221425	0.372151	0.31611	0.20946	0.257072
	45.3061	0.461962	0.327104	0.464049	0.31067	0.433022	0.295643	0.386748	0.152974	0.261522	0.0659785	0.496105	0.379289	0.327566	0.464085	0.370638	0.248255	0.461749	0.468351	0.247126	0.444602	0.586276	0.265558	0.280048	0.13842	0.190602	0.223304	0.242469	0.37736	0.305804	0.229126	0.211314	0.298101	0.225913	0.424141	0.530709	0.287915	0.414149	0.430229	0.473907	0.383377	0.47211	0.311576	0.424707	0.213834	0.357279	0.316314	0.204464	0.247591
	45.7143	0.457818	0.323446	0.461607	0.308422	0.427976	0.297223	0.385517	0.151834	0.254711	0.0612413	0.491373	0.373899	0.321977	0.458536	0.376089	0.242808	0.463462	0.462293	0.236369	0.446346	0.583818	0.253194	0.272153	0.130602	0.188531	0.218156	0.245616	0.375797	0.300095	0.225587	0.218792	0.295322	0.225071	0.419988	0.528708	0.286901	0.4063	0.423142	0.46911	0.379468	0.467979	0.303912	0.421797	0.206817	0.342797	0.316581	0.200221	0.238562
	46.1225	0.453704	0.320072	0.459132	0.306159	0.423236	0.298577	0.384102	0.151153	0.248045	0.0570793	0.486819	0.369229	0.317111	0.453144	0.382552	0.237334	0.465179	0.456904	0.22586	0.447626	0.581598	0.241747	0.264624	0.12283	0.186994	0.212906	0.248569	0.374344	0.294565	0.222262	0.226167	0.292454	0.224437	0.4163	0.526476	0.286108	0.398828	0.41641	0.464423	0.376259	0.464016	0.29658	0.419191	0.200449	0.328815	0.31689	0.196751	0.230037
	46.5306	0.449664	0.316981	0.456619	0.303877	0.418797	0.299678	0.382522	0.150941	0.24153	0.0534943	0.482461	0.365302	0.313008	0.447911	0.389938	0.231838	0.46689	0.452223	0.215654	0.448387	0.579617	0.23146	0.257471	0.115109	0.185978	0.207605	0.251316	0.372996	0.289194	0.219147	0.233324	0.289489	0.224025	0.413088	0.523983	0.285569	0.391761	0.410056	0.459865	0.37376	0.460227	0.289628	0.416868	0.194809	0.31545	0.317217	0.194058	0.222059
	46.9388	0.44572	0.314169	0.454067	0.301553	0.414659	0.300497	0.380789	0.151184	0.235178	0.0504835	0.478299	0.362119	0.309695	0.442831	0.39813	0.22631	0.468575	0.448262	0.205801	0.448589	0.577867	0.222551	0.250693	0.107431	0.185422	0.202305	0.253847	0.371737	0.283973	0.216248	0.240178	0.286423	0.223825	0.410334	0.521213	0.285324	0.385109	0.40406	0.455426	0.37197	0.456591	0.283081	0.414798	0.189966	0.302814	0.317542	0.192129	0.214668
	47.3469	0.441905	0.311648	0.451487	0.299213	0.410818	0.301011	0.378924	0.151887	0.229013	0.0480429	0.474346	0.359693	0.307192	0.437901	0.407008	0.22075	0.470213	0.445044	0.196361	0.448202	0.576342	0.215242	0.244293	0.0998193	0.185293	0.197062	0.25615	0.370556	0.278906	0.213573	0.246657	0.283258	0.223837	0.408044	0.51815	0.285414	0.378899	0.398451	0.451135	0.370877	0.453117	0.276995	0.412948	0.185987	0.291031	0.317846	0.190935	0.2079
	47.7551	0.438227	0.309389	0.448864	0.296813	0.407255	0.301193	0.376924	0.153008	0.223031	0.0461686	0.470595	0.357984	0.305502	0.433107	0.416417	0.215156	0.471772	0.442543	0.187392	0.447194	0.575025	0.209694	0.238259	0.0922513	0.18551	0.191925	0.258201	0.369431	0.273971	0.211115	0.252686	0.279978	0.224042	0.406184	0.51478	0.285858	0.373136	0.393201	0.446973	0.370453	0.44978	0.271384	0.411278	0.182922	0.280214	0.318111	0.190429	0.20178
	48.1633	0.434705	0.307404	0.446213	0.294382	0.403965	0.301018	0.374799	0.154534	0.217264	0.0448605	0.467046	0.356984	0.304619	0.428438	0.426216	0.209531	0.473223	0.440751	0.178961	0.445556	0.573905	0.206027	0.232587	0.0847516	0.186018	0.186952	0.259982	0.368346	0.269189	0.208885	0.258223	0.276589	0.224425	0.404741	0.511102	0.286698	0.367836	0.388323	0.442962	0.370662	0.446579	0.266296	0.409752	0.180812	0.270475	0.318321	0.190553	0.196335
	48.5714	0.431349	0.305657	0.44352	0.291889	0.400915	0.300462	0.372543	0.156422	0.211702	0.0441222	0.463695	0.356637	0.304524	0.423878	0.436241	0.203891	0.474532	0.439619	0.171134	0.443271	0.572959	0.204272	0.227262	0.0773049	0.186746	0.182193	0.26146	0.367279	0.264544	0.206872	0.263205	0.273078	0.22497	0.403679	0.507109	0.287938	0.363005	0.383802	0.439093	0.371459	0.443499	0.26175	0.408331	0.179676	0.261917	0.318461	0.191236	0.191578
	48.9796	0.428167	0.304145	0.440794	0.289341	0.398095	0.299506	0.37016	0.158639	0.20637	0.0439608	0.460531	0.356903	0.305188	0.419413	0.44634	0.19825	0.47567	0.439101	0.163983	0.440343	0.57217	0.20438	0.222274	0.0699231	0.187624	0.177707	0.262609	0.366214	0.260056	0.205083	0.267603	0.269444	0.225656	0.402963	0.502807	0.289602	0.358647	0.379624	0.435366	0.372793	0.440528	0.257767	0.406984	0.179515	0.254624	0.318517	0.192403	0.187517
	49.3878	0.425177	0.302848	0.438031	0.286749	0.395471	0.298132	0.367658	0.161162	0.201272	0.0443843	0.457552	0.357725	0.306573	0.415028	0.456365	0.192637	0.476615	0.439138	0.157582	0.436779	0.571518	0.206224	0.217615	0.0626138	0.188606	0.173555	0.263404	0.365139	0.255732	0.203511	0.27138	0.26569	0.226482	0.402564	0.498201	0.291689	0.354768	0.375792	0.431795	0.374613	0.437668	0.254376	0.405685	0.180308	0.248666	0.31848	0.193976	0.184155
	49.7959	0.422384	0.301739	0.435228	0.284094	0.393019	0.296332	0.365046	0.163946	0.196415	0.0453979	0.454742	0.359035	0.308631	0.410711	0.466166	0.187074	0.477346	0.43965	0.151997	0.432588	0.570979	0.209594	0.213273	0.0553723	0.189621	0.169799	0.263825	0.364044	0.251581	0.202154	0.274506	0.261811	0.227436	0.402429	0.493305	0.294199	0.35136	0.37227	0.428358	0.376862	0.434898	0.251573	0.404413	0.182016	0.244077	0.318338	0.195876	0.181483
	50.2041	0.419807	0.300818	0.432397	0.28142	0.390713	0.294107	0.362357	0.166987	0.191825	0.047003	0.452101	0.360785	0.311313	0.406453	0.47562	0.181585	0.477856	0.440574	0.147292	0.427803	0.570541	0.214254	0.209247	0.0482277	0.190638	0.166509	0.263864	0.362926	0.247633	0.201015	0.276975	0.257822	0.228526	0.402536	0.488138	0.297128	0.348429	0.369066	0.425078	0.37949	0.432228	0.249384	0.403157	0.184585	0.24087	0.318086	0.198031	0.179488
	50.6123	0.417446	0.300044	0.429526	0.278705	0.388516	0.291462	0.359613	0.170241	0.187497	0.0491948	0.449612	0.362889	0.314563	0.402244	0.484598	0.176189	0.478136	0.441812	0.143515	0.422443	0.570181	0.219921	0.205526	0.0411698	0.191602	0.16375	0.263518	0.361782	0.243893	0.200081	0.27876	0.253722	0.229754	0.40283	0.482718	0.30045	0.34596	0.366145	0.421934	0.382443	0.429645	0.24779	0.401906	0.187943	0.239019	0.317715	0.200369	0.178144
	51.0204	0.41531	0.299423	0.426631	0.275994	0.386411	0.288415	0.356864	0.1737	0.183467	0.0519634	0.447271	0.365301	0.318324	0.398079	0.493	0.170896	0.478186	0.443295	0.140699	0.416556	0.569886	0.226327	0.202112	0.0342318	0.192481	0.161589	0.262801	0.360616	0.2404	0.199362	0.279874	0.24953	0.231126	0.403285	0.477075	0.304156	0.34395	0.3635	0.418937	0.385671	0.427153	0.2468	0.400657	0.192015	0.23847	0.317224	0.202828	0.177425
	51.4286	0.413394	0.298918	0.423705	0.273286	0.384358	0.284985	0.354145	0.177332	0.179734	0.0552932	0.445066	0.367941	0.322536	0.393949	0.500727	0.165715	0.478005	0.444929	0.138855	0.41018	0.569639	0.233198	0.198999	0.0274172	0.193241	0.160082	0.261721	0.359428	0.237164	0.198844	0.280307	0.24525	0.232649	0.403862	0.471233	0.308205	0.342386	0.361113	0.416081	0.389122	0.42475	0.246392	0.399406	0.196715	0.239136	0.316608	0.20535	0.17729
	51.8367	0.411681	0.298518	0.420757	0.270596	0.382339	0.281199	0.3515	0.181102	0.176326	0.0591638	0.442979	0.370752	0.327138	0.389847	0.507694	0.160644	0.47759	0.446634	0.137966	0.403369	0.569426	0.240289	0.196185	0.0207522	0.19384	0.159274	0.260297	0.358219	0.234219	0.198529	0.280068	0.240893	0.234314	0.404521	0.465228	0.312572	0.341251	0.358956	0.413355	0.392744	0.422429	0.246546	0.398146	0.201961	0.24091	0.315865	0.207883	0.177699
	52.2449	0.410156	0.298204	0.417792	0.267952	0.380323	0.277087	0.348966	0.184984	0.173256	0.0635501	0.441003	0.373674	0.332072	0.385769	0.513829	0.155685	0.476941	0.448333	0.137996	0.396182	0.569231	0.247379	0.19367	0.0142883	0.194264	0.159195	0.258544	0.356992	0.231587	0.198411	0.27917	0.23647	0.236121	0.405245	0.45909	0.317213	0.340535	0.357027	0.410774	0.396488	0.420199	0.247244	0.396874	0.207669	0.24367	0.314996	0.21038	0.178606
	52.6531	0.408783	0.297939	0.414805	0.265334	0.378285	0.272677	0.346564	0.18892	0.17053	0.0684224	0.439111	0.376638	0.337274	0.381702	0.519054	0.150835	0.476048	0.449942	0.138878	0.388674	0.569036	0.254261	0.191446	0.00816462	0.194469	0.159854	0.256471	0.35574	0.229284	0.198478	0.277614	0.231977	0.238049	0.405989	0.452851	0.322082	0.340209	0.355286	0.408308	0.400296	0.41804	0.248436	0.395581	0.213759	0.247277	0.313999	0.212796	0.17996
	53.0612	0.407533	0.297719	0.411811	0.262785	0.376207	0.268	0.34432	0.19288	0.168169	0.0737477	0.437292	0.379609	0.342688	0.377641	0.523317	0.146095	0.474908	0.451403	0.140536	0.380921	0.568827	0.260774	0.189516	0.00363452	0.194453	0.161243	0.254086	0.354463	0.227341	0.198732	0.275424	0.227428	0.240082	0.406744	0.446544	0.327137	0.340259	0.353737	0.405977	0.404117	0.415964	0.250104	0.394263	0.220155	0.251601	0.312875	0.215094	0.181713
	53.4694	0.406365	0.297495	0.408799	0.260279	0.37406	0.263083	0.342231	0.196799	0.166162	0.0794903	0.435518	0.382518	0.348252	0.373576	0.526553	0.141477	0.47351	0.452637	0.142873	0.372982	0.568583	0.266758	0.18787	0.00616096	0.194194	0.16333	0.251388	0.353156	0.225757	0.199151	0.272601	0.222816	0.242196	0.407475	0.440197	0.332315	0.340655	0.352341	0.403757	0.407894	0.413954	0.252189	0.392913	0.226787	0.256503	0.311625	0.217234	0.18381
	53.8775	0.405241	0.297262	0.405784	0.257843	0.371836	0.25796	0.340305	0.200642	0.164524	0.0856144	0.433769	0.385339	0.35391	0.369501	0.528718	0.136988	0.471853	0.453599	0.145789	0.364941	0.568289	0.2721	0.186511	0.0116294	0.193694	0.16607	0.248379	0.351816	0.224561	0.199735	0.269171	0.218149	0.244366	0.408172	0.433843	0.337576	0.341374	0.35109	0.401651	0.411579	0.412011	0.254657	0.391531	0.233593	0.261862	0.310249	0.219187	0.186204
	54.2857	0.404131	0.296982	0.40276	0.255477	0.369509	0.252663	0.338529	0.204366	0.163233	0.0920859	0.432026	0.388028	0.35961	0.365412	0.529774	0.132651	0.469936	0.45423	0.149183	0.356867	0.567926	0.276696	0.185435	0.0172885	0.192965	0.1694	0.245057	0.350442	0.223744	0.200466	0.265145	0.213429	0.246578	0.408819	0.427503	0.342853	0.342388	0.349967	0.399657	0.415123	0.410133	0.257457	0.390122	0.240511	0.267561	0.308749	0.220925	0.188847
	54.6939	0.402999	0.296636	0.399732	0.253179	0.367073	0.247229	0.336896	0.207929	0.162288	0.0988742	0.430261	0.390559	0.365299	0.361306	0.529687	0.128481	0.467766	0.454491	0.152954	0.348836	0.567479	0.280468	0.18464	0.022869	0.192016	0.17325	0.241429	0.349038	0.223313	0.201333	0.260547	0.208659	0.248808	0.409399	0.421205	0.348099	0.343667	0.348942	0.397758	0.418487	0.408309	0.260539	0.388692	0.247492	0.273495	0.307125	0.222427	0.191693
	55.102	0.40183	0.296213	0.396707	0.250984	0.364514	0.241701	0.335399	0.21132	0.161671	0.105954	0.428463	0.392915	0.370934	0.357188	0.528449	0.124501	0.465358	0.454354	0.15701	0.340931	0.566936	0.283366	0.184127	0.0282879	0.190887	0.177542	0.23751	0.347611	0.223264	0.202329	0.255407	0.203854	0.251055	0.409919	0.414969	0.353258	0.345185	0.348016	0.39597	0.421637	0.406552	0.263868	0.387261	0.254488	0.279576	0.305381	0.223679	0.194702
	55.5102	0.400599	0.29568	0.393679	0.248872	0.361824	0.236125	0.334025	0.214502	0.161356	0.113303	0.426606	0.39507	0.376473	0.353061	0.52605	0.120728	0.462729	0.453783	0.161265	0.333217	0.566285	0.285346	0.183891	0.0335357	0.189597	0.182199	0.233317	0.346168	0.223575	0.203434	0.249745	0.199016	0.253308	0.410359	0.408813	0.358274	0.346908	0.347149	0.394265	0.424546	0.404844	0.267382	0.385844	0.261456	0.285724	0.303516	0.224671	0.197832
	55.9184	0.399297	0.295045	0.390666	0.246889	0.359002	0.230557	0.332781	0.217479	0.161333	0.120904	0.424681	0.397031	0.381881	0.348936	0.522508	0.117173	0.459909	0.452778	0.165644	0.325778	0.565519	0.2864	0.183934	0.0385737	0.188194	0.187147	0.228886	0.344725	0.224243	0.204648	0.243608	0.194165	0.255568	0.410736	0.402753	0.363109	0.348812	0.346344	0.392663	0.427195	0.4032	0.271057	0.384464	0.268361	0.291876	0.301534	0.225402	0.201052
	56.3265	0.39791	0.294277	0.387656	0.245022	0.35604	0.22505	0.331656	0.220228	0.161562	0.128741	0.422668	0.398776	0.387126	0.344822	0.517843	0.113844	0.456921	0.451316	0.170079	0.318672	0.564632	0.286518	0.184246	0.0434013	0.186709	0.192313	0.22425	0.343292	0.225228	0.20595	0.237021	0.189307	0.257836	0.411042	0.3968	0.367702	0.350863	0.345569	0.391144	0.429568	0.40161	0.274837	0.383141	0.275169	0.297976	0.299435	0.225874	0.204325
	56.7347	0.396428	0.293383	0.384668	0.243293	0.352946	0.219666	0.330655	0.222744	0.162036	0.136798	0.420553	0.400317	0.392182	0.34073	0.512089	0.11074	0.453794	0.449413	0.174512	0.311968	0.563619	0.285719	0.18482	0.0480003	0.185177	0.197639	0.219452	0.34188	0.226518	0.207337	0.230031	0.184459	0.260106	0.411286	0.390964	0.372026	0.353035	0.344814	0.389709	0.431654	0.400074	0.278695	0.381892	0.281853	0.303981	0.297222	0.226093	0.207621
	57.1429	0.394842	0.292348	0.381698	0.241714	0.349717	0.21446	0.329774	0.225018	0.162714	0.145054	0.418327	0.40165	0.397025	0.336672	0.505293	0.107857	0.450555	0.447072	0.178893	0.305717	0.562478	0.284031	0.185643	0.0523579	0.18364	0.203064	0.214533	0.3405	0.228068	0.208796	0.222679	0.179631	0.262379	0.411481	0.385247	0.376029	0.355301	0.344066	0.38836	0.433441	0.398594	0.282593	0.380734	0.288385	0.309858	0.294896	0.226067	0.210907
	57.551	0.393132	0.291162	0.378749	0.240271	0.346363	0.209489	0.329004	0.227025	0.16358	0.153483	0.415969	0.402777	0.40163	0.332657	0.497498	0.105184	0.447221	0.44431	0.183175	0.299961	0.561203	0.281493	0.186695	0.0564791	0.182114	0.208537	0.209531	0.339155	0.229848	0.210313	0.215002	0.174829	0.264638	0.411623	0.379651	0.379681	0.357627	0.343296	0.387078	0.434918	0.397153	0.286492	0.37967	0.294742	0.315578	0.292458	0.225806	0.214153
	57.9592	0.391291	0.28983	0.375831	0.238993	0.342891	0.204802	0.328335	0.228763	0.164607	0.162055	0.413471	0.403714	0.405979	0.328696	0.488769	0.102714	0.443813	0.441163	0.187319	0.294737	0.559792	0.278171	0.187954	0.0603408	0.180643	0.214012	0.204483	0.33785	0.23182	0.211886	0.207054	0.17007	0.266874	0.411736	0.374171	0.382951	0.359994	0.342507	0.385875	0.436074	0.395757	0.290375	0.378709	0.300906	0.321125	0.289909	0.225317	0.217329
	58.3674	0.389295	0.288326	0.372935	0.237845	0.339305	0.200441	0.327737	0.2302	0.165761	0.170732	0.410811	0.404454	0.410048	0.324793	0.47916	0.100434	0.44034	0.437651	0.191288	0.290056	0.558238	0.274128	0.189387	0.0639583	0.179236	0.219438	0.199414	0.33658	0.233935	0.213492	0.198867	0.165354	0.269063	0.411811	0.3688	0.385802	0.362365	0.341663	0.384724	0.436892	0.394383	0.294194	0.377845	0.306856	0.32648	0.28725	0.224609	0.220402
	58.7755	0.387138	0.286666	0.370074	0.236851	0.335624	0.196443	0.327191	0.231332	0.167029	0.179473	0.40798	0.405025	0.413819	0.320956	0.468745	0.0983369	0.436817	0.43383	0.19505	0.285933	0.556537	0.269465	0.190968	0.0673122	0.177928	0.224774	0.194354	0.335343	0.236165	0.215132	0.190501	0.160698	0.271187	0.411869	0.363528	0.388218	0.364721	0.340768	0.383637	0.437362	0.393031	0.297939	0.377078	0.312577	0.331638	0.28448	0.223691	0.223343
	59.1837	0.384809	0.284826	0.367236	0.235986	0.331849	0.192833	0.326653	0.232144	0.168366	0.188237	0.404963	0.405422	0.417271	0.317187	0.4576	0.0964178	0.433251	0.429734	0.198575	0.282352	0.55468	0.264283	0.192656	0.070408	0.176735	0.229968	0.189323	0.334131	0.238451	0.216786	0.182002	0.156109	0.273228	0.411908	0.358338	0.390165	0.36703	0.339796	0.382593	0.43747	0.391684	0.301572	0.376401	0.318054	0.336592	0.281598	0.222569	0.22612
	59.5918	0.382303	0.282817	0.364429	0.235251	0.328002	0.189631	0.326093	0.232631	0.169761	0.196982	0.401746	0.40567	0.420387	0.313494	0.445809	0.0946693	0.429653	0.425426	0.201836	0.279298	0.552662	0.258714	0.194418	0.0732418	0.175676	0.23498	0.184347	0.332942	0.240767	0.218448	0.17343	0.151604	0.275163	0.411931	0.353219	0.391636	0.36927	0.338735	0.381588	0.437207	0.39033	0.305073	0.375809	0.323274	0.341341	0.278606	0.221255	0.228707
	60	0.379631	0.280638	0.361648	0.234651	0.324089	0.186845	0.325472	0.232806	0.171172	0.205671	0.398324	0.405782	0.423151	0.309881	0.433478	0.0930918	0.426037	0.420964	0.204809	0.276734	0.550479	0.252904	0.196217	0.0758003	0.174778	0.239763	0.179455	0.33177	0.243063	0.22011	0.164857	0.147203	0.276991	0.411948	0.348152	0.392609	0.371416	0.337583	0.38062	0.43657	0.388965	0.308425	0.3753	0.328227	0.345888	0.275503	0.21976	0.231074
	60.4082	0.376797	0.278285	0.358888	0.234162	0.320127	0.184477	0.324758	0.232666	0.172579	0.214269	0.394685	0.405769	0.42555	0.306353	0.42071	0.0916783	0.422415	0.41641	0.207474	0.274616	0.548124	0.247013	0.198014	0.0780942	0.174041	0.244279	0.174675	0.330612	0.245302	0.221759	0.156348	0.142924	0.278697	0.411948	0.343122	0.393079	0.373442	0.336309	0.379665	0.435558	0.38757	0.311598	0.37487	0.332902	0.350234	0.272289	0.218099	0.233197
	60.8163	0.373829	0.275784	0.356156	0.233813	0.316131	0.182522	0.323935	0.232247	0.173958	0.222747	0.390833	0.405659	0.427575	0.302919	0.407637	0.0904234	0.418806	0.411842	0.209815	0.272898	0.545598	0.24123	0.19978	0.0801004	0.173491	0.248496	0.170049	0.329469	0.247455	0.223396	0.148002	0.138801	0.280289	0.411944	0.338114	0.393045	0.375332	0.334926	0.378737	0.434179	0.386148	0.314591	0.37452	0.337293	0.354388	0.268966	0.21629	0.235054
	61.2245	0.370743	0.273127	0.353438	0.233573	0.312112	0.180968	0.322981	0.231554	0.175278	0.23108	0.386764	0.405452	0.429217	0.299581	0.39439	0.0893168	0.415223	0.40732	0.211818	0.271512	0.542898	0.235735	0.201477	0.081832	0.173117	0.252385	0.165613	0.328339	0.249475	0.225005	0.139906	0.134854	0.281768	0.411919	0.333116	0.3925	0.377059	0.333402	0.377806	0.43244	0.384681	0.317375	0.374245	0.341392	0.358352	0.265535	0.214353	0.236623
	61.6327	0.367567	0.270348	0.350744	0.233466	0.308092	0.179799	0.321901	0.230623	0.176534	0.239243	0.382484	0.405178	0.430476	0.296348	0.381119	0.0883401	0.411685	0.402934	0.213475	0.270408	0.540029	0.230737	0.20308	0.0832759	0.172923	0.255935	0.161415	0.327224	0.251348	0.226589	0.132182	0.131124	0.28314	0.411879	0.328119	0.391466	0.37861	0.331745	0.376879	0.430358	0.383169	0.319952	0.374041	0.345195	0.362137	0.261999	0.212309	0.237887
	62.0408	0.364326	0.267447	0.348059	0.233478	0.304075	0.178987	0.320691	0.22947	0.177695	0.247211	0.378001	0.404835	0.431347	0.29322	0.367979	0.0874753	0.408199	0.398748	0.214776	0.269512	0.536991	0.226425	0.204555	0.0844348	0.17289	0.259131	0.157493	0.32612	0.253032	0.228139	0.124948	0.127639	0.284414	0.411812	0.323113	0.389941	0.379966	0.32994	0.375939	0.427945	0.381605	0.322305	0.373899	0.348697	0.365748	0.258363	0.210178	0.238825
	62.449	0.361036	0.26445	0.34539	0.233603	0.300085	0.178506	0.319365	0.22811	0.178763	0.254957	0.373317	0.40444	0.431832	0.2902	0.355127	0.0866925	0.404773	0.394841	0.215717	0.26877	0.533787	0.222986	0.205876	0.0853174	0.172993	0.261974	0.153883	0.325024	0.254514	0.229651	0.118342	0.124432	0.285587	0.411706	0.318099	0.387952	0.38111	0.327979	0.374975	0.425212	0.379976	0.32443	0.373804	0.351895	0.369189	0.254632	0.207983	0.239421
	62.8571	0.35772	0.261375	0.342727	0.233851	0.296129	0.178319	0.317935	0.226569	0.179723	0.26245	0.36845	0.403996	0.431931	0.287284	0.342734	0.0859662	0.401407	0.391283	0.216292	0.268119	0.530421	0.220587	0.207016	0.0859148	0.173209	0.264464	0.150616	0.323929	0.255768	0.231122	0.112517	0.121542	0.286664	0.411556	0.313075	0.385518	0.382032	0.325868	0.373987	0.422171	0.378285	0.326325	0.373739	0.354787	0.372467	0.250813	0.20574	0.239658
	63.2653	0.354385	0.258229	0.340065	0.234187	0.29222	0.178387	0.316407	0.224842	0.180571	0.269655	0.363402	0.403497	0.431642	0.284464	0.330956	0.0852646	0.398091	0.388134	0.216496	0.267503	0.526892	0.219351	0.207945	0.0862506	0.173489	0.266602	0.147709	0.322822	0.256774	0.232543	0.107617	0.118994	0.287631	0.411335	0.308045	0.38266	0.382713	0.323586	0.372949	0.418827	0.376511	0.327975	0.37368	0.357371	0.37558	0.246913	0.203465	0.239516
	63.6735	0.351045	0.255046	0.337405	0.234632	0.28837	0.178668	0.314798	0.222955	0.181309	0.276535	0.358191	0.402955	0.430966	0.281733	0.319959	0.0845607	0.394815	0.385462	0.216325	0.266879	0.523205	0.219373	0.208641	0.0863155	0.173805	0.268394	0.145174	0.321693	0.257528	0.233915	0.103798	0.116827	0.288483	0.41104	0.303018	0.379416	0.383147	0.321152	0.37187	0.415187	0.374658	0.329391	0.373604	0.359646	0.37853	0.242943	0.201171	0.238982
	64.0816	0.347703	0.251823	0.33473	0.235145	0.284584	0.179113	0.313103	0.220901	0.181921	0.283052	0.352826	0.40235	0.429901	0.279077	0.30989	0.0838315	0.391562	0.383302	0.215771	0.266196	0.519355	0.220676	0.209074	0.0861292	0.174104	0.269836	0.143005	0.320526	0.258004	0.235226	0.101174	0.115063	0.289205	0.410639	0.298003	0.375805	0.383315	0.318546	0.37072	0.411251	0.372711	0.330554	0.373484	0.361611	0.381312	0.238913	0.198865	0.238038
	64.4898	0.344368	0.248596	0.332044	0.235734	0.280876	0.179676	0.311334	0.218698	0.182422	0.28917	0.347324	0.40169	0.428448	0.276483	0.300888	0.083056	0.388314	0.381705	0.214833	0.265429	0.515344	0.223252	0.209229	0.0856951	0.174355	0.270932	0.141195	0.319308	0.25821	0.236476	0.0998395	0.113735	0.289784	0.410117	0.29302	0.371876	0.383213	0.315781	0.369504	0.407026	0.370669	0.331473	0.373296	0.363268	0.383922	0.23484	0.196558	0.236673
	64.898	0.341051	0.245371	0.32933	0.236381	0.277244	0.180308	0.309486	0.216357	0.182791	0.294857	0.341704	0.400957	0.426606	0.273935	0.293075	0.0822244	0.385056	0.380685	0.213503	0.264545	0.511173	0.22702	0.209083	0.0850164	0.17452	0.271679	0.139726	0.318026	0.258128	0.237657	0.0998211	0.11286	0.290213	0.409451	0.288083	0.367655	0.382829	0.312855	0.368209	0.402516	0.368529	0.33214	0.37302	0.364617	0.386352	0.230738	0.194257	0.234875
	65.3061	0.337758	0.242172	0.326586	0.237069	0.273698	0.180965	0.307565	0.213885	0.183037	0.300087	0.335982	0.400147	0.424379	0.27142	0.286538	0.0813249	0.381771	0.380261	0.21178	0.26353	0.50684	0.231872	0.208627	0.0841121	0.174565	0.272077	0.138576	0.316671	0.257768	0.238764	0.10109	0.112455	0.29048	0.408614	0.283219	0.363192	0.382153	0.309765	0.366821	0.39773	0.366285	0.332552	0.372641	0.36566	0.38859	0.226628	0.191971	0.232637
	65.7143	0.334511	0.239027	0.323805	0.237813	0.270237	0.181604	0.30558	0.211313	0.183153	0.304843	0.33019	0.399253	0.421771	0.268925	0.281343	0.0803556	0.378449	0.380432	0.209662	0.262377	0.502351	0.237658	0.207852	0.0829734	0.174474	0.272131	0.137723	0.315238	0.25713	0.239797	0.103562	0.112533	0.29059	0.407593	0.278453	0.358527	0.381182	0.30653	0.365349	0.392681	0.363949	0.33272	0.372149	0.366401	0.390627	0.222531	0.189709	0.229957
	66.1225	0.331317	0.235945	0.320974	0.238577	0.266861	0.18219	0.303539	0.208644	0.183134	0.309113	0.324347	0.398255	0.41879	0.266435	0.277502	0.0793108	0.375081	0.381178	0.207149	0.261083	0.497708	0.244204	0.206755	0.0816257	0.174214	0.271848	0.137144	0.313725	0.256215	0.240746	0.107101	0.11309	0.29054	0.406354	0.273816	0.353704	0.379905	0.303137	0.363768	0.387383	0.361514	0.332632	0.371536	0.366842	0.392445	0.218471	0.18748	0.226831
	66.5306	0.328201	0.232967	0.318096	0.239386	0.263574	0.182696	0.30147	0.205913	0.182988	0.312889	0.31849	0.397155	0.415448	0.263944	0.275001	0.0781862	0.371663	0.382483	0.204248	0.259664	0.492923	0.251335	0.205345	0.0800666	0.173777	0.271247	0.136821	0.312134	0.255046	0.241616	0.111563	0.114129	0.29034	0.404889	0.26934	0.348779	0.378325	0.299611	0.362097	0.381858	0.358999	0.332307	0.3708	0.366992	0.394033	0.214479	0.185295	0.223266
	66.9388	0.325171	0.230097	0.315153	0.240211	0.260369	0.183101	0.299392	0.203124	0.182705	0.316171	0.312649	0.395923	0.411758	0.261437	0.273773	0.076976	0.36819	0.384295	0.200961	0.258129	0.488001	0.258857	0.203624	0.0783148	0.17314	0.270345	0.13673	0.310465	0.253621	0.242395	0.116775	0.115626	0.289996	0.403172	0.265059	0.34379	0.376433	0.295944	0.360315	0.376122	0.356404	0.331737	0.369939	0.366852	0.39537	0.210583	0.183164	0.219263
	67.3469	0.32224	0.22737	0.312153	0.241059	0.257249	0.183392	0.297344	0.200295	0.182305	0.318956	0.306857	0.394559	0.407736	0.258906	0.273716	0.0756672	0.364659	0.386578	0.197299	0.256512	0.482957	0.266598	0.20161	0.0763885	0.172287	0.269174	0.136856	0.308725	0.25197	0.243087	0.122591	0.117567	0.289513	0.401189	0.261011	0.338797	0.374232	0.292152	0.358434	0.370196	0.35374	0.330935	0.368951	0.366433	0.396439	0.206819	0.181098	0.214831
	67.7551	0.319414	0.224795	0.309081	0.24192	0.254204	0.183562	0.295353	0.197435	0.181783	0.321246	0.301152	0.393038	0.403401	0.256342	0.274698	0.0742502	0.361064	0.389263	0.193269	0.254838	0.477801	0.274377	0.199317	0.0742959	0.171205	0.267763	0.137179	0.306915	0.250104	0.243686	0.128862	0.119918	0.288897	0.398929	0.257227	0.33384	0.371721	0.288247	0.356452	0.364095	0.351023	0.329909	0.367833	0.36574	0.39722	0.203222	0.179102	0.209976
	68.1633	0.316687	0.222389	0.305936	0.242771	0.251235	0.18361	0.293454	0.194539	0.181154	0.323037	0.29556	0.391345	0.398768	0.253732	0.276552	0.0727074	0.357397	0.392291	0.188882	0.253148	0.472546	0.282034	0.196762	0.0720731	0.169868	0.266144	0.137678	0.305037	0.248047	0.244187	0.135466	0.122645	0.288142	0.39637	0.253745	0.328968	0.368898	0.284226	0.354363	0.357832	0.348253	0.328658	0.366582	0.364781	0.397691	0.199828	0.177182	0.204707
	68.5714	0.314057	0.220167	0.302714	0.243619	0.248333	0.183537	0.291674	0.191616	0.180428	0.324329	0.290122	0.389468	0.393859	0.251067	0.279108	0.0710279	0.353651	0.395591	0.184148	0.251482	0.467205	0.28942	0.19397	0.0697268	0.168273	0.264351	0.138328	0.303092	0.245826	0.244592	0.142296	0.125709	0.287247	0.393516	0.250589	0.324223	0.36577	0.280117	0.352186	0.351417	0.345452	0.327202	0.365193	0.363565	0.397832	0.196678	0.17534	0.199035
	68.9796	0.311507	0.218123	0.299405	0.24442	0.245492	0.183345	0.290029	0.188646	0.179608	0.325121	0.284859	0.387378	0.388689	0.248331	0.282174	0.0692004	0.349812	0.399082	0.179076	0.24988	0.461789	0.296392	0.19096	0.0672943	0.166393	0.26241	0.1391	0.30108	0.243457	0.244889	0.149249	0.12906	0.286197	0.390345	0.247787	0.319637	0.362332	0.27591	0.349907	0.344856	0.342618	0.325533	0.363662	0.362101	0.397616	0.19381	0.173576	0.192971
	69.3878	0.309025	0.216278	0.296015	0.245184	0.242707	0.18304	0.288536	0.185636	0.178715	0.325415	0.279804	0.385076	0.38328	0.245518	0.285568	0.0672192	0.345876	0.402699	0.17368	0.248394	0.45631	0.302834	0.187764	0.064795	0.164234	0.260352	0.139966	0.299001	0.240981	0.245083	0.156255	0.13266	0.284983	0.386862	0.245358	0.315251	0.358594	0.271633	0.34755	0.338157	0.339771	0.323671	0.36199	0.3604	0.397026	0.191262	0.171888	0.18653
	69.7959	0.306595	0.214611	0.292525	0.24587	0.239966	0.182625	0.287189	0.182572	0.17774	0.325217	0.274979	0.382533	0.377651	0.242613	0.289105	0.0650874	0.341831	0.406353	0.167972	0.247056	0.450779	0.308627	0.184409	0.062253	0.161788	0.258194	0.140887	0.296857	0.238412	0.245163	0.163232	0.136453	0.28359	0.38306	0.24331	0.311079	0.354553	0.267286	0.34511	0.331325	0.336917	0.321612	0.360178	0.35847	0.396036	0.18907	0.170272	0.179728
	70.2041	0.304204	0.213134	0.288942	0.246471	0.237269	0.182107	0.28599	0.179454	0.1767	0.32454	0.270403	0.379751	0.371825	0.239611	0.292614	0.0628089	0.337676	0.409981	0.161966	0.245917	0.445209	0.313685	0.180934	0.0597067	0.159063	0.255961	0.141834	0.294651	0.235789	0.245128	0.170129	0.1404	0.282006	0.378939	0.24165	0.30715	0.350217	0.26288	0.342602	0.324369	0.334067	0.319366	0.358234	0.356324	0.394625	0.187268	0.168729	0.172586
	70.6122	0.301845	0.211831	0.285255	0.246974	0.234601	0.181491	0.284923	0.176289	0.17559	0.323406	0.2661	0.376717	0.365828	0.236507	0.295943	0.0603994	0.333416	0.413503	0.155682	0.245005	0.439614	0.317923	0.177377	0.0571716	0.156079	0.25367	0.142777	0.292393	0.233135	0.244978	0.176887	0.144452	0.280229	0.374511	0.24037	0.303469	0.34559	0.258433	0.34004	0.3173	0.33124	0.316943	0.356174	0.353973	0.392774	0.185884	0.167256	0.16513
	71.0204	0.299508	0.210694	0.281463	0.247348	0.231961	0.180788	0.283975	0.173074	0.174412	0.321842	0.262077	0.373424	0.359687	0.233297	0.298946	0.0578714	0.329056	0.416852	0.149142	0.244353	0.434006	0.321276	0.173784	0.0546977	0.152845	0.25134	0.143693	0.290091	0.23048	0.244706	0.183463	0.148568	0.278251	0.369774	0.239463	0.300043	0.340676	0.25394	0.337427	0.310133	0.32844	0.314342	0.354014	0.351429	0.390464	0.184942	0.165856	0.157386
	71.4286	0.297199	0.209723	0.277565	0.247609	0.22934	0.180009	0.283134	0.169836	0.173174	0.319886	0.258355	0.369881	0.353436	0.229986	0.301509	0.0552435	0.324614	0.419971	0.142376	0.243985	0.428406	0.323695	0.170207	0.0523119	0.149398	0.248995	0.14457	0.287763	0.227858	0.244318	0.189826	0.152713	0.276084	0.364755	0.238903	0.296872	0.335488	0.24943	0.334794	0.302889	0.325692	0.311584	0.351778	0.348707	0.387681	0.184459	0.164532	0.14939
	71.8367	0.294916	0.20889	0.273552	0.247713	0.226733	0.179172	0.282381	0.166577	0.171867	0.317578	0.254933	0.366076	0.347109	0.226575	0.303523	0.0525318	0.320106	0.422792	0.135417	0.243908	0.422829	0.325136	0.166694	0.0500631	0.145752	0.246656	0.145399	0.285422	0.225284	0.243806	0.195935	0.156845	0.273731	0.35946	0.238668	0.29394	0.330029	0.244892	0.332139	0.295586	0.322999	0.308663	0.34949	0.34582	0.384409	0.184444	0.16329	0.141175
	72.2449	0.292665	0.208201	0.269433	0.247679	0.224139	0.178297	0.281714	0.163331	0.170509	0.314965	0.251819	0.362026	0.340747	0.223076	0.304911	0.0497498	0.315556	0.425275	0.128309	0.244134	0.417297	0.32558	0.163307	0.0480046	0.141939	0.244353	0.146184	0.28309	0.222797	0.243181	0.201775	0.16094	0.271208	0.353919	0.238723	0.291241	0.324313	0.24035	0.329495	0.28825	0.320382	0.305604	0.347175	0.342784	0.380639	0.1849	0.162137	0.132784
	72.6531	0.29045	0.207624	0.265194	0.247478	0.221549	0.177408	0.281117	0.160112	0.169091	0.312094	0.24901	0.357725	0.33439	0.219493	0.305603	0.0469137	0.310986	0.427366	0.121102	0.244649	0.411831	0.325002	0.160095	0.0461786	0.137982	0.242111	0.146927	0.280781	0.220405	0.242436	0.207318	0.164961	0.268529	0.348156	0.239029	0.288739	0.31835	0.235805	0.326869	0.2809	0.317849	0.302408	0.344857	0.339613	0.376362	0.185818	0.161082	0.124258
	73.0612	0.288271	0.207157	0.260848	0.247103	0.218969	0.176529	0.28059	0.156946	0.167631	0.309015	0.246495	0.353187	0.328081	0.215838	0.305544	0.0440337	0.306418	0.429033	0.113858	0.245444	0.40645	0.323401	0.157115	0.0446538	0.133899	0.239956	0.147634	0.278512	0.218135	0.24158	0.21255	0.168883	0.265705	0.342197	0.239548	0.286418	0.312153	0.231262	0.324281	0.273558	0.315405	0.299088	0.342556	0.336323	0.371571	0.187185	0.160133	0.115651
	73.4694	0.286131	0.206776	0.256387	0.246551	0.21639	0.175686	0.280121	0.15386	0.16613	0.305777	0.244264	0.348421	0.321865	0.212121	0.304701	0.0411295	0.301873	0.430243	0.10665	0.246488	0.401176	0.320777	0.154416	0.0434671	0.129722	0.237914	0.14831	0.276296	0.216	0.240613	0.217454	0.172677	0.262753	0.336086	0.240232	0.284235	0.305738	0.22674	0.321755	0.266242	0.313065	0.295661	0.34029	0.332928	0.366266	0.188978	0.159296	0.107019
	73.8776	0.284021	0.206458	0.251811	0.245789	0.213819	0.174903	0.2797	0.15087	0.164595	0.302425	0.242293	0.343432	0.315785	0.20835	0.303035	0.0382205	0.297365	0.430968	0.0995687	0.247748	0.396024	0.317138	0.152041	0.0426684	0.125463	0.236	0.148951	0.274141	0.214006	0.239538	0.222012	0.176313	0.259677	0.329846	0.241038	0.282154	0.299117	0.222228	0.319292	0.258969	0.31082	0.292128	0.338072	0.329445	0.360442	0.191168	0.158578	0.0984308
	74.2857	0.281942	0.206195	0.247126	0.244832	0.211255	0.174199	0.279315	0.148015	0.163039	0.299009	0.240562	0.338245	0.309886	0.204536	0.300535	0.0353395	0.292914	0.431199	0.0927267	0.249183	0.391013	0.312507	0.15003	0.0422856	0.121163	0.234231	0.149552	0.272057	0.212166	0.238363	0.226217	0.179767	0.256492	0.32353	0.241918	0.280135	0.292312	0.217754	0.316929	0.251756	0.308683	0.288513	0.335917	0.325889	0.354107	0.193719	0.157984	0.0899746
	74.6939	0.279884	0.205949	0.242322	0.24364	0.208697	0.17359	0.278938	0.145309	0.161453	0.295576	0.239034	0.332864	0.304211	0.200687	0.29718	0.0325317	0.288531	0.430912	0.0862606	0.250737	0.386153	0.306905	0.148409	0.0423212	0.116845	0.232608	0.150098	0.270047	0.210469	0.237086	0.230045	0.183007	0.253201	0.317169	0.242824	0.278127	0.285336	0.213305	0.314661	0.244617	0.306644	0.284813	0.333833	0.322275	0.347263	0.196591	0.157518	0.0817581
	75.102	0.277848	0.205719	0.237411	0.242225	0.206155	0.173087	0.27855	0.142792	0.159853	0.292177	0.237682	0.327324	0.298804	0.196818	0.292972	0.0298577	0.284232	0.430115	0.080344	0.252367	0.381457	0.300376	0.147202	0.0427811	0.112551	0.231134	0.150575	0.268117	0.208924	0.23572	0.233494	0.186016	0.249815	0.310812	0.243713	0.276094	0.278211	0.208902	0.312517	0.237572	0.304704	0.281051	0.331834	0.318618	0.339921	0.199742	0.157185	0.0739283
	75.5102	0.275836	0.20547	0.23238	0.240571	0.203625	0.172696	0.278114	0.14049	0.158228	0.288864	0.236467	0.321638	0.293706	0.192939	0.287916	0.0274028	0.280034	0.428799	0.0751817	0.254004	0.376935	0.292961	0.146416	0.0436275	0.108331	0.2298	0.150967	0.26627	0.207511	0.234265	0.236546	0.188763	0.24635	0.304507	0.244541	0.273979	0.270958	0.204547	0.310501	0.230644	0.302859	0.277233	0.329931	0.314933	0.332094	0.203125	0.156993	0.0666755
	75.9184	0.273852	0.205197	0.227239	0.238673	0.201118	0.17242	0.277602	0.13844	0.156581	0.285693	0.235351	0.315839	0.288959	0.189067	0.282025	0.0252682	0.275952	0.426981	0.0710105	0.255597	0.372592	0.284723	0.146055	0.0448347	0.104225	0.228598	0.151263	0.26451	0.206223	0.232731	0.239195	0.191232	0.242821	0.298295	0.245268	0.271747	0.2636	0.200244	0.308624	0.223858	0.3011	0.273369	0.328138	0.311235	0.323799	0.206695	0.156947	0.060255
	76.3265	0.271913	0.204883	0.221985	0.236552	0.198635	0.172259	0.276981	0.136682	0.154912	0.282719	0.234303	0.30996	0.284604	0.185221	0.275334	0.0235813	0.27201	0.424672	0.0680749	0.257084	0.368439	0.275728	0.146107	0.046357	0.1003	0.227515	0.151458	0.262844	0.205045	0.231128	0.241438	0.193408	0.239259	0.292236	0.245855	0.269351	0.256165	0.196014	0.306905	0.217246	0.29943	0.269481	0.32647	0.307537	0.31506	0.210405	0.157057	0.054988
	76.7347	0.270033	0.204513	0.216616	0.23419	0.196186	0.17221	0.276221	0.135241	0.153212	0.279999	0.233282	0.304026	0.280678	0.181418	0.267875	0.0224675	0.268226	0.42189	0.0665877	0.258404	0.364478	0.266052	0.146555	0.048143	0.0965959	0.226538	0.151551	0.261277	0.20395	0.229461	0.243267	0.195275	0.23569	0.286366	0.246274	0.266751	0.248679	0.191847	0.305336	0.21084	0.297833	0.265572	0.324938	0.303854	0.3059	0.214209	0.157334	0.0512402
	77.1429	0.268239	0.204093	0.211143	0.231628	0.193775	0.172274	0.275309	0.134162	0.151495	0.277588	0.232261	0.298085	0.277216	0.177681	0.259708	0.022037	0.264622	0.418672	0.0666819	0.259508	0.360716	0.25579	0.147375	0.0501581	0.0931787	0.225659	0.151551	0.259814	0.202928	0.227747	0.244692	0.196828	0.232158	0.280748	0.246494	0.263919	0.241178	0.187775	0.303941	0.204682	0.296314	0.261673	0.323556	0.3002	0.296352	0.218065	0.157789	0.049348
	77.551	0.266549	0.203603	0.205557	0.228857	0.191408	0.172449	0.274226	0.133457	0.149747	0.275537	0.231205	0.292159	0.27425	0.174031	0.250891	0.0223411	0.261217	0.415037	0.0683671	0.260336	0.357156	0.24503	0.148531	0.0523435	0.0900924	0.224864	0.151465	0.258459	0.201942	0.22599	0.245704	0.198055	0.228702	0.27542	0.246494	0.260816	0.233693	0.183793	0.302705	0.198808	0.294858	0.257789	0.322331	0.296585	0.28645	0.221929	0.158432	0.0494892
	77.9592	0.264986	0.20306	0.199874	0.225912	0.189098	0.172735	0.272974	0.133154	0.147987	0.273888	0.230092	0.286299	0.271804	0.17049	0.241498	0.0233605	0.258027	0.411038	0.0715351	0.26085	0.3538	0.233888	0.14999	0.0546698	0.0873834	0.224148	0.151306	0.257214	0.200981	0.224207	0.246315	0.198956	0.225366	0.270432	0.246259	0.257428	0.226266	0.179924	0.301641	0.193258	0.293462	0.253947	0.321267	0.293024	0.276233	0.225765	0.159276	0.0515991
	78.3674	0.26357	0.202449	0.194088	0.222808	0.186845	0.173131	0.271551	0.133253	0.146213	0.272678	0.228898	0.280531	0.269897	0.167076	0.231614	0.0250148	0.255062	0.406706	0.0759859	0.260999	0.350649	0.222475	0.151707	0.0570906	0.0850955	0.223501	0.15108	0.256077	0.20001	0.222407	0.246526	0.199524	0.222198	0.265828	0.245775	0.253723	0.218939	0.176182	0.300741	0.188067	0.292119	0.250167	0.320363	0.289525	0.265746	0.229535	0.160326	0.0553888
	78.7755	0.262311	0.201785	0.188212	0.219559	0.184664	0.173638	0.269968	0.133749	0.144432	0.271929	0.227598	0.274897	0.268538	0.163806	0.221323	0.0271912	0.252325	0.402094	0.0814863	0.260753	0.347698	0.210921	0.15364	0.0595698	0.0832506	0.222914	0.150788	0.255041	0.199009	0.220602	0.24634	0.199757	0.219235	0.261633	0.245039	0.249695	0.211754	0.172575	0.299996	0.18327	0.290814	0.246464	0.319608	0.286099	0.255037	0.233207	0.161588	0.0604758
	79.1837	0.261223	0.201068	0.182248	0.216208	0.182556	0.174251	0.268233	0.134626	0.142658	0.271656	0.226181	0.269437	0.267729	0.160697	0.21073	0.02978	0.249816	0.397252	0.0878027	0.26008	0.344945	0.19937	0.155743	0.0620821	0.0818816	0.222377	0.150428	0.254098	0.197957	0.218804	0.245766	0.199654	0.21652	0.257891	0.244046	0.245329	0.204764	0.169136	0.29941	0.178897	0.289548	0.242869	0.318995	0.282755	0.244164	0.236751	0.163065	0.0664878
	79.5918	0.260305	0.200298	0.176198	0.212752	0.180529	0.174968	0.266351	0.135845	0.140881	0.271861	0.224622	0.264178	0.267461	0.157759	0.199937	0.0326802	0.247523	0.392227	0.0947289	0.258953	0.342376	0.187975	0.157972	0.0645862	0.0809872	0.221873	0.149986	0.253232	0.196825	0.217021	0.244798	0.199208	0.214077	0.254607	0.242803	0.240618	0.198015	0.165867	0.298953	0.17497	0.2883	0.23939	0.318505	0.279496	0.233183	0.240141	0.164752	0.0731222
	80	0.259563	0.199493	0.170078	0.20925	0.17859	0.17578	0.264332	0.137374	0.139119	0.272535	0.222916	0.259168	0.267717	0.155004	0.189067	0.0358165	0.245439	0.387084	0.102091	0.257361	0.339982	0.176916	0.160285	0.0670713	0.0805763	0.221386	0.149452	0.25243	0.195605	0.215267	0.24345	0.198425	0.211939	0.251807	0.241314	0.235567	0.191566	0.162806	0.298633	0.171512	0.287071	0.236062	0.318124	0.276332	0.222165	0.243355	0.166646	0.0801479
	80.4082	0.258994	0.198644	0.163882	0.205706	0.176738	0.176676	0.262171	0.139148	0.137359	0.273662	0.221047	0.254429	0.268471	0.152438	0.178253	0.0391247	0.243544	0.381867	0.109743	0.255286	0.337746	0.16638	0.162638	0.0695045	0.0806309	0.220893	0.148808	0.251673	0.194268	0.213545	0.24172	0.197299	0.210122	0.249485	0.239591	0.230172	0.185469	0.15996	0.298418	0.168535	0.285846	0.232894	0.317834	0.273265	0.211185	0.246371	0.168737	0.0873938
	80.8163	0.2586	0.197776	0.15763	0.202171	0.174983	0.177646	0.259873	0.141122	0.135609	0.275216	0.21901	0.250007	0.269692	0.150068	0.167645	0.0425612	0.241825	0.376642	0.11757	0.252731	0.335652	0.156587	0.164998	0.0718762	0.0811289	0.220373	0.148045	0.250947	0.192813	0.21187	0.239616	0.195841	0.208641	0.247637	0.237648	0.224451	0.179781	0.157359	0.298301	0.166053	0.284622	0.229913	0.317621	0.270297	0.200327	0.249173	0.171018	0.0947359
	81.2245	0.258383	0.196883	0.15132	0.198681	0.173317	0.178672	0.257432	0.143227	0.133865	0.27717	0.216804	0.245924	0.271339	0.147901	0.157421	0.0460922	0.240265	0.371458	0.125472	0.249693	0.333683	0.147759	0.167329	0.0741733	0.0820434	0.219803	0.147157	0.250236	0.191223	0.210246	0.237149	0.194054	0.207507	0.246252	0.2355	0.218413	0.17456	0.155025	0.298266	0.16407	0.283398	0.227137	0.317474	0.267431	0.189689	0.251748	0.173477	0.102079
	81.6326	0.258344	0.195988	0.144967	0.195266	0.17175	0.179744	0.254848	0.145403	0.132118	0.279489	0.214425	0.242213	0.273371	0.145937	0.147773	0.0496959	0.238847	0.366372	0.133367	0.246185	0.331818	0.140131	0.169608	0.0763792	0.0833269	0.21916	0.146143	0.249526	0.189496	0.208679	0.234324	0.191951	0.206722	0.245296	0.233171	0.212084	0.169858	0.152969	0.298286	0.162584	0.282164	0.224581	0.317379	0.264668	0.179375	0.254085	0.176103	0.109354
	82.0408	0.258492	0.195099	0.138583	0.191992	0.170273	0.180848	0.252126	0.147596	0.130382	0.282138	0.211886	0.238901	0.275742	0.144182	0.138928	0.0533632	0.237562	0.361437	0.141186	0.242225	0.330043	0.133923	0.171813	0.0784981	0.0849475	0.218431	0.145015	0.24881	0.187636	0.207179	0.231163	0.189549	0.206294	0.244751	0.230678	0.20549	0.16573	0.151228	0.29836	0.161592	0.280933	0.222271	0.317333	0.262006	0.169507	0.256177	0.178885	0.116507
	82.449	0.258825	0.194226	0.132174	0.188874	0.168888	0.181977	0.249271	0.149741	0.128643	0.285081	0.209191	0.235999	0.278405	0.142633	0.131118	0.0570881	0.236394	0.356693	0.148869	0.237832	0.328336	0.129313	0.173929	0.0805102	0.0868469	0.217601	0.143782	0.248076	0.185639	0.205746	0.227672	0.186861	0.206213	0.244566	0.228051	0.198661	0.162214	0.149797	0.298451	0.16108	0.279695	0.220212	0.317327	0.259445	0.160216	0.258019	0.181811	0.123498
	82.8572	0.259353	0.193396	0.125765	0.185984	0.167591	0.183128	0.246308	0.151799	0.126919	0.28828	0.20636	0.233533	0.281315	0.141291	0.12459	0.060878	0.235333	0.352197	0.156366	0.233046	0.326687	0.126422	0.175949	0.082423	0.0889857	0.216668	0.142463	0.24732	0.183527	0.204391	0.223877	0.183913	0.206478	0.244709	0.225314	0.191647	0.159352	0.148709	0.29856	0.16103	0.278464	0.218431	0.317355	0.256981	0.151649	0.259611	0.184871	0.130296
	83.2653	0.260069	0.192606	0.119359	0.183339	0.166373	0.184298	0.243251	0.153712	0.125206	0.291695	0.203408	0.231495	0.284422	0.14015	0.119565	0.0647378	0.234364	0.347971	0.163631	0.227895	0.325079	0.125267	0.177867	0.084224	0.0913088	0.215624	0.141073	0.246532	0.1813	0.20311	0.219787	0.180721	0.207075	0.245127	0.222497	0.184481	0.157163	0.147959	0.298657	0.161416	0.277241	0.216929	0.31741	0.254612	0.143957	0.260954	0.188049	0.136877
	83.6735	0.260967	0.191887	0.112986	0.180985	0.165236	0.185494	0.240135	0.155446	0.12351	0.295289	0.200358	0.229898	0.287682	0.1392	0.116216	0.0686801	0.233473	0.344058	0.170629	0.222432	0.323498	0.125779	0.179686	0.085911	0.0937663	0.214475	0.139625	0.245705	0.178989	0.201911	0.215423	0.177311	0.207987	0.245771	0.219629	0.177228	0.15566	0.147556	0.298733	0.162207	0.276028	0.215723	0.317481	0.252332	0.137296	0.262053	0.191332	0.143223
	84.0816	0.262036	0.191235	0.106657	0.178952	0.164165	0.186719	0.236987	0.156956	0.121843	0.299019	0.197236	0.228728	0.291049	0.138432	0.114639	0.0727138	0.232643	0.340474	0.177327	0.216705	0.321933	0.127783	0.181406	0.0874854	0.0963143	0.213222	0.138129	0.244832	0.176612	0.20079	0.210806	0.173705	0.209192	0.246596	0.216737	0.169937	0.154838	0.147502	0.298774	0.163362	0.274838	0.214818	0.31756	0.250137	0.131816	0.262916	0.194701	0.149316
	84.4898	0.26325	0.190668	0.100397	0.177246	0.163158	0.187983	0.233839	0.158203	0.120197	0.302841	0.194059	0.227972	0.29448	0.137829	0.114814	0.076846	0.231852	0.337233	0.183699	0.210772	0.320368	0.13105	0.183035	0.0889345	0.0988971	0.211864	0.13659	0.243901	0.174193	0.199746	0.205943	0.169923	0.210655	0.247538	0.213854	0.162677	0.154676	0.147779	0.298755	0.164837	0.273666	0.21421	0.317632	0.24802	0.127642	0.26355	0.198136	0.155148
	84.898	0.264591	0.19019	0.0942325	0.175902	0.162202	0.18929	0.23072	0.159154	0.118588	0.306713	0.190861	0.227617	0.297931	0.137376	0.11663	0.081084	0.231082	0.334346	0.18972	0.204699	0.318795	0.135309	0.184579	0.0902704	0.101483	0.210406	0.135013	0.242904	0.171772	0.198779	0.200863	0.165995	0.212345	0.248561	0.211003	0.15552	0.155143	0.148389	0.29868	0.166584	0.272528	0.213907	0.317686	0.245974	0.124863	0.263969	0.201615	0.160704
	85.3061	0.266024	0.189797	0.0881824	0.174895	0.161289	0.190645	0.227647	0.159764	0.117	0.310589	0.187658	0.227629	0.301359	0.137052	0.119872	0.0854263	0.230309	0.331799	0.19537	0.19855	0.317196	0.140285	0.186044	0.0914805	0.104025	0.208842	0.133398	0.241829	0.169372	0.19788	0.195576	0.161939	0.214212	0.2496	0.20821	0.148535	0.156188	0.149296	0.298518	0.16855	0.271416	0.213888	0.317711	0.243991	0.123511	0.264182	0.205112	0.165976
	85.7143	0.267522	0.189501	0.082286	0.174248	0.160411	0.192051	0.224644	0.16001	0.115443	0.314426	0.184479	0.227995	0.304725	0.136839	0.12429	0.0898757	0.229517	0.329593	0.200631	0.192405	0.315561	0.145724	0.187441	0.0925775	0.106499	0.207171	0.131752	0.240668	0.167042	0.197047	0.190109	0.157789	0.216212	0.250617	0.205495	0.141815	0.157757	0.150495	0.298276	0.170687	0.270344	0.214156	0.317698	0.242064	0.123563	0.264208	0.208604	0.170955
	86.1225	0.269056	0.189282	0.0765647	0.173926	0.159551	0.193507	0.221716	0.159846	0.11391	0.318185	0.181347	0.228669	0.30799	0.136716	0.129601	0.0944272	0.228689	0.327694	0.205482	0.186334	0.313878	0.151392	0.188777	0.0935615	0.108879	0.205387	0.130085	0.239415	0.164809	0.19627	0.184483	0.153569	0.218292	0.251562	0.202875	0.135437	0.15978	0.151942	0.297934	0.172942	0.269311	0.214683	0.317644	0.240183	0.124927	0.264059	0.212067	0.175631
	86.5306	0.270599	0.189151	0.0710674	0.173921	0.158706	0.195014	0.218875	0.159258	0.112395	0.321827	0.178284	0.229633	0.311118	0.136664	0.135544	0.0990807	0.227814	0.326084	0.209909	0.180423	0.312135	0.157097	0.190063	0.0944373	0.111147	0.203488	0.128413	0.238067	0.162722	0.195544	0.178724	0.149315	0.220401	0.252391	0.200364	0.129503	0.16219	0.153614	0.297491	0.17527	0.268318	0.215456	0.317546	0.238341	0.127467	0.263752	0.215478	0.179999
	86.9388	0.272134	0.189087	0.0658284	0.174207	0.157857	0.196568	0.216125	0.158218	0.110909	0.325322	0.175314	0.230846	0.314076	0.136668	0.141879	0.103835	0.226887	0.324725	0.213894	0.174749	0.310326	0.162669	0.19131	0.0952207	0.113299	0.201474	0.126761	0.236627	0.160817	0.19486	0.17287	0.145062	0.222492	0.253075	0.197968	0.1241	0.164915	0.155477	0.296947	0.17763	0.267378	0.216452	0.317408	0.236528	0.131013	0.263306	0.218818	0.184052
	87.3469	0.273639	0.189089	0.060902	0.174743	0.156999	0.19817	0.213473	0.156713	0.109441	0.328644	0.172456	0.232275	0.316837	0.136711	0.148396	0.10869	0.225906	0.323574	0.217427	0.169393	0.308442	0.167978	0.192528	0.0959092	0.115317	0.199349	0.125155	0.235099	0.15913	0.194209	0.166947	0.140843	0.224516	0.253566	0.195695	0.119323	0.16788	0.157484	0.296289	0.179987	0.266481	0.217641	0.317235	0.234737	0.135376	0.262737	0.222067	0.187787
	87.7551	0.275106	0.189147	0.0563451	0.175517	0.156119	0.19982	0.210931	0.154745	0.108011	0.331774	0.169735	0.233892	0.319377	0.136782	0.154931	0.11365	0.224877	0.322596	0.220494	0.164435	0.306484	0.172913	0.193731	0.096526	0.117207	0.197123	0.123634	0.233493	0.157704	0.193586	0.161004	0.136703	0.226442	0.253851	0.193543	0.115257	0.17102	0.159614	0.295535	0.182311	0.265641	0.219006	0.317036	0.232959	0.140375	0.262065	0.225211	0.191203
	88.1633	0.276518	0.189245	0.0522153	0.176464	0.155208	0.201521	0.208509	0.152306	0.106614	0.334696	0.167164	0.235653	0.321674	0.136865	0.161336	0.118716	0.223803	0.321734	0.223089	0.159939	0.304447	0.177389	0.194927	0.0970695	0.118957	0.194808	0.122232	0.231817	0.156559	0.192978	0.155076	0.132674	0.228233	0.253892	0.191508	0.111967	0.174262	0.161809	0.294668	0.184575	0.264849	0.220507	0.316814	0.231186	0.145835	0.261308	0.228234	0.194299
	88.5714	0.277865	0.189384	0.0485896	0.177573	0.154259	0.203281	0.20623	0.149417	0.105265	0.3374	0.164765	0.237537	0.323714	0.136952	0.167511	0.123893	0.222693	0.320954	0.225206	0.155974	0.302336	0.181345	0.19613	0.0975579	0.120567	0.192425	0.120987	0.230083	0.155733	0.192384	0.149214	0.128801	0.229872	0.253676	0.189582	0.109511	0.177552	0.164048	0.293708	0.18676	0.264107	0.222127	0.316576	0.22941	0.151602	0.260483	0.231122	0.197075
	88.9796	0.279133	0.189536	0.0455243	0.178782	0.15326	0.205102	0.204107	0.146081	0.103977	0.339877	0.162547	0.239496	0.325483	0.137031	0.173367	0.129179	0.221553	0.320196	0.226845	0.152581	0.300155	0.184724	0.197342	0.0979993	0.12203	0.189992	0.119932	0.228303	0.155233	0.19179	0.143467	0.125114	0.231339	0.253188	0.187754	0.1079	0.180827	0.166282	0.292652	0.188842	0.263412	0.223828	0.316323	0.227624	0.15754	0.25961	0.233861	0.199531
	89.3878	0.2803	0.189707	0.0430922	0.180059	0.15221	0.206995	0.202167	0.142321	0.102748	0.342118	0.160517	0.24151	0.326972	0.137089	0.178846	0.13457	0.220387	0.319422	0.228008	0.149796	0.297907	0.187497	0.198573	0.0984002	0.123337	0.187527	0.119097	0.226486	0.155077	0.191194	0.137886	0.121651	0.232621	0.252408	0.186011	0.107135	0.18404	0.168479	0.291504	0.190802	0.262751	0.225585	0.316051	0.22582	0.163532	0.258704	0.236436	0.201668
	89.7959	0.28135	0.189868	0.0413247	0.181364	0.151097	0.208961	0.200426	0.138153	0.101602	0.344116	0.158684	0.243539	0.328171	0.137118	0.183906	0.140057	0.219202	0.318582	0.2287	0.14763	0.295601	0.189633	0.199819	0.0987805	0.124492	0.185053	0.118508	0.224639	0.155265	0.190585	0.132537	0.118441	0.233712	0.25134	0.184333	0.107167	0.187145	0.170607	0.290282	0.192618	0.262122	0.227372	0.315759	0.223989	0.169483	0.257782	0.238832	0.203485
	90.2041	0.282256	0.190013	0.0402438	0.18264	0.149919	0.211003	0.198897	0.133592	0.100529	0.345862	0.157038	0.245554	0.329073	0.137104	0.188511	0.145622	0.217999	0.317632	0.228926	0.146074	0.293237	0.191122	0.201079	0.0991391	0.125483	0.182581	0.11818	0.22277	0.155785	0.189955	0.127473	0.115509	0.234599	0.249964	0.182703	0.107931	0.190098	0.172622	0.288977	0.194269	0.2615	0.229151	0.315437	0.222126	0.175309	0.256858	0.24103	0.20498
	90.6123	0.282999	0.190128	0.0398212	0.183872	0.148672	0.213119	0.197595	0.128661	0.0995474	0.347346	0.155579	0.247533	0.329671	0.137039	0.192651	0.151246	0.216784	0.316541	0.228697	0.145105	0.290825	0.191956	0.202347	0.0995009	0.126324	0.180128	0.118131	0.220886	0.156631	0.189302	0.12277	0.11288	0.235278	0.248288	0.181096	0.109334	0.192868	0.17451	0.287616	0.195734	0.260884	0.230906	0.315079	0.220223	0.180945	0.255945	0.243017	0.206152
	91.0204	0.283557	0.190187	0.0399979	0.18499	0.147348	0.215298	0.196515	0.12337	0.0986563	0.348558	0.154287	0.24944	0.329959	0.136911	0.19631	0.1569	0.215562	0.315259	0.228018	0.144669	0.288364	0.192135	0.203608	0.0998676	0.127017	0.177703	0.118369	0.218991	0.157767	0.188612	0.118491	0.110567	0.235735	0.246305	0.179491	0.111265	0.195418	0.176224	0.286191	0.196992	0.260246	0.232596	0.314676	0.218273	0.186334	0.255053	0.244776	0.206996
	91.4286	0.283917	0.190192	0.0406893	0.18599	0.145952	0.21753	0.195663	0.117751	0.0978582	0.349491	0.15315	0.251265	0.329932	0.136714	0.199492	0.16256	0.214344	0.313769	0.2269	0.144712	0.285861	0.191677	0.204851	0.100259	0.127578	0.175317	0.118901	0.217093	0.159176	0.187886	0.114714	0.108585	0.235965	0.244017	0.177864	0.113619	0.197724	0.177753	0.284723	0.198028	0.259575	0.234206	0.314224	0.216269	0.191432	0.25419	0.246298	0.207512
	91.8367	0.284073	0.190109	0.0417844	0.186819	0.144474	0.219798	0.195023	0.111818	0.0971673	0.350139	0.152147	0.252977	0.329587	0.136444	0.202201	0.168196	0.213143	0.312032	0.225351	0.145153	0.283319	0.190593	0.206059	0.100687	0.128026	0.172981	0.119732	0.2152	0.160811	0.187111	0.111507	0.106937	0.23596	0.241436	0.176189	0.116274	0.19976	0.179064	0.283219	0.19883	0.258854	0.235701	0.313719	0.214205	0.196202	0.253364	0.247571	0.207697
	92.2449	0.28402	0.189944	0.0431882	0.187464	0.14292	0.222085	0.194589	0.105608	0.0965751	0.350499	0.151252	0.254567	0.328922	0.136096	0.204453	0.173781	0.211975	0.310034	0.223382	0.145914	0.280741	0.18892	0.207215	0.10116	0.128378	0.170706	0.120867	0.213322	0.16264	0.186286	0.108933	0.105623	0.235714	0.238558	0.174446	0.119131	0.201506	0.180137	0.281682	0.199392	0.258058	0.237061	0.313158	0.212077	0.200618	0.252578	0.248593	0.207552
	92.6531	0.283769	0.189674	0.0447908	0.18791	0.141285	0.224371	0.19435	0.0991556	0.0961037	0.350574	0.150447	0.256017	0.32794	0.135673	0.206273	0.179293	0.210862	0.307756	0.221004	0.146908	0.278137	0.186687	0.208302	0.1017	0.128663	0.16851	0.122307	0.211472	0.164619	0.185405	0.107054	0.104638	0.235234	0.235407	0.172609	0.122082	0.202948	0.180962	0.280137	0.199714	0.257182	0.238266	0.312541	0.209878	0.204658	0.251836	0.24936	0.207077
	93.0612	0.283327	0.189298	0.0465185	0.188126	0.139573	0.226639	0.194292	0.0925019	0.0957457	0.35037	0.149702	0.257312	0.326645	0.135173	0.20769	0.184709	0.209823	0.305183	0.21823	0.148047	0.275508	0.183942	0.209301	0.102304	0.128893	0.166408	0.124052	0.209658	0.166699	0.184462	0.105901	0.103964	0.234522	0.231984	0.170662	0.125043	0.204069	0.181507	0.278574	0.199796	0.256197	0.239288	0.311865	0.207604	0.208308	0.251135	0.249873	0.206274
	93.4694	0.282711	0.188813	0.0482909	0.188133	0.137787	0.228875	0.194415	0.0857056	0.095516	0.349897	0.149	0.258449	0.325045	0.134602	0.208753	0.190014	0.208881	0.302318	0.215078	0.149254	0.272867	0.180736	0.210199	0.102993	0.129095	0.164425	0.126104	0.207895	0.168845	0.183459	0.105502	0.103587	0.233601	0.228314	0.168587	0.127936	0.204864	0.181779	0.277021	0.199647	0.255099	0.240122	0.311128	0.205251	0.211559	0.250476	0.250136	0.205148
	93.8776	0.281934	0.188208	0.0500571	0.187896	0.135927	0.231064	0.194712	0.078814	0.0954172	0.349166	0.148314	0.259406	0.323148	0.133961	0.209504	0.195184	0.208054	0.29915	0.211564	0.150444	0.27022	0.17712	0.210976	0.103763	0.12928	0.162578	0.128455	0.20619	0.171003	0.182388	0.105846	0.103476	0.232486	0.224411	0.166369	0.130688	0.205323	0.181749	0.275471	0.199268	0.253863	0.240741	0.310322	0.202815	0.214405	0.249854	0.250151	0.203701
	94.2857	0.281007	0.187499	0.0517722	0.187442	0.134005	0.233196	0.195189	0.0719024	0.0954455	0.348189	0.147626	0.260184	0.320966	0.133251	0.210008	0.200205	0.207357	0.295693	0.207712	0.151556	0.267576	0.173162	0.21162	0.104624	0.12946	0.160892	0.131097	0.204552	0.173142	0.181253	0.106913	0.103606	0.231208	0.220291	0.163999	0.133251	0.205447	0.18142	0.273938	0.198665	0.252478	0.241143	0.30944	0.200294	0.216847	0.249264	0.249922	0.20194
	94.6939	0.279945	0.18667	0.0533989	0.186754	0.132016	0.235258	0.195846	0.0650342	0.0956116	0.346976	0.146917	0.260764	0.318511	0.132477	0.210324	0.205052	0.206804	0.291949	0.203545	0.152519	0.264944	0.168922	0.212112	0.105576	0.129649	0.159384	0.134015	0.202982	0.175214	0.180047	0.108654	0.103939	0.229797	0.215985	0.161469	0.135567	0.205234	0.180785	0.272425	0.19784	0.250933	0.241312	0.308468	0.197683	0.218886	0.248701	0.249451	0.199864
	95.102	0.278751	0.185742	0.0549218	0.185838	0.129975	0.23724	0.19669	0.0582981	0.0958947	0.345537	0.146163	0.261143	0.315793	0.131636	0.210518	0.209698	0.2064	0.287936	0.199087	0.153285	0.262329	0.164474	0.212438	0.106613	0.129848	0.158067	0.137187	0.201481	0.177186	0.178772	0.111002	0.104441	0.228281	0.2115	0.158776	0.137605	0.204684	0.179835	0.270928	0.196791	0.249203	0.241242	0.307389	0.19498	0.220529	0.248155	0.248743	0.19748
	95.5102	0.277436	0.184707	0.0563136	0.184708	0.127883	0.239125	0.197723	0.0517937	0.0963015	0.343876	0.145355	0.261312	0.312825	0.130731	0.210659	0.214117	0.20615	0.283672	0.194364	0.153808	0.259739	0.15989	0.212582	0.10774	0.130073	0.156955	0.140586	0.200044	0.179025	0.177425	0.113888	0.105073	0.226694	0.20687	0.155917	0.139324	0.203807	0.178582	0.269462	0.195516	0.247289	0.240933	0.30619	0.192184	0.221784	0.247618	0.2478	0.194789
[truncated: 422 more rows]
[truncated: 54 more columns]
