# Supplementary material for: Deciphering the actin structure-dependent preferential cooperative binding of cofilin
Source: eLife. 2024 Aug 2;13:RP95257. doi: 10.7554/eLife.95257 (PMC11296705; doi:10.7554/eLife.95257)
Supplement: Figure 4—source data 1. — These data are presented as origin plots in Figure 4A, C and D. [file elife-95257-fig4-data1.xlsx]

## Sheet: Figure 4
Figure 4A	Time (s)	Protomer Pairs (1)	HHP1(nm)	MAD1(nm)		Time (s)	Protomer Pairs (2)	HHP2(nm)	MAD2(nm)		Time (s)	Protomer Pairs (3)	HHP3(nm)	MAD3(nm)		MAD1	Mean MAD1(nm)	SD1	MAD2	Mean MAD2(nm)	SD2	MAD3	Mean MAD3(nm)	SD3		Statistical test:							Figure 4C	Distance (nm)	Data1	Data2	Data3			D1	D2	D3	D4	D5	D6	D7	D8	D9	γ1
	0	6.5	32.4467	4.9918		0	7.5	40.7664	5.43552		0	7.5	39.9344	5.32459		4.9918	5.08316	0.279343	5.43552	5.15913	0.217208	5.32459	5.24016	0.273463		Independent t-Test on Data1 col(MAD1) and col(MAD3):								0	1	1	1.00001		Fitting Line 1	19.2523	12.4315	19.14	3.58089	13.404	1.55767e-05	0.129989	17.415	34.564	0.59554
	0.5	6.5	33.2787	5.1198		0.5	6.5	33.2787	5.1198		0.5	8.5	39.1024	4.60029		5.1198			5.1198			4.60029				Data	Mean	Variance	N					0.408163	0.999368	0.999007	0.998143		Fitting Line 2	21.1782	10.7438	21.4529	1.09016	9.63813	0.00107417	-0.128661	15.1761	36.0304	0.334852
	1	6.5	32.4467	4.9918		1	8.5	38.2705	4.50241		1	6.5	32.4467	4.9918		4.9918			4.50241			4.9918				------------------------------------------------------------								0.816327	0.998178	0.996877	0.994206		Fitting Line 3	20.7934	1.90171	8.32709	5.14802	11.8515	-17.4662	35.7025	12.2703	20.3807	3.29598
	1.5	6.5	33.2787	5.1198		1.5	7.5	39.1025	5.21366		1.5	5.5	28.7029	5.2187		5.1198			5.21366			5.2187				MAD1	5.08316	0.08055	32					1.22449	0.99666	0.993885	0.988808
	2	6.5	34.5266	5.31179		2	7.5	37.8545	5.04727		2	6.5	33.2787	5.1198		5.31179			5.04727			5.1198				MAD3	5.24016	0.07719	32					1.63265	0.994547	0.989752	0.981536
	2.5	6.5	34.1106	5.24779		2.5	7.5	37.8545	5.04727		2.5	6.5	33.6947	5.1838		5.24779			5.04727			5.1838				------------------------------------------------------------								2.04082	0.992089	0.984794	0.973059
	3	6.5	32.0307	4.92781		3	8.5	38.6865	4.55135		3	7.5	41.1824	5.49098		4.92781			4.55135			5.49098				t = 2.23614								2.44898	0.989174	0.978916	0.963271
	3.5	6.5	33.2787	5.1198		3.5	7.5	38.2705	5.10273		3.5	6.5	34.9426	5.37579		5.1198			5.10273			5.37579				p = 0.02895								2.85714	0.985899	0.972257	0.952521
	4	6.5	33.2787	5.1198		4	7.5	37.4385	4.9918		4	6.5	36.1906	5.56778		5.1198			4.9918			5.56778				At the 0.05 level,								3.26531	0.982297	0.964882	0.940967
	4.5	5.5	32.8627	5.97504		4.5	7.5	39.5184	5.26913		4.5	6.5	33.6947	5.1838		5.97504			5.26913			5.1838				the two means are significantly different.								3.67347	0.978343	0.95678	0.928651
	5	7.5	37.4385	4.9918		5	6.5	34.5266	5.31179		5	6.5	36.1906	5.56778		4.9918			5.31179			5.56778												4.08163	0.974135	0.948078	0.915826
	5.5	6.5	33.2787	5.1198		5.5	6.5	33.6947	5.1838		5.5	7.5	41.5984	5.54645		5.1198			5.1838			5.54645												4.4898	0.96961	0.938715	0.90239
	6	6.5	32.4467	4.9918		6	7.5	38.2705	5.10273		6	7.5	41.5984	5.54645		4.9918			5.10273			5.54645				Independent t-Test on Data1 col(MAD1) and col(MAD2):								4.89796	0.964851	0.92879	0.88854
	6.5	9.5	39.5184	4.15984		6.5	7.5	38.6865	5.1582		6.5	7.5	41.1824	5.49098		4.15984			5.1582			5.49098				Data	Mean	Variance	N					5.30612	0.959834	0.918287	0.874222
	7	6.5	33.6947	5.1838		7	7.5	39.5184	5.26913		7	7.5	34.9426	4.65902		5.1838			5.26913			4.65902				------------------------------------------------------------								5.71429	0.954586	0.907245	0.859522
	7.5	7.5	38.2705	5.10273		7.5	7.5	39.9344	5.32459		7.5	6.5	34.9426	5.37579		5.10273			5.32459			5.37579				MAD1	5.08316	0.08055	32					6.12245	0.949146	0.89573	0.844531
	8	7.5	37.8545	5.04727		8	6.5	35.4245	5.44992		8	7.5	39.8686	5.31581		5.04727			5.44992			5.31581				MAD2	5.15913	0.0487	32					6.53061	0.9435	0.883745	0.829268
	8.5	7.5	32.4467	4.32623		8.5	7.5	39.5184	5.26913		8.5	6.5	34.5266	5.31179		4.32623			5.26913			5.31179				------------------------------------------------------------								6.93878	0.937726	0.871406	0.813939
	9	7.5	38.6865	5.1582		9	5.5	29.1188	5.29434		9	7.5	39.5184	5.26913		5.1582			5.29434			5.26913				t = 1.19536								7.34694	0.93181	0.858731	0.798574
	9.5	7.5	37.8545	5.04727		9.5	6.5	35.3586	5.43978		9.5	7.5	39.1025	5.21366		5.04727			5.43978			5.21366				p = 0.2365								7.7551	0.925817	0.845824	0.783383
	10	6.5	32.4467	4.9918		10	7.5	37.4385	4.9918		10	7.5	42.0143	5.60191		4.9918			4.9918			5.60191				At the 0.05 level,								8.16327	0.919765	0.832745	0.768451
	10.5	6.5	33.2787	5.1198		10.5	7.5	36.6066	4.88087		10.5	7.5	36.1906	4.82541		5.1198			4.88087			4.82541				the two means are NOT significantly different.								8.57143	0.913678	0.819548	0.753895
	11	6.5	33.2787	5.1198		11	7.5	38.2705	5.10273		11	6.5	34.1106	5.24779		5.1198			5.10273			5.24779												8.97959	0.907607	0.80632	0.739834
	11.5	6.5	33.6947	5.1838		11.5	6.5	33.2787	5.1198		11.5	8.5	47.4221	5.57907		5.1838			5.1198			5.57907												9.38776	0.901543	0.793073	0.72627
	12	7.5	39.1025	5.21366		12	6.5	33.2787	5.1198		12	7.5	39.9344	5.32459		5.21366			5.1198			5.32459				Independent t-Test on Data1 col(MAD2) and col(MAD3):								9.79592	0.895537	0.779888	0.713299
	12.5	6.5	33.2787	5.1198		12.5	6.5	34.1107	5.24779		12.5	7.5	39.1025	5.21366		5.1198			5.24779			5.21366				Data	Mean	Variance	N					10.2041	0.88958	0.76677	0.700855
	13	6.5	34.1107	5.24779		13	6.5	35.3484	5.43822		13	7.5	40.3606	5.38141		5.24779			5.43822			5.38141				------------------------------------------------------------								10.6122	0.883702	0.753764	0.688963
	13.5	6.5	33.2787	5.1198		13.5	6.5	35.3586	5.43978		13.5	8.5	43.6783	5.13862		5.1198			5.43978			5.13862				MAD2	5.15913	0.0487	32					11.0204	0.877914	0.740902	0.677559
	14	5.5	27.8709	5.06744		14	7.5	38.6865	5.1582		14	7.5	37.8545	5.04727		5.06744			5.1582			5.04727				MAD3	5.24016	0.07719	32					11.4286	0.872216	0.728195	0.666594
	14.5	6.5	33.6947	5.1838		14.5	7.5	39.1025	5.21366		14.5	6.5	32.4467	4.9918		5.1838			5.21366			4.9918				------------------------------------------------------------								11.8367	0.866644	0.7157	0.656048
	15	6.5	34.1107	5.24779		15	7.5	37.8545	5.04727		15	7.5	34.5266	4.60355		5.24779			5.04727			4.60355				t = 1.29188								12.2449	0.861185	0.703416	0.645829
	15.5	7.5	37.4385	4.9918		15.5	6.5	34.1107	5.24779		15.5	6.5	34.9426	5.37579		4.9918			5.24779			5.37579				p = 0.20119								12.6531	0.855877	0.691401	0.635952
																										At the 0.05 level,								13.0612	0.850715	0.679664	0.626334
																										the two means are NOT significantly different.								13.4694	0.845715	0.668232	0.616976
																																		13.8775	0.840892	0.657132	0.607831
																																		14.2857	0.836236	0.646351	0.598853
																																		14.6939	0.831768	0.635915	0.590025
																																		15.102	0.827466	0.625793	0.581252
																																		15.5102	0.823344	0.61599	0.572522
																																		15.9184	0.819387	0.606484	0.563735
																																		16.3265	0.815589	0.597252	0.554859
																																		16.7347	0.811953	0.588292	0.54584
																																		17.1429	0.808458	0.57957	0.536628
																																		17.551	0.805118	0.571096	0.527234
																																		17.9592	0.801912	0.562841	0.51762
																																		18.3673	0.798847	0.554806	0.507839
																																		18.7755	0.795915	0.546981	0.49789
																																		19.1837	0.793105	0.539345	0.487824
																																		19.5918	0.790421	0.531899	0.477681
																																		20	0.787839	0.524609	0.46748
																																		20.4082	0.785365	0.517473	0.457282
																																		20.8163	0.782975	0.510463	0.447077
																																		21.2245	0.780663	0.503562	0.436916
																																		21.6327	0.778421	0.496765	0.426791
																																		22.0408	0.776229	0.490047	0.416722
																																		22.449	0.774092	0.48342	0.406733
																																		22.8571	0.771986	0.476867	0.396819
																																		23.2653	0.769917	0.470398	0.387031
																																		23.6735	0.767869	0.464014	0.377362
																																		24.0816	0.765836	0.457713	0.36786
																																		24.4898	0.763815	0.451505	0.35853
																																		24.898	0.761786	0.445376	0.349386
																																		25.3061	0.759751	0.439335	0.340443
																																		25.7143	0.757687	0.433369	0.331671
																																		26.1225	0.755589	0.427476	0.323076
																																		26.5306	0.753443	0.421657	0.314606
																																		26.9388	0.751234	0.415901	0.306245
																																		27.3469	0.748959	0.410221	0.297951
																																		27.7551	0.746597	0.404609	0.28969
																																		28.1633	0.744152	0.399081	0.281455
																																		28.5714	0.741605	0.393637	0.273214
																																		28.9796	0.738955	0.388281	0.264993
																																		29.3878	0.736193	0.383022	0.256783
																																		29.7959	0.733307	0.377851	0.248619
																																		30.2041	0.730296	0.372777	0.240529
																																		30.6122	0.727142	0.367786	0.232534
																																		31.0204	0.723845	0.362879	0.224688
																																		31.4286	0.720391	0.358052	0.217007
																																		31.8367	0.716774	0.353297	0.209551
																																		32.2449	0.712991	0.348622	0.202361
																																		32.6531	0.709032	0.344019	0.195497
																																		33.0612	0.704902	0.339499	0.189048
																																		33.4694	0.700593	0.335061	0.183084
																																		33.8775	0.696111	0.330709	0.177726
																																		34.2857	0.691456	0.326449	0.173063
																																		34.6939	0.686627	0.322273	0.169198
																																		35.102	0.681635	0.318188	0.166212
																																		35.5102	0.676474	0.314182	0.16414
																																		35.9184	0.671156	0.310255	0.163011
																																		36.3265	0.66568	0.306402	0.162784
																																		36.7347	0.660055	0.302613	0.163412
																																		37.1429	0.654288	0.298895	0.164813
																																		37.551	0.648385	0.295234	0.166886
																																		37.9592	0.642364	0.291641	0.169547
																																		38.3674	0.636228	0.288106	0.172679
																																		38.7755	0.63	0.284634	0.176201
																																		39.1837	0.623688	0.281222	0.180013
																																		39.5918	0.617309	0.27786	0.184025
																																		40	0.610881	0.27455	0.18816
																																		40.4082	0.604413	0.271272	0.192319
																																		40.8163	0.597927	0.268025	0.196446
																																		41.2245	0.59143	0.264791	0.200461
																																		41.6327	0.584943	0.261559	0.204323
																																		42.0408	0.578475	0.258321	0.207998
																																		42.449	0.572041	0.255061	0.211462
																																		42.8571	0.565658	0.251777	0.214732
																																		43.2653	0.559335	0.248453	0.21781
																																		43.6735	0.553093	0.245089	0.220739
																																		44.0816	0.546938	0.241674	0.223551
																																		44.4898	0.540888	0.238196	0.226291
																																		44.898	0.534951	0.234654	0.229013
																																		45.3061	0.529135	0.231026	0.23175
																																		45.7143	0.523452	0.227311	0.234564
																																		46.1225	0.517901	0.223491	0.237482
																																		46.5306	0.512491	0.219558	0.240556
																																		46.9388	0.507219	0.215504	0.24382
																																		47.3469	0.502088	0.211319	0.247307
																																		47.7551	0.497098	0.207008	0.251057
																																		48.1633	0.492244	0.202562	0.255086
																																		48.5714	0.48753	0.19799	0.259429
																																		48.9796	0.482947	0.193292	0.264084
																																		49.3878	0.478495	0.188473	0.269061
																																		49.7959	0.474166	0.183544	0.274348
																																		50.2041	0.469953	0.178504	0.279919
																																		50.6123	0.465853	0.173367	0.285747
																																		51.0204	0.461851	0.168137	0.291774
																																		51.4286	0.457944	0.162828	0.297961
																																		51.8367	0.454114	0.157455	0.304236
																																		52.2449	0.450357	0.152034	0.310544
																																		52.6531	0.44666	0.146596	0.316823
																																		53.0612	0.443012	0.141162	0.323011
																																		53.4694	0.439408	0.135774	0.329064
																																		53.8775	0.435834	0.130466	0.334923
																																		54.2857	0.432289	0.125281	0.340557
																																		54.6939	0.428761	0.120269	0.34592
																																		55.102	0.425247	0.11547	0.350982
																																		55.5102	0.42174	0.110943	0.355712
																																		55.9184	0.418232	0.106735	0.360072
																																		56.3265	0.414722	0.102905	0.364044
																																		56.7347	0.4112	0.0995103	0.367592
																																		57.1429	0.407665	0.096604	0.370703
																																		57.551	0.40411	0.0942455	0.373358
																																		57.9592	0.400534	0.0924739	0.37555
																																		58.3674	0.396936	0.0913255	0.377285
																																		58.7755	0.393311	0.090814	0.378565
																																		59.1837	0.389666	0.0909304	0.37942
																																		59.5918	0.385995	0.0916533	0.379863
																																		60	0.382303	0.0929318	0.379932
																																		60.4082	0.378591	0.0947124	0.379654
																																		60.8163	0.374859	0.0969267	0.379056
																																		61.2245	0.371111	0.0995048	0.378175
																																		61.6327	0.367344	0.102384	0.377028
																																		62.0408	0.363563	0.105494	0.37565
																																		62.449	0.359764	0.108783	0.374055
																																		62.8571	0.355951	0.112195	0.372272
																																		63.2653	0.352124	0.115682	0.370325
																																		63.6735	0.348284	0.119202	0.368232
																																		64.0816	0.344436	0.122711	0.366028
																																		64.4898	0.340577	0.126179	0.363725
																																		64.898	0.336714	0.12957	0.361357
																																		65.3061	0.332845	0.13286	0.358932
																																		65.7143	0.328974	0.136028	0.356467
																																		66.1225	0.325102	0.139057	0.353969
																																		66.5306	0.321226	0.14194	0.351429
																																		66.9388	0.317351	0.144665	0.348849
																																		67.3469	0.313471	0.147235	0.346202
																																		67.7551	0.309591	0.149647	0.343481
																																		68.1633	0.305707	0.151903	0.340656
																																		68.5714	0.301821	0.154008	0.337711
																																		68.9796	0.297935	0.155963	0.334627
																																		69.3878	0.294046	0.157776	0.331381
																																		69.7959	0.290162	0.159448	0.32797
																																		70.2041	0.28628	0.160991	0.324373
																																		70.6122	0.282406	0.162411	0.320589
																																		71.0204	0.27854	0.163718	0.316606
																																		71.4286	0.274684	0.164928	0.312419
																																		71.8367	0.270842	0.166051	0.308025
																																		72.2449	0.267012	0.167106	0.30341
																																		72.6531	0.263202	0.168105	0.298582
																																		73.0612	0.259411	0.169065	0.293528
																																		73.4694	0.255644	0.169998	0.288263
																																		73.8776	0.251906	0.170914	0.282792
																																		74.2857	0.248201	0.171826	0.277133
																																		74.6939	0.244538	0.172735	0.271316
																																		75.102	0.240919	0.173653	0.265366
																																		75.5102	0.237354	0.17458	0.259331
																																		75.9184	0.233847	0.175521	0.253243
																																		76.3265	0.230405	0.176481	0.247155
																																		76.7347	0.227036	0.177458	0.241109
																																		77.1429	0.22374	0.178458	0.235147
																																		77.551	0.220529	0.179479	0.229318
																																		77.9592	0.217402	0.180522	0.223654
																																		78.3674	0.214366	0.181583	0.218201
																																		78.7755	0.211426	0.182657	0.212985
																																		79.1837	0.208583	0.18374	0.208046
																																		79.5918	0.205844	0.184818	0.20341
																																		80	0.203209	0.185885	0.1991
																																		80.4082	0.200685	0.186927	0.195141
																																		80.8163	0.198267	0.187934	0.191538
																																		81.2245	0.19596	0.188896	0.188305
																																		81.6326	0.19376	0.1898	0.18543
																																		82.0408	0.191664	0.190643	0.182903
																																		82.449	0.18967	0.191411	0.180697
																																		82.8572	0.187769	0.192104	0.178774
																																		83.2653	0.185959	0.19271	0.177098
																																		83.6735	0.184229	0.193226	0.175609
																																		84.0816	0.182573	0.193644	0.174264
																																		84.4898	0.180983	0.193954	0.173
																																		84.898	0.17945	0.194152	0.171768
																																		85.3061	0.177967	0.194227	0.170518
																																		85.7143	0.176522	0.194175	0.169204
																																		86.1225	0.175109	0.193988	0.167794
																																		86.5306	0.173716	0.193664	0.166248
																																		86.9388	0.172335	0.193204	0.164551
																																		87.3469	0.170955	0.192603	0.162674
																																		87.7551	0.169564	0.191868	0.160607
																																		88.1633	0.168156	0.190998	0.158334
																																		88.5714	0.166718	0.189999	0.155843
																																		88.9796	0.165245	0.188873	0.153134
																																		89.3878	0.163727	0.187619	0.150193
																																		89.7959	0.162159	0.186245	0.147033
																																		90.2041	0.160537	0.184746	0.143653
																																		90.6123	0.158853	0.183128	0.140071
																																		91.0204	0.157109	0.181392	0.136309
																																		91.4286	0.155297	0.179544	0.13239
																																		91.8367	0.15342	0.17759	0.128355
																																		92.2449	0.151473	0.175535	0.124231
																																		92.6531	0.149456	0.173393	0.120068
																																		93.0612	0.147371	0.171169	0.115897
																																		93.4694	0.145213	0.168878	0.111762
																																		93.8776	0.142989	0.166525	0.107698
																																		94.2857	0.140698	0.16412	0.103734
																																		94.6939	0.138345	0.161673	0.0999113
																																		95.102	0.135933	0.159187	0.096247
																																		95.5102	0.133467	0.156673	0.0927769
																																		95.9184	0.130956	0.154134	0.0895162
																																		96.3265	0.1284	0.151581	0.0864894
																																		96.7347	0.125812	0.149022	0.0837113
																																		97.1429	0.123194	0.146466	0.0811886
																																		97.551	0.120553	0.143929	0.0789323
																																		97.9592	0.117896	0.141417	0.07693
																																		98.3674	0.115226	0.138948	0.0751806
																																		98.7755	0.112553	0.136528	0.0736574
																																		99.1837	0.109878	0.134169	0.0723413
																																		99.5918	0.107212	0.131879	0.0712
																																		100	0.104558	0.129664	0.0701975
																																		100.408	0.101923	0.12753	0.0693046
																																		100.816	0.0993158	0.125479	0.0684784
																																		101.225	0.0967381	0.123518	0.067698
																																		101.633	0.0942001	0.121647	0.0669285
																																		102.041	0.0917022	0.119872	0.0661587
																																		102.449	0.0892514	0.118197	0.0653745
																																		102.857	0.0868497	0.116622	0.0645735
																																		103.265	0.0844979	0.115155	0.0637666
																																		103.674	0.0822014	0.113793	0.0629589
																																		104.082	0.0799563	0.112539	0.0621795
																																		104.49	0.0777689	0.111388	0.0614414
																																		104.898	0.0756356	0.110336	0.0607786
																																		105.306	0.0735596	0.109378	0.060213
																																		105.714	0.0715415	0.1085	0.0597717
																																		106.123	0.0695794	0.107697	0.0594833
																																		106.531	0.0676778	0.106956	0.0593629
																																		106.939	0.0658312	0.106269	0.0594389
																																		107.347	0.064044	0.105625	0.0597149
																																		107.755	0.0623114	0.105015	0.0602094
																																		108.163	0.0606332	0.104436	0.0609184
																																		108.571	0.0590087	0.103875	0.0618421
																																		108.98	0.0574325	0.103331	0.0629733
																																		109.388	0.0559079	0.102792	0.0642919
																																		109.796	0.0544275	0.102254	0.0657881
																																		110.204	0.0529956	0.101705	0.0674268
																																		110.612	0.051608	0.101136	0.0691911
																																		111.02	0.0502655	0.100539	0.0710404
																																		111.429	0.0489703	0.0999005	0.0729441
																																		111.837	0.0477183	0.0992162	0.0748653
																																		112.245	0.0465158	0.0984748	0.0767603
																																		112.653	0.0453566	0.0976744	0.0786013
																																		113.061	0.0442457	0.0968118	0.0803421
																																		113.469	0.0431793	0.0958838	0.0819648
																																		113.878	0.0421567	0.0948953	0.0834366
																																		114.286	0.041179	0.0938414	0.0847454
																																		114.694	0.0402395	0.0927284	0.0858818
																																		115.102	0.0393433	0.0915516	0.0868336
																																		115.51	0.0384819	0.0903117	0.0876097
																																		115.918	0.0376593	0.0890071	0.0881963
																																		116.326	0.0368709	0.0876316	0.0886039
																																		116.735	0.0361149	0.0861882	0.0888208
																																		117.143	0.0353929	0.084669	0.088845
																																		117.551	0.0346965	0.0830803	0.0886739
																																		117.959	0.0340304	0.0814204	0.0882932
																																		118.367	0.0333838	0.0796951	0.0877139
																																		118.775	0.032758	0.0779124	0.0869242
																																		119.184	0.0321459	0.0760742	0.0859452
																																		119.592	0.0315411	0.0741942	0.0847844
																																		120	0.0309435	0.0722705	0.083463
																																		120.408	0.0303404	0.0703131	0.0820112
																																		120.816	0.0297363	0.0683207	0.0804416
																																		121.225	0.0291193	0.0662934	0.0787932
																																		121.633	0.028492	0.0642348	0.0770693
																																		122.041	0.0278507	0.0621374	0.0752965
																																		122.449	0.0271905	0.0600108	0.073478
																																		122.857	0.0265176	0.0578494	0.0716165
																																		123.265	0.0258207	0.055664	0.069725
																																		123.674	0.0251092	0.0534599	0.0677903
																																		124.082	0.024373	0.0512431	0.0658368
																																		124.49	0.023615	0.0490297	0.0638556
																																		124.898	0.0228346	0.0468179	0.0618721
																																		125.306	0.0220238	0.0446252	0.0598981
																																		125.714	0.0211931	0.0424463	0.057945
																																		126.123	0.0203295	0.0402878	0.0560432
																																		126.531	0.0194469	0.0381489	0.0541834
																																		126.939	0.0185395	0.0360217	0.0523939
																																		127.347	0.0176131	0.0339157	0.0506517
																																		127.755	0.0166776	0.0318169	0.048959
																																		128.163	0.0157253	0.0297419	0.0472973
																																		128.571	0.0147775	0.0276859	0.0456352
																																		128.98	0.0138204	0.0256619	0.043973
																																		129.388	0.0128704	0.0236843	0.0422645
																																		129.796	0.0119233	0.0217521	0.0405278
																																		130.204	0.0109757	0.0198932	0.0387348
																																		130.612	0.0100428	0.018093	0.0369036
																																		131.02	0.00910281	0.0163735	0.0350485
																																		131.429	0.00818347	0.0147208	0.0331661
																																		131.837	0.00726522	0.0131306	0.0313057
																																		132.245	0.00636612	0.0116093	0.0294366
																																		132.653	0.00549562	0.0101231	0.0276025
																																		133.061	0.00464158	0.00870568	0.0257653
																																		133.469	0.00385129	0.00731556	0.0239181
[truncated: 8 more columns]
