# Supplementary material for: Deciphering the actin structure-dependent preferential cooperative binding of cofilin
Source: eLife. 2024 Aug 2;13:RP95257. doi: 10.7554/eLife.95257 (PMC11296705; doi:10.7554/eLife.95257)
Supplement: Figure 5—figure supplement 1—source data 1. — These data are presented as origin plots in Figure 5—figure supplement 1A–C. [file elife-95257-fig5-figsupp1-data1.xlsx]

## Sheet: Figure 5-figure supplement 1
Figure 5-figure supplement 1A	Length(nm)	Height(nm)		Figure 5-figure supplement 1B	Length(nm)	Height(nm)		Figure 5-figure supplement 1C	Length(nm)	Height(nm)
	0	0.903			0	0			0	0.230469
	0.994706	1.18113			0.994706	0.110207			0.994706	0.224458
	1.98941	1.66935			1.98941	0.315538			1.98941	0.0852279
	2.98412	1.97208			2.98412	0.599954			2.98412	0
	3.97883	1.91774			3.97883	0.864459			3.97883	0.0918286
	4.97353	1.73102			4.97353	1.01446			4.97353	0.3212
	5.96824	1.7394			5.96824	1.08475			5.96824	0.512057
	6.96294	1.97302			6.96294	1.25993			6.96294	0.512028
	7.95765	2.16819			7.95765	1.67148			7.95765	0.352475
	8.95236	2.09592			8.95236	2.21152			8.95236	0.240497
	9.94706	1.8111			9.94706	2.60646			9.94706	0.341347
	10.9418	1.58193			10.9418	2.67504			10.9418	0.586996
	11.9365	1.50884			11.9365	2.53086			11.9365	0.767196
	12.9312	1.48416			12.9312	2.47932			12.9312	0.796891
	13.9259	1.39211			13.9259	2.70326			13.9259	0.801796
	14.9206	1.26636			14.9206	3.08303			14.9206	0.94435
	15.9153	1.2267			15.9153	3.35838			15.9153	1.22145
	16.91	1.30114			16.91	3.39699			16.91	1.4688
	17.9047	1.36603			17.9047	3.25793			17.9047	1.541
	18.8994	1.27973			18.8994	3.09179			18.8994	1.46015
	19.8941	1.04543			19.8941	2.97208			19.8941	1.35588
	20.8888	0.831728			20.8888	2.87771			20.8888	1.29754
	21.8835	0.782087			21.8835	2.76836			21.8835	1.25237
	22.8782	0.844541			22.8782	2.649			22.8782	1.20917
	23.8729	0.864732			23.8729	2.54157			23.8729	1.22251
	24.8677	0.772377			24.8677	2.41493			24.8677	1.29412
	25.8624	0.652378			25.8624	2.204			25.8624	1.30611
	26.8571	0.6389			26.8571	1.89338			26.8571	1.14
	27.8518	0.770105			27.8518	1.55228			27.8518	0.838273
	28.8465	0.953088			28.8465	1.28442			28.8465	0.595111
	29.8412	1.09029			29.8412	1.15928			29.8412	0.570709
	30.8359	1.16057			30.8359	1.16128			30.8359	0.755231
	31.8306	1.21623			31.8306	1.20688			31.8306	0.991557
	32.8253	1.30755			32.8253	1.20843			32.8253	1.14218
	33.82	1.42334			33.82	1.17461			33.82	1.19197
	34.8147	1.52357			34.8147	1.20628			34.8147	1.20999
	35.8094	1.59697			35.8094	1.39138			35.8094	1.26355
	36.8041	1.64684			36.8041	1.70484			36.8041	1.37053
	37.7988	1.63092			37.7988	2.02845			37.7988	1.53775
	38.7935	1.52977			38.7935	2.25069			38.7935	1.77551
	39.7882	1.44163			39.7882	2.37119			39.7882	2.06629
	40.7829	1.46465			40.7829	2.49471			40.7829	2.33669
	41.7777	1.60246			41.7777	2.72637			41.7777	2.53359
	42.7724	1.77541			42.7724	3.07043			42.7724	2.6862
	43.7671	1.88186			43.7671	3.39555			43.7671	2.85821
	44.7618	1.85224			44.7618	3.56643			44.7618	3.04748
	45.7565	1.70108			45.7565	3.5365			45.7565	3.16661
	46.7512	1.53644			46.7512	3.38589			46.7512	3.14258
	47.7459	1.48699			47.7459	3.25091			47.7459	3.01137
	48.7406	1.59877			48.7406	3.22073			48.7406	2.90628
	49.7353	1.76869			49.7353	3.26571			49.7353	2.90727
	50.73	1.80889			50.73	3.27339			50.73	2.95013
	51.7247	1.61135			51.7247	3.16			51.7247	2.91138
	52.7194	1.27078			52.7194	2.93123			52.7194	2.72622
	53.7141	1.00961			53.7141	2.65702			53.7141	2.45051
	54.7088	0.957623			54.7088	2.40275			54.7088	2.19417
	55.7035	1.0189			55.7035	2.20618			55.7035	2.01571
	56.6983	0.972114			56.6983	2.07396			56.6983	1.90238
	57.693	0.692089			57.693	1.99588			57.693	1.82137
	58.6877	0.316337			58.6877	1.94019			58.6877	1.78658
	59.6824	0.111288			59.6824	1.86448			59.6824	1.83817
	60.6771	0.219523			60.6771	1.74195			60.6771	1.95632
	61.6718	0.498501			61.6718	1.60112			61.6718	2.06189
	62.6665	0.650803			62.6665	1.52811			62.6665	2.09464
	63.6612	0.511758			63.6612	1.60122			63.6612	2.07141
	64.6559	0.195302			64.6559	1.80693			64.6559	2.0598
	65.6506	0			65.6506	2.04741			65.6506	2.10313
	66.6453	0.145276			66.6453	2.23293			66.6453	2.21231
	67.64	0.560863			67.64	2.34935			67.64	2.38957
	68.6347	0.946524			68.6347	2.4536			68.6347	2.62499
	69.6294	1.04261			69.6294	2.60007			69.6294	2.8736
	70.6241	0.862452			70.6241	2.80541			70.6241	3.06744
	71.6188	0.660674			71.6188	3.03715			71.6188	3.17157
	72.6136	0.679321			72.6136	3.25609			72.6136	3.21568
	73.6082	0.918383			73.6082	3.43737			73.6082	3.27695
	74.603	1.16137			74.603	3.56129			74.603	3.41574
	75.5977	1.22825			75.5977	3.5936			75.5977	3.60196
	76.5924	1.17239			76.5924	3.50185			76.5924	3.71947
	77.5871	1.21369			77.5871	3.2957			77.5871	3.67405
	78.5818	1.46454			78.5818	3.03746			78.5818	3.48726
	79.5765	1.77248			79.5765	2.80242			79.5765	3.2667
	80.5712	1.87552			80.5712	2.63617			80.5712	3.08669
	81.5659	1.70193			81.5659	2.53645			81.5659	2.91607
	82.5606	1.45885			82.5606	2.44918			82.5606	2.66254
	83.5553	1.41133			83.5553	2.31626			83.5553	2.28269
	84.55	1.60232			84.55	2.10173			84.55	1.86936
	85.5447	1.82596			85.5447	1.82989			85.5447	1.60424
	86.5394	1.85354			86.5394	1.56736			86.5394	1.58788
	87.5341	1.66672			87.5341	1.37687			87.5341	1.7474
	88.5289	1.43822			88.5289	1.2808			88.5289	1.9042
	89.5236	1.34272			89.5236	1.25326			89.5236	1.8978
	90.3365	1.36948			90.1121	1.24906			90.3411	1.77555
