# Supplementary material for: Deciphering the actin structure-dependent preferential cooperative binding of cofilin
Source: eLife. 2024 Aug 2;13:RP95257. doi: 10.7554/eLife.95257 (PMC11296705; doi:10.7554/eLife.95257)
Supplement: Figure 5—figure supplement 2—source data 1. — These data are presented as origin plots in Figure 5—figure supplement 2B–E. [file elife-95257-fig5-figsupp2-data1.xlsx]

## Sheet: Figure 5-figure supplement 2
Figure 5-figure supplement 2B					Figure 5-figure supplement 2C								Figure 5-figure supplement 2D						Figure 5-figure supplement 2E
Time (s)	Protomer Pairs(5)	HHP5(nm)	MAD5(nm)		Mean MAD5 (nm)	SD5 (nm)	Mean MAD6 (nm)	SD6 (nm)	Mean MAD7(nm)	SD7 (nm)	N		Protomer Pairs	HHP by AFM (nm)	SD (nm)	N	Calculated HHP (nm)		MAD(5.5Pairs/HHP,nm)	MAD(4.5Pairs/HHP,nm)	MAD(3.5Pairs/HHP,nm)
0	4.5	27.6151	6.1367		5.70244	0.497829	5.87395	0.290127	6.05168	0.288237	13		3.5	22.2118	0.24105	2	19.25		5.02175	6.1367	6.27736
0.5	4.5	28.1308	6.25129										4.5	26.0531	1.36066	21	24.75		5.01838	6.25129	6.4151
1	5.5	27.6196	5.02175										5.5	28.5327	0.927	11	30.25		5.17117	6.00699
1.5	4.5	27.0315	6.00699																5.4405	5.3412
2	3.5	21.9708	6.27736		Statistical test:														5.06343	5.80177
2.5	4.5	24.0354	5.3412		Independent t-Test on Data1 col(MAD5) and col(MAD6):														5.1173	5.27507
3	4.5	26.108	5.80177		Data	Mean	Variance	N											5.38663	5.68212
3.5	4.5	23.7378	5.27507		------------------------------------------------------------														5.33276	5.91067
4	4.5	25.5696	5.68212		MAD5	5.70244	0.26849	13											4.90183	4.99336
4.5	4.5	26.598	5.91067		MAD6	5.87395	0.09119	13											5.33276	5.66195
5	4.5	22.4701	4.99336		------------------------------------------------------------														5.2789	5.46444
5.5	5.5	27.6011	5.01838		t = 1.03109															5.99113
6	3.5	22.4529	6.4151		p = 0.31278															5.72778
					At the 0.05 level,															6.05697
Time (s)	Protomer Pairs(6)	HHP6(nm)	MAD6(nm)		the two means are NOT significantly different.															5.92529
0	5.5	32.2293	5.85988																	5.85946
0.5	5.5	31.7341	5.76984		Independent t-Test on Data1 col(MAD5) and col(MAD7):															5.92529
1	5.5	32.2293	5.85988		Data	Mean	Variance	N												5.66195
1.5	4.5	27.6852	6.15228		------------------------------------------------------------															5.85946
2	4.5	29.1331	6.47401		MAD5	5.70244	0.26849	13												5.99113
2.5	5.5	33.1981	6.03603		MAD7	6.05168	0.09	13												6.05697
3	5.5	29.6984	5.3997		------------------------------------------------------------
3.5	5.5	30.4039	5.52799		t = 2.10306
4	5.5	30.1547	5.48268		p = 0.04613
4.5	5.5	33.2497	6.04541		At the 0.05 level,
5	5.5	31.2346	5.67903		the two means are significantly different.
5.5	4.5	27.0811	6.01802
6	5.5	33.3114	6.05662		Independent t-Test on Data1 col(MAD6) and col(MAD7):
					Data	Mean	Variance	N
Time (s)	Protomer Pairs(7)	HHP7(nm)	MAD7(nm)		------------------------------------------------------------
0	4.5	28.695	6.37668		MAD6	5.87395	0.09119	13
0.5	4.5	26.5881	5.90846		MAD7	6.05168	0.09	13
1	4.5	25.0766	5.57258		------------------------------------------------------------
1.5	4.5	29.1192	6.47094		t = 1.50544
2	4.5	28.6249	6.36109		p = 0.14526
2.5	4.5	25.5761	5.68358		At the 0.05 level,
3	4.5	27.0638	6.01419		the two means are NOT significantly different.
3.5	4.5	28.4102	6.31338
4	4.5	28.6594	6.36876
4.5	4.5	26.0843	5.7965
5	4.5	27.0811	6.01802
5.5	5.5	31.7331	5.76965
6	4.5	27.0811	6.01802
