# Supplementary material for: Deciphering the actin structure-dependent preferential cooperative binding of cofilin
Source: eLife. 2024 Aug 2;13:RP95257. doi: 10.7554/eLife.95257 (PMC11296705; doi:10.7554/eLife.95257)
Supplement: Figure 5—source data 1. — These data are presented as origin plots in Figure 5A–C. [file elife-95257-fig5-data1.xlsx]

## Sheet: Figure 5
Figure 5A	Length(nm)	Height(nm)		Figure 5B	Length(nm)	Height(nm)		Figure 5C	Length(nm)	Height(nm)
	0	0.00294995			0	0			0	0.0830927
	0.592529	0			0.592529	0.535293			0.296265	0.153377
	1.18506	0.0543292			1.18506	0.964618			0.592529	0.236462
	1.77759	0.166815			1.77759	1.31107			0.888794	0.304145
	2.37012	0.304301			2.37012	1.61863			1.18506	0.344955
	2.96265	0.415648			2.96265	1.90861			1.48132	0.35835
	3.55518	0.461591			3.55518	2.18057			1.77759	0.342872
	4.14771	0.449115			4.14771	2.40738			2.07385	0.305474
	4.74023	0.433107			4.74023	2.57761			2.37012	0.255358
	5.33276	0.484935			5.33276	2.69526			2.66638	0.199867
	5.92529	0.641246			5.92529	2.77942			2.96265	0.147076
	6.51782	0.870278			6.51782	2.84578			3.25891	0.105592
	7.11035	1.07719			7.11035	2.89283			3.55518	0.0846729
	7.70288	1.17519			7.70288	2.92268			3.85144	0.0914755
	8.29541	1.16834			8.29541	2.92971			4.14771	0.130693
	8.88794	1.11653			8.88794	2.90267			4.44397	0.198324
	9.48047	1.10842			9.48047	2.83101			4.74023	0.295989
	10.073	1.20295			10.073	2.70389			5.0365	0.428424
	10.6655	1.39578			10.6655	2.52802			5.33276	0.587743
	11.2581	1.62239			11.2581	2.33193			5.62903	0.758898
	11.8506	1.81795			11.8506	2.14257			5.92529	0.910408
	12.4431	1.96464			12.4431	1.96561			6.22156	1.01626
	13.0356	2.02916			13.0356	1.78794			6.51782	1.073
	13.6282	2.01718			13.6282	1.57777			6.81409	1.08449
	14.2207	1.9675			14.2207	1.32969			7.11035	1.06158
	14.8132	1.91454			14.8132	1.07584			7.40662	1.01417
	15.4058	1.87742			15.4058	0.858715			7.70288	0.942805
	15.9983	1.87671			15.9983	0.709487			7.99915	0.857718
	16.5908	1.91799			16.5908	0.621022			8.29541	0.782105
	17.1834	1.98545			17.1834	0.559265			8.59168	0.743654
	17.7759	2.03736			17.7759	0.480172			8.88794	0.754374
	18.3684	2.01818			18.3684	0.374806			9.1842	0.8159
	18.9609	1.8904			18.9609	0.268716			9.48047	0.912565
	19.5535	1.694			19.5535	0.190041			9.77673	1.03323
	20.146	1.4763			20.146	0.152811			10.073	1.17821
	20.7385	1.28239			20.7385	0.137911			10.3693	1.34061
	21.3311	1.142			21.3311	0.125051			10.6655	1.50357
	21.9236	1.06041			21.9236	0.105778			10.9618	1.6391
	22.5161	1.01341			22.5161	0.0998562			11.2581	1.72816
	23.1086	0.977823			23.1086	0.127375			11.5543	1.77934
	23.7012	0.918646			23.7012	0.191914			11.8506	1.81269
	24.2937	0.819152			24.2937	0.278504			12.1469	1.83088
	24.8862	0.674693			24.8862	0.363629			12.4431	1.82435
	25.4788	0.534615			25.4788	0.434703			12.7394	1.7797
	26.0713	0.419571			26.0713	0.498364			13.0356	1.70413
	26.6638	0.356588			26.6638	0.581703			13.3319	1.61996
	27.2564	0.3484			27.2564	0.692344			13.6282	1.54729
	27.8489	0.381235			27.8489	0.82834			13.9244	1.49465
	28.4414	0.412659			28.4414	0.973173			14.2207	1.46803
	29.0339	0.400481			29.0339	1.09855			14.517	1.45711
	29.6265	0.351097			29.6265	1.20109			14.8132	1.44898
	30.219	0.262754			30.219	1.28533			15.1095	1.43798
	30.8115	0.19285			30.8115	1.36135			15.4058	1.42249
	31.4041	0.180465			31.4041	1.44379			15.702	1.41196
	31.9966	0.25297			31.9966	1.53067			15.9983	1.41846
	32.5891	0.350756			32.5891	1.61939			16.2946	1.43875
	33.1816	0.438658			33.1816	1.7139			16.5908	1.4561
	33.7742	0.488269			33.7742	1.8083			16.8871	1.4566
	34.3667	0.491641			34.3667	1.90028			17.1834	1.44058
	34.9592	0.471088			34.9592	1.98716			17.4796	1.41774
	35.5518	0.457717			35.5518	2.06199			17.7759	1.39739
	36.1443	0.497887			36.1443	2.11019			18.0721	1.37113
	36.7368	0.588627			36.7368	2.11757			18.3684	1.32648
	37.3293	0.716279			37.3293	2.07406			18.6647	1.26009
	37.9219	0.846241			37.9219	1.97856			18.9609	1.18036
	38.5144	0.947698			38.5144	1.84011			19.2572	1.10251
	39.1069	1.01418			39.1069	1.68674			19.5535	1.02816
	39.6995	1.0466			39.6995	1.55767			19.8497	0.953916
	40.292	1.08058			40.292	1.48833			20.146	0.87431
	40.8845	1.13259			40.8845	1.48954			20.4423	0.788628
	41.477	1.24105			41.477	1.52761			20.7385	0.710173
	42.0696	1.42277			42.0696	1.55699			21.0348	0.652761
	42.6621	1.65851			42.6621	1.52325			21.3311	0.624053
	43.2546	1.87617			43.2546	1.40069			21.6273	0.613082
	43.8472	2.00183			43.8472	1.20977			21.9236	0.600163
	44.4397	2.01982			44.4397	1.01079			22.2199	0.573982
	45.0322	1.9447			45.0322	0.859522			22.5161	0.535341
	45.6248	1.84191			45.6248	0.788721			22.8124	0.493537
	46.2173	1.79538			46.2173	0.791752			23.1086	0.458111
	46.8098	1.84744			46.8098	0.814653			23.4049	0.428598
	47.4023	1.99372			47.4023	0.809856			23.7012	0.398223
	47.9949	2.1779			47.9949	0.749498			23.9974	0.363482
	48.5874	2.31237			48.5874	0.639273			24.2937	0.321165
	49.1799	2.32186			49.1799	0.511257			24.59	0.275875
	49.7725	2.19419			49.7725	0.406211			24.8862	0.236092
	50.365	1.99434			50.365	0.348965			25.1825	0.211708
	50.9575	1.79179			50.9575	0.346712			25.4788	0.200731
	51.55	1.63363			51.55	0.375484			25.775	0.192092
	52.1426	1.53302			52.1426	0.410801			26.0713	0.178735
	52.7351	1.48239			52.7351	0.429367			26.3676	0.165407
	53.3276	1.46854			53.3276	0.422018			26.6638	0.162053
	53.9202	1.45038			53.9202	0.395284			26.9601	0.170381
	54.5127	1.41747			54.5127	0.364383			27.2564	0.178407
	55.1052	1.34573			55.1052	0.349128			27.5526	0.170675
	55.6977	1.24344			55.6977	0.3599			27.8489	0.144446
	56.2903	1.10339			56.2903	0.396373			28.1451	0.110506
	56.8828	0.945934			56.8828	0.433321			28.4414	0.0799656
	57.4753	0.802927			57.4753	0.447787			28.7377	0.0510206
	58.0679	0.704637			58.0679	0.431534			29.0339	0.0224743
	58.6604	0.676973			58.6604	0.403006			29.3302	0.000761032
	59.2529	0.699646			59.2529	0.390056			29.6265	0
	59.8455	0.738645			59.8455	0.427835			29.9227	0.0290527
	60.438	0.751336			60.438	0.530218			30.219	0.0825119
	61.0305	0.705927			61.0305	0.680538			30.5153	0.14659
	61.623	0.598085			61.623	0.839602			30.8115	0.209707
	62.2156	0.462036			62.2156	0.969736			31.1078	0.264178
	62.8081	0.357541			62.8081	1.04609			31.4041	0.3044
	63.4006	0.31694			63.4006	1.07793			31.7003	0.334271
	63.9932	0.348345			63.9932	1.09101			31.9966	0.357019
	64.5857	0.432866			64.5857	1.11914			32.2929	0.371599
	65.1782	0.525085			65.1782	1.18574			32.5891	0.378159
	65.7708	0.564198			65.7708	1.29714			32.8854	0.372292
	66.3633	0.498757			66.3633	1.44374			33.1816	0.352496
	66.9558	0.389404			66.9558	1.59935			33.4779	0.325158
	67.5483	0.280897			67.5483	1.73467			33.7742	0.297915
	68.1409	0.229629			68.1409	1.8275			34.0704	0.272832
	68.7334	0.267587			68.7334	1.87033			34.3667	0.25995
	69.3259	0.394897			69.3259	1.87283			34.663	0.266089
	69.9185	0.57238			69.9185	1.85246			34.9592	0.292349
	70.511	0.717785			70.511	1.83048			35.2555	0.343831
	71.1035	0.784243			71.1035	1.83969			35.5518	0.423466
	71.696	0.750014			71.696	1.88368			35.848	0.530313
	72.2886	0.662529			72.2886	1.94981			36.1443	0.656667
	72.8811	0.594025			72.8811	2.02077			36.4406	0.786589
	73.4736	0.5991			73.4736	2.07611			36.7368	0.902378
	74.0662	0.713943			74.0662	2.09764			37.0331	0.993168
	74.6587	0.894711			74.6587	2.07686			37.3293	1.05594
	75.2512	1.10479			75.2512	2.0094			37.6256	1.10325
	75.8438	1.26971			75.8438	1.90271			37.9219	1.14661
	76.4363	1.34822			76.4363	1.7756			38.2181	1.17936
	77.0288	1.29845			77.0288	1.65199			38.5144	1.18868
	77.6213	1.18201			77.6213	1.55819			38.8107	1.16791
	78.2139	1.06289			78.2139	1.50564			39.1069	1.12182
	78.8064	1.00695			78.8064	1.48949			39.4032	1.08098
	79.3989	1.05358			79.3989	1.49284			39.6995	1.07734
	79.9915	1.20624			79.9915	1.48618			39.9957	1.11909
	80.584	1.44027			80.584	1.44973			40.292	1.19839
	81.1765	1.69175			80.8089	1.42931			40.5883	1.30523
	81.769	1.88741							40.8845	1.43207
	82.3616	1.96883							41.1808	1.57634
	82.9541	1.9105							41.477	1.72961
	83.5466	1.76341							41.7733	1.87784
	84.1392	1.59081							42.0696	2.01005
	84.7317	1.49483							42.3658	2.12553
	85.3242	1.50099							42.6621	2.23017
	85.9167	1.57142							42.9584	2.32987
	86.5093	1.65522							43.2546	2.42712
	87.1018	1.68265							43.5509	2.51375
	87.6943	1.6105							43.8472	2.59173
	88.2869	1.41768							44.1434	2.66379
	88.8794	1.16359							44.4397	2.72737
	89.4719	0.932487							44.736	2.78323
	90.0644	0.773365							45.0322	2.82908
	90.657	0.702502							45.3285	2.86992
	91.2495	0.675845							45.6248	2.91394
	91.842	0.633093							45.921	2.96072
	92.4346	0.538854							46.2173	3.00345
	93.0271	0.373729							46.5136	3.0353
	93.1111	0.346917							46.8098	3.05882
									47.1061	3.0856
									47.4023	3.11938
									47.6986	3.15081
									47.9949	3.16903
									48.2911	3.17504
									48.5874	3.17648
									48.8837	3.18244
									49.1799	3.1952
									49.4762	3.21028
									49.7725	3.22411
									50.0687	3.2283
									50.365	3.21203
									50.6613	3.16592
									50.9575	3.08824
									51.2538	2.98966
									51.55	2.8821
									51.8463	2.77832
									52.1426	2.68747
									52.4388	2.60276
									52.7351	2.5132
									53.0314	2.41011
									53.3276	2.29769
									53.6239	2.19225
									53.9202	2.10536
									54.2164	2.04375
									54.5127	2.0011
									54.809	1.97222
									55.1052	1.95061
									55.4015	1.9335
									55.6977	1.92034
									55.994	1.90481
									56.2903	1.87396
									56.5866	1.81341
									56.8828	1.72166
									57.1791	1.6127
									57.4753	1.50427
									57.7716	1.40497
									58.0679	1.31354
									58.3641	1.2217
									58.6604	1.13567
									58.9567	1.06949
									59.2529	1.01802
									59.5492	0.96419
									59.8455	0.897668
									60.1417	0.816585
									60.438	0.727696
									60.7343	0.642138
									61.0305	0.575854
									61.3268	0.534477
									61.623	0.5147
									61.9193	0.509099
									62.2156	0.513531
									62.5118	0.525413
									62.8081	0.545821
									63.1044	0.579353
									63.4006	0.621622
									63.6969	0.664455
									63.9932	0.700083
									64.2894	0.726976
									64.5857	0.743862
									64.882	0.75092
									65.1782	0.748758
									65.4745	0.736099
									65.7708	0.715724
									66.067	0.693463
									66.3633	0.678563
									66.6595	0.677751
									66.9558	0.69781
									67.2521	0.744204
									67.5483	0.817135
									67.8446	0.907778
									68.1409	0.996514
									68.4371	1.07121
									68.7334	1.13247
									69.0297	1.18543
									69.3259	1.23547
									69.6222	1.27584
									69.9185	1.29981
									70.2147	1.30428
									70.511	1.28761
									70.8072	1.2572
									71.1035	1.218
									71.3998	1.17723
									71.696	1.14348
									71.9923	1.13255
									72.2886	1.1533
									72.5848	1.21095
									72.8811	1.30584
									73.1774	1.42644
									73.4736	1.55357
									73.7699	1.67461
									74.0662	1.78466
									74.3624	1.8818
									74.6587	1.96604
									74.955	2.03212
									75.2512	2.07592
									75.5475	2.09676
									75.8438	2.09403
									76.14	2.07102
									76.4363	2.03027
									76.7325	1.97848
									77.0288	1.91985
									77.3251	1.8573
									77.6213	1.79519
									77.9176	1.74006
									78.2139	1.70031
									78.5101	1.6856
									78.8064	1.69654
									79.1027	1.72664
									79.3989	1.76767
									79.6952	1.81695
									79.9915	1.87576
									80.2877	1.93528
									80.584	1.98095
									80.8803	2.00045
									81.1765	1.99278
									81.4728	1.96502
									81.769	1.92382
									82.0653	1.87837
									82.3616	1.82763
									82.6578	1.7642
									82.9541	1.68155
									83.2504	1.58112
									83.5466	1.47942
									83.8429	1.39195
									84.1392	1.3312
									84.4354	1.29916
									84.7317	1.2813
									85.028	1.26207
									85.3242	1.23572
									85.6205	1.20352
									85.9167	1.16688
									86.213	1.12644
									86.5093	1.08872
									86.8055	1.0588
									87.1018	1.03098
									87.3981	0.999508
									87.6943	0.963397
									87.9906	0.925919
									88.2869	0.888273
									88.5831	0.851328
									88.8794	0.817349
									89.1757	0.784533
									89.4719	0.749502
									89.7682	0.711388
									90.0644	0.669058
									90.3607	0.621212
									90.657	0.578081
									90.9532	0.542473
									91.2495	0.509956
									91.5458	0.476595
									91.8292	0.435844
