# Supplementary material for: Deciphering the actin structure-dependent preferential cooperative binding of cofilin
Source: eLife. 2024 Aug 2;13:RP95257. doi: 10.7554/eLife.95257 (PMC11296705; doi:10.7554/eLife.95257)
Supplement: Figure 6—figure supplement 1—source data 1. — These data are presented as origin plots in Figure 6—figure supplement 1A–C. [file elife-95257-fig6-figsupp1-data1.xlsx]

## Sheet: Figure 6-figure supplement 1
Figure 6-figure supplement 1A						Figure 6-figure supplement 1B					Figure 6-figure supplement 1C											Independent t-Test on Data1 col(MAD_PE) and col(MAD_BE):
Length_BE (nm)	Height_BE (nm)		Length_PE (nm)	Height_PE (nn)		Time (s)	MAD_PE (nm)	MAD_BE (nm)	MAD_normal (nm)		MAD_PE (nm)	MAD_BE (nm)	MAD_normal (nm)		MAD_PE (nm)	SD1 (nm)	MAD_BE (nm)	SD2 (nm)	MAD_normal (nm)	SD3 (nm)
0	1.01191		0	0.00609207		0	5.32581	5.10425	4.88675		4.41365	4.09484	4.28187		5.25172	0.297505	5.04564	0.349619	4.82481	0.300956		Data	Mean	Variance	N
0.391389	1.12016		0.391389	0.00479507		0.5	5.33557	4.87954	4.70611		4.51217	4.47035	4.39363									------------------------------------------------------------
0.782779	1.21603		0.782779	0		1	4.41365	5.06843	5.23007		4.62203	4.55216	4.45069		5.3 ± 0.3, N = 55		5.0 ± 0.3, N = 57		4.8 ± 0.3, N = 129			MAD_PE	5.25172	0.09015	55
1.17417	1.28066		1.17417	0.00158691		1.5	5.3685	4.81113	4.63094		4.68988	4.57875	4.45869									MAD_BE	5.04564	0.12442	57
1.56556	1.3424		1.56556	0.0214958		2	5.35043	5.25897	4.5395		4.82357	4.59741	4.46256									------------------------------------------------------------
1.95695	1.41024		1.95695	0.0797615		2.5	4.82357	4.90082	4.74713		4.83701	4.5984	4.46335									t = -3.32382
2.34834	1.43406		2.34834	0.160587		3	5.26696	4.88868	4.75463		4.9576	4.61018	4.48115									p = 0.00121
2.73973	1.39379		2.73973	0.254402		3.5	4.83701	5.00237	5.1186		4.9576	4.68017	4.48522
3.13111	1.31544		3.13111	0.336094		4	5.40639	4.70942	4.76123		4.97361	4.69537	4.49667									At the 0.05 level,
3.52251	1.26768		3.52251	0.402634		4.5	5.39502	4.95542	4.63422		4.99394	4.69667	4.49722									the two means are significantly different.
3.91389	1.25292		3.91389	0.485851		5	5.47945	5.59636	4.91267		5.02464	4.70942	4.50423
4.30528	1.24632		4.30528	0.587242		5.5	5.34097	4.47035	4.8171		5.04383	4.73898	4.51331									Independent t-Test on Data1 col(MAD_PE) and col(MAD_Normal):
4.69667	1.27073		4.69667	0.706497		6	5.82153	5.29881	4.39363		5.05184	4.74679	4.51669
5.08806	1.32621		5.08806	0.817566		6.5	5.6534	4.09484	5.05796		5.05566	4.75244	4.51814									Data	Mean	Variance	N
5.47945	1.36993		5.47945	0.893921		7	5.33168	5.29581	4.91016		5.11023	4.78875	4.52157									------------------------------------------------------------
5.87084	1.39146		5.87084	0.95602		7.5	5.20951	4.78875	4.63646		5.11062	4.79491	4.52321									MAD_PE	5.25172	0.09015	55
6.26223	1.40972		6.26223	1.01414		8	4.9576	4.89663	5.12724		5.11777	4.80834	4.53859									MAD_Normal	4.82481	0.09128	129
6.65362	1.45865		6.65362	1.05411		8.5	5.13155	5.40829	5.47945		5.12337	4.81113	4.53896									------------------------------------------------------------
7.04501	1.54181		7.04501	1.02135		9	5.30107	5.40207	4.88297		5.12837	4.87954	4.5395									t = -8.79029
7.4364	1.61396		7.4364	0.938782		9.5	4.9576	5.30603	4.75689		5.13155	4.88853	4.53966									p = 1.10647E-15
7.82779	1.6375		7.82779	0.926121		10	5.47538	5.16634	4.63646		5.16383	4.88868	4.54012
8.21918	1.62019		8.21918	1.01364		10.5	4.99394	5.48781	5.29881		5.20951	4.89663	4.54012									At the 0.05 level,
8.61057	1.58632		8.61057	1.13145		11	5.11062	4.74679	4.63646		5.21852	4.90082	4.54012									the two means are significantly different.
9.00196	1.52319		9.00196	1.23919		11.5	5.05566	5.11179	4.75689		5.26696	4.92288	4.56951
9.39335	1.44265		9.39335	1.33786		12	5.47988	4.9373	4.97234		5.30107	4.92922	4.57492
9.78474	1.36073		9.78474	1.41832		12.5	5.63116	4.93254	4.83102		5.3055	4.93254	4.57625									Independent t-Test on Data1 col(MAD_BE) and col(MAD_Normal):
10.1761	1.31386		10.1761	1.45565		13	5.50676	4.88853	5.04111		5.30869	4.9373	4.57657
10.5675	1.33384		10.5675	1.44579		13.5	5.11023	4.69667	4.93282		5.31502	4.95542	4.58098									Data	Mean	Variance	N
10.9589	1.43074		10.9589	1.40921		14	5.33217	5.59584	4.63646		5.32581	5.00237	4.58136									------------------------------------------------------------
11.3503	1.53981		11.3503	1.35848		14.5	5.45208	4.80834	4.69667		5.33168	5.06843	4.5882									MAD_BE	5.04564	0.12442	57
11.7417	1.55888		11.7417	1.28422		15	5.4004	5.77288	4.69542		5.33217	5.09529	4.59053									MAD_Normal	4.82481	0.09128	129
12.1331	1.4932		12.1331	1.15688		15.5	5.3055	4.73898	4.62083		5.33557	5.10425	4.59245									------------------------------------------------------------
12.5245	1.40477		12.5245	1.01341		16	5.58492	5.6548	4.81199		5.34097	5.11179	4.59283									t = -4.36097
12.9159	1.32772		12.9159	0.955215		16.5	4.68988	4.92288	4.8817		5.35043	5.11492	4.62083									p = 2.15253E-5
13.3072	1.26179		13.3072	1.02589		17	5.30869	4.92922	4.52321		5.3685	5.16634	4.63094
13.6986	1.15576		13.6986	1.13441		17.5	5.31502	4.69537	5.12419		5.38016	5.19038	4.63422									At the 0.05 level,
14.09	1.00933		14.09	1.19056		18	5.47428	5.55107	4.46335		5.39502	5.2386	4.63585									the two means are significantly different.
14.4814	0.864143		14.4814	1.19381		18.5	4.62203	4.55216	4.45069		5.4004	5.25897	4.63646
14.8728	0.748192		14.8728	1.19067		19	5.04383	4.79491	4.67972		5.40639	5.25935	4.63646
15.2642	0.666164		15.2642	1.20914		19.5	5.47945	5.11492	5.00057		5.45208	5.29581	4.63646
15.6556	0.618954		15.6556	1.21826							5.46162	5.29881	4.63646
16.047	0.631149		16.047	1.15694							5.47428	5.29881	4.63646
16.4384	0.670101		16.4384	1.04402							5.47538	5.3047	4.63646
16.8298	0.708511		16.8298	0.92226							5.47945	5.30603	4.63646
17.2211	0.754677		17.2211	0.810879							5.47945	5.30894	4.63807
17.6125	0.765465		17.6125	0.701859							5.47988	5.40207	4.64449
18.0039	0.669159		18.0039	0.56868							5.50676	5.40829	4.64449
18.3953	0.492161		18.3953	0.456001							5.58492	5.41242	4.64449
18.7867	0.34745		18.7867	0.393841							5.59696	5.42474	4.64449
19.1781	0.292976		19.1781	0.388306							5.63116	5.47945	4.64695
19.5695	0.290565		19.5695	0.421154							5.63163	5.48781	4.651
19.9609	0.330418		19.9609	0.48785							5.6534	5.53548	4.67972
20.3523	0.398773		20.3523	0.590813							5.68306	5.55107	4.69449
20.7436	0.478111		20.7436	0.670498							5.69765	5.59584	4.69542
21.135	0.550449		21.135	0.674057							5.82153	5.59636	4.69667
21.5264	0.576439		21.5264	0.613983								5.6548	4.69667
21.9178	0.556488		21.9178	0.568115								5.77288	4.69667
22.3092	0.502308		22.3092	0.566406									4.69667
22.7006	0.41671		22.7006	0.596203									4.70611
23.092	0.312264		23.092	0.663673									4.74625
23.4834	0.204647		23.4834	0.739147									4.74641
23.8748	0.11084		23.8748	0.830975									4.74713
24.2661	0.0366974		24.2661	0.932884									4.75141
24.6575	0		24.6575	1.01019									4.75463
25.0489	0.0520554		25.0489	1.06659									4.7564
25.4403	0.171368		25.4403	1.09769									4.75689
25.8317	0.300892		25.8317	1.1682									4.75689
26.2231	0.399101		26.2231	1.3147									4.75689
26.6145	0.479462		26.6145	1.47479									4.75689
27.0059	0.574711		27.0059	1.62456									4.75689
27.3973	0.66655		27.3973	1.7231									4.75689
27.7887	0.704613		27.7887	1.79422									4.76123
28.18	0.668877		28.18	1.86344									4.79287
28.5714	0.60675		28.5714	1.92077									4.80522
28.9628	0.57122		28.9628	2.00621									4.81199
29.3542	0.557022		29.3542	2.09601									4.81202
29.7456	0.540699		29.7456	2.19425									4.81621
30.137	0.551201		30.137	2.33234									4.8171
30.5284	0.609177		30.5284	2.47741									4.8171
30.9198	0.72522		30.9198	2.65676									4.82236
31.3112	0.865345		31.3112	2.87828									4.82522
31.7025	0.956886		31.7025	3.09478									4.83102
32.0939	0.962723		32.0939	3.23609									4.87731
32.4853	0.910515		32.4853	3.25512									4.87731
32.8767	0.85466		32.8767	3.25764									4.87732
33.2681	0.816773		33.2681	3.29781									4.87896
33.6595	0.806969		33.6595	3.34823									4.87992
34.0509	0.865494		34.0509	3.38428									4.8817
34.4423	0.975292		34.4423	3.39718									4.88297
34.8337	1.13097		34.8337	3.41399									4.88675
35.2251	1.31308		35.2251	3.45825									4.90648
35.6164	1.48042		35.6164	3.50606									4.91016
36.0078	1.61366		36.0078	3.52428									4.91267
36.3992	1.71014		36.3992	3.5068									4.93282
36.7906	1.71223		36.7906	3.46391									4.97234
37.182	1.54984		37.182	3.37892									4.99774
37.5734	1.3228		37.5734	3.26524									4.99774
37.9648	1.19353		37.9648	3.13818									5.00057
38.3562	1.2055		38.3562	3.01422									5.01552
38.7475	1.27027		38.7475	2.90393									5.04111
39.1389	1.33442		39.1389	2.81194									5.05041
39.5303	1.39009		39.5303	2.77088									5.05248
39.9217	1.48114		39.9217	2.73983									5.0542
40.3131	1.60751		40.3131	2.69589									5.05673
40.7045	1.74352		40.7045	2.65385									5.05796
41.0959	1.85026		41.0959	2.61465									5.1186
41.4873	1.91868		41.4873	2.58567									5.12419
41.8787	1.94568		41.8787	2.5551									5.12724
42.2701	1.91238		42.1262	2.53533									5.13277
42.6615	1.84564												5.17838
43.0528	1.75452												5.17838
43.4442	1.65993												5.23007
43.8356	1.54044												5.26597
44.227	1.40053												5.27066
44.6184	1.27486												5.29881
45.0098	1.2205												5.29881
45.4012	1.27353												5.29881
45.7926	1.35315												5.29881
46.184	1.395												5.29881
46.5753	1.39762												5.3
46.9667	1.3563												5.33397
47.3581	1.29614												5.46227
47.7495	1.21783												5.47945
48.1409	1.07218												5.47945
48.2961	1.00109												5.47945
													5.59988
													5.62177
													5.65217
													5.69294
