# Supplementary material for: Deciphering the actin structure-dependent preferential cooperative binding of cofilin
Source: eLife. 2024 Aug 2;13:RP95257. doi: 10.7554/eLife.95257 (PMC11296705; doi:10.7554/eLife.95257)
Supplement: Figure 6—source data 1. — These data are presented as origin plots in Figure 6B–C. [file elife-95257-fig6-data1.xlsx]

## Sheet: Figure 6
Figure 6B	Time (s)	Protomer Pairs(5)	HHP5	MAD5		MAD5	Mean MAD5	SD5	MAD6	Mean MAD6	SD6		Independent t-Test on Data1 col(MAD5BE) and col(MAD6PE):							Figure 6C (BE)	Distance (nm)	Data 1	Data 2	Data 3			D1	D2	D3	D4	D5	D6	D7	D8	D9	γ1	γ2	γ3	γ4		D1 on BE (nm)		Mean D1 (nm)	SD (nm)	N		Figure 6C (PE)	Distance(nm)	Data 1
	0	7.5	37.8952	5.05269		5.05269	5.00862	0.199814	5.41327	5.44101	0.26219		Data	Mean	Variance	N					0	1.00045	1.00007	1.00077		Fitting Line 1	8.89281	-7.60908	9.22452	4.66161	16.1515	2.52476	6.0513	4.40339	15.3562	-3.01351	-0.53992	-3.86868	-0.539943		8.89281		12.6404	6.6205	50			0	1.00017
	0.5	7.5	37.5199	5.00265		5.00265			5.75171				------------------------------------------------------------								0.293542	0.998167	0.994585	0.99765		Fitting Line 2	27.1849	2.06607	5.29885	3.394	7.00126	7.3507	6.55742	4.29532	8.20354	2.65052	-2.24745	-0.056389	-0.455637		27.1849							0.293542	0.994444
	1	7.5	36.316	4.84214		4.84214			5.88547				MAD5BE	5.00862	0.04356	12					0.587084	0.993578	0.988127	0.991019		Fitting Line 3	19.6688	0.000284426	0.183429	4.01591	6.19543	-3.08972	8.49243	1.59941	4.82476	3.37694	1.67196	0.980873	-2.21829		20.8252							0.587084	0.988049
	1.5	7.5	37.0183	4.93577		4.93577			5.35043				MAD6PE	5.44101	0.07499	12					0.880626	0.987379	0.98262	0.981869																	7.38259							0.880626	0.982581
	2	7.5	35.8352	4.77803		4.77803			4.96497				------------------------------------------------------------								1.17417	0.979268	0.974893	0.970012																	23.5268							1.17417	0.974899
	2.5	7.5	39.1012	5.21349		5.21349			5.34252				t = 4.35027								1.46771	0.970029	0.967619	0.956509																	6.81983							1.46771	0.967643
	3	8.5	43.3075	5.095		5.095			5.52337				p = 2.5643E-4								1.76125	0.959516	0.958639	0.941343																	10.5907							1.76125	0.958592
	3.5	7.5	36.4703	4.8627		4.8627			5.80621												2.05479	0.948343	0.949634	0.925366																	9.09127							2.05479	0.949525
	4	8.5	42.5947	5.01115		5.01115			5.54942				At the 0.05 level,								2.34834	0.936547	0.939659	0.908759																	5.88018							2.34834	0.939325
	4.5	6.5	34.6248	5.3269		5.3269			5.18447				the two means are significantly different.								2.64188	0.924489	0.929244	0.892035																	19.6688							2.64188	0.928709
	5	7.5	34.9581	4.66107		4.66107			5.22556												2.93542	0.912325	0.918488	0.87546																	10.5585							2.93542	0.917559
	5.5	6.5	34.592	5.32185		5.32185			5.2947												3.22896	0.900154	0.90704	0.859177																	8.14102							3.22896	0.905708
																					3.52251	0.888163	0.895613	0.843412																	7.33632							3.52251	0.893706
																					3.81605	0.876253	0.883457	0.828013																	8.45285							3.81605	0.880883
	Time (s)	Protomer Pairs(6)	HHP6	MAD6																	4.10959	0.864567	0.87139	0.81309																	10.6713							4.10959	0.86803
	0	4.5	24.3597	5.41327																	4.40313	0.852922	0.858746	0.798363																	8.86699							4.40313	0.854414
	0.5	4.5	25.8827	5.75171																	4.69667	0.841384	0.846058	0.783826																	7.80486							4.69667	0.84068
	1	4.5	26.4846	5.88547																	4.99022	0.829802	0.833049	0.76924																	7.66796							4.99022	0.826371
	1.5	4.5	24.0769	5.35043																	5.28376	0.81817	0.819804	0.754534																	18.1718							5.28376	0.811766
	2	5.5	27.3073	4.96497																	5.5773	0.806444	0.806499	0.739631																	21.7671							5.5773	0.796833
	2.5	4.5	24.0413	5.34252																	5.87084	0.794583	0.792842	0.724459																	17.2483							5.87084	0.78146
	3	5.5	30.3786	5.52337																	6.16438	0.782663	0.779306	0.709122																	27.7952							6.16438	0.765983
	3.5	4.5	26.1279	5.80621																	6.45793	0.770647	0.765452	0.693599																	12.6057							6.45793	0.750037
	4	4.5	24.9724	5.54942																	6.75147	0.75869	0.751786	0.678114																	15.9069							6.75147	0.734132
	4.5	5.5	28.5146	5.18447																	7.04501	0.746788	0.737976	0.662715																	8.93804							7.04501	0.717867
	5	5.5	28.7406	5.22556																	7.33855	0.73511	0.724327	0.647642																	5.74093							7.33855	0.701689
	5.5	5.5	29.1208	5.2947																	7.63209	0.723688	0.710771	0.632992																	18.2382							7.63209	0.685357
																					7.92564	0.712636	0.697311	0.618925																	13.4533							7.92564	0.669083
																					8.21918	0.70201	0.68415	0.605544																	5.45708							8.21918	0.652879
																					8.51272	0.691831	0.671044	0.592875																	11.6793							8.51272	0.636679
																					8.80626	0.68215	0.658342	0.580983																	12.0057							8.80626	0.620722
																					9.0998	0.672898	0.645713	0.569764																	10.112							9.0998	0.604743
																					9.39335	0.664097	0.633476	0.559219																	14.5227							9.39335	0.589092
																					9.68689	0.655621	0.621394	0.549173																	35							9.68689	0.573455
																					9.98043	0.647452	0.609608	0.539566																	5.88564							9.98043	0.558141
																					10.274	0.639463	0.598089	0.530232																	11.6794							10.274	0.542946
																					10.5675	0.631598	0.586756	0.521076																	9.31442							10.5675	0.528022
																					10.8611	0.623775	0.575783	0.512003																	9.77398							10.8611	0.51336
																					11.1546	0.615919	0.564934	0.502918																	14.245							11.1546	0.498919
																					11.4481	0.608013	0.55448	0.493823																	12.0765							11.4481	0.484879
																					11.7417	0.599987	0.544161	0.484651																	10.039							11.7417	0.471049
																					12.0352	0.591879	0.534205	0.475477																	8.79507							12.0352	0.457715
																					12.3288	0.583639	0.524453	0.466276																	5.64295							12.3288	0.444635
																					12.6223	0.575327	0.514981	0.457141																	25.2111							12.6223	0.432076
																					12.9159	0.566923	0.505796	0.448082																	18.4114							12.9159	0.419857
																					13.2094	0.558464	0.49679	0.439148																	6.11126							13.2094	0.408117
																					13.5029	0.549956	0.488117	0.430359																	7.20496							13.5029	0.39681
																					13.7965	0.541388	0.479548	0.421688																	12.3152							13.7965	0.385904
																					14.09	0.532774	0.471286	0.413137																	7.17839							14.09	0.375496
																					14.3836	0.524054	0.463098	0.404606																	10.1298							14.3836	0.365407
																					14.6771	0.515235	0.455126	0.39607																								14.6771	0.355831
																					14.9706	0.506236	0.44724	0.387401																								14.9706	0.346524
																					15.2642	0.497051	0.439448	0.378554																								15.2642	0.337686
																					15.5577	0.487611	0.431772	0.369436																								15.5577	0.329111
																					15.8513	0.477902	0.424084	0.360003																								15.8513	0.32092
																					16.1448	0.467902	0.416532	0.35024																								16.1448	0.313023
																					16.4384	0.457597	0.408914	0.340128																								16.4384	0.30541
																					16.7319	0.447024	0.401415	0.329736																								16.7319	0.29813
																					17.0254	0.43618	0.393862	0.319082																								17.0254	0.291048
																					17.319	0.425146	0.386373	0.308284																								17.319	0.284317
																					17.6125	0.413939	0.378883	0.297389																								17.6125	0.277728
																					17.9061	0.402649	0.371383	0.28651																								17.9061	0.271462
																					18.1996	0.391313	0.363938	0.275705																								18.1996	0.265319
																					18.4931	0.379999	0.35642	0.265028																								18.4931	0.259422
																					18.7867	0.368753	0.348981	0.254526																								18.7867	0.253652
																					19.0802	0.357601	0.341441	0.244179																								19.0802	0.248019
																					19.3738	0.346591	0.333959	0.234009																								19.3738	0.242523
																					19.6673	0.335709	0.326394	0.223951																								19.6673	0.23705
																					19.9609	0.324996	0.318829	0.214006																								19.9609	0.231712
																					20.2544	0.314424	0.311238	0.204114																								20.2544	0.226318
																					20.548	0.304021	0.303588	0.194276																								20.548	0.221031
																					20.8415	0.293773	0.295978	0.184485																								20.8415	0.215661
																					21.135	0.283699	0.288285	0.174757																								21.135	0.210349
																					21.4286	0.273817	0.280679	0.165154																								21.4286	0.204979
																					21.7221	0.264139	0.27302	0.155714																								21.7221	0.199606
																					22.0157	0.254719	0.265465	0.146546																								22.0157	0.194235
																					22.3092	0.245564	0.257933	0.137702																								22.3092	0.188805
																					22.6027	0.236745	0.250497	0.12929																								22.6027	0.183434
																					22.8963	0.228268	0.243181	0.121359																								22.8963	0.177971
																					23.1898	0.220193	0.235946	0.113965																								23.1898	0.172591
																					23.4834	0.212525	0.228917	0.107137																								23.4834	0.167116
																					23.7769	0.205289	0.221975	0.100857																								23.7769	0.161701
																					24.0705	0.198484	0.215292	0.095126																								24.0705	0.15622
																					24.364	0.192092	0.208739	0.0898732																								24.364	0.150738
																					24.6575	0.186103	0.20246	0.0850824																								24.6575	0.145237
																					24.9511	0.180459	0.196392	0.0806809																								24.9511	0.139665
																					25.2446	0.175141	0.190593	0.0766536																								25.2446	0.134125
																					25.5382	0.170072	0.185104	0.0729746																								25.5382	0.128474
																					25.8317	0.165224	0.179883	0.0696437																								25.8317	0.122891
																					26.1253	0.160527	0.175062	0.0666984																								26.1253	0.117206
																					26.4188	0.155945	0.170531	0.0641546																								26.4188	0.111604
																					26.7123	0.15144	0.166458	0.0620904																								26.7123	0.105964
																					27.0059	0.146972	0.162721	0.0605264																								27.0059	0.100393
																					27.2994	0.142539	0.159452	0.0595293																								27.2994	0.0948785
																					27.593	0.138107	0.15658	0.0591031																								27.593	0.0894013
																					27.8865	0.133698	0.154142	0.059252																								27.8865	0.08407
																					28.18	0.129289	0.152146	0.0599492																								28.18	0.0787421
																					28.4736	0.124908	0.150522	0.0611253																								28.4736	0.0736076
																					28.7671	0.120537	0.149349	0.0627322																								28.7671	0.0684612
																					29.0607	0.116188	0.148475	0.064664																								29.0607	0.063498
																					29.3542	0.111851	0.148009	0.0668738																								29.3542	0.0585431
																					29.6477	0.107505	0.147777	0.0692722																								29.6477	0.0537134
																					29.9413	0.103148	0.147862	0.0718284																								29.9413	0.048954
																					30.2348	0.0987324	0.148133	0.0745062																								30.2348	0.0442458
																					30.5284	0.0942646	0.148594	0.0772927																								30.5284	0.039703
																					30.8219	0.0897016	0.149211	0.080209																								30.8219	0.0351598
																					31.1155	0.0850571	0.149889	0.0832518																								31.1155	0.0308868
																					31.409	0.0803255	0.150689	0.0864707																								31.409	0.0266167
																					31.7025	0.0755326	0.15145	0.0898561																								31.7025	0.0226955
																					31.9961	0.0707291	0.152282	0.0934383																								31.9961	0.0188548
																					32.2896	0.0659577	0.153017	0.0971869																								32.2896	0.0153686
																					32.5832	0.0613191	0.153748	0.101076																								32.5832	0.0121282
																					32.8767	0.0568744	0.154367	0.105054																								32.8767	0.00908702
																					33.1703	0.0527419	0.154885	0.109036																								33.1451	0.00655451
																					33.4638	0.0489943	0.155299	0.112965
																					33.7573	0.0457178	0.155516	0.116733
																					34.0509	0.0429765	0.15563	0.120295
																					34.3444	0.0407857	0.155479	0.123567
																					34.638	0.0391757	0.155198	0.126533
																					34.9315	0.0381015	0.15463	0.129167
																					35.2251	0.0375543	0.153873	0.131475
																					35.5186	0.0374847	0.152854	0.133494
																					35.8121	0.0378553	0.151573	0.135238
																					36.1057	0.0386441	0.150081	0.136772
																					36.3992	0.0397845	0.14827	0.138094
																					36.6928	0.0412528	0.146292	0.139246
																					36.9863	0.0429534	0.143985	0.140198
																					37.2799	0.0448207	0.141516	0.140928
																					37.5734	0.0467529	0.138763	0.141386
																					37.8669	0.0486415	0.135813	0.141492
																					38.1605	0.0504102	0.132657	0.141197
																					38.454	0.0519435	0.12925	0.140406
																					38.7475	0.0532071	0.125713	0.139102
																					39.0411	0.0541235	0.121889	0.13723
																					39.3346	0.0546955	0.117974	0.134814
																					39.6282	0.0549136	0.113789	0.131878
																					39.9217	0.0547994	0.109498	0.12848
																					40.2153	0.0544097	0.105012	0.124717
																					40.5088	0.0537618	0.100369	0.120653
																					40.8023	0.0529416	0.0956415	0.116411
[truncated: 21 more columns]
