# Supplementary material for: Deciphering the actin structure-dependent preferential cooperative binding of cofilin
Source: eLife. 2024 Aug 2;13:RP95257. doi: 10.7554/eLife.95257 (PMC11296705; doi:10.7554/eLife.95257)
Supplement: Figure 7—source data 1. — These data are presented as origin plots in Figure 7B–C. [file elife-95257-fig7-data1.xlsx]

## Sheet: Figure 7
Figure 7B	Peak Height (nm)	Time (s)	P1 (nm)	P2 (nm)	P3 (nm)	P4 (nm)	P5 (nm)	P6 (nm)	HHP (nm)	Time (s)	Between P1 and P2 (nm)	Between P2 and P3 (nm)	Between P3 and P4 (nm)	Between P4 and P5 (nm)	Between P5 and P6 (nm)		Figure 7C	HHP(nm)	Peak Height(nm)		N (peak height)			Single Gaussian fit to Peak Height						Statistical F-test for Peak Height		Bin	Number	Single	Double	Chi-Single	Chi-Double	SingleGauss	mean			CHITEST	Pearson's chi-squared test
		0	11.04	11.18	9.32	9.47	9	9.35		0	26.0623	35.0105	35.0451	38.0464	37.4785			26.0623	11.04		726			Mean	SD	Area						7.575	4	19.6875	4.23531	12.5002	0.013074	y0	0			single	4.41365e-15
		0.5	10.47	10.48	8.86	8.77	8.31	8.42		0.5	23.98	32.0431	38.0021	37.0552	38.1843			23.98	10.47					---------------------------------------------								7.825	15	25.9267	13.8617	4.60503	0.0934751	x1	9.55914			double	0.969575
		1	10.5	10.38	8.34	8.65	8.57	8.31		1	22.98	38.01	33.983	36.0333	40.0555			22.98	10.5			Proportion(%)		9.55914	1.29936	205.753						8.075	38	32.9025	33.0559	0.789756	0.739469	w1	2.59872
		1.5	10.39	10.59	8.49	8.44	7.94	8.63		1.5	24.98	31.0571	37.0332	38.0142	35.105			24.98	10.39		Area1	44.8525										8.325	55	40.2376	57.4618	5.41605	0.105468	A1	205.753
		2	10.81	11.3	9.04	9.15	8.9	8.82		2	25.018	28.1294	44.0201	33.0348	36.0833			25.018	10.81		Area2	55.1475		Double Gauss(2) fit to Peak Height								8.575	66	47.4197	72.9654	7.28027	0.664927	chi^2	125.979			Prob (F-statistic), p	0.00398388
		2.5	10.35	10.48	8.66	8.54	8.27	8.93		2.5	25	32.1285	36.0522	36.002	39.0512			25	10.35													8.825	77	53.8528	68.3934	9.94922	1.08305	dof	12
		3	10.43	10.51	8.82	9.17	8.96	9.09		3	21.0243	33.0245	39.9815	35.98	38.0537			21.0243	10.43					Peak	Area	Center	Width	Height				9.075	51	58.936	49.9256	1.06863	0.0231203
		3.5	10.23	10.37	8.96	8.56	8.71	8.82		3.5	24.98	32.0032	38.0311	34.1061	40.1154			24.98	10.23					---------------------------------------------------------------------------								9.325	30	62.1551	35.6146	16.635	0.885137
		4	10.67	10.47	8.57	8.47	8.2	8.69		4	21.0101	34.0156	37.99	35.0337	41.9631			21.0101	10.67					1	81.641	8.6358	0.88842	73.322				9.575	33	63.1677	37.5247	14.4075	0.545592	DoubleGauss
		4.5	11.15	11.06	9.12	9.37	8.99	9.48		4.5	23.99	29.1586	40.0015	34.0041	44.0302			23.99	11.15					2	100.38	10.293	1.0398	77.028				9.825	53	61.8638	53.4034	1.27	0.00304684	y0	0
		5	10.22	10.76	9.59	8.7	8.29	7.89		5	24.9781	22.1923	46.0209	36.02	37.9602			24.9781	10.22					---------------------------------------------------------------------------								10.075	85	58.385	70.929	12.1326	2.79142	x1	8.6358
		5.5	10.57	10.9	9.58	9.01	8.88	9.06		5.5	25.99	20.2336	50.011	34.025	38.99			25.99	10.57													10.325	68	53.0993	76.9334	4.18143	1.03732	w1	0.88842
		6	10.74	10.84	8.75	9.28	9.29	9.15		6	21.1149	23.9526	47.06	33.9941	40.0013			21.1149	10.74													10.575	59	46.5371	66.4944	3.33764	0.844678	A1	81.641
		6.5	10.39	10.84	8.68	8.48	8.61	8.45		6.5	22.1645	30.0001	45.0244	32.0887	35.0494			22.1645	10.39													10.825	54	39.3036	45.6319	5.49524	1.53456	x2	10.293
		7	10.85	10.87	9.6	9.45	8.6	9.4		7	21.0438	28.0161	39.9604	36.0423	38.0316			21.0438	10.85													11.075	26	31.9882	24.8519	1.12098	0.0530438	w2	1.0398
		7.5	9.94	10.03	9.3	8.14	7.92	8.07		7.5	24.9992	26.99	46.0435	35.027	33.0288			24.9992	9.94													11.325	12	25.0882	10.7407	6.82792	0.147657	A2	100.38
		8	10.15	10.09	9.16	8.36	8.08	9.06		8	24.01	24.0121	42.9814	36.0641	39.0297			24.01	10.15													11.575	0	18.9614	3.68368	18.9614	3.68368	chi^2	14.2487
		8.5	10.54	10.46	9.67	8.17	8.57	8.8		8.5	24.0288	22.3205	48.018	32.1511	41.0278			24.0288	10.54																			dof	9
		9	10.04	10.12	8.96	8.69	8.14	8.87		9	23.99	22.0455	47.0198	32.1811	39.1518			23.99	10.04
		9.5	10.34	10.2	9.66	8.4	8.44	8.7		9.5	23.0184	30.0184	35.99	35.354	39.1206			23.0184	10.34
		10	10.48	10.26	9.73	8.56	8.28	8.7		10	24.01	25.0092	37.0224	34.0078	39.2225			24.01	10.48		N (HHP)			Single Gaussian fit to HHP						Statistical F-test for HHP		Bin	Number	Single	Double	Chi-Single	Chi-Double	SingleGauss	mean			CHITEST	Pearson's chi-squared test
		10.5	10.8	10.03	9.34	8.58	8.41	9.01		10.5	22.0893	28.9972	38.0309	35.0771	39.0746			22.0893	10.8		605			Mean	SD	Area						20	1	19.7848	6.03703	17.8353	4.20267	y0	0			single	5.04821e-11
		11	10.8	10.15	9.54	8.26	8.45	9.11		11	22.0488	25.9977	38.0156	40.0351	35.2332			22.0488	10.8					---------------------------------------------								21	12	21.704	12.1884	4.33874	0.00291125	x1	29.0228			double	0.835226
		11.5	10.14	10.55	9.44	8.38	8.16	9.07		11.5	23.9201	28.0668	37.98	34.1377	39.1916			23.9201	10.14			Proportion(%)		29.0228	9.59445	740.427						22	24	23.5522	21.2547	0.00851367	0.354586	w1	19.1889
		12	10.14	10.45	9.82	8.74	8.44	8.32		12	24.0021	24.98	37.01	35.1218	41.0632			24.0021	10.14		Area1	50.8785										23	25	25.2816	32.0176	0.00313734	1.53812	A1	740.427
		12.5	10.48	9.96	9.4	8.3	8.18	9.57		12.5	24.0783	25.0192	38.0053	39.09	32.3677			24.0783	10.48		Area2	49.1215		Double Gauss(2) fit to HHP								24	52	26.8448	41.6717	23.5718	2.55989	chi^2	102.428			Prob (F-statistic), p	0.0218346
		13	10.61	10.65	9.83	9.43	8.24	9.01		13	27.0839	27.96	32.083	39.0659	33.3479			27.084	10.61													25	46	28.1967	46.8881	11.2409	0.016821	dof	12
		13.5	9.96	10.05	9.56	9.81	8.42	8.71		13.5	27.0241	27.02	34.06	35.115	40.1268			27.0241	9.96					Peak	Area	Center	Width	Height				26	40	29.2967	45.6842	3.91038	0.707241
		14	10.18	9.84	9.33	8.63	8.16	8.73		14	27.074	25.98	36.0649	35.0052	35.1292			27.074	10.18					---------------------------------------------------------------------------								27	38	30.1107	38.7312	2.06709	0.0138051
		14.5	9.81	10.07	9.63	8.59	7.8	8.47		14.5	23.96	26.99	38.0034	31.1369	37.019			23.96	9.81					1	308.12	25.294	5.2246	47.055				28	32	30.6129	29.0019	0.0628498	0.309938	DoubleGauss
		15	10.3	10.09	9.91	8.65	8.42	8.5		15	28.1419	25.9956	34.0171	35.0677	37.074			28.1419	10.3					2	297.48	36.933	7.1701	33.103				29	21	30.7873	20.0632	3.11136	0.0437373	y0	0
		15.5	9.95	10.19	9.57	8.96	8.31	8.83		15.5	25.06	27.9968	33.1975	35.0203	38.1958			25.06	9.95					---------------------------------------------------------------------------								30	13	30.6281	14.3899	10.1459	0.13424	x1	25.294
		16	10.27	9.85	8.94	8.09	8.45	8.92		16	24.0096	27.0953	35.1	38.1849	35.1435			24.0096	10.27													31	13	30.1405	12.7478	9.74756	0.00498911	w1	5.2246
		16.5	10.45	9.95	9.47	8.48	7.97	8.75		16.5	25.0844	23.0292	34.0047	39.0303	36.4638			25.0844	10.45													32	22	29.3402	14.5894	1.83633	3.76423	A1	308.12
		17	10.15	10.15	9.54	8.52	8.11	8.74		17	25.0304	26.9889	34.0038	39.0147	35.5103			25.0304	10.15													33	14	28.2526	18.7422	7.18999	1.19991	x2	36.933
		17.5	9.93	10.24	9.91	8.98	8.42	8.81		17.5	23.98	28.0079	33	40.0415	34.3698			23.98	9.93													34	20	26.9113	23.8705	1.77495	0.627578	w2	7.1701
		18	11.04	10.47	9.95	8.44	8.93	8.95		18	25.0959	24.98	35.0876	37.0967	36.0583			25.0959	11.04													35	37	25.3568	28.6722	5.34628	2.4188	A2	297.48
		18.5	9.61	10.38	9.35	8.74	8.38	9.25		18.5	23.9773	26.0273	35.0205	38.1074	38.1007			23.9773	9.61													36	26	23.6339	32.0117	0.236879	1.12899	chi^2	19.0285
		19	10.32	10.33	9.81	8.87	8.15	8.5		19	24.98	25.01	31.9986	38.1343	39.1229			24.98	10.32																			dof	9
		19.5	10.09	10.37	9.55	8.26	8.69	9.12		19.5	24.0076	28.0578	34.0078	39.2175	35.1127			24.0076	10.09
		20	10.17	9.86	8.91	8.29	7.55	8.82		20	21.97	28.0368	32.1004	37.0475	39.4225			21.97	10.17
		20.5	10.76	10.57	9.26	9.12	8.5	8.44		20.5	22.01	26.1015	29.2115	42.059	37.1089			22.01	10.76
		21	9.5	10	10.17	8.84	7.83	9.03		21	22.0192	26.9701	28.03	47.0502	34.3401			22.0192	9.5
		21.5	9.4	9.8	10.09	7.78	8.13	8.52		21.5	28.0628	23.9788	34.0394	35.2221	37.0241			28.0628	9.4
		22	9.88	10.24	9.95	8.81	7.95	8.78		22	25.0204	25.99	36.1356	35.9859	33.7291			25.0204	9.88
		22.5	10.18	10.4	10.65	8.77	8.57	8.84		22.5	24.0212	26	37.0462	33.1343	35.1383			24.0212	10.18
		23	9.88	9.32	9.96	8.84	7.99	8.81		23	23.0392	27.0064	30.2457	43.0703	33.1354			23.0392	9.88
		23.5	9.79	9.91	10.02	8.84	7.59	8.96		23.5	27.0862	22.0232	32.0543	40.0441	39.7783			27.0862	9.79
		24	10.31	10.21	10.48	9.06	9.11	8.96		24	23.0113	27.97	30.1179	41.2348	35.4892			23.0113	10.31
		24.5	10.24	9.75	10.06	8.55	8.15	8.32		24.5	25.0943	25	32.1621	39.0554	35.4007			25.0943	10.24
		25	10.25	10.69	10.59	8.7	8.26	8.24		25	27.074	24.98	31.2692	39.0261	37.4652			27.074	10.25
		25.5	9.85	9.85	10.48	8.81	8.37	8.67		25.5	24.0376	23.0684	30.4089	40.99	34.5207			24.0376	9.85
		26	9.95	9.93	9.97	8.97	8.12	8.26		26	26.0192	24	32.0338	39.2056	36.3315			26.0192	9.95
		26.5	9.54	9.89	10.19	7.86	7.88	8.64		26.5	25	23.9984	32.1517	38.1969	37.6251			25	9.54
		27	10.02	10.06	9.98	8.09	8.4	8.46		27	26.0715	25.0312	33.1289	39.3079	34.24			26.0715	10.02
		27.5	9.47	10.38	10.2	8.76	8.2	8.33		27.5	26.0616	24.02	30.2794	42.0878	34.2662			26.0616	9.47
		28	9.72	9.87	10.36	9.09	8.44	8.61		28	27.9972	25.0062	30.1427	39.1946	37.4916			27.9972	9.72
		28.5	9.97	10.4	10.61	8.89	8.2	8.88		28.5	22	29.0046	27.164	42.0809	34.8953			22	9.97
		29	9.91	10.11	10.02	8.34	8.63	8.9		29	27.077	23.96	31.0285	41.1719	35.911			27.077	9.91
		29.5	10.36	10.12	9.99	8.51	8.31	8.95		29.5	24.1281	29.1438	28.1294	41.1089	35.4108			24.1281	10.36
		30	10	10.11	10.33	8.11	8.13	8.52		30	24.028	26.9802	32.0279	37.2143	37.4588			24.028	10
		30.5	10.2	10.22	9.73	8.3	8.12	8.8		30.5	26.1768	26.9971	29.0503	37.1164	38.0771			26.1768	10.2
		31	10.14	9.84	10.06	8.93	8.28	8.91		31	25.0951	23.98	23.0877	44.9945	37.5228			25.0951	10.14
		31.5	9.76	10.17	10.2	8.77	7.84	8.94		31.5	25	25.0084	27.0877	40.0899	35.4544			25	9.76
		32	10	10.41	10.37	9.01	8.2	8.58		32	23.99	29.0476	28.297	38.0156	37.1214			23.99	10
		32.5	10.23	10.56	10.38	8.35	8.28	8.84		32.5	27.0289	23.9792	32.0765	36.1124	36.1547			27.0289	10.23
		33	10.01	10.34	10.03	8.15	8.1	8.82		33	24.0629	28.134	29.0795	40.1498	35.5452			24.0629	10.01
		33.5	10.06	9.71	9.71	8.57	8.37	8.45		33.5	25.0775	23.99	32.0179	41.411	35.2493			25.0775	10.06
		34	10.31	10.82	10.48	9.07	8.56	8.46		34	25.9702	25.0636	35.0049	32.2528	40.3262			25.9702	10.31
		34.5	9.79	10.69	9.6	7.91	8.74	8.51		34.5	27.9501	25.3092	32.1123	37.2847	40.1657			27.9501	9.79
		35	10.2	9.7	10.01	8.07	8.14	8.05		35	27.1264	26.9882	26.1206	41.0661	35.2592			27.1264	10.2
		35.5	10.12	9.76	9.89	8.04	7.92	8.86		35.5	22.127	24.98	30.9903	38.1304	37.4394			22.127	10.12
		36	11.12	10.52	11.14	9.57	8.93	8.25		36	26.3463	27.9501	25.198	40.022	38.0074			26.3463	11.12
		36.5	10.47	10.56	10.52	8.83	8.31	8.99		36.5	27.0732	24	30.1238	37.0149	39.2097			27.0732	10.47
		37	10.19	10.13	10.2	9.08	8.25	8.75		37	23.0096	23.0117	28.0093	41.1124	37.5027			23.0096	10.19
		37.5	10.11	9.63	10.08	8.62	8.49	8.96		37.5	27.1728	20.9724	29.0462	39.4369	40.019			27.1728	10.11
		38	10.45	9.8	9.98	7.84	8.21	8.94		38	25.0828	26.0001	25.9901	42.0562	38.6017			25.0828	10.45
		38.5	10.31	10.37	10.21	8.43	7.77	8.48		38.5	23	30.2417	30.027	35.1175	39.1909			23	10.31
		39	10.76	10.55	10.74	8.91	8.09	8.57		39	26.0975	24.0013	33.01	40.1716	36.2271			26.0975	10.76
		39.5	9.69	10.01	10.15	8.78	7.86	8.76		39.5	22.9801	27.0633	31.0831	38.0159	39.2943			22.98	9.69
		40	9.82	9.63	9.83	8.09	7.51	8.67		40	25.1098	26.9801	30.9703	39.3327	35.3485			25.1098	9.82
		40.5	9.29	9.81	9.88	8.48	7.68	7.82		40.5	23.96	27.0961	30.9975	37.3508	38.2845			23.96	9.29
		41	9.99	10.32	10.4	9.07	8.05	8.78		41	23.0131	29.1448	32.9852	33.4184	40.2605			23.0131	9.99
		41.5	10.96	10.62	11.32	9.59	8.05	8.88		41.5	24.1782	28.0058	27.0485	37.1379	38.2879			24.1782	10.96
		42	10.56	10.9	11.04	8.47	8.62	9.08		42	23.0209	28.0186	27.0634	42.3491	35.5272			23.0209	10.56
		42.5	10.64	10.9	11.35	9.22	8.9	9.09		42.5	29.0256	23.0417	31.0258	39.0861	35.1275			29.0256	10.64
		43	10.74	10.96	11.19	9.51	8.91	9.07		43	24.0288	27.99	26.01	42.2919	32.2044			24.0288	10.74
		43.5	10.28	10.88	11.23	9.22	8.64	9.21		43.5	26.1712	21.0519	30.9946	36.063	35.6677			26.1712	10.28
		44	10.95	11.2	10.88	9.73	8.75	8.22		44	24.1082	30.0427	21.0178	46.1719	31.4431			24.1082	10.95
		44.5	10.38	10.85	10.63	9.53	8.98	9.55		44.5	22.99	26	26.1492	43.3061	34.38			22.99	10.38
		45	10.89	10.18	10.06	9.71	8.6	9.02		45	25.358	25.018	21.1793	49.0562	36.1285			25.358	10.89
		45.5	10.93	10.86	10.97	9.65	8.53	9.06		45.5	27.0548	22.0101	24.1173	46.1121	35.4078			27.0548	10.93
		46	10.6	10.61	10.41	9.49	8.77	8.94		46	29.0703	22.9988	23.1699	43.2174	38.0647			29.0703	10.6
		46.5	10.28	10.49	10.3	9.34	8.54	9.03		46.5	22.0201	26.0608	23.1734	46.272	36.8587			22.0201	10.28
		47	10.39	10.76	10.79	10.01	8.5	9.25		47	23.1024	29.986	22.209	38.3469	40.0063			23.1024	10.39
		47.5	10.51	10.85	10.52	9.85	8.11	9.11		47.5	24.0317	26.0668	24.0974	44.3775	34.9434			24.0317	10.51
		48	11.3	11.35	11.12	9.84	8.77	9.11		48	27.0961	21.0306	25.9892	43.2909	38.1057			27.0962	11.3
		48.5	10.42	9.93	10.05	9.49	8.47	9.41		48.5	24.2056	25.98	29.1606	39.3218	38.6215			24.2056	10.42
		49	10.13	10.19	10.27	9.23	8.83	8.37		49	23.0192	25.99	27.0601	40.4538	33.3766			23.0192	10.13
		49.5	10.74	10.8	11.07	10.55	8.65	8.83		49.5	28.0628	23.0001	24.1671	41.2056	40.6264			28.0628	10.74
		50	10.19	10.32	10.73	10.36	8.67	8.88		50	26.9993	21.0133	26.0388	42.2434	37.6989			26.9993	10.19
		50.5	10.86	10.85	10.71	10.18	8.79	9.19		50.5	23.98	24.1082	26.0922	41.0882	39.7948			23.98	10.86
		51	10.52	10.63	10.6	10.08	8.42	8.02		51	26	28.9956	22.0445	41.1196	36.6484			26	10.52
		51.5	10.47	10.57	11.05	9.82	8.51	9.02		51.5	27.9693	24.0408	24.0832	43.0201	39.5242			27.9693	10.47
		52	9.96	9.96	10.18	9.45	8.47	8.79		52	26	25.9966	24.2042	46.043	32.5871			26	9.96
		52.5	11.21	10.85	11.2	10.55	8.88	8.92		52.5	26.189	28.97	23.0449	38.086	40.6177			26.1889	11.21
		53	10.75	10.8	10.71	10.12	8.51	9.04		53	28.0514	24.0296	25.1758	39.0638	39.4634			28.0514	10.75
		53.5	11.06	11.01	10.83	10.75	8.83	8.81		53.5	26.02	28.0072	25.3133	41.1303	38.3044			26.02	11.06
		54	10.27	10.79	10.87	9.78	8.17	9.16		54	25.0373	28.0151	24.9803	29.0681	53.1472			25.0373	10.27
		54.5	10.27	10.28	10.5	10.89	10.58	9.08		54.5	25.0084	29.0159	23.0859	27.1584	35.1508			25.0084	10.27
		55	10.84	10.86	11.05	11.01	9.59	8.77		55	25.98	29.0066	25.0823	22.0664	39.2956			25.98	10.84
		55.5	10.63	10.44	10.72	10.8	10.01	9.42		55.5	27.0689	28.0158	23.0677	24.1156	39.3141			27.0689	10.63
		56	10.01	10.22	10.12	10.41	10.02	9.29		56	24.01	30.99	21.0333	26.0416	41.2604			24.01	10.01
		56.5	10.58	10.77	10.97	11.23	10.33	8.28		56.5	23.1008	27.97	22.1188	26.97	39.0787			23.1008	10.58
		57	10.01	10.42	10.56	10.83	10.05	9.25		57	22.0209	27	22.1197	30.95	38.1413			22.0209	10.01
		57.5	10.15	10.5	10.44	10.77	10.41	8.75		57.5	21.0851	27.0977	29.0617	22.0527	39.0228			21.0851	10.15
		58	10.39	10.59	10.09	10.25	9.88	8.72		58	25	24.0372	25.0691	29.1458	36.1231			25	10.39
		58.5	11.33	10.75	11	10.47	11.05	9.04		58.5	26.0623	22.02	29.98	28.0436	31.9931			26.0623	11.33
		59	10.01	10.41	10.16	10.49	10.41	10.69		59	22.0101	29.0265	25	22.055	31.5032			22.0101	10.01
		59.5	10.78	11.26	10.96	11.03	10.56	9.79		59.5	25.0296	28.0393	26.9701	24.0616	27.1143			25.0296	10.78
		60	10.79	10.76	10.91	11.32	11.35	10.25		60	28.0186	24.02	26.0088	26.0204	25.1917			28.0186	10.79
																		35.0105	11.18
																		32.0431	10.48
																		38.01	10.38
																		31.0571	10.59
																		28.1294	11.3
																		32.1285	10.48
																		33.0245	10.51
																		32.0032	10.37
																		34.0156	10.47
																		29.1586	11.06
																		22.1924	10.76
																		20.2336	10.9
																		23.9526	10.84
																		30.0001	10.84
																		28.0161	10.87
																		26.99	10.03
																		24.0121	10.09
																		22.3205	10.46
																		22.0455	10.12
																		30.0184	10.2
																		25.0092	10.26
																		28.9973	10.03
																		25.9977	10.15
																		28.0668	10.55
																		24.98	10.45
																		25.0192	9.96
																		27.96	10.65
																		27.02	10.05
																		25.98	9.84
																		26.9901	10.07
																		25.9956	10.09
																		27.9968	10.19
																		27.0953	9.85
																		23.0292	9.95
																		26.9889	10.15
																		28.0079	10.24
																		24.98	10.47
																		26.0273	10.38
																		25.01	10.33
																		28.0578	10.37
																		28.0368	9.86
																		26.1014	10.57
																		26.9701	10
																		23.9788	9.8
																		25.99	10.24
																		26	10.4
																		27.0064	9.32
																		22.0232	9.91
																		27.97	10.21
																		25	9.75
																		24.98	10.69
																		23.0684	9.85
																		24	9.93
																		23.9984	9.89
																		25.0312	10.06
																		24.02	10.38
																		25.0062	9.87
																		29.0046	10.4
																		23.96	10.11
																		29.1438	10.12
																		26.9801	10.11
																		26.9971	10.22
																		23.98	9.84
																		25.0084	10.17
																		29.0476	10.41
																		23.9792	10.56
																		28.134	10.34
																		23.99	9.71
																		25.0636	10.82
																		25.3092	10.69
																		26.9882	9.7
																		24.98	9.76
																		27.9501	10.52
																		24	10.56
																		23.0117	10.13
																		20.9724	9.63
																		26.0001	9.8
																		30.2417	10.37
																		24.0013	10.55
																		27.0633	10.01
																		26.98	9.63
																		27.0962	9.81
																		29.1448	10.32
																		28.0058	10.62
																		28.0186	10.9
																		23.0417	10.9
																		27.99	10.96
																		21.0519	10.88
																		30.0427	11.2
																		26.0001	10.85
																		25.018	10.18
																		22.0101	10.86
																		22.9988	10.61
																		26.0608	10.49
																		29.986	10.76
																		26.0668	10.85
																		21.0306	11.35
																		25.98	9.93
																		25.99	10.19
																		23.0001	10.8
																		21.0133	10.32
																		24.1082	10.85
																		28.9956	10.63
																		24.0408	10.57
																		25.9966	9.96
																		28.97	10.85
																		24.0296	10.8
																		28.0071	11.01
																		28.0151	10.79
																		29.0159	10.28
																		29.0066	10.86
																		28.0158	10.44
																		30.99	10.22
																		27.97	10.77
																		27	10.42
																		27.0977	10.5
																		24.0372	10.59
																		22.02	10.75
																		29.0266	10.41
																		28.0393	11.26
																		24.02	10.76
																		35.0451	9.32
																		38.0021	8.86
																		33.983	8.34
																		37.0332	8.49
																		44.0201	9.04
																		36.0522	8.66
																		39.9815	8.82
																		38.0311	8.96
																		37.99	8.57
																		40.0015	9.12
																		46.0209	9.59
																		50.011	9.58
																		47.06	8.75
																		45.0244	8.68
																		39.9604	9.6
																		46.0435	9.3
																		42.9814	9.16
																		48.018	9.67
																		47.0198	8.96
																		35.99	9.66
																		37.0224	9.73
																		38.0309	9.34
																		38.0156	9.54
																		37.98	9.44
																		37.01	9.82
																		38.0053	9.4
																		32.083	9.83
																		34.06	9.56
																		36.0649	9.33
																		38.0034	9.63
																		34.0172	9.91
																		33.1975	9.57
																		35.1	8.94
																		34.0047	9.47
																		34.0038	9.54
																		33	9.91
																		35.0876	9.95
																		35.0205	9.35
																		31.9986	9.81
																		34.0078	9.55
																		32.1004	8.91
																		29.2115	9.26
																		28.03	10.17
																		34.0394	10.09
																		36.1356	9.95
																		37.0462	10.65
																		30.2457	9.96
																		32.0543	10.02
																		30.1179	10.48
																		32.1621	10.06
																		31.2692	10.59
																		30.4089	10.48
																		32.0337	9.97
																		32.1517	10.19
																		33.1288	9.98
																		30.2794	10.2
																		30.1427	10.36
																		27.164	10.61
																		31.0284	10.02
																		28.1294	9.99
																		32.0279	10.33
																		29.0503	9.73
																		23.0877	10.06
																		27.0877	10.2
																		28.297	10.37
																		32.0765	10.38
																		29.0796	10.03
																		32.0179	9.71
																		35.0049	10.48
																		32.1123	9.6
																		26.1206	10.01
																		30.9903	9.89
																		25.198	11.14
																		30.1238	10.52
																		28.0093	10.2
																		29.0462	10.08
																		25.9901	9.98
																		30.027	10.21
																		33.01	10.74
																		31.0831	10.15
																		30.9703	9.83
																		30.9975	9.88
																		32.9852	10.4
																		27.0485	11.32
																		27.0633	11.04
																		31.0258	11.35
																		26.01	11.19
																		30.9946	11.23
																		21.0178	10.88
																		26.1492	10.63
																		21.1793	10.06
																		24.1173	10.97
																		23.1699	10.41
																		23.1734	10.3
																		22.209	10.79
																		24.0974	10.52
																		25.9892	11.12
																		29.1606	10.05
																		27.0601	10.27
																		24.167	11.07
																		26.0388	10.73
																		26.0922	10.71
																		22.0446	10.6
																		24.0832	11.05
																		24.2042	10.18
																		23.0449	11.2
																		25.1758	10.71
																		25.3133	10.83
																		24.9803	10.87
																		23.0859	10.5
																		25.0823	11.05
																		23.0677	10.72
																		21.0333	10.12
																		22.1188	10.97
																		22.1197	10.56
																		29.0617	10.44
																		25.0691	10.09
																		29.98	11
																		25	10.16
																		26.9701	10.96
																		26.0088	10.91
																		38.0463	9.47
																		37.0552	8.77
																		36.0333	8.65
																		38.0142	8.44
																		33.0348	9.15
																		36.002	8.54
																		35.98	9.17
																		34.1061	8.56
																		35.0337	8.47
																		34.0041	9.37
																		36.02	8.7
																		34.025	9.01
																		33.9941	9.28
																		32.0887	8.48
																		36.0423	9.45
																		35.027	8.14
																		36.0641	8.36
																		32.1511	8.17
																		32.1811	8.69
																		35.354	8.4
																		34.0078	8.56
																		35.0771	8.58
																		40.0351	8.26
																		34.1377	8.38
																		35.1218	8.74
																		39.09	8.3
																		39.066	9.43
																		35.115	9.81
																		35.0052	8.63
																		31.1369	8.59
																		35.0677	8.65
																		35.0203	8.96
																		38.1848	8.09
																		39.0303	8.48
																		39.0147	8.52
																		40.0415	8.98
																		37.0967	8.44
																		38.1074	8.74
																		38.1343	8.87
																		39.2175	8.26
																		37.0475	8.29
																		42.059	9.12
																		47.0502	8.84
																		35.2221	7.78
																		35.9859	8.81
																		33.1343	8.77
																		43.0703	8.84
																		40.0441	8.84
																		41.2349	9.06
																		39.0554	8.55
																		39.0261	8.7
																		40.99	8.81
																		39.2056	8.97
																		38.1969	7.86
																		39.3079	8.09
																		42.0878	8.76
																		39.1946	9.09
																		42.0809	8.89
																		41.1718	8.34
																		41.1089	8.51
																		37.2143	8.11
																		37.1163	8.3
																		44.9945	8.93
																		40.0899	8.77
																		38.0156	9.01
																		36.1124	8.35
																		40.1497	8.15
																		41.411	8.57
																		32.2528	9.07
																		37.2847	7.91
																		41.0661	8.07
																		38.1304	8.04
																		40.022	9.57
																		37.0149	8.83
																		41.1124	9.08
																		39.4369	8.62
																		42.0562	7.84
																		35.1175	8.43
																		40.1716	8.91
																		38.0159	8.78
																		39.3327	8.09
																		37.3508	8.48
																		33.4184	9.07
																		37.1379	9.59
																		42.3491	8.47
																		39.0861	9.22
																		42.2919	9.51
																		36.063	9.22
																		46.1719	9.73
																		43.3061	9.53
																		49.0562	9.71
																		46.1121	9.65
																		43.2174	9.49
																		46.272	9.34
																		38.3469	10.01
																		44.3775	9.85
																		43.2909	9.84
																		39.3218	9.49
																		40.4538	9.23
																		41.2056	10.55
																		42.2434	10.36
																		41.0882	10.18
																		41.1196	10.08
																		43.0201	9.82
																		46.043	9.45
																		38.086	10.55
																		39.0638	10.12
																		41.1303	10.75
																		29.0681	9.78
																		27.1584	10.89
																		22.0664	11.01
																		24.1156	10.8
																		26.0416	10.41
																		26.97	11.23
																		30.95	10.83
																		22.0527	10.77
																		29.1458	10.25
																		28.0436	10.47
																		22.055	10.49
																		24.0616	11.03
																		26.0204	11.32
																		37.4785	9
																		38.1843	8.31
																		40.0555	8.57
																		35.105	7.94
																		36.0833	8.9
																		39.0513	8.27
																		38.0536	8.96
																		40.1153	8.71
																		41.9631	8.2
																		44.0303	8.99
																		37.9602	8.29
																		38.99	8.88
																		40.0013	9.29
																		35.0494	8.61
																		38.0316	8.6
																		33.0288	7.92
																		39.0297	8.08
																		41.0278	8.57
																		39.1518	8.14
																		39.1206	8.44
																		39.2225	8.28
																		39.0746	8.41
																		35.2332	8.45
																		39.1916	8.16
																		41.0632	8.44
																		32.3676	8.18
																		33.3479	8.24
																		40.1268	8.42
																		35.1292	8.16
																		37.0191	7.8
																		37.074	8.42
																		38.1958	8.31
																		35.1435	8.45
																		36.4638	7.97
																		35.5103	8.11
																		34.3698	8.42
																		36.0583	8.93
																		38.1007	8.38
																		39.1229	8.15
																		35.1127	8.69
																		39.4225	7.55
																		37.1089	8.5
																		34.3401	7.83
																		37.0241	8.13
																		33.7291	7.95
																		35.1383	8.57
																		33.1354	7.99
																		39.7783	7.59
																		35.4892	9.11
																		35.4008	8.15
																		37.4652	8.26
																		34.5207	8.37
																		36.3315	8.12
																		37.6251	7.88
																		34.24	8.4
																		34.2662	8.2
																		37.4916	8.44
																		34.8953	8.2
																		35.911	8.63
																		35.4108	8.31
																		37.4588	8.13
																		38.0771	8.12
																		37.5228	8.28
																		35.4544	7.84
																		37.1214	8.2
																		36.1547	8.28
																		35.5452	8.1
																		35.2493	8.37
																		40.3262	8.56
																		40.1657	8.74
																		35.2592	8.14
																		37.4394	7.92
																		38.0074	8.93
																		39.2097	8.31
																		37.5027	8.25
																		40.019	8.49
																		38.6017	8.21
																		39.1909	7.77
																		36.2271	8.09
																		39.2943	7.86
																		35.3485	7.51
																		38.2845	7.68
																		40.2605	8.05
																		38.2879	8.05
																		35.5272	8.62
																		35.1275	8.9
																		32.2044	8.91
																		35.6677	8.64
																		31.4431	8.75
																		34.38	8.98
																		36.1285	8.6
																		35.4078	8.53
																		38.0647	8.77
																		36.8586	8.54
																		40.0063	8.5
																		34.9434	8.11
																		38.1057	8.77
																		38.6215	8.47
																		33.3766	8.83
																		40.6264	8.65
																		37.6989	8.67
																		39.7948	8.79
																		36.6484	8.42
																		39.5242	8.51
																		32.5871	8.47
																		40.6177	8.88
																		39.4634	8.51
																		38.3043	8.83
																		53.1472	8.17
																		35.1508	10.58
																		39.2956	9.59
																		39.3141	10.01
																		41.2604	10.02
																		39.0787	10.33
																		38.1413	10.05
																		39.0228	10.41
																		36.1231	9.88
																		31.9931	11.05
																		31.5032	10.41
																		27.1143	10.56
																		25.1917	11.35
																			9.35
																			8.42
																			8.31
																			8.63
																			8.82
																			8.93
																			9.09
																			8.82
																			8.69
																			9.48
																			7.89
																			9.06
																			9.15
																			8.45
																			9.4
																			8.07
																			9.06
																			8.8
																			8.87
																			8.7
																			8.7
																			9.01
																			9.11
																			9.07
																			8.32
																			9.57
																			9.01
																			8.71
																			8.73
																			8.47
																			8.5
																			8.83
																			8.92
																			8.75
																			8.74
																			8.81
																			8.95
																			9.25
																			8.5
																			9.12
																			8.82
																			8.44
																			9.03
																			8.52
																			8.78
																			8.84
																			8.81
																			8.96
																			8.96
																			8.32
																			8.24
																			8.67
																			8.26
																			8.64
																			8.46
																			8.33
																			8.61
																			8.88
																			8.9
																			8.95
																			8.52
																			8.8
																			8.91
																			8.94
																			8.58
																			8.84
																			8.82
																			8.45
																			8.46
																			8.51
																			8.05
																			8.86
																			8.25
																			8.99
																			8.75
																			8.96
																			8.94
																			8.48
																			8.57
																			8.76
																			8.67
																			7.82
																			8.78
																			8.88
																			9.08
																			9.09
																			9.07
																			9.21
																			8.22
																			9.55
																			9.02
																			9.06
																			8.94
																			9.03
																			9.25
																			9.11
																			9.11
																			9.41
																			8.37
																			8.83
																			8.88
																			9.19
																			8.02
																			9.02
																			8.79
																			8.92
																			9.04
																			8.81
																			9.16
																			9.08
																			8.77
																			9.42
																			9.29
																			8.28
																			9.25
																			8.75
																			8.72
																			9.04
																			10.69
																			9.79
																			10.25
