# Supplementary material for: Deciphering the actin structure-dependent preferential cooperative binding of cofilin
Source: eLife. 2024 Aug 2;13:RP95257. doi: 10.7554/eLife.95257 (PMC11296705; doi:10.7554/eLife.95257)
Supplement: Figure 8—figure supplement 1—source data 1. — These data are presented as origin plots in Figure 8—figure supplement 1A–B. [file elife-95257-fig8-figsupp1-data1.xlsx]

## Sheet: Figure 8-figure supplement 1
Figure 8-figure supplement 1A (F1)	Distance (nm)	ACF1	ACF2	ACF3	ACF4	ACF5	ACF6	ACF7	ACF8	ACF9	ACF10	ACF11	ACF12	ACF13	ACF14	ACF15	ACF16	ACF17	ACF18	ACF19	ACF20	ACF21	ACF22	ACF23	ACF24	ACF25	ACF26	ACF27	ACF28	ACF29	ACF30	ACF31	ACF32	ACF33	ACF34	ACF35	ACF36	ACF37	ACF38	ACF39	ACF40	ACF41	ACF42	ACF43	ACF44	ACF45	ACF46	ACF47	ACF48
	0	1.00003	1.0002	1.00009	1.00001	1.00004	1.00008	1.00006	1	1.00003	1.00003	1.00005	1.00002	1	1.00001	1.00008	1.00011	1	1.00002	1	1	1.00001	1.00003	1	1.00001	1.00002	1	1.00001	1.00001	1	1.00002	1	1.00001	1.00003	1.00014	1.00001	1.00005	1.00001	1.00005	1.00005	1.00015	1.00007	1.00001	1.00002	1.00004	1.00004	1.00004	1.00004	1.00004
	0.391389	0.998931	0.99667	0.998178	0.998785	0.998935	0.997223	0.998574	0.99922	0.996318	0.995007	0.997322	0.99753	0.998177	0.998332	0.997974	0.997	0.997805	0.998813	0.999093	0.998574	0.997738	0.9986	0.998473	0.998499	0.997959	0.999415	0.998081	0.997287	0.998607	0.99804	0.999178	0.996913	0.998204	0.997097	0.998776	0.997801	0.99827	0.996337	0.998375	0.996714	0.997282	0.998712	0.998459	0.997748	0.997748	0.997748	0.997748	0.997748
	0.782779	0.995755	0.988298	0.993454	0.996157	0.995794	0.99174	0.994661	0.997468	0.989982	0.988065	0.991903	0.993072	0.994783	0.994858	0.99324	0.990035	0.993632	0.996093	0.99697	0.995315	0.993843	0.995422	0.995622	0.994577	0.993915	0.997966	0.994824	0.992657	0.995207	0.993415	0.996868	0.991087	0.994309	0.990083	0.995454	0.991691	0.994044	0.989561	0.994271	0.988304	0.989995	0.99532	0.99435	0.9932	0.9932	0.9932	0.9932	0.9932
	1.17417	0.990645	0.976328	0.986513	0.9925	0.990843	0.984679	0.988618	0.994915	0.982455	0.981429	0.984779	0.987559	0.990457	0.990181	0.986583	0.980252	0.988223	0.992175	0.993804	0.990506	0.989117	0.990879	0.991888	0.988587	0.988595	0.995805	0.990907	0.987127	0.990236	0.986696	0.993142	0.983544	0.988939	0.980227	0.990237	0.982426	0.987783	0.981082	0.988204	0.975986	0.979033	0.990095	0.988049	0.987113	0.987113	0.987113	0.987113	0.987113
	1.56556	0.983705	0.96072	0.977339	0.987517	0.984261	0.975132	0.980483	0.991348	0.972029	0.971924	0.975113	0.979965	0.98453	0.983967	0.977763	0.967304	0.980816	0.986808	0.989372	0.983742	0.982541	0.984686	0.986628	0.980566	0.981397	0.9929	0.985372	0.979349	0.983692	0.977665	0.987975	0.973035	0.981664	0.967398	0.983093	0.970467	0.979387	0.969345	0.980025	0.959756	0.964717	0.983007	0.979649	0.978756	0.978756	0.978756	0.978756	0.978756
	1.95695	0.975074	0.942699	0.966546	0.98161	0.976258	0.964247	0.970565	0.986974	0.960333	0.962106	0.963998	0.971317	0.977736	0.976859	0.967516	0.952273	0.972248	0.980336	0.983877	0.975366	0.975065	0.977286	0.980399	0.970882	0.973122	0.98941	0.979014	0.970457	0.975993	0.966922	0.981451	0.960732	0.973111	0.952697	0.974219	0.956443	0.969326	0.955858	0.970201	0.940693	0.947869	0.974327	0.969525	0.968955	0.968955	0.968955	0.968955	0.968955
	2.34834	0.964867	0.922537	0.954305	0.974672	0.967013	0.951661	0.958969	0.981692	0.946568	0.950379	0.951194	0.961143	0.969769	0.968766	0.95589	0.935191	0.962176	0.972669	0.977223	0.965202	0.966197	0.968595	0.972907	0.959674	0.963539	0.985355	0.971348	0.959831	0.967236	0.954485	0.973585	0.946074	0.963134	0.936289	0.963652	0.940826	0.957647	0.939938	0.958756	0.919068	0.928937	0.964107	0.957852	0.957419	0.957419	0.957419	0.957419	0.957419
	2.73973	0.953206	0.900987	0.940971	0.966911	0.956696	0.937941	0.945909	0.975613	0.931439	0.937733	0.937179	0.949906	0.961006	0.96007	0.943245	0.91671	0.951004	0.963979	0.969504	0.953399	0.956373	0.958865	0.964415	0.947228	0.953057	0.980847	0.962711	0.947882	0.957699	0.940714	0.964443	0.929585	0.95206	0.918854	0.951518	0.924118	0.944643	0.922209	0.945956	0.89557	0.908501	0.952533	0.944929	0.944552	0.944552	0.944552	0.944552	0.944552
	3.13111	0.940189	0.878464	0.92677	0.958399	0.945439	0.923233	0.931511	0.968759	0.91503	0.924156	0.922189	0.937674	0.951507	0.950904	0.929793	0.897169	0.9388	0.954319	0.960743	0.940005	0.945633	0.948194	0.954974	0.933747	0.941781	0.975951	0.953106	0.934696	0.947539	0.92581	0.954079	0.911384	0.940001	0.90074	0.937903	0.906685	0.930475	0.90282	0.931941	0.870591	0.886954	0.939719	0.930971	0.930479	0.930479	0.930479	0.930479	0.930479
	3.52251	0.925898	0.855127	0.911741	0.949166	0.933322	0.907548	0.915856	0.961157	0.897223	0.909321	0.906144	0.9244	0.941308	0.941371	0.915515	0.876765	0.925559	0.943699	0.950942	0.925015	0.933954	0.936641	0.944601	0.919403	0.929729	0.970721	0.942475	0.92011	0.93686	0.909878	0.942545	0.891447	0.926989	0.882109	0.922859	0.88876	0.915236	0.881638	0.91676	0.844308	0.864491	0.925748	0.916155	0.915224	0.915224	0.915224	0.915224	0.915224
	3.91389	0.9104	0.831262	0.896009	0.939368	0.920392	0.891263	0.899035	0.952906	0.878556	0.894094	0.889409	0.910432	0.930672	0.931696	0.900584	0.85592	0.911558	0.932232	0.940192	0.9086	0.921676	0.924389	0.933553	0.9044	0.917146	0.965235	0.931105	0.904558	0.925803	0.893164	0.929919	0.870264	0.913249	0.86326	0.906479	0.870492	0.899103	0.859209	0.900563	0.816992	0.841281	0.910743	0.900675	0.899125	0.899125	0.899125	0.899125	0.899125
	4.30528	0.893738	0.806632	0.879432	0.928952	0.906646	0.874121	0.881026	0.944001	0.858566	0.877658	0.871694	0.895504	0.919467	0.921811	0.884807	0.834582	0.896602	0.919848	0.92846	0.890716	0.908581	0.9114	0.921756	0.888829	0.903842	0.95951	0.918787	0.887707	0.914345	0.875639	0.916252	0.847616	0.898667	0.844012	0.888778	0.851854	0.882049	0.835127	0.88328	0.788469	0.81722	0.894724	0.884614	0.882049	0.882049	0.882049	0.882049	0.882049
	4.69667	0.875954	0.781296	0.862004	0.918061	0.892065	0.856444	0.861865	0.934559	0.837746	0.860878	0.853213	0.879938	0.907963	0.91191	0.868227	0.813092	0.880949	0.906643	0.91584	0.871536	0.895021	0.897845	0.909493	0.872864	0.890014	0.953615	0.905828	0.869934	0.902563	0.857491	0.901631	0.823995	0.883429	0.824484	0.869831	0.832805	0.864199	0.809864	0.865005	0.758806	0.792277	0.877787	0.868122	0.864318	0.864318	0.864318	0.864318	0.864318
	5.08806	0.857086	0.754996	0.843617	0.906669	0.876616	0.83804	0.841513	0.924592	0.815783	0.843244	0.833829	0.863551	0.896062	0.901912	0.850728	0.791435	0.864452	0.892568	0.902327	0.851075	0.880857	0.883712	0.896758	0.856595	0.875496	0.947563	0.892105	0.851093	0.890414	0.838716	0.88612	0.799327	0.867455	0.804459	0.849668	0.813213	0.845528	0.783208	0.845695	0.727793	0.766307	0.859954	0.851273	0.845884	0.845884	0.845884	0.845884	0.845884
	5.47945	0.837184	0.727671	0.82423	0.894856	0.860276	0.819037	0.819981	0.914191	0.792849	0.825065	0.81355	0.84647	0.88392	0.891916	0.832272	0.769834	0.847225	0.877661	0.887976	0.829436	0.86627	0.869114	0.883736	0.840173	0.860347	0.941404	0.877774	0.831292	0.877924	0.81943	0.869805	0.773889	0.850828	0.783923	0.828347	0.79299	0.826107	0.755315	0.825393	0.695392	0.739249	0.841298	0.834196	0.826931	0.826931	0.826931	0.826931	0.826931
	5.87084	0.81631	0.699328	0.803906	0.882682	0.843044	0.799499	0.797286	0.903412	0.769021	0.806469	0.792536	0.828746	0.871587	0.881947	0.812946	0.748493	0.829305	0.861956	0.872838	0.806728	0.851334	0.854138	0.870555	0.823747	0.844571	0.935175	0.862906	0.810679	0.86511	0.799756	0.852773	0.747899	0.833606	0.762864	0.805946	0.772082	0.806	0.726357	0.804171	0.661616	0.711136	0.82189	0.817024	0.807609	0.807609	0.807609	0.807609	0.807609
	6.26223	0.794546	0.669961	0.782679	0.870175	0.824944	0.779402	0.773458	0.892308	0.744176	0.787206	0.770729	0.81032	0.859097	0.872026	0.792745	0.727584	0.810674	0.845453	0.85693	0.782989	0.836046	0.838854	0.857285	0.807478	0.828127	0.928916	0.847487	0.789144	0.851996	0.779784	0.835107	0.721425	0.815798	0.741263	0.782527	0.750493	0.785268	0.696238	0.782075	0.626475	0.682039	0.801802	0.799906	0.787984	0.787984	0.787984	0.787984	0.787984
	6.65362	0.771997	0.639871	0.760762	0.857471	0.806039	0.759035	0.748596	0.880971	0.718691	0.767847	0.748474	0.791432	0.846641	0.862296	0.771895	0.707514	0.791538	0.828253	0.840339	0.758382	0.820653	0.823438	0.844149	0.791585	0.811185	0.922693	0.831735	0.766999	0.838686	0.75976	0.816911	0.694896	0.797583	0.71936	0.758208	0.728331	0.764077	0.66538	0.759284	0.590245	0.652213	0.781164	0.783053	0.768363	0.768363	0.768363	0.768363	0.768363
	7.04501	0.748779	0.60921	0.738299	0.844592	0.786408	0.738363	0.722776	0.86943	0.692381	0.747962	0.725814	0.771977	0.8342	0.852763	0.750488	0.688475	0.771852	0.810364	0.82308	0.732938	0.805079	0.807963	0.831164	0.776252	0.7937	0.916547	0.815571	0.744113	0.825238	0.739805	0.798274	0.668328	0.778974	0.697237	0.733073	0.705742	0.742524	0.633667	0.735891	0.553079	0.621895	0.760066	0.766649	0.748792	0.748792	0.748792	0.748792	0.748792
	7.4364	0.725026	0.578396	0.715521	0.831687	0.766156	0.717731	0.696145	0.857786	0.665645	0.728112	0.703052	0.752216	0.82201	0.843619	0.728733	0.670922	0.751872	0.791902	0.805239	0.706809	0.789598	0.79263	0.818555	0.761727	0.775897	0.910555	0.799226	0.720745	0.811806	0.720196	0.779305	0.642163	0.760179	0.67525	0.707251	0.682957	0.72082	0.601493	0.712106	0.515359	0.591436	0.738665	0.750941	0.729599	0.729599	0.729599	0.729599	0.729599
	7.82779	0.700875	0.547705	0.69262	0.81881	0.745389	0.697206	0.668817	0.846072	0.638455	0.7081	0.680387	0.732134	0.810086	0.834901	0.706787	0.655083	0.73163	0.772912	0.786853	0.680071	0.774191	0.777543	0.806365	0.748202	0.757809	0.904766	0.782682	0.696913	0.798488	0.701108	0.760102	0.616523	0.74127	0.653598	0.680847	0.660203	0.699113	0.568916	0.688074	0.477347	0.561146	0.717075	0.73613	0.710898	0.710898	0.710898	0.710898	0.710898
	8.21918	0.676466	0.517453	0.669725	0.806065	0.724209	0.677026	0.640933	0.834366	0.611002	0.688132	0.657934	0.711868	0.798595	0.826755	0.684728	0.641275	0.711313	0.753476	0.767984	0.652827	0.75902	0.762861	0.794735	0.735885	0.73959	0.899245	0.766073	0.672694	0.78542	0.68275	0.740771	0.591708	0.72239	0.632568	0.653969	0.637718	0.677592	0.536103	0.663959	0.439331	0.531303	0.695437	0.72243	0.692918	0.692918	0.692918	0.692918	0.692918
	8.61057	0.651933	0.487929	0.646983	0.793543	0.702701	0.657379	0.612617	0.822721	0.583472	0.668401	0.635955	0.691531	0.787623	0.819256	0.662695	0.629706	0.691064	0.733674	0.748699	0.625207	0.744182	0.748717	0.783768	0.724942	0.721358	0.894039	0.749498	0.648275	0.772714	0.665315	0.721419	0.567987	0.70367	0.612405	0.626731	0.615703	0.656431	0.503305	0.639929	0.401564	0.502159	0.673873	0.710015	0.675856	0.675856	0.675856	0.675856	0.675856
	9.00196	0.627405	0.459247	0.62441	0.781282	0.680929	0.638334	0.583968	0.811181	0.555809	0.648731	0.614425	0.671104	0.777215	0.812445	0.640652	0.62045	0.670957	0.713538	0.729034	0.597275	0.729685	0.735193	0.773501	0.715485	0.703146	0.889184	0.732973	0.623587	0.76044	0.648903	0.702145	0.545483	0.685157	0.593224	0.599211	0.594298	0.635756	0.470475	0.616077	0.364137	0.473836	0.65248	0.699009	0.659802	0.659802	0.659802	0.659802	0.659802
	9.39335	0.603008	0.431608	0.602069	0.769379	0.658937	0.620131	0.555095	0.799817	0.528303	0.629549	0.593533	0.650767	0.767501	0.806397	0.61866	0.613606	0.651202	0.693161	0.70907	0.569185	0.715699	0.722419	0.764065	0.707607	0.685102	0.884714	0.716677	0.598872	0.748683	0.633662	0.683056	0.524536	0.666992	0.575211	0.571508	0.573602	0.615727	0.437926	0.592555	0.327197	0.44646	0.631371	0.689511	0.644975	0.644975	0.644975	0.644975	0.644975
	9.78474	0.578855	0.404989	0.579956	0.757831	0.636748	0.602732	0.526063	0.788647	0.500794	0.610541	0.573276	0.630421	0.75843	0.801053	0.596683	0.60901	0.631804	0.672551	0.688836	0.540999	0.702141	0.710417	0.755427	0.701311	0.667179	0.880632	0.700572	0.574058	0.737447	0.619596	0.664244	0.505157	0.649162	0.558331	0.543687	0.553628	0.596417	0.405562	0.569423	0.290691	0.420046	0.610603	0.681534	0.631368	0.631368	0.631368	0.631368	0.631368
	10.1761	0.555067	0.379488	0.558096	0.746704	0.614374	0.586329	0.496966	0.777738	0.473501	0.592067	0.553724	0.610208	0.750105	0.796444	0.574723	0.606587	0.612961	0.651784	0.668408	0.512855	0.689153	0.699275	0.747683	0.696587	0.649486	0.876951	0.684827	0.549303	0.726764	0.606765	0.645812	0.487618	0.631765	0.542655	0.515828	0.534365	0.577946	0.373605	0.546801	0.254647	0.394628	0.59026	0.675077	0.619134	0.619134	0.619134	0.619134	0.619134
	10.5675	0.531761	0.355095	0.536564	0.73599	0.591827	0.57089	0.467878	0.767105	0.446354	0.573971	0.535011	0.59007	0.742448	0.792462	0.552835	0.606033	0.594695	0.630888	0.647828	0.484847	0.676661	0.688989	0.740788	0.693347	0.631985	0.873651	0.669435	0.524648	0.716602	0.595124	0.627847	0.471908	0.614792	0.528097	0.488001	0.51575	0.560366	0.342083	0.524769	0.219011	0.370222	0.570386	0.67006	0.608243	0.608243	0.608243	0.608243	0.608243
	10.9589	0.509065	0.331857	0.515427	0.725705	0.56912	0.556501	0.438902	0.756789	0.419405	0.556333	0.517157	0.570042	0.735485	0.789069	0.531028	0.607096	0.577133	0.609915	0.627151	0.457077	0.664708	0.679587	0.734749	0.691485	0.614712	0.870719	0.654486	0.500117	0.706947	0.584633	0.610439	0.458118	0.598276	0.514623	0.460272	0.497721	0.543752	0.311065	0.503421	0.183765	0.346856	0.551038	0.666389	0.598721	0.598721	0.598721	0.598721	0.598721
	11.3503	0.487114	0.309878	0.494855	0.715864	0.546284	0.543213	0.410169	0.746813	0.392761	0.539282	0.500402	0.550171	0.729169	0.786171	0.509442	0.609452	0.560373	0.588934	0.606446	0.429679	0.653293	0.67107	0.729541	0.690855	0.597702	0.868132	0.64005	0.475875	0.697771	0.575239	0.593672	0.446254	0.582253	0.50219	0.432725	0.480217	0.52817	0.280758	0.482885	0.148962	0.324616	0.532268	0.663929	0.59056	0.59056	0.59056	0.59056	0.59056
	11.7417	0.466052	0.289212	0.474988	0.70644	0.523359	0.531009	0.381828	0.73719	0.36634	0.522634	0.484814	0.530404	0.723436	0.78367	0.488142	0.612741	0.544469	0.567985	0.585752	0.402731	0.642346	0.663404	0.725081	0.691289	0.580942	0.865857	0.626126	0.451872	0.689036	0.566828	0.577619	0.436199	0.566707	0.49071	0.405425	0.463191	0.513661	0.251151	0.463247	0.11462	0.30357	0.514114	0.662521	0.583659	0.583659	0.583659	0.583659	0.583659
	12.1331	0.446031	0.270057	0.456017	0.697465	0.500406	0.520017	0.354095	0.72795	0.340371	0.506694	0.470592	0.510867	0.718289	0.781519	0.467265	0.616701	0.529586	0.547173	0.565152	0.37639	0.631931	0.656598	0.721356	0.692624	0.564538	0.863873	0.612837	0.42831	0.680741	0.559347	0.562354	0.427953	0.551713	0.480208	0.378461	0.446634	0.500308	0.222562	0.444658	0.0809012	0.283856	0.496641	0.662013	0.57802	0.57802	0.57802	0.57802	0.57802
	12.5245	0.427209	0.25249	0.43811	0.688895	0.477493	0.51017	0.327209	0.719083	0.314761	0.491204	0.457871	0.491494	0.71361	0.779601	0.446916	0.620972	0.515743	0.526551	0.544687	0.350745	0.621927	0.650584	0.718229	0.694667	0.548475	0.86214	0.600137	0.405169	0.67285	0.552654	0.547936	0.421252	0.537246	0.4706	0.351903	0.430544	0.488135	0.195047	0.427205	0.0479062	0.265564	0.479882	0.662225	0.573475	0.573475	0.573475	0.573475	0.573475
	12.9159	0.409743	0.2367	0.421385	0.680751	0.454698	0.501598	0.30149	0.710618	0.289715	0.476424	0.446695	0.472409	0.709417	0.777901	0.427153	0.625365	0.503116	0.506231	0.524439	0.325953	0.612396	0.64535	0.715668	0.697263	0.532882	0.860638	0.58814	0.38259	0.665376	0.546674	0.534421	0.416032	0.52338	0.461935	0.325833	0.414961	0.477217	0.168973	0.411014	0.0160371	0.2488	0.463901	0.663007	0.569988	0.569988	0.569988	0.569988	0.569988
	13.3072	0.393785	0.222751	0.405961	0.672998	0.432098	0.494247	0.277304	0.702538	0.265238	0.462226	0.437181	0.453603	0.705596	0.776325	0.408065	0.629602	0.491732	0.486296	0.504467	0.30215	0.60324	0.64082	0.713539	0.700233	0.517782	0.859327	0.576817	0.360655	0.658298	0.541278	0.521851	0.411998	0.51011	0.454161	0.300323	0.399915	0.467572	0.144652	0.39616	0.0162485	0.233617	0.448734	0.664188	0.567391	0.567391	0.567391	0.567391	0.567391
	13.6986	0.379472	0.210715	0.391859	0.665619	0.409764	0.488167	0.255111	0.694856	0.241407	0.448651	0.42923	0.43513	0.70213	0.774852	0.389626	0.633526	0.481707	0.466846	0.484841	0.279489	0.594454	0.636941	0.711761	0.703429	0.503261	0.858179	0.566215	0.33941	0.651616	0.536346	0.510259	0.408983	0.497468	0.44728	0.275438	0.385446	0.459234	0.122625	0.382701	0.0461635	0.220011	0.434427	0.665621	0.565576	0.565576	0.565576	0.565576	0.565576
	14.09	0.366924	0.200595	0.379115	0.658594	0.387762	0.483344	0.235445	0.687565	0.218353	0.435787	0.422847	0.417059	0.698949	0.773426	0.371871	0.636967	0.473094	0.447992	0.465642	0.258171	0.586006	0.633639	0.710238	0.706703	0.48939	0.857158	0.556354	0.319031	0.645317	0.531768	0.499668	0.406752	0.485479	0.441259	0.251252	0.371579	0.452209	0.10379	0.370679	0.0752474	0.207945	0.421017	0.667157	0.564413	0.564413	0.564413	0.564413	0.564413
	14.4814	0.35623	0.19229	0.367718	0.651865	0.366146	0.479712	0.218914	0.680653	0.196032	0.423451	0.417909	0.399366	0.695973	0.771991	0.354769	0.639753	0.465909	0.42982	0.446934	0.238373	0.577808	0.630812	0.708841	0.709911	0.476186	0.856222	0.5472	0.299518	0.639367	0.527382	0.490086	0.405047	0.474116	0.436007	0.227824	0.358311	0.446473	0.0893351	0.360065	0.103329	0.197283	0.408523	0.668646	0.563722	0.563722	0.563722	0.563722	0.563722
	14.8728	0.347449	0.185712	0.357658	0.645417	0.344969	0.477281	0.206171	0.674127	0.174649	0.411854	0.4143	0.382167	0.693176	0.770519	0.338315	0.64179	0.460212	0.412463	0.428815	0.220359	0.569881	0.62839	0.707514	0.712931	0.46374	0.855334	0.538812	0.281081	0.633742	0.523083	0.481516	0.403726	0.463416	0.431477	0.205236	0.345622	0.44201	0.0809728	0.350847	0.130381	0.18788	0.396978	0.669951	0.563414	0.563414	0.563414	0.563414	0.563414
	15.2642	0.340597	0.180617	0.348961	0.639171	0.324279	0.475896	0.197793	0.667963	0.154152	0.400738	0.411961	0.36541	0.690434	0.768915	0.322545	0.642889	0.455927	0.396009	0.411355	0.204361	0.562093	0.626242	0.706114	0.715626	0.452023	0.854444	0.531109	0.263762	0.628375	0.518696	0.473943	0.402498	0.453321	0.427493	0.183573	0.333455	0.438744	0.0797399	0.342929	0.156506	0.179511	0.386385	0.670922	0.563278	0.563278	0.563278	0.563278	0.563278
	15.6556	0.335656	0.176828	0.341633	0.633097	0.304134	0.475548	0.194184	0.662168	0.134776	0.39027	0.41073	0.349202	0.687731	0.767155	0.307468	0.642983	0.453079	0.380598	0.394662	0.190682	0.554469	0.624293	0.704594	0.717893	0.441105	0.853512	0.52414	0.247746	0.62322	0.514108	0.467351	0.40128	0.443853	0.42396	0.16296	0.321748	0.436627	0.085417	0.336233	0.181756	0.171957	0.376767	0.671433	0.563234	0.563234	0.563234	0.563234	0.563234
	16.047	0.332562	0.174051	0.335733	0.627129	0.284606	0.476067	0.195404	0.656721	0.116634	0.380295	0.41059	0.333535	0.684949	0.765141	0.293189	0.641918	0.451545	0.366342	0.378828	0.179588	0.546902	0.622419	0.702845	0.719616	0.430961	0.852487	0.517834	0.233178	0.618201	0.509174	0.461707	0.399837	0.434965	0.420686	0.143574	0.310416	0.435557	0.0961551	0.330634	0.206202	0.164981	0.368125	0.671347	0.563109	0.563109	0.563109	0.563109	0.563109
	16.4384	0.331218	0.172059	0.331279	0.621217	0.265786	0.477387	0.201165	0.651623	0.100044	0.370809	0.41141	0.318472	0.682054	0.762832	0.279767	0.639636	0.451279	0.353375	0.36396	0.171321	0.539376	0.620537	0.700805	0.720712	0.42162	0.851328	0.512191	0.220196	0.613256	0.503781	0.456978	0.398088	0.426652	0.417533	0.125669	0.299387	0.435453	0.110159	0.326001	0.229901	0.158357	0.360474	0.670556	0.562807	0.562807	0.562807	0.562807	0.562807
	16.8298	0.331496	0.170607	0.328282	0.615327	0.247796	0.47939	0.210867	0.646863	0.0855026	0.361848	0.413123	0.304091	0.678977	0.760169	0.267305	0.636082	0.452163	0.341836	0.350181	0.166049	0.531861	0.618565	0.698423	0.721113	0.413096	0.849998	0.507187	0.209039	0.608329	0.497848	0.453124	0.395916	0.418911	0.414364	0.109643	0.288604	0.43622	0.125922	0.322211	0.252829	0.151908	0.353829	0.668965	0.562236	0.562236	0.562236	0.562236	0.562236
	17.2211	0.333246	0.169479	0.326721	0.609401	0.230785	0.481955	0.223772	0.642433	0.0736663	0.353243	0.415648	0.290418	0.675659	0.7571	0.255888	0.631223	0.454073	0.33184	0.337596	0.163782	0.524292	0.616417	0.695621	0.720767	0.40538	0.848462	0.502764	0.199798	0.603363	0.491285	0.4501	0.393221	0.411719	0.411043	0.0960599	0.278031	0.437761	0.142642	0.319114	0.274998	0.145466	0.348201	0.666502	0.56129	0.56129	0.56129	0.56129	0.56129
	17.6125	0.336309	0.168538	0.3265	0.603434	0.214942	0.485042	0.239126	0.638336	0.0655794	0.345163	0.418819	0.277605	0.672099	0.753626	0.245549	0.625133	0.456925	0.323529	0.326342	0.164419	0.516713	0.614062	0.692401	0.719666	0.39853	0.8467	0.498943	0.192718	0.598338	0.484083	0.447864	0.39001	0.405118	0.407527	0.0857043	0.267676	0.440003	0.159757	0.316604	0.296313	0.138947	0.343619	0.663132	0.559962	0.559962	0.559962	0.559962	0.559962
	18.0039	0.340517	0.167632	0.327515	0.597381	0.200482	0.488509	0.25625	0.634558	0.0620278	0.337396	0.422563	0.265676	0.668231	0.749709	0.23634	0.617841	0.460551	0.316983	0.316523	0.167672	0.509051	0.611433	0.688694	0.717809	0.392521	0.844691	0.495636	0.187825	0.593221	0.476202	0.446368	0.386185	0.399093	0.40373	0.0794409	0.25757	0.442853	0.176958	0.314543	0.316731	0.132274	0.340095	0.658833	0.558168	0.558168	0.558168	0.558168	0.558168
	18.3953	0.345712	0.166739	0.329596	0.591249	0.187651	0.492366	0.274587	0.631108	0.0633379	0.330102	0.426673	0.254803	0.6641	0.745393	0.228226	0.609511	0.464893	0.312297	0.308263	0.173211	0.501375	0.608531	0.684524	0.715242	0.387424	0.842432	0.492875	0.185234	0.588023	0.467675	0.445572	0.381829	0.393706	0.399682	0.0778958	0.247793	0.446265	0.194108	0.312843	0.33616	0.12543	0.337662	0.653632	0.555947	0.555947	0.555947	0.555947	0.555947
	18.7867	0.351739	0.165794	0.332587	0.585022	0.176712	0.496503	0.293681	0.627974	0.0686163	0.323167	0.43104	0.245042	0.659673	0.740678	0.221197	0.60026	0.46979	0.3095	0.301651	0.18062	0.493655	0.605325	0.679864	0.712017	0.383224	0.839918	0.49059	0.184877	0.582744	0.458523	0.445433	0.376896	0.388966	0.395368	0.0810107	0.238439	0.450165	0.211027	0.3114	0.354533	0.118409	0.336331	0.64756	0.553273	0.553273	0.553273	0.553273	0.553273
	19.1781	0.358461	0.164842	0.336336	0.578702	0.16792	0.500919	0.313192	0.625163	0.0766982	0.316619	0.435515	0.236522	0.654996	0.735618	0.215215	0.590272	0.475182	0.3086	0.296764	0.189537	0.485936	0.601824	0.674732	0.708217	0.379959	0.837156	0.488783	0.186656	0.577405	0.448787	0.445915	0.371474	0.384924	0.390835	0.0880335	0.229634	0.454514	0.227755	0.31013	0.371823	0.111206	0.336123	0.640681	0.550185	0.550185	0.550185	0.550185	0.550185
	19.5695	0.365752	0.163894	0.3407	0.572302	0.161496	0.505564	0.332844	0.622671	0.086329	0.310507	0.43996	0.229331	0.650089	0.730251	0.210235	0.579734	0.480954	0.309556	0.293653	0.199614	0.478253	0.598038	0.669157	0.703933	0.377633	0.834154	0.487431	0.190416	0.572029	0.438532	0.446982	0.365608	0.381618	0.386119	0.0979226	0.221508	0.459265	0.244172	0.308965	0.387982	0.10383	0.337037	0.633065	0.546727	0.546727	0.546727	0.546727	0.546727
	19.9609	0.373498	0.162994	0.3456	0.565813	0.157587	0.510386	0.352437	0.620496	0.0967837	0.304711	0.444327	0.223512	0.644974	0.724611	0.206264	0.568805	0.487021	0.312281	0.292322	0.210567	0.470608	0.593969	0.663144	0.699261	0.376225	0.830921	0.486493	0.19589	0.566626	0.427791	0.448604	0.359345	0.379063	0.381224	0.109752	0.214193	0.464369	0.260351	0.307827	0.403048	0.0962463	0.339067	0.62479	0.542916	0.542916	0.542916	0.542916	0.542916
	20.3523	0.381602	0.162192	0.350946	0.559267	0.156229	0.51538	0.371807	0.618644	0.107497	0.29939	0.448494	0.219147	0.639718	0.718759	0.203269	0.557701	0.493321	0.316671	0.292759	0.222178	0.463088	0.589658	0.656766	0.69431	0.375745	0.827475	0.48599	0.202898	0.561224	0.416646	0.450756	0.35281	0.37731	0.376193	0.122853	0.207816	0.469788	0.276245	0.306673	0.417011	0.0884373	0.342194	0.615949	0.538844	0.538844	0.538844	0.538844	0.538844
	20.7436	0.389975	0.161483	0.356707	0.552657	0.157331	0.520443	0.390824	0.617102	0.118165	0.294364	0.452472	0.21618	0.634321	0.712703	0.201269	0.546552	0.499739	0.322565	0.294892	0.23425	0.455671	0.58511	0.650033	0.689175	0.376117	0.823825	0.485852	0.211118	0.555822	0.405133	0.45341	0.346018	0.37634	0.37098	0.136773	0.202485	0.475455	0.291866	0.305437	0.429921	0.0803511	0.346374	0.606621	0.534523	0.534523	0.534523	0.534523	0.534523
	21.135	0.398539	0.160909	0.362836	0.546016	0.160683	0.525578	0.409379	0.615877	0.128611	0.289781	0.456197	0.214633	0.628867	0.7065	0.200244	0.535566	0.506246	0.329817	0.298642	0.246663	0.448453	0.58038	0.643029	0.683963	0.377331	0.819992	0.486116	0.220383	0.550438	0.393333	0.456547	0.339123	0.376186	0.3656	0.151231	0.198291	0.481326	0.307244	0.304098	0.441788	0.0719544	0.351564	0.596909	0.530054	0.530054	0.530054	0.530054	0.530054
	21.5264	0.407225	0.160419	0.369289	0.539357	0.165989	0.53067	0.42737	0.614954	0.138638	0.28553	0.459658	0.214375	0.623362	0.700153	0.200153	0.524881	0.51272	0.338237	0.303879	0.259289	0.441432	0.575495	0.635796	0.678767	0.379287	0.815993	0.486721	0.230424	0.545072	0.381314	0.460147	0.332153	0.376813	0.359997	0.166035	0.195291	0.487323	0.322303	0.302622	0.452608	0.0632322	0.357688	0.586904	0.525477	0.525477	0.525477	0.525477	0.525477
	21.9178	0.415975	0.160017	0.376022	0.532708	0.172908	0.535694	0.444713	0.614332	0.148231	0.281641	0.462849	0.215335	0.617877	0.6937	0.200949	0.514671	0.519127	0.347662	0.310472	0.272063	0.434673	0.570515	0.628403	0.673684	0.381937	0.81185	0.487679	0.241081	0.539733	0.369153	0.464194	0.325229	0.378216	0.354156	0.181068	0.19352	0.493384	0.337108	0.301004	0.462377	0.0541896	0.364676	0.576716	0.520872	0.520872	0.520872	0.520872	0.520872
	22.3092	0.42474	0.159643	0.382952	0.526108	0.181094	0.540573	0.461317	0.613997	0.157221	0.278143	0.465701	0.217354	0.612455	0.687162	0.20251	0.505108	0.525376	0.357914	0.318271	0.284908	0.428222	0.565504	0.620931	0.668807	0.38519	0.807589	0.48897	0.252184	0.534439	0.356966	0.468669	0.31843	0.380363	0.348067	0.196243	0.192968	0.499434	0.351548	0.29926	0.471016	0.0448985	0.372435	0.566461	0.516327	0.516327	0.516327	0.516327	0.516327
	22.7006	0.433477	0.159265	0.390016	0.519583	0.190228	0.545241	0.477112	0.613935	0.165626	0.274933	0.468226	0.22027	0.60714	0.680561	0.204741	0.49633	0.531404	0.36883	0.327118	0.297776	0.422099	0.560523	0.613429	0.664224	0.38896	0.803239	0.490564	0.263565	0.529204	0.344842	0.473556	0.311816	0.383206	0.341717	0.211504	0.193602	0.505401	0.365657	0.297406	0.478483	0.0354622	0.380874	0.556265	0.511896	0.511896	0.511896	0.511896	0.511896
	23.092	0.442156	0.158855	0.397119	0.513195	0.20003	0.549686	0.492028	0.614133	0.173331	0.272145	0.470332	0.223944	0.602014	0.673949	0.207496	0.488524	0.53717	0.380267	0.336867	0.310629	0.416394	0.555669	0.606003	0.660027	0.393188	0.798836	0.49248	0.275149	0.524068	0.332928	0.478839	0.305511	0.386721	0.335166	0.226807	0.195351	0.511226	0.379361	0.295499	0.484667	0.026099	0.389899	0.546271	0.507701	0.507701	0.507701	0.507701	0.507701
	23.4834	0.450754	0.158364	0.40419	0.506971	0.210264	0.553824	0.506008	0.614565	0.180313	0.269623	0.472006	0.228167	0.597104	0.667341	0.210659	0.481789	0.542594	0.392075	0.347361	0.323421	0.411098	0.551009	0.598695	0.656289	0.397767	0.794412	0.49466	0.28677	0.51906	0.321338	0.484499	0.299529	0.390833	0.328435	0.242117	0.198119	0.516839	0.392626	0.29358	0.489499	0.0172623	0.399409	0.53662	0.503783	0.503783	0.503783	0.503783	0.503783
	23.8748	0.459256	0.157807	0.411171	0.500976	0.220741	0.557683	0.519012	0.615218	0.186553	0.267499	0.473199	0.232832	0.592511	0.660807	0.214136	0.476274	0.547674	0.40415	0.358469	0.336137	0.406303	0.546651	0.591603	0.653092	0.402666	0.790011	0.497136	0.298404	0.514238	0.310216	0.490518	0.293993	0.395516	0.32163	0.257411	0.201799	0.522203	0.405452	0.291731	0.492902	0.0105298	0.409317	0.527468	0.500258	0.500258	0.500258	0.500258	0.500258
	24.2661	0.467649	0.157144	0.418011	0.495251	0.231307	0.5612	0.531005	0.616056	0.191974	0.265671	0.473873	0.237739	0.588263	0.654372	0.217829	0.472032	0.552341	0.416366	0.370052	0.34873	0.402007	0.542671	0.584782	0.650486	0.407788	0.785667	0.499852	0.30992	0.509643	0.299691	0.496873	0.288903	0.400691	0.314815	0.272663	0.206267	0.52726	0.417748	0.290013	0.494817	0.0107067	0.419524	0.51896	0.497172	0.497172	0.497172	0.497172	0.497172
	24.6575	0.475928	0.156408	0.424709	0.48984	0.241845	0.564393	0.541975	0.617058	0.196641	0.264165	0.474053	0.2428	0.584439	0.64809	0.221709	0.46911	0.556603	0.428639	0.381995	0.361189	0.398258	0.539159	0.578297	0.648521	0.413097	0.781421	0.502817	0.321287	0.50533	0.289873	0.503541	0.284328	0.406312	0.30809	0.287859	0.211408	0.531981	0.429564	0.288501	0.495241	0.0172521	0.42995	0.511235	0.494595	0.494595	0.494595	0.494595	0.494595
	25.0489	0.484086	0.155579	0.431249	0.48479	0.25226	0.567242	0.551906	0.61819	0.200468	0.262993	0.473708	0.247869	0.581084	0.641998	0.225718	0.467502	0.560425	0.440876	0.394185	0.373476	0.395076	0.536195	0.572215	0.647216	0.418528	0.777306	0.506003	0.332439	0.501346	0.280878	0.510494	0.280283	0.412311	0.301546	0.302978	0.217106	0.536326	0.440804	0.287271	0.494156	0.0254015	0.440506	0.504418	0.492578	0.492578	0.492578	0.492578	0.492578
	25.4403	0.492116	0.154663	0.437654	0.480123	0.262475	0.569716	0.560801	0.619417	0.203538	0.262053	0.472908	0.252847	0.578229	0.636114	0.229838	0.467126	0.563794	0.452995	0.406518	0.385567	0.392448	0.533834	0.566561	0.646569	0.42402	0.773351	0.509377	0.343304	0.497723	0.272763	0.517702	0.276751	0.418612	0.295236	0.318002	0.223255	0.540255	0.451501	0.286376	0.49162	0.0338191	0.451111	0.498606	0.491123	0.491123	0.491123	0.491123	0.491123
	25.8317	0.500006	0.153647	0.443933	0.475878	0.272424	0.571828	0.568657	0.620707	0.205815	0.261441	0.471662	0.257656	0.575925	0.630472	0.234036	0.467905	0.566716	0.464931	0.418907	0.397439	0.390405	0.532144	0.5614	0.646558	0.429531	0.769582	0.51294	0.353878	0.494498	0.265599	0.525132	0.273757	0.425157	0.289242	0.33291	0.229756	0.543739	0.461605	0.285886	0.487658	0.0421969	0.461687	0.493876	0.49027	0.49027	0.49027	0.49027	0.49027
	26.2231	0.507742	0.152481	0.450089	0.472058	0.282046	0.573505	0.575471	0.622018	0.207331	0.26099	0.470029	0.262181	0.574157	0.625053	0.238259	0.469652	0.569145	0.476601	0.431256	0.409052	0.388887	0.531148	0.556729	0.647126	0.434972	0.766015	0.516627	0.364058	0.491676	0.259387	0.532745	0.271218	0.431844	0.283573	0.347676	0.236509	0.546721	0.471078	0.285835	0.482335	0.0504634	0.472148	0.490267	0.489969	0.489969	0.489969	0.489969	0.489969
	26.6145	0.515305	0.151134	0.456124	0.468681	0.291285	0.57476	0.58124	0.623318	0.208124	0.26079	0.468059	0.266392	0.57296	0.61987	0.242469	0.472215	0.571104	0.487955	0.443498	0.420391	0.38791	0.530886	0.552582	0.648206	0.44031	0.762666	0.520447	0.373859	0.489271	0.254129	0.540504	0.269143	0.438617	0.278279	0.362274	0.243418	0.549167	0.479928	0.286274	0.475697	0.0585942	0.482422	0.487795	0.490221	0.490221	0.490221	0.490221	0.490221
	27.0059	0.522674	0.149504	0.462004	0.465741	0.300088	0.575519	0.585951	0.624561	0.208154	0.260717	0.465763	0.270177	0.572293	0.614888	0.246581	0.475366	0.572537	0.49892	0.455551	0.43141	0.387404	0.531356	0.548947	0.649701	0.445447	0.759539	0.524332	0.383196	0.487274	0.249781	0.548362	0.26743	0.445369	0.273358	0.376667	0.250377	0.551015	0.488054	0.287223	0.46777	0.0665573	0.492424	0.486439	0.490957	0.490957	0.490957	0.490957	0.490957
	27.3973	0.529823	0.147532	0.467712	0.463231	0.308406	0.575769	0.589599	0.625714	0.207502	0.260765	0.463209	0.273516	0.572155	0.610093	0.250541	0.4789	0.573449	0.509448	0.467354	0.44209	0.38734	0.53256	0.54581	0.651506	0.450338	0.756638	0.528271	0.392053	0.485675	0.246273	0.556277	0.266039	0.452031	0.268833	0.390823	0.257281	0.55222	0.495484	0.28871	0.458593	0.0743202	0.502085	0.486156	0.492125	0.492125	0.492125	0.492125	0.492125
	27.7887	0.536727	0.145113	0.473195	0.461143	0.316197	0.575479	0.592168	0.626735	0.206101	0.260926	0.460379	0.276334	0.572506	0.605453	0.254276	0.482607	0.573805	0.519485	0.478845	0.452391	0.387671	0.534485	0.54316	0.653509	0.454911	0.753963	0.53222	0.400398	0.484462	0.243528	0.5642	0.264902	0.458522	0.264727	0.4047	0.264018	0.552736	0.502116	0.290749	0.448154	0.0818103	0.511328	0.486877	0.493661	0.493661	0.493661	0.493661	0.493661
	28.18	0.543363	0.142178	0.478425	0.459445	0.323425	0.574611	0.593653	0.627586	0.20402	0.261087	0.457327	0.278598	0.573299	0.600932	0.257732	0.486272	0.57358	0.528987	0.489967	0.462282	0.388322	0.537097	0.540939	0.655586	0.459104	0.751507	0.536133	0.408175	0.483614	0.241426	0.572083	0.263926	0.46476	0.261053	0.418262	0.270484	0.552515	0.50795	0.293343	0.436479	0.088963	0.520092	0.488515	0.495469	0.495469	0.495469	0.495469	0.495469
	28.5714	0.549706	0.138672	0.483374	0.458125	0.330069	0.57319	0.594054	0.628234	0.201232	0.261331	0.454061	0.280291	0.574511	0.596521	0.260883	0.489743	0.572774	0.537924	0.500674	0.471739	0.389271	0.54037	0.539128	0.657627	0.462889	0.749265	0.539999	0.415401	0.483122	0.23987	0.579877	0.263087	0.470699	0.257872	0.431472	0.276582	0.551539	0.512944	0.296501	0.423562	0.0957029	0.528321	0.490977	0.497498	0.497498	0.497498	0.497498	0.497498
	28.9628	0.555738	0.13455	0.488023	0.457139	0.336114	0.571179	0.593376	0.628637	0.197758	0.261507	0.450611	0.281363	0.576063	0.592176	0.263694	0.492832	0.571345	0.546254	0.510914	0.480716	0.390423	0.544243	0.537646	0.659515	0.466205	0.747225	0.543747	0.422004	0.482964	0.238724	0.587532	0.262276	0.476264	0.255204	0.44429	0.282231	0.549775	0.517053	0.300203	0.409436	0.101972	0.535964	0.494149	0.499635	0.499635	0.499635	0.499635	0.499635
	29.3542	0.561438	0.129832	0.492386	0.456462	0.341559	0.568634	0.591642	0.628771	0.193651	0.261702	0.447047	0.281851	0.577937	0.587899	0.266178	0.49544	0.569321	0.553967	0.520653	0.489199	0.391762	0.548677	0.536451	0.661152	0.469057	0.745375	0.547379	0.428015	0.483133	0.237877	0.594999	0.261487	0.481433	0.253128	0.456688	0.287378	0.54723	0.520308	0.304446	0.394151	0.107745	0.542987	0.497928	0.501827	0.501827	0.501827	0.501827	0.501827
	29.7456	0.566789	0.124517	0.496468	0.456047	0.346407	0.565545	0.588874	0.628597	0.188891	0.261826	0.443397	0.281713	0.580052	0.583658	0.268323	0.497437	0.566666	0.561031	0.529847	0.497143	0.393203	0.553596	0.535467	0.662438	0.471404	0.743697	0.55083	0.433389	0.483611	0.237206	0.602228	0.260639	0.486153	0.251676	0.468631	0.291987	0.543896	0.522643	0.309196	0.37777	0.113012	0.549356	0.502198	0.503973	0.503973	0.503973	0.503973	0.503973
	30.137	0.571774	0.118674	0.500301	0.455846	0.350668	0.561956	0.585113	0.628093	0.183592	0.261879	0.439771	0.280998	0.58237	0.57945	0.270139	0.498743	0.563411	0.567438	0.538468	0.504532	0.39471	0.558935	0.534621	0.66329	0.473255	0.74217	0.554088	0.438128	0.484382	0.236589	0.609173	0.25971	0.490409	0.250902	0.480093	0.296054	0.53979	0.524122	0.314424	0.360414	0.117808	0.555053	0.506851	0.506	0.506	0.506	0.506	0.506
	30.5284	0.576374	0.112344	0.503903	0.455817	0.35435	0.557897	0.580393	0.627231	0.177739	0.26188	0.436221	0.279705	0.58483	0.575258	0.271627	0.499282	0.559553	0.573171	0.546484	0.511334	0.396232	0.564616	0.533851	0.663628	0.474601	0.740771	0.557114	0.442238	0.485427	0.235926	0.615786	0.258673	0.494177	0.250838	0.491048	0.299586	0.534926	0.524703	0.320086	0.342187	0.122169	0.560059	0.511776	0.507835	0.507835	0.507835	0.507835	0.507835
	30.9198	0.580567	0.105587	0.50729	0.45589	0.357461	0.553374	0.574757	0.625987	0.171438	0.261729	0.432837	0.277859	0.587364	0.571057	0.272761	0.498969	0.555096	0.578213	0.553867	0.517522	0.397701	0.570547	0.533063	0.663376	0.475429	0.739467	0.559869	0.445683	0.486714	0.235094	0.622021	0.257473	0.49743	0.251485	0.501467	0.302612	0.529317	0.524419	0.326124	0.32325	0.126151	0.564362	0.516866	0.509381	0.509381	0.509381	0.509381	0.509381
	31.3112	0.584329	0.0984578	0.510473	0.456023	0.360005	0.548441	0.568242	0.624348	0.164727	0.261519	0.429696	0.275503	0.58993	0.56684	0.273535	0.497764	0.550067	0.582559	0.560597	0.523081	0.399098	0.576652	0.532208	0.662474	0.475752	0.738228	0.562346	0.448505	0.488212	0.234008	0.627836	0.256128	0.500167	0.252855	0.511326	0.305158	0.522987	0.523282	0.332489	0.303738	0.1298	0.567954	0.522018	0.510589	0.510589	0.510589	0.510589	0.510589
	31.7025	0.587634	0.0909708	0.51343	0.45614	0.361979	0.543076	0.560881	0.622289	0.157651	0.261117	0.426834	0.272633	0.592439	0.562565	0.2739	0.49558	0.544447	0.586185	0.566647	0.527978	0.400337	0.582825	0.531191	0.660854	0.475536	0.737014	0.564485	0.450656	0.489872	0.232559	0.633188	0.254571	0.502351	0.25489	0.520594	0.307246	0.51594	0.521268	0.339101	0.283805	0.133135	0.570821	0.527125	0.511356	0.511356	0.511356	0.511356	0.511356
	32.0939	0.590453	0.0831702	0.516154	0.456192	0.363379	0.537332	0.552707	0.619807	0.150302	0.260599	0.424323	0.269315	0.594854	0.558222	0.273836	0.492393	0.538269	0.589089	0.572005	0.532208	0.401409	0.588989	0.529961	0.658468	0.474795	0.735791	0.566296	0.452175	0.491652	0.230671	0.638038	0.252825	0.503987	0.257565	0.529248	0.308892	0.5082	0.518432	0.345904	0.263599	0.136171	0.572961	0.532095	0.511641	0.511641	0.511641	0.511641	0.511641
	32.4853	0.592757	0.0750495	0.518606	0.456114	0.364198	0.5312	0.543742	0.616883	0.142669	0.259898	0.422155	0.265537	0.597088	0.553768	0.273311	0.488153	0.531508	0.591253	0.576649	0.535744	0.402245	0.595045	0.528447	0.655268	0.473496	0.734517	0.567725	0.453043	0.493493	0.228269	0.642348	0.250852	0.505046	0.260795	0.537257	0.310092	0.499776	0.514721	0.352822	0.24325	0.138882	0.574364	0.536832	0.511368	0.511368	0.511368	0.511368	0.511368
	32.8767	0.594516	0.0666578	0.520767	0.455848	0.364434	0.524711	0.534015	0.613518	0.134861	0.259003	0.42037	0.261358	0.599099	0.549186	0.272306	0.482848	0.524182	0.592675	0.580571	0.538578	0.402819	0.600915	0.526587	0.651225	0.471641	0.733156	0.568771	0.453268	0.495343	0.225291	0.646084	0.248647	0.505529	0.264519	0.544595	0.310837	0.490688	0.510193	0.359794	0.222916	0.141247	0.575032	0.541257	0.510489	0.510489	0.510489	0.510489	0.510489
	33.2681	0.595706	0.0580609	0.522618	0.455352	0.364085	0.517901	0.523549	0.609704	0.126869	0.257955	0.418964	0.256792	0.600826	0.544453	0.270828	0.476495	0.516285	0.59335	0.583762	0.540699	0.403105	0.606523	0.524344	0.646323	0.469224	0.731673	0.569413	0.452879	0.497153	0.221708	0.649214	0.246222	0.505433	0.268663	0.55124	0.311103	0.480967	0.504825	0.366764	0.202734	0.143229	0.574967	0.545302	0.508975	0.508975	0.508975	0.508975	0.508975
	33.6595	0.596304	0.0494106	0.524147	0.454569	0.363161	0.510782	0.512376	0.605442	0.118771	0.256665	0.417937	0.251872	0.602216	0.539548	0.268873	0.469111	0.507813	0.593277	0.58621	0.542095	0.403057	0.611795	0.521653	0.64056	0.466237	0.730034	0.569627	0.451855	0.498872	0.217483	0.65171	0.243545	0.504753	0.273148	0.55717	0.310873	0.470639	0.498644	0.373674	0.182905	0.144808	0.574179	0.548912	0.506777	0.506777	0.506777	0.506777	0.506777
	34.0509	0.596294	0.0410404	0.525369	0.453472	0.361677	0.503437	0.500536	0.600738	0.110619	0.25524	0.417319	0.246655	0.603245	0.534481	0.266479	0.460784	0.498791	0.592469	0.587921	0.542769	0.402689	0.616683	0.5185	0.633961	0.462713	0.728215	0.569427	0.450258	0.500469	0.212626	0.653548	0.240664	0.503521	0.277939	0.562373	0.310132	0.45976	0.491693	0.380493	0.163654	0.145986	0.572686	0.552052	0.503908	0.503908	0.503908	0.503908	0.503908
	34.4423	0.595663	0.0335571	0.526291	0.452016	0.359652	0.49588	0.488068	0.595591	0.102453	0.253586	0.417088	0.241154	0.603861	0.529239	0.263662	0.451574	0.489204	0.590927	0.588886	0.542709	0.401954	0.621121	0.514837	0.62656	0.458647	0.726187	0.568777	0.448068	0.501905	0.207136	0.654706	0.237549	0.501738	0.282969	0.566835	0.308879	0.448376	0.483967	0.387173	0.1453	0.146776	0.570508	0.554697	0.500338	0.500338	0.500338	0.500338	0.500338
	34.8337	0.594401	0.0281565	0.526945	0.450181	0.357115	0.488207	0.475027	0.590018	0.0944	0.251788	0.417285	0.235452	0.604066	0.523851	0.260454	0.441607	0.479101	0.588673	0.589115	0.541928	0.400878	0.625079	0.510657	0.618419	0.454093	0.723934	0.567708	0.445344	0.503164	0.201038	0.655167	0.234239	0.499453	0.288229	0.570552	0.307132	0.436559	0.475558	0.393697	0.128276	0.147231	0.567682	0.556848	0.496094	0.496094	0.496094	0.496094	0.496094
	35.2251	0.592502	0.0264922	0.527347	0.447941	0.354091	0.480455	0.461463	0.584023	0.0864994	0.249825	0.41789	0.229567	0.603825	0.518324	0.256882	0.430989	0.46848	0.585717	0.58861	0.54042	0.399439	0.628509	0.505945	0.609609	0.449067	0.721437	0.566196	0.4421	0.504223	0.194365	0.654916	0.230735	0.496684	0.293681	0.573519	0.304923	0.424377	0.466461	0.400029	0.113157	0.147403	0.564238	0.558507	0.491182	0.491182	0.491182	0.491182	0.491182
	35.6164	0.589961	0.0293614	0.527513	0.445274	0.350606	0.472691	0.447436	0.577624	0.0789157	0.247691	0.418905	0.223574	0.603146	0.512686	0.252947	0.419841	0.457387	0.582077	0.587379	0.538196	0.397648	0.631382	0.50069	0.600216	0.443614	0.718682	0.564262	0.43836	0.505071	0.187139	0.653944	0.22704	0.493476	0.299313	0.575739	0.302302	0.411903	0.456764	0.406149	0.100716	0.147367	0.560216	0.559697	0.485623	0.485623	0.485623	0.485623	0.485623
	36.0078	0.586773	0.0357051	0.527451	0.44217	0.34668	0.464979	0.432997	0.570835	0.0717512	0.245459	0.420312	0.217516	0.602022	0.506963	0.248672	0.408304	0.445849	0.577769	0.585433	0.535269	0.395518	0.63367	0.494911	0.590342	0.437772	0.71566	0.561914	0.434181	0.505694	0.179407	0.652243	0.223187	0.489868	0.305105	0.577213	0.299322	0.399217	0.446493	0.412032	0.0918178	0.147187	0.555654	0.560441	0.479457	0.479457	0.479457	0.479457	0.479457
	36.3992	0.582932	0.0439518	0.527143	0.438605	0.342329	0.457344	0.418197	0.563671	0.0651585	0.243049	0.422051	0.211435	0.600448	0.501169	0.244042	0.396481	0.433891	0.572803	0.582781	0.531643	0.393036	0.63534	0.488602	0.580086	0.43156	0.712358	0.559151	0.429557	0.506073	0.171185	0.649809	0.219146	0.485884	0.311014	0.577941	0.296043	0.386385	0.435692	0.417646	0.0872545	0.14692	0.550591	0.560767	0.472695	0.472695	0.472695	0.472695	0.472695
	36.7906	0.578433	0.0531099	0.526582	0.43458	0.337562	0.449856	0.40308	0.556157	0.0593347	0.240568	0.424093	0.205396	0.598445	0.495336	0.23907	0.384522	0.421565	0.567202	0.579441	0.527343	0.390241	0.63638	0.481801	0.569569	0.425026	0.708772	0.55601	0.424561	0.506197	0.162516	0.646642	0.214957	0.481574	0.317011	0.577931	0.292513	0.373487	0.424428	0.422972	0.0872915	0.146616	0.545066	0.560706	0.4654	0.4654	0.4654	0.4654	0.4654
	37.182	0.573269	0.0626723	0.525736	0.430075	0.332386	0.442512	0.387682	0.548305	0.0544137	0.237941	0.426341	0.199407	0.595997	0.489465	0.233756	0.372533	0.408876	0.560969	0.575422	0.522376	0.387113	0.636759	0.474521	0.558902	0.418172	0.704895	0.552479	0.41919	0.506037	0.153427	0.642744	0.210592	0.476947	0.323018	0.57718	0.288766	0.360584	0.412696	0.42797	0.0915107	0.1463	0.539109	0.560284	0.457589	0.457589	0.457589	0.457589	0.457589
	37.5734	0.567435	0.0723674	0.524587	0.425095	0.326803	0.435366	0.372039	0.540145	0.0506281	0.235232	0.428741	0.193539	0.593139	0.483583	0.228112	0.360663	0.395881	0.554128	0.570747	0.51677	0.383691	0.636475	0.466806	0.548214	0.411039	0.700729	0.548605	0.413496	0.505577	0.143955	0.638121	0.20607	0.472048	0.328985	0.575698	0.284824	0.347751	0.400585	0.432626	0.0989394	0.146005	0.532759	0.559535	0.449327	0.449327	0.449327	0.449327	0.449327
	37.9648	0.560927	0.0820881	0.523121	0.419639	0.320818	0.42842	0.356178	0.531692	0.0480888	0.23244	0.431214	0.187788	0.589863	0.477689	0.222175	0.349046	0.382588	0.54669	0.565429	0.510541	0.379978	0.635516	0.458698	0.537633	0.403632	0.696274	0.544389	0.407509	0.50479	0.134148	0.63278	0.201401	0.466892	0.334824	0.573488	0.280689	0.335054	0.388084	0.436911	0.108534	0.145747	0.526045	0.558486	0.440661	0.440661	0.440661	0.440661	0.440661
	38.3562	0.553745	0.09175	0.52133	0.413709	0.31444	0.421698	0.34013	0.522975	0.0468862	0.229549	0.433681	0.182202	0.5862	0.471801	0.215969	0.337828	0.369038	0.538676	0.559489	0.503714	0.375995	0.633883	0.450239	0.527292	0.395979	0.691538	0.539865	0.401247	0.503659	0.124049	0.626734	0.196575	0.461507	0.340466	0.570561	0.276354	0.322565	0.375267	0.44081	0.119408	0.145557	0.519002	0.557172	0.431648	0.431648	0.431648	0.431648	0.431648
	38.7475	0.545895	0.101321	0.519231	0.407328	0.307681	0.415229	0.323927	0.514015	0.0470169	0.226647	0.436109	0.176795	0.582173	0.465932	0.209556	0.32718	0.355264	0.530111	0.552952	0.496318	0.371782	0.631591	0.441502	0.517335	0.38811	0.686535	0.535063	0.394776	0.50217	0.113732	0.619997	0.191642	0.455927	0.345855	0.56693	0.271802	0.310367	0.362166	0.444319	0.130921	0.145473	0.511665	0.555629	0.422374	0.422374	0.422374	0.422374	0.422374
	39.1389	0.537385	0.11076	0.516832	0.400502	0.300559	0.409006	0.307603	0.504835	0.048308	0.223663	0.438419	0.171578	0.577802	0.460091	0.202973	0.317241	0.341288	0.521014	0.545836	0.488374	0.367344	0.62865	0.432532	0.507897	0.380043	0.681279	0.529997	0.388091	0.500314	0.103255	0.612587	0.186591	0.450168	0.350929	0.562611	0.26702	0.298534	0.348818	0.447428	0.142634	0.145541	0.504069	0.553895	0.412893	0.412893	0.412893	0.412893	0.412893
	39.5303	0.528231	0.120011	0.514168	0.393267	0.293096	0.40308	0.291201	0.495464	0.0506056	0.220714	0.440599	0.166589	0.573143	0.454309	0.196276	0.308191	0.327177	0.511422	0.538172	0.47992	0.362746	0.625094	0.423418	0.499126	0.371835	0.675795	0.524723	0.381266	0.498097	0.0927033	0.604524	0.181484	0.44428	0.355675	0.557627	0.262001	0.287161	0.335309	0.45015	0.15423	0.145834	0.496255	0.552018	0.403313	0.403313	0.403313	0.403313	0.403313
	39.9217	0.51845	0.129032	0.511258	0.385642	0.285318	0.397434	0.274763	0.485921	0.0536417	0.217752	0.442591	0.161815	0.568217	0.448596	0.189508	0.300151	0.312953	0.501356	0.529978	0.470979	0.357996	0.620943	0.414223	0.491153	0.363505	0.670107	0.519245	0.374308	0.495524	0.0821534	0.595832	0.176341	0.438277	0.360058	0.552001	0.256749	0.276329	0.321652	0.452483	0.165509	0.146414	0.488258	0.550042	0.393699	0.393699	0.393699	0.393699	0.393699
	40.3131	0.508065	0.13774	0.508119	0.377662	0.277247	0.392109	0.258341	0.476237	0.0572075	0.214842	0.444368	0.157301	0.563093	0.442991	0.182696	0.293256	0.298699	0.490853	0.521288	0.461588	0.353157	0.616241	0.405035	0.484107	0.355115	0.664246	0.513623	0.367264	0.492617	0.071679	0.586539	0.171212	0.432205	0.364091	0.54576	0.251285	0.266133	0.307953	0.454445	0.1763	0.147359	0.48012	0.548019	0.384157	0.384157	0.384157	0.384157	0.384157
	40.7045	0.497097	0.146093	0.504765	0.369362	0.268905	0.387096	0.241978	0.466428	0.0611271	0.21201	0.445895	0.153028	0.557806	0.437509	0.175878	0.287587	0.284462	0.47994	0.512125	0.451779	0.348257	0.611019	0.395942	0.478094	0.346698	0.658241	0.507874	0.360173	0.489394	0.0613667	0.576671	0.166164	0.426086	0.367764	0.538934	0.245633	0.256654	0.294234	0.456039	0.186511	0.148732	0.471876	0.545992	0.374768	0.374768	0.374768	0.374768	0.374768
	41.0959	0.485571	0.154027	0.501187	0.360772	0.260307	0.382396	0.225723	0.456525	0.065203	0.209236	0.447108	0.149023	0.552419	0.432176	0.169061	0.283185	0.270324	0.468645	0.502517	0.441582	0.343338	0.605316	0.387022	0.473201	0.338296	0.652125	0.50204	0.353041	0.485879	0.0512799	0.566261	0.161232	0.419944	0.371077	0.53155	0.239834	0.247968	0.280574	0.457272	0.196058	0.150586	0.463561	0.544006	0.365615	0.365615	0.365615	0.365615	0.365615
	41.4873	0.473511	0.161515	0.497387	0.351934	0.251463	0.37801	0.209618	0.446547	0.0693572	0.206612	0.447986	0.145279	0.546984	0.427013	0.162272	0.280062	0.256365	0.457	0.492494	0.43104	0.338453	0.599174	0.378379	0.469488	0.329951	0.645931	0.496157	0.345929	0.482098	0.0415124	0.555343	0.156518	0.413808	0.374025	0.523638	0.233921	0.240144	0.267028	0.458149	0.204908	0.152954	0.455205	0.542093	0.356793	0.356793	0.356793	0.356793	0.356793
	41.8787	0.460938	0.168552	0.493345	0.342873	0.242376	0.373895	0.193697	0.436516	0.0734456	0.204065	0.448454	0.141787	0.541543	0.422024	0.155525	0.278154	0.242661	0.445023	0.48208	0.420177	0.333616	0.592626	0.370086	0.466979	0.321679	0.639689	0.490244	0.338822	0.478067	0.0321663	0.543951	0.152067	0.407675	0.37657	0.515224	0.227925	0.233225	0.253629	0.458662	0.213052	0.155838	0.446828	0.540277	0.348357	0.348357	0.348357	0.348357	0.348357
	42.2701	0.447877	0.175143	0.489057	0.333637	0.23305	0.370051	0.177998	0.426459	0.0774229	0.201693	0.448484	0.138556	0.53616	0.417225	0.148845	0.277393	0.229324	0.432748	0.471307	0.409039	0.328892	0.585722	0.362247	0.465673	0.313522	0.633433	0.484354	0.331774	0.473812	0.023441	0.532124	0.14799	0.401566	0.378692	0.506338	0.221865	0.227251	0.240464	0.458816	0.2205	0.159227	0.438453	0.538574	0.340397	0.340397	0.340397	0.340397	0.340397
	42.6615	0.434354	0.18134	0.484523	0.324254	0.223484	0.366411	0.16255	0.416389	0.0812297	0.199445	0.448029	0.135546	0.53086	0.412599	0.142271	0.277629	0.216431	0.420195	0.460198	0.397652	0.324286	0.578493	0.35493	0.465524	0.305477	0.62719	0.478489	0.324777	0.469342	0.0158467	0.519901	0.144363	0.395467	0.380327	0.497007	0.215742	0.222228	0.227539	0.458599	0.227307	0.163071	0.430089	0.536982	0.332951	0.332951	0.332951	0.332951	0.332951
	43.0528	0.420394	0.187174	0.479752	0.314767	0.213679	0.362958	0.147391	0.406334	0.0848125	0.197357	0.447056	0.13277	0.525703	0.408151	0.135833	0.278727	0.204116	0.407394	0.448785	0.386055	0.319851	0.570992	0.34822	0.466468	0.297576	0.620993	0.472698	0.317854	0.464678	0.0109769	0.507324	0.141279	0.389382	0.381436	0.487259	0.209549	0.218153	0.214951	0.458015	0.233514	0.167316	0.421749	0.535497	0.326084	0.326084	0.326084	0.326084	0.326084
	43.4442	0.406031	0.192716	0.474774	0.305219	0.203641	0.359635	0.132565	0.396309	0.0881877	0.195451	0.445566	0.130176	0.52071	0.403856	0.129591	0.280507	0.192481	0.394373	0.437095	0.374284	0.315606	0.563262	0.342183	0.468406	0.289822	0.614868	0.466989	0.311023	0.459833	0.0117256	0.494435	0.138845	0.3833	0.381966	0.477125	0.203258	0.214999	0.202724	0.457062	0.239206	0.171883	0.413438	0.534101	0.319829	0.319829	0.319829	0.319829	0.319829
	43.8356	0.391299	0.198009	0.469616	0.295647	0.193384	0.356403	0.118133	0.386334	0.0912986	0.193683	0.443527	0.127764	0.515924	0.399705	0.123581	0.282792	0.181671	0.381163	0.425154	0.362367	0.311575	0.555355	0.336868	0.471219	0.282228	0.608845	0.46139	0.304273	0.454827	0.0167422	0.481281	0.137115	0.377209	0.381878	0.466636	0.196843	0.212721	0.190941	0.455743	0.244443	0.176692	0.405163	0.532773	0.314213	0.314213	0.314213	0.314213	0.314213
	44.227	0.376241	0.203098	0.464324	0.286104	0.182923	0.353236	0.104185	0.376429	0.094188	0.192135	0.44097	0.125503	0.511377	0.395684	0.117855	0.285424	0.17183	0.367803	0.412997	0.350346	0.307798	0.547329	0.332331	0.474776	0.274819	0.602952	0.455923	0.297643	0.449686	0.0229264	0.46791	0.136187	0.37111	0.381163	0.455828	0.190275	0.211266	0.179674	0.454073	0.249302	0.181669	0.39693	0.53149	0.309266	0.309266	0.309266	0.309266	0.309266
	44.6184	0.360904	0.208022	0.458933	0.27663	0.172282	0.350081	0.0908454	0.366608	0.0968229	0.190726	0.437885	0.123368	0.507088	0.391773	0.112451	0.288226	0.163105	0.354323	0.400646	0.338245	0.304272	0.539231	0.328582	0.478933	0.267595	0.597216	0.450589	0.291106	0.444437	0.0291567	0.454371	0.136072	0.364983	0.379801	0.444734	0.183531	0.21056	0.168984	0.452058	0.253843	0.186735	0.388742	0.530223	0.304975	0.304975	0.304975	0.304975	0.304975
	45.0098	0.345343	0.212784	0.453478	0.26728	0.161487	0.346941	0.0783091	0.356894	0.0992184	0.189536	0.434291	0.121358	0.503097	0.387973	0.107394	0.291077	0.155665	0.34077	0.388138	0.326103	0.301042	0.531129	0.325648	0.483547	0.260596	0.591663	0.445423	0.284701	0.439121	0.0350715	0.440719	0.136807	0.358837	0.377823	0.433395	0.176603	0.210537	0.158992	0.44972	0.258113	0.191834	0.380611	0.528953	0.301357	0.301357	0.301357	0.301357	0.301357
	45.4012	0.329616	0.217413	0.44799	0.258096	0.150567	0.343768	0.0668622	0.347298	0.101381	0.18851	0.430202	0.119437	0.499408	0.384264	0.102715	0.293833	0.149636	0.32718	0.375499	0.313946	0.298096	0.523068	0.32351	0.488472	0.253824	0.586315	0.440408	0.278411	0.433774	0.0405317	0.427007	0.138359	0.352657	0.375237	0.421845	0.169493	0.211111	0.14975	0.447069	0.262161	0.196903	0.372542	0.527649	0.298374	0.298374	0.298374	0.298374	0.298374
	45.7926	0.313789	0.221898	0.442478	0.249126	0.139549	0.340569	0.0569503	0.337841	0.10328	0.187661	0.42561	0.117622	0.496055	0.380653	0.0984145	0.2964	0.145159	0.313599	0.362763	0.301804	0.295459	0.515109	0.32215	0.493571	0.247312	0.581193	0.435574	0.27225	0.428447	0.0454856	0.413295	0.140681	0.346449	0.372082	0.410121	0.162221	0.212213	0.141397	0.444122	0.266002	0.201901	0.364548	0.526295	0.296013	0.296013	0.296013	0.296013	0.296013
	46.184	0.297932	0.226262	0.436961	0.240416	0.128466	0.337318	0.0492232	0.328537	0.104947	0.187	0.420539	0.115882	0.493036	0.377127	0.0945161	0.298676	0.142285	0.30007	0.349961	0.289707	0.293126	0.507299	0.32153	0.49871	0.241073	0.576312	0.430905	0.266232	0.423182	0.049905	0.399643	0.143706	0.340207	0.368385	0.39826	0.154808	0.213765	0.133992	0.440889	0.269671	0.206778	0.356637	0.524864	0.294228	0.294228	0.294228	0.294228	0.294228
	46.5753	0.282122	0.230516	0.431443	0.232001	0.117349	0.334	0.0444871	0.319403	0.106328	0.186458	0.414967	0.114234	0.49036	0.373686	0.0910271	0.300575	0.141046	0.286635	0.337126	0.277674	0.291087	0.499681	0.321587	0.503768	0.235117	0.571683	0.426407	0.260339	0.418025	0.0538102	0.386113	0.147313	0.333926	0.364157	0.386291	0.147287	0.215699	0.127648	0.437373	0.273173	0.211482	0.34882	0.523335	0.292969	0.292969	0.292969	0.292969	0.292969
	46.9667	0.266446	0.234684	0.425942	0.223927	0.106241	0.330615	0.0433644	0.310455	0.107453	0.186091	0.408917	0.112669	0.488026	0.370325	0.0879674	0.302029	0.141382	0.273348	0.324294	0.265738	0.289344	0.4923	0.322269	0.508629	0.229463	0.567313	0.422078	0.254607	0.413018	0.0572207	0.372774	0.151415	0.327611	0.359425	0.374248	0.139682	0.217951	0.122434	0.433582	0.27653	0.21596	0.341109	0.521683	0.29219	0.29219	0.29219	0.29219	0.29219
	47.3581	0.251001	0.238816	0.420478	0.216215	0.095201	0.327124	0.0457662	0.301708	0.108289	0.185797	0.402383	0.111185	0.486012	0.367025	0.0853722	0.302948	0.143182	0.260252	0.311499	0.253912	0.287856	0.485183	0.323484	0.513185	0.224101	0.563199	0.417897	0.249008	0.408194	0.0601878	0.359692	0.155858	0.321244	0.354174	0.362155	0.132008	0.220457	0.118392	0.429509	0.279755	0.220139	0.333516	0.519881	0.291815	0.291815	0.291815	0.291815	0.291815
	47.7495	0.2359	0.242942	0.415081	0.208904	0.0843223	0.323537	0.050887	0.293181	0.108835	0.185618	0.395379	0.109797	0.484315	0.363786	0.0832667	0.303287	0.146292	0.247412	0.298783	0.242223	0.286624	0.478367	0.325167	0.517342	0.219046	0.559341	0.413873	0.24358	0.403587	0.0627698	0.346942	0.160541	0.314836	0.348419	0.35004	0.124273	0.223169	0.11557	0.425162	0.28286	0.223951	0.326056	0.517904	0.291801	0.291801	0.291801	0.291801	0.291801
	48.1409	0.221276	0.247129	0.409802	0.202012	0.0737566	0.319809	0.0577443	0.284886	0.109106	0.185485	0.38794	0.108481	0.482889	0.360577	0.0817024	0.302972	0.150507	0.234885	0.286186	0.230685	0.285594	0.471871	0.327218	0.521008	0.214278	0.555726	0.409969	0.238313	0.399216	0.0650329	0.334596	0.165319	0.308371	0.342149	0.337928	0.116465	0.226029	0.113918	0.420535	0.285871	0.227308	0.318745	0.515721	0.292068	0.292068	0.292068	0.292068	0.292068
	48.5323	0.207285	0.251405	0.404684	0.195561	0.0637569	0.31595	0.0655668	0.276842	0.109074	0.185379	0.380077	0.107264	0.48172	0.357393	0.080706	0.301969	0.155647	0.222748	0.273757	0.219314	0.284752	0.465722	0.32956	0.524107	0.209804	0.552344	0.406192	0.233228	0.395103	0.0670663	0.322734	0.170074	0.301861	0.335377	0.32584	0.10857	0.228999	0.113423	0.415634	0.28879	0.230137	0.311607	0.51331	0.292571	0.292571	0.292571	0.292571	0.292571
	48.9237	0.194113	0.255816	0.399787	0.189568	0.0547486	0.311937	0.0738551	0.269063	0.108787	0.1853	0.371854	0.10612	0.480758	0.354208	0.0803079	0.300247	0.161491	0.211084	0.261547	0.208129	0.284053	0.459935	0.332107	0.526571	0.205612	0.549179	0.40251	0.228352	0.391263	0.068949	0.311435	0.174703	0.29531	0.32813	0.3138	0.100562	0.232034	0.113959	0.410468	0.291639	0.232366	0.304669	0.510648	0.293248	0.293248	0.293248	0.293248	0.293248
	49.3151	0.181979	0.260376	0.395158	0.184038	0.047423	0.307766	0.082292	0.261568	0.108213	0.185168	0.363295	0.105068	0.479972	0.351009	0.080519	0.29779	0.167876	0.199986	0.249614	0.197135	0.283461	0.454524	0.334774	0.528348	0.201697	0.546213	0.398913	0.223685	0.387707	0.07079	0.300782	0.179078	0.288728	0.320441	0.301829	0.0924213	0.235103	0.115445	0.405044	0.294407	0.233935	0.297965	0.507721	0.294052	0.294052	0.294052	0.294052	0.294052
	49.7065	0.171129	0.265078	0.390837	0.178986	0.0427721	0.303457	0.0906771	0.25437	0.107394	0.185033	0.354458	0.104098	0.479324	0.34779	0.0813215	0.294622	0.174617	0.189565	0.238028	0.186354	0.282951	0.449506	0.337495	0.5294	0.198068	0.54343	0.395391	0.219289	0.384449	0.0726849	0.290856	0.183134	0.282148	0.312385	0.289951	0.0841354	0.238182	0.117727	0.399387	0.297091	0.23481	0.291541	0.504524	0.294955	0.294955	0.294955	0.294955	0.294955
	50.0979	0.161836	0.269912	0.386859	0.174403	0.0417902	0.298998	0.0988752	0.247486	0.106322	0.1848	0.345387	0.103208	0.478769	0.344538	0.0826982	0.290752	0.181576	0.179935	0.226859	0.175787	0.282469	0.444881	0.340189	0.529703	0.194715	0.540807	0.391915	0.215163	0.381495	0.0747466	0.281738	0.186756	0.275588	0.304024	0.278181	0.0757029	0.241249	0.12068	0.393505	0.299664	0.234962	0.285444	0.50106	0.295912	0.295912	0.295912	0.295912	0.295912
	50.4892	0.154379	0.274824	0.383234	0.170293	0.0447728	0.294435	0.106786	0.240933	0.105001	0.184511	0.336114	0.102414	0.478286	0.341263	0.0845969	0.286241	0.188626	0.17123	0.216197	0.16545	0.282008	0.44066	0.34281	0.529255	0.19166	0.538328	0.388494	0.211378	0.37886	0.0770814	0.273508	0.189894	0.269103	0.295467	0.266539	0.0671404	0.244301	0.12418	0.387429	0.302084	0.234394	0.279737	0.497346	0.296922	0.296922	0.296922	0.296922	0.296922
	50.8806	0.149011	0.279781	0.379978	0.16664	0.0510505	0.289767	0.114341	0.234722	0.103455	0.184113	0.326694	0.101698	0.477825	0.337962	0.0869785	0.281129	0.195649	0.163579	0.206133	0.155351	0.281515	0.436832	0.345293	0.528062	0.188897	0.53597	0.385093	0.207956	0.376545	0.0797847	0.266235	0.192471	0.262729	0.286805	0.255039	0.0584741	0.247328	0.128089	0.38117	0.304309	0.233106	0.274481	0.493404	0.297955	0.297955	0.297955	0.297955	0.297955
	51.272	0.145923	0.284714	0.377092	0.16343	0.0595893	0.285041	0.121482	0.228871	0.101648	0.183588	0.317142	0.101091	0.477374	0.334653	0.0897934	0.275481	0.20257	0.15712	0.196775	0.1455	0.280978	0.433396	0.347602	0.526152	0.186449	0.533713	0.381725	0.204952	0.374561	0.0829507	0.259984	0.194432	0.256529	0.278148	0.243691	0.0497467	0.250339	0.132334	0.37475	0.30627	0.231111	0.269746	0.489271	0.299022	0.299022	0.299022	0.299022	0.299022
	51.6634	0.145201	0.28958	0.374584	0.160645	0.0695488	0.280273	0.128171	0.223388	0.0996199	0.182954	0.307515	0.100573	0.476895	0.331342	0.0929959	0.269357	0.209295	0.151974	0.188238	0.135913	0.280364	0.430335	0.349702	0.523561	0.184319	0.531536	0.37837	0.202422	0.372904	0.0866366	0.254804	0.19574	0.250561	0.26961	0.232501	0.0410049	0.253336	0.13679	0.368186	0.30792	0.228422	0.265602	0.484985	0.300115	0.300115	0.300115	0.300115	0.300115
	52.0548	0.146807	0.294333	0.372464	0.158254	0.0803848	0.275487	0.134381	0.218286	0.0973314	0.182131	0.297839	0.100167	0.476371	0.328042	0.096558	0.262808	0.215786	0.148238	0.180643	0.126601	0.279647	0.427629	0.351561	0.520338	0.182516	0.529415	0.375032	0.200395	0.37157	0.0908979	0.250729	0.196336	0.244886	0.261286	0.221471	0.0323063	0.256329	0.14142	0.361486	0.309187	0.22504	0.262118	0.480593	0.301241	0.301241	0.301241	0.301241	0.301241
	52.4462	0.15058	0.298934	0.370744	0.156236	0.0917671	0.270718	0.140095	0.213573	0.0948094	0.181177	0.288166	0.0998659	0.475781	0.324766	0.100436	0.255906	0.221978	0.145981	0.174117	0.117592	0.278817	0.425258	0.353172	0.516539	0.181052	0.52733	0.371713	0.198946	0.370547	0.0957459	0.247776	0.196215	0.239581	0.253298	0.210602	0.0237337	0.259325	0.146132	0.354671	0.31003	0.220972	0.25936	0.476141	0.302413	0.302413	0.302413	0.302413	0.302413
	52.8376	0.156264	0.303371	0.369451	0.154552	0.103495	0.265964	0.14531	0.209254	0.0920477	0.180003	0.27856	0.0996672	0.475099	0.321512	0.104609	0.248692	0.227846	0.145216	0.168779	0.108909	0.277837	0.423188	0.35451	0.512226	0.179916	0.525257	0.368405	0.198086	0.36981	0.101185	0.245942	0.195329	0.2347	0.24574	0.199887	0.0154786	0.262323	0.150894	0.347745	0.310405	0.216206	0.257382	0.471677	0.303628	0.303628	0.303628	0.303628	0.303628
	53.229	0.163556	0.307613	0.368595	0.153178	0.115437	0.261267	0.150023	0.205334	0.0890456	0.178648	0.269076	0.0995799	0.474322	0.318295	0.109034	0.241246	0.233361	0.145917	0.164741	0.100599	0.276712	0.421397	0.355588	0.50747	0.179123	0.523176	0.365133	0.19788	0.369339	0.10719	0.245201	0.193685	0.230327	0.238735	0.18932	0.00843549	0.265328	0.155661	0.340732	0.310285	0.210744	0.256234	0.467253	0.304912	0.304912	0.304912	0.304912	0.304912
	53.6204	0.172139	0.311664	0.368197	0.152077	0.127505	0.256616	0.154242	0.201808	0.0858422	0.177078	0.259814	0.0995763	0.473419	0.315105	0.113672	0.233628	0.238493	0.147996	0.162082	0.0927151	0.275409	0.419845	0.3564	0.50234	0.17865	0.521064	0.361886	0.198336	0.369093	0.11372	0.24551	0.191271	0.226518	0.232392	0.178893	0.00751885	0.268327	0.160381	0.333643	0.309664	0.20458	0.255947	0.462912	0.306257	0.306257	0.306257	0.306257	0.306257
	54.0117	0.181716	0.315494	0.368255	0.151224	0.139629	0.252047	0.157968	0.198677	0.0824179	0.175272	0.250841	0.0996704	0.472396	0.311948	0.118475	0.225924	0.243241	0.151339	0.160858	0.0853368	0.273934	0.41851	0.356964	0.49692	0.178503	0.518906	0.358698	0.199482	0.369039	0.120726	0.246808	0.188093	0.223344	0.226829	0.168595	0.0139709	0.271313	0.165052	0.326507	0.308528	0.19773	0.25654	0.458707	0.307686	0.307686	0.307686	0.307686	0.307686
	54.4031	0.192019	0.319085	0.368756	0.150592	0.151751	0.247567	0.161208	0.19593	0.0788328	0.17327	0.242262	0.0998259	0.471234	0.308821	0.12338	0.218237	0.247569	0.155794	0.161076	0.078574	0.272274	0.417359	0.357298	0.491293	0.178664	0.516685	0.355573	0.20133	0.369134	0.128135	0.249019	0.184189	0.22086	0.22217	0.158417	0.022085	0.274268	0.169612	0.319352	0.306895	0.190221	0.258014	0.454682	0.309197	0.309197	0.309197	0.309197	0.309197
	54.7945	0.202819	0.3224	0.369677	0.150156	0.16382	0.243194	0.163963	0.193558	0.0750746	0.171007	0.234163	0.100046	0.469939	0.305724	0.128336	0.210663	0.251483	0.161202	0.162701	0.0725609	0.270431	0.416365	0.35742	0.485547	0.179125	0.51439	0.352537	0.203861	0.369337	0.135884	0.252057	0.179569	0.219115	0.218512	0.148347	0.0305853	0.277174	0.174078	0.312208	0.304761	0.182096	0.260354	0.450886	0.3108	0.3108	0.3108	0.3108	0.3108
	55.1859	0.213924	0.325383	0.370969	0.149903	0.175787	0.238965	0.166233	0.191545	0.0711844	0.168557	0.226624	0.100308	0.468517	0.302668	0.133274	0.203341	0.254953	0.167405	0.165662	0.0674823	0.268421	0.415509	0.357371	0.479782	0.179883	0.512013	0.34962	0.207087	0.369613	0.143886	0.255829	0.174311	0.218156	0.215965	0.138379	0.0392341	0.280016	0.178404	0.30512	0.302142	0.173424	0.263529	0.447366	0.312506	0.312506	0.312506	0.312506	0.312506
	55.5773	0.225174	0.327986	0.372592	0.149813	0.187611	0.234886	0.168018	0.189872	0.067178	0.165865	0.219742	0.100596	0.46697	0.299652	0.138143	0.196381	0.257977	0.174247	0.169848	0.0635351	0.266236	0.414763	0.357171	0.474094	0.180916	0.50955	0.346838	0.210953	0.369924	0.152068	0.260239	0.168452	0.217998	0.214585	0.1285	0.0479481	0.282769	0.182601	0.298119	0.299038	0.164281	0.267492	0.444167	0.314305	0.314305	0.314305	0.314305	0.314305
	55.9687	0.236439	0.330135	0.374488	0.149883	0.199254	0.23101	0.16932	0.188522	0.0630556	0.162978	0.213571	0.10091	0.46533	0.296699	0.142893	0.189924	0.260546	0.181595	0.175133	0.0609383	0.263916	0.414117	0.356871	0.46859	0.182233	0.507	0.344239	0.215456	0.370246	0.160346	0.265193	0.162088	0.218663	0.214424	0.118706	0.056671	0.285422	0.186661	0.291255	0.295447	0.154764	0.272188	0.441334	0.316215	0.316215	0.316215	0.316215	0.316215
	56.3601	0.24761	0.331782	0.376613	0.1501	0.210687	0.227344	0.170146	0.187465	0.0588599	0.159897	0.208194	0.101221	0.463602	0.293812	0.147481	0.184085	0.262643	0.189318	0.181372	0.059858	0.26146	0.413544	0.3565	0.463368	0.18381	0.504363	0.341835	0.220531	0.370551	0.168642	0.270597	0.155307	0.220135	0.215478	0.108989	0.0653573	0.287953	0.190576	0.284562	0.291373	0.144974	0.277545	0.438902	0.318213	0.318213	0.318213	0.318213	0.318213
	56.7515	0.258601	0.332871	0.378926	0.150467	0.221884	0.223934	0.170508	0.18668	0.0545639	0.156604	0.203659	0.101543	0.461829	0.291014	0.151882	0.178973	0.264283	0.197317	0.188426	0.0603843	0.258909	0.413036	0.356108	0.458529	0.185652	0.501645	0.339679	0.226144	0.370821	0.17689	0.276364	0.148215	0.222397	0.217717	0.0993466	0.0739616	0.290352	0.194379	0.278084	0.286803	0.135021	0.28349	0.436907	0.320305	0.320305	0.320305	0.320305	0.320305
	57.1429	0.26934	0.333374	0.381386	0.15098	0.232827	0.220794	0.170426	0.186136	0.0502149	0.153163	0.200023	0.101851	0.460027	0.288314	0.15606	0.174684	0.265449	0.205492	0.196152	0.0624835	0.256282	0.412572	0.355737	0.454162	0.187739	0.49885	0.33779	0.232242	0.371038	0.185017	0.282412	0.14096	0.225407	0.221074	0.089787	0.0824477	0.292598	0.198045	0.271859	0.281749	0.125027	0.28994	0.435368	0.322468	0.322468	0.322468	0.322468	0.322468
	57.5342	0.279766	0.333279	0.38397	0.151638	0.243501	0.217944	0.169929	0.185807	0.0457972	0.149514	0.197338	0.102155	0.458234	0.285721	0.160002	0.171273	0.266168	0.213766	0.204423	0.0660173	0.253608	0.412139	0.355422	0.450346	0.19006	0.495984	0.336207	0.238756	0.371189	0.192976	0.288665	0.133673	0.229109	0.225441	0.080324	0.0907889	0.294672	0.201625	0.265921	0.276211	0.115124	0.29681	0.434298	0.32468	0.32468	0.32468	0.32468	0.32468
	57.9256	0.289829	0.332578	0.38664	0.152445	0.253895	0.21541	0.169049	0.185662	0.041338	0.145734	0.19562	0.102444	0.45648	0.283244	0.163676	0.168789	0.266436	0.222067	0.21312	0.0707875	0.250928	0.411727	0.355217	0.447146	0.192602	0.493055	0.334962	0.245652	0.371259	0.200708	0.295055	0.12656	0.233441	0.230704	0.0709977	0.0989697	0.296556	0.205099	0.260312	0.270216	0.105477	0.304014	0.433693	0.326922	0.326922	0.326922	0.326922	0.326922
	58.317	0.299484	0.331298	0.38937	0.153394	0.263996	0.213181	0.167826	0.185669	0.0368638	0.141782	0.194904	0.102709	0.454786	0.280876	0.167057	0.167222	0.266275	0.230332	0.222133	0.0765715	0.248256	0.411315	0.355144	0.444606	0.195333	0.49007	0.334073	0.252842	0.371231	0.208176	0.301519	0.119806	0.238316	0.236706	0.0618793	0.10699	0.298216	0.208502	0.25506	0.263796	0.096282	0.311463	0.433538	0.329145	0.329145	0.329145	0.329145	0.329145
	58.7084	0.308693	0.329445	0.392118	0.154493	0.273792	0.211284	0.166297	0.185804	0.0323786	0.137694	0.195168	0.102958	0.453192	0.278622	0.170116	0.166557	0.265704	0.23851	0.23137	0.083176	0.245647	0.410902	0.355253	0.442756	0.19824	0.487038	0.333579	0.260294	0.371095	0.21534	0.308004	0.113662	0.243663	0.243309	0.0531073	0.114856	0.29963	0.211839	0.250209	0.256994	0.0878022	0.319071	0.433806	0.331326	0.331326	0.331326	0.331326	0.331326
	59.0998	0.317422	0.327045	0.394833	0.155732	0.283265	0.209698	0.164505	0.186033	0.0279509	0.133495	0.196384	0.103165	0.451706	0.276466	0.172809	0.166729	0.264726	0.246548	0.240741	0.0904232	0.243113	0.410473	0.355561	0.441599	0.201279	0.483969	0.333481	0.267928	0.370831	0.222161	0.314458	0.108371	0.249382	0.250347	0.0449378	0.122582	0.300756	0.215111	0.245789	0.249876	0.0803632	0.32675	0.434454	0.333405	0.333405	0.333405	0.333405	0.333405
	59.4912	0.325641	0.324101	0.397465	0.157114	0.292399	0.208436	0.162486	0.186334	0.0235903	0.129163	0.198496	0.103345	0.450363	0.274404	0.175111	0.167659	0.263373	0.254409	0.250176	0.0981833	0.240705	0.41003	0.356098	0.441126	0.204433	0.480871	0.33381	0.275699	0.37043	0.228611	0.320839	0.104189	0.255392	0.257678	0.037844	0.130181	0.301564	0.218351	0.241839	0.242495	0.0743595	0.334422	0.435435	0.33535	0.33535	0.33535	0.33535	0.33535
	59.8826	0.333325	0.320611	0.399947	0.158633	0.301173	0.207488	0.160276	0.186676	0.0193914	0.124781	0.201407	0.103471	0.449169	0.272426	0.176977	0.169255	0.261638	0.262051	0.259603	0.106341	0.238446	0.409569	0.356883	0.441306	0.207663	0.477759	0.334559	0.283552	0.36988	0.23465	0.327109	0.101353	0.261601	0.265164	0.0326491	0.137661	0.302017	0.221535	0.238396	0.234934	0.07021	0.342005	0.436688	0.337107	0.337107	0.337107	0.337107	0.337107
	60.274	0.340454	0.31657	0.402227	0.160283	0.309567	0.206849	0.157914	0.187038	0.0154447	0.120302	0.205032	0.103549	0.448146	0.270521	0.178385	0.171398	0.259549	0.269446	0.268965	0.114811	0.236371	0.409093	0.35792	0.442091	0.210941	0.474643	0.335739	0.291424	0.369175	0.240253	0.333234	0.100012	0.267927	0.272679	0.0304733	0.14502	0.302081	0.224709	0.235487	0.22725	0.0682554	0.349428	0.438154	0.338631	0.338631	0.338631	0.338631	0.338631
	60.6654	0.347013	0.311947	0.404246	0.162063	0.317563	0.206527	0.155435	0.187396	0.0119436	0.11581	0.209242	0.103572	0.447304	0.268691	0.179316	0.173991	0.257103	0.276567	0.27821	0.123525	0.234519	0.408612	0.359225	0.443425	0.214246	0.471539	0.337346	0.299289	0.368319	0.245386	0.339187	0.10026	0.274297	0.280132	0.0320734	0.152243	0.301731	0.227852	0.233147	0.219516	0.0686464	0.356625	0.439768	0.339886	0.339886	0.339886	0.339886	0.339886
	61.0568	0.35299	0.306739	0.405957	0.163959	0.325147	0.206503	0.152886	0.187729	0.00932964	0.111293	0.213938	0.103532	0.446648	0.266925	0.179755	0.176906	0.254312	0.28339	0.287288	0.132419	0.232906	0.408127	0.360783	0.445235	0.217546	0.46846	0.33936	0.307074	0.367314	0.250028	0.344941	0.102026	0.280633	0.287425	0.0370766	0.159311	0.300939	0.230997	0.23139	0.211789	0.0712564	0.363535	0.441466	0.34082	0.34082	0.34082	0.34082	0.34082
	61.4481	0.358383	0.300922	0.407328	0.165971	0.332307	0.206798	0.150316	0.188021	0.00829346	0.10678	0.219007	0.103446	0.446194	0.265235	0.17971	0.180051	0.251191	0.2899	0.29616	0.141452	0.231576	0.407658	0.362599	0.447447	0.220837	0.46542	0.341779	0.314767	0.366179	0.254162	0.350478	0.105188	0.286884	0.294504	0.0444439	0.166191	0.299695	0.23415	0.230236	0.204122	0.0757491	0.370109	0.44319	0.341414	0.341414	0.341414	0.341414	0.341414
	61.8395	0.363189	0.294507	0.408328	0.168081	0.339038	0.207387	0.147782	0.188251	0.00926442	0.102319	0.224348	0.103299	0.445928	0.263614	0.179179	0.183312	0.247738	0.296078	0.304786	0.150573	0.230533	0.407205	0.364648	0.449977	0.22409	0.462432	0.344564	0.322308	0.364929	0.257773	0.35578	0.109501	0.292984	0.301305	0.0532781	0.172854	0.297983	0.237319	0.229683	0.196572	0.0816805	0.3763	0.444882	0.341618	0.341618	0.341618	0.341618	0.341618
	62.2309	0.367411	0.287512	0.408944	0.170282	0.345339	0.208285	0.14535	0.18841	0.0116582	0.0978783	0.229888	0.103118	0.445865	0.262068	0.178182	0.186593	0.243984	0.301917	0.313136	0.159751	0.229811	0.406784	0.366915	0.452739	0.227306	0.459507	0.347705	0.329676	0.36359	0.260871	0.360833	0.11472	0.298892	0.307789	0.0630286	0.179273	0.295798	0.240538	0.229729	0.189176	0.0886306	0.382073	0.446491	0.341416	0.341416	0.341416	0.341416	0.341416
	62.6223	0.371054	0.279966	0.409154	0.172558	0.35121	0.209472	0.143088	0.188479	0.0147005	0.0935427	0.235534	0.102893	0.445983	0.260599	0.176726	0.189803	0.23993	0.307399	0.321176	0.168946	0.22941	0.406399	0.369374	0.455645	0.230465	0.456655	0.351153	0.33684	0.362185	0.263455	0.365626	0.120572	0.304563	0.313913	0.073378	0.185429	0.293137	0.24379	0.230356	0.181998	0.096242	0.387393	0.447966	0.340776	0.340776	0.340776	0.340776	0.340776
	63.0137	0.374123	0.27193	0.408949	0.174891	0.356655	0.210936	0.14107	0.188453	0.0180266	0.0892655	0.241234	0.102645	0.446276	0.259197	0.174823	0.192839	0.235609	0.312517	0.32888	0.178128	0.229339	0.406058	0.37199	0.458603	0.233558	0.453879	0.354882	0.343757	0.360739	0.265552	0.37015	0.126802	0.309956	0.319631	0.084143	0.191314	0.289994	0.247117	0.231535	0.175076	0.104239	0.392235	0.449264	0.339674	0.339674	0.339674	0.339674	0.339674
	63.4051	0.376627	0.263448	0.408308	0.177264	0.361674	0.212668	0.139358	0.188319	0.0214363	0.085113	0.246915	0.102378	0.446723	0.257865	0.172483	0.195627	0.231036	0.31726	0.336225	0.187268	0.2296	0.405768	0.374739	0.461527	0.236575	0.451186	0.358849	0.350423	0.359278	0.267182	0.3744	0.133199	0.315044	0.324911	0.0952085	0.196929	0.286374	0.250494	0.233236	0.168479	0.112411	0.396577	0.450342	0.338099	0.338099	0.338099	0.338099	0.338099
	63.7965	0.378571	0.254588	0.407207	0.17965	0.366268	0.214627	0.138013	0.18807	0.0248482	0.0810803	0.252519	0.102089	0.447292	0.256583	0.169705	0.198071	0.226234	0.321614	0.343186	0.196332	0.230169	0.405526	0.377572	0.464323	0.239493	0.448573	0.363005	0.356785	0.357817	0.268378	0.37837	0.139547	0.319784	0.329697	0.106495	0.202286	0.282268	0.253942	0.235412	0.16226	0.120593	0.400399	0.451161	0.336021	0.336021	0.336021	0.336021	0.336021
	64.1879	0.379963	0.245393	0.405622	0.182032	0.370435	0.216807	0.137081	0.187701	0.0282263	0.0771774	0.257992	0.1018	0.447964	0.255347	0.166502	0.200111	0.221231	0.325576	0.349746	0.205299	0.231049	0.405345	0.380464	0.466908	0.242306	0.446041	0.367319	0.362844	0.356377	0.269176	0.382058	0.145703	0.324161	0.333962	0.117946	0.207398	0.277681	0.257448	0.238025	0.156485	0.128658	0.403685	0.451689	0.333445	0.333445	0.333445	0.333445	0.333445
	64.5793	0.380811	0.235906	0.403521	0.184378	0.374169	0.219152	0.136594	0.187206	0.0315108	0.0734614	0.263262	0.101491	0.448685	0.254136	0.162872	0.201681	0.216034	0.329128	0.355884	0.214133	0.232197	0.405219	0.383366	0.469195	0.244984	0.443583	0.371726	0.368563	0.354966	0.269606	0.38546	0.151503	0.328138	0.337661	0.129512	0.21228	0.272612	0.260992	0.241022	0.151219	0.136495	0.406422	0.45189	0.330349	0.330349	0.330349	0.330349	0.330349
	64.9706	0.381125	0.226161	0.400884	0.186668	0.377463	0.221649	0.136577	0.186584	0.0347119	0.0698947	0.26829	0.101182	0.449431	0.252943	0.158835	0.202736	0.210677	0.332271	0.361587	0.222815	0.233603	0.405158	0.386241	0.47111	0.247523	0.441195	0.376198	0.373926	0.353597	0.269712	0.388579	0.156848	0.331703	0.340772	0.141152	0.216941	0.267067	0.264578	0.244359	0.146514	0.144023	0.408602	0.451746	0.326747	0.326747	0.326747	0.326747	0.326747
	65.362	0.380915	0.21617	0.397688	0.188875	0.38031	0.224254	0.137036	0.18583	0.0377797	0.0665625	0.273009	0.100856	0.450147	0.251757	0.154408	0.203255	0.205158	0.334994	0.366841	0.231314	0.235221	0.405162	0.389053	0.472582	0.249903	0.43887	0.380676	0.378924	0.352276	0.269525	0.391412	0.161633	0.33484	0.343285	0.152827	0.221379	0.26106	0.268156	0.247987	0.142429	0.151166	0.41022	0.451234	0.322643	0.322643	0.322643	0.322643	0.322643
	65.7534	0.380196	0.205961	0.393925	0.190975	0.382704	0.226938	0.137977	0.184945	0.0407242	0.0634271	0.277387	0.100519	0.450797	0.250568	0.14962	0.203211	0.199501	0.337297	0.371633	0.239608	0.237023	0.405235	0.391759	0.47355	0.252113	0.4366	0.385122	0.383523	0.351011	0.269088	0.393962	0.165782	0.337539	0.345194	0.1645	0.225586	0.254608	0.271734	0.25186	0.138988	0.157873	0.411275	0.45035	0.318053	0.318053	0.318053	0.318053	0.318053
	66.1448	0.378983	0.195545	0.3896	0.192949	0.384642	0.229681	0.139394	0.183929	0.0435306	0.0605432	0.281386	0.100174	0.451338	0.249383	0.144515	0.20262	0.193713	0.339179	0.375957	0.247672	0.238975	0.405384	0.394332	0.473969	0.254157	0.434378	0.389494	0.387739	0.34981	0.268441	0.396232	0.169249	0.339805	0.346525	0.176137	0.229542	0.247745	0.27526	0.255939	0.136223	0.164111	0.411774	0.449096	0.313013	0.313013	0.313013	0.313013	0.313013
	66.5362	0.377297	0.18496	0.384719	0.194772	0.386125	0.232442	0.141276	0.182781	0.0461876	0.0579183	0.284976	0.0998085	0.451725	0.248194	0.139129	0.201476	0.1878	0.340639	0.379802	0.255479	0.241028	0.405605	0.396729	0.473799	0.256025	0.432192	0.393744	0.391534	0.348678	0.267628	0.398223	0.171977	0.341635	0.347296	0.187705	0.233223	0.240502	0.278726	0.260177	0.134124	0.16986	0.411726	0.447482	0.307547	0.307547	0.307547	0.307547	0.307547
	66.9276	0.375158	0.174246	0.379308	0.196431	0.387157	0.235222	0.143609	0.181507	0.0487199	0.0555423	0.288156	0.0994414	0.451931	0.247014	0.133521	0.199799	0.181786	0.341686	0.383168	0.263012	0.24316	0.405907	0.398933	0.473019	0.257734	0.430034	0.397847	0.394924	0.347627	0.2667	0.399939	0.173967	0.343052	0.347554	0.199172	0.236603	0.232932	0.282098	0.264537	0.132676	0.175123	0.411148	0.445536	0.301716	0.301716	0.301716	0.301716	0.301716
	67.319	0.372589	0.163462	0.373386	0.197905	0.387743	0.237978	0.146367	0.180104	0.0510998	0.0534723	0.290904	0.0990529	0.451909	0.245845	0.12773	0.197602	0.175669	0.342318	0.386048	0.270244	0.245317	0.406279	0.400908	0.471613	0.259281	0.427892	0.401751	0.397892	0.346661	0.265703	0.401385	0.175194	0.344063	0.347332	0.210507	0.239662	0.225087	0.285343	0.268975	0.13184	0.17991	0.410058	0.443288	0.295557	0.295557	0.295557	0.295557	0.295557
	67.7104	0.369611	0.152688	0.366983	0.199181	0.387894	0.24071	0.149521	0.17858	0.0533657	0.0516529	0.293233	0.0986629	0.45164	0.244696	0.121805	0.194895	0.169485	0.342545	0.388443	0.277159	0.247478	0.406722	0.402637	0.469579	0.260685	0.425754	0.40544	0.400433	0.345787	0.264701	0.402564	0.175684	0.344695	0.346674	0.221682	0.242385	0.217031	0.288452	0.273451	0.131556	0.184246	0.408481	0.44078	0.289142	0.289142	0.289142	0.289142	0.289142
	68.1018	0.366247	0.142003	0.360119	0.200243	0.387617	0.243386	0.153027	0.176935	0.055495	0.0501501	0.295133	0.0982573	0.451086	0.243572	0.115789	0.1917	0.163238	0.342367	0.390352	0.283733	0.249595	0.407223	0.404103	0.466924	0.261952	0.423605	0.408873	0.402558	0.345006	0.26374	0.40348	0.175456	0.34497	0.345622	0.232668	0.244768	0.208835	0.291367	0.277922	0.131761	0.188157	0.406439	0.438057	0.282533	0.282533	0.282533	0.282533	0.282533
	68.4931	0.362517	0.131511	0.352812	0.201076	0.38692	0.245982	0.156836	0.175175	0.0575046	0.0489193	0.29661	0.0978382	0.450228	0.24247	0.109713	0.188019	0.156959	0.341792	0.391777	0.289949	0.25164	0.40777	0.405284	0.463658	0.263088	0.42143	0.412028	0.40424	0.344314	0.262881	0.404137	0.174553	0.344908	0.344196	0.243435	0.246818	0.200569	0.294089	0.282344	0.132368	0.191668	0.40396	0.435172	0.275798	0.275798	0.275798	0.275798	0.275798
	68.8845	0.358438	0.121301	0.345082	0.201671	0.385808	0.24848	0.160893	0.173302	0.0593951	0.0479849	0.297669	0.0974052	0.449042	0.241396	0.103622	0.183882	0.150671	0.340823	0.392721	0.29579	0.25358	0.408352	0.406182	0.459804	0.264107	0.419214	0.414883	0.405505	0.343704	0.262173	0.404539	0.173045	0.344542	0.342437	0.253957	0.248548	0.192321	0.296555	0.28668	0.133306	0.194803	0.401069	0.432176	0.269025	0.269025	0.269025	0.269025	0.269025
	69.2759	0.354028	0.111482	0.33694	0.202009	0.384283	0.250833	0.165136	0.171322	0.0611462	0.0473572	0.298297	0.0969368	0.447499	0.24034	0.0975475	0.179306	0.144389	0.339462	0.393186	0.301235	0.255374	0.408945	0.406776	0.455382	0.265004	0.416938	0.417409	0.406326	0.343155	0.261658	0.404689	0.170992	0.343886	0.340356	0.264202	0.249978	0.184175	0.298746	0.290884	0.134482	0.197576	0.397789	0.429121	0.262282	0.262282	0.262282	0.262282	0.262282
	69.6673	0.349302	0.102155	0.328409	0.202084	0.382344	0.25303	0.16951	0.169239	0.0627806	0.0470023	0.298512	0.096441	0.445593	0.239304	0.0915431	0.174331	0.13815	0.337718	0.393182	0.306275	0.257005	0.40954	0.407076	0.450425	0.265792	0.414589	0.419601	0.406718	0.342651	0.261377	0.404589	0.168512	0.342975	0.337989	0.274142	0.251125	0.176236	0.300618	0.294927	0.135828	0.200002	0.394147	0.426061	0.255672	0.255672	0.255672	0.255672	0.255672
	70.0587	0.344274	0.0934339	0.319512	0.201881	0.37999	0.25502	0.173954	0.167056	0.0642592	0.0469787	0.2983	0.0958848	0.443293	0.23828	0.0856639	0.169011	0.131957	0.335592	0.392711	0.310889	0.258428	0.41011	0.407073	0.444965	0.266465	0.41215	0.421428	0.406674	0.342159	0.261349	0.40424	0.1657	0.341826	0.335358	0.283746	0.252004	0.168609	0.30212	0.298772	0.137271	0.20209	0.390163	0.423043	0.249273	0.249273	0.249273	0.249273	0.249273
	70.4501	0.338959	0.0854513	0.310285	0.201398	0.377217	0.256787	0.178423	0.164779	0.065607	0.0472262	0.297681	0.0952715	0.4406	0.237267	0.0799788	0.163399	0.125848	0.333097	0.391785	0.315069	0.259632	0.410644	0.406774	0.439047	0.267034	0.40961	0.422893	0.406188	0.341653	0.261597	0.403645	0.162712	0.340472	0.332499	0.292987	0.252622	0.161417	0.303233	0.302396	0.138752	0.203851	0.385863	0.42012	0.243189	0.243189	0.243189	0.243189	0.243189
	70.8415	0.333371	0.0783466	0.300777	0.200629	0.374026	0.258301	0.182873	0.162411	0.0668018	0.0477997	0.296668	0.0945767	0.437495	0.236269	0.0745785	0.157586	0.119827	0.330239	0.390412	0.318801	0.260582	0.411121	0.406192	0.432721	0.267504	0.406956	0.423975	0.40528	0.3411	0.26212	0.402802	0.159697	0.338942	0.329461	0.301834	0.252976	0.154794	0.30389	0.305776	0.140224	0.205303	0.381267	0.417336	0.237513	0.237513	0.237513	0.237513	0.237513
	71.2329	0.327527	0.0722985	0.291041	0.199572	0.370418	0.25954	0.187269	0.159958	0.0678508	0.0486651	0.29528	0.0937892	0.433983	0.235285	0.0695504	0.151641	0.113919	0.327032	0.388604	0.322073	0.261265	0.411525	0.405327	0.426042	0.267882	0.404179	0.424675	0.403926	0.340467	0.262917	0.401713	0.156834	0.33726	0.326287	0.310262	0.253059	0.148875	0.304083	0.308895	0.141637	0.206466	0.3764	0.414738	0.232337	0.232337	0.232337	0.232337	0.232337
	71.6243	0.321443	0.0674696	0.28115	0.198233	0.366398	0.260503	0.19158	0.157423	0.0687704	0.0498219	0.293562	0.0929056	0.430067	0.234331	0.065005	0.14567	0.108145	0.323492	0.386374	0.324881	0.261666	0.411845	0.404207	0.41908	0.26819	0.401274	0.424992	0.402158	0.33973	0.263976	0.400376	0.154327	0.335469	0.323048	0.318248	0.252855	0.143808	0.303757	0.311742	0.142965	0.207376	0.371285	0.412369	0.227759	0.227759	0.227759	0.227759	0.227759
	72.0157	0.315134	0.0640215	0.271168	0.196613	0.361975	0.261163	0.195777	0.154808	0.0695468	0.0512884	0.291537	0.091902	0.425751	0.233409	0.0610401	0.13976	0.102519	0.31963	0.383734	0.327211	0.261767	0.412057	0.402836	0.411905	0.268435	0.398236	0.424917	0.39996	0.338859	0.265274	0.39879	0.152363	0.33359	0.319793	0.325767	0.252351	0.139719	0.302898	0.314301	0.144166	0.208068	0.365947	0.410267	0.223846	0.223846	0.223846	0.223846	0.223846
	72.407	0.308616	0.0620327	0.261172	0.194726	0.357162	0.26154	0.199835	0.152122	0.0702238	0.053004	0.289267	0.0907909	0.421063	0.232538	0.05775	0.134011	0.0970799	0.31547	0.380701	0.329064	0.261574	0.412154	0.401246	0.404598	0.268645	0.395064	0.424468	0.397349	0.337837	0.266796	0.396953	0.15116	0.331666	0.316592	0.332805	0.251534	0.13673	0.301485	0.316568	0.145219	0.208591	0.360409	0.40847	0.22068	0.22068	0.22068	0.22068	0.22068
	72.7984	0.301904	0.0614908	0.25123	0.19258	0.351971	0.261612	0.203725	0.149363	0.0707839	0.0550155	0.286786	0.0895483	0.416012	0.231723	0.0552154	0.128521	0.0918417	0.311022	0.377288	0.330431	0.261068	0.41211	0.399452	0.397243	0.268828	0.391755	0.423635	0.394332	0.336644	0.268505	0.394861	0.150881	0.329719	0.313496	0.339341	0.250402	0.13492	0.299488	0.318524	0.146085	0.208986	0.354694	0.407003	0.218298	0.218298	0.218298	0.218298	0.218298
	73.1898	0.295011	0.0622646	0.241408	0.190188	0.346417	0.261389	0.207417	0.146539	0.0712636	0.0572492	0.284146	0.0881851	0.41064	0.230974	0.0534787	0.123372	0.0868567	0.306309	0.373513	0.331311	0.260268	0.411912	0.397478	0.389924	0.269008	0.38831	0.42244	0.390903	0.335266	0.270383	0.392514	0.151694	0.327779	0.310549	0.345363	0.248959	0.134332	0.296916	0.320163	0.146735	0.209297	0.348826	0.40589	0.216735	0.216735	0.216735	0.216735	0.216735
	73.5812	0.287947	0.0641335	0.231777	0.187566	0.340514	0.260865	0.21088	0.14365	0.071664	0.0597281	0.281395	0.0866902	0.404965	0.230299	0.0525651	0.118666	0.0821498	0.301345	0.369393	0.331702	0.259164	0.411538	0.395356	0.382728	0.269197	0.384731	0.420883	0.387088	0.333688	0.272391	0.389905	0.153688	0.325869	0.307793	0.350856	0.24722	0.134961	0.293729	0.321471	0.147141	0.209559	0.34282	0.405137	0.215992	0.215992	0.215992	0.215992	0.215992
	73.9726	0.280718	0.0668497	0.222396	0.184726	0.334271	0.260027	0.214082	0.1407	0.0719875	0.0624215	0.278566	0.085058	0.399028	0.229693	0.0524532	0.114468	0.0777736	0.296148	0.364942	0.331602	0.257773	0.410967	0.393102	0.375735	0.269398	0.381019	0.41898	0.382867	0.331895	0.274501	0.387032	0.156916	0.324	0.305242	0.35581	0.245209	0.136751	0.289947	0.322433	0.147266	0.209794	0.336695	0.404748	0.216048	0.216048	0.216048	0.216048	0.216048
	74.364	0.273331	0.070156	0.213343	0.181692	0.3277	0.258882	0.216995	0.137692	0.0722606	0.0652954	0.275716	0.0832942	0.392866	0.229161	0.0530984	0.11086	0.073771	0.290737	0.360182	0.331016	0.256104	0.410184	0.390755	0.369023	0.269626	0.377179	0.416746	0.37827	0.329875	0.276678	0.38389	0.161364	0.32219	0.302919	0.360212	0.24295	0.139609	0.28554	0.323045	0.147095	0.21002	0.330464	0.404707	0.216866	0.216866	0.216866	0.216866	0.216866
	74.7554	0.265788	0.0738495	0.204693	0.178475	0.320806	0.257399	0.219589	0.134628	0.0724591	0.0683758	0.272872	0.081377	0.386509	0.228689	0.054436	0.107888	0.0701827	0.285125	0.355126	0.329941	0.254163	0.409163	0.38833	0.362659	0.26987	0.373213	0.414187	0.373285	0.327605	0.278882	0.380474	0.166955	0.320433	0.300817	0.364053	0.240474	0.143406	0.280511	0.323295	0.1466	0.210233	0.324134	0.404991	0.218371	0.218371	0.218371	0.218371	0.218371
	75.1468	0.258093	0.0777459	0.19654	0.175104	0.313599	0.25559	0.221848	0.131511	0.0726196	0.0715881	0.270093	0.0793207	0.380006	0.228278	0.056377	0.105589	0.0670632	0.279337	0.349797	0.328386	0.25198	0.407896	0.385862	0.356708	0.270139	0.369128	0.41133	0.367923	0.325074	0.281079	0.376778	0.173589	0.318738	0.298944	0.367324	0.2378	0.148001	0.274859	0.323187	0.145786	0.210433	0.317716	0.405566	0.220499	0.220499	0.220499	0.220499	0.220499
	75.5382	0.250246	0.0817175	0.188985	0.171599	0.306085	0.253436	0.223752	0.128342	0.0727253	0.0749749	0.267425	0.0771038	0.373385	0.227916	0.0588403	0.103973	0.0644346	0.273389	0.344209	0.326353	0.249557	0.406362	0.383372	0.35122	0.270422	0.364933	0.408177	0.362199	0.322261	0.283219	0.372797	0.181101	0.317093	0.29729	0.370017	0.234947	0.153239	0.268566	0.322719	0.14465	0.210608	0.311211	0.406382	0.223142	0.223142	0.223142	0.223142	0.223142
	75.9296	0.242253	0.0856502	0.182133	0.16799	0.298275	0.250943	0.225293	0.125125	0.0727993	0.0784716	0.264919	0.074736	0.366698	0.227596	0.0617305	0.103014	0.0623428	0.267308	0.338384	0.323848	0.246932	0.404555	0.380883	0.346237	0.270718	0.360638	0.40476	0.356104	0.319152	0.285268	0.368527	0.189346	0.315493	0.29585	0.372129	0.231922	0.158975	0.26166	0.321904	0.143215	0.210748	0.304628	0.407391	0.226217	0.226217	0.226217	0.226217	0.226217
	76.3209	0.234116	0.0894562	0.176094	0.164309	0.290184	0.24812	0.226465	0.12186	0.0728603	0.0820809	0.262646	0.0722146	0.359978	0.227318	0.0649639	0.102674	0.0607878	0.261116	0.33234	0.320884	0.244118	0.402467	0.378425	0.341792	0.271027	0.356257	0.401085	0.34967	0.315737	0.287178	0.363961	0.198133	0.313928	0.294628	0.373656	0.228724	0.165066	0.254121	0.320756	0.141514	0.210847	0.297968	0.408532	0.229614	0.229614	0.229614	0.229614	0.229614
	76.7123	0.225841	0.0930657	0.170961	0.160588	0.281829	0.244968	0.227263	0.118549	0.0729073	0.085788	0.260652	0.0695383	0.353276	0.227074	0.0684636	0.102868	0.059783	0.25484	0.326095	0.317463	0.241153	0.400094	0.376008	0.337904	0.271341	0.351802	0.397176	0.342885	0.312009	0.28891	0.359096	0.207301	0.31238	0.29361	0.374601	0.225348	0.171386	0.245989	0.319288	0.139585	0.2109	0.291238	0.409747	0.233237	0.233237	0.233237	0.233237	0.233237
	77.1037	0.217435	0.0964102	0.166809	0.15687	0.273232	0.241524	0.227685	0.115197	0.0729872	0.0895343	0.259012	0.0667286	0.346637	0.226871	0.0721548	0.103518	0.0593051	0.248512	0.319673	0.313602	0.238069	0.397437	0.373663	0.334585	0.271668	0.347292	0.393054	0.335781	0.307971	0.290432	0.353929	0.216681	0.310845	0.292807	0.374968	0.221785	0.177826	0.237269	0.317524	0.137488	0.210914	0.284445	0.410975	0.236999	0.236999	0.236999	0.236999	0.236999
	77.4951	0.208906	0.0994525	0.163686	0.153191	0.264419	0.237786	0.227725	0.111803	0.0730866	0.0933482	0.257764	0.0637793	0.340103	0.2267	0.075988	0.10451	0.0593221	0.242157	0.313089	0.309308	0.234897	0.394491	0.371397	0.33183	0.271996	0.342741	0.38873	0.328361	0.303627	0.291706	0.348454	0.226112	0.309297	0.292205	0.374763	0.218028	0.184288	0.227993	0.31548	0.135272	0.21089	0.277596	0.412157	0.240804	0.240804	0.240804	0.240804	0.240804
	77.8865	0.200261	0.10215	0.161602	0.149597	0.255417	0.233793	0.227378	0.108371	0.0732433	0.0971433	0.256955	0.0607239	0.33373	0.22657	0.0799118	0.105738	0.0597937	0.235811	0.306365	0.304597	0.231691	0.391265	0.369231	0.329627	0.272337	0.338171	0.384237	0.320639	0.298996	0.292718	0.342673	0.235464	0.307729	0.291803	0.373999	0.214074	0.190698	0.218203	0.31318	0.133014	0.21084	0.270703	0.41324	0.244589	0.244589	0.244589	0.244589	0.244589
	78.2779	0.191508	0.104495	0.160543	0.146129	0.246253	0.229554	0.226635	0.104902	0.0734521	0.100946	0.256618	0.0575652	0.327551	0.226474	0.083901	0.107089	0.0606517	0.229497	0.299518	0.299482	0.228477	0.387753	0.367175	0.327949	0.272678	0.333596	0.379578	0.312642	0.294091	0.293442	0.336583	0.244588	0.306117	0.291583	0.372684	0.20993	0.196987	0.207914	0.31064	0.130771	0.210765	0.263776	0.41417	0.248271	0.248271	0.248271	0.248271	0.248271
	78.6693	0.182655	0.106486	0.160461	0.142832	0.236955	0.225082	0.225485	0.101399	0.0737101	0.104699	0.256757	0.0543316	0.321622	0.226408	0.0879357	0.108446	0.0618506	0.223251	0.292567	0.293975	0.225319	0.383965	0.365235	0.326759	0.273017	0.329034	0.374784	0.304365	0.288935	0.293875	0.330187	0.253384	0.304442	0.291517	0.370833	0.205607	0.203109	0.197193	0.30788	0.128623	0.210666	0.256831	0.4149	0.251803	0.251803	0.251803	0.251803	0.251803
	79.0607	0.173712	0.108141	0.161295	0.13975	0.22755	0.2204	0.223922	0.097864	0.0740297	0.108383	0.257391	0.0510454	0.31597	0.226367	0.092005	0.109712	0.0633116	0.217099	0.285532	0.288098	0.222247	0.379902	0.363424	0.326011	0.273346	0.324501	0.369865	0.295849	0.283551	0.294008	0.323485	0.26173	0.302685	0.291583	0.368461	0.201125	0.209022	0.18605	0.304922	0.126642	0.210532	0.24988	0.415384	0.255129	0.255129	0.255129	0.255129	0.255129
	79.4521	0.164685	0.109496	0.162972	0.13692	0.218062	0.215497	0.221935	0.0942992	0.0743723	0.112003	0.258501	0.0477233	0.310634	0.226335	0.0961127	0.110776	0.064992	0.211071	0.278426	0.28186	0.219317	0.375567	0.361733	0.325647	0.273644	0.32001	0.364838	0.287087	0.277957	0.293838	0.316482	0.269543	0.300812	0.291725	0.365581	0.196508	0.214694	0.174549	0.301783	0.124903	0.210344	0.24294	0.41558	0.258207	0.258207	0.258207	0.258207	0.258207
	79.8434	0.155585	0.110584	0.165411	0.134386	0.208517	0.2104	0.219526	0.0907096	0.0747551	0.115493	0.260084	0.0444099	0.305639	0.226306	0.100252	0.111565	0.0668274	0.205198	0.271271	0.275285	0.216571	0.370973	0.360176	0.325605	0.273903	0.315576	0.359724	0.278113	0.272177	0.29337	0.309183	0.276734	0.298809	0.291911	0.362209	0.191774	0.220101	0.162718	0.298495	0.123494	0.210078	0.236027	0.415448	0.261009	0.261009	0.261009	0.261009	0.261009
	80.2348	0.146425	0.111461	0.168535	0.132177	0.19894	0.205096	0.216692	0.0870946	0.0751404	0.118894	0.26212	0.0411223	0.300999	0.226257	0.104429	0.111993	0.0687768	0.199506	0.264078	0.268386	0.214047	0.366125	0.358737	0.325813	0.274094	0.311211	0.354524	0.268944	0.266225	0.292598	0.301595	0.283223	0.29664	0.292079	0.35836	0.186946	0.225219	0.150596	0.295082	0.122486	0.2097	0.229159	0.414948	0.263498	0.263498	0.263498	0.263498	0.263498
	80.6262	0.137223	0.112157	0.172254	0.130327	0.189358	0.199608	0.213443	0.0834614	0.0755275	0.122136	0.264585	0.0379241	0.296733	0.226178	0.108635	0.11201	0.0708022	0.194029	0.256867	0.261186	0.211796	0.361043	0.357419	0.326201	0.274205	0.306926	0.349267	0.259593	0.260122	0.29153	0.29373	0.288958	0.294288	0.292192	0.354053	0.182032	0.230034	0.138241	0.291582	0.121968	0.209181	0.22236	0.414046	0.265669	0.265669	0.265669	0.265669	0.265669
	81.0176	0.128003	0.11272	0.176488	0.128856	0.179803	0.193947	0.209789	0.0798102	0.07591	0.125243	0.267464	0.0348596	0.29283	0.226054	0.11286	0.111576	0.0728605	0.188791	0.249653	0.253705	0.209836	0.35574	0.356212	0.326695	0.274212	0.302733	0.343949	0.250104	0.253882	0.29016	0.285597	0.293864	0.291726	0.292205	0.349308	0.177036	0.234529	0.125675	0.28803	0.121999	0.208492	0.215649	0.412709	0.267498	0.267498	0.267498	0.267498	0.267498
	81.409	0.118795	0.113175	0.181147	0.127783	0.17031	0.188124	0.205744	0.0761468	0.0762602	0.128186	0.270715	0.0320135	0.289298	0.225873	0.117092	0.110663	0.0749359	0.183827	0.24245	0.245959	0.208216	0.350242	0.355102	0.327225	0.274099	0.29864	0.338592	0.240479	0.247528	0.288494	0.277213	0.29791	0.288936	0.292082	0.344144	0.171951	0.238694	0.112976	0.284468	0.122648	0.207611	0.209057	0.410912	0.268995	0.268995	0.268995	0.268995	0.268995
	81.8004	0.109642	0.113546	0.186143	0.127118	0.160922	0.182178	0.201323	0.0724752	0.0765965	0.130936	0.274316	0.0294822	0.286116	0.225633	0.121305	0.109278	0.0769851	0.179164	0.235275	0.237977	0.206944	0.344574	0.354087	0.327724	0.273856	0.294659	0.3332	0.230774	0.241082	0.286535	0.268596	0.301044	0.285909	0.291808	0.338588	0.166764	0.242525	0.100174	0.28094	0.123952	0.206529	0.202612	0.408632	0.27016	0.27016	0.27016	0.27016	0.27016
	82.1918	0.100599	0.113855	0.191393	0.126859	0.151686	0.176114	0.196539	0.0687984	0.0768783	0.133518	0.278214	0.0273776	0.283272	0.225322	0.125482	0.107416	0.0789996	0.174829	0.22814	0.229773	0.20605	0.338762	0.353144	0.328133	0.273465	0.290797	0.327782	0.221002	0.234569	0.284288	0.259766	0.303245	0.282628	0.291355	0.332661	0.161461	0.246017	0.0873492	0.277485	0.125933	0.205239	0.196352	0.405858	0.27101	0.27101	0.27101	0.27101	0.27101
	82.5832	0.0917411	0.114111	0.196812	0.127002	0.142657	0.169975	0.191406	0.0651241	0.0771153	0.135861	0.282359	0.0258426	0.280743	0.22495	0.129593	0.105116	0.080945	0.17085	0.221063	0.221376	0.205541	0.33284	0.352272	0.328401	0.272929	0.287061	0.322354	0.21121	0.228025	0.281771	0.250749	0.304494	0.279098	0.290728	0.326394	0.156024	0.249178	0.0745646	0.274148	0.128595	0.203749	0.190316	0.402586	0.271574	0.271574	0.271574	0.271574	0.271574
	82.9746	0.0831666	0.114342	0.202334	0.127528	0.133897	0.16377	0.185933	0.0614539	0.0772785	0.138012	0.286698	0.0249812	0.2785	0.22451	0.133624	0.102403	0.0828067	0.167245	0.214054	0.212807	0.20542	0.326834	0.351446	0.328484	0.272233	0.283456	0.316911	0.201438	0.22148	0.278993	0.241575	0.304773	0.27531	0.289911	0.319813	0.150444	0.252015	0.0618988	0.27096	0.131909	0.202062	0.184545	0.398819	0.271872	0.271872	0.271872	0.271872	0.271872
	83.3659	0.0750104	0.114559	0.207897	0.128418	0.12547	0.15752	0.180129	0.0577969	0.0773431	0.13991	0.291157	0.0248903	0.276524	0.224011	0.137555	0.0993268	0.0845691	0.164039	0.207129	0.204088	0.205694	0.320782	0.350662	0.328352	0.271382	0.279987	0.311476	0.191715	0.214976	0.275984	0.232279	0.3041	0.271274	0.288904	0.312945	0.14472	0.254546	0.0494785	0.267958	0.135842	0.200187	0.179086	0.394573	0.271955	0.271955	0.271955	0.271955	0.271955
	83.7573	0.0674567	0.114796	0.213459	0.129638	0.117452	0.151242	0.174003	0.0541563	0.0773042	0.141574	0.295683	0.0255585	0.274771	0.223453	0.141371	0.0959468	0.0862087	0.161238	0.200299	0.195247	0.206338	0.314709	0.349905	0.327976	0.270369	0.276652	0.306042	0.182107	0.208549	0.272763	0.2229	0.302464	0.266994	0.287697	0.305819	0.138856	0.256786	0.0374559	0.265167	0.140325	0.198125	0.173984	0.389865	0.271849	0.271849	0.271849	0.271849	0.271849
	84.1487	0.0607571	0.115079	0.21899	0.131155	0.109924	0.144929	0.167562	0.0505398	0.0771113	0.143002	0.300201	0.0269372	0.273224	0.222838	0.145065	0.0923285	0.0877297	0.158856	0.193575	0.186305	0.207354	0.308651	0.349158	0.32734	0.269188	0.27345	0.300628	0.172638	0.202236	0.269361	0.213485	0.299904	0.262477	0.28627	0.29846	0.132869	0.258759	0.0262449	0.262609	0.145294	0.195868	0.169285	0.384723	0.27161	0.27161	0.27161	0.27161	0.27161
	84.5401	0.0552408	0.11544	0.224467	0.13293	0.102973	0.138601	0.160819	0.0469548	0.0767733	0.144161	0.304661	0.0289013	0.271835	0.222169	0.148622	0.0885745	0.0891099	0.15689	0.186972	0.177292	0.208703	0.302638	0.348418	0.326435	0.26784	0.270375	0.295233	0.163384	0.19607	0.265809	0.204087	0.296432	0.257739	0.284614	0.290895	0.12678	0.260483	0.0170149	0.260307	0.150657	0.193409	0.165029	0.379174	0.271275	0.271275	0.271275	0.271275	0.271275
	84.9315	0.0512987	0.115914	0.229886	0.134917	0.0966984	0.132241	0.15379	0.0434067	0.076249	0.145104	0.309007	0.0313311	0.27058	0.221439	0.152038	0.0847876	0.0903627	0.15534	0.180497	0.168232	0.210369	0.296699	0.347664	0.325252	0.26631	0.267422	0.289865	0.154387	0.190081	0.262128	0.194766	0.29209	0.252782	0.282692	0.283147	0.120616	0.261978	0.0137132	0.25827	0.156325	0.190725	0.161255	0.373251	0.27089	0.27089	0.27089	0.27089	0.27089
	85.3229	0.0493044	0.116517	0.235232	0.13708	0.0912014	0.125866	0.146496	0.0399074	0.0755393	0.145774	0.313188	0.0341104	0.269419	0.220654	0.155292	0.0811263	0.0914801	0.154196	0.174164	0.159154	0.212313	0.290871	0.346896	0.323793	0.264603	0.264581	0.284537	0.145716	0.184295	0.258352	0.185592	0.28692	0.247631	0.280492	0.275242	0.1144	0.263262	0.0190226	0.256514	0.1622	0.187801	0.157993	0.366987	0.270503	0.270503	0.270503	0.270503	0.270503
	85.7143	0.0494759	0.117275	0.240504	0.139368	0.0865861	0.119473	0.138961	0.0364629	0.0746401	0.146234	0.317174	0.037135	0.268314	0.219804	0.158368	0.0777584	0.0924698	0.153441	0.167983	0.150089	0.214497	0.285182	0.346097	0.322059	0.262704	0.261842	0.279247	0.137448	0.178728	0.254495	0.176645	0.280959	0.242292	0.277983	0.267203	0.108154	0.264344	0.0280655	0.255043	0.168182	0.184617	0.155263	0.360416	0.270145	0.270145	0.270145	0.270145	0.270145
	86.1057	0.0517599	0.118179	0.245688	0.141745	0.0829489	0.113069	0.131215	0.0330879	0.0735329	0.14645	0.320916	0.0403416	0.267239	0.218896	0.161242	0.0748965	0.0933422	0.153062	0.161964	0.141064	0.216889	0.279671	0.345264	0.32006	0.260621	0.259194	0.274015	0.129642	0.1734	0.250585	0.168017	0.274279	0.236795	0.275154	0.259053	0.101894	0.265236	0.0379156	0.253865	0.17418	0.181163	0.15308	0.353575	0.269867	0.269867	0.269867	0.269867	0.269867
	86.4971	0.055855	0.119225	0.250771	0.144168	0.0803649	0.106678	0.123289	0.0297941	0.0722459	0.146443	0.32439	0.0436531	0.266148	0.217931	0.163882	0.0727646	0.0940914	0.153032	0.15612	0.13212	0.219435	0.274366	0.34439	0.317807	0.258352	0.256627	0.26884	0.122405	0.168322	0.246633	0.159811	0.266922	0.231161	0.272003	0.250819	0.0956318	0.265941	0.0478012	0.252978	0.180098	0.177438	0.151439	0.346498	0.26969	0.26969	0.26969	0.26969	0.26969
	86.8885	0.0613473	0.120383	0.255737	0.146602	0.0788755	0.100297	0.115213	0.0265997	0.0707525	0.146235	0.327553	0.0470413	0.265024	0.216916	0.166266	0.0715761	0.0947369	0.153334	0.150461	0.123287	0.222108	0.269306	0.343465	0.315318	0.255905	0.254129	0.263743	0.115796	0.163504	0.24266	0.152143	0.258973	0.225417	0.268525	0.242524	0.0893786	0.266464	0.0574317	0.252375	0.185865	0.173448	0.150334	0.339228	0.269655	0.269655	0.269655	0.269655	0.269655
	87.2798	0.0678381	0.121612	0.260564	0.149017	0.0784766	0.0939616	0.10702	0.0235289	0.0690814	0.145791	0.330372	0.0504554	0.263827	0.215865	0.168358	0.0715197	0.0952647	0.153937	0.144999	0.114612	0.224853	0.264519	0.342496	0.312616	0.253297	0.251692	0.258732	0.109926	0.158958	0.238685	0.14514	0.250499	0.219604	0.264747	0.234192	0.0831476	0.266806	0.066694	0.252048	0.191406	0.169213	0.149739	0.331806	0.269784	0.269784	0.269784	0.269784	0.269784
	87.6712	0.0750044	0.12287	0.265235	0.15138	0.0791166	0.0876684	0.0987371	0.0206112	0.067221	0.145176	0.332816	0.0538779	0.262543	0.214787	0.170139	0.0726916	0.0956882	0.15482	0.139744	0.10614	0.227643	0.260034	0.341468	0.309729	0.250539	0.249305	0.253822	0.104858	0.154691	0.234722	0.138937	0.241586	0.213752	0.260674	0.225848	0.0769654	0.266967	0.0755198	0.251974	0.19667	0.164754	0.149623	0.324282	0.270098	0.270098	0.270098	0.270098	0.270098
	88.0626	0.0826023	0.124101	0.269732	0.153672	0.0807022	0.0814393	0.0903961	0.0178961	0.0651735	0.144337	0.334838	0.057288	0.261153	0.213709	0.171587	0.0751224	0.0959992	0.155957	0.134711	0.0979248	0.230434	0.255879	0.340394	0.306695	0.247663	0.246959	0.249036	0.100671	0.150713	0.230798	0.133672	0.232337	0.207912	0.256341	0.217514	0.0708761	0.266954	0.0838508	0.252133	0.201611	0.160101	0.149945	0.316707	0.270618	0.270618	0.270618	0.270618	0.270618
	88.454	0.0904545	0.125264	0.274045	0.155867	0.0831124	0.0752783	0.08203	0.0154482	0.0629557	0.143333	0.33642	0.060666	0.259641	0.212642	0.172691	0.078728	0.0961963	0.157321	0.129909	0.0900353	0.233194	0.252068	0.339265	0.30355	0.244685	0.244646	0.244383	0.0974144	0.14703	0.22693	0.129476	0.222841	0.202119	0.251758	0.20921	0.0649517	0.266763	0.0916797	0.252487	0.206193	0.155281	0.150658	0.309133	0.271343	0.271343	0.271343	0.271343	0.271343
	88.8454	0.0984312	0.126312	0.278167	0.157955	0.0862144	0.0691816	0.0736791	0.0133724	0.0605465	0.142146	0.337519	0.0640181	0.25801	0.211612	0.173446	0.083381	0.0962877	0.158891	0.12535	0.0825444	0.2359	0.248621	0.338087	0.300338	0.241638	0.242359	0.239897	0.0950977	0.143648	0.223147	0.126461	0.213229	0.196425	0.246944	0.200956	0.0592999	0.266402	0.0989608	0.252999	0.210392	0.150317	0.15171	0.301621	0.272288	0.272288	0.272288	0.272288	0.272288
	89.2368	0.106437	0.12722	0.282097	0.159916	0.0898763	0.063166	0.0654012	0.0118052	0.0579833	0.14079	0.338125	0.0673241	0.256246	0.210635	0.173843	0.088899	0.0962621	0.160639	0.121047	0.0755537	0.238514	0.245539	0.336867	0.297102	0.238547	0.240088	0.235586	0.0937257	0.140566	0.219467	0.124705	0.203605	0.190872	0.241911	0.192768	0.0540665	0.26587	0.105712	0.253626	0.214175	0.145233	0.153045	0.294224	0.273435	0.273435	0.273435	0.273435	0.273435
	89.6282	0.114398	0.127964	0.285839	0.161742	0.0939767	0.0572156	0.0572763	0.0109053	0.0552533	0.139307	0.338219	0.0706014	0.254366	0.209727	0.173887	0.0950947	0.0961414	0.162548	0.117008	0.0691754	0.24103	0.242827	0.3356	0.293886	0.235437	0.237825	0.231485	0.0932235	0.137781	0.215913	0.124244	0.194115	0.185502	0.23665	0.184658	0.0494416	0.265168	0.111913	0.254317	0.217525	0.140045	0.154611	0.286998	0.27478	0.27478	0.27478	0.27478	0.27478
	90.0196	0.122258	0.128533	0.289389	0.163423	0.0984081	0.0513605	0.0494335	0.0107714	0.0523939	0.137663	0.337792	0.0738393	0.252364	0.208904	0.17357	0.101786	0.095919	0.164591	0.113246	0.0635508	0.243413	0.240479	0.334303	0.290731	0.232343	0.235565	0.227611	0.0935334	0.135285	0.212505	0.12506	0.184888	0.180363	0.231172	0.176641	0.045645	0.264295	0.11758	0.255029	0.220406	0.134775	0.156349	0.279994	0.276295	0.276295	0.276295	0.276295	0.276295
	90.411	0.12997	0.128925	0.292753	0.16495	0.103079	0.0456069	0.0420756	0.0113656	0.0494331	0.135933	0.336852	0.0770465	0.250258	0.208173	0.172892	0.10879	0.0956166	0.16675	0.109768	0.0588409	0.245661	0.238482	0.332967	0.287674	0.22928	0.233297	0.22399	0.0945244	0.133062	0.209252	0.12709	0.176072	0.175484	0.225459	0.168725	0.0429028	0.26324	0.12273	0.255708	0.222795	0.129445	0.158208	0.273257	0.277951	0.277951	0.277951	0.277951	0.277951
	90.8024	0.137494	0.129127	0.295918	0.166324	0.107911	0.0400044	0.0355393	0.0125252	0.0463981	0.134078	0.335393	0.0802286	0.248054	0.207548	0.171841	0.115958	0.0952434	0.169005	0.106587	0.055207	0.247752	0.236826	0.331611	0.284749	0.226286	0.231019	0.22065	0.0960892	0.131094	0.206171	0.130225	0.167823	0.170911	0.21952	0.16092	0.0413958	0.261998	0.127366	0.256316	0.224661	0.124088	0.160136	0.266827	0.279718	0.279718	0.279718	0.279718	0.279718
	91.1937	0.144796	0.129139	0.298876	0.167535	0.112839	0.0346257	0.0303705	0.0140562	0.0433642	0.13215	0.333435	0.0833772	0.245759	0.207032	0.170405	0.123135	0.0948073	0.171336	0.103705	0.0527994	0.249677	0.235485	0.33023	0.281979	0.223381	0.228722	0.217606	0.0980927	0.129354	0.203258	0.134329	0.160281	0.166666	0.213355	0.153236	0.0411987	0.260551	0.131531	0.256805	0.225973	0.118749	0.162085	0.260735	0.281545	0.281545	0.281545	0.281545	0.281545
	91.5851	0.151845	0.128938	0.301609	0.168589	0.11781	0.0295842	0.0273268	0.0158056	0.0403659	0.130149	0.330976	0.0865104	0.243395	0.206635	0.168578	0.130204	0.0943308	0.173731	0.101132	0.0516989	0.251432	0.234445	0.328832	0.279386	0.2206	0.226407	0.214892	0.100406	0.127818	0.200523	0.139251	0.153608	0.162785	0.206974	0.145679	0.0422525	0.258886	0.135222	0.25714	0.226717	0.113488	0.164012	0.255007	0.2834	0.2834	0.2834	0.2834	0.2834
	91.9765	0.158611	0.128503	0.304092	0.169487	0.122779	0.025103	0.0270731	0.0176637	0.0375072	0.128071	0.32803	0.0896124	0.240961	0.206361	0.166346	0.137049	0.0938071	0.176172	0.0988694	0.0518998	0.252998	0.233674	0.327426	0.276984	0.217971	0.22407	0.212515	0.102926	0.126455	0.197962	0.144836	0.14792	0.159285	0.200408	0.13826	0.0443834	0.256984	0.138488	0.257287	0.226868	0.108382	0.165873	0.24966	0.285226	0.285226	0.285226	0.285226	0.285226
	92.3679	0.165072	0.127806	0.306304	0.170234	0.127714	0.0215047	0.0295953	0.0195655	0.0348703	0.125962	0.324608	0.0927006	0.238483	0.206219	0.163712	0.143578	0.0932584	0.17865	0.096918	0.0532976	0.254386	0.233153	0.326009	0.27478	0.215527	0.221714	0.210505	0.105528	0.12524	0.195573	0.150934	0.143344	0.156184	0.193676	0.130984	0.0473671	0.25483	0.141336	0.25721	0.226434	0.10352	0.167637	0.244706	0.286986	0.286986	0.286986	0.286986	0.286986
	92.7593	0.171204	0.126811	0.308221	0.170841	0.132589	0.0193047	0.034194	0.0214633	0.0325718	0.123774	0.320711	0.0957707	0.235966	0.206218	0.160673	0.149721	0.0926747	0.181152	0.0952781	0.0557078	0.255578	0.232851	0.324596	0.272778	0.213305	0.21934	0.208868	0.108147	0.12415	0.193361	0.15741	0.139944	0.153495	0.186823	0.123859	0.0509837	0.252411	0.143802	0.256883	0.225414	0.0990096	0.169269	0.240149	0.288632	0.288632	0.288632	0.288632	0.288632
	93.1507	0.176991	0.1255	0.309829	0.171318	0.137385	0.0189589	0.0400758	0.0233316	0.0307683	0.121572	0.316363	0.0988288	0.233433	0.206362	0.157244	0.155406	0.0920643	0.183673	0.0939417	0.0589246	0.256587	0.232741	0.323178	0.270976	0.211332	0.216954	0.207616	0.11068	0.123162	0.191319	0.164138	0.137756	0.151215	0.179875	0.11689	0.0550436	0.249715	0.145922	0.256269	0.223831	0.0949615	0.170747	0.235992	0.290121	0.290121	0.290121	0.290121	0.290121
	93.5421	0.182418	0.123848	0.311113	0.171681	0.142092	0.0205711	0.0466774	0.02515	0.0295866	0.119314	0.311568	0.101891	0.230899	0.206666	0.153446	0.160596	0.0914288	0.186205	0.0929042	0.0627382	0.257408	0.232795	0.321771	0.269371	0.209646	0.214562	0.206759	0.113083	0.122264	0.189459	0.171011	0.136763	0.149348	0.172872	0.110082	0.0593957	0.246742	0.147711	0.255342	0.22171	0.0914963	0.172051	0.23223	0.291421	0.291421	0.291421	0.291421	0.291421
	93.9335	0.187474	0.121863	0.312068	0.171943	0.146704	0.0237284	0.0536639	0.0269061	0.0291984	0.117032	0.306359	0.104953	0.228383	0.207127	0.1493	0.165238	0.0907611	0.188741	0.0921509	0.0669713	0.258047	0.23298	0.32037	0.26795	0.208268	0.212169	0.206287	0.115292	0.121441	0.187775	0.177931	0.136889	0.147871	0.165843	0.103439	0.0639142	0.243488	0.14923	0.254068	0.219079	0.0887279	0.173168	0.228851	0.292487	0.292487	0.292487	0.292487	0.292487
	94.3248	0.192153	0.119556	0.312698	0.172122	0.151219	0.0279258	0.060838	0.0285932	0.0296893	0.114736	0.300762	0.108044	0.225912	0.207756	0.144842	0.169303	0.0900787	0.191278	0.0916697	0.0714802	0.258518	0.233269	0.31898	0.266703	0.207225	0.209782	0.206208	0.117262	0.120691	0.186278	0.184817	0.138036	0.146771	0.158806	0.0969625	0.0684932	0.239962	0.15049	0.252418	0.215977	0.0867585	0.174091	0.225844	0.293298	0.293298	0.293298	0.293298	0.293298
	94.7162	0.196448	0.116963	0.313	0.172233	0.155636	0.0327659	0.0680788	0.0302031	0.031091	0.112406	0.294813	0.111157	0.223496	0.208547	0.140099	0.172754	0.0893707	0.193806	0.091442	0.0761464	0.258819	0.233628	0.317606	0.265611	0.206531	0.207408	0.206496	0.118972	0.120005	0.184971	0.191597	0.140045	0.146015	0.15179	0.0906595	0.073038	0.23617	0.151556	0.250366	0.212422	0.0856705	0.174817	0.223189	0.293814	0.293814	0.293814	0.293814	0.293814
	95.1076	0.200355	0.11413	0.312984	0.172293	0.159956	0.0380093	0.0753092	0.0317362	0.0333776	0.110103	0.288564	0.114315	0.221169	0.209495	0.135111	0.175555	0.0886607	0.196322	0.0914479	0.0808881	0.258974	0.23403	0.31624	0.264652	0.206192	0.205052	0.207149	0.120372	0.119381	0.183854	0.198211	0.142774	0.145568	0.1448	0.0845339	0.077461	0.232125	0.152452	0.247887	0.208449	0.0855085	0.175348	0.220863	0.294014	0.294014	0.294014	0.294014	0.294014
	95.499	0.203869	0.111102	0.312644	0.172319	0.164178	0.0435169	0.0824699	0.033187	0.036428	0.10778	0.282053	0.117523	0.218935	0.210593	0.129912	0.177679	0.0879486	0.198814	0.0916672	0.0856334	0.258981	0.234444	0.314893	0.263803	0.206215	0.20272	0.208134	0.121467	0.118816	0.182934	0.204605	0.146043	0.145393	0.137867	0.0785964	0.0816861	0.227844	0.153224	0.244966	0.204066	0.0862849	0.175689	0.218836	0.293871	0.293871	0.293871	0.293871	0.293871
	95.8904	0.206988	0.107934	0.311982	0.172322	0.168299	0.0491825	0.0895185	0.0345577	0.0401557	0.105505	0.275346	0.120782	0.216818	0.21182	0.124543	0.179088	0.0872488	0.201276	0.0920743	0.0903348	0.25886	0.234844	0.313552	0.26303	0.206583	0.200416	0.20943	0.122217	0.118305	0.182202	0.210736	0.149705	0.14544	0.131006	0.0728625	0.0856448	0.223338	0.153914	0.241586	0.199292	0.0879636	0.175848	0.217079	0.293358	0.293358	0.293358	0.293358	0.293358
	96.2818	0.209706	0.104662	0.310988	0.172322	0.172316	0.0549616	0.0964166	0.0358471	0.0444329	0.103253	0.268484	0.124108	0.214825	0.213163	0.119054	0.179769	0.0865766	0.203698	0.092649	0.0949538	0.258617	0.23521	0.312224	0.262304	0.207294	0.198146	0.211007	0.12263	0.117842	0.181663	0.216564	0.15361	0.14567	0.124259	0.067355	0.089285	0.218631	0.154537	0.237748	0.194136	0.0904794	0.175834	0.215554	0.292464	0.292464	0.292464	0.292464	0.292464
	96.6732	0.21202	0.101322	0.309649	0.172328	0.176226	0.060787	0.103134	0.0370558	0.0491686	0.101048	0.261528	0.127488	0.21296	0.214596	0.113499	0.179696	0.0859294	0.206069	0.093364	0.0994584	0.258259	0.235518	0.3109	0.261587	0.20832	0.195911	0.212823	0.122695	0.117419	0.181304	0.222058	0.157625	0.14603	0.117671	0.0621099	0.0925674	0.21374	0.155143	0.233449	0.188605	0.093735	0.175658	0.214221	0.291159	0.291159	0.291159	0.291159	0.291159
	97.0646	0.213927	0.0979379	0.307959	0.172356	0.180024	0.0666415	0.109645	0.0381874	0.0542999	0.098925	0.25453	0.130939	0.211234	0.216101	0.107959	0.178875	0.0853292	0.208382	0.0941986	0.103832	0.257801	0.235759	0.309577	0.260843	0.209645	0.193719	0.214855	0.122406	0.117031	0.181124	0.22719	0.161646	0.146481	0.111298	0.0571743	0.0954687	0.208693	0.155724	0.228695	0.182719	0.0976209	0.175332	0.213043	0.289445	0.289445	0.289445	0.289445	0.289445
	97.456	0.215426	0.0945277	0.305902	0.172417	0.18371	0.0724875	0.115931	0.0392406	0.0597446	0.0968534	0.247537	0.134449	0.209632	0.217652	0.10252	0.177314	0.0847623	0.210622	0.0951286	0.108051	0.257238	0.235917	0.308256	0.260036	0.21124	0.191573	0.217049	0.121785	0.116669	0.181116	0.231938	0.165566	0.146979	0.10522	0.0526157	0.0979795	0.20352	0.156315	0.223495	0.176487	0.102024	0.174868	0.21198	0.287305	0.287305	0.287305	0.287305	0.287305
	97.8474	0.216518	0.0911229	0.303482	0.172521	0.187284	0.0783085	0.12198	0.0402215	0.0654891	0.09491	0.240616	0.138025	0.208163	0.21923	0.0973058	0.175035	0.0842424	0.212787	0.0961321	0.112111	0.256591	0.235989	0.306922	0.259133	0.213079	0.189476	0.219381	0.120818	0.116332	0.181273	0.236284	0.169321	0.147487	0.0995077	0.0485205	0.100099	0.198259	0.156906	0.217856	0.169944	0.106834	0.174281	0.210996	0.284743	0.284743	0.284743	0.284743	0.284743
	98.2387	0.217207	0.0877545	0.300698	0.172683	0.190748	0.0840989	0.127782	0.0411296	0.0714769	0.0930576	0.23381	0.141671	0.206809	0.220817	0.0924543	0.172082	0.0837593	0.214865	0.0971902	0.115998	0.255851	0.235971	0.305582	0.258103	0.215139	0.187434	0.221802	0.119546	0.116019	0.181598	0.240212	0.172836	0.147979	0.0942645	0.0449976	0.101833	0.192959	0.157497	0.211792	0.163112	0.111955	0.173586	0.210058	0.281765	0.281765	0.281765	0.281765	0.281765
	98.6301	0.2175	0.0844885	0.297565	0.172906	0.194108	0.0898343	0.133334	0.04197	0.0777039	0.0913632	0.227196	0.145379	0.20557	0.222393	0.0881306	0.168492	0.0833096	0.21685	0.0982809	0.119707	0.255033	0.235859	0.30422	0.25692	0.217388	0.185449	0.224277	0.117964	0.115734	0.182083	0.243713	0.176073	0.148419	0.0895745	0.0421771	0.103187	0.187671	0.158091	0.205306	0.156032	0.117297	0.172801	0.209139	0.278375	0.278375	0.278375	0.278375	0.278375
	99.0215	0.217408	0.0813979	0.294102	0.173204	0.197369	0.0955271	0.138635	0.0427454	0.0841536	0.089841	0.220836	0.149167	0.204434	0.223949	0.0845202	0.16433	0.0828977	0.218735	0.0993896	0.123238	0.254138	0.235658	0.302841	0.255568	0.219808	0.183524	0.226772	0.116109	0.115488	0.182739	0.24678	0.178995	0.148798	0.085539	0.0401926	0.104166	0.182466	0.158659	0.198411	0.148739	0.122791	0.171945	0.208219	0.274601	0.274601	0.274601	0.274601	0.274601
	99.4129	0.216941	0.0785809	0.290332	0.173576	0.200537	0.101149	0.143683	0.0434579	0.0908047	0.0885082	0.214803	0.153018	0.20339	0.225464	0.0818065	0.159644	0.0825077	0.220512	0.100496	0.126583	0.253168	0.235363	0.301434	0.25403	0.222366	0.181658	0.229242	0.114003	0.115288	0.18356	0.24941	0.181577	0.149089	0.0822455	0.0391644	0.104769	0.177411	0.159212	0.191115	0.141263	0.128369	0.171036	0.207282	0.270448	0.270448	0.270448	0.270448	0.270448
	99.8043	0.216112	0.0761419	0.286284	0.174026	0.203616	0.106702	0.148477	0.0441136	0.0976729	0.0874446	0.209179	0.156949	0.202436	0.226929	0.0801709	0.154502	0.0821562	0.222179	0.101589	0.129749	0.252137	0.234983	0.299995	0.2523	0.225045	0.179852	0.231667	0.111667	0.115152	0.184554	0.251601	0.183818	0.149288	0.0797659	0.0391626	0.10499	0.172587	0.159709	0.183431	0.133643	0.133976	0.170097	0.20632	0.265952	0.265952	0.265952	0.265952	0.265952
	100.196	0.214934	0.0741683	0.281975	0.174552	0.206608	0.112163	0.153008	0.0447123	0.10472	0.086628	0.204028	0.160948	0.201552	0.228326	0.0797438	0.14897	0.081829	0.223721	0.10265	0.132732	0.251034	0.234514	0.298525	0.250373	0.227814	0.178102	0.233999	0.109151	0.115089	0.185724	0.253356	0.185705	0.149382	0.0781632	0.0401868	0.104824	0.168076	0.160156	0.175377	0.125892	0.139557	0.169145	0.205328	0.261128	0.261128	0.261128	0.261128	0.261128
	100.587	0.213419	0.0727372	0.277427	0.175148	0.209511	0.117506	0.157273	0.0452611	0.111965	0.0861509	0.199427	0.165011	0.200739	0.229637	0.0806069	0.143115	0.0815414	0.225137	0.103669	0.135535	0.249877	0.233963	0.297011	0.248251	0.23065	0.176402	0.236223	0.106466	0.115112	0.187064	0.254681	0.187262	0.149364	0.0774502	0.0421662	0.10426	0.163962	0.160521	0.166972	0.118041	0.145059	0.168204	0.204306	0.256004	0.256004	0.256004	0.256004	0.256004
	100.978	0.211577	0.071874	0.272651	0.17581	0.212321	0.122719	0.161257	0.0457603	0.119372	0.0860021	0.195425	0.169136	0.199976	0.230845	0.0827572	0.137029	0.0812928	0.226412	0.104633	0.138161	0.248654	0.233332	0.29546	0.245939	0.23353	0.174748	0.238299	0.103675	0.115228	0.188578	0.255583	0.188487	0.149233	0.07763	0.0449779	0.103299	0.160329	0.160787	0.158249	0.110094	0.150433	0.167286	0.203255	0.250613	0.250613	0.250613	0.250613	0.250613
	101.37	0.20942	0.0715769	0.267656	0.176523	0.215032	0.127753	0.164953	0.0462147	0.126932	0.0862146	0.192067	0.1733	0.199255	0.231926	0.0861261	0.130793	0.0810839	0.227541	0.105529	0.140611	0.24737	0.232626	0.293857	0.243438	0.236423	0.173129	0.240209	0.100798	0.11544	0.190249	0.256072	0.189413	0.148981	0.0786441	0.0484831	0.101944	0.157248	0.160944	0.149238	0.102072	0.155624	0.16641	0.202179	0.244973	0.244973	0.244973	0.244973	0.244973
	101.761	0.206958	0.0718065	0.262448	0.17728	0.217636	0.132602	0.168348	0.0466275	0.134631	0.0868216	0.189381	0.177507	0.19856	0.232862	0.0905883	0.124533	0.0809271	0.228515	0.106352	0.142892	0.246023	0.231855	0.292208	0.24076	0.239314	0.171539	0.24193	0.0978906	0.115749	0.192076	0.25616	0.190058	0.148615	0.0804272	0.0525454	0.100211	0.154791	0.160949	0.13998	0.0939926	0.16059	0.165584	0.20108	0.239128	0.239128	0.239128	0.239128	0.239128
	102.153	0.204201	0.0725008	0.257034	0.178063	0.220125	0.137222	0.171433	0.0469996	0.142426	0.0877774	0.187371	0.181725	0.19787	0.233627	0.0959828	0.11837	0.0808065	0.229323	0.107089	0.145004	0.244601	0.231025	0.290505	0.237912	0.242173	0.169965	0.243433	0.0950009	0.116149	0.194036	0.255861	0.190446	0.148129	0.0828768	0.0570452	0.0981244	0.153008	0.160803	0.130515	0.0858845	0.165284	0.164818	0.199962	0.2331	0.2331	0.2331	0.2331	0.2331
	102.544	0.201161	0.073605	0.251428	0.178859	0.222492	0.141603	0.174205	0.047337	0.15032	0.0891354	0.186042	0.185952	0.197174	0.234206	0.102147	0.112462	0.0807354	0.229963	0.107735	0.146954	0.243108	0.230153	0.288744	0.234906	0.244989	0.168401	0.244714	0.0921682	0.116635	0.196116	0.255191	0.190616	0.147535	0.0858888	0.0618847	0.0957191	0.151938	0.160455	0.120884	0.0778059	0.169674	0.164115	0.19883	0.226937	0.226937	0.226937	0.226937	0.226937
	102.935	0.197853	0.0750574	0.245648	0.179655	0.224733	0.145728	0.176658	0.0476384	0.158259	0.0908245	0.185368	0.19017	0.196442	0.234581	0.108913	0.106979	0.0806919	0.230427	0.108283	0.148744	0.241524	0.229246	0.28693	0.231757	0.247743	0.166835	0.245743	0.0894659	0.1172	0.1983	0.254166	0.190585	0.146837	0.089363	0.0669814	0.0930376	0.151598	0.1599	0.111132	0.0698316	0.173734	0.163475	0.197688	0.220676	0.220676	0.220676	0.220676	0.220676
	103.327	0.194294	0.0768225	0.239721	0.180433	0.226844	0.149577	0.178798	0.0479097	0.166242	0.0928576	0.185331	0.194359	0.195671	0.234741	0.116141	0.102097	0.0806765	0.230715	0.108728	0.150379	0.239855	0.228323	0.285052	0.228483	0.250428	0.165261	0.246521	0.0869231	0.117839	0.200565	0.252806	0.190397	0.146046	0.0931944	0.0722715	0.0901235	0.151985	0.159104	0.101297	0.0621027	0.177443	0.162899	0.196545	0.214362	0.214362	0.214362	0.214362	0.214362
	103.718	0.190501	0.078866	0.23368	0.181182	0.228823	0.153157	0.180626	0.0481505	0.17423	0.0952051	0.185891	0.198521	0.194831	0.234681	0.1237	0.0980081	0.0806764	0.230826	0.109067	0.151866	0.238082	0.227396	0.283121	0.225109	0.253042	0.16367	0.247029	0.0846201	0.118547	0.202901	0.25113	0.190072	0.145181	0.0973111	0.0777012	0.0870232	0.153079	0.158043	0.0914281	0.0548141	0.180798	0.162381	0.195408	0.208049	0.208049	0.208049	0.208049	0.208049
	104.11	0.186496	0.0811579	0.227557	0.181884	0.230669	0.156439	0.182147	0.0483635	0.182202	0.0978071	0.187003	0.202624	0.193918	0.234394	0.131485	0.0948664	0.080675	0.230761	0.109294	0.153203	0.236204	0.226475	0.281126	0.221659	0.255578	0.162055	0.247264	0.082588	0.119323	0.205284	0.249159	0.189649	0.144251	0.101628	0.0832277	0.0837778	0.154835	0.156715	0.0815734	0.048285	0.18379	0.161918	0.194293	0.201777	0.201777	0.201777	0.201777	0.201777
	104.501	0.182298	0.0836709	0.22139	0.182529	0.23238	0.159433	0.183366	0.0485512	0.190145	0.100683	0.188625	0.206672	0.192921	0.233886	0.139408	0.0928152	0.0806759	0.230523	0.109411	0.154401	0.234216	0.225576	0.279075	0.218168	0.258049	0.160409	0.247225	0.0808877	0.12017	0.207706	0.246917	0.189158	0.143283	0.106096	0.0888163	0.0804256	0.1572	0.155086	0.0717963	0.0429689	0.186422	0.161503	0.193213	0.19561	0.19561	0.19561	0.19561	0.19561
	104.892	0.177928	0.0863544	0.215202	0.183098	0.233952	0.162111	0.184282	0.0487126	0.198011	0.103734	0.190687	0.210639	0.191827	0.233155	0.147395	0.0919179	0.0806549	0.230115	0.109412	0.155458	0.232106	0.2247	0.276968	0.214668	0.260451	0.158725	0.246903	0.0795576	0.121088	0.210148	0.244426	0.188623	0.142286	0.110654	0.0944357	0.0769998	0.160104	0.153179	0.0621867	0.0394692	0.188692	0.16113	0.192187	0.189587	0.189587	0.189587	0.189587	0.189587
	105.284	0.173404	0.0891625	0.209015	0.183579	0.235381	0.16446	0.184898	0.0488523	0.205804	0.106972	0.193134	0.214512	0.190644	0.232208	0.155388	0.0921869	0.0806248	0.229543	0.109298	0.156383	0.229881	0.22386	0.274802	0.211199	0.262798	0.156995	0.24631	0.07862	0.122081	0.212596	0.241711	0.188086	0.141285	0.115255	0.100062	0.0735293	0.163473	0.15097	0.0528718	0.0383813	0.190597	0.160792	0.191235	0.183767	0.183767	0.183767	0.183767	0.183767
	105.675	0.168744	0.0920273	0.20284	0.183957	0.236656	0.166466	0.185206	0.0489672	0.213463	0.110324	0.195887	0.218277	0.189357	0.231047	0.163327	0.0935526	0.0805697	0.228806	0.109069	0.157175	0.227523	0.223052	0.272588	0.207796	0.265092	0.155213	0.245436	0.0781121	0.12315	0.215036	0.238794	0.187557	0.140293	0.119856	0.105672	0.0700435	0.167226	0.148483	0.0440698	0.0399785	0.19213	0.16048	0.190373	0.178191	0.178191	0.178191	0.178191	0.178191
	106.067	0.163962	0.0948879	0.196679	0.184216	0.237767	0.168092	0.185203	0.0490612	0.220981	0.113742	0.198873	0.221902	0.187978	0.229675	0.171168	0.0958833	0.0804968	0.227913	0.108721	0.157839	0.225041	0.222282	0.270315	0.204496	0.267339	0.15337	0.244299	0.0780148	0.124294	0.217442	0.235702	0.187076	0.139322	0.124403	0.111243	0.0665697	0.171281	0.145723	0.036145	0.044036	0.193277	0.160188	0.189623	0.1729	0.1729	0.1729	0.1729	0.1729
	106.458	0.159072	0.0976891	0.190536	0.184345	0.238703	0.169335	0.184882	0.0491328	0.22831	0.117215	0.202022	0.225383	0.186495	0.228095	0.178857	0.0990143	0.0804073	0.226865	0.108259	0.158378	0.22242	0.221548	0.267998	0.201333	0.269544	0.151461	0.242897	0.0783468	0.125506	0.2198	0.232456	0.186647	0.13839	0.128862	0.116756	0.0631409	0.175558	0.142695	0.0297502	0.05	0.194024	0.159904	0.188997	0.167941	0.167941	0.167941	0.167941	0.167941
	106.849	0.154088	0.100382	0.184408	0.184327	0.239452	0.170159	0.184237	0.049182	0.235413	0.120639	0.205251	0.228681	0.184912	0.226302	0.186349	0.102741	0.0802923	0.225668	0.10768	0.158792	0.219661	0.220849	0.265626	0.198335	0.271704	0.149477	0.241241	0.0790632	0.126776	0.222079	0.229082	0.186293	0.137495	0.13318	0.122188	0.0597912	0.179975	0.139433	0.025913	0.057318	0.194355	0.159618	0.188506	0.163336	0.163336	0.163336	0.163336	0.163336
	107.241	0.149022	0.102947	0.178304	0.184152	0.240003	0.170567	0.183268	0.0492107	0.242269	0.124035	0.208508	0.231789	0.183226	0.224305	0.1936	0.106879	0.0801652	0.224329	0.106989	0.159086	0.216761	0.220188	0.263208	0.195529	0.273828	0.147415	0.239346	0.0801498	0.128092	0.224257	0.2256	0.18602	0.136654	0.137332	0.127521	0.0565598	0.184457	0.135925	0.0256078	0.0655465	0.194256	0.159319	0.188157	0.159129	0.159129	0.159129	0.159129	0.159129
	107.632	0.14389	0.105369	0.172232	0.18381	0.240348	0.170547	0.181975	0.0492156	0.248815	0.127309	0.211723	0.234681	0.181428	0.222101	0.200562	0.111232	0.080004	0.222853	0.106185	0.159258	0.213706	0.219559	0.260743	0.192932	0.275906	0.14527	0.237215	0.0815595	0.129436	0.226306	0.222032	0.185827	0.135863	0.141283	0.132732	0.0534873	0.188927	0.132212	0.0287353	0.0743897	0.193719	0.158993	0.187951	0.15533	0.15533	0.15533	0.15533	0.15533
	108.023	0.138707	0.107663	0.166213	0.183293	0.240482	0.1701	0.180366	0.0492	0.25505	0.130455	0.214854	0.23734	0.179524	0.219699	0.207205	0.115644	0.079819	0.221254	0.105272	0.159313	0.210504	0.21897	0.258227	0.190561	0.277948	0.143042	0.234875	0.083244	0.130793	0.228199	0.2184	0.185721	0.135132	0.145015	0.137802	0.0506131	0.193317	0.128292	0.0341582	0.0836229	0.192743	0.158629	0.187888	0.151966	0.151966	0.151966	0.151966	0.151966
	108.415	0.133491	0.109843	0.160269	0.182597	0.240402	0.169245	0.17845	0.0491602	0.260916	0.133443	0.217861	0.239758	0.177497	0.217109	0.213494	0.119969	0.0795896	0.219538	0.104255	0.159251	0.207138	0.218413	0.255669	0.188424	0.279949	0.14073	0.232327	0.0851711	0.132148	0.229917	0.21472	0.18568	0.134459	0.148524	0.142712	0.0479749	0.197561	0.124193	0.0407783	0.0930929	0.191334	0.158212	0.187959	0.149043	0.149043	0.149043	0.149043	0.149043
	108.806	0.128262	0.111931	0.15442	0.181715	0.240109	0.167974	0.176239	0.049098	0.266405	0.136212	0.220702	0.24191	0.175358	0.214345	0.219412	0.124088	0.0793111	0.217723	0.103136	0.159071	0.203619	0.217891	0.253058	0.186526	0.281914	0.138335	0.2296	0.0872714	0.133487	0.231432	0.211011	0.185709	0.133844	0.1518	0.147442	0.045601	0.201599	0.119943	0.0479336	0.102671	0.189503	0.157734	0.188161	0.146564	0.146564	0.146564	0.146564	0.146564
	109.198	0.123037	0.113947	0.148688	0.180652	0.239603	0.166324	0.173747	0.0490123	0.27149	0.138796	0.223359	0.243802	0.1731	0.21143	0.224944	0.127915	0.0789778	0.215819	0.101922	0.158779	0.199939	0.217402	0.250406	0.18487	0.283847	0.135863	0.226706	0.0895276	0.134805	0.232737	0.207287	0.185781	0.133295	0.154861	0.151978	0.0435131	0.205382	0.115554	0.0552595	0.112253	0.187274	0.157181	0.188484	0.144528	0.144528	0.144528	0.144528	0.144528
	109.589	0.117836	0.115894	0.143078	0.179401	0.238884	0.164286	0.170984	0.0489013	0.27614	0.141107	0.225792	0.245408	0.17073	0.208383	0.230085	0.131366	0.0785707	0.213843	0.100615	0.158368	0.196103	0.216939	0.247703	0.183451	0.285748	0.133318	0.223664	0.0918728	0.136096	0.233812	0.203562	0.185888	0.132803	0.157704	0.156303	0.0417188	0.208865	0.111087	0.0625618	0.121759	0.184664	0.15655	0.188922	0.142912	0.142912	0.142912	0.142912	0.142912
	109.98	0.112675	0.117774	0.137593	0.177968	0.237952	0.161884	0.167961	0.0487673	0.280361	0.143182	0.227985	0.246728	0.168259	0.205236	0.234834	0.134397	0.0781016	0.21181	0.0992234	0.157845	0.192119	0.216499	0.244954	0.182266	0.287627	0.130706	0.220501	0.0942903	0.137361	0.234654	0.199849	0.186011	0.132378	0.160349	0.160405	0.0402164	0.212016	0.106556	0.0697234	0.13111	0.181697	0.155834	0.189467	0.141707	0.141707	0.141707	0.141707	0.141707
	110.372	0.107567	0.119562	0.132224	0.176353	0.236806	0.159123	0.164684	0.0486058	0.284105	0.144967	0.229907	0.247751	0.165686	0.202011	0.239186	0.136946	0.0775504	0.20973	0.0977499	0.157207	0.187985	0.216068	0.242159	0.181302	0.289477	0.128032	0.217227	0.0967375	0.138601	0.235255	0.196155	0.186128	0.132006	0.162796	0.16427	0.0389913	0.214807	0.102029	0.0766671	0.140256	0.178393	0.155032	0.190113	0.140869	0.140869	0.140869	0.140869	0.140869
	110.763	0.102524	0.121237	0.126954	0.174558	0.235443	0.156002	0.161159	0.0484201	0.287388	0.146447	0.231531	0.248459	0.163037	0.19874	0.243145	0.138987	0.0769348	0.20762	0.0962004	0.156454	0.18372	0.215641	0.23931	0.180549	0.291304	0.125305	0.213878	0.0991847	0.139818	0.235607	0.192489	0.186233	0.131691	0.165048	0.167887	0.0380212	0.217222	0.0975415	0.0833431	0.149143	0.174767	0.154145	0.190856	0.140371	0.140371	0.140371	0.140371	0.140371
	111.155	0.0975541	0.122767	0.121775	0.172588	0.233859	0.152548	0.157388	0.0482066	0.290168	0.147632	0.23284	0.248856	0.160307	0.195446	0.246702	0.140479	0.0762488	0.205487	0.0945811	0.155589	0.179319	0.215201	0.236417	0.179988	0.293099	0.122529	0.21046	0.101622	0.141012	0.235711	0.188854	0.186293	0.131423	0.167107	0.171245	0.0372793	0.219248	0.0931396	0.0897038	0.157737	0.170837	0.153174	0.191688	0.140166	0.140166	0.140166	0.140166	0.140166
	111.546	0.0926645	0.124121	0.116671	0.170443	0.23205	0.148751	0.153376	0.0479662	0.292443	0.148454	0.233803	0.248916	0.157521	0.192153	0.249852	0.141392	0.0755005	0.203344	0.092895	0.154608	0.174803	0.21474	0.233464	0.179599	0.294853	0.119712	0.207006	0.104005	0.14218	0.235552	0.185256	0.186305	0.131193	0.168958	0.174332	0.0367367	0.220878	0.0888842	0.0957198	0.166	0.166611	0.152125	0.192603	0.140205	0.140205	0.140205	0.140205	0.140205
	111.937	0.0878623	0.125282	0.111646	0.168133	0.230016	0.144652	0.14913	0.0476988	0.294201	0.148965	0.234415	0.248649	0.154677	0.188884	0.252584	0.141708	0.0747024	0.201197	0.0911508	0.153515	0.170175	0.214247	0.230462	0.179358	0.296558	0.116861	0.20353	0.106347	0.143316	0.235134	0.181692	0.186241	0.130995	0.170606	0.177137	0.0363704	0.222108	0.0847911	0.10136	0.173897	0.162107	0.150999	0.19359	0.140448	0.140448	0.140448	0.140448	0.140448
	112.329	0.0831549	0.126232	0.10671	0.165659	0.227755	0.140262	0.144658	0.0474018	0.295412	0.149095	0.234655	0.248037	0.151785	0.185653	0.254889	0.141399	0.0738456	0.199053	0.0893512	0.152306	0.165444	0.213709	0.227399	0.179235	0.298191	0.113981	0.200052	0.108606	0.144408	0.234443	0.178163	0.186087	0.130811	0.172036	0.179647	0.0361632	0.222932	0.0809248	0.106604	0.181395	0.15734	0.149802	0.194636	0.140833	0.140833	0.140833	0.140833	0.140833
	112.72	0.0785514	0.126976	0.10188	0.163031	0.225273	0.135625	0.139976	0.0470785	0.296096	0.148882	0.234525	0.247083	0.148853	0.182485	0.256765	0.140471	0.0729511	0.196922	0.0875049	0.150985	0.160627	0.213124	0.224275	0.179199	0.299742	0.111084	0.196597	0.110794	0.145446	0.233478	0.174663	0.185828	0.130639	0.173259	0.181857	0.0361124	0.223353	0.0772939	0.111441	0.188442	0.152339	0.148536	0.195727	0.141328	0.141328	0.141328	0.141328	0.141328
	113.112	0.074062	0.127515	0.0971817	0.16026	0.222577	0.130788	0.135102	0.0467248	0.296215	0.148313	0.234025	0.245793	0.145875	0.179392	0.258208	0.138918	0.0720008	0.194806	0.0856171	0.149552	0.155724	0.212481	0.22109	0.179215	0.301182	0.108176	0.193172	0.112893	0.146413	0.232237	0.171188	0.185436	0.13046	0.174279	0.183754	0.0362266	0.223365	0.0739376	0.115861	0.194997	0.147139	0.147204	0.196842	0.141876	0.141876	0.141876	0.141876	0.141876
	113.503	0.0696986	0.127864	0.0926359	0.157355	0.219678	0.125789	0.13006	0.0463441	0.295801	0.147371	0.233154	0.244161	0.142869	0.176394	0.25923	0.136768	0.0710077	0.192717	0.0836941	0.148006	0.150763	0.211785	0.217833	0.179251	0.302501	0.105271	0.189809	0.114896	0.147298	0.230715	0.16773	0.184905	0.130272	0.175112	0.185334	0.0365309	0.222972	0.0708847	0.11987	0.201	0.141786	0.145812	0.197965	0.142449	0.142449	0.142449	0.142449	0.142449
	113.894	0.0654725	0.128032	0.0882647	0.154332	0.216587	0.120703	0.124872	0.0459345	0.294838	0.146113	0.231927	0.24221	0.139824	0.173509	0.259842	0.134054	0.0699603	0.190656	0.0817447	0.146352	0.145747	0.211027	0.214514	0.179269	0.303677	0.10238	0.186508	0.116816	0.148093	0.228928	0.164281	0.184205	0.130066	0.17579	0.186592	0.0370622	0.222176	0.0681391	0.123472	0.206401	0.136342	0.14436	0.199073	0.143008	0.143008	0.143008	0.143008	0.143008
	114.286	0.0613948	0.128014	0.0840749	0.1512	0.213318	0.115567	0.119561	0.0454964	0.293341	0.144483	0.230343	0.239932	0.136761	0.170756	0.260068	0.130818	0.0688542	0.188632	0.0797726	0.144586	0.140702	0.210208	0.211117	0.179239	0.304694	0.0995158	0.183295	0.118631	0.148792	0.226876	0.160833	0.183333	0.129837	0.176333	0.187525	0.0378675	0.220986	0.0657456	0.12668	0.211147	0.130874	0.142855	0.200151	0.143524	0.143524	0.143524	0.143524	0.143524
	114.677	0.057474	0.127807	0.0800708	0.147979	0.209884	0.110461	0.114148	0.045032	0.291336	0.142559	0.228417	0.23735	0.133681	0.168157	0.259932	0.127131	0.0676958	0.186646	0.0777877	0.142717	0.135647	0.209329	0.207655	0.179134	0.305544	0.096692	0.180177	0.12037	0.149396	0.224583	0.157375	0.182269	0.129592	0.176786	0.188133	0.038999	0.219418	0.0636871	0.129506	0.215195	0.125467	0.141301	0.201179	0.143983	0.143983	0.143983	0.143983	0.143983
	115.069	0.0537157	0.127376	0.0762512	0.144679	0.206295	0.105432	0.108651	0.0445384	0.288813	0.140298	0.226147	0.234469	0.130597	0.165726	0.259455	0.123046	0.0664685	0.184702	0.0757932	0.140741	0.130601	0.208381	0.204119	0.178926	0.306207	0.0939205	0.177163	0.122012	0.149907	0.222064	0.153898	0.181004	0.129322	0.17717	0.188417	0.0405063	0.217487	0.0619844	0.131961	0.218518	0.120209	0.139705	0.202148	0.144353	0.144353	0.144353	0.144353	0.144353
	115.46	0.0501225	0.12669	0.0726131	0.141316	0.202563	0.100549	0.103085	0.0440204	0.285821	0.137739	0.223542	0.231296	0.127529	0.163484	0.258665	0.11865	0.0651937	0.182801	0.0737968	0.138663	0.125599	0.207368	0.200511	0.1786	0.306683	0.0912156	0.17427	0.12358	0.150333	0.219342	0.150393	0.179538	0.129042	0.177524	0.188381	0.0424346	0.215224	0.0606184	0.134061	0.221088	0.1152	0.138073	0.203047	0.144635	0.144635	0.144635	0.144635	0.144635
	115.851	0.0466936	0.125697	0.0691681	0.137904	0.198695	0.0958804	0.0974595	0.0434746	0.282345	0.134899	0.220607	0.227851	0.12448	0.161439	0.257573	0.114009	0.0638578	0.180938	0.0718035	0.136487	0.120656	0.206276	0.196838	0.178138	0.306954	0.0885869	0.17149	0.125074	0.150677	0.216442	0.146849	0.177857	0.128747	0.177868	0.188028	0.044815	0.212654	0.0595511	0.135809	0.22291	0.110544	0.136415	0.20387	0.144803	0.144803	0.144803	0.144803	0.144803
	116.243	0.0434269	0.124351	0.0659322	0.134453	0.194699	0.0914796	0.0917864	0.0429047	0.278428	0.131749	0.217342	0.224129	0.121481	0.159602	0.256195	0.109209	0.0624828	0.179111	0.0698171	0.134212	0.115814	0.20511	0.193091	0.177532	0.307018	0.0860454	0.168842	0.126492	0.150947	0.213381	0.14326	0.175972	0.12845	0.178219	0.187361	0.0476676	0.209814	0.0587636	0.137219	0.223977	0.106348	0.134739	0.204615	0.144856	0.144856	0.144856	0.144856	0.144856
	116.634	0.0403191	0.122611	0.062942	0.130979	0.190583	0.0874396	0.0860753	0.0423106	0.274071	0.128367	0.213764	0.22016	0.118527	0.157971	0.254537	0.104339	0.0610713	0.177309	0.067845	0.131848	0.111092	0.203856	0.189287	0.176773	0.306861	0.0835995	0.166313	0.127858	0.151142	0.21019	0.139616	0.17387	0.128153	0.178598	0.186387	0.0509947	0.206738	0.0581743	0.138297	0.224301	0.102725	0.133051	0.205277	0.14478	0.14478	0.14478	0.14478	0.14478
	117.025	0.0373679	0.120439	0.060242	0.127489	0.186357	0.0838078	0.0803405	0.0416922	0.269291	0.124692	0.209876	0.215941	0.115643	0.156541	0.252603	0.0994847	0.0596303	0.175527	0.0658885	0.129392	0.106527	0.202516	0.185415	0.175854	0.30647	0.0812553	0.163912	0.129149	0.151257	0.206879	0.13591	0.171562	0.127859	0.179001	0.18511	0.0547863	0.203458	0.057752	0.139056	0.223892	0.0997795	0.13136	0.205856	0.144565	0.144565	0.144565	0.144565	0.144565
	117.417	0.0345726	0.117828	0.0578784	0.124001	0.182033	0.0806787	0.0746006	0.0410537	0.264124	0.120806	0.205706	0.211497	0.11283	0.155301	0.250405	0.0947633	0.0581796	0.173752	0.0639555	0.126854	0.10215	0.201089	0.181493	0.174772	0.305839	0.0790198	0.161629	0.130397	0.151287	0.203475	0.132137	0.169047	0.127581	0.179454	0.183538	0.0590183	0.200011	0.0574236	0.13951	0.22275	0.0976108	0.129667	0.206344	0.144214	0.144214	0.144214	0.144214	0.144214
	117.808	0.0319341	0.11477	0.0558973	0.120523	0.177626	0.0780986	0.068876	0.0403923	0.258558	0.116689	0.201271	0.206844	0.110094	0.154228	0.247947	0.0902772	0.0567077	0.171975	0.0620484	0.124235	0.0979873	0.199572	0.177517	0.17352	0.304947	0.0768959	0.159458	0.13158	0.151219	0.199994	0.12829	0.166322	0.127312	0.179951	0.181676	0.0636555	0.196422	0.0571385	0.139676	0.220885	0.0962932	0.127975	0.206738	0.143709	0.143709	0.143709	0.143709	0.143709
	118.2	0.0294555	0.111282	0.0543204	0.117069	0.173151	0.0761272	0.0631958	0.0397137	0.252654	0.112366	0.196598	0.201996	0.107444	0.153306	0.245252	0.086168	0.0552383	0.170187	0.0601724	0.121541	0.0940796	0.197974	0.173496	0.172097	0.303794	0.074889	0.157398	0.132713	0.151041	0.196455	0.124366	0.163399	0.127069	0.180516	0.179537	0.0686554	0.192724	0.0568687	0.139583	0.218281	0.0958779	0.126284	0.207026	0.143066	0.143066	0.143066	0.143066	0.143066
	118.591	0.0271396	0.107383	0.0531556	0.113654	0.168627	0.0747963	0.0575862	0.0390159	0.246404	0.107893	0.191719	0.196989	0.104871	0.152503	0.242339	0.0825572	0.0537525	0.168375	0.058333	0.118781	0.0904456	0.196294	0.169442	0.170494	0.302363	0.0730001	0.155426	0.133795	0.15074	0.192883	0.120362	0.160268	0.126849	0.181161	0.177129	0.0739679	0.188938	0.0565548	0.139253	0.214945	0.0963762	0.124591	0.207198	0.142275	0.142275	0.142275	0.142275	0.142275
	118.982	0.0249893	0.103091	0.0523839	0.110287	0.164073	0.0740999	0.0520796	0.0383024	0.23986	0.103232	0.186657	0.191827	0.102394	0.151798	0.239235	0.0795818	0.0522613	0.166537	0.0565317	0.115955	0.0871287	0.194546	0.165353	0.16871	0.300656	0.0712325	0.153548	0.134814	0.150308	0.189295	0.116278	0.156948	0.126666	0.181904	0.174467	0.079543	0.185089	0.0562035	0.13872	0.210865	0.0977624	0.122891	0.207245	0.141351	0.141351	0.141351	0.141351	0.141351
	119.374	0.0230045	0.0984232	0.0519701	0.106983	0.159506	0.0740363	0.0467043	0.0375753	0.233044	0.0984837	0.181448	0.18655	0.0999996	0.151163	0.235972	0.0773527	0.0507553	0.164659	0.0547758	0.113075	0.0841436	0.19273	0.161254	0.166745	0.298671	0.0695868	0.151737	0.135791	0.14974	0.185725	0.112114	0.153436	0.126526	0.182778	0.171566	0.0853286	0.181203	0.0557713	0.138013	0.20605	0.0999769	0.121177	0.207152	0.140302	0.140302	0.140302	0.140302	0.140302
	119.765	0.0211822	0.0933753	0.0518769	0.103749	0.154941	0.074533	0.041488	0.0368337	0.22598	0.0935962	0.17611	0.181169	0.0977046	0.150574	0.232574	0.075946	0.0492254	0.16274	0.0530649	0.110143	0.0815233	0.190854	0.15714	0.1646	0.296412	0.0680625	0.149993	0.136695	0.149037	0.182192	0.107872	0.14975	0.126436	0.18379	0.168441	0.0912786	0.1773	0.0552611	0.137162	0.200518	0.102929	0.119447	0.206916	0.139137	0.139137	0.139137	0.139137	0.139137
	120.157	0.0195159	0.0879433	0.0520615	0.100598	0.15039	0.075549	0.0364607	0.0360834	0.218724	0.088642	0.170673	0.175706	0.095509	0.150012	0.229071	0.0754057	0.047681	0.160771	0.0514042	0.107167	0.0792814	0.188924	0.153037	0.162283	0.293893	0.0666595	0.148297	0.137552	0.148206	0.178731	0.103556	0.145904	0.126412	0.184978	0.165112	0.0973503	0.173413	0.054664	0.136194	0.194292	0.106517	0.117692	0.206527	0.137879	0.137879	0.137879	0.137879	0.137879
	120.548	0.0179957	0.0820993	0.0524971	0.0975334	0.145863	0.0769776	0.0316512	0.0353216	0.211271	0.0836184	0.165159	0.170186	0.0934182	0.149455	0.225473	0.0757003	0.0461011	0.158747	0.0497944	0.104156	0.0774274	0.186935	0.148951	0.159803	0.291121	0.0653729	0.146635	0.138338	0.14725	0.175364	0.0991715	0.141911	0.126453	0.186341	0.161593	0.103508	0.169561	0.0539567	0.135128	0.187428	0.110625	0.115909	0.205988	0.136528	0.136528	0.136528	0.136528	0.136528
	120.939	0.0166108	0.0758238	0.0531596	0.0945609	0.141367	0.0787446	0.0271055	0.034554	0.203687	0.0785216	0.159588	0.164613	0.0914478	0.148891	0.221796	0.0767767	0.0445076	0.156661	0.0482361	0.101112	0.0759705	0.184895	0.144897	0.157178	0.28812	0.0642	0.145003	0.139055	0.146182	0.172115	0.0947269	0.137806	0.126577	0.187896	0.157905	0.109724	0.165777	0.0531613	0.133988	0.179971	0.115141	0.114094	0.2053	0.13511	0.13511	0.13511	0.13511	0.13511
	121.331	0.0153496	0.0690966	0.0540311	0.0916858	0.136908	0.0807498	0.0228902	0.03378	0.195965	0.0734186	0.153996	0.159022	0.0895897	0.148302	0.21804	0.0785112	0.0428845	0.154504	0.0467324	0.0980469	0.0748922	0.182794	0.140896	0.154424	0.284899	0.0631321	0.143374	0.139705	0.145007	0.169009	0.09023	0.1336	0.12678	0.189635	0.154065	0.11597	0.162084	0.0522431	0.132784	0.171993	0.119957	0.112241	0.204466	0.133626	0.133626	0.133626	0.133626	0.133626
	121.722	0.0142031	0.061912	0.0550953	0.0889043	0.132492	0.0828966	0.0191244	0.0330016	0.188146	0.0682474	0.148402	0.153411	0.0878653	0.147675	0.214204	0.0807797	0.0412506	0.152272	0.0452806	0.0949627	0.0741893	0.180636	0.13695	0.15156	0.281482	0.0621621	0.141752	0.140261	0.143729	0.166054	0.0856922	0.129334	0.12707	0.191542	0.15009	0.122224	0.158504	0.0512334	0.131537	0.163556	0.124968	0.11035	0.203496	0.132086	0.132086	0.132086	0.132086	0.132086
	122.114	0.0131644	0.0542944	0.0563227	0.0862215	0.128124	0.085115	0.0160119	0.0322229	0.180251	0.0631032	0.142851	0.147811	0.0862595	0.146994	0.210293	0.0834268	0.0396079	0.149953	0.0438846	0.0918717	0.0738219	0.178415	0.133091	0.14861	0.277882	0.0612791	0.140111	0.140742	0.142347	0.163268	0.0811241	0.125032	0.127442	0.193608	0.145999	0.128462	0.15506	0.0501212	0.130256	0.154721	0.130078	0.108414	0.202393	0.130499	0.130499	0.130499	0.130499	0.130499
	122.505	0.0122303	0.0462854	0.0576825	0.0836306	0.123812	0.0873037	0.0138627	0.0314415	0.172284	0.0579389	0.137376	0.142235	0.0847838	0.146241	0.206303	0.0863021	0.0379581	0.147546	0.0425417	0.088777	0.073768	0.176133	0.129317	0.145589	0.274114	0.0604717	0.138449	0.141109	0.140854	0.160647	0.0765393	0.12073	0.127888	0.19579	0.141809	0.134656	0.151759	0.048926	0.128957	0.14555	0.135192	0.106433	0.201163	0.128859	0.128859	0.128859	0.128859	0.128859
	122.896	0.0114002	0.0379779	0.0591285	0.0811327	0.119565	0.089425	0.013018	0.0306642	0.164298	0.0528107	0.13202	0.136699	0.0834261	0.145401	0.202248	0.0892669	0.0363211	0.145042	0.0412539	0.0856872	0.0739801	0.173792	0.125656	0.142519	0.270197	0.0597292	0.136752	0.141378	0.139243	0.158196	0.0719518	0.116467	0.128408	0.198074	0.137538	0.140772	0.148613	0.047681	0.127659	0.136081	0.140228	0.104398	0.199806	0.127185	0.127185	0.127185	0.127185	0.127185
	123.288	0.0106748	0.0295092	0.0606148	0.0787238	0.115392	0.0913991	0.0135726	0.0298885	0.156276	0.0477534	0.12683	0.131237	0.0821778	0.144452	0.198139	0.0921766	0.0346808	0.142439	0.0400215	0.0826109	0.0744168	0.171391	0.122114	0.139412	0.266142	0.0590378	0.135008	0.141522	0.137504	0.155908	0.0673769	0.112273	0.128978	0.200418	0.133206	0.146772	0.145617	0.04639	0.126376	0.126372	0.145099	0.102306	0.198324	0.125463	0.125463	0.125463	0.125463	0.125463
	123.679	0.0100558	0.0211595	0.0620979	0.0763988	0.111304	0.0932068	0.0152335	0.0291188	0.148283	0.0427567	0.121838	0.12585	0.081037	0.143379	0.193999	0.0949287	0.0330618	0.139741	0.0388428	0.079551	0.0750365	0.168942	0.118703	0.136285	0.26197	0.0583885	0.133217	0.141534	0.135627	0.153774	0.0628322	0.108203	0.129596	0.202803	0.128832	0.152616	0.142769	0.0451186	0.125133	0.116457	0.149734	0.100149	0.196712	0.123711	0.123711	0.123711	0.123711	0.123711
	124.07	0.00954252	0.0137217	0.063538	0.0741578	0.107309	0.0948129	0.0175619	0.0283565	0.140318	0.0379433	0.11709	0.120577	0.0799778	0.142164	0.189849	0.097408	0.0314439	0.136944	0.0377206	0.0765201	0.075785	0.166442	0.115443	0.133149	0.257694	0.0577692	0.131359	0.141418	0.133609	0.151791	0.0583355	0.104289	0.13024	0.205203	0.124437	0.15826	0.140055	0.0438688	0.123943	0.106397	0.154064	0.0979211	0.194966	0.121926	0.121926	0.121926	0.121926	0.121926
	124.462	0.00913293	0.0101386	0.0649157	0.0719907	0.103412	0.0961994	0.0202093	0.0276011	0.132422	0.0332939	0.112608	0.115422	0.0790073	0.140798	0.185709	0.099548	0.0298411	0.134061	0.0366503	0.0735189	0.0766321	0.163904	0.11233	0.130017	0.253339	0.0571726	0.129444	0.141138	0.131451	0.149941	0.0539087	0.100594	0.130898	0.207596	0.120041	0.163665	0.137463	0.0427037	0.122826	0.0962598	0.158034	0.0956177	0.193083	0.120115	0.120115	0.120115	0.120115	0.120115
	124.853	0.0088216	0.0140842	0.0662173	0.0698978	0.0996192	0.0973776	0.0229665	0.0268582	0.124635	0.0289716	0.10842	0.110409	0.0780968	0.139273	0.181599	0.101281	0.0282475	0.131091	0.0356342	0.0705584	0.0775236	0.161326	0.109389	0.126901	0.248924	0.056591	0.127454	0.140721	0.129159	0.148225	0.0495741	0.097161	0.131558	0.209979	0.115667	0.168796	0.134979	0.041641	0.121793	0.0861383	0.1616	0.093232	0.191059	0.118289	0.118289	0.118289	0.118289	0.118289
	125.245	0.00860021	0.0219135	0.067449	0.067868	0.0959287	0.098323	0.0257142	0.026124	0.116962	0.0250862	0.104545	0.105553	0.0772532	0.13759	0.177522	0.102568	0.0266613	0.128046	0.0346678	0.0676423	0.0784376	0.158711	0.106611	0.123815	0.244475	0.0560182	0.125395	0.140128	0.126746	0.146623	0.0453591	0.0940473	0.132199	0.212323	0.111331	0.173629	0.132583	0.04071	0.12085	0.0761732	0.164727	0.0907654	0.188898	0.116443	0.116443	0.116443	0.116443	0.116443
	125.636	0.00845872	0.0308676	0.0686225	0.0658966	0.0923386	0.0990698	0.0283896	0.0254048	0.109475	0.0218364	0.100989	0.100857	0.0764617	0.135756	0.173483	0.103388	0.0251022	0.124933	0.0337494	0.0647755	0.0793333	0.156059	0.104013	0.120777	0.240021	0.055451	0.123262	0.139376	0.124229	0.145131	0.0412942	0.0913106	0.132819	0.214631	0.107056	0.178148	0.130269	0.0399479	0.120001	0.0665318	0.167395	0.0882157	0.186603	0.114594	0.114594	0.114594	0.114594	0.114594
	126.027	0.00838479	0.0402672	0.0697523	0.0639754	0.0888438	0.0995941	0.0309651	0.0246982	0.102165	0.0195877	0.0977728	0.0963493	0.0757193	0.133779	0.169471	0.103717	0.023562	0.121758	0.0328774	0.0619671	0.0801901	0.153363	0.10159	0.117801	0.235583	0.0548837	0.12105	0.138453	0.121624	0.143736	0.037415	0.0889903	0.133389	0.21687	0.102859	0.182348	0.12802	0.0393425	0.119238	0.0574689	0.169587	0.0855883	0.184185	0.112727	0.112727	0.112727	0.112727	0.112727
	126.419	0.00836687	0.0499035	0.0708561	0.0620927	0.0854389	0.0999191	0.0334259	0.0240064	0.0950993	0.0185898	0.094892	0.0920215	0.0750313	0.131678	0.165474	0.103563	0.0220841	0.11853	0.0320458	0.0592163	0.0809888	0.150625	0.0993407	0.114911	0.231194	0.0543152	0.118771	0.137345	0.118949	0.142421	0.0337652	0.0871419	0.133908	0.219027	0.0987545	0.186233	0.125831	0.0389357	0.118559	0.0493179	0.171297	0.0828887	0.181655	0.110852	0.110852	0.110852	0.110852	0.110852
	126.81	0.00839302	0.0596808	0.0719369	0.0602446	0.0821189	0.100039	0.0357735	0.0233321	0.0882996	0.0190886	0.0923609	0.0879039	0.0743815	0.129463	0.161486	0.102907	0.0206724	0.115252	0.0312556	0.0565342	0.0817058	0.147831	0.0972697	0.112121	0.226867	0.05374	0.116409	0.136072	0.116216	0.141179	0.0303954	0.085781	0.134351	0.221069	0.0947606	0.189807	0.123693	0.0386904	0.117946	0.0425461	0.172516	0.0801241	0.179026	0.108954	0.108954	0.108954	0.108954	0.108954
	127.202	0.00845385	0.0695247	0.0729981	0.0584163	0.0788807	0.099947	0.0380057	0.0226721	0.0818027	0.0209548	0.0901748	0.0840011	0.0737873	0.127156	0.157493	0.101756	0.0193828	0.111934	0.0305001	0.05392	0.0823412	0.144984	0.0953564	0.109452	0.222628	0.0531561	0.113983	0.134598	0.113431	0.13998	0.0273684	0.0849362	0.134706	0.222954	0.0908882	0.193082	0.121602	0.0386282	0.117394	0.0377592	0.173237	0.0773064	0.176317	0.107025	0.107025	0.107025	0.107025	0.107025
	127.593	0.00854188	0.0793449	0.0740265	0.0566059	0.0757236	0.099667	0.0401241	0.0220326	0.0756883	0.0238177	0.0883283	0.0803274	0.0732256	0.124768	0.153504	0.100102	0.0182467	0.108579	0.0297794	0.0513806	0.0828713	0.142078	0.0936096	0.106917	0.218487	0.0525591	0.11148	0.132954	0.1106	0.138815	0.0247553	0.0845967	0.134955	0.224655	0.0871519	0.196063	0.119552	0.0387159	0.116889	0.0355266	0.173452	0.0744423	0.173538	0.105062	0.105062	0.105062	0.105062	0.105062
	127.984	0.00865213	0.0890543	0.0750073	0.0548026	0.0726485	0.099176	0.0421253	0.0214089	0.0699782	0.0274256	0.0868124	0.0769127	0.0727089	0.12231	0.149524	0.0979384	0.0173187	0.105199	0.0290903	0.04892	0.0833044	0.139113	0.0919986	0.104525	0.214452	0.0519449	0.108911	0.131111	0.107718	0.137653	0.0226354	0.0847469	0.135073	0.226114	0.0835612	0.198752	0.117535	0.0389374	0.116423	0.0360739	0.173147	0.0715457	0.170702	0.10304	0.10304	0.10304	0.10304	0.10304
	128.376	0.00878246	0.0985469	0.0759238	0.0530031	0.0696592	0.0985203	0.0440011	0.0208054	0.0647955	0.0314402	0.0855938	0.0737532	0.0722192	0.119794	0.14557	0.0952777	0.0166561	0.101801	0.0284296	0.0465383	0.0836247	0.136097	0.090525	0.102287	0.210532	0.0513117	0.106281	0.129082	0.104787	0.136477	0.0210808	0.0853532	0.135053	0.227311	0.0801267	0.201145	0.115547	0.0392847	0.115995	0.0390327	0.172313	0.0686235	0.167816	0.100966	0.100966	0.100966	0.100966	0.100966
	128.767	0.00893077	0.107734	0.0767575	0.0512052	0.0667584	0.0976909	0.0457458	0.0202211	0.0601967	0.0357445	0.0846484	0.070887	0.07175	0.117222	0.141662	0.0921152	0.0162929	0.0983964	0.0277977	0.0442441	0.0838358	0.133026	0.089163	0.1002	0.20672	0.0506547	0.103583	0.12687	0.101804	0.135268	0.0201387	0.0863569	0.134864	0.228201	0.0768579	0.203233	0.113573	0.0397082	0.115597	0.0436937	0.170937	0.0656873	0.164886	0.0988169	0.0988169	0.0988169	0.0988169	0.0988169
	129.159	0.00909585	0.116537	0.0775041	0.049403	0.0639491	0.0967364	0.0473467	0.0196546	0.056296	0.0402198	0.0839257	0.0683073	0.0712984	0.114605	0.137813	0.0884925	0.0162833	0.0950028	0.0271885	0.0420334	0.0839374	0.129919	0.0878967	0.0982648	0.203022	0.049975	0.100839	0.124457	0.0987749	0.134003	0.0198083	0.08771	0.134501	0.22877	0.0737608	0.205008	0.111609	0.040223	0.115235	0.0494023	0.169016	0.0627465	0.161918	0.0965991	0.0965991	0.0965991	0.0965991	0.0965991
	129.55	0.00927312	0.124899	0.0781591	0.0476012	0.0612318	0.0956855	0.0488007	0.0191101	0.0532048	0.044739	0.0833831	0.0660302	0.0708387	0.111944	0.134037	0.0844353	0.0166147	0.0916291	0.0266031	0.039914	0.083923	0.126772	0.0867149	0.0964734	0.199425	0.0492707	0.0980366	0.121879	0.095709	0.132679	0.02003	0.08933	0.133945	0.229004	0.0708432	0.206457	0.109642	0.0407705	0.114902	0.055667	0.166553	0.05981	0.158911	0.0943072	0.0943072	0.0943072	0.0943072	0.0943072
	129.941	0.00945566	0.1328	0.0787356	0.0457933	0.0586038	0.0945663	0.0501023	0.0185815	0.0509672	0.0493314	0.0829745	0.0640606	0.070383	0.109253	0.130328	0.0800138	0.0173034	0.0882973	0.0260352	0.0378838	0.0838074	0.123601	0.085585	0.094818	0.195931	0.0485448	0.0951974	0.119106	0.0926214	0.131277	0.0207008	0.0911612	0.133188	0.228893	0.0681066	0.207579	0.107666	0.0413637	0.1146	0.0621789	0.163557	0.0568921	0.155875	0.0919377	0.0919377	0.0919377	0.0919377	0.0919377
	130.333	0.00963247	0.140229	0.0792474	0.0439847	0.056061	0.093441	0.0512555	0.0180744	0.0496726	0.0538531	0.0826506	0.0623793	0.0699016	0.106541	0.126679	0.0753047	0.0182919	0.0850168	0.0254829	0.0359444	0.0835794	0.120405	0.0845079	0.09329	0.192531	0.0477997	0.0923179	0.116175	0.0895357	0.129803	0.0216969	0.0931231	0.132229	0.228454	0.0655545	0.208374	0.10568	0.0419642	0.114322	0.0687249	0.160054	0.0540019	0.152811	0.0895047	0.0895047	0.0895047	0.0895047	0.0895047
	130.724	0.00978938	0.147203	0.0797131	0.0421722	0.0535958	0.09231	0.0522689	0.0175838	0.0492645	0.0583632	0.0823833	0.061	0.0694103	0.103827	0.12307	0.0704014	0.0195584	0.081805	0.0249432	0.0340989	0.0832605	0.117186	0.0834462	0.0918774	0.189219	0.0470389	0.0894073	0.113076	0.0864745	0.128251	0.0229021	0.0951553	0.131053	0.227672	0.0631843	0.208854	0.103681	0.042554	0.114056	0.0751491	0.156071	0.0511585	0.149734	0.0869941	0.0869941	0.0869941	0.0869941	0.0869941
	131.115	0.00991195	0.15373	0.0801521	0.0403558	0.0512021	0.0912371	0.053152	0.0171109	0.0496955	0.0627826	0.0821335	0.0598861	0.068895	0.10113	0.11948	0.065435	0.0210386	0.0786728	0.0244099	0.0323424	0.0828464	0.113951	0.0824013	0.0905747	0.185994	0.0462681	0.0864798	0.109818	0.0834651	0.126626	0.0242167	0.0971981	0.129675	0.22657	0.0609923	0.209041	0.101681	0.0431303	0.113795	0.0813507	0.151649	0.0483756	0.146654	0.0844258	0.0844258	0.0844258	0.0844258	0.0844258
	131.507	0.00998529	0.159816	0.0805698	0.0385386	0.0488734	0.0902079	0.0539225	0.0166565	0.0508562	0.0670982	0.0818875	0.0590399	0.0683612	0.0984686	0.115894	0.0605278	0.0226886	0.0756277	0.0238837	0.0306812	0.0823533	0.110689	0.0813476	0.0893704	0.182841	0.045489	0.0835278	0.106429	0.0805286	0.124935	0.0255642	0.0991893	0.128079	0.225133	0.0589727	0.208963	0.0996873	0.0436411	0.113515	0.087232	0.146825	0.0456739	0.143589	0.0817851	0.0817851	0.0817851	0.0817851	0.0817851
	131.898	0.00999962	0.165445	0.0809705	0.036715	0.046607	0.0892502	0.0545889	0.0162153	0.0525724	0.0713421	0.0816245	0.0584376	0.0678195	0.0958695	0.112299	0.0558645	0.0244679	0.0726822	0.0233577	0.0291081	0.0817921	0.10741	0.0802741	0.0882609	0.179763	0.0447075	0.0805778	0.102887	0.0776827	0.123172	0.0268865	0.101093	0.126278	0.223363	0.0571143	0.208652	0.0977189	0.0441093	0.113208	0.0927459	0.141641	0.0430729	0.140557	0.0790805	0.0790805	0.0790805	0.0790805	0.0790805
	132.29	0.0099487	0.170569	0.0813368	0.034893	0.0444034	0.0883573	0.0551643	0.0157928	0.0547524	0.0754096	0.0813315	0.0580522	0.0672577	0.0933451	0.108703	0.0516258	0.0263193	0.0698354	0.0228332	0.0276271	0.0811663	0.104105	0.0791767	0.0872378	0.17674	0.0439233	0.0776172	0.099239	0.074939	0.12135	0.0281414	0.10285	0.124267	0.221252	0.0554082	0.208141	0.0957925	0.044482	0.112854	0.0978486	0.136134	0.040591	0.137575	0.0763095	0.0763095	0.0763095	0.0763095	0.0763095
	132.681	0.00983352	0.175133	0.0816483	0.033068	0.042266	0.0875059	0.0556497	0.0153813	0.0572131	0.0793962	0.0810023	0.0578814	0.0667028	0.0909159	0.105116	0.0480568	0.0282324	0.0670989	0.0223069	0.0262349	0.0805001	0.100785	0.0780297	0.0862946	0.173766	0.0431388	0.0746687	0.0954614	0.0723	0.119456	0.0292994	0.104439	0.122044	0.218774	0.0538391	0.207458	0.0939264	0.0447808	0.112445	0.10253	0.130336	0.0382502	0.134661	0.0734636	0.0734636	0.0734636	0.0734636	0.0734636
	133.072	0.00966069	0.179054	0.0818736	0.0312477	0.0402019	0.0867101	0.0560424	0.0149851	0.059876	0.0831768	0.0806166	0.0578743	0.0661304	0.0885863	0.10156	0.045409	0.0301495	0.064471	0.0217775	0.0249282	0.0797864	0.0974524	0.0768453	0.0854247	0.170822	0.0423532	0.0717315	0.0915894	0.0697673	0.117499	0.0303385	0.105814	0.119617	0.215935	0.052395	0.206625	0.0921411	0.0449966	0.111975	0.106803	0.124278	0.0360637	0.131825	0.0705585	0.0705585	0.0705585	0.0705585	0.0705585
	133.464	0.00944048	0.182265	0.0819786	0.0294354	0.0382173	0.0859146	0.056335	0.0146005	0.0626385	0.0868051	0.0801718	0.0580278	0.065562	0.0863598	0.0980595	0.0439265	0.0320778	0.0619594	0.0212467	0.0237094	0.0790506	0.0941157	0.0755943	0.0846149	0.167891	0.0415646	0.0688109	0.087629	0.0673354	0.115472	0.0312456	0.10695	0.116976	0.212704	0.0510606	0.205654	0.0904452	0.0451289	0.111442	0.110684	0.117984	0.0340496	0.129078	0.0675797	0.0675797	0.0675797	0.0675797	0.0675797
	133.855	0.00918646	0.184706	0.0819393	0.0276345	0.0363181	0.0851466	0.0565108	0.014225	0.0653978	0.0902317	0.0796464	0.0582938	0.0649766	0.0842332	0.0946273	0.0437874	0.0339793	0.0595677	0.0207099	0.0225692	0.0782849	0.0907944	0.0742891	0.0838562	0.164958	0.0407737	0.065926	0.0835811	0.0650031	0.113372	0.03201	0.107821	0.11414	0.209102	0.0498217	0.20455	0.0888546	0.0452262	0.110856	0.114223	0.111485	0.0322147	0.12642	0.0645547	0.0645547	0.0645547	0.0645547	0.0645547
	134.247	0.00890823	0.186351	0.0817312	0.0258569	0.0345066	0.0843591	0.0565608	0.0138621	0.0681356	0.0933971	0.0790346	0.0586415	0.0643711	0.082192	0.0912758	0.0450076	0.0358566	0.0572972	0.020171	0.0215116	0.0775013	0.087492	0.0729141	0.0831293	0.161995	0.0399768	0.0630656	0.0794912	0.0627695	0.111208	0.0326272	0.108395	0.111099	0.205127	0.0486659	0.203307	0.0873677	0.0452705	0.110216	0.117445	0.104812	0.0305674	0.123853	0.061483	0.061483	0.061483	0.061483	0.061483
	134.638	0.00861275	0.187207	0.0813529	0.0241018	0.0327804	0.0835689	0.056468	0.0135029	0.0707336	0.0963615	0.0783265	0.0590478	0.0637418	0.0802282	0.0879935	0.0474829	0.0377045	0.0551571	0.0196249	0.0205267	0.0767013	0.0842359	0.0714668	0.0824202	0.158995	0.0391768	0.0602596	0.0753369	0.0606396	0.108976	0.0330938	0.108663	0.107873	0.200807	0.0475785	0.201919	0.0859892	0.0453309	0.109537	0.1204	0.0980034	0.0291076	0.121371	0.0583902	0.0583902	0.0583902	0.0583902	0.0583902
	135.029	0.00829771	0.187311	0.0808061	0.0223827	0.031134	0.0827704	0.0562301	0.013154	0.0731985	0.0989819	0.0775144	0.0594551	0.063059	0.0783193	0.0847682	0.0509605	0.0395036	0.0531426	0.0190729	0.0196139	0.0758776	0.0810268	0.0699552	0.081709	0.155933	0.0383722	0.0574955	0.0711775	0.0586242	0.106696	0.0334093	0.108595	0.104473	0.19618	0.0465503	0.200377	0.0847131	0.0453979	0.108818	0.123108	0.0911094	0.0278299	0.118966	0.0553014	0.0553014	0.0553014	0.0553014	0.0553014
	135.421	0.00795431	0.186733	0.0801087	0.0206995	0.0295577	0.0819471	0.0558449	0.0128077	0.0754502	0.101365	0.0766072	0.0598617	0.0623389	0.0764566	0.081578	0.055193	0.0412738	0.0512619	0.0185133	0.0187686	0.0750427	0.0778842	0.0683602	0.0809782	0.152806	0.0375665	0.0547955	0.0670027	0.056736	0.10437	0.0335758	0.108192	0.100912	0.191275	0.0455679	0.198677	0.0835328	0.0455027	0.108061	0.125588	0.0841852	0.0267271	0.116635	0.0522313	0.0522313	0.0522313	0.0522313	0.0522313
	135.812	0.00756833	0.185541	0.0792825	0.0190584	0.028043	0.0811336	0.0553198	0.0124656	0.0774584	0.103395	0.0756019	0.0602142	0.0615436	0.0746225	0.0784032	0.0599109	0.0429745	0.0495059	0.0179431	0.0179821	0.0741762	0.0748113	0.0667072	0.0802145	0.149602	0.0367623	0.0521627	0.062849	0.0549938	0.102022	0.0335953	0.107438	0.0972183	0.186157	0.0446234	0.196818	0.0824448	0.0456671	0.107263	0.127854	0.0773021	0.0257804	0.114365	0.0492253	0.0492253	0.0492253	0.0492253	0.0492253
	136.203	0.00712182	0.183806	0.0783434	0.0174647	0.0265819	0.0802782	0.0546705	0.0121278	0.0792202	0.105115	0.0745195	0.0605076	0.0606959	0.0728105	0.0752418	0.064918	0.0446244	0.0478734	0.0173652	0.0172557	0.0732942	0.0718095	0.0649746	0.0794028	0.14632	0.0359616	0.0495985	0.0587472	0.0534108	0.0996659	0.0334737	0.106335	0.0933994	0.180848	0.0437068	0.194809	0.0814368	0.0458624	0.106408	0.129892	0.0705324	0.0249757	0.112159	0.0462905	0.0462905	0.0462905	0.0462905	0.0462905
	136.595	0.00660198	0.18157	0.0773081	0.0159151	0.0251711	0.0794169	0.0539084	0.0117879	0.0806576	0.106534	0.0733661	0.0607236	0.0597763	0.0710162	0.0720973	0.0700508	0.0461819	0.0463547	0.0167746	0.0165762	0.0723778	0.0688882	0.0631863	0.0785397	0.142966	0.0351696	0.0471259	0.0546971	0.0520007	0.097311	0.0332157	0.104893	0.0894929	0.175409	0.0428091	0.192664	0.0805104	0.0461354	0.105493	0.131716	0.0639632	0.0242866	0.110009	0.0434751	0.0434751	0.0434751	0.0434751	0.0434751
	136.986	0.00599851	0.178841	0.0761691	0.0144199	0.0238119	0.0784863	0.053055	0.011453	0.0818258	0.107573	0.0721597	0.0608346	0.0587944	0.0692345	0.069001	0.0751851	0.0476384	0.044935	0.0161767	0.0159458	0.0714339	0.0660341	0.0613376	0.0776178	0.139539	0.0343846	0.0447289	0.0507678	0.0507675	0.0949805	0.0328293	0.103108	0.0855078	0.169864	0.0419243	0.190402	0.079655	0.0464401	0.104495	0.133312	0.0576845	0.0236933	0.107918	0.0407923	0.0407923	0.0407923	0.0407923	0.0407923
	137.378	0.00531387	0.175602	0.0749152	0.0129734	0.022509	0.0774769	0.0521156	0.0111133	0.0826464	0.108357	0.0709128	0.0608578	0.0577639	0.0674718	0.0659885	0.0802497	0.0489771	0.043606	0.0155692	0.0153537	0.0704584	0.0632618	0.0594335	0.0766409	0.136055	0.0336104	0.0424386	0.0469458	0.0497074	0.0926687	0.0323226	0.101009	0.0814726	0.164244	0.0410429	0.188042	0.0788724	0.0468135	0.103413	0.134695	0.0517988	0.0231705	0.105886	0.0382776	0.0382776	0.0382776	0.0382776	0.0382776
	137.769	0.00455821	0.171798	0.0735145	0.0115855	0.0212701	0.0763502	0.0510984	0.0107754	0.0831658	0.108739	0.0696277	0.0607497	0.0566698	0.065721	0.0631017	0.0851562	0.0501583	0.0423437	0.0149554	0.0147968	0.0694406	0.0605583	0.0574946	0.0756105	0.132513	0.0328428	0.0402389	0.0433088	0.0488096	0.0903942	0.0317041	0.0985925	0.0774091	0.158585	0.0401617	0.1856	0.0781573	0.0472544	0.102237	0.135879	0.046424	0.0226958	0.10391	0.0359632	0.0359632	0.0359632	0.0359632	0.0359632
	138.161	0.00375411	0.167386	0.0719314	0.0102572	0.0201001	0.0750378	0.0499971	0.0104346	0.0833672	0.108845	0.0683151	0.0605311	0.0555494	0.0639877	0.0603802	0.0898711	0.0511984	0.0411414	0.0143392	0.0142723	0.0683929	0.0579371	0.055505	0.0745297	0.128929	0.0320802	0.0381492	0.0398719	0.0480533	0.0881471	0.0309844	0.0958867	0.0733306	0.152897	0.0392735	0.183086	0.0775038	0.0477583	0.100969	0.136882	0.0416919	0.0222511	0.10199	0.0338674	0.0338674	0.0338674	0.0338674	0.0338674
	138.552	0.00293553	0.162315	0.0701343	0.00899211	0.0190013	0.073549	0.0487985	0.0100892	0.0832314	0.108583	0.0669619	0.060171	0.0543694	0.0622593	0.0578386	0.0943175	0.0520513	0.0399767	0.0137192	0.0137697	0.0672903	0.0553995	0.0535002	0.0734041	0.125303	0.0313188	0.0361712	0.0366922	0.0474176	0.0859318	0.0301719	0.0928999	0.0692744	0.147232	0.0383765	0.180498	0.0769082	0.0483792	0.0996198	0.137748	0.0377592	0.0218142	0.100116	0.0320399	0.0320399	0.0320399	0.0320399	0.0320399
	138.943	0.0021445	0.156582	0.0680926	0.00780122	0.0179688	0.0717957	0.0474904	0.00974433	0.08282	0.107957	0.0655698	0.0596595	0.0531612	0.0605281	0.0554827	0.098449	0.0527486	0.0388423	0.0131033	0.0132927	0.0661495	0.0529505	0.0514595	0.0722299	0.121642	0.0305523	0.0343001	0.0338395	0.0468773	0.0837491	0.0292778	0.0896449	0.0652482	0.141607	0.0374685	0.177826	0.0763514	0.0490738	0.0981948	0.138492	0.0347786	0.0213743	0.0982797	0.0304848	0.0304848	0.0304848	0.0304848	0.0304848
	139.335	0.00144283	0.150217	0.0658049	0.00668035	0.0169912	0.0698232	0.0460497	0.00938992	0.082055	0.107021	0.0641219	0.0590004	0.0518964	0.058777	0.0532899	0.102202	0.0532718	0.0377274	0.0124876	0.0128281	0.0649452	0.0506083	0.0494099	0.0710093	0.117951	0.0297797	0.032559	0.0313431	0.0464142	0.0815901	0.0283107	0.0861459	0.0612975	0.13609	0.0365479	0.175049	0.0758234	0.0498914	0.0967168	0.139161	0.0328798	0.0209117	0.0964625	0.0292476	0.0292476	0.0292476	0.0292476	0.0292476
	139.705	0.000917	0.143302	0.0632771	0.00564365	0.016054	0.0675911	0.0444725	0.00903645	0.0810269	0.105635	0.062611	0.058151	0.0505722	0.0569823	0.0512324	0.105505	0.0536365	0.0366222	0.0118783	0.0123794	0.0636816	0.0483656	0.0473485	0.069732	0.114228	0.0289943	0.0309236	0.0293119	0.0460149	0.0794714	0.0272805	0.0824042	0.0574422	0.130724	0.0356178	0.172142	0.0752948	0.050788	0.0951867	0.139755	0.0321014	0.0204185	0.0946459	0.0283194	0.0283194	0.0283194	0.0283194	0.0283194
Figure 8-figure supplement 1A (F2)	Distance (nm)	ACF1	ACF2	ACF3	ACF4	ACF5	ACF6	ACF7	ACF8	ACF9	ACF10	ACF11	ACF12	ACF13	ACF14	ACF15	ACF16	ACF17	ACF18	ACF19	ACF20	ACF21	ACF22	ACF23	ACF24	ACF25	ACF26	ACF27	ACF28	ACF29	ACF30	ACF31	ACF32	ACF33	ACF34	ACF35	ACF36	ACF37	ACF38	ACF39	ACF40	ACF41	ACF42	ACF43	ACF44	ACF45	ACF46	ACF47	ACF48
	0	1.00021	1.00029	1.00007	1.00012	1.00003	1.00015	1.00002	1.00017	1.00001	1.00011	1.00006	1.00008	1.00004	1.00013	1.00002	1.00001	1.00021	1.00008	1.00004	1.00001	1.00002	1	1.00002	1.00006	1	1	1	1.00001	1.00004	1.00001	1.00004	1	1.00003	1.00006	1.00005	1.00003	1.00002	1.00001	1.00006	1.00001	1.00001	1.00004	1	1.00016	1.00002	1.00021	1.00004	1.00001
	0.391389	0.997359	0.997041	0.997915	0.998197	0.996616	0.997134	0.997387	0.996831	0.998633	0.997169	0.997098	0.995045	0.998151	0.996654	0.998858	0.998675	0.993617	0.997446	0.99823	0.998141	0.998491	0.998804	0.998694	0.998937	0.998967	0.997962	0.998982	0.9987	0.998265	0.997529	0.998403	0.998137	0.997594	0.999167	0.998522	0.998598	0.998924	0.998486	0.998502	0.998466	0.996715	0.995647	0.998428	0.997005	0.997818	0.997609	0.998193	0.998239
	0.782779	0.989564	0.988079	0.993095	0.993036	0.990002	0.989463	0.992144	0.98778	0.994824	0.98984	0.988795	0.982655	0.993389	0.989374	0.995568	0.995789	0.982039	0.99136	0.994169	0.9937	0.995418	0.996188	0.99596	0.996273	0.996189	0.994357	0.996418	0.99569	0.994563	0.992278	0.993974	0.994501	0.992311	0.996743	0.994736	0.995043	0.9969	0.994792	0.994514	0.995573	0.991258	0.989082	0.994019	0.990211	0.993772	0.990952	0.994398	0.994809
	1.17417	0.9778	0.974561	0.98635	0.985223	0.981507	0.978205	0.985291	0.974269	0.988946	0.979039	0.976027	0.964578	0.986391	0.979573	0.990309	0.991683	0.968487	0.982694	0.988391	0.987257	0.99126	0.992452	0.992248	0.992433	0.991821	0.989895	0.992641	0.991326	0.989573	0.985145	0.987154	0.989734	0.984984	0.993025	0.989026	0.989798	0.994312	0.989286	0.988575	0.991817	0.984963	0.982298	0.987079	0.980996	0.988647	0.981151	0.989279	0.990337
	1.56556	0.962786	0.957401	0.977423	0.975083	0.970201	0.963721	0.976131	0.957222	0.98127	0.964898	0.959535	0.940992	0.977317	0.966627	0.983132	0.985986	0.950389	0.971251	0.980549	0.978684	0.985501	0.987266	0.987233	0.987361	0.985848	0.98361	0.987714	0.985357	0.982947	0.975677	0.978139	0.983222	0.975153	0.98814	0.98126	0.982885	0.990742	0.981725	0.98081	0.986592	0.976307	0.972776	0.97778	0.968924	0.981515	0.968562	0.982392	0.984256
	1.95695	0.94538	0.937607	0.967087	0.963136	0.957496	0.947005	0.965738	0.937746	0.97213	0.948318	0.940087	0.913538	0.966748	0.951882	0.974194	0.979092	0.930925	0.95791	0.971206	0.968559	0.978668	0.980981	0.981401	0.981422	0.978449	0.976342	0.98195	0.978163	0.975355	0.964815	0.967328	0.975678	0.963677	0.982317	0.97183	0.974729	0.98661	0.972476	0.97167	0.980471	0.966785	0.962685	0.966413	0.955252	0.973231	0.954051	0.97443	0.977263
	2.34834	0.926282	0.916053	0.955378	0.949726	0.943055	0.928545	0.95391	0.916732	0.961808	0.929611	0.918385	0.882761	0.954934	0.935218	0.963584	0.970842	0.909214	0.942759	0.960262	0.95694	0.970526	0.973462	0.974638	0.974664	0.969675	0.967639	0.975464	0.969669	0.966696	0.952476	0.954968	0.966852	0.950453	0.975707	0.960767	0.965447	0.981707	0.961481	0.961352	0.973155	0.955679	0.950821	0.953188	0.939994	0.963376	0.938073	0.965254	0.969133
	2.73973	0.906166	0.893555	0.942688	0.935248	0.927613	0.909029	0.941175	0.895016	0.950599	0.909386	0.895076	0.849744	0.942278	0.917383	0.951423	0.961437	0.886578	0.926299	0.948008	0.944164	0.961334	0.964899	0.967211	0.967321	0.959655	0.957855	0.968474	0.960075	0.957338	0.939164	0.941372	0.957096	0.935952	0.968484	0.948298	0.955323	0.976241	0.948916	0.950196	0.96493	0.943678	0.938034	0.938359	0.923864	0.952291	0.921251	0.95522	0.960212
	3.13111	0.885517	0.870716	0.929227	0.919976	0.911364	0.888895	0.92773	0.873178	0.938748	0.888013	0.870666	0.815156	0.929046	0.898669	0.937814	0.950925	0.86354	0.908799	0.934561	0.930407	0.951143	0.955355	0.959201	0.959507	0.948487	0.947035	0.961107	0.949462	0.947395	0.925081	0.926767	0.946512	0.920364	0.960772	0.934555	0.944524	0.97022	0.934885	0.938424	0.955815	0.930871	0.924415	0.922135	0.907195	0.94005	0.903973	0.944446	0.950589
	3.52251	0.864612	0.847898	0.914982	0.904082	0.894347	0.868354	0.913555	0.851498	0.926454	0.865701	0.845499	0.779326	0.915397	0.879185	0.922831	0.939326	0.839732	0.890341	0.919945	0.91573	0.939966	0.944874	0.950649	0.951289	0.936239	0.935113	0.953443	0.93785	0.936905	0.910264	0.911304	0.935122	0.903752	0.952642	0.919582	0.933147	0.963645	0.919394	0.926205	0.945831	0.917226	0.909713	0.904688	0.890088	0.926566	0.886443	0.932944	0.940271
	3.91389	0.843573	0.82526	0.900129	0.887688	0.876959	0.847591	0.898957	0.830044	0.913877	0.842699	0.819775	0.7427	0.901511	0.859336	0.906564	0.926799	0.816088	0.871172	0.904355	0.900293	0.928014	0.933638	0.941721	0.942772	0.923017	0.922393	0.945559	0.925379	0.92605	0.894968	0.895115	0.923207	0.886392	0.944144	0.903508	0.921322	0.956653	0.9026	0.913705	0.935195	0.903276	0.894699	0.886187	0.872895	0.912156	0.868802	0.920913	0.929487
	4.30528	0.8223	0.802722	0.884452	0.870774	0.85885	0.826439	0.883637	0.808599	0.901111	0.818923	0.793542	0.705089	0.887369	0.838866	0.889061	0.913284	0.791582	0.85113	0.887688	0.883988	0.915195	0.921637	0.932337	0.933908	0.908857	0.908648	0.937419	0.911983	0.914674	0.878958	0.878219	0.910645	0.868122	0.935253	0.886277	0.909018	0.949146	0.884457	0.900944	0.923807	0.888681	0.87873	0.866738	0.855355	0.896588	0.85089	0.908178	0.918076
	4.69667	0.800644	0.780121	0.867991	0.853334	0.840308	0.804832	0.867768	0.786884	0.888239	0.794455	0.766788	0.666636	0.873041	0.81805	0.870399	0.898943	0.766714	0.830324	0.870099	0.866881	0.901727	0.909069	0.922639	0.924748	0.893849	0.894167	0.929031	0.897771	0.902893	0.862366	0.860656	0.897698	0.84913	0.925952	0.86796	0.896291	0.941268	0.865083	0.888004	0.911913	0.873979	0.862523	0.846471	0.83764	0.880142	0.832605	0.894869	0.906232
	5.08806	0.778376	0.757223	0.850592	0.835295	0.821002	0.782521	0.85111	0.764549	0.87531	0.769164	0.739462	0.627132	0.858481	0.796656	0.850645	0.883744	0.740878	0.80861	0.851526	0.848865	0.887564	0.895965	0.912559	0.915222	0.878039	0.878818	0.920321	0.882702	0.890548	0.84497	0.84241	0.884306	0.829272	0.916184	0.848524	0.88309	0.932941	0.844486	0.874851	0.899452	0.858946	0.845714	0.825484	0.819501	0.862705	0.813671	0.880833	0.893829
	5.47945	0.755324	0.73385	0.8322	0.81663	0.800987	0.759372	0.833639	0.741333	0.862384	0.743057	0.711559	0.586625	0.843713	0.774767	0.829881	0.867785	0.713942	0.785989	0.832038	0.829933	0.872834	0.882472	0.902167	0.905337	0.861505	0.862719	0.911257	0.866824	0.87765	0.82675	0.823501	0.870606	0.808605	0.905913	0.827994	0.869428	0.924242	0.822724	0.861509	0.886582	0.843854	0.828547	0.803904	0.800933	0.844372	0.793913	0.866081	0.880936
	5.87084	0.7314	0.709926	0.812868	0.797352	0.780216	0.735323	0.815366	0.717123	0.84953	0.716169	0.683151	0.545283	0.828788	0.752425	0.808218	0.851123	0.686154	0.762509	0.81171	0.8101	0.857611	0.868707	0.89149	0.895088	0.84433	0.845948	0.901808	0.850184	0.864173	0.807685	0.803976	0.856698	0.787162	0.895117	0.806431	0.855321	0.915181	0.799901	0.847985	0.873364	0.828814	0.811196	0.781881	0.781954	0.825249	0.773201	0.850611	0.867585
	6.26223	0.706616	0.685499	0.792567	0.777514	0.758584	0.710361	0.796177	0.691938	0.836842	0.688562	0.654412	0.503325	0.813768	0.72962	0.785767	0.83379	0.657118	0.73817	0.790569	0.78936	0.841933	0.854761	0.880542	0.884475	0.826594	0.828458	0.891953	0.832794	0.850071	0.787697	0.783908	0.842611	0.764934	0.883794	0.783871	0.840794	0.905758	0.776052	0.834307	0.859845	0.813821	0.793465	0.759581	0.762514	0.80528	0.751469	0.834373	0.853749
	6.65362	0.681131	0.660776	0.771511	0.757265	0.736344	0.68469	0.7763	0.666004	0.824447	0.660489	0.625631	0.46138	0.798827	0.706668	0.762679	0.815919	0.627609	0.713211	0.768807	0.767861	0.825971	0.840816	0.86945	0.873581	0.80842	0.81048	0.881737	0.814777	0.835462	0.766972	0.763441	0.828572	0.742138	0.87199	0.76046	0.825956	0.896066	0.751341	0.820566	0.846195	0.799258	0.775881	0.73722	0.742901	0.784706	0.728833	0.817513	0.839597
	7.04501	0.655172	0.636051	0.749769	0.736764	0.713401	0.658484	0.755686	0.639622	0.812485	0.632132	0.597177	0.419979	0.784102	0.683597	0.739097	0.797523	0.59746	0.687719	0.746473	0.745658	0.809729	0.826944	0.858222	0.862438	0.789902	0.791932	0.871185	0.796159	0.820323	0.745493	0.742721	0.814588	0.718798	0.859758	0.736279	0.810874	0.886071	0.725833	0.80683	0.832405	0.785014	0.758141	0.715015	0.723157	0.763457	0.705405	0.800002	0.825098
	7.4364	0.629065	0.61172	0.727561	0.716246	0.690115	0.632086	0.734598	0.613189	0.801125	0.603858	0.569493	0.380052	0.769826	0.660815	0.715184	0.778753	0.567316	0.661987	0.723787	0.722952	0.793398	0.813337	0.84702	0.851177	0.771175	0.773043	0.860396	0.777084	0.804831	0.72351	0.721951	0.800903	0.695198	0.847189	0.711493	0.795703	0.875892	0.699678	0.793251	0.818673	0.771514	0.740735	0.693219	0.703651	0.74175	0.681459	0.782031	0.810455
	7.82779	0.60313	0.588177	0.705034	0.695927	0.66653	0.60578	0.713121	0.58708	0.790528	0.57594	0.543036	0.342447	0.75618	0.638457	0.691099	0.75965	0.537435	0.636198	0.700861	0.699867	0.777016	0.800087	0.835888	0.839869	0.75235	0.753819	0.84944	0.757618	0.789031	0.701116	0.701315	0.787578	0.671456	0.83437	0.686225	0.780546	0.865518	0.67299	0.779935	0.805009	0.758736	0.72357	0.672073	0.684551	0.719615	0.657215	0.763649	0.795704
	8.21918	0.577681	0.565797	0.682284	0.676028	0.642898	0.579859	0.691389	0.561602	0.780852	0.548704	0.518255	0.308225	0.743356	0.616809	0.666992	0.740325	0.507912	0.610556	0.677858	0.676555	0.760716	0.787343	0.824945	0.828628	0.733542	0.734375	0.838413	0.737868	0.773054	0.678474	0.680998	0.774771	0.647788	0.821394	0.66059	0.765531	0.855028	0.645864	0.767029	0.791557	0.746931	0.706817	0.651816	0.666103	0.697139	0.632919	0.744975	0.780973
	8.61057	0.552975	0.544882	0.659452	0.656741	0.619402	0.554573	0.669574	0.536965	0.772225	0.522425	0.495548	0.278502	0.731514	0.596083	0.643016	0.720866	0.479221	0.585271	0.654939	0.653164	0.744596	0.77523	0.814277	0.817544	0.714863	0.714835	0.827397	0.717938	0.757001	0.655741	0.661161	0.762611	0.624386	0.808338	0.634718	0.750761	0.844461	0.618439	0.75464	0.778389	0.736238	0.690685	0.632665	0.648524	0.674467	0.608759	0.726122	0.766374
	9.00196	0.52918	0.525626	0.636505	0.638202	0.596092	0.530045	0.647638	0.513227	0.764738	0.497289	0.475238	0.254358	0.720733	0.576342	0.619304	0.701325	0.451015	0.560412	0.632188	0.629756	0.728705	0.763832	0.803923	0.80667	0.696394	0.695186	0.816445	0.697877	0.740903	0.632928	0.641913	0.751135	0.60134	0.795254	0.608658	0.73629	0.833834	0.590763	0.742848	0.765559	0.726663	0.675016	0.614799	0.631846	0.651568	0.584816	0.707097	0.751925
	9.39335	0.506405	0.508127	0.613515	0.620526	0.573197	0.506397	0.625729	0.49036	0.758443	0.473496	0.457562	0.236905	0.711094	0.557778	0.595997	0.681814	0.423614	0.536138	0.609776	0.606448	0.713178	0.753282	0.793977	0.796079	0.678227	0.67561	0.80561	0.677797	0.724866	0.610168	0.623348	0.740493	0.578849	0.782184	0.582508	0.722183	0.823221	0.562959	0.73172	0.753188	0.718437	0.660164	0.598367	0.616227	0.62862	0.561146	0.688012	0.737758
	9.78474	0.484668	0.492361	0.590425	0.603757	0.550623	0.483606	0.603737	0.468227	0.753336	0.451095	0.442646	0.226741	0.702566	0.540282	0.573229	0.662348	0.396693	0.512438	0.587744	0.583244	0.69801	0.743615	0.784417	0.785765	0.660415	0.65605	0.794894	0.657715	0.708848	0.58738	0.605494	0.730642	0.55692	0.769134	0.556288	0.708424	0.812593	0.535076	0.721246	0.741259	0.711396	0.645856	0.583463	0.601541	0.60557	0.537668	0.668811	0.723826
	10.1761	0.463965	0.478241	0.567242	0.587933	0.52854	0.461679	0.581704	0.446676	0.74938	0.430183	0.430523	0.224026	0.695129	0.523941	0.551139	0.643031	0.370244	0.489395	0.566232	0.560209	0.683319	0.734931	0.775306	0.775763	0.643018	0.636645	0.784311	0.637719	0.692915	0.564613	0.588372	0.721676	0.535693	0.756112	0.530057	0.695025	0.802023	0.507193	0.711426	0.729889	0.705716	0.632339	0.570148	0.587817	0.582539	0.514318	0.649554	0.710215
	10.5675	0.444262	0.465609	0.543996	0.573053	0.50686	0.440563	0.559584	0.425564	0.746488	0.410744	0.421117	0.227969	0.688692	0.508602	0.529879	0.623878	0.344339	0.467015	0.545302	0.537357	0.669104	0.727239	0.766609	0.766047	0.626073	0.617388	0.773836	0.617842	0.677022	0.54181	0.571966	0.713543	0.51518	0.743107	0.503858	0.681947	0.791484	0.479393	0.70219	0.719048	0.701216	0.61947	0.558429	0.574915	0.559543	0.490975	0.630204	0.696887
	10.9589	0.425541	0.454291	0.520691	0.55912	0.485647	0.420236	0.537328	0.404799	0.744552	0.392789	0.414267	0.237321	0.683165	0.494218	0.509598	0.604955	0.318792	0.445331	0.525049	0.514722	0.655421	0.720574	0.758338	0.756618	0.609609	0.598321	0.763458	0.598136	0.661185	0.518947	0.556252	0.706242	0.495448	0.730117	0.477729	0.669164	0.78101	0.451728	0.693479	0.708796	0.697899	0.607239	0.548279	0.562746	0.536602	0.467555	0.610761	0.683855
	11.3503	0.40782	0.444111	0.497463	0.546138	0.464944	0.400721	0.515013	0.384381	0.743442	0.376304	0.40973	0.250437	0.678455	0.480708	0.490464	0.58631	0.294046	0.424431	0.505585	0.492379	0.642308	0.714938	0.750487	0.747467	0.593655	0.579527	0.753164	0.578674	0.645423	0.496069	0.54121	0.699754	0.476575	0.71715	0.451756	0.656658	0.770611	0.424311	0.685209	0.699127	0.695675	0.595726	0.539633	0.551261	0.513824	0.44403	0.591265	0.671139
	11.7417	0.391143	0.434904	0.474373	0.534111	0.444742	0.382037	0.492581	0.364364	0.74302	0.361239	0.407208	0.265778	0.674447	0.467929	0.472634	0.567966	0.270037	0.404345	0.486973	0.470367	0.62976	0.710295	0.743024	0.738584	0.578219	0.560967	0.742945	0.559493	0.629726	0.473141	0.526808	0.693989	0.458583	0.704221	0.425985	0.644395	0.76028	0.397194	0.677298	0.690026	0.694367	0.584702	0.532391	0.540327	0.491166	0.420394	0.571693	0.658695
	12.1331	0.375611	0.42655	0.451585	0.523071	0.425229	0.364301	0.470184	0.34489	0.743154	0.347594	0.406373	0.282016	0.671076	0.45589	0.456263	0.549999	0.24723	0.385226	0.469358	0.448816	0.617842	0.706635	0.735979	0.729993	0.563321	0.542772	0.732826	0.540695	0.614183	0.450293	0.513038	0.688959	0.441616	0.691372	0.400523	0.632391	0.750062	0.370484	0.669689	0.681522	0.693984	0.574372	0.526439	0.529988	0.468767	0.396748	0.552147	0.646592
	12.5245	0.361331	0.418944	0.429218	0.513036	0.406401	0.347591	0.447829	0.32611	0.743714	0.335284	0.406881	0.298053	0.668243	0.44443	0.441486	0.532414	0.225849	0.367132	0.452791	0.427801	0.606517	0.703872	0.729309	0.72169	0.548955	0.524893	0.722819	0.522325	0.598801	0.42754	0.499879	0.684538	0.425691	0.678644	0.375433	0.620629	0.739929	0.344254	0.662313	0.673541	0.694259	0.564471	0.521634	0.520144	0.446596	0.373185	0.532629	0.634779
	12.9159	0.348444	0.412028	0.407375	0.504045	0.388506	0.332047	0.425637	0.308186	0.744587	0.324287	0.40841	0.313157	0.665896	0.433591	0.428408	0.515287	0.206051	0.350212	0.437396	0.407464	0.595847	0.70197	0.723047	0.713716	0.53512	0.507429	0.712974	0.504485	0.583694	0.40502	0.487325	0.680721	0.410957	0.666095	0.3508	0.609138	0.729935	0.318575	0.655149	0.666117	0.69522	0.555134	0.517832	0.510856	0.424741	0.349866	0.513245	0.623323
	13.3072	0.337068	0.40575	0.386179	0.496113	0.371609	0.317764	0.403693	0.291237	0.745668	0.314493	0.410659	0.326711	0.663959	0.423256	0.41711	0.49863	0.188218	0.334552	0.423221	0.387911	0.585799	0.700821	0.717165	0.706078	0.521799	0.490378	0.703327	0.487243	0.568908	0.382809	0.475356	0.677402	0.397453	0.65378	0.326695	0.597919	0.720062	0.293532	0.64816	0.659167	0.696639	0.546229	0.514871	0.502087	0.403232	0.326922	0.49404	0.612203
	13.6986	0.327308	0.400068	0.365649	0.489251	0.355911	0.304823	0.382019	0.275307	0.746864	0.305822	0.413367	0.338435	0.662361	0.413415	0.407625	0.482488	0.172195	0.32023	0.410323	0.369252	0.576392	0.700346	0.711668	0.698799	0.508966	0.473757	0.693927	0.470674	0.554528	0.360977	0.463943	0.674521	0.385265	0.641747	0.303157	0.586983	0.710338	0.269158	0.641343	0.652685	0.698466	0.537697	0.512592	0.493823	0.382071	0.304463	0.47507	0.601429
	14.09	0.319228	0.394927	0.345868	0.483442	0.341553	0.293274	0.360718	0.260381	0.748083	0.298146	0.416298	0.348085	0.661029	0.404014	0.399953	0.466892	0.158223	0.307329	0.398738	0.351605	0.567621	0.700446	0.706547	0.691888	0.496589	0.457621	0.684815	0.454864	0.54063	0.339628	0.453049	0.672014	0.374445	0.630038	0.280241	0.576336	0.700771	0.245528	0.634686	0.646614	0.70059	0.529583	0.510836	0.486064	0.361341	0.282572	0.45641	0.591017
	14.4814	0.31284	0.390241	0.326834	0.478637	0.328623	0.283087	0.33973	0.246349	0.749236	0.291309	0.419243	0.355612	0.659848	0.394946	0.394059	0.451849	0.146156	0.295836	0.388437	0.335032	0.559452	0.700996	0.701762	0.685329	0.484616	0.441913	0.676012	0.439856	0.527242	0.318752	0.442608	0.66976	0.364982	0.618673	0.257952	0.56595	0.69135	0.222662	0.628175	0.640893	0.702847	0.521659	0.50944	0.478687	0.340987	0.261242	0.438052	0.580908
	14.8728	0.308115	0.3859	0.308595	0.474775	0.317295	0.274231	0.319114	0.233065	0.750228	0.285167	0.422004	0.360999	0.658725	0.386194	0.389874	0.4374	0.135961	0.285792	0.379424	0.319639	0.551903	0.701909	0.697312	0.679113	0.473001	0.426704	0.667544	0.425737	0.514445	0.298431	0.432553	0.66772	0.356912	0.607666	0.236322	0.555819	0.6821	0.200614	0.621803	0.635497	0.705228	0.51405	0.508251	0.471672	0.3211	0.240463	0.420066	0.571124
	15.2642	0.304961	0.381752	0.291219	0.47175	0.30755	0.266577	0.298801	0.220348	0.750957	0.279508	0.424383	0.364232	0.657512	0.377583	0.387308	0.423524	0.127782	0.277122	0.371603	0.305462	0.544906	0.703041	0.693125	0.673187	0.46168	0.411917	0.659401	0.412535	0.502224	0.278629	0.422788	0.665748	0.350139	0.597011	0.215355	0.545892	0.672984	0.179428	0.615531	0.630323	0.707503	0.506507	0.507114	0.46484	0.301635	0.220149	0.402421	0.561572
	15.6556	0.303262	0.377632	0.274775	0.46946	0.299521	0.260015	0.278786	0.208029	0.751319	0.274171	0.426184	0.365366	0.65609	0.369089	0.386241	0.410255	0.12147	0.269804	0.364928	0.29258	0.538478	0.704305	0.689188	0.667523	0.450595	0.397591	0.651584	0.400321	0.490636	0.259392	0.413225	0.663798	0.344646	0.586701	0.195074	0.536146	0.664027	0.15915	0.609336	0.625356	0.709686	0.499093	0.505892	0.458121	0.282645	0.200235	0.385155	0.552242
	16.047	0.302859	0.373362	0.259439	0.467779	0.293128	0.25438	0.259069	0.195982	0.751204	0.268937	0.427211	0.364333	0.654325	0.360555	0.386543	0.39757	0.117289	0.263744	0.359279	0.281033	0.532556	0.705568	0.685435	0.662056	0.439688	0.383687	0.64407	0.389131	0.47967	0.24073	0.40377	0.661752	0.340305	0.576722	0.175517	0.526537	0.655192	0.13988	0.603164	0.620492	0.711584	0.491688	0.504451	0.451373	0.264152	0.180649	0.368268	0.54306
	16.4384	0.30359	0.368791	0.245349	0.466592	0.288402	0.249522	0.239612	0.184126	0.750513	0.263648	0.42728	0.361163	0.652098	0.351938	0.388062	0.385477	0.115119	0.258862	0.354557	0.270869	0.527133	0.706735	0.681832	0.656741	0.428902	0.370185	0.636844	0.379011	0.469351	0.222673	0.394345	0.659538	0.337031	0.567064	0.156729	0.517042	0.646482	0.12171	0.596979	0.6157	0.713153	0.484219	0.50268	0.444494	0.246169	0.161349	0.351769	0.533975
	16.8298	0.305289	0.363803	0.232725	0.465796	0.285255	0.245307	0.220499	0.172455	0.749154	0.25814	0.426235	0.355787	0.649327	0.34318	0.390638	0.373972	0.114854	0.255085	0.350655	0.262143	0.522181	0.707705	0.678344	0.651533	0.418197	0.35711	0.629893	0.370013	0.459703	0.205329	0.384893	0.657099	0.334714	0.557727	0.138812	0.507654	0.637886	0.104831	0.590739	0.610907	0.714319	0.476744	0.50049	0.437455	0.228801	0.142354	0.335716	0.524962
	17.2211	0.307803	0.358338	0.221759	0.465303	0.28359	0.241601	0.20172	0.161002	0.747057	0.252288	0.423958	0.348219	0.645937	0.334237	0.394102	0.363036	0.11633	0.252298	0.347441	0.254874	0.517662	0.708376	0.674928	0.646387	0.407533	0.344402	0.623205	0.362163	0.450731	0.188759	0.375373	0.654348	0.333221	0.548713	0.121881	0.498369	0.629383	0.0894985	0.584414	0.606052	0.714966	0.469094	0.497812	0.430178	0.212063	0.123691	0.320116	0.515949
	17.6125	0.311011	0.352409	0.212603	0.46506	0.283338	0.238337	0.183399	0.149847	0.744175	0.246026	0.420386	0.338506	0.641911	0.325185	0.398275	0.352682	0.118979	0.250457	0.344838	0.249113	0.513588	0.708686	0.671589	0.641291	0.396895	0.332124	0.616791	0.355519	0.442499	0.173163	0.365784	0.65129	0.332482	0.540042	0.106149	0.489227	0.620989	0.0761124	0.577997	0.60111	0.715139	0.461429	0.494613	0.42274	0.196124	0.105465	0.305071	0.506954
	18.0039	0.314814	0.346083	0.205403	0.465025	0.284306	0.235438	0.165598	0.139072	0.740487	0.239297	0.415509	0.326728	0.637235	0.316019	0.402989	0.342877	0.122535	0.249452	0.342716	0.244846	0.509911	0.708542	0.668289	0.636215	0.386268	0.320224	0.610655	0.350092	0.43501	0.158683	0.35614	0.647856	0.332358	0.531733	0.091908	0.480256	0.612672	0.0652902	0.571484	0.596002	0.71471	0.453608	0.490879	0.415138	0.181072	0.0877617	0.290614	0.497921
	18.3953	0.319157	0.339493	0.200174	0.465192	0.28644	0.2329	0.148431	0.128738	0.736001	0.232136	0.40938	0.313115	0.63194	0.306901	0.408072	0.333639	0.12644	0.24925	0.341016	0.24209	0.506655	0.707903	0.665055	0.631166	0.375663	0.308759	0.604827	0.345926	0.428337	0.145576	0.346487	0.644078	0.332814	0.523812	0.0796169	0.471524	0.604458	0.0578058	0.564911	0.590732	0.713773	0.445754	0.486632	0.40749	0.167125	0.0706986	0.276847	0.488878
	18.7867	0.324	0.332807	0.196926	0.46556	0.289525	0.230707	0.132051	0.118874	0.730743	0.224562	0.40209	0.297888	0.62606	0.297897	0.413372	0.324934	0.130379	0.249772	0.33964	0.2408	0.503786	0.706705	0.661874	0.626132	0.365096	0.297729	0.599327	0.343022	0.422495	0.134084	0.336885	0.639939	0.333742	0.516303	0.0699325	0.463089	0.596324	0.0544133	0.558307	0.585236	0.712265	0.437859	0.481912	0.399873	0.154505	0.0543729	0.263843	0.479809
	19.1781	0.329331	0.326213	0.195568	0.466142	0.293493	0.228876	0.116584	0.109438	0.72476	0.21667	0.393768	0.281436	0.619633	0.28918	0.41875	0.316764	0.134168	0.250971	0.338533	0.240932	0.501318	0.704916	0.658762	0.621118	0.354597	0.287151	0.594184	0.341386	0.417526	0.124479	0.327407	0.635461	0.33511	0.509222	0.0636634	0.455023	0.588283	0.0552756	0.551731	0.579517	0.710244	0.429924	0.476779	0.392373	0.143488	0.0388719	0.251673	0.470716
	19.5695	0.33514	0.3199	0.195981	0.46695	0.298175	0.227428	0.102308	0.10035	0.718107	0.208544	0.384553	0.264136	0.612711	0.280882	0.424082	0.309107	0.137531	0.252799	0.337638	0.242417	0.499242	0.702508	0.655733	0.616121	0.344213	0.277085	0.58942	0.34101	0.413453	0.117046	0.318137	0.630687	0.336862	0.502581	0.0615186	0.447396	0.580334	0.0597157	0.545232	0.573548	0.707752	0.42208	0.471309	0.385109	0.134442	0.0243782	0.240432	0.461624
	19.9609	0.34141	0.314037	0.198052	0.467984	0.303459	0.226355	0.0894957	0.0914792	0.710844	0.200285	0.374582	0.246472	0.605317	0.273124	0.429269	0.301938	0.140592	0.255176	0.336892	0.245154	0.497542	0.699448	0.652779	0.611126	0.333996	0.267521	0.585047	0.341855	0.410264	0.111968	0.309153	0.625618	0.33894	0.496375	0.0636103	0.440264	0.572464	0.0666549	0.538865	0.567314	0.704773	0.414232	0.465582	0.37811	0.127678	0.0117762	0.230155	0.452504
	20.3523	0.348109	0.30877	0.201611	0.469243	0.309243	0.22567	0.078677	0.0826897	0.703029	0.19201	0.363981	0.228969	0.597495	0.266073	0.434221	0.295244	0.143209	0.258067	0.336275	0.249055	0.496233	0.695742	0.649929	0.606128	0.324018	0.258554	0.581075	0.343893	0.407975	0.109395	0.300547	0.620329	0.341324	0.490597	0.0693456	0.433696	0.564691	0.0750943	0.532678	0.560828	0.701422	0.406562	0.459687	0.371489	0.12357	0.00926298	0.220932	0.443396
	20.7436	0.355172	0.304204	0.206542	0.470701	0.315362	0.225327	0.0704734	0.0738626	0.694717	0.183802	0.352852	0.212188	0.589259	0.259784	0.438868	0.288975	0.145522	0.261362	0.335726	0.253984	0.495275	0.691364	0.647157	0.601095	0.314355	0.250178	0.577492	0.347052	0.406526	0.109242	0.292399	0.614822	0.343927	0.485224	0.0777432	0.427727	0.556985	0.0843622	0.526697	0.554058	0.697644	0.398985	0.453708	0.365253	0.122275	0.0196503	0.212777	0.434266
	21.135	0.362517	0.300423	0.21268	0.472336	0.321753	0.225304	0.0656548	0.0649152	0.68596	0.175784	0.341284	0.196821	0.580642	0.254405	0.443149	0.283116	0.147555	0.265012	0.335245	0.259839	0.494684	0.686333	0.644485	0.596017	0.305104	0.242486	0.574289	0.35128	0.405903	0.11135	0.284803	0.609174	0.346732	0.480235	0.0879334	0.422413	0.549367	0.0940358	0.520951	0.547041	0.693551	0.391621	0.447734	0.359483	0.123878	0.031621	0.205747	0.425144
	21.5264	0.370031	0.297477	0.21987	0.474109	0.328222	0.225538	0.0647416	0.0558303	0.676808	0.168033	0.329354	0.183563	0.571679	0.249951	0.447008	0.277609	0.149253	0.26891	0.334795	0.266478	0.494417	0.680647	0.641896	0.590865	0.296371	0.235516	0.57144	0.356489	0.406031	0.115362	0.277847	0.603416	0.349647	0.475608	0.0992603	0.417782	0.541812	0.103848	0.515438	0.539748	0.689119	0.384493	0.441848	0.354218	0.128176	0.0434964	0.199848	0.416023
	21.9178	0.377596	0.295401	0.227954	0.475992	0.334702	0.225987	0.067676	0.0466343	0.667315	0.160675	0.317148	0.173255	0.562414	0.246507	0.4504	0.272425	0.150722	0.272983	0.334381	0.273792	0.494469	0.674327	0.639397	0.585626	0.28827	0.22933	0.568924	0.362604	0.406862	0.120918	0.271626	0.597603	0.352633	0.47132	0.111311	0.413871	0.534328	0.113658	0.510159	0.532214	0.684398	0.377608	0.436136	0.349513	0.134879	0.0550452	0.195086	0.406915
	22.3092	0.38509	0.294216	0.236732	0.477957	0.341023	0.22661	0.0738204	0.0374131	0.657543	0.15381	0.304764	0.166623	0.552923	0.244074	0.453278	0.267512	0.151751	0.277157	0.33401	0.281662	0.494813	0.667403	0.636995	0.580294	0.280932	0.224015	0.566718	0.369542	0.408331	0.127621	0.26624	0.591813	0.355627	0.467361	0.123807	0.410712	0.526914	0.12335	0.5051	0.524439	0.679442	0.371106	0.430683	0.345468	0.143581	0.0661542	0.191461	0.397862
	22.7006	0.392406	0.293932	0.246049	0.479991	0.347086	0.227373	0.0822468	0.0282766	0.647563	0.147563	0.292329	0.16426	0.54328	0.242643	0.455605	0.26282	0.152403	0.281353	0.333691	0.289979	0.495415	0.659895	0.634682	0.574866	0.274479	0.219598	0.5648	0.377211	0.410367	0.135115	0.261779	0.586083	0.35857	0.46372	0.136576	0.408322	0.51956	0.132875	0.500247	0.516438	0.674234	0.364917	0.42557	0.342128	0.153867	0.0767592	0.188918	0.38887
	23.092	0.399465	0.29456	0.255712	0.482098	0.3528	0.228288	0.0921937	0.0193658	0.637464	0.142064	0.280005	0.16634	0.533599	0.242214	0.457345	0.258315	0.152512	0.285546	0.333473	0.298668	0.496268	0.651861	0.63249	0.569366	0.269045	0.216185	0.563162	0.385543	0.412933	0.143125	0.258335	0.580523	0.361447	0.4604	0.149512	0.406732	0.512289	0.142183	0.495589	0.508249	0.668893	0.359218	0.420882	0.339628	0.165395	0.0867825	0.187439	0.380018
	23.4834	0.406211	0.296094	0.26558	0.484285	0.358047	0.229354	0.103027	0.010949	0.627341	0.137422	0.267979	0.172583	0.523985	0.242695	0.458473	0.253931	0.152038	0.289673	0.333371	0.307634	0.497317	0.64333	0.630412	0.563803	0.264741	0.213777	0.561791	0.394446	0.415951	0.151386	0.255975	0.575173	0.364201	0.457404	0.162535	0.405944	0.505085	0.151248	0.491112	0.49987	0.663384	0.353951	0.416694	0.338014	0.177813	0.0961772	0.18693	0.37133
	23.8748	0.412629	0.298528	0.275529	0.486581	0.362822	0.230627	0.114402	0.004798	0.617306	0.133758	0.25647	0.182342	0.514562	0.244065	0.45897	0.249644	0.151012	0.293741	0.333459	0.316838	0.498559	0.634371	0.628481	0.558217	0.261671	0.212449	0.560692	0.403863	0.419403	0.159759	0.254752	0.570136	0.366853	0.454738	0.175617	0.405969	0.497978	0.160063	0.486818	0.491362	0.657826	0.349219	0.413081	0.337394	0.190911	0.104928	0.187338	0.362889
	24.2661	0.418718	0.30184	0.285453	0.489003	0.367032	0.232139	0.126032	0.00856618	0.607472	0.131123	0.245703	0.194742	0.505445	0.246189	0.458825	0.245389	0.149339	0.297721	0.333765	0.326215	0.49994	0.625036	0.626698	0.55263	0.259905	0.212189	0.55986	0.413713	0.423226	0.168083	0.254687	0.565469	0.369374	0.452408	0.188724	0.406792	0.490962	0.168606	0.4827	0.482728	0.652223	0.34504	0.4101	0.337809	0.204437	0.113048	0.188557	0.354749
	24.6575	0.424496	0.305994	0.295307	0.491578	0.370716	0.233948	0.137791	0.0162485	0.597952	0.129566	0.235902	0.208954	0.496735	0.249009	0.458042	0.241138	0.147209	0.301615	0.33435	0.335738	0.501438	0.61539	0.625078	0.547076	0.259481	0.213001	0.559299	0.423937	0.427391	0.176301	0.255769	0.561238	0.371788	0.450412	0.201854	0.408388	0.484055	0.17689	0.478767	0.474027	0.646633	0.341388	0.407799	0.33928	0.218262	0.12061	0.190496	0.34697
	25.0489	0.429976	0.310931	0.305027	0.494315	0.373838	0.236098	0.14958	0.024391	0.588855	0.129049	0.227272	0.224186	0.48853	0.252388	0.456625	0.236841	0.144571	0.305418	0.335258	0.345369	0.503014	0.605507	0.623629	0.541579	0.260404	0.214864	0.559006	0.434472	0.431857	0.184343	0.257958	0.557514	0.3741	0.448743	0.214998	0.410717	0.477268	0.184906	0.475017	0.465282	0.641116	0.338347	0.406203	0.341823	0.232231	0.127694	0.193061	0.339629
	25.4403	0.435159	0.316562	0.314605	0.497207	0.376419	0.238604	0.161332	0.032767	0.580274	0.129516	0.21998	0.239865	0.48089	0.256211	0.454593	0.232454	0.141604	0.309096	0.336517	0.35507	0.504619	0.595446	0.622333	0.536152	0.262632	0.217702	0.558968	0.44525	0.436569	0.192174	0.261173	0.554312	0.376304	0.447385	0.228148	0.413714	0.470599	0.192661	0.471447	0.456531	0.635651	0.335793	0.405317	0.345357	0.246232	0.13442	0.19613	0.332756
	25.8317	0.440022	0.322771	0.324008	0.500237	0.378478	0.24148	0.173035	0.0413894	0.572289	0.130852	0.214146	0.255495	0.473874	0.260363	0.451962	0.227946	0.138358	0.312646	0.33817	0.364813	0.506228	0.585296	0.621198	0.530816	0.266098	0.221485	0.559171	0.45622	0.441493	0.19978	0.265316	0.55169	0.378423	0.446319	0.241302	0.417309	0.464071	0.200158	0.46805	0.447824	0.630324	0.333805	0.405124	0.349845	0.260188	0.140891	0.199625	0.326428
	26.2231	0.44451	0.329405	0.333206	0.503363	0.379982	0.244685	0.184613	0.0502635	0.564957	0.132917	0.209825	0.270741	0.467506	0.264672	0.448755	0.223262	0.134853	0.316002	0.340212	0.374536	0.507771	0.575114	0.620183	0.525567	0.270692	0.226085	0.559585	0.467302	0.446552	0.207111	0.270252	0.549631	0.380414	0.445515	0.254433	0.421402	0.457669	0.207388	0.4648	0.439176	0.625069	0.332251	0.405583	0.355139	0.273982	0.147193	0.203416	0.320658
	26.6145	0.44855	0.336288	0.342176	0.506538	0.380968	0.248184	0.196071	0.059363	0.558319	0.135561	0.207011	0.285337	0.461807	0.269036	0.444995	0.21838	0.131202	0.319137	0.342671	0.384202	0.509226	0.564989	0.619279	0.520416	0.276289	0.231445	0.56018	0.478446	0.451709	0.214165	0.275842	0.548152	0.382289	0.444947	0.267533	0.425903	0.451418	0.214358	0.461675	0.430648	0.619943	0.331128	0.406633	0.361142	0.287577	0.153386	0.20743	0.3155
	27.0059	0.452045	0.343223	0.350846	0.509702	0.381362	0.251899	0.20733	0.068611	0.552394	0.138601	0.205629	0.299054	0.456778	0.273265	0.440706	0.213247	0.127272	0.321985	0.345523	0.393739	0.510525	0.554987	0.618447	0.515362	0.282743	0.237433	0.560916	0.489579	0.456883	0.220878	0.281929	0.547223	0.383993	0.444588	0.280562	0.430697	0.445306	0.221045	0.458628	0.422248	0.614897	0.33037	0.408197	0.367701	0.300866	0.159481	0.211557	0.310969
	27.3973	0.454903	0.350014	0.359183	0.512801	0.381181	0.255764	0.218368	0.0779161	0.547187	0.141881	0.205548	0.311729	0.452411	0.277255	0.435913	0.207842	0.123151	0.3245	0.348767	0.403093	0.511635	0.545183	0.617657	0.510412	0.2899	0.243959	0.561756	0.500642	0.462028	0.227234	0.28836	0.546812	0.385509	0.444412	0.293498	0.435683	0.439346	0.227448	0.455621	0.41403	0.609918	0.32987	0.410186	0.374677	0.313815	0.16548	0.215722	0.307083
	27.7887	0.45704	0.356477	0.367104	0.515784	0.380367	0.25971	0.229142	0.0871814	0.542692	0.145216	0.206591	0.323154	0.448702	0.280855	0.430641	0.202129	0.118709	0.32665	0.352379	0.412201	0.512509	0.535659	0.616886	0.505576	0.297608	0.250922	0.562663	0.511579	0.467091	0.233185	0.294988	0.54689	0.386807	0.444407	0.306308	0.44076	0.433543	0.233545	0.452603	0.40601	0.605011	0.329643	0.412503	0.381966	0.326352	0.171353	0.21986	0.303869
	28.18	0.458395	0.362453	0.374563	0.518612	0.378902	0.263676	0.239601	0.0963311	0.538887	0.14846	0.208554	0.333184	0.445624	0.283962	0.424922	0.196082	0.11395	0.328392	0.356329	0.421004	0.513098	0.526474	0.616093	0.500864	0.305713	0.258204	0.563605	0.522327	0.472022	0.238701	0.301673	0.547383	0.387851	0.444559	0.318963	0.445831	0.427896	0.239322	0.449532	0.398221	0.600102	0.329524	0.41505	0.389424	0.338422	0.177087	0.223903	0.301311
	28.5714	0.458944	0.367832	0.381512	0.521262	0.376791	0.267639	0.249755	0.105331	0.535751	0.151458	0.211225	0.341626	0.443168	0.28651	0.418792	0.18969	0.108895	0.329738	0.360602	0.429465	0.513383	0.517712	0.615268	0.496305	0.314078	0.265745	0.56456	0.532848	0.476804	0.24378	0.308302	0.548262	0.388649	0.444866	0.331448	0.450821	0.422428	0.244768	0.446373	0.390698	0.595239	0.329549	0.417735	0.397002	0.350003	0.182687	0.227832	0.299434
	28.9628	0.458688	0.372539	0.387908	0.523717	0.374004	0.271573	0.259561	0.114181	0.533248	0.154086	0.214399	0.348345	0.441298	0.288417	0.412289	0.182927	0.103497	0.330671	0.365146	0.437534	0.513313	0.509425	0.614371	0.491909	0.322568	0.27342	0.565508	0.543087	0.481396	0.248399	0.314772	0.549439	0.389173	0.445326	0.343738	0.45565	0.417128	0.249862	0.443094	0.38345	0.590339	0.329581	0.420467	0.404593	0.361025	0.18818	0.231601	0.298206
	29.3542	0.457664	0.376549	0.393751	0.525975	0.370612	0.275499	0.26906	0.122927	0.531346	0.156246	0.217894	0.353224	0.439984	0.289698	0.405462	0.175801	0.0979339	0.331226	0.369947	0.445198	0.512882	0.501685	0.613396	0.487707	0.331068	0.281189	0.566444	0.553015	0.485807	0.252604	0.321003	0.550865	0.389456	0.44594	0.355829	0.460268	0.412024	0.254608	0.439689	0.376523	0.585439	0.3296	0.423169	0.412166	0.371494	0.19364	0.235218	0.29763
	29.7456	0.455915	0.379861	0.399014	0.528033	0.366606	0.279429	0.278242	0.131633	0.530001	0.157852	0.221556	0.356171	0.439184	0.290313	0.398359	0.168295	0.092195	0.331416	0.374948	0.452426	0.51205	0.494538	0.612313	0.483713	0.339473	0.288954	0.567357	0.562591	0.490014	0.256399	0.326926	0.552461	0.389497	0.446705	0.367704	0.464617	0.407109	0.258985	0.436148	0.369915	0.580499	0.329556	0.425768	0.419661	0.381351	0.199142	0.238666	0.29767
	30.137	0.453495	0.382498	0.40372	0.529889	0.362076	0.283391	0.287134	0.140368	0.529163	0.15887	0.22526	0.35719	0.438837	0.290309	0.391036	0.160424	0.0864864	0.331264	0.380117	0.45921	0.510809	0.48803	0.611101	0.47994	0.347689	0.296663	0.568246	0.571784	0.494021	0.259838	0.332487	0.55415	0.389323	0.447616	0.379354	0.468653	0.402398	0.262999	0.432483	0.363666	0.575503	0.329342	0.4282	0.42702	0.390596	0.20479	0.241951	0.298287
	30.5284	0.450442	0.38448	0.407861	0.531534	0.357058	0.287403	0.295761	0.149184	0.528777	0.15926	0.228909	0.356278	0.438884	0.289691	0.383547	0.15219	0.0808968	0.330798	0.385402	0.465532	0.509144	0.482202	0.609743	0.476396	0.355638	0.304262	0.569107	0.580565	0.497823	0.262957	0.337637	0.555868	0.388954	0.448662	0.390766	0.472334	0.397897	0.266643	0.428706	0.357777	0.570468	0.328982	0.430408	0.434208	0.399203	0.21066	0.24508	0.299449
	30.9198	0.446773	0.385814	0.411438	0.532943	0.351602	0.291459	0.304105	0.158094	0.528774	0.159034	0.232423	0.353535	0.439237	0.288476	0.375945	0.143604	0.0755132	0.330008	0.390743	0.471366	0.507031	0.477068	0.6082	0.47307	0.363247	0.311676	0.569926	0.588895	0.5014	0.265779	0.342325	0.557513	0.388388	0.449822	0.401912	0.475612	0.393599	0.26991	0.424834	0.352265	0.565327	0.328326	0.432335	0.441126	0.407145	0.216805	0.248035	0.301078
	31.3112	0.442485	0.386487	0.414451	0.534091	0.345774	0.29555	0.312194	0.167078	0.529079	0.158192	0.235729	0.34904	0.43982	0.286696	0.368282	0.134688	0.0705001	0.328915	0.396093	0.476695	0.504478	0.472654	0.60646	0.469961	0.370456	0.318882	0.570695	0.59675	0.504753	0.268347	0.346504	0.559028	0.387649	0.451076	0.412775	0.478453	0.389518	0.272804	0.420886	0.347141	0.56012	0.327407	0.43393	0.447734	0.414428	0.223245	0.250831	0.303135
	31.7025	0.437548	0.386458	0.416863	0.534934	0.339567	0.29962	0.319975	0.176069	0.529604	0.156755	0.238756	0.342915	0.440535	0.284321	0.360603	0.125448	0.0658203	0.327491	0.401372	0.481471	0.501455	0.468949	0.60448	0.467041	0.37721	0.325795	0.571388	0.604083	0.507842	0.270644	0.350119	0.560308	0.386705	0.452396	0.42331	0.480805	0.385636	0.275305	0.41687	0.342392	0.554771	0.326116	0.43514	0.453926	0.421003	0.22995	0.253438	0.305523
	32.0939	0.431924	0.385677	0.418666	0.535434	0.333044	0.303625	0.327449	0.184984	0.530261	0.154742	0.241428	0.335275	0.441297	0.281384	0.352954	0.115921	0.0616292	0.325739	0.406532	0.485666	0.497977	0.465953	0.602246	0.464298	0.383467	0.3324	0.571986	0.610872	0.510662	0.272693	0.353125	0.561289	0.385563	0.453757	0.433492	0.482638	0.381964	0.277419	0.412799	0.338037	0.5493	0.324432	0.435916	0.459645	0.426889	0.236875	0.25586	0.308186
	32.4853	0.425571	0.384087	0.419808	0.535549	0.326167	0.307493	0.334568	0.193728	0.530951	0.152159	0.243666	0.326192	0.442025	0.277845	0.345373	0.106124	0.0579342	0.323648	0.411492	0.489229	0.494028	0.46364	0.599727	0.461705	0.389189	0.338632	0.572461	0.617076	0.513174	0.274466	0.355472	0.561889	0.38419	0.455138	0.443277	0.483913	0.378485	0.279124	0.40867	0.334043	0.543671	0.322341	0.436213	0.464827	0.432049	0.243944	0.258082	0.311039
	32.8767	0.418461	0.381644	0.420272	0.53525	0.31897	0.311165	0.3413	0.202223	0.531585	0.149025	0.24539	0.315763	0.442644	0.273729	0.337899	0.0961017	0.0548473	0.321214	0.416202	0.492121	0.489615	0.461978	0.596907	0.459244	0.394348	0.344459	0.57279	0.622667	0.515366	0.275961	0.357124	0.562033	0.382573	0.456518	0.452634	0.484608	0.3752	0.280418	0.404488	0.33042	0.537861	0.319759	0.43599	0.469417	0.436485	0.251095	0.260095	0.314006
	33.2681	0.410591	0.378331	0.42003	0.53452	0.311442	0.314601	0.347637	0.210418	0.532073	0.145332	0.24653	0.304009	0.443108	0.269043	0.330569	0.0859054	0.0525792	0.318466	0.420602	0.49431	0.484751	0.460933	0.593784	0.456901	0.398927	0.349854	0.572952	0.627623	0.517227	0.277176	0.358058	0.561675	0.380709	0.457886	0.461537	0.484711	0.372105	0.281292	0.400247	0.327132	0.531899	0.316755	0.435218	0.473421	0.440199	0.258274	0.261918	0.317031
	33.6595	0.401981	0.374168	0.419066	0.533355	0.303585	0.317765	0.353539	0.218292	0.532341	0.141099	0.247032	0.290993	0.44337	0.263811	0.323417	0.0756023	0.0512362	0.315414	0.424638	0.495763	0.479434	0.460449	0.590343	0.454659	0.402913	0.354767	0.572933	0.631917	0.51874	0.2781	0.35826	0.560744	0.378577	0.459235	0.469957	0.484216	0.369186	0.281735	0.395948	0.324169	0.525736	0.313237	0.433877	0.476812	0.443173	0.265452	0.263545	0.320033
	34.0509	0.392688	0.369215	0.417396	0.531771	0.295447	0.320669	0.359035	0.225865	0.532326	0.136331	0.246869	0.276748	0.443419	0.258115	0.316481	0.0653117	0.0510979	0.312121	0.428282	0.496479	0.473699	0.460484	0.586607	0.452516	0.406311	0.359207	0.572729	0.635544	0.519924	0.278774	0.357742	0.559224	0.37621	0.460564	0.477888	0.483142	0.366452	0.281754	0.391598	0.321505	0.519441	0.309276	0.431961	0.479648	0.445442	0.272632	0.265018	0.32298
	34.4423	0.38278	0.363561	0.415018	0.529786	0.287023	0.323319	0.364106	0.233173	0.53198	0.131064	0.246041	0.261335	0.443242	0.251994	0.309789	0.0551932	0.052214	0.308624	0.431485	0.496442	0.467548	0.460969	0.582574	0.45046	0.409126	0.363123	0.572335	0.638486	0.520771	0.279202	0.356519	0.557064	0.373603	0.461871	0.48531	0.481502	0.363882	0.28134	0.387204	0.319106	0.512984	0.304843	0.429473	0.481945	0.446988	0.279823	0.266347	0.325805
	34.8337	0.372344	0.357327	0.411974	0.527435	0.2784	0.325757	0.368784	0.240266	0.531269	0.12535	0.244581	0.244861	0.442845	0.245565	0.30337	0.0455577	0.0545635	0.30499	0.434237	0.495668	0.461022	0.461852	0.578275	0.448489	0.411378	0.366528	0.571763	0.640745	0.521312	0.279442	0.354623	0.554259	0.370795	0.463156	0.49222	0.479333	0.361486	0.280506	0.382793	0.31696	0.506427	0.299948	0.426429	0.483764	0.447852	0.287056	0.26757	0.328486
	35.2251	0.361462	0.350634	0.408278	0.524743	0.269595	0.328015	0.373081	0.247185	0.530172	0.119264	0.242539	0.227433	0.442241	0.238891	0.297245	0.0369571	0.0580461	0.301273	0.436503	0.494162	0.454138	0.463064	0.573729	0.44659	0.413088	0.369398	0.571019	0.642316	0.52155	0.279523	0.352091	0.550797	0.367807	0.464415	0.498606	0.476663	0.359245	0.279251	0.378383	0.315016	0.499796	0.294642	0.422851	0.485152	0.448036	0.294344	0.268713	0.33098
	35.6164	0.350201	0.343601	0.40396	0.521739	0.260684	0.330121	0.376996	0.25395	0.528677	0.112926	0.239984	0.209237	0.441436	0.232063	0.291425	0.0304538	0.062338	0.297518	0.438273	0.491935	0.446927	0.464542	0.568959	0.44475	0.414285	0.371724	0.570113	0.643196	0.521502	0.279482	0.348957	0.546665	0.364657	0.46564	0.504453	0.473526	0.357157	0.277584	0.37401	0.313265	0.493112	0.288874	0.418765	0.486132	0.44756	0.301688	0.269786	0.333256
	36.0078	0.338611	0.33633	0.399043	0.518439	0.25171	0.332094	0.380555	0.260551	0.526776	0.106469	0.236985	0.190438	0.44045	0.22515	0.285916	0.0277029	0.0672744	0.293781	0.439531	0.489002	0.439423	0.466225	0.564002	0.442953	0.415004	0.373514	0.569052	0.643392	0.52118	0.279356	0.345257	0.541884	0.361375	0.466817	0.509749	0.469956	0.355214	0.275514	0.369702	0.311659	0.48645	0.282738	0.414201	0.486756	0.446454	0.309067	0.270817	0.335296
	36.3992	0.326713	0.328893	0.393527	0.514849	0.242696	0.333919	0.383721	0.266943	0.524464	0.100089	0.2336	0.171249	0.439283	0.218182	0.280712	0.0298067	0.0725789	0.290077	0.440254	0.485356	0.431642	0.468041	0.558873	0.441169	0.415275	0.374734	0.567838	0.642893	0.520574	0.279139	0.341019	0.536441	0.357945	0.467926	0.514468	0.465973	0.353396	0.273036	0.365491	0.310177	0.479798	0.276176	0.409183	0.487013	0.444714	0.316424	0.27179	0.337052
	36.7906	0.314514	0.321347	0.387429	0.510973	0.233693	0.335579	0.386503	0.273065	0.521738	0.0939958	0.229875	0.151863	0.437953	0.211219	0.275802	0.0359252	0.0780978	0.28645	0.44044	0.481006	0.42363	0.469939	0.553616	0.439378	0.415139	0.37541	0.56647	0.641708	0.519697	0.278856	0.336273	0.530371	0.354386	0.468946	0.518593	0.461609	0.351702	0.270163	0.361403	0.308787	0.473246	0.269262	0.403739	0.486939	0.442386	0.323697	0.272718	0.338517
	37.182	0.302004	0.313723	0.380733	0.506802	0.224674	0.337024	0.388857	0.278838	0.518592	0.0884618	0.22583	0.132455	0.436463	0.204247	0.271169	0.0443947	0.083776	0.282907	0.440062	0.475934	0.415397	0.471846	0.548249	0.437544	0.414629	0.375506	0.564937	0.639826	0.518522	0.278475	0.33104	0.523678	0.350669	0.469852	0.522096	0.456877	0.350102	0.266884	0.357451	0.307448	0.466785	0.262002	0.39789	0.486524	0.439462	0.330799	0.273584	0.339644
	37.5734	0.289178	0.306052	0.373452	0.502336	0.215673	0.338212	0.390763	0.284188	0.515022	0.0837854	0.221475	0.11321	0.43483	0.197309	0.266791	0.0540585	0.0894911	0.279475	0.439128	0.470141	0.406986	0.473714	0.542817	0.435644	0.413784	0.375038	0.563229	0.637255	0.517054	0.277994	0.32535	0.516396	0.346792	0.470624	0.52496	0.451802	0.348595	0.263206	0.353648	0.306145	0.460476	0.254411	0.391661	0.485789	0.435982	0.337659	0.274386	0.340421
	37.9648	0.276038	0.298368	0.365585	0.497573	0.206651	0.339098	0.392204	0.289061	0.511027	0.0802945	0.216803	0.094258	0.433075	0.190409	0.262647	0.0643212	0.0953245	0.276181	0.437625	0.46362	0.398419	0.475485	0.537354	0.433651	0.412642	0.374	0.561332	0.633996	0.515275	0.277393	0.319237	0.508561	0.342741	0.471243	0.52717	0.446404	0.347155	0.259126	0.349989	0.304826	0.45435	0.246577	0.385077	0.484766	0.431961	0.344211	0.275129	0.340821
	38.3562	0.262607	0.290722	0.357151	0.492525	0.197611	0.339647	0.393146	0.293423	0.506613	0.0783143	0.211812	0.0757951	0.431223	0.183574	0.258715	0.0748529	0.101209	0.273044	0.435565	0.456371	0.389726	0.477108	0.531902	0.431545	0.41124	0.372386	0.559233	0.630055	0.513183	0.276657	0.312746	0.500209	0.338502	0.471697	0.528714	0.440707	0.345772	0.254642	0.346473	0.303482	0.448423	0.238477	0.378167	0.483474	0.42742	0.350414	0.275803	0.340823
	38.7475	0.24893	0.283184	0.348188	0.487213	0.188548	0.339854	0.393611	0.297278	0.501794	0.078093	0.206506	0.058055	0.429321	0.176862	0.254973	0.0854765	0.107186	0.270116	0.432964	0.448412	0.380944	0.478545	0.526517	0.429318	0.409619	0.370224	0.556927	0.625451	0.510784	0.2758	0.305934	0.491411	0.334093	0.471979	0.529598	0.434745	0.344435	0.249763	0.343084	0.302065	0.442772	0.230238	0.370969	0.481989	0.422406	0.356254	0.276437	0.340434
	39.1389	0.235069	0.275845	0.338727	0.481666	0.179443	0.339717	0.393576	0.300643	0.496596	0.079776	0.200907	0.0415867	0.427409	0.170299	0.2514	0.0960771	0.113246	0.267421	0.429841	0.439758	0.372094	0.479746	0.521238	0.426957	0.407817	0.367498	0.554406	0.620192	0.508075	0.274812	0.298866	0.482211	0.329507	0.472085	0.52982	0.428546	0.343124	0.244486	0.339811	0.30056	0.437387	0.221854	0.363524	0.480346	0.416926	0.361726	0.277029	0.339633
	39.5303	0.221106	0.268814	0.328838	0.475928	0.170339	0.339272	0.393078	0.30356	0.491058	0.0833281	0.195061	0.0279058	0.425548	0.163978	0.247977	0.106567	0.119301	0.265019	0.426241	0.430453	0.363223	0.48069	0.516133	0.424466	0.405875	0.364252	0.551679	0.61431	0.505084	0.273734	0.291621	0.472704	0.32478	0.472018	0.529395	0.422153	0.34184	0.238827	0.336647	0.298939	0.432355	0.213422	0.355884	0.478632	0.411041	0.366854	0.277606	0.338447
	39.9217	0.207124	0.262199	0.318566	0.470037	0.161218	0.338546	0.392124	0.306067	0.485229	0.088598	0.189026	0.0215878	0.423791	0.157927	0.24468	0.116895	0.125369	0.262939	0.422194	0.420526	0.354348	0.481336	0.511246	0.42184	0.403828	0.360481	0.548748	0.607822	0.501813	0.272574	0.28428	0.462959	0.319925	0.471776	0.528328	0.415598	0.340559	0.232788	0.33358	0.297175	0.427678	0.204998	0.348102	0.476896	0.404766	0.37165	0.278178	0.336874
	40.3131	0.193206	0.256106	0.307976	0.464037	0.152138	0.337581	0.390732	0.308191	0.479168	0.0953189	0.182879	0.0269665	0.422192	0.152213	0.241488	0.127	0.131297	0.26122	0.41776	0.410027	0.34551	0.481669	0.506637	0.419084	0.401714	0.356218	0.545629	0.60076	0.498291	0.271362	0.276929	0.453073	0.314967	0.471361	0.526631	0.40892	0.339286	0.226382	0.330615	0.295262	0.423411	0.196611	0.340237	0.475191	0.398144	0.376129	0.278747	0.33494
	40.7045	0.17942	0.25062	0.297124	0.457962	0.143103	0.336405	0.388926	0.309942	0.472941	0.103211	0.176697	0.0385395	0.420803	0.146864	0.23838	0.13685	0.137086	0.25989	0.412982	0.398999	0.336735	0.481667	0.502351	0.416193	0.399564	0.351484	0.542331	0.593151	0.494529	0.270119	0.26965	0.443145	0.309931	0.470769	0.524313	0.402146	0.338004	0.21962	0.327748	0.293166	0.419585	0.188376	0.332347	0.473563	0.391212	0.380286	0.279324	0.332665
	41.0959	0.165818	0.245797	0.286049	0.451839	0.134145	0.335028	0.386691	0.311297	0.466616	0.111989	0.170553	0.0514848	0.419656	0.141879	0.23533	0.146405	0.142654	0.258949	0.407921	0.387475	0.328043	0.481314	0.498428	0.413163	0.397404	0.346285	0.538867	0.585018	0.490537	0.268839	0.262517	0.433263	0.30481	0.469991	0.521373	0.395298	0.336705	0.212503	0.324994	0.290896	0.4162	0.180278	0.324487	0.472009	0.383984	0.384094	0.279884	0.330061
	41.4873	0.152442	0.241657	0.274806	0.445685	0.125287	0.333455	0.38405	0.312215	0.460259	0.121405	0.164505	0.064222	0.418784	0.137273	0.232321	0.155637	0.147968	0.258408	0.402636	0.375498	0.319469	0.480606	0.494911	0.409987	0.395255	0.340666	0.535243	0.576394	0.48633	0.267537	0.255601	0.423544	0.299627	0.469016	0.517818	0.388393	0.335384	0.205046	0.322356	0.288426	0.413305	0.172441	0.316712	0.470553	0.376512	0.387518	0.280426	0.327161
	41.8787	0.139318	0.238184	0.263422	0.439503	0.116515	0.331655	0.380966	0.312632	0.453931	0.131255	0.158592	0.0761928	0.418193	0.132996	0.229333	0.164527	0.153079	0.258234	0.397177	0.363085	0.311016	0.479528	0.491815	0.406649	0.393128	0.334618	0.53146	0.567295	0.481897	0.266176	0.24896	0.414068	0.294355	0.467828	0.513644	0.381428	0.334024	0.197243	0.319846	0.285764	0.410856	0.164864	0.309065	0.469151	0.368798	0.390499	0.280918	0.323966
	42.2701	0.126483	0.235331	0.251955	0.433296	0.107857	0.329603	0.37744	0.312485	0.44769	0.141362	0.152834	0.0871272	0.41789	0.129046	0.226353	0.173047	0.157941	0.258412	0.391619	0.350269	0.302716	0.478087	0.489168	0.403143	0.391033	0.328186	0.527518	0.557752	0.477249	0.264751	0.242649	0.404954	0.288994	0.466412	0.508859	0.374406	0.332626	0.189106	0.317467	0.282903	0.408887	0.157625	0.30159	0.467794	0.360888	0.392988	0.281346	0.32051
	42.6615	0.113987	0.233021	0.240455	0.427057	0.0992733	0.327256	0.373453	0.311714	0.441585	0.151602	0.147236	0.096923	0.417865	0.125376	0.223374	0.181194	0.162675	0.258898	0.386013	0.337067	0.29457	0.476275	0.486969	0.39945	0.388968	0.321376	0.523406	0.547784	0.472371	0.263226	0.236712	0.396284	0.283529	0.464754	0.503465	0.367313	0.331169	0.180635	0.315217	0.27984	0.407344	0.150779	0.294324	0.466436	0.352798	0.39493	0.281694	0.316797
	43.0528	0.101915	0.231166	0.228996	0.420787	0.0907866	0.324581	0.368984	0.310276	0.435661	0.161858	0.141794	0.105508	0.418104	0.121971	0.220393	0.188947	0.167259	0.259656	0.380437	0.323505	0.286599	0.474103	0.485225	0.395568	0.386927	0.314214	0.519117	0.537419	0.467268	0.261578	0.231186	0.388156	0.277944	0.462844	0.497476	0.36014	0.329656	0.171835	0.313094	0.276589	0.406216	0.144336	0.287301	0.465042	0.344554	0.396292	0.281943	0.312851
	43.4442	0.0904101	0.22967	0.217681	0.414486	0.0823773	0.32156	0.364052	0.308159	0.429958	0.172057	0.136506	0.112893	0.418593	0.11883	0.217413	0.196305	0.171755	0.260652	0.374958	0.309617	0.278811	0.471578	0.483927	0.391493	0.384898	0.306735	0.51464	0.526686	0.46194	0.2598	0.226107	0.38066	0.27225	0.460675	0.490911	0.352875	0.328075	0.162723	0.31108	0.27314	0.405473	0.138395	0.280556	0.463595	0.336195	0.397061	0.282102	0.308698
	43.8356	0.07969	0.228445	0.206614	0.408166	0.0740689	0.318182	0.358637	0.305369	0.424515	0.182116	0.131379	0.119084	0.419311	0.115934	0.214438	0.203257	0.176181	0.261841	0.369655	0.295436	0.271212	0.46871	0.483062	0.387225	0.382867	0.298947	0.50997	0.51561	0.45639	0.257872	0.221497	0.373865	0.266438	0.458249	0.483789	0.345504	0.326423	0.153304	0.309164	0.269517	0.40505	0.13292	0.274118	0.46205	0.327732	0.397234	0.282154	0.304354
	44.227	0.0700841	0.227416	0.195944	0.401845	0.0659134	0.314469	0.352781	0.301937	0.419369	0.191972	0.12643	0.124108	0.420248	0.113318	0.211478	0.209796	0.180479	0.26321	0.364611	0.281016	0.26382	0.465522	0.482617	0.382778	0.380817	0.290907	0.505105	0.504233	0.450641	0.255814	0.21738	0.367857	0.260541	0.455572	0.476143	0.338023	0.324704	0.14361	0.307322	0.265714	0.404947	0.128001	0.268024	0.460418	0.319216	0.396839	0.282115	0.299867
	44.6184	0.0620498	0.226521	0.185812	0.395546	0.0579746	0.310438	0.34649	0.297905	0.414556	0.201556	0.121695	0.127997	0.421385	0.110962	0.208542	0.215924	0.184687	0.26472	0.359901	0.266401	0.256631	0.462027	0.482561	0.37816	0.378726	0.282623	0.500046	0.492583	0.4447	0.25362	0.213761	0.362675	0.254566	0.452654	0.467997	0.330423	0.32291	0.133662	0.305538	0.261756	0.405075	0.123594	0.262302	0.458663	0.310656	0.395898	0.281979	0.295255
	45.0098	0.0561722	0.225716	0.176383	0.389304	0.0504281	0.306136	0.339798	0.293313	0.410113	0.210788	0.117219	0.130753	0.422714	0.10889	0.205641	0.221626	0.188686	0.266366	0.355619	0.251658	0.249666	0.458258	0.482878	0.373391	0.376576	0.274146	0.494807	0.480703	0.438607	0.251316	0.210642	0.358378	0.248543	0.449508	0.459382	0.322707	0.321056	0.123501	0.303798	0.257651	0.405436	0.119719	0.256985	0.456792	0.302092	0.394446	0.281746	0.290576
	45.4012	0.0530364	0.224965	0.16782	0.383145	0.0434833	0.301596	0.332735	0.288195	0.406071	0.219602	0.113057	0.132403	0.424218	0.107083	0.202783	0.226909	0.192499	0.26812	0.351828	0.236839	0.242922	0.454238	0.483523	0.368483	0.374343	0.265501	0.489398	0.468629	0.432377	0.248909	0.208007	0.354979	0.242497	0.446147	0.450324	0.314869	0.319135	0.113177	0.302086	0.253415	0.405959	0.116356	0.2521	0.45478	0.293544	0.392501	0.281413	0.28586
	45.7926	0.052979	0.224238	0.160272	0.377099	0.0375626	0.296849	0.325305	0.282563	0.40246	0.227907	0.109263	0.132937	0.425881	0.105514	0.199979	0.231763	0.196073	0.269967	0.34861	0.222001	0.236409	0.450004	0.484466	0.363453	0.372006	0.256715	0.48384	0.456396	0.426048	0.246399	0.205826	0.352489	0.236432	0.44258	0.440841	0.30691	0.317165	0.102752	0.300402	0.249078	0.406613	0.113434	0.247671	0.452601	0.285026	0.390073	0.280955	0.281152
	46.184	0.0558558	0.223496	0.1539	0.371189	0.0332209	0.291919	0.317545	0.276411	0.399299	0.235637	0.105887	0.132384	0.427687	0.10416	0.197237	0.236194	0.199395	0.271889	0.346018	0.207199	0.230131	0.445588	0.485662	0.35831	0.369542	0.247833	0.478149	0.444045	0.419645	0.243795	0.204058	0.350895	0.230372	0.438818	0.430959	0.298826	0.315145	0.0923262	0.29874	0.244646	0.407367	0.110952	0.243716	0.450234	0.276571	0.387157	0.280367	0.276497
	46.5753	0.061124	0.222689	0.148828	0.365431	0.0311788	0.286805	0.309434	0.269711	0.3966	0.242715	0.102965	0.130774	0.429601	0.102945	0.194567	0.240202	0.202535	0.273847	0.3441	0.192471	0.224085	0.441027	0.487061	0.353059	0.366928	0.238861	0.472341	0.431604	0.413191	0.241067	0.202642	0.350154	0.224299	0.434864	0.420687	0.29061	0.313084	0.0820297	0.297107	0.240162	0.40815	0.108781	0.240242	0.447612	0.268172	0.383728	0.279612	0.271919
	46.9667	0.068126	0.221753	0.145179	0.359835	0.0318826	0.281505	0.300994	0.262431	0.394359	0.249087	0.100518	0.128168	0.431597	0.10184	0.191983	0.243788	0.205466	0.275823	0.342891	0.177867	0.218282	0.436365	0.488615	0.347708	0.364139	0.229847	0.466433	0.419112	0.40672	0.238212	0.201511	0.350226	0.218223	0.430722	0.410045	0.282259	0.310995	0.0720841	0.295505	0.235635	0.408957	0.106911	0.237253	0.44471	0.259862	0.379763	0.278679	0.267464
	47.3581	0.076303	0.220606	0.14304	0.354405	0.0351931	0.275994	0.292208	0.254535	0.39256	0.254714	0.0985498	0.124678	0.433631	0.100763	0.189497	0.246968	0.208315	0.277768	0.342399	0.163416	0.212709	0.431635	0.49026	0.342255	0.361152	0.220793	0.460431	0.406592	0.400239	0.235188	0.200582	0.351023	0.212127	0.426394	0.399046	0.273759	0.308879	0.0628354	0.293936	0.231103	0.4097	0.105211	0.234742	0.441451	0.251638	0.375223	0.277545	0.263143
	47.7495	0.085249	0.219162	0.142453	0.349147	0.0404929	0.270258	0.283077	0.246001	0.391173	0.259563	0.0970465	0.120427	0.435664	0.0996762	0.187126	0.249739	0.211075	0.279657	0.342633	0.149162	0.207379	0.426888	0.491948	0.336707	0.357944	0.211737	0.454346	0.394083	0.393786	0.231977	0.199774	0.352478	0.206006	0.421885	0.38771	0.265111	0.306753	0.054845	0.292402	0.226588	0.410369	0.103639	0.232695	0.437801	0.243514	0.370092	0.276192	0.258993
	48.1409	0.0946775	0.217336	0.143428	0.344064	0.0471315	0.264279	0.273616	0.236826	0.390156	0.263631	0.0959809	0.115619	0.437653	0.0985345	0.184888	0.252121	0.213808	0.281452	0.343566	0.135147	0.202282	0.422159	0.493613	0.331067	0.354494	0.202697	0.44818	0.381613	0.387371	0.228558	0.198998	0.354482	0.199867	0.4172	0.37606	0.256307	0.304617	0.0489776	0.29089	0.222113	0.410896	0.102117	0.231094	0.433717	0.23551	0.364356	0.274626	0.25502
	48.5323	0.104387	0.215054	0.145897	0.339169	0.0546541	0.25805	0.26382	0.227032	0.389456	0.266906	0.0953178	0.110456	0.439561	0.097296	0.182802	0.254118	0.216539	0.283128	0.345177	0.121424	0.197426	0.417495	0.495206	0.325345	0.350782	0.193688	0.441942	0.369217	0.381033	0.224909	0.198173	0.356942	0.193706	0.412353	0.364119	0.247357	0.302491	0.0462864	0.289393	0.217712	0.411243	0.10056	0.229916	0.429167	0.22762	0.358023	0.272831	0.251245
	48.9237	0.114223	0.212269	0.149755	0.33448	0.062736	0.251589	0.253737	0.216668	0.389015	0.269402	0.0950166	0.105212	0.44136	0.0959579	0.180888	0.255742	0.219217	0.284675	0.347416	0.108069	0.192814	0.412941	0.496673	0.319558	0.346794	0.184748	0.435637	0.356934	0.3748	0.221039	0.197223	0.359756	0.187555	0.407361	0.351921	0.238275	0.300382	0.0475483	0.287884	0.213391	0.411386	0.0989585	0.229138	0.424162	0.219878	0.351122	0.270825	0.247684
	49.3151	0.124065	0.208959	0.154842	0.330024	0.0712097	0.244914	0.24338	0.205795	0.388771	0.271116	0.0950383	0.100172	0.443022	0.0944797	0.179164	0.257005	0.221878	0.286078	0.350235	0.0951651	0.188447	0.408535	0.497965	0.313722	0.342519	0.175878	0.429278	0.344801	0.368711	0.216938	0.196084	0.362814	0.181424	0.402246	0.339489	0.229086	0.298304	0.0526698	0.286344	0.209186	0.411265	0.0972141	0.228734	0.418689	0.212274	0.343685	0.268604	0.244338
	49.7065	0.133816	0.205134	0.160966	0.325836	0.079909	0.238077	0.232801	0.194493	0.388662	0.272052	0.0953478	0.0956598	0.444544	0.0928714	0.177647	0.257909	0.224423	0.287356	0.353577	0.082846	0.184343	0.404328	0.499051	0.307865	0.337953	0.167123	0.422883	0.332868	0.362817	0.21263	0.194705	0.366035	0.175349	0.397035	0.326858	0.219833	0.296277	0.0608239	0.284743	0.205098	0.410894	0.0953606	0.228685	0.412798	0.204833	0.335767	0.266175	0.241232
	50.0979	0.143403	0.200828	0.167937	0.321958	0.0887584	0.231119	0.222042	0.182833	0.388631	0.272208	0.095917	0.0920196	0.445916	0.0910974	0.176353	0.258471	0.226877	0.288511	0.357369	0.0712759	0.1805	0.400351	0.499886	0.302007	0.333095	0.158486	0.416473	0.321177	0.357158	0.20812	0.193044	0.36931	0.169355	0.391757	0.314052	0.210564	0.29431	0.0710873	0.283054	0.201152	0.410219	0.0933287	0.228971	0.406507	0.197557	0.32741	0.263543	0.238358
	50.4892	0.152777	0.196094	0.17555	0.318435	0.0976565	0.224102	0.211137	0.170882	0.388624	0.271569	0.0967265	0.0895718	0.447148	0.0891412	0.175294	0.258689	0.229203	0.289572	0.361552	0.0607127	0.176942	0.396654	0.500454	0.296178	0.327952	0.149998	0.410079	0.309785	0.3518	0.203421	0.191075	0.372577	0.163456	0.386443	0.301095	0.201349	0.292428	0.0827507	0.281255	0.19735	0.409264	0.0911543	0.229577	0.399871	0.190447	0.318658	0.260693	0.235734
	50.8806	0.161907	0.190991	0.18364	0.315311	0.106544	0.217074	0.200139	0.158694	0.388594	0.270135	0.0977628	0.0886182	0.448247	0.0869726	0.174484	0.258577	0.2314	0.290556	0.366043	0.0515297	0.17367	0.393266	0.500724	0.290399	0.322533	0.141678	0.403732	0.298742	0.346783	0.198545	0.188782	0.37575	0.157679	0.381119	0.288007	0.192258	0.290637	0.095354	0.279325	0.193697	0.408009	0.088836	0.230489	0.392934	0.183519	0.30954	0.25763	0.233352
	51.272	0.170785	0.185575	0.192053	0.312626	0.115372	0.210079	0.189062	0.1463	0.388499	0.267892	0.0990185	0.089328	0.449222	0.0845357	0.173933	0.258137	0.233544	0.291479	0.370777	0.0442831	0.170704	0.390222	0.500684	0.284693	0.316856	0.133535	0.397468	0.288104	0.342166	0.193477	0.186156	0.378775	0.152013	0.375811	0.274799	0.183384	0.288963	0.108607	0.277254	0.1902	0.406457	0.0863868	0.231696	0.385729	0.176755	0.30007	0.25433	0.231211
	51.6634	0.179413	0.179893	0.200672	0.310412	0.124082	0.203158	0.177955	0.133729	0.388299	0.264851	0.100486	0.0917677	0.450084	0.0818059	0.173654	0.257379	0.235618	0.292365	0.375669	0.0396816	0.168056	0.387549	0.500319	0.279078	0.310937	0.125605	0.391319	0.277932	0.337993	0.188223	0.183197	0.381599	0.146471	0.370542	0.261489	0.174823	0.287413	0.122311	0.275031	0.186846	0.404633	0.0838834	0.233186	0.378314	0.170176	0.290257	0.250793	0.229302
	52.0548	0.187803	0.173981	0.20941	0.308694	0.13267	0.196328	0.166831	0.121001	0.387958	0.261025	0.102156	0.0958225	0.450833	0.0787136	0.173659	0.256315	0.237736	0.293212	0.380645	0.0383008	0.165732	0.385266	0.499614	0.273566	0.304797	0.117885	0.385319	0.268281	0.3343	0.182752	0.179906	0.384168	0.141038	0.365329	0.248084	0.166686	0.286002	0.136343	0.272654	0.183642	0.402514	0.0813294	0.234946	0.370708	0.163766	0.280092	0.247005	0.2276
	52.4462	0.195962	0.167867	0.218187	0.307484	0.141089	0.189621	0.155731	0.108149	0.387438	0.256449	0.104012	0.101283	0.451473	0.0752405	0.173962	0.254947	0.239892	0.294037	0.385628	0.0401229	0.163751	0.383394	0.498567	0.268175	0.298462	0.110423	0.379495	0.25922	0.331128	0.177058	0.176296	0.386459	0.135709	0.36019	0.234599	0.159098	0.284742	0.150604	0.270121	0.180561	0.400149	0.0788582	0.236962	0.362973	0.157537	0.269579	0.242963	0.226094
	52.8376	0.203888	0.16158	0.226957	0.306787	0.149349	0.18305	0.144709	0.0952298	0.386702	0.251181	0.106032	0.107853	0.451996	0.0713455	0.174574	0.253295	0.242126	0.29483	0.390535	0.0444417	0.162109	0.381932	0.497161	0.262912	0.291955	0.103227	0.373871	0.250804	0.32849	0.171118	0.172382	0.388427	0.130489	0.355137	0.221047	0.152186	0.283634	0.165023	0.267428	0.177603	0.397513	0.0765059	0.239213	0.35514	0.151496	0.258714	0.23868	0.224742
	53.229	0.211569	0.155165	0.235665	0.306598	0.157422	0.176642	0.133816	0.0823341	0.385713	0.245282	0.108186	0.11522	0.452399	0.0670169	0.175508	0.25136	0.244452	0.295602	0.3953	0.0503643	0.160825	0.380889	0.495404	0.257797	0.285305	0.0963504	0.36847	0.243105	0.326415	0.164919	0.168191	0.390063	0.125369	0.350188	0.207446	0.146095	0.282694	0.179541	0.264574	0.174739	0.394648	0.0744262	0.241678	0.347274	0.145642	0.247517	0.234154	0.223523
	53.6204	0.21897	0.148686	0.244268	0.306907	0.165298	0.170432	0.12317	0.0696166	0.384433	0.238846	0.110438	0.123097	0.452674	0.0622644	0.176771	0.249159	0.246801	0.296354	0.399841	0.0571641	0.159892	0.380252	0.493288	0.252841	0.278543	0.0898415	0.363307	0.236184	0.3249	0.158469	0.163762	0.39134	0.120377	0.345358	0.193822	0.140962	0.281915	0.194098	0.261545	0.17195	0.391561	0.0727205	0.24433	0.339448	0.140004	0.236018	0.229416	0.222396
	54.0117	0.22605	0.142243	0.252723	0.307701	0.172964	0.164461	0.112879	0.0573221	0.382827	0.231959	0.112754	0.131212	0.452818	0.0570836	0.178367	0.246697	0.249195	0.29709	0.404105	0.0643778	0.159318	0.38001	0.490825	0.248067	0.271699	0.083764	0.358399	0.230104	0.323956	0.151759	0.159145	0.392255	0.115517	0.340667	0.180195	0.136927	0.281309	0.208652	0.258336	0.169214	0.388267	0.0715236	0.247141	0.331735	0.13458	0.224261	0.224475	0.221328
	54.4031	0.232756	0.135975	0.260976	0.308962	0.180371	0.158796	0.103128	0.0458833	0.380866	0.22473	0.115102	0.139365	0.452834	0.0515199	0.180294	0.243983	0.251532	0.297834	0.408025	0.0717059	0.1591	0.380145	0.488026	0.243499	0.264812	0.0782227	0.353761	0.224929	0.323576	0.144822	0.154411	0.392811	0.110816	0.336135	0.166599	0.134099	0.28087	0.223144	0.254925	0.166492	0.38482	0.0709872	0.25008	0.32425	0.129405	0.212309	0.219356	0.220292
	54.7945	0.23904	0.130056	0.268993	0.310671	0.187508	0.153498	0.0941291	0.0361092	0.378528	0.217262	0.117461	0.147366	0.452726	0.0455783	0.182545	0.241028	0.253823	0.298592	0.411556	0.0789736	0.159231	0.380625	0.484905	0.239158	0.257918	0.0733132	0.349409	0.220704	0.32375	0.137665	0.149646	0.393008	0.106292	0.331784	0.15306	0.132559	0.280602	0.237535	0.2513	0.163769	0.381222	0.0711845	0.253116	0.317077	0.124493	0.200223	0.214078	0.219249
	55.1859	0.244859	0.124695	0.276719	0.312813	0.194308	0.148651	0.0861367	0.0295375	0.375803	0.209665	0.11982	0.15509	0.452509	0.0393062	0.185105	0.23783	0.256037	0.2994	0.41466	0.0860671	0.159713	0.381425	0.481493	0.235076	0.251059	0.0691961	0.345362	0.217479	0.324471	0.130321	0.144954	0.392877	0.101948	0.327638	0.139616	0.132339	0.280503	0.251774	0.247448	0.160998	0.377553	0.0722488	0.256219	0.310347	0.119864	0.188075	0.208649	0.218187
	55.5773	0.250184	0.120118	0.284131	0.315364	0.200749	0.144329	0.0794717	0.0281806	0.372691	0.202056	0.122183	0.162412	0.452194	0.032728	0.187954	0.234405	0.258161	0.30027	0.417296	0.0929173	0.160524	0.382504	0.477808	0.231272	0.244276	0.0660062	0.341636	0.215277	0.325709	0.12281	0.140454	0.392429	0.0977974	0.323716	0.126305	0.133418	0.280566	0.265817	0.243357	0.15816	0.373831	0.0741601	0.259357	0.30415	0.115556	0.175923	0.20309	0.217072
	55.9687	0.255004	0.116559	0.2912	0.318306	0.206779	0.14061	0.0744358	0.0323584	0.369202	0.19455	0.124566	0.169231	0.451797	0.0258897	0.191069	0.230749	0.260264	0.301229	0.419449	0.0994907	0.161663	0.383828	0.473893	0.227775	0.237613	0.0639186	0.338253	0.214113	0.327453	0.115141	0.136278	0.391711	0.0938167	0.320035	0.113173	0.135726	0.280796	0.279627	0.239028	0.155217	0.370129	0.0769642	0.262502	0.298592	0.111578	0.163826	0.197396	0.2159
	56.3601	0.259323	0.114231	0.29791	0.321606	0.212364	0.137558	0.0713314	0.0400803	0.365356	0.187286	0.126993	0.175455	0.45133	0.0189074	0.194423	0.226875	0.262316	0.30229	0.421088	0.105764	0.163103	0.385349	0.469772	0.224599	0.231113	0.063055	0.335226	0.213979	0.329661	0.107336	0.132563	0.390754	0.090001	0.316609	0.100289	0.139145	0.281176	0.293159	0.234462	0.15214	0.366499	0.0805666	0.265624	0.293758	0.107981	0.15183	0.191588	0.21465
	56.7515	0.26316	0.113309	0.304264	0.325234	0.217495	0.13522	0.070334	0.0494643	0.361183	0.180398	0.129494	0.180972	0.450797	0.0121176	0.197986	0.222788	0.264404	0.303457	0.422207	0.111745	0.16483	0.387026	0.465485	0.221759	0.224815	0.0635024	0.332574	0.21485	0.332306	0.0993837	0.129446	0.389607	0.0863176	0.313442	0.0877444	0.143537	0.281709	0.306384	0.229679	0.148908	0.362987	0.0849127	0.268692	0.289701	0.104784	0.139973	0.18567	0.213314
	57.1429	0.266531	0.113903	0.310254	0.329145	0.222138	0.133633	0.0714444	0.0595173	0.356717	0.174045	0.132101	0.185694	0.450201	0.00736717	0.201728	0.218494	0.266501	0.304735	0.422786	0.117437	0.166821	0.388813	0.461064	0.219263	0.218759	0.0652725	0.330303	0.216684	0.33534	0.091296	0.127057	0.388321	0.0827431	0.310536	0.0756987	0.148741	0.282379	0.31926	0.224695	0.145486	0.359674	0.0898959	0.271675	0.286479	0.102031	0.1283	0.179659	0.211886
	57.5342	0.269458	0.116041	0.315894	0.33329	0.226315	0.132798	0.0745101	0.0697649	0.351991	0.168383	0.134838	0.189502	0.449527	0.00973065	0.205614	0.214009	0.268611	0.306101	0.422818	0.122864	0.169043	0.390659	0.456536	0.217111	0.212976	0.0682945	0.328417	0.219417	0.338713	0.0830625	0.125503	0.386936	0.079262	0.307884	0.0644052	0.154599	0.283177	0.331758	0.219538	0.141866	0.356579	0.0953902	0.274537	0.284089	0.0997687	0.116857	0.173586	0.21035
	57.9256	0.271948	0.119672	0.32118	0.337611	0.230007	0.132709	0.0792208	0.0799627	0.347044	0.163575	0.137723	0.192311	0.448762	0.0168242	0.209609	0.209336	0.270727	0.307549	0.422297	0.128042	0.171478	0.392522	0.451938	0.215305	0.207496	0.0724666	0.326914	0.222982	0.342377	0.0746916	0.124866	0.385515	0.0758465	0.305477	0.054312	0.160953	0.284093	0.343844	0.214236	0.138016	0.353786	0.101321	0.27724	0.282547	0.0980239	0.105719	0.167473	0.208712
	58.317	0.273996	0.124671	0.326118	0.342043	0.233237	0.133327	0.0852537	0.089958	0.341911	0.159773	0.140761	0.194031	0.447879	0.025133	0.213674	0.204495	0.272756	0.309046	0.421213	0.132993	0.174083	0.394347	0.447288	0.213834	0.20234	0.0776263	0.325778	0.227288	0.346262	0.0662035	0.125187	0.384091	0.0725026	0.303301	0.0461705	0.167657	0.285107	0.355483	0.208816	0.133936	0.35131	0.107533	0.279739	0.281812	0.0968529	0.09498	0.161372	0.206954
	58.7084	0.275584	0.130863	0.3307	0.346523	0.236005	0.134607	0.0922869	0.0996447	0.336627	0.157095	0.143948	0.194598	0.446854	0.0339293	0.217769	0.199492	0.274702	0.310574	0.419575	0.137738	0.176838	0.396094	0.442623	0.212695	0.197525	0.0836464	0.324993	0.232254	0.35032	0.0576226	0.12647	0.382722	0.0692131	0.301342	0.0411013	0.174579	0.286214	0.366646	0.203307	0.129605	0.349208	0.113979	0.281991	0.281852	0.0962691	0.0847874	0.155315	0.205087
	59.0998	0.276682	0.138044	0.334911	0.350983	0.238307	0.136484	0.100034	0.108933	0.331228	0.155636	0.147271	0.193983	0.445661	0.0429702	0.221848	0.194344	0.276462	0.312112	0.417379	0.142286	0.179702	0.397713	0.437958	0.211876	0.193059	0.0903696	0.324534	0.23778	0.354476	0.0490242	0.128673	0.381442	0.0659846	0.299586	0.0402114	0.181595	0.28739	0.377292	0.19773	0.125018	0.347512	0.120518	0.283948	0.282611	0.0963027	0.0753401	0.149357	0.203105
	59.4912	0.277259	0.146008	0.338746	0.355366	0.240155	0.13889	0.10828	0.117751	0.325752	0.155426	0.150713	0.192164	0.444273	0.0521642	0.225864	0.189061	0.278033	0.313635	0.414647	0.146656	0.18265	0.399163	0.433324	0.211369	0.188947	0.0976911	0.324372	0.24378	0.35868	0.0404996	0.13172	0.380295	0.0628123	0.298018	0.0436742	0.188601	0.28863	0.387394	0.19211	0.120175	0.346239	0.127102	0.285562	0.28402	0.0969569	0.0669082	0.143542	0.201018
	59.8826	0.277285	0.154561	0.342177	0.359619	0.241517	0.14176	0.116817	0.126047	0.32024	0.156455	0.154255	0.189169	0.442676	0.0614159	0.229769	0.183655	0.279392	0.31514	0.411392	0.15085	0.185652	0.400404	0.428742	0.211163	0.185187	0.105499	0.324477	0.250163	0.362872	0.0322498	0.135506	0.379319	0.0596798	0.296628	0.0505244	0.195501	0.289915	0.396918	0.186465	0.115064	0.345439	0.133643	0.286789	0.286025	0.0982129	0.059845	0.13791	0.198846
	60.274	0.276741	0.163537	0.345203	0.363698	0.242405	0.145023	0.125508	0.133786	0.314738	0.158648	0.157883	0.185016	0.440851	0.0706774	0.233515	0.178144	0.280517	0.316605	0.407642	0.154881	0.188674	0.401396	0.424233	0.211247	0.181769	0.113707	0.324819	0.256842	0.367003	0.0246665	0.139906	0.37854	0.0565822	0.295405	0.0595241	0.202218	0.291237	0.405834	0.18082	0.109699	0.345097	0.140067	0.287588	0.288536	0.100061	0.0545541	0.132513	0.196599
	60.6654	0.275625	0.172799	0.347808	0.367571	0.242785	0.148628	0.134224	0.140958	0.309298	0.161895	0.161589	0.179757	0.438794	0.0799042	0.237051	0.172533	0.281471	0.318037	0.403434	0.158758	0.191701	0.40211	0.419825	0.211612	0.17868	0.122251	0.325369	0.263746	0.371032	0.0186677	0.144794	0.377998	0.0534801	0.294337	0.0697793	0.208687	0.292587	0.414119	0.175198	0.104072	0.345261	0.146348	0.287924	0.291504	0.102449	0.0514257	0.12738	0.194318
	61.0568	0.27395	0.18224	0.349995	0.371211	0.242663	0.152518	0.142867	0.147576	0.303976	0.166048	0.165372	0.173433	0.436495	0.0890553	0.240334	0.166845	0.282217	0.31942	0.398798	0.16249	0.194696	0.40251	0.415529	0.212239	0.175902	0.131056	0.326098	0.270794	0.374914	0.0161766	0.150038	0.377704	0.0503565	0.293415	0.0807446	0.214854	0.293952	0.421746	0.169626	0.0982018	0.345909	0.152395	0.287768	0.294839	0.105347	0.0506629	0.122563	0.192024
	61.4481	0.271748	0.191782	0.351773	0.374599	0.242035	0.156658	0.15138	0.153671	0.298833	0.170934	0.169241	0.16608	0.433952	0.0981233	0.243321	0.161088	0.282824	0.32075	0.393785	0.166097	0.197647	0.402577	0.411372	0.213115	0.173412	0.140085	0.326986	0.277928	0.378628	0.0186287	0.155516	0.377688	0.0471738	0.292625	0.0921127	0.220684	0.295333	0.428703	0.16414	0.092095	0.347053	0.158219	0.287099	0.298478	0.108701	0.0521774	0.118103	0.189768
	61.8395	0.269058	0.201357	0.353143	0.377715	0.2409	0.161008	0.159698	0.159286	0.293927	0.176381	0.173206	0.157739	0.431159	0.107068	0.24597	0.155284	0.283259	0.322016	0.38843	0.169589	0.200524	0.402285	0.407359	0.214216	0.171185	0.149275	0.328008	0.285083	0.382134	0.0245543	0.161115	0.377954	0.0439062	0.291952	0.103694	0.226145	0.296715	0.434969	0.158774	0.0857676	0.348684	0.163743	0.285903	0.302346	0.112458	0.0555909	0.114051	0.187584
	62.2309	0.265926	0.210905	0.35413	0.380544	0.239297	0.165535	0.16781	0.16447	0.289318	0.182201	0.177284	0.148426	0.428103	0.115889	0.248247	0.149453	0.283513	0.323194	0.382785	0.172992	0.20331	0.401618	0.4035	0.215518	0.16919	0.158598	0.329143	0.292207	0.385417	0.0320614	0.166731	0.378509	0.040544	0.291376	0.115376	0.231222	0.298101	0.440536	0.153574	0.0792497	0.350765	0.168971	0.284168	0.306358	0.116583	0.0604152	0.110472	0.185519
	62.6223	0.262392	0.220362	0.354734	0.383064	0.23723	0.170205	0.175684	0.169269	0.285056	0.188233	0.181484	0.138188	0.424776	0.124547	0.250115	0.143614	0.283575	0.324269	0.376891	0.176319	0.205985	0.400565	0.399799	0.216992	0.167397	0.168006	0.330371	0.299249	0.388445	0.0402433	0.172272	0.379353	0.0370707	0.290878	0.127081	0.2359	0.299479	0.445394	0.148576	0.0725586	0.353293	0.173871	0.28189	0.310451	0.121011	0.0661854	0.107416	0.18362
	63.0137	0.258487	0.229651	0.35497	0.385253	0.234757	0.174974	0.183319	0.173719	0.281184	0.194312	0.185811	0.12706	0.421157	0.13302	0.251545	0.137796	0.283357	0.325206	0.370791	0.179589	0.208525	0.39911	0.39625	0.218603	0.165772	0.177463	0.331666	0.306159	0.391196	0.0487493	0.177651	0.380464	0.0335113	0.290431	0.138749	0.24017	0.300849	0.449531	0.143822	0.0657454	0.356194	0.178408	0.279066	0.314525	0.125713	0.0725332	0.104955	0.181923
	63.4051	0.254232	0.238689	0.354837	0.387085	0.231896	0.179805	0.19071	0.177848	0.277734	0.200309	0.190263	0.115123	0.417232	0.141274	0.252506	0.132019	0.282868	0.325984	0.364537	0.182811	0.210918	0.397253	0.392851	0.220323	0.164284	0.186938	0.333005	0.312897	0.393648	0.057411	0.182791	0.381835	0.0298829	0.290014	0.15034	0.244026	0.302205	0.452946	0.139347	0.0588464	0.359455	0.182602	0.275696	0.318526	0.13063	0.0791833	0.103132	0.180479
	63.7965	0.24963	0.247382	0.354329	0.388534	0.228693	0.184642	0.197836	0.181668	0.274726	0.206103	0.194823	0.102501	0.412984	0.14926	0.252968	0.126318	0.28202	0.326573	0.358165	0.185989	0.213136	0.394985	0.389582	0.222114	0.162898	0.196381	0.334359	0.319417	0.395769	0.0661345	0.187616	0.383422	0.0262411	0.289603	0.161812	0.247462	0.303541	0.455628	0.135176	0.0519339	0.362994	0.186392	0.271782	0.322369	0.13572	0.0859273	0.101986	0.179315
	64.1879	0.244681	0.25564	0.353444	0.389579	0.225181	0.189441	0.204702	0.185189	0.272166	0.2116	0.199468	0.089388	0.4084	0.156959	0.252905	0.120716	0.280825	0.326953	0.351732	0.189125	0.215172	0.392313	0.386438	0.223948	0.161583	0.205771	0.335699	0.325684	0.397545	0.0748651	0.192059	0.385202	0.0226708	0.289178	0.173138	0.250476	0.304859	0.457579	0.131329	0.0450982	0.366766	0.189821	0.267334	0.326006	0.140945	0.0926163	0.101535	0.178475
	64.5793	0.239379	0.263381	0.352162	0.390203	0.221374	0.19415	0.211272	0.188415	0.270047	0.216734	0.204164	0.0761245	0.403477	0.164317	0.252292	0.115246	0.279274	0.327113	0.34528	0.192201	0.217006	0.389236	0.383397	0.225795	0.160311	0.215053	0.336994	0.331658	0.398947	0.0835359	0.196057	0.387127	0.0193028	0.288724	0.184288	0.253062	0.306148	0.458794	0.127809	0.0384714	0.370712	0.192842	0.262362	0.329394	0.146247	0.0991291	0.101759	0.177983
	64.9706	0.233722	0.270546	0.350484	0.390399	0.217312	0.198728	0.217543	0.191358	0.268353	0.221444	0.20888	0.0632632	0.398216	0.171328	0.251107	0.109941	0.277362	0.32704	0.338865	0.195211	0.218628	0.385766	0.380448	0.227632	0.159055	0.224206	0.338216	0.337311	0.399966	0.0921108	0.199555	0.389153	0.0163979	0.288228	0.195243	0.255224	0.307414	0.459277	0.124614	0.0322897	0.374754	0.195482	0.256888	0.332498	0.151601	0.105386	0.102638	0.177868
	65.362	0.227718	0.277097	0.348398	0.39017	0.212987	0.203144	0.223486	0.194038	0.267058	0.225698	0.213583	0.0518589	0.392634	0.17797	0.249333	0.104829	0.275159	0.326746	0.332538	0.19813	0.220031	0.381915	0.377577	0.22944	0.157796	0.233186	0.339337	0.342615	0.400589	0.100534	0.202509	0.391238	0.0143709	0.287685	0.205986	0.256964	0.308649	0.459035	0.121727	0.0269271	0.37886	0.197748	0.25094	0.335323	0.156954	0.111324	0.104114	0.178154
	65.7534	0.221389	0.283021	0.34591	0.389528	0.208433	0.207373	0.229086	0.196485	0.26613	0.22946	0.218247	0.0437955	0.386749	0.184247	0.246956	0.0999516	0.272643	0.326224	0.32635	0.200943	0.221202	0.377697	0.374766	0.2312	0.156516	0.241959	0.340337	0.347544	0.40081	0.108772	0.204881	0.393327	0.0137936	0.28709	0.216504	0.258294	0.309857	0.458075	0.119124	0.0230394	0.382939	0.199635	0.244557	0.337853	0.162279	0.116913	0.106134	0.178847
	66.1448	0.21477	0.288325	0.343029	0.388496	0.203646	0.211412	0.234343	0.198746	0.265533	0.232712	0.222857	0.041713	0.380594	0.190175	0.243969	0.0953349	0.269891	0.325493	0.320357	0.203632	0.222144	0.373138	0.372011	0.232902	0.155204	0.250503	0.341201	0.352086	0.400638	0.116795	0.206651	0.395386	0.0150241	0.286443	0.22679	0.259231	0.311038	0.456417	0.116773	0.0214677	0.386972	0.201202	0.237792	0.340122	0.167543	0.122141	0.108635	0.179969
	66.5362	0.207907	0.293027	0.339765	0.387098	0.198652	0.215255	0.239239	0.200872	0.265225	0.235432	0.227407	0.0468143	0.374199	0.195765	0.240368	0.0910225	0.266884	0.324557	0.314598	0.20618	0.222845	0.368258	0.369293	0.234528	0.153853	0.258773	0.341915	0.35622	0.40007	0.124574	0.207804	0.39736	0.0178603	0.285745	0.236834	0.259794	0.31219	0.454075	0.114636	0.0226829	0.390885	0.202429	0.230705	0.342134	0.172712	0.12701	0.111554	0.18151
	66.9276	0.200856	0.29715	0.336143	0.385365	0.193473	0.218913	0.243802	0.202923	0.265166	0.237599	0.231904	0.0574435	0.367601	0.201058	0.236157	0.0870443	0.263628	0.323419	0.309126	0.208582	0.223311	0.363089	0.366613	0.23607	0.152462	0.266761	0.342477	0.359943	0.399128	0.132105	0.208339	0.399218	0.0218544	0.284992	0.246634	0.260012	0.31332	0.451074	0.112677	0.0262717	0.394646	0.203394	0.223372	0.343918	0.177774	0.131541	0.114845	0.183475
	67.319	0.193668	0.300706	0.33217	0.383321	0.188125	0.222391	0.248029	0.204951	0.265313	0.239201	0.23636	0.0712691	0.360838	0.206065	0.231341	0.0834381	0.260127	0.322085	0.303966	0.210823	0.223535	0.357662	0.363954	0.23751	0.15103	0.274425	0.342883	0.363242	0.397813	0.139371	0.20826	0.400918	0.026633	0.284184	0.256179	0.259911	0.314422	0.447436	0.110851	0.0313657	0.398217	0.204094	0.215875	0.345494	0.18269	0.135747	0.118444	0.185844
	67.7104	0.186393	0.303693	0.327873	0.380992	0.18266	0.225692	0.251946	0.207001	0.26562	0.240218	0.240792	0.0868139	0.353938	0.210824	0.225931	0.0802354	0.256319	0.320541	0.299152	0.212906	0.223515	0.352011	0.361313	0.238833	0.149564	0.281753	0.343137	0.366114	0.396143	0.146378	0.207575	0.402424	0.0319623	0.283314	0.265461	0.259524	0.315503	0.443187	0.109121	0.0372851	0.401538	0.204583	0.208308	0.346866	0.187453	0.139651	0.122314	0.188599
	68.1018	0.179067	0.306099	0.323255	0.378395	0.177091	0.228815	0.255571	0.209104	0.266042	0.240649	0.245216	0.103282	0.346941	0.215347	0.21994	0.0774599	0.252233	0.318789	0.294699	0.214821	0.223256	0.346178	0.35868	0.240022	0.148069	0.288717	0.343237	0.368556	0.394127	0.153117	0.206296	0.40371	0.0377159	0.282375	0.274469	0.258877	0.316555	0.438357	0.107446	0.0436223	0.404602	0.204901	0.200771	0.348059	0.19203	0.143259	0.126403	0.191713
	68.4931	0.171715	0.307893	0.318325	0.375544	0.17148	0.23174	0.25891	0.21127	0.266529	0.240491	0.249644	0.120217	0.339871	0.21965	0.213384	0.0751364	0.247806	0.31681	0.290615	0.216564	0.222749	0.340198	0.356045	0.241057	0.146553	0.295291	0.343185	0.370559	0.39177	0.159582	0.204434	0.404734	0.0437909	0.281358	0.283185	0.257993	0.317581	0.432967	0.105788	0.0501281	0.407339	0.205058	0.19337	0.349058	0.196403	0.146572	0.130662	0.195144
	68.8845	0.164349	0.309048	0.31309	0.37245	0.165846	0.234452	0.261986	0.213494	0.26703	0.239764	0.25408	0.137336	0.332765	0.223755	0.206282	0.0732673	0.243074	0.314602	0.286905	0.218126	0.222002	0.334119	0.353407	0.241926	0.145026	0.301464	0.34298	0.372127	0.389083	0.165767	0.202002	0.405482	0.0501334	0.280258	0.291598	0.256897	0.318574	0.427053	0.10411	0.0566711	0.409745	0.205129	0.186218	0.349888	0.200556	0.149584	0.135049	0.198861
	69.2759	0.15697	0.309536	0.307542	0.369121	0.160232	0.236915	0.264785	0.21575	0.26749	0.238493	0.25852	0.154401	0.325656	0.227656	0.198655	0.0718585	0.238045	0.312156	0.283553	0.21949	0.221009	0.327979	0.350753	0.24261	0.143495	0.307196	0.342614	0.373251	0.386061	0.171643	0.199008	0.405913	0.0566903	0.279068	0.29969	0.2556	0.319528	0.42064	0.102375	0.0631461	0.411768	0.205101	0.179428	0.350542	0.204454	0.152278	0.139506	0.202805
	69.6673	0.149578	0.309348	0.301695	0.365573	0.154668	0.239103	0.267321	0.218009	0.267854	0.23672	0.262951	0.17124	0.318582	0.231386	0.190529	0.070889	0.232738	0.30947	0.280554	0.220642	0.219777	0.321829	0.348087	0.243102	0.14197	0.312487	0.342085	0.373936	0.382719	0.177198	0.195466	0.406016	0.0634232	0.277787	0.307449	0.254121	0.320441	0.413761	0.100548	0.069495	0.413387	0.205049	0.173121	0.351038	0.208093	0.154649	0.143996	0.206936
	70.0587	0.142173	0.308496	0.29555	0.361821	0.149169	0.240983	0.269576	0.220234	0.268069	0.234499	0.267357	0.187672	0.31159	0.234944	0.181937	0.0703376	0.227235	0.306556	0.277879	0.221555	0.21831	0.315712	0.345405	0.243395	0.140461	0.317301	0.341382	0.37418	0.379056	0.182394	0.191391	0.405766	0.0703142	0.276417	0.314865	0.252466	0.3213	0.406451	0.0985876	0.0756698	0.414589	0.204974	0.167409	0.351402	0.211441	0.156688	0.148469	0.211196
	70.4501	0.134763	0.307013	0.289127	0.357889	0.143773	0.242537	0.271549	0.222391	0.268082	0.231882	0.271721	0.203558	0.304724	0.238365	0.172915	0.0701649	0.221534	0.303415	0.275509	0.222213	0.216611	0.309675	0.342714	0.243488	0.138977	0.321632	0.340503	0.373987	0.375084	0.187215	0.186803	0.405146	0.0773335	0.274964	0.321931	0.250647	0.322104	0.398742	0.096462	0.0816292	0.415337	0.204918	0.162403	0.351649	0.214491	0.158408	0.152891	0.215537
	70.8415	0.127365	0.304958	0.28245	0.353805	0.138478	0.243754	0.273243	0.224456	0.267849	0.228939	0.276029	0.21877	0.298041	0.24167	0.163509	0.0703251	0.215725	0.300072	0.273411	0.222592	0.214694	0.303769	0.340022	0.243386	0.137526	0.325466	0.339444	0.373369	0.370818	0.191634	0.181729	0.404156	0.0844822	0.273439	0.328644	0.248673	0.322841	0.390677	0.0941325	0.0873562	0.415653	0.204917	0.158199	0.351829	0.217229	0.15983	0.157232	0.219912
	71.2329	0.12001	0.302401	0.275548	0.3496	0.133326	0.244631	0.274648	0.226412	0.267331	0.225723	0.280274	0.233201	0.291591	0.244887	0.153774	0.0707706	0.209802	0.29653	0.271552	0.222676	0.212559	0.298034	0.337337	0.243093	0.136117	0.328788	0.338206	0.372332	0.36627	0.195634	0.176203	0.402781	0.0917418	0.27185	0.335	0.246554	0.323507	0.382291	0.0915706	0.0928166	0.415505	0.204971	0.154872	0.35196	0.219641	0.160992	0.16146	0.224271
	71.6243	0.112738	0.299423	0.268465	0.345309	0.128326	0.245185	0.275791	0.228259	0.266502	0.222296	0.284457	0.246782	0.285429	0.248059	0.143776	0.0714417	0.203796	0.292807	0.2699	0.222458	0.210225	0.292524	0.334682	0.242621	0.13476	0.331605	0.336795	0.370895	0.361466	0.199215	0.170265	0.401038	0.0991087	0.270209	0.341003	0.244304	0.324094	0.373631	0.0887497	0.0980061	0.414926	0.205143	0.152475	0.35209	0.221731	0.161946	0.165567	0.228582
	72.0157	0.105598	0.296098	0.261231	0.340963	0.123522	0.245426	0.276671	0.229998	0.265341	0.218706	0.288591	0.259442	0.279599	0.251197	0.133591	0.072292	0.197719	0.288907	0.268407	0.221927	0.207693	0.287276	0.332064	0.241972	0.133461	0.333899	0.33522	0.369068	0.356419	0.202367	0.163961	0.398925	0.106573	0.268524	0.346648	0.241932	0.324593	0.364734	0.0856511	0.102903	0.413913	0.205404	0.151021	0.352235	0.223479	0.162739	0.169527	0.232797
	72.407	0.0986465	0.292496	0.253896	0.336589	0.118954	0.245379	0.277318	0.231637	0.26384	0.214998	0.292693	0.271153	0.274142	0.254342	0.123316	0.0732625	0.191532	0.284824	0.26704	0.221094	0.204977	0.282335	0.32951	0.241158	0.132226	0.335686	0.333496	0.366874	0.351159	0.205108	0.157337	0.396468	0.114109	0.266801	0.351934	0.239454	0.325002	0.355642	0.082268	0.107501	0.412484	0.20581	0.150495	0.352416	0.224896	0.163425	0.173335	0.236896
	72.7984	0.0919413	0.288669	0.246488	0.332206	0.11467	0.245057	0.277748	0.233176	0.261998	0.211216	0.296784	0.28187	0.269087	0.25749	0.113067	0.0743116	0.185273	0.280561	0.265746	0.219956	0.202086	0.277736	0.327031	0.240181	0.131057	0.336958	0.331635	0.364327	0.345698	0.207439	0.150442	0.393682	0.121706	0.265042	0.356856	0.236874	0.325305	0.346398	0.0785966	0.111796	0.410675	0.206338	0.15084	0.352642	0.225967	0.164041	0.176973	0.240841
	73.1898	0.0855444	0.28466	0.239045	0.327824	0.110751	0.24447	0.277973	0.234611	0.259817	0.207392	0.300888	0.291564	0.26445	0.260654	0.102991	0.0753924	0.17889	0.276094	0.264484	0.218527	0.199022	0.273509	0.324645	0.239045	0.129957	0.337724	0.329655	0.361443	0.340055	0.209375	0.143322	0.390588	0.129322	0.263245	0.361403	0.234202	0.325501	0.337034	0.0746488	0.115773	0.408482	0.206998	0.151972	0.352893	0.226692	0.164614	0.180424	0.244607
	73.5812	0.0795204	0.280504	0.2316	0.323446	0.107251	0.243621	0.278017	0.235923	0.257307	0.203571	0.30502	0.300195	0.260239	0.263818	0.0932832	0.0764686	0.172431	0.271417	0.263204	0.216811	0.195803	0.269684	0.322369	0.237754	0.128922	0.337992	0.327566	0.358243	0.334243	0.210924	0.136018	0.387223	0.136934	0.261407	0.365569	0.231437	0.325574	0.327592	0.0704358	0.119443	0.405965	0.207794	0.153781	0.353168	0.227074	0.165158	0.183673	0.24817
	73.9726	0.0739419	0.276232	0.224178	0.319067	0.104275	0.242498	0.277868	0.237079	0.254474	0.199783	0.309189	0.307708	0.256445	0.266957	0.0842022	0.0775102	0.165898	0.26651	0.261856	0.214814	0.192425	0.266272	0.32021	0.236308	0.127946	0.337758	0.325377	0.354737	0.328265	0.212084	0.128567	0.383602	0.144502	0.259524	0.369338	0.228577	0.325518	0.318101	0.0659789	0.122792	0.403119	0.208683	0.156142	0.353425	0.227097	0.165671	0.186692	0.251499
	74.364	0.0688953	0.271881	0.216824	0.31468	0.101888	0.241094	0.27754	0.23804	0.251327	0.196072	0.313392	0.314057	0.253056	0.270052	0.0760976	0.0784859	0.159323	0.26136	0.260401	0.21254	0.188906	0.263291	0.318184	0.234715	0.12702	0.337047	0.323095	0.350943	0.322136	0.212861	0.121004	0.379768	0.151992	0.257594	0.372706	0.225615	0.325322	0.308598	0.0612982	0.125833	0.399998	0.209689	0.15892	0.353649	0.226777	0.166153	0.189467	0.254577
	74.7554	0.0644826	0.267501	0.209575	0.310274	0.100187	0.239389	0.277013	0.238759	0.247874	0.192478	0.317615	0.319171	0.250046	0.273054	0.0694228	0.0793805	0.152775	0.255963	0.258788	0.209983	0.185249	0.260737	0.316293	0.232978	0.12613	0.33585	0.320721	0.346874	0.31585	0.21324	0.113359	0.37574	0.15938	0.255616	0.375662	0.222536	0.324972	0.299113	0.056413	0.128563	0.396623	0.210741	0.16198	0.353805	0.226098	0.166597	0.191965	0.257369
	75.1468	0.0608278	0.263152	0.202491	0.305841	0.0992366	0.237376	0.276285	0.239196	0.244124	0.189039	0.321834	0.323004	0.247385	0.275943	0.0647142	0.0801694	0.146257	0.250306	0.256989	0.207144	0.181465	0.258608	0.314551	0.231114	0.125264	0.334195	0.318255	0.342545	0.309421	0.213222	0.105665	0.37156	0.166629	0.253592	0.378204	0.219332	0.324462	0.289675	0.0513448	0.130992	0.393028	0.211856	0.165189	0.353871	0.225077	0.167013	0.194172	0.259862
	75.5382	0.058063	0.258912	0.195634	0.301375	0.099095	0.235049	0.275347	0.239318	0.240088	0.185796	0.326019	0.325509	0.245042	0.278669	0.062484	0.0808448	0.139859	0.244402	0.254964	0.204014	0.177567	0.25689	0.312958	0.229134	0.124404	0.332087	0.315692	0.337974	0.302849	0.212793	0.0979523	0.367259	0.173733	0.25153	0.380332	0.215986	0.323776	0.280319	0.0461066	0.133134	0.389271	0.212979	0.168423	0.353839	0.223715	0.167414	0.196068	0.262031
	75.9296	0.0563176	0.254864	0.189076	0.296876	0.0998028	0.232416	0.274185	0.239107	0.235781	0.182774	0.330138	0.326665	0.242977	0.281214	0.0630293	0.0813916	0.133567	0.238243	0.252693	0.200595	0.173563	0.255561	0.311523	0.227057	0.123532	0.329545	0.313033	0.333176	0.296147	0.211956	0.0902562	0.362871	0.18066	0.249435	0.382047	0.212489	0.322913	0.271067	0.0407177	0.134992	0.385371	0.214094	0.17157	0.353683	0.222018	0.167831	0.197637	0.26386
	76.3209	0.0556848	0.251095	0.182903	0.292348	0.101357	0.229502	0.272813	0.238566	0.231224	0.180001	0.334158	0.326478	0.241155	0.283549	0.0662834	0.0818025	0.12742	0.231843	0.250155	0.196888	0.169472	0.254598	0.31025	0.224905	0.122633	0.326596	0.310277	0.328174	0.289327	0.210717	0.0826174	0.358444	0.187405	0.247318	0.383356	0.208832	0.32186	0.261954	0.035191	0.136594	0.381411	0.215188	0.17453	0.353416	0.220008	0.168302	0.198877	0.265345
	76.7123	0.0561996	0.247686	0.177183	0.287793	0.103757	0.226329	0.27122	0.237709	0.226447	0.17748	0.338055	0.324965	0.239535	0.285647	0.0718507	0.0820729	0.121415	0.225197	0.247334	0.1929	0.165299	0.253963	0.309139	0.222695	0.121688	0.323253	0.307428	0.322983	0.2824	0.209081	0.0750766	0.354008	0.193947	0.245184	0.384259	0.205011	0.320615	0.253001	0.0295463	0.137946	0.377415	0.21621	0.177217	0.353014	0.217684	0.168866	0.199772	0.266472
	77.1037	0.0578236	0.244704	0.171997	0.28322	0.106939	0.222945	0.26943	0.236566	0.221487	0.175214	0.34181	0.322184	0.238076	0.2875	0.0791927	0.0821937	0.115522	0.218305	0.244225	0.188652	0.161064	0.253625	0.308196	0.220452	0.120685	0.319559	0.304491	0.317629	0.27539	0.207079	0.067683	0.349618	0.200263	0.24304	0.384764	0.201029	0.319173	0.244232	0.0238067	0.139075	0.373462	0.217183	0.179565	0.352484	0.215076	0.169561	0.20033	0.267251
	77.4951	0.0604556	0.242196	0.167404	0.278628	0.110862	0.219384	0.267445	0.235165	0.216388	0.173185	0.345411	0.318185	0.236736	0.289075	0.087796	0.0821685	0.109761	0.211165	0.240815	0.184158	0.156776	0.253539	0.307413	0.218188	0.119609	0.315525	0.301474	0.312128	0.268303	0.204726	0.060487	0.345309	0.20634	0.240886	0.384869	0.196887	0.317528	0.235668	0.0179994	0.139998	0.369601	0.218046	0.18152	0.351808	0.212186	0.170406	0.20054	0.267678
	77.8865	0.063958	0.240183	0.163454	0.274019	0.115429	0.215689	0.265276	0.233538	0.211199	0.171364	0.348853	0.313043	0.235467	0.290367	0.0972437	0.0819894	0.104076	0.203757	0.237108	0.179448	0.152447	0.253668	0.306792	0.215921	0.118448	0.311194	0.298391	0.306499	0.261163	0.202062	0.0535465	0.341129	0.212136	0.238717	0.384572	0.192596	0.315685	0.227322	0.0121661	0.140735	0.365884	0.218827	0.183045	0.350966	0.209036	0.171414	0.200404	0.26777
	78.2779	0.0681813	0.238664	0.160186	0.269386	0.120566	0.211896	0.262935	0.231702	0.205974	0.16972	0.35213	0.306825	0.234226	0.291335	0.107224	0.0816632	0.0985069	0.196078	0.233096	0.174544	0.148094	0.253964	0.306319	0.21366	0.117191	0.306589	0.295247	0.300761	0.253976	0.199109	0.0469297	0.33712	0.217633	0.23653	0.383871	0.18816	0.313634	0.21921	0.00636758	0.141314	0.362384	0.219487	0.184121	0.349943	0.20564	0.172572	0.199917	0.267533
	78.6693	0.0729889	0.237608	0.157619	0.264719	0.126182	0.208029	0.26041	0.229664	0.200767	0.168205	0.355237	0.29959	0.232958	0.291964	0.117508	0.0811882	0.0930369	0.188105	0.228782	0.169473	0.143723	0.254383	0.305982	0.211411	0.115829	0.301739	0.292055	0.294922	0.246752	0.195898	0.0407212	0.333312	0.222789	0.234312	0.382758	0.183593	0.311382	0.211337	0.00131232	0.141747	0.359123	0.220027	0.18474	0.348694	0.202006	0.173855	0.19907	0.26698
	79.0607	0.0782595	0.236972	0.155775	0.260005	0.132185	0.204113	0.257709	0.22742	0.195632	0.166784	0.358161	0.291401	0.231619	0.292218	0.127928	0.0805696	0.0877031	0.179833	0.224169	0.164259	0.139355	0.254885	0.305767	0.209183	0.114351	0.296682	0.288817	0.289001	0.2395	0.192455	0.0350426	0.329748	0.227575	0.232057	0.381233	0.178904	0.308923	0.203713	0.00545701	0.142069	0.356177	0.220454	0.184907	0.347205	0.198162	0.175234	0.197862	0.266125
	79.4521	0.0838928	0.236696	0.154655	0.255231	0.138508	0.200158	0.254805	0.224953	0.190617	0.165408	0.360883	0.282301	0.230158	0.292063	0.13836	0.079814	0.0825622	0.171254	0.219258	0.158918	0.134998	0.255422	0.30565	0.206976	0.11275	0.291433	0.285533	0.283001	0.232216	0.188792	0.0300683	0.326442	0.231965	0.229754	0.379289	0.174103	0.306257	0.196339	0.0110115	0.142291	0.353557	0.220734	0.184637	0.345433	0.19411	0.176672	0.196277	0.264975
	79.8434	0.0898	0.236717	0.154257	0.250389	0.14506	0.196182	0.251693	0.22225	0.185768	0.164048	0.363372	0.272355	0.228535	0.291482	0.148708	0.0789226	0.0776306	0.162368	0.214065	0.153471	0.130674	0.255957	0.305613	0.2048	0.111019	0.286037	0.282203	0.276934	0.224911	0.184935	0.0260611	0.323426	0.235928	0.227398	0.37693	0.169208	0.303387	0.189219	0.0164684	0.142445	0.351313	0.22091	0.183957	0.343369	0.18988	0.178145	0.194319	0.263551
	80.2348	0.0959007	0.236972	0.15457	0.245471	0.151796	0.192198	0.248352	0.219296	0.181126	0.162669	0.365588	0.261611	0.226713	0.290438	0.158897	0.0779077	0.0730035	0.15319	0.208595	0.147928	0.126401	0.256446	0.305627	0.202656	0.109149	0.280508	0.278818	0.270807	0.21758	0.180887	0.0233612	0.320704	0.239457	0.224987	0.374162	0.16423	0.30031	0.182357	0.0217658	0.142549	0.349463	0.22094	0.182897	0.340998	0.185484	0.179633	0.191979	0.261856
	80.6262	0.102118	0.237404	0.155562	0.240483	0.158635	0.188228	0.244764	0.216093	0.176729	0.161251	0.367487	0.250155	0.224665	0.288939	0.168866	0.0767679	0.0686841	0.143728	0.202876	0.142309	0.122198	0.256856	0.305675	0.200554	0.107137	0.274885	0.275369	0.264626	0.210236	0.17667	0.0222903	0.318289	0.24253	0.222519	0.37099	0.159196	0.297035	0.175751	0.0268726	0.142625	0.348019	0.220872	0.181501	0.338317	0.180946	0.181134	0.189264	0.259914
	81.0176	0.108376	0.237962	0.157197	0.235438	0.165537	0.184304	0.240931	0.212657	0.17261	0.15978	0.369022	0.23808	0.222376	0.286971	0.178562	0.0755142	0.064736	0.134016	0.196925	0.136628	0.118094	0.257153	0.305727	0.1985	0.104981	0.269194	0.271848	0.258402	0.202882	0.172298	0.0229306	0.316182	0.245149	0.219999	0.36743	0.154131	0.293557	0.169409	0.0317746	0.1427	0.347011	0.220697	0.179814	0.335354	0.176293	0.182652	0.186184	0.257738
	81.409	0.1146	0.238604	0.159408	0.230359	0.172438	0.18046	0.236836	0.209014	0.168799	0.158239	0.37015	0.225504	0.219838	0.284555	0.187939	0.0741467	0.0611741	0.124072	0.190778	0.130911	0.114109	0.257304	0.305765	0.1965	0.102678	0.263462	0.268246	0.252139	0.195532	0.167795	0.0250271	0.314375	0.247304	0.217427	0.363488	0.149076	0.289891	0.163328	0.0364558	0.142787	0.346416	0.220439	0.177894	0.332116	0.171537	0.184197	0.182746	0.255349
	81.8004	0.120718	0.239292	0.162128	0.225275	0.17928	0.176748	0.232495	0.20521	0.165326	0.156624	0.370836	0.212581	0.217059	0.281715	0.196959	0.072669	0.0579972	0.113934	0.184468	0.125188	0.110279	0.257286	0.305771	0.194563	0.100234	0.25773	0.264559	0.245851	0.188205	0.163192	0.0281516	0.312868	0.248993	0.214806	0.359181	0.144075	0.286039	0.157515	0.040907	0.142916	0.346266	0.220138	0.175803	0.328651	0.166715	0.185782	0.178978	0.252777
	82.1918	0.126671	0.239988	0.165269	0.220224	0.186016	0.173208	0.227904	0.20129	0.162216	0.154922	0.371053	0.199466	0.21405	0.278478	0.205586	0.0710848	0.0552535	0.103637	0.178031	0.119492	0.106626	0.257073	0.305723	0.192689	0.0976521	0.252011	0.260785	0.23954	0.180911	0.158517	0.031916	0.311639	0.250215	0.212135	0.354513	0.139184	0.282011	0.151972	0.0451175	0.143093	0.346523	0.21979	0.173614	0.324977	0.161836	0.187405	0.174895	0.250045
	82.5832	0.132407	0.24065	0.168742	0.215247	0.19257	0.169896	0.223076	0.197301	0.15949	0.153126	0.370789	0.186355	0.210831	0.274897	0.213787	0.0693899	0.0529222	0.0932209	0.171515	0.113869	0.103189	0.256651	0.305611	0.190882	0.0949448	0.24635	0.256927	0.233219	0.173679	0.153823	0.0360486	0.310683	0.250953	0.209407	0.349494	0.134468	0.277821	0.146698	0.0490734	0.143344	0.347195	0.219471	0.171407	0.321136	0.15693	0.189063	0.170528	0.247192
	82.9746	0.137889	0.241227	0.172469	0.210385	0.1989	0.166851	0.21802	0.193282	0.157164	0.151221	0.37004	0.173437	0.207429	0.270996	0.221538	0.06759	0.0510776	0.0827498	0.164955	0.108364	0.0999958	0.256	0.305414	0.189135	0.0921227	0.240759	0.252989	0.226891	0.166518	0.14914	0.0403769	0.309972	0.251211	0.206617	0.344129	0.129996	0.273474	0.141701	0.0527643	0.143676	0.348252	0.21917	0.169264	0.317154	0.152012	0.190731	0.165903	0.244246
	83.3659	0.143095	0.241661	0.176362	0.205681	0.204929	0.164109	0.212729	0.189256	0.155249	0.149194	0.368809	0.160929	0.20387	0.266836	0.228816	0.0656775	0.0497493	0.0722998	0.158406	0.10303	0.0970784	0.255113	0.305124	0.187443	0.0892015	0.23527	0.24898	0.220558	0.159454	0.144525	0.0448001	0.309488	0.250965	0.20375	0.338418	0.125847	0.268989	0.136978	0.0561726	0.144098	0.349662	0.218961	0.167274	0.31305	0.147096	0.19238	0.161048	0.241245
	83.7573	0.148012	0.241886	0.180366	0.201175	0.210616	0.161693	0.207216	0.185237	0.153744	0.147034	0.367106	0.149049	0.200189	0.262445	0.235601	0.0636567	0.04899	0.0620195	0.151908	0.0979191	0.0944713	0.253981	0.304722	0.18579	0.0861983	0.229901	0.244904	0.214227	0.152499	0.140013	0.0492572	0.309207	0.250214	0.200796	0.332369	0.122098	0.26437	0.13254	0.0592886	0.144623	0.351408	0.218853	0.165523	0.308857	0.142206	0.19397	0.155999	0.238222
	84.1487	0.152634	0.24183	0.18442	0.196909	0.215907	0.159608	0.201456	0.181224	0.152642	0.144727	0.364936	0.138025	0.196416	0.257873	0.241879	0.0615222	0.048869	0.052144	0.145514	0.0930848	0.092198	0.252597	0.304198	0.184163	0.0831313	0.224662	0.240768	0.207892	0.145666	0.135648	0.0537183	0.309094	0.248946	0.197742	0.325985	0.118831	0.259635	0.128387	0.0621001	0.145245	0.353423	0.218882	0.164091	0.304578	0.137343	0.195461	0.150783	0.235206
	84.5401	0.156954	0.241429	0.188483	0.192924	0.22076	0.157857	0.195455	0.177211	0.151923	0.142274	0.362304	0.128103	0.19259	0.253161	0.247636	0.0592733	0.0493594	0.0431266	0.139278	0.0885815	0.0902927	0.250962	0.303539	0.182547	0.080022	0.219578	0.236576	0.201559	0.138975	0.131467	0.0581663	0.309127	0.247156	0.194577	0.319278	0.116118	0.254791	0.12453	0.0646029	0.145975	0.355692	0.219092	0.163051	0.300251	0.132534	0.196821	0.145449	0.232232
	84.9315	0.160964	0.240626	0.192523	0.18926	0.225154	0.156416	0.189191	0.173191	0.151557	0.139672	0.359205	0.119513	0.18875	0.248344	0.252864	0.0569101	0.0504708	0.0358005	0.133253	0.0844581	0.0887692	0.249072	0.302728	0.180922	0.0768911	0.214641	0.232326	0.19522	0.132433	0.127497	0.0625956	0.30926	0.244855	0.191294	0.312259	0.114027	0.24985	0.120982	0.0667995	0.1468	0.358137	0.219474	0.162458	0.295889	0.12778	0.198023	0.140033	0.229317
	85.3229	0.164642	0.239382	0.196503	0.185961	0.229053	0.155269	0.182658	0.169165	0.151505	0.136937	0.355632	0.11249	0.184944	0.243486	0.257553	0.0544262	0.0521018	0.0315391	0.127506	0.08077	0.087651	0.246934	0.301763	0.179278	0.0737642	0.209875	0.228017	0.188878	0.126065	0.123774	0.0670041	0.309469	0.24204	0.187891	0.304945	0.112613	0.244827	0.117751	0.0686967	0.147724	0.360724	0.22009	0.162354	0.291531	0.1231	0.19906	0.134594	0.226492
	85.7143	0.167958	0.23768	0.200403	0.18307	0.232461	0.154383	0.175856	0.165144	0.15172	0.134088	0.351571	0.107196	0.181225	0.23862	0.261693	0.0518256	0.0541531	0.0317279	0.122094	0.0775588	0.086942	0.244547	0.300629	0.177598	0.0706665	0.20527	0.223643	0.182534	0.119884	0.120314	0.071389	0.309708	0.238741	0.184368	0.297358	0.111911	0.239726	0.114861	0.0703139	0.148735	0.363393	0.220912	0.162754	0.287218	0.118503	0.199927	0.129194	0.22377
	86.1057	0.170875	0.235524	0.204186	0.180634	0.235348	0.153731	0.168776	0.161148	0.152147	0.13115	0.347011	0.10372	0.17765	0.233824	0.265278	0.0490994	0.0565253	0.0363471	0.117092	0.0748726	0.0866452	0.241921	0.299326	0.175876	0.0676287	0.200834	0.219203	0.176188	0.113921	0.117151	0.0757487	0.309945	0.234967	0.180728	0.289516	0.111942	0.234569	0.112323	0.0716698	0.149824	0.366082	0.221985	0.163657	0.282988	0.113993	0.200636	0.123907	0.221175
	86.4971	0.173349	0.232942	0.207826	0.178696	0.237721	0.153285	0.161442	0.157214	0.152733	0.128157	0.341944	0.102014	0.174287	0.229145	0.268301	0.0462508	0.059073	0.0440313	0.112563	0.0727411	0.0867544	0.239063	0.297852	0.174103	0.0646845	0.196567	0.214693	0.169849	0.108203	0.114301	0.0800746	0.310148	0.230747	0.176974	0.281444	0.112696	0.229363	0.110155	0.0727942	0.150987	0.36876	0.223295	0.165035	0.278907	0.109589	0.201202	0.118821	0.218722
	86.8885	0.175344	0.229972	0.211294	0.177295	0.239563	0.153016	0.153854	0.153379	0.153422	0.125135	0.336371	0.101903	0.171199	0.224658	0.270756	0.0432739	0.0617471	0.0534396	0.108576	0.0711893	0.0872492	0.235982	0.29621	0.172274	0.0618708	0.192463	0.210115	0.163521	0.102768	0.111792	0.0843596	0.31028	0.226105	0.173109	0.273157	0.11415	0.224127	0.108373	0.0737143	0.152202	0.371351	0.224846	0.166844	0.275006	0.105281	0.201633	0.11403	0.216425
	87.2798	0.176826	0.226666	0.21456	0.176464	0.240858	0.152905	0.146042	0.149689	0.154163	0.122121	0.330306	0.103102	0.168457	0.220423	0.272639	0.0401676	0.0644462	0.0637725	0.10519	0.0702242	0.0881127	0.232695	0.294411	0.170387	0.0592313	0.18853	0.205475	0.157217	0.09766	0.109647	0.0885909	0.310323	0.221059	0.169132	0.264674	0.116257	0.218873	0.106981	0.0744604	0.153471	0.373843	0.22665	0.169023	0.271349	0.101083	0.201942	0.109647	0.214305
	87.6712	0.177783	0.223076	0.217612	0.176224	0.241602	0.152924	0.138024	0.14618	0.15491	0.119135	0.323776	0.105261	0.166123	0.216492	0.273949	0.0369335	0.0671481	0.0745807	0.10245	0.0698337	0.0893068	0.229212	0.292459	0.168434	0.0568103	0.184752	0.200783	0.150947	0.0929167	0.107883	0.0927573	0.310245	0.215638	0.165042	0.256008	0.118957	0.213617	0.10599	0.0750629	0.154767	0.376169	0.228669	0.171498	0.26796	0.0969857	0.20212	0.105778	0.212367
	88.0626	0.178213	0.219253	0.220429	0.176586	0.241761	0.153056	0.129816	0.14288	0.155626	0.1162	0.316819	0.108032	0.164253	0.212927	0.274687	0.0335685	0.0698303	0.0856273	0.100394	0.0699942	0.0908036	0.225554	0.290374	0.166416	0.0546577	0.181139	0.196057	0.144726	0.088594	0.106528	0.096848	0.310038	0.209848	0.160831	0.24717	0.12218	0.208379	0.105391	0.0755465	0.156088	0.378315	0.230932	0.174188	0.264871	0.0929871	0.202161	0.102544	0.210632
	88.454	0.178132	0.215239	0.223013	0.177541	0.241336	0.153271	0.121448	0.139805	0.156278	0.113326	0.309485	0.111078	0.162892	0.209744	0.274857	0.0300845	0.0724537	0.0967562	0.0990271	0.0706582	0.0925583	0.221735	0.288162	0.164321	0.0528213	0.177674	0.191313	0.138572	0.0847301	0.105586	0.100853	0.309681	0.203718	0.156493	0.238177	0.12585	0.203165	0.105178	0.0759402	0.157413	0.380245	0.233379	0.177007	0.262096	0.0890817	0.202042	0.100051	0.209102
	88.8454	0.177566	0.211075	0.225363	0.179069	0.240297	0.153538	0.112922	0.136958	0.156842	0.110522	0.301831	0.114128	0.162068	0.20698	0.274467	0.0264866	0.0750371	0.107871	0.0983479	0.0717774	0.0945331	0.217777	0.285845	0.162147	0.0513486	0.174361	0.186575	0.132502	0.0813775	0.105077	0.104768	0.309165	0.197258	0.152021	0.229039	0.129893	0.197999	0.105336	0.0762644	0.158727	0.381922	0.236024	0.179872	0.259622	0.0852526	0.201738	0.0983943	0.207788
	89.2368	0.176546	0.206799	0.227491	0.181131	0.238648	0.153819	0.104268	0.134332	0.157298	0.107792	0.293911	0.116944	0.161797	0.204621	0.273525	0.0228037	0.0775129	0.118896	0.0983169	0.0732858	0.0966861	0.2137	0.283432	0.159885	0.05028	0.171191	0.181864	0.126541	0.0785711	0.104994	0.108587	0.308488	0.19049	0.147407	0.219777	0.134229	0.192885	0.105843	0.076545	0.160022	0.383343	0.238818	0.1827	0.257452	0.0815003	0.20123	0.0976474	0.206689
	89.6282	0.175103	0.20245	0.229413	0.183676	0.236386	0.154066	0.0954917	0.13191	0.157626	0.105135	0.285784	0.119344	0.162072	0.20266	0.272045	0.019076	0.0798761	0.129763	0.0988904	0.0751234	0.0989727	0.209521	0.280939	0.157529	0.0496463	0.168156	0.177202	0.120714	0.0763451	0.105335	0.112311	0.307635	0.18344	0.142649	0.210408	0.138789	0.18784	0.106678	0.0768025	0.16127	0.384456	0.241732	0.185412	0.255542	0.0778007	0.200493	0.0978452	0.205802
	90.0196	0.173255	0.198078	0.231139	0.186643	0.233517	0.154233	0.0866222	0.129677	0.157811	0.102558	0.2775	0.121175	0.162873	0.201062	0.270039	0.0153954	0.0820588	0.140421	0.0999976	0.0772243	0.101359	0.205267	0.278382	0.155076	0.0494663	0.16526	0.172609	0.115057	0.0747226	0.106087	0.115939	0.306613	0.176128	0.137748	0.20096	0.143499	0.182872	0.10781	0.0770594	0.162469	0.385271	0.244751	0.187938	0.253879	0.0741544	0.199527	0.0989969	0.205125
	90.411	0.171013	0.193745	0.232692	0.189961	0.230071	0.154262	0.0776941	0.127618	0.157833	0.100058	0.269106	0.122309	0.164162	0.199777	0.267521	0.011965	0.0840029	0.150807	0.101563	0.0795254	0.1038	0.200954	0.27577	0.152524	0.049742	0.162487	0.168102	0.109606	0.0737064	0.107222	0.119468	0.305408	0.1686	0.132711	0.19146	0.148297	0.177989	0.109214	0.0773387	0.163592	0.385742	0.247802	0.190207	0.252417	0.0705445	0.198328	0.101061	0.20464
	90.8024	0.168378	0.189528	0.234073	0.19356	0.226059	0.15411	0.0687537	0.125723	0.157674	0.0976465	0.260647	0.122648	0.165891	0.198762	0.264507	0.00927199	0.0856759	0.16088	0.103508	0.0819699	0.106268	0.196606	0.273126	0.14988	0.0504627	0.159851	0.1637	0.104413	0.0732965	0.108719	0.122895	0.304028	0.160883	0.127544	0.181936	0.153119	0.173206	0.110851	0.0776584	0.164633	0.385867	0.25089	0.192159	0.251129	0.066964	0.196916	0.10398	0.204341
	91.1937	0.165343	0.185517	0.235297	0.197365	0.22153	0.15373	0.0598972	0.123993	0.157312	0.0953279	0.252164	0.122098	0.168003	0.197942	0.261011	0.00831251	0.086996	0.170588	0.105745	0.0844969	0.108726	0.192242	0.270458	0.147151	0.0516019	0.157339	0.159418	0.0995343	0.0734616	0.110533	0.126212	0.302469	0.153028	0.122262	0.17242	0.157906	0.168525	0.112689	0.0780405	0.165573	0.385631	0.253936	0.193732	0.249984	0.0634113	0.19531	0.107659	0.204205
	91.5851	0.161903	0.181812	0.236367	0.201311	0.2165	0.153093	0.0512418	0.122429	0.156728	0.0931112	0.243704	0.120603	0.170435	0.197271	0.257053	0.00978929	0.0879719	0.179896	0.108204	0.0870601	0.111149	0.187885	0.267791	0.144353	0.0531255	0.154967	0.155276	0.0950345	0.0741741	0.112635	0.129409	0.300733	0.145073	0.116874	0.162936	0.162609	0.163963	0.114691	0.0784966	0.166399	0.385012	0.256936	0.194873	0.248945	0.0598721	0.193539	0.112004	0.204223
	91.9765	0.158059	0.178518	0.237286	0.205335	0.211009	0.152181	0.0430251	0.121046	0.155907	0.0910074	0.235318	0.118113	0.173125	0.196673	0.252649	0.013013	0.0885533	0.188775	0.110807	0.0896077	0.113514	0.183558	0.265141	0.141503	0.0549913	0.152739	0.151291	0.0909913	0.0753801	0.114978	0.13247	0.298832	0.137065	0.111393	0.153511	0.167177	0.159522	0.116813	0.0790403	0.167105	0.38403	0.25984	0.195531	0.247998	0.0563562	0.191632	0.116906	0.204377
	92.3679	0.153828	0.17573	0.238065	0.209384	0.205082	0.150981	0.0356203	0.119854	0.154837	0.089017	0.227068	0.114619	0.176007	0.196101	0.247824	0.0170956	0.0887616	0.197196	0.113498	0.0921042	0.115796	0.179278	0.262527	0.13862	0.0571559	0.150664	0.147489	0.0874803	0.0770314	0.117528	0.135383	0.296766	0.12905	0.105826	0.144167	0.171573	0.155216	0.119021	0.0796741	0.167672	0.382655	0.262615	0.195661	0.2471	0.0528518	0.18961	0.122265	0.204654
	92.7593	0.149243	0.173535	0.238704	0.213411	0.198733	0.1495	0.0297214	0.118863	0.153514	0.0871476	0.219022	0.110139	0.179024	0.195497	0.242601	0.0216128	0.0886067	0.205152	0.116217	0.0945152	0.117983	0.175075	0.259975	0.135728	0.0595772	0.148769	0.143896	0.0845868	0.0790714	0.120249	0.138132	0.29456	0.121061	0.100181	0.134923	0.175763	0.151052	0.121271	0.0803959	0.168101	0.380924	0.265257	0.195225	0.246237	0.049371	0.187494	0.127991	0.205048
	93.1507	0.144354	0.171996	0.239224	0.217374	0.191995	0.147739	0.0263815	0.118078	0.151942	0.0853885	0.211257	0.104718	0.182115	0.194805	0.23701	0.0263724	0.0880867	0.212621	0.118923	0.0968169	0.120053	0.170963	0.257497	0.132847	0.0622147	0.147056	0.140539	0.082382	0.0814433	0.123106	0.140705	0.29222	0.113151	0.0944597	0.125806	0.179724	0.147036	0.123527	0.0811973	0.168372	0.378825	0.267709	0.194193	0.245366	0.0459192	0.185288	0.133993	0.205545
	93.5421	0.139227	0.171148	0.239632	0.221235	0.184865	0.145711	0.0265778	0.117498	0.150133	0.0837349	0.203856	0.0984526	0.18523	0.193989	0.231083	0.03129	0.0872481	0.219601	0.121578	0.0989966	0.121999	0.16697	0.255118	0.13	0.0650348	0.145561	0.137452	0.0809317	0.0841017	0.126081	0.143098	0.289774	0.105349	0.0886654	0.116839	0.183438	0.143178	0.125755	0.0820588	0.168486	0.376386	0.269992	0.192545	0.244453	0.0425091	0.182999	0.140206	0.206149
	93.9335	0.133927	0.170996	0.239954	0.224955	0.17738	0.143418	0.0302063	0.117111	0.148102	0.0821686	0.1969	0.0914581	0.188315	0.192986	0.224855	0.0363055	0.0860563	0.226077	0.124147	0.101042	0.123805	0.163114	0.252847	0.127204	0.0680063	0.144292	0.134662	0.080276	0.0869919	0.129145	0.145305	0.287238	0.0977078	0.0828017	0.108056	0.186892	0.139477	0.12792	0.082961	0.168433	0.373626	0.27205	0.190271	0.24346	0.0391759	0.180621	0.146559	0.206851
	94.3248	0.128524	0.171515	0.240206	0.228498	0.169544	0.140858	0.0361999	0.1169	0.14587	0.0806713	0.190469	0.083915	0.19132	0.191766	0.218365	0.0413857	0.0845422	0.232035	0.126609	0.102957	0.125462	0.159415	0.250701	0.124481	0.0711055	0.143279	0.132203	0.0804294	0.0900798	0.132291	0.147332	0.284635	0.0902697	0.0768729	0.0994959	0.190083	0.135943	0.129997	0.0838724	0.168202	0.37055	0.273897	0.18737	0.242331	0.03595	0.178153	0.153003	0.207657
	94.7162	0.123073	0.17265	0.240404	0.231823	0.161394	0.138033	0.0435458	0.116844	0.143459	0.0792256	0.18463	0.076045	0.194199	0.19027	0.211653	0.046498	0.0826639	0.237465	0.128935	0.104737	0.126963	0.155893	0.248685	0.121846	0.0743114	0.142537	0.130095	0.0813784	0.0933185	0.135497	0.149182	0.28199	0.0830909	0.0708887	0.0912106	0.193003	0.132572	0.131956	0.0847661	0.167795	0.367204	0.275506	0.18385	0.241038	0.0329066	0.175597	0.159484	0.208566
	95.1076	0.11762	0.174323	0.24057	0.234892	0.152962	0.134926	0.0516049	0.11692	0.140886	0.0778083	0.179438	0.0681738	0.196901	0.188465	0.204762	0.0516147	0.0804054	0.242342	0.131114	0.10639	0.128297	0.152562	0.246801	0.119318	0.0776075	0.142082	0.128361	0.0830761	0.0966778	0.138757	0.150864	0.279315	0.0762414	0.0648622	0.0832627	0.195655	0.129365	0.133778	0.085609	0.167195	0.363576	0.276857	0.179727	0.239522	0.0301295	0.172959	0.165959	0.209576
	95.499	0.112195	0.176442	0.240703	0.237664	0.144283	0.131536	0.0600414	0.117112	0.138169	0.0764113	0.174927	0.060765	0.199385	0.186308	0.197735	0.0567147	0.0777556	0.246659	0.133122	0.107916	0.129464	0.14944	0.245056	0.116915	0.0809804	0.141937	0.12701	0.0854594	0.100122	0.14205	0.152384	0.276638	0.0697895	0.058811	0.0757238	0.198034	0.126322	0.135441	0.0863722	0.166408	0.359717	0.277964	0.175023	0.237765	0.0277453	0.17026	0.172391	0.210692
	95.8904	0.106818	0.178906	0.240817	0.240104	0.135418	0.127856	0.0686362	0.117409	0.135321	0.0750196	0.171113	0.0544987	0.201608	0.183765	0.190618	0.0617686	0.0746691	0.250391	0.13495	0.109316	0.130452	0.146534	0.243439	0.114653	0.0844167	0.1421	0.126047	0.0884406	0.103618	0.145359	0.153746	0.273965	0.0638362	0.0527574	0.0686842	0.200142	0.123438	0.136926	0.0870305	0.165419	0.355623	0.278778	0.16976	0.235736	0.0259157	0.167522	0.178739	0.211908
	96.2818	0.101511	0.181617	0.240902	0.242184	0.126404	0.123895	0.0772765	0.117814	0.132352	0.0736369	0.167987	0.0503113	0.203537	0.180822	0.183459	0.0667606	0.0711797	0.253536	0.136591	0.110589	0.131269	0.143857	0.241955	0.112553	0.0879068	0.142594	0.125467	0.0919322	0.107143	0.148664	0.154952	0.271317	0.0584712	0.0467254	0.062244	0.20198	0.120715	0.138217	0.0875593	0.164232	0.351325	0.279335	0.163967	0.233429	0.024799	0.164784	0.184977	0.213231
	96.6732	0.0963017	0.184482	0.240955	0.243883	0.117313	0.119672	0.0858599	0.118337	0.129273	0.0722645	0.165521	0.0491974	0.205146	0.177457	0.176306	0.0716634	0.0672599	0.256088	0.138034	0.111728	0.131909	0.141414	0.24059	0.110632	0.0914384	0.143407	0.125256	0.0958383	0.110663	0.15193	0.155999	0.268702	0.053815	0.0407436	0.0565248	0.203548	0.118142	0.139292	0.0879447	0.162843	0.346848	0.279595	0.15767	0.230855	0.0245449	0.162083	0.191069	0.214653
	97.0646	0.0912369	0.187422	0.240964	0.245193	0.108186	0.115218	0.0943243	0.118998	0.126094	0.0709135	0.163667	0.0517509	0.206413	0.17369	0.169216	0.0764611	0.0629657	0.258048	0.139287	0.112732	0.132378	0.139209	0.239342	0.108908	0.095002	0.14455	0.125396	0.100071	0.114166	0.155137	0.156885	0.266131	0.0499687	0.0348421	0.051664	0.204855	0.115726	0.140141	0.0881695	0.161247	0.342197	0.27958	0.150898	0.228019	0.0252037	0.159458	0.196997	0.216179
	97.456	0.0863811	0.190368	0.240915	0.246111	0.0990897	0.110584	0.102617	0.11983	0.122832	0.0695993	0.162361	0.0577515	0.207335	0.169522	0.162247	0.0811333	0.0583212	0.259433	0.140347	0.113594	0.132682	0.137246	0.238201	0.107394	0.0985863	0.146012	0.125859	0.104547	0.117627	0.158246	0.157603	0.26362	0.0470296	0.0290607	0.0478072	0.205906	0.113456	0.140745	0.0882271	0.159455	0.337426	0.279292	0.143682	0.224967	0.0267288	0.156947	0.202738	0.217807
	97.8474	0.0818164	0.193265	0.240806	0.246647	0.0900827	0.105824	0.11069	0.120861	0.119508	0.0683319	0.161532	0.0664391	0.207906	0.164996	0.155461	0.0856603	0.0533667	0.260252	0.141229	0.114317	0.132824	0.135519	0.237157	0.106101	0.102181	0.147783	0.12662	0.109191	0.121038	0.161235	0.158151	0.26117	0.0450537	0.0234585	0.045095	0.206718	0.111333	0.141095	0.0881074	0.157456	0.332529	0.278721	0.136058	0.221714	0.0290015	0.154577	0.208277	0.219541
	98.2387	0.0776354	0.196066	0.240618	0.246816	0.0812272	0.101012	0.118523	0.122123	0.116149	0.0671301	0.161099	0.0769582	0.20814	0.160145	0.148925	0.0900295	0.0481702	0.260529	0.141941	0.114905	0.132818	0.134031	0.236205	0.105036	0.105778	0.149858	0.127648	0.113939	0.12439	0.164075	0.158529	0.258802	0.0440352	0.0181473	0.0436183	0.207308	0.109352	0.14118	0.0878036	0.155267	0.327567	0.277913	0.128067	0.218312	0.031856	0.152371	0.213606	0.221387
	98.6301	0.0739235	0.198722	0.240355	0.246633	0.0726226	0.0962166	0.126081	0.123643	0.112789	0.0659966	0.160983	0.0886375	0.208046	0.155013	0.14271	0.094218	0.0427399	0.260277	0.1425	0.115365	0.132664	0.132769	0.235326	0.104193	0.109366	0.152207	0.128912	0.118729	0.127675	0.166748	0.158741	0.256514	0.0439139	0.0133891	0.0433897	0.2077	0.107504	0.140991	0.08731	0.152882	0.322548	0.276839	0.119754	0.214787	0.0351568	0.150336	0.218713	0.223345
	99.0215	0.0707489	0.201188	0.240006	0.246115	0.0643695	0.0915214	0.133363	0.125435	0.109466	0.0649414	0.161107	0.100978	0.207641	0.149661	0.136886	0.0982165	0.0371544	0.259515	0.142924	0.115717	0.132377	0.13173	0.234515	0.103568	0.112938	0.154827	0.130386	0.123514	0.130896	0.169248	0.158797	0.254323	0.0445522	0.00987133	0.0443204	0.207919	0.10579	0.140528	0.086616	0.15031	0.31751	0.275555	0.111178	0.211174	0.0387766	0.148475	0.223599	0.225428
	99.4129	0.0681442	0.203411	0.23957	0.245276	0.0566562	0.0870121	0.14035	0.127508	0.106218	0.0639606	0.1614	0.113629	0.206943	0.144125	0.13152	0.102004	0.0314226	0.258258	0.143224	0.115973	0.13196	0.1309	0.23375	0.103142	0.116488	0.157679	0.132041	0.128247	0.134043	0.171558	0.158707	0.252231	0.0458001	0.00899471	0.0462354	0.207992	0.104194	0.139785	0.0857178	0.147559	0.312491	0.274042	0.102399	0.207514	0.0426209	0.14678	0.228255	0.227634
	99.8043	0.0661042	0.205335	0.239042	0.244127	0.0497168	0.082779	0.147042	0.129855	0.103083	0.0630509	0.161795	0.126335	0.205967	0.138475	0.126677	0.105568	0.0256389	0.25651	0.143424	0.116159	0.131422	0.130266	0.233018	0.102897	0.120008	0.160751	0.133852	0.132889	0.13712	0.173686	0.158488	0.250238	0.047474	0.0112363	0.0489235	0.20795	0.102714	0.138766	0.0846048	0.144626	0.307494	0.27233	0.0934875	0.203824	0.0466221	0.14524	0.232681	0.229973
	100.196	0.0645898	0.206903	0.238409	0.242675	0.0439237	0.0789298	0.153435	0.132465	0.100098	0.0622073	0.162234	0.138901	0.204734	0.132749	0.122411	0.108895	0.0199484	0.254285	0.143529	0.116287	0.130773	0.129815	0.232299	0.102802	0.123492	0.164007	0.135794	0.137403	0.140114	0.175623	0.158153	0.248351	0.0494238	0.0151526	0.0521681	0.207816	0.101336	0.13747	0.0832759	0.14153	0.302573	0.270436	0.0845222	0.200157	0.0507112	0.143845	0.23687	0.232443
	100.587	0.0635378	0.208058	0.237665	0.240929	0.0397363	0.075571	0.159512	0.135315	0.0972919	0.0614181	0.162662	0.151192	0.203258	0.127016	0.118767	0.111969	0.0147517	0.251583	0.14356	0.116376	0.130015	0.129524	0.231572	0.102831	0.126932	0.167418	0.137843	0.141755	0.143024	0.177373	0.157715	0.246554	0.0515026	0.0196565	0.0557822	0.207615	0.100051	0.135901	0.0817287	0.138264	0.297713	0.268347	0.0755891	0.196536	0.054851	0.14258	0.240815	0.235042
	100.978	0.0628814	0.20876	0.236785	0.2389	0.0376354	0.0728301	0.165277	0.138386	0.0946897	0.0606831	0.163026	0.163083	0.201562	0.121331	0.115774	0.114785	0.0112127	0.248419	0.143523	0.116436	0.129161	0.129381	0.230821	0.102951	0.13032	0.170961	0.139973	0.145917	0.145839	0.178929	0.157183	0.24485	0.0535989	0.0243193	0.0596143	0.207366	0.0988492	0.134065	0.0799675	0.134849	0.292959	0.26611	0.066788	0.19302	0.0589908	0.141443	0.244512	0.237765
	101.37	0.062559	0.208979	0.235755	0.2366	0.0378793	0.0708219	0.170702	0.141652	0.0923089	0.0599918	0.163275	0.174488	0.199668	0.115761	0.113445	0.117325	0.011399	0.244803	0.143434	0.116473	0.128213	0.12936	0.23002	0.10313	0.133646	0.174591	0.142157	0.149858	0.148544	0.180277	0.156561	0.243218	0.0556238	0.0289651	0.0635459	0.207088	0.0977178	0.13196	0.078004	0.131284	0.288303	0.263694	0.0582372	0.189656	0.0630984	0.140425	0.247945	0.240597
	101.761	0.0625242	0.208712	0.234548	0.234054	0.0403102	0.0696571	0.175785	0.145094	0.0901622	0.0593488	0.16336	0.185313	0.197602	0.11039	0.111776	0.119589	0.015414	0.24075	0.143304	0.11649	0.127185	0.129445	0.229159	0.103342	0.136899	0.178292	0.144368	0.153556	0.151137	0.181409	0.155854	0.241649	0.0575018	0.033511	0.0674956	0.206795	0.0966537	0.129597	0.0758503	0.127584	0.283757	0.261149	0.0500937	0.186504	0.0671428	0.139532	0.251113	0.243531
	102.153	0.0627433	0.207978	0.233143	0.23129	0.0444611	0.0694113	0.180504	0.148698	0.0882567	0.0587515	0.163235	0.195468	0.195402	0.105283	0.110746	0.121567	0.0212725	0.236288	0.143143	0.116481	0.126082	0.129613	0.228216	0.103555	0.140065	0.182019	0.146573	0.156988	0.1536	0.182298	0.15506	0.240127	0.0591926	0.0379112	0.0714026	0.206499	0.0956412	0.126975	0.0735305	0.123764	0.279339	0.258463	0.0425776	0.183635	0.0710883	0.13876	0.254001	0.246542
	102.544	0.0631863	0.206816	0.231522	0.228347	0.0497745	0.0701165	0.184848	0.152449	0.0865954	0.0582037	0.162857	0.204865	0.193102	0.100543	0.110315	0.123259	0.0278836	0.231437	0.14297	0.116447	0.124913	0.129843	0.227184	0.103751	0.143129	0.185757	0.148747	0.160137	0.155934	0.182935	0.154182	0.238631	0.0606495	0.0421401	0.0752311	0.206213	0.0946798	0.124105	0.0710642	0.119827	0.27503	0.255656	0.0360223	0.181099	0.0749207	0.138115	0.256607	0.249619
	102.935	0.0638219	0.205285	0.229664	0.225265	0.0558226	0.0717607	0.188817	0.15634	0.0851787	0.0577087	0.162192	0.213398	0.190752	0.0962359	0.11043	0.124665	0.0347847	0.226233	0.142792	0.116382	0.12369	0.130119	0.226052	0.103907	0.146078	0.189473	0.150861	0.162989	0.15813	0.183293	0.153221	0.237155	0.0618622	0.0461836	0.0789582	0.205948	0.0937578	0.120993	0.0684797	0.115801	0.270868	0.252758	0.0309217	0.178973	0.0786073	0.137592	0.258925	0.252738
	103.327	0.0646055	0.203457	0.227567	0.22209	0.0622746	0.074278	0.192398	0.160358	0.0840031	0.0572616	0.161216	0.220981	0.188394	0.0924509	0.111023	0.125781	0.0418289	0.220696	0.142632	0.116288	0.122415	0.130417	0.22481	0.104004	0.148896	0.193145	0.152892	0.165534	0.160191	0.183367	0.152182	0.235673	0.0628096	0.0500335	0.0825701	0.205714	0.0928704	0.117649	0.065801	0.111687	0.266822	0.249755	0.0278975	0.177286	0.0821395	0.137183	0.260951	0.255883
	103.718	0.0654817	0.201406	0.225218	0.218865	0.0689393	0.0775837	0.195614	0.164489	0.0830637	0.0568626	0.159917	0.227515	0.186079	0.0892404	0.112016	0.126616	0.0488889	0.214859	0.142497	0.116168	0.121099	0.130727	0.223459	0.104027	0.151572	0.196761	0.154822	0.167766	0.162117	0.183151	0.151079	0.234185	0.0634912	0.0536864	0.086062	0.205523	0.0920129	0.114089	0.0630528	0.107511	0.262926	0.246703	0.0274078	0.176088	0.0854977	0.136875	0.26269	0.259039
	104.11	0.0663849	0.199205	0.222623	0.21563	0.0756617	0.0815626	0.198462	0.16871	0.0823513	0.0564937	0.158302	0.232932	0.183851	0.0866432	0.113328	0.127167	0.0559507	0.20874	0.142403	0.116026	0.119743	0.131028	0.221988	0.103957	0.154091	0.20029	0.156639	0.169679	0.163908	0.182646	0.149922	0.232672	0.0639069	0.0571379	0.0894263	0.205383	0.0911735	0.110321	0.0602603	0.103283	0.259165	0.243576	0.0293201	0.175389	0.0886682	0.136638	0.264137	0.262184
	104.501	0.0672468	0.196923	0.219781	0.212418	0.0823523	0.0861072	0.200967	0.172988	0.0818545	0.0561429	0.156388	0.237172	0.18175	0.0846756	0.114873	0.127444	0.0629794	0.202354	0.14236	0.115876	0.118351	0.131308	0.220402	0.103779	0.156446	0.203733	0.158337	0.171275	0.165571	0.181871	0.148731	0.231128	0.064053	0.0603843	0.0926613	0.205302	0.0903517	0.106369	0.0574421	0.0990173	0.255546	0.240419	0.0329616	0.175189	0.091646	0.136446	0.265301	0.265313
	104.892	0.0680084	0.19462	0.216694	0.209253	0.0889339	0.0911034	0.203144	0.177281	0.0815573	0.0557839	0.154207	0.240205	0.179815	0.0833043	0.116571	0.127449	0.0699655	0.195718	0.142368	0.115722	0.116924	0.131554	0.218691	0.103471	0.158626	0.20706	0.159912	0.172552	0.1671	0.180834	0.147521	0.229546	0.0639424	0.0634187	0.0957604	0.205281	0.0895323	0.102243	0.0546234	0.0947355	0.252078	0.237225	0.0375834	0.175475	0.0944104	0.13626	0.266176	0.268405
	105.284	0.0686226	0.192347	0.213369	0.206156	0.0953392	0.0964464	0.205005	0.181536	0.0814388	0.0553923	0.1518	0.242026	0.178067	0.0824939	0.118343	0.127189	0.0769209	0.188835	0.142437	0.115579	0.115459	0.131749	0.216857	0.10302	0.160624	0.210272	0.161368	0.17351	0.1685	0.179564	0.146311	0.22791	0.0635668	0.0662323	0.0987194	0.205323	0.0887142	0.0979662	0.0518217	0.0904409	0.248738	0.233997	0.0426361	0.1762	0.0969622	0.136043	0.266765	0.27145
	105.675	0.0690649	0.190157	0.209798	0.203136	0.101526	0.102039	0.206574	0.1857	0.0814737	0.054946	0.149216	0.242638	0.176532	0.0821481	0.120121	0.126675	0.0838001	0.18172	0.142555	0.115448	0.11396	0.131888	0.214896	0.102406	0.162433	0.21335	0.162707	0.174153	0.16976	0.178073	0.145115	0.22622	0.0629428	0.0688162	0.101536	0.205417	0.0878857	0.0935566	0.0490626	0.0861617	0.245551	0.230762	0.0477692	0.177337	0.0992817	0.135761	0.267066	0.274432
	106.067	0.0693292	0.188098	0.205987	0.200206	0.107429	0.107782	0.207844	0.189716	0.0816297	0.0544203	0.146502	0.242075	0.175219	0.0821845	0.121844	0.125912	0.0906151	0.174377	0.142724	0.115332	0.112417	0.131952	0.212803	0.101614	0.164045	0.21628	0.163932	0.17448	0.170876	0.176381	0.143943	0.224453	0.0620679	0.0711604	0.104207	0.205555	0.087041	0.0890301	0.0463695	0.0819003	0.242475	0.227487	0.0527709	0.178812	0.101365	0.135382	0.267071	0.277332
	106.458	0.069428	0.186226	0.201925	0.197373	0.113024	0.113596	0.208835	0.193535	0.081871	0.0538092	0.143708	0.240357	0.174135	0.0824798	0.123461	0.124917	0.097295	0.166823	0.14293	0.115224	0.110836	0.131937	0.210585	0.100637	0.165453	0.219061	0.165043	0.174498	0.171842	0.174499	0.142806	0.222609	0.0609565	0.073259	0.106739	0.205721	0.0861776	0.084413	0.0437693	0.0776801	0.239532	0.224218	0.0575095	0.180586	0.103203	0.134893	0.266781	0.280136
	106.849	0.0693857	0.184599	0.197614	0.194644	0.11826	0.119395	0.209538	0.197118	0.0821563	0.0531033	0.140878	0.237515	0.173282	0.0829254	0.124929	0.123696	0.103817	0.159075	0.143164	0.115112	0.109208	0.131829	0.208235	0.0994647	0.166647	0.221667	0.166036	0.174208	0.172643	0.172425	0.141707	0.220669	0.0596236	0.0751079	0.109136	0.205895	0.0852857	0.0797204	0.0412933	0.0735149	0.23669	0.220916	0.0619041	0.182595	0.104784	0.134279	0.266183	0.282818
	107.241	0.0692288	0.183285	0.193055	0.192034	0.123121	0.125117	0.209959	0.200438	0.0824433	0.0523145	0.138053	0.233569	0.172655	0.0834125	0.126212	0.12227	0.11013	0.151149	0.143417	0.114986	0.107537	0.131622	0.205764	0.0981018	0.16762	0.224106	0.166905	0.173621	0.173283	0.170168	0.140652	0.218626	0.058082	0.0767092	0.111411	0.206057	0.0843704	0.0749823	0.0389689	0.0694158	0.233945	0.217615	0.065904	0.184792	0.106113	0.133545	0.265279	0.285365
	107.632	0.0689823	0.18235	0.188249	0.189551	0.127587	0.130708	0.210103	0.20348	0.0826896	0.0514559	0.135267	0.228526	0.17225	0.0838323	0.127284	0.120651	0.116179	0.143079	0.143673	0.114824	0.10582	0.131309	0.203174	0.0965492	0.168361	0.226359	0.167642	0.172746	0.173749	0.167718	0.139643	0.216474	0.0563669	0.0780689	0.113578	0.206183	0.0834232	0.0702226	0.0368302	0.0654091	0.231295	0.214312	0.0694753	0.187139	0.107177	0.132697	0.264062	0.287749
	108.023	0.0686585	0.181858	0.183214	0.187211	0.131645	0.136127	0.209967	0.206237	0.0828557	0.0505475	0.132556	0.222402	0.172053	0.0841149	0.128118	0.118857	0.121963	0.134881	0.143931	0.114618	0.104055	0.13088	0.200476	0.0948202	0.168863	0.228431	0.16824	0.171594	0.174047	0.165085	0.138684	0.214199	0.0544959	0.0791967	0.115651	0.206257	0.0824505	0.0654739	0.0349006	0.0614973	0.228709	0.211001	0.0725978	0.189586	0.107988	0.131751	0.262535	0.289957
	108.415	0.0682593	0.181867	0.177959	0.185021	0.135306	0.141353	0.209578	0.20871	0.0829083	0.0496157	0.129953	0.2152	0.172056	0.0841752	0.128697	0.116906	0.127436	0.126588	0.144171	0.114353	0.102245	0.130338	0.197683	0.0929242	0.16912	0.230319	0.168692	0.170184	0.174175	0.162271	0.137785	0.211812	0.0525157	0.0801058	0.117646	0.206258	0.0814496	0.0607768	0.0332066	0.0577083	0.226215	0.207722	0.075255	0.192116	0.108544	0.130718	0.2607	0.291971
	108.806	0.0677725	0.182417	0.17252	0.182988	0.138559	0.146369	0.208935	0.210899	0.0828205	0.0486752	0.127492	0.206949	0.172238	0.0839805	0.129003	0.114812	0.132636	0.118217	0.144396	0.114025	0.100384	0.129673	0.194802	0.0908751	0.169129	0.232019	0.168995	0.168531	0.174138	0.159291	0.13695	0.209302	0.0504549	0.080808	0.119572	0.206172	0.0804218	0.0561712	0.0317617	0.0540464	0.223774	0.204442	0.0774378	0.194679	0.108851	0.129607	0.258561	0.29378
	109.198	0.0671772	0.18353	0.166916	0.181112	0.141424	0.151173	0.208077	0.212798	0.0825748	0.0477491	0.125207	0.197679	0.172581	0.0834835	0.129024	0.112598	0.137554	0.109786	0.14459	0.113634	0.0984754	0.128889	0.191855	0.0886859	0.16889	0.233547	0.169151	0.166658	0.173945	0.156172	0.136195	0.206684	0.0483583	0.0813155	0.12144	0.205986	0.0793718	0.0517184	0.0305736	0.0505268	0.221419	0.201214	0.0791392	0.197256	0.108921	0.128424	0.256132	0.29538
	109.589	0.0664505	0.1852	0.161185	0.179381	0.14389	0.155757	0.207015	0.214397	0.0821599	0.0468445	0.123134	0.187452	0.173058	0.0826688	0.128749	0.110274	0.142225	0.101315	0.144748	0.113181	0.096513	0.127983	0.188845	0.086364	0.168402	0.234891	0.169168	0.164583	0.173594	0.152937	0.135528	0.20396	0.0462675	0.0816364	0.123252	0.205688	0.0782943	0.0474777	0.0296402	0.0471635	0.219131	0.198008	0.0803578	0.199798	0.108754	0.127159	0.253416	0.296761
	109.98	0.0655693	0.187395	0.155358	0.177777	0.145962	0.160114	0.205777	0.215674	0.0815716	0.0459749	0.121306	0.176352	0.173635	0.0815246	0.128172	0.10786	0.146676	0.0928064	0.144861	0.112681	0.0944957	0.126955	0.185791	0.0839212	0.167673	0.236073	0.169058	0.162329	0.173098	0.14963	0.134961	0.201137	0.044217	0.0817763	0.125011	0.205272	0.0771979	0.0435355	0.0289458	0.0439548	0.216921	0.19485	0.081099	0.202265	0.108368	0.125805	0.25043	0.29793
	110.372	0.0645215	0.190058	0.149465	0.176273	0.147632	0.16423	0.204388	0.216608	0.080809	0.0451549	0.119754	0.164472	0.17428	0.0800324	0.127293	0.105371	0.150894	0.0842816	0.144911	0.112133	0.0924236	0.125809	0.182698	0.0813596	0.166706	0.237083	0.168834	0.159916	0.17245	0.146276	0.134504	0.198231	0.0422568	0.081738	0.126719	0.204723	0.076076	0.0399852	0.028471	0.0409206	0.214803	0.191743	0.0813737	0.204621	0.107761	0.124338	0.247177	0.298882
	110.763	0.0633028	0.193106	0.143543	0.174836	0.14888	0.168081	0.202852	0.217169	0.0798713	0.0444021	0.1185	0.151935	0.174948	0.0782016	0.126114	0.102819	0.154909	0.0757441	0.144893	0.11155	0.0902906	0.124542	0.179576	0.0786891	0.165508	0.23793	0.168514	0.157364	0.171655	0.142914	0.13416	0.195241	0.0404124	0.081522	0.128372	0.204034	0.0749357	0.0369414	0.0281815	0.038052	0.212757	0.188671	0.0812041	0.206803	0.106949	0.122743	0.243669	0.299622
	111.155	0.0619224	0.19644	0.137614	0.173431	0.149704	0.171644	0.201197	0.217338	0.0787572	0.043756	0.117555	0.138847	0.1756	0.0760101	0.124643	0.100223	0.158665	0.0672181	0.14478	0.110929	0.0881036	0.123161	0.176435	0.0759158	0.164086	0.23862	0.168107	0.154694	0.170709	0.139567	0.133932	0.192186	0.0387324	0.081131	0.129977	0.20319	0.0737765	0.0345305	0.0280466	0.0353628	0.210819	0.185673	0.0806177	0.208793	0.105939	0.121003	0.239913	0.300151
	111.546	0.060398	0.199952	0.13172	0.172024	0.150074	0.174885	0.19941	0.217102	0.0774607	0.0432558	0.11692	0.125329	0.176189	0.0734749	0.122889	0.0975899	0.162164	0.0587247	0.144567	0.110266	0.0858584	0.121662	0.173276	0.0730511	0.162446	0.239143	0.167626	0.151922	0.169607	0.136248	0.133814	0.189059	0.0372386	0.0805677	0.131534	0.202181	0.0726006	0.0328669	0.0280258	0.0328509	0.208953	0.182705	0.0796525	0.210542	0.104737	0.119106	0.235913	0.300464
	111.937	0.0587525	0.203537	0.125887	0.170584	0.15	0.177784	0.197506	0.216461	0.0759738	0.0429607	0.116578	0.111477	0.176674	0.0705946	0.120865	0.0949408	0.165356	0.0502968	0.144231	0.109554	0.0835647	0.120051	0.170115	0.0701136	0.160593	0.239518	0.167075	0.149069	0.168352	0.132974	0.133801	0.185877	0.0359652	0.0798406	0.133051	0.200995	0.0714169	0.0320442	0.0280857	0.0305142	0.207189	0.179817	0.0783515	0.212045	0.103363	0.117054	0.231682	0.300565
	112.329	0.0570111	0.207092	0.12016	0.169087	0.149471	0.180321	0.195479	0.215433	0.074285	0.0429245	0.116498	0.0973776	0.17702	0.0673955	0.118586	0.0922814	0.168211	0.0419872	0.143762	0.108777	0.0812272	0.11833	0.166951	0.0671213	0.158532	0.239728	0.166453	0.146154	0.166936	0.129737	0.13388	0.18264	0.0349303	0.0789613	0.134538	0.199618	0.0702241	0.0320813	0.0281927	0.0283619	0.205504	0.176984	0.0767625	0.213293	0.101821	0.114853	0.22722	0.300445
	112.72	0.0551918	0.210537	0.114584	0.16752	0.148503	0.182492	0.193326	0.214042	0.072384	0.0431907	0.116635	0.0831105	0.177192	0.0639288	0.116068	0.0896281	0.170733	0.0338572	0.143151	0.107928	0.0788537	0.116501	0.163799	0.0641049	0.15627	0.239794	0.165758	0.143196	0.165372	0.126549	0.134038	0.179354	0.0341405	0.0779459	0.136001	0.198045	0.0690369	0.0329376	0.0283186	0.0263783	0.203899	0.174229	0.0749375	0.214291	0.100137	0.112522	0.222544	0.300108
	113.112	0.053308	0.213809	0.109209	0.165872	0.147123	0.184307	0.191063	0.212326	0.0702631	0.0437912	0.116931	0.0687357	0.177169	0.0602499	0.113325	0.0869904	0.172893	0.026035	0.142387	0.106992	0.0764586	0.114572	0.160666	0.0610901	0.153813	0.239711	0.164982	0.140217	0.163655	0.123403	0.134262	0.176034	0.0336024	0.076814	0.137451	0.196268	0.067855	0.0344959	0.028444	0.024574	0.202381	0.171571	0.0729281	0.215072	0.0983203	0.110081	0.217662	0.299547
	113.503	0.051361	0.216864	0.104104	0.164142	0.145349	0.185778	0.188685	0.210323	0.06792	0.0447213	0.117318	0.0543338	0.176928	0.0564766	0.110371	0.0843754	0.174749	0.018765	0.141474	0.105969	0.0740467	0.112543	0.157561	0.0581103	0.151169	0.239487	0.164123	0.137236	0.161802	0.120313	0.134539	0.17268	0.0332906	0.0755848	0.13889	0.194292	0.0666912	0.0366183	0.0285495	0.0229326	0.200919	0.168996	0.0707901	0.21564	0.0963948	0.107556	0.21259	0.298767
	113.894	0.0493469	0.219677	0.0993244	0.16233	0.143233	0.186934	0.186222	0.20807	0.0653613	0.0459654	0.117726	0.0399885	0.176462	0.0527213	0.107222	0.0817963	0.176303	0.0127717	0.140403	0.104861	0.0716361	0.110427	0.154498	0.0551943	0.148352	0.23914	0.163178	0.134278	0.15982	0.117292	0.13486	0.169317	0.033193	0.0742787	0.140322	0.192118	0.06555	0.0391569	0.0286292	0.0214529	0.199547	0.166559	0.0685783	0.216041	0.0943796	0.104965	0.207349	0.297774
	114.286	0.0472586	0.22223	0.0949495	0.160435	0.140794	0.18779	0.183681	0.205595	0.0626002	0.0474823	0.118083	0.0258486	0.17576	0.049154	0.103893	0.0792517	0.177613	0.0101337	0.139185	0.103676	0.0692325	0.108228	0.151479	0.0523673	0.145374	0.238663	0.162149	0.131359	0.157719	0.114358	0.135214	0.165951	0.0332624	0.0729106	0.141742	0.189756	0.0644361	0.0419811	0.0286734	0.0201307	0.198225	0.164226	0.066352	0.216276	0.092289	0.102319	0.201954	0.296574
	114.677	0.0450925	0.224513	0.0910392	0.158454	0.13808	0.188369	0.181093	0.202916	0.0596589	0.0492266	0.118325	0.012349	0.174814	0.0459563	0.100398	0.0767537	0.178713	0.0127327	0.137816	0.102432	0.0668497	0.105954	0.148519	0.0496557	0.142251	0.238083	0.161044	0.128503	0.155517	0.111546	0.135597	0.162605	0.0334694	0.0714932	0.143145	0.18722	0.063359	0.0449876	0.028683	0.0189511	0.196981	0.162049	0.064173	0.216364	0.0901496	0.0996235	0.196432	0.295186
	115.069	0.0428595	0.226505	0.0876601	0.156379	0.135107	0.188676	0.178477	0.200045	0.0565639	0.0511598	0.118395	0.00582354	0.173621	0.0433137	0.0967545	0.0742983	0.179608	0.0182106	0.136299	0.101142	0.0645	0.103616	0.145616	0.0470745	0.139001	0.23739	0.159873	0.125724	0.153214	0.108875	0.136001	0.159296	0.0337646	0.0700339	0.14452	0.184518	0.062315	0.0480854	0.0286556	0.0179247	0.195796	0.16001	0.0621066	0.216309	0.0879672	0.0968643	0.190797	0.293616
	115.46	0.0405868	0.22818	0.0848641	0.154199	0.131897	0.188707	0.175844	0.196986	0.0533443	0.0532408	0.118249	0.0167955	0.172172	0.0414305	0.0929819	0.0718906	0.180333	0.0245204	0.13464	0.0998252	0.0621913	0.101217	0.142778	0.0446462	0.13564	0.236605	0.158652	0.123037	0.150829	0.106378	0.13642	0.156032	0.0341059	0.0685368	0.145857	0.181668	0.0613147	0.0512164	0.0285914	0.0170365	0.194668	0.158119	0.0602228	0.216095	0.0857669	0.0940284	0.185074	0.291889
	115.851	0.038331	0.229498	0.0826838	0.151898	0.128473	0.188459	0.173222	0.193746	0.050029	0.0554508	0.117854	0.0292374	0.170462	0.04044	0.0891008	0.0695304	0.180835	0.0309848	0.132827	0.0984889	0.0599431	0.0987714	0.140002	0.0423864	0.132186	0.235725	0.157393	0.120453	0.148359	0.104067	0.136848	0.15284	0.0344554	0.0670053	0.147148	0.178677	0.0603517	0.0543228	0.0284918	0.016304	0.193607	0.156399	0.0585897	0.215735	0.0835551	0.0910872	0.179278	0.290013
	116.243	0.0361755	0.230414	0.0811444	0.149466	0.124831	0.18791	0.1706	0.190332	0.0466424	0.0577651	0.11719	0.0412247	0.168483	0.0404415	0.0851326	0.0672141	0.181119	0.0373707	0.13087	0.0971385	0.0577636	0.0962793	0.137285	0.0403179	0.128654	0.23475	0.156111	0.117977	0.145813	0.101952	0.137274	0.149716	0.0347632	0.0654416	0.148385	0.175559	0.0594323	0.0573712	0.0283522	0.0157285	0.192576	0.154813	0.0572755	0.215202	0.0813472	0.08802	0.173425	0.288004
	116.634	0.034237	0.230878	0.080231	0.146891	0.121007	0.187058	0.167994	0.186767	0.0432062	0.060168	0.116243	0.052513	0.166231	0.0414365	0.0810993	0.0649476	0.18113	0.043573	0.128756	0.0957711	0.0556746	0.0937533	0.134628	0.0384684	0.125059	0.233694	0.154812	0.115617	0.143194	0.100032	0.137688	0.146682	0.0350037	0.0638529	0.149565	0.17232	0.0585542	0.0603278	0.0281751	0.0153234	0.191601	0.153409	0.0563368	0.21452	0.0791579	0.0848062	0.167532	0.285874
	117.025	0.0326579	0.230851	0.079927	0.144173	0.117008	0.185893	0.165392	0.183079	0.0397368	0.0626394	0.115003	0.0629911	0.163706	0.0433426	0.0770228	0.0627222	0.180843	0.0495195	0.126491	0.094374	0.053691	0.091197	0.132021	0.0368645	0.121413	0.23254	0.1535	0.113372	0.140501	0.09829	0.138072	0.143733	0.0351268	0.0622483	0.150685	0.168968	0.0577161	0.0631673	0.0279532	0.0151091	0.190626	0.152142	0.0558183	0.213692	0.0769924	0.0814345	0.161605	0.283625
	117.417	0.0315964	0.230311	0.0801746	0.141322	0.112881	0.184426	0.162792	0.179309	0.0362506	0.0651452	0.11346	0.072595	0.16091	0.0460513	0.0729227	0.0605464	0.180258	0.0551719	0.124073	0.0929403	0.0518294	0.0886171	0.129467	0.0355423	0.117726	0.23131	0.15217	0.111244	0.137749	0.0967158	0.138415	0.140879	0.0351114	0.0606428	0.151748	0.165516	0.0569229	0.0658737	0.0276882	0.0150867	0.189667	0.151048	0.0557447	0.212748	0.0748725	0.0779097	0.155663	0.281268
	117.808	0.0312052	0.229256	0.0809166	0.138354	0.108672	0.182677	0.160201	0.175509	0.0327657	0.0676551	0.111602	0.0812953	0.15786	0.0493916	0.0688178	0.0584143	0.179351	0.0604822	0.121507	0.0914531	0.0501104	0.0860237	0.126957	0.0345244	0.114012	0.22999	0.150815	0.109231	0.134935	0.0952817	0.138697	0.138123	0.0349198	0.0590549	0.152753	0.161968	0.0561666	0.0684232	0.0273757	0.0152806	0.188682	0.150111	0.0561187	0.211729	0.0727993	0.0742407	0.149713	0.2788
	118.2	0.0315997	0.227717	0.0820749	0.135298	0.104434	0.180669	0.157607	0.171724	0.0293074	0.0701195	0.10941	0.0890636	0.154571	0.0532188	0.0647235	0.0563301	0.178182	0.0654289	0.118806	0.0899107	0.048541	0.0834187	0.124494	0.0338312	0.11028	0.228595	0.149427	0.107328	0.13208	0.0939797	0.138905	0.13546	0.0345295	0.0575039	0.153698	0.158344	0.0554555	0.0708096	0.0270162	0.0156771	0.187652	0.149329	0.0569229	0.210662	0.0707929	0.0704566	0.143773	0.276231
	118.591	0.032838	0.22575	0.083569	0.132187	0.100251	0.178444	0.15504	0.168005	0.0259146	0.0724986	0.10686	0.0958925	0.151073	0.0573748	0.060654	0.0542965	0.176751	0.0699853	0.115975	0.0883103	0.0471369	0.0808167	0.122075	0.0334643	0.106545	0.227131	0.147994	0.105536	0.129188	0.0927965	0.139027	0.132907	0.0339257	0.0560106	0.154581	0.154656	0.0547799	0.0730141	0.0266123	0.0162849	0.186571	0.14873	0.0581179	0.209608	0.0688575	0.0665823	0.137855	0.273563
	118.982	0.0349064	0.223429	0.0853272	0.129057	0.0961722	0.176026	0.152496	0.164387	0.0226437	0.0747502	0.103931	0.101756	0.147393	0.0617052	0.0566219	0.0523105	0.175122	0.074137	0.11304	0.0866593	0.0458978	0.0782196	0.119699	0.0334062	0.10282	0.225595	0.14651	0.103848	0.126277	0.0917305	0.139052	0.130453	0.0330869	0.0545901	0.155393	0.150925	0.0541439	0.0750323	0.0261639	0.0170821	0.185388	0.148271	0.0596525	0.208577	0.067001	0.0626516	0.131976	0.270805
	119.374	0.0377391	0.220846	0.0872678	0.125941	0.0922822	0.173448	0.150008	0.160895	0.0195789	0.0768394	0.1006	0.106628	0.143569	0.0660918	0.0526389	0.0503822	0.173317	0.0778819	0.110006	0.0849737	0.0448244	0.0756404	0.11737	0.033631	0.0991219	0.22401	0.144974	0.102262	0.123364	0.0907918	0.138976	0.128117	0.0320215	0.0532549	0.156123	0.147173	0.0535412	0.0768563	0.0256797	0.0180534	0.184126	0.147998	0.0614616	0.20761	0.0652327	0.0586885	0.126153	0.26797
	119.765	0.041233	0.21809	0.0893379	0.122867	0.0886206	0.170722	0.147592	0.157543	0.0168393	0.0787499	0.0968558	0.110471	0.139637	0.0703931	0.0487178	0.0485052	0.171339	0.0812093	0.106898	0.0832642	0.0439134	0.0730858	0.115079	0.0340932	0.0954658	0.222364	0.143388	0.100768	0.120455	0.0899818	0.138796	0.125896	0.0307176	0.0520098	0.156757	0.143419	0.0529656	0.0784791	0.0251598	0.0191808	0.18273	0.147861	0.0634776	0.206706	0.0635457	0.054708	0.1204	0.265068
	120.157	0.0452726	0.215248	0.0914698	0.119856	0.0852313	0.167855	0.145259	0.15433	0.0145899	0.0804638	0.0926965	0.113234	0.135631	0.0745268	0.044871	0.0466905	0.169207	0.0841305	0.103726	0.0815516	0.0431511	0.0705618	0.112835	0.0347542	0.0918684	0.22068	0.141763	0.0993646	0.11757	0.0893193	0.138514	0.123799	0.0291943	0.0508547	0.15728	0.139688	0.052416	0.0799048	0.0246138	0.0204293	0.181222	0.147879	0.0656299	0.20586	0.061949	0.0507182	0.114737	0.262119
	120.548	0.049738	0.212386	0.0936232	0.116922	0.0821447	0.164848	0.143032	0.151254	0.0130309	0.0819868	0.0881359	0.114881	0.131591	0.0784011	0.041113	0.0449369	0.166854	0.0866374	0.1005	0.0798399	0.0425325	0.0680801	0.110624	0.0355716	0.0883447	0.218945	0.140108	0.0980394	0.114707	0.0887998	0.138131	0.121831	0.0274565	0.0497866	0.157679	0.135995	0.0518771	0.0811251	0.024042	0.0217895	0.179577	0.148031	0.0678507	0.205073	0.060428	0.0467086	0.109172	0.259132
	120.939	0.054512	0.209556	0.0957487	0.114075	0.0793601	0.161688	0.140895	0.14831	0.0123376	0.0833171	0.0832015	0.11537	0.127544	0.0819612	0.037458	0.0432496	0.164274	0.0887357	0.0972364	0.0781347	0.0420388	0.0656403	0.108449	0.0365124	0.0849065	0.217168	0.13844	0.0967822	0.111882	0.0884255	0.13765	0.119986	0.0255177	0.0488001	0.157943	0.132359	0.0513503	0.0821495	0.0234487	0.0232202	0.177783	0.148282	0.0700791	0.204309	0.0589839	0.0426734	0.10372	0.256124
	121.331	0.059487	0.206794	0.0978053	0.111321	0.0769055	0.158379	0.13886	0.145498	0.0125461	0.0844609	0.0779331	0.114692	0.123531	0.085183	0.0339205	0.0416381	0.161392	0.0904213	0.0939317	0.0764289	0.0416603	0.063254	0.106299	0.0375559	0.0815654	0.215351	0.136766	0.0955827	0.109091	0.0881806	0.137073	0.118273	0.0233983	0.0478936	0.158066	0.12879	0.0508183	0.082974	0.0228347	0.0247137	0.175858	0.148651	0.0722599	0.203578	0.0576052	0.0385983	0.098388	0.253104
	121.722	0.0645648	0.204122	0.099759	0.108669	0.0747709	0.154916	0.1369	0.142826	0.0135053	0.0854208	0.0723796	0.112851	0.119581	0.088033	0.0305141	0.0401017	0.158183	0.0916843	0.090605	0.0747073	0.0413816	0.0609197	0.104168	0.0386809	0.0783271	0.213477	0.135098	0.0944249	0.106338	0.0880389	0.136396	0.116673	0.0210989	0.047067	0.158044	0.125297	0.0502801	0.083604	0.0221962	0.0262384	0.173755	0.149068	0.074351	0.202852	0.0562823	0.0344869	0.0931814	0.250076
	122.114	0.0696676	0.20156	0.101562	0.10613	0.0729827	0.151317	0.135004	0.140308	0.0149718	0.0861867	0.066592	0.109881	0.115733	0.0905321	0.0272502	0.0386574	0.154635	0.0925271	0.0872534	0.0729578	0.0411843	0.0586434	0.102055	0.0398819	0.0751977	0.211564	0.133433	0.0932987	0.103627	0.0879767	0.135618	0.115188	0.0186454	0.0463267	0.157879	0.121888	0.049726	0.0840438	0.021535	0.0277777	0.17151	0.149565	0.0763171	0.202149	0.0550136	0.0303597	0.0881074	0.247046
	122.505	0.0747344	0.199127	0.103191	0.103723	0.071555	0.147607	0.133158	0.137969	0.0167233	0.0867554	0.0606224	0.105843	0.112028	0.0926634	0.0241388	0.0373045	0.150726	0.0929346	0.0838942	0.0711586	0.0410569	0.0564284	0.099946	0.0411448	0.0721796	0.209588	0.131768	0.0921881	0.100953	0.0879516	0.134732	0.1138	0.0160356	0.0456819	0.157573	0.118566	0.0491491	0.0842911	0.0208429	0.0293191	0.169072	0.150084	0.0781354	0.201477	0.053783	0.0262661	0.0831642	0.244005
	122.896	0.0797289	0.196857	0.104602	0.10147	0.0704965	0.143816	0.131338	0.13583	0.0186011	0.0871048	0.0545177	0.100802	0.108504	0.0944467	0.0211866	0.0360575	0.146518	0.0929167	0.0805398	0.0693046	0.0409747	0.0542735	0.0978486	0.0424626	0.0692749	0.207568	0.130095	0.0910838	0.0983305	0.0879424	0.133735	0.112496	0.013293	0.0451431	0.157129	0.11534	0.0485512	0.0843566	0.020123	0.030834	0.166458	0.150629	0.0797891	0.20085	0.0525958	0.0223064	0.0783614	0.240959
	123.288	0.0846322	0.194788	0.105779	0.0993975	0.0698326	0.139992	0.129555	0.133916	0.0204957	0.0872269	0.0483243	0.094847	0.105211	0.0958784	0.0184	0.0349216	0.142011	0.0924729	0.0772029	0.0673878	0.0409244	0.0521873	0.0957525	0.0438227	0.0664863	0.205491	0.128399	0.0899753	0.0957536	0.0879164	0.132618	0.111271	0.0104399	0.044721	0.156549	0.112212	0.0479211	0.0842353	0.0193711	0.032324	0.16365	0.151193	0.0812666	0.200304	0.0514388	0.0186357	0.0736966	0.237898
	123.679	0.0894381	0.192976	0.106699	0.0975352	0.0695339	0.136167	0.127787	0.132237	0.0223313	0.0871087	0.0420922	0.0880474	0.102187	0.0969465	0.0157856	0.0338986	0.137278	0.0916195	0.0739133	0.0654157	0.0408837	0.0501656	0.093665	0.0452071	0.063815	0.203363	0.126672	0.0888544	0.0932383	0.0878624	0.131379	0.110101	0.00752399	0.0444195	0.155829	0.109192	0.0472675	0.0839384	0.0185924	0.0337576	0.160626	0.151733	0.0825597	0.199835	0.0503147	0.0155155	0.0691805	0.234824
	124.07	0.094146	0.191478	0.107351	0.0959046	0.06959	0.132383	0.126057	0.130794	0.0240482	0.0867471	0.0358905	0.080478	0.0994795	0.0976598	0.0133532	0.0329989	0.132338	0.0903817	0.0706799	0.0634029	0.0408346	0.0482176	0.0915873	0.0466033	0.0612653	0.201192	0.124902	0.0877183	0.0907868	0.0877745	0.130018	0.108991	0.00472343	0.044238	0.154966	0.106286	0.0465803	0.0834672	0.0177935	0.0351353	0.157415	0.152285	0.0836569	0.199472	0.0492194	0.0133186	0.0648172	0.231738
	124.462	0.0987453	0.190352	0.107744	0.0945249	0.0699364	0.128659	0.124361	0.129573	0.0255987	0.0861547	0.0298358	0.0721943	0.097121	0.0979853	0.011121	0.0322118	0.127203	0.0887779	0.0675376	0.061364	0.0407651	0.0463419	0.0895193	0.0479881	0.0588392	0.198966	0.12309	0.0865605	0.0884065	0.0876504	0.128533	0.107921	0.00285258	0.0441669	0.15395	0.103503	0.0458655	0.0828278	0.0169829	0.0364363	0.153972	0.152781	0.0845482	0.199189	0.0481459	0.012443	0.0606158	0.228642
	124.853	0.103215	0.189648	0.107873	0.0934006	0.0705045	0.125014	0.122702	0.128548	0.0269434	0.0853417	0.0241499	0.0632437	0.0951406	0.0979445	0.00912084	0.031543	0.121891	0.0868492	0.0644951	0.0593255	0.0406569	0.044542	0.0874726	0.0493516	0.0565404	0.196707	0.121239	0.0853821	0.0861079	0.0875054	0.126934	0.106897	0.00397585	0.0441905	0.152774	0.100849	0.0451199	0.0820328	0.0161791	0.0376467	0.150351	0.153255	0.0852177	0.198975	0.0470986	0.0130047	0.0565893	0.225548
	125.245	0.107508	0.18939	0.107763	0.0925251	0.0712272	0.121456	0.12109	0.127686	0.0280516	0.0843428	0.0192843	0.0536829	0.0935558	0.0975231	0.00741049	0.0309788	0.116341	0.0846143	0.0615757	0.0572989	0.0405081	0.042822	0.0854392	0.0506779	0.0543708	0.194393	0.119358	0.0841785	0.083885	0.0873375	0.125225	0.105911	0.00680281	0.0442903	0.151428	0.0983269	0.0443395	0.0810833	0.0153945	0.0387637	0.146522	0.153657	0.0856508	0.198798	0.0460627	0.0146673	0.0527443	0.222457
	125.636	0.111565	0.189583	0.107414	0.0918794	0.0720099	0.117979	0.119498	0.12695	0.0289048	0.0831809	0.0161038	0.0435727	0.0923656	0.0967534	0.00608424	0.0305112	0.110561	0.0821074	0.058792	0.0553035	0.0403085	0.0411772	0.0834319	0.0519621	0.0523296	0.19204	0.117463	0.0829485	0.0817496	0.0871607	0.123419	0.104958	0.00997307	0.0444452	0.149906	0.0959412	0.0435292	0.0799983	0.0146554	0.03976	0.142524	0.153973	0.0858339	0.198602	0.0450439	0.0169651	0.0490993	0.219386
	126.027	0.11531	0.190189	0.106847	0.0914306	0.0728123	0.114594	0.117932	0.126312	0.0294947	0.0818927	0.0157027	0.0330456	0.0915651	0.0956722	0.00526808	0.0301328	0.104482	0.0793488	0.056147	0.0533431	0.0400599	0.0396145	0.0814414	0.0532041	0.0504155	0.189634	0.115569	0.0816892	0.0796874	0.0869648	0.121523	0.104045	0.0132128	0.04464	0.14821	0.0936839	0.0426772	0.0787797	0.013978	0.0406441	0.138374	0.154204	0.0857559	0.198368	0.0440314	0.0195627	0.0456606	0.216334
	126.419	0.118664	0.191142	0.106064	0.0911434	0.0735678	0.111296	0.116352	0.12575	0.0298263	0.080506	0.0182134	0.0223852	0.0911225	0.0943178	0.0050457	0.0298219	0.0981115	0.0763535	0.0536586	0.0514199	0.0397636	0.038125	0.0794716	0.0544031	0.048621	0.187166	0.113692	0.0803943	0.0777023	0.0867416	0.119544	0.10315	0.0164349	0.0448616	0.146341	0.0915523	0.0417926	0.0774429	0.0133881	0.0413902	0.134067	0.154285	0.0854154	0.198032	0.0430262	0.0222754	0.0424464	0.213308
	126.81	0.121564	0.19234	0.105061	0.090974	0.0742631	0.108105	0.114743	0.125254	0.0299129	0.0790421	0.0225818	0.0127119	0.0910083	0.0927745	0.00534473	0.0295763	0.091452	0.073147	0.0513162	0.0495358	0.0394193	0.0367118	0.0775209	0.0555708	0.0469393	0.184644	0.111839	0.0790617	0.0757832	0.0864738	0.117491	0.102282	0.0195833	0.0451056	0.14431	0.0895325	0.0408652	0.0759966	0.012904	0.0420032	0.129662	0.154253	0.0848147	0.197592	0.0420319	0.0250237	0.0394666	0.210307
	127.202	0.123963	0.193661	0.103844	0.0908874	0.0748874	0.105037	0.113086	0.124826	0.0297739	0.0775265	0.0278125	0.0100675	0.0911716	0.0910823	0.0059705	0.0293714	0.0845266	0.0697357	0.0491384	0.047685	0.0390362	0.0353693	0.0755816	0.0567065	0.0453579	0.182037	0.110015	0.0776829	0.0739221	0.0861309	0.115363	0.101416	0.0226444	0.045372	0.142126	0.0876119	0.0399021	0.0744457	0.012542	0.0424751	0.125126	0.154038	0.0839682	0.197021	0.0410454	0.0277619	0.0367362	0.207321
	127.593	0.125844	0.194977	0.102394	0.0908514	0.0754334	0.10212	0.111351	0.12447	0.0294306	0.0759649	0.0333614	0.0184002	0.0915631	0.0893369	0.00674181	0.0291997	0.0774333	0.0661529	0.0471169	0.0458782	0.0386112	0.0340927	0.0736631	0.0578204	0.0438652	0.179366	0.108217	0.0762564	0.0721201	0.0856979	0.113165	0.100547	0.0255829	0.0456637	0.139805	0.0857773	0.038905	0.0728065	0.012316	0.0427964	0.120523	0.153671	0.082893	0.196323	0.0400844	0.0304707	0.0342709	0.204349
	127.984	0.127221	0.196158	0.100721	0.0908455	0.075929	0.0993928	0.109549	0.124195	0.028899	0.0743798	0.0389583	0.0296553	0.0921299	0.0875793	0.00754577	0.0290456	0.0702221	0.0624204	0.0452632	0.0441189	0.0381539	0.0328835	0.0717534	0.0589086	0.0424484	0.176603	0.106433	0.0747774	0.0703618	0.0851432	0.110891	0.0996604	0.0283977	0.0459863	0.13736	0.0840106	0.0378745	0.0710771	0.0122254	0.0429803	0.11583	0.153127	0.0816105	0.195518	0.0391479	0.0331223	0.0320813	0.201373
	128.376	0.128131	0.197102	0.0988113	0.0908609	0.0763549	0.0968771	0.107657	0.123998	0.0281899	0.0727781	0.0444675	0.0414667	0.0928142	0.0858749	0.00832476	0.0288897	0.0630442	0.0585775	0.0435823	0.0424318	0.0376634	0.0317317	0.0698671	0.0599667	0.0410943	0.173762	0.104654	0.0732457	0.0686585	0.0844646	0.108543	0.0987375	0.0310715	0.0463399	0.134798	0.0823036	0.0368259	0.0692748	0.0122713	0.0430067	0.111078	0.152392	0.0801424	0.194599	0.0382547	0.0356824	0.0301864	0.198392
	128.767	0.128624	0.197735	0.0966826	0.0908933	0.0767347	0.0946101	0.105706	0.123868	0.0273031	0.0711824	0.0498199	0.0533282	0.0935731	0.084269	0.00905147	0.0287282	0.0559898	0.0546743	0.0420724	0.0408401	0.0371441	0.0306432	0.0679991	0.060987	0.0397941	0.170838	0.102863	0.0716636	0.0669982	0.0836537	0.10612	0.0977811	0.0335904	0.0467231	0.132129	0.08064	0.0357552	0.0674014	0.0124341	0.042896	0.106291	0.151504	0.0785033	0.193605	0.0374109	0.0381142	0.0285907	0.195394
	129.159	0.128744	0.198019	0.0943512	0.0909483	0.0770398	0.0925957	0.103698	0.123778	0.026233	0.0696164	0.0549779	0.065051	0.0943539	0.0827791	0.00971545	0.0285352	0.0492245	0.0507512	0.0407501	0.0393765	0.0366024	0.0296098	0.066159	0.0619503	0.0385374	0.167824	0.101055	0.0700325	0.0653905	0.082723	0.103622	0.0967673	0.0359513	0.0471259	0.129353	0.0790158	0.0346816	0.0654678	0.0126995	0.0426334	0.101459	0.150405	0.0767062	0.192508	0.0366218	0.0403684	0.027306	0.192378
	129.55	0.128524	0.197954	0.0918343	0.091023	0.0772578	0.0908436	0.101649	0.123689	0.0249692	0.0681047	0.0599187	0.0765364	0.0951245	0.0814546	0.0103133	0.0283108	0.0429339	0.0468736	0.0395999	0.0380792	0.0360384	0.0286345	0.0643548	0.0628477	0.0373198	0.164743	0.0992209	0.0683602	0.0638343	0.0816958	0.101055	0.0957109	0.0381211	0.0475348	0.126473	0.0774217	0.0336034	0.0634868	0.0130376	0.0422278	0.096653	0.149158	0.0747532	0.191322	0.0358986	0.0424139	0.0263251	0.189347
	129.941	0.127961	0.19756	0.0891771	0.0911131	0.0773701	0.0893362	0.0995879	0.12356	0.0235028	0.0666879	0.0646181	0.0877179	0.0958457	0.0802794	0.0108436	0.0280368	0.0373726	0.043081	0.0386357	0.036976	0.0354652	0.0277163	0.062584	0.0636571	0.0361356	0.161571	0.0973677	0.0666491	0.0623268	0.0805916	0.098425	0.0945991	0.0400976	0.0479327	0.123487	0.0758528	0.0325303	0.061461	0.0134249	0.0416834	0.0918505	0.147707	0.0726447	0.19001	0.0352315	0.0442182	0.0256398	0.186301
	130.333	0.127028	0.196873	0.0863917	0.0911991	0.0773332	0.0880448	0.0975038	0.123344	0.0218327	0.0653888	0.0690474	0.098561	0.0964889	0.0792968	0.0113057	0.0277075	0.0329739	0.0394265	0.0378349	0.0361031	0.0348837	0.0268499	0.0608634	0.0643727	0.0349816	0.158336	0.0955039	0.0649065	0.0608762	0.0794505	0.095745	0.093442	0.0418439	0.0483007	0.120395	0.0743065	0.0314685	0.0594114	0.0138344	0.0409904	0.0871362	0.146078	0.0703787	0.188535	0.0346291	0.0457769	0.0252265	0.183254
	130.724	0.125668	0.195912	0.0835247	0.0912499	0.0771541	0.0869397	0.0954285	0.123008	0.0199668	0.0642477	0.0731675	0.109014	0.0970286	0.0784866	0.011697	0.0273221	0.0302309	0.035953	0.0371922	0.0354717	0.0343079	0.0260404	0.0591812	0.0649843	0.0338551	0.155015	0.0936437	0.063135	0.0594656	0.0782878	0.0930242	0.0922463	0.0433471	0.0486248	0.117204	0.0727723	0.0304131	0.0573379	0.0142408	0.0401717	0.0825178	0.144266	0.0679536	0.186878	0.03408	0.0470998	0.0250533	0.180204
	131.115	0.123811	0.194677	0.0805811	0.0912269	0.0767927	0.0859677	0.0933355	0.122529	0.017928	0.0632794	0.0769331	0.119036	0.0974321	0.077869	0.0120155	0.0268671	0.0296858	0.032693	0.0366867	0.0350969	0.0337439	0.0252759	0.0575506	0.0654909	0.0327505	0.151619	0.0918063	0.0613365	0.0581034	0.0771348	0.0902769	0.0910041	0.0445894	0.0488931	0.11392	0.071249	0.0293779	0.0552581	0.0146291	0.0392102	0.0780493	0.142234	0.0653767	0.184978	0.033584	0.0482163	0.0250855	0.177164
	131.507	0.121397	0.193122	0.0775775	0.0910814	0.0762775	0.0851004	0.091239	0.121901	0.0157497	0.0625017	0.080297	0.128554	0.097681	0.0774431	0.0122592	0.026356	0.0314046	0.0297022	0.0362871	0.0349687	0.0331993	0.0245603	0.0559608	0.0658999	0.0316639	0.148145	0.0900037	0.0595135	0.0567696	0.0759963	0.0875144	0.0897336	0.0455483	0.049103	0.110561	0.0697214	0.0283517	0.0531779	0.0149773	0.0381322	0.0737927	0.140036	0.0626586	0.182845	0.0331426	0.0491782	0.0252771	0.17413
	131.898	0.118385	0.19117	0.0745183	0.0907758	0.075606	0.0842895	0.0891249	0.121132	0.0134766	0.0619156	0.0832161	0.137489	0.09774	0.0771937	0.0124279	0.0257752	0.0350534	0.0270199	0.0359802	0.0350709	0.0326844	0.023883	0.0544113	0.0662121	0.0305863	0.144574	0.0882497	0.0576628	0.0554629	0.0748776	0.0847446	0.0884119	0.0462343	0.0492563	0.107142	0.0681835	0.0273488	0.0511022	0.0152809	0.0369334	0.0697545	0.137604	0.0598223	0.180445	0.0327472	0.0500359	0.0255929	0.171099
	132.29	0.114778	0.188711	0.0713831	0.0902754	0.0748066	0.0835163	0.0869825	0.120233	0.0111586	0.0615044	0.0856612	0.14575	0.0975915	0.0771417	0.0125249	0.0251384	0.0399698	0.02472	0.0357193	0.0353758	0.0321975	0.0232396	0.052902	0.066444	0.0295108	0.140929	0.0865436	0.0557875	0.054175	0.073778	0.0819776	0.08705	0.046629	0.0493609	0.103686	0.0666217	0.0263671	0.0490454	0.0155237	0.0356264	0.0660342	0.135008	0.0568933	0.177812	0.0324099	0.0508567	0.0259872	0.168067
	132.681	0.11062	0.185622	0.0681847	0.0895687	0.0739213	0.0827608	0.0848305	0.119218	0.00884595	0.0612545	0.087618	0.153236	0.0972092	0.0772379	0.0125554	0.0244438	0.0456333	0.0228756	0.035498	0.0358402	0.0317474	0.022628	0.0514182	0.0665937	0.0284285	0.137176	0.0848814	0.0538852	0.0528923	0.0726808	0.0792133	0.0856275	0.0467588	0.0494281	0.100213	0.0650248	0.0254134	0.047002	0.015703	0.0342315	0.062612	0.132216	0.0539016	0.174971	0.0321195	0.0516872	0.0264295	0.165018
	133.072	0.106	0.181803	0.0648925	0.0886601	0.072956	0.0820114	0.0826473	0.11809	0.00659302	0.0611219	0.0890939	0.159877	0.0965754	0.0775018	0.012529	0.0236929	0.0516126	0.0215475	0.0352774	0.0364293	0.0313258	0.0220361	0.049972	0.0666698	0.0273316	0.133348	0.0832487	0.0519603	0.051624	0.0715901	0.0764575	0.0841354	0.0466248	0.0494666	0.096742	0.0633876	0.0245024	0.0449886	0.0158091	0.0327432	0.0595795	0.129256	0.0508766	0.171953	0.0318811	0.0525751	0.0268832	0.161949
	133.464	0.101036	0.177184	0.0615312	0.0875701	0.0719691	0.0812752	0.0804769	0.116841	0.00447338	0.0610818	0.0901126	0.165598	0.0956841	0.0778648	0.0124555	0.0229001	0.0576461	0.0207855	0.0350516	0.0370907	0.0309335	0.0214696	0.048545	0.0666652	0.0262162	0.129424	0.0816248	0.0500169	0.0503527	0.0704881	0.0737075	0.082573	0.046245	0.049485	0.0932895	0.0616987	0.0236306	0.0430005	0.0158332	0.0311986	0.0569282	0.12617	0.0478393	0.16883	0.0316855	0.0535437	0.0273213	0.158841
	133.855	0.0958532	0.171762	0.0580984	0.086335	0.0709386	0.0805358	0.0783107	0.11545	0.00270681	0.0610857	0.0907112	0.170378	0.0945237	0.0783065	0.0123459	0.0220547	0.0635863	0.0205565	0.0348101	0.0377939	0.0305623	0.0209165	0.0471513	0.0665697	0.0250785	0.125425	0.079992	0.0480612	0.049095	0.0693895	0.0709654	0.0809165	0.0456424	0.0494824	0.0898629	0.0599635	0.0228207	0.0410475	0.0157713	0.0295871	0.0546951	0.122926	0.0448076	0.16561	0.031517	0.0546011	0.0277192	0.155696
	134.247	0.0905651	0.165593	0.0546215	0.084984	0.0698948	0.0798007	0.0761875	0.113882	0.0021847	0.0611043	0.0909323	0.174209	0.0931087	0.0787591	0.0122092	0.0211804	0.0693111	0.0207849	0.0345404	0.0384993	0.0302027	0.0203819	0.0457832	0.0663744	0.0239222	0.121364	0.0783276	0.0461045	0.047842	0.0682954	0.0682331	0.0791857	0.0448134	0.0494546	0.0864696	0.0581777	0.0220651	0.0391361	0.0156085	0.0279414	0.0529039	0.119617	0.0417861	0.162358	0.0313695	0.0557451	0.0280521	0.152508
	134.638	0.0852369	0.158797	0.0511447	0.0835468	0.0688053	0.0790379	0.0741262	0.112104	0.00344745	0.0611079	0.0908126	0.177116	0.0914406	0.0791405	0.0120508	0.0202671	0.0748347	0.0213475	0.0342609	0.0391875	0.0298513	0.0198629	0.0444439	0.0660556	0.0227506	0.117234	0.0766235	0.0441543	0.0466002	0.067227	0.065512	0.0773629	0.0437887	0.0493892	0.0831082	0.0563516	0.0213753	0.0372644	0.0153459	0.026266	0.051515	0.116187	0.038777	0.159062	0.0312131	0.0569509	0.0283071	0.14928
	135.029	0.0798873	0.151539	0.0476827	0.0820266	0.0676458	0.0782242	0.0721315	0.110085	0.00533393	0.0610686	0.0903795	0.17915	0.089541	0.0794029	0.0118729	0.0193334	0.0800881	0.0220981	0.0339507	0.0398449	0.029493	0.0193551	0.0431419	0.0656089	0.0215722	0.113077	0.0748719	0.0422243	0.0453755	0.0662096	0.0628122	0.075471	0.0425526	0.0492704	0.0797804	0.0544918	0.0207487	0.0354499	0.014971	0.0245723	0.0505712	0.11271	0.0357784	0.155738	0.0310421	0.0582042	0.0284642	0.146025
	135.421	0.0744716	0.143992	0.0443039	0.0804107	0.0664011	0.0773155	0.0702407	0.10781	0.00737334	0.0609827	0.089641	0.180348	0.0874257	0.0794247	0.0116727	0.0183846	0.0851124	0.0229345	0.0336336	0.04046	0.0291287	0.0188648	0.0418641	0.0650152	0.0203961	0.108868	0.0730798	0.0403218	0.0441549	0.0652589	0.0601378	0.0735156	0.0411248	0.0490828	0.076485	0.0526054	0.0201741	0.0336841	0.0144883	0.0228897	0.049974	0.10917	0.0327889	0.152374	0.0308344	0.059472	0.0285195	0.142743
	135.812	0.0689048	0.136317	0.0410017	0.0786653	0.0650064	0.0762538	0.06842	0.105281	0.00944938	0.0608256	0.0885902	0.180765	0.0851069	0.0791885	0.0114458	0.0174236	0.0898421	0.0237561	0.0332866	0.0410389	0.0287459	0.0183785	0.0406279	0.0642788	0.01923	0.104648	0.0712592	0.0384564	0.0429528	0.0644097	0.0575036	0.0715018	0.0395025	0.0488104	0.0732252	0.0507063	0.0196578	0.0319834	0.0138986	0.0212108	0.0497507	0.105569	0.0298174	0.148936	0.0305817	0.0607433	0.0284625	0.139455
	136.203	0.0630908	0.128602	0.0378182	0.0767406	0.0634785	0.0750031	0.0666973	0.102518	0.0115047	0.0606037	0.0872062	0.180412	0.0826072	0.0785963	0.0111862	0.0164755	0.0942265	0.0245154	0.0329083	0.0415674	0.0283447	0.0179028	0.0394105	0.0634016	0.0180834	0.100401	0.0694252	0.0366344	0.0417446	0.0636603	0.0549173	0.0694567	0.0376874	0.0484466	0.0700091	0.0487941	0.0191754	0.0303441	0.0132079	0.0195818	0.0497951	0.101963	0.0268763	0.145442	0.0302842	0.062003	0.0282941	0.136158
	136.595	0.0569395	0.12087	0.0347349	0.0745956	0.0617579	0.0735028	0.0650245	0.0995584	0.013484	0.0602936	0.0854631	0.179298	0.0799251	0.0776539	0.0108894	0.0155287	0.0981926	0.025187	0.0324856	0.042048	0.0279209	0.0174242	0.0382224	0.062394	0.0169595	0.0961366	0.0675986	0.0348586	0.0405394	0.0630284	0.0523906	0.0673619	0.0357073	0.047988	0.0668462	0.0468821	0.0187358	0.0287686	0.0124338	0.017996	0.0500869	0.0982907	0.0239942	0.141847	0.0299305	0.0632528	0.0280156	0.132862
	136.986	0.0504227	0.113051	0.031729	0.0721899	0.0598829	0.0717461	0.0633931	0.0964365	0.0153322	0.0598848	0.0833417	0.177404	0.0770789	0.0763493	0.0105538	0.0146162	0.10158	0.0257459	0.0319826	0.0424548	0.0274687	0.0169395	0.037047	0.0612796	0.0158633	0.0918692	0.0657871	0.0331341	0.039321	0.0624904	0.0499328	0.0652435	0.0335575	0.0474416	0.0637543	0.0449663	0.0183236	0.0272646	0.0115828	0.0164969	0.0505676	0.0946516	0.0212044	0.138202	0.0295357	0.0645071	0.0276285	0.129562
	137.378	0.0435606	0.105013	0.0287951	0.0695185	0.0578461	0.0697148	0.0617758	0.0931917	0.0169961	0.059354	0.0808342	0.174695	0.0740652	0.0746894	0.0101816	0.0137248	0.104336	0.0262041	0.0314047	0.0427664	0.0269909	0.016446	0.0358751	0.0600668	0.0147947	0.0875716	0.0640004	0.0314592	0.0380827	0.0620264	0.0475462	0.0630761	0.0312899	0.0468193	0.0607481	0.0430526	0.0179385	0.025819	0.0106824	0.0151	0.0511554	0.090988	0.0185507	0.134505	0.0290886	0.0657775	0.0271425	0.12625
	137.769	0.036467	0.096604	0.0258572	0.0665961	0.0556762	0.0674335	0.0601231	0.0898415	0.0184302	0.0586613	0.0779571	0.171155	0.0708927	0.0727564	0.00978	0.0128752	0.10629	0.0265353	0.0307056	0.04295	0.0264752	0.0159299	0.0347084	0.0587839	0.013755	0.0832891	0.0622279	0.0298387	0.0368313	0.0615982	0.0452376	0.0608613	0.0289148	0.0461361	0.0578463	0.0411417	0.0175871	0.0244464	0.00974232	0.01383	0.0518578	0.0873721	0.0160836	0.130813	0.0285968	0.0670934	0.0265575	0.122921
	138.161	0.0293234	0.0876756	0.0229434	0.0634693	0.0534323	0.064944	0.0584464	0.086391	0.0196072	0.0577886	0.0747476	0.16676	0.0675744	0.0705353	0.00935822	0.0120676	0.10744	0.0267368	0.0299045	0.0429625	0.0259242	0.0154001	0.0335208	0.0574302	0.0127459	0.0789817	0.0604548	0.028272	0.0355466	0.0611496	0.0429999	0.0585923	0.026481	0.0454092	0.0550611	0.0392321	0.0172543	0.0231305	0.00878871	0.0127302	0.0525504	0.0838171	0.0138567	0.127184	0.0280545	0.0684564	0.0258845	0.119557
	138.552	0.0223815	0.0781705	0.0199834	0.0602087	0.0511051	0.0622804	0.0566811	0.0828279	0.0205161	0.056685	0.0712662	0.161546	0.0641141	0.0681352	0.00892786	0.0112949	0.107741	0.0267867	0.0289849	0.0427816	0.0253248	0.0148426	0.0323301	0.0560157	0.0117692	0.0747	0.0586566	0.0267636	0.0342533	0.0606449	0.0408342	0.0562437	0.0240266	0.0446482	0.0524009	0.0373351	0.0169588	0.02188	0.00784037	0.0118012	0.0532698	0.0803163	0.0119386	0.123645	0.0274481	0.0698736	0.0251235	0.116157
	138.943	0.0159943	0.0680968	0.017028	0.0568813	0.0487829	0.0595135	0.0548627	0.0791256	0.02117	0.0553462	0.0675879	0.155552	0.0605467	0.0655144	0.00849821	0.0105763	0.107235	0.026652	0.0279623	0.0423683	0.0246728	0.014268	0.0311102	0.0545324	0.0108331	0.0704315	0.0568014	0.0253175	0.0329329	0.0600182	0.038731	0.0538385	0.0215729	0.0438601	0.0498679	0.0354479	0.0166779	0.0206908	0.00692052	0.0110959	0.053901	0.0769622	0.0104027	0.12028	0.0267797	0.0713112	0.0242803	0.112709
	139.335	0.0105661	0.0576068	0.0140816	0.0535603	0.0464163	0.0566533	0.0529526	0.0752664	0.0215976	0.0537476	0.0637907	0.148878	0.0568835	0.0627057	0.00807512	0.00987777	0.106051	0.0263333	0.0268704	0.0417256	0.0239622	0.0136748	0.0298794	0.0529633	0.00994386	0.0661967	0.0548677	0.0239371	0.0316058	0.0592516	0.036685	0.0513483	0.0191767	0.0430391	0.0474546	0.0335897	0.0164182	0.0195564	0.00606839	0.0105892	0.054445	0.0736795	0.00933839	0.117068	0.0260242	0.07272	0.023359	0.109217
	139.378	0.00682882	0.0469523	0.0111756	0.0502746	0.0440532	0.0537357	0.050972	0.0712337	0.0218393	0.0519001	0.0599477	0.141642	0.053167	0.0596698	0.00765833	0.00922836	0.104232	0.0257981	0.0257045	0.0408484	0.0231827	0.0130633	0.0286319	0.0513029	0.00911494	0.0620346	0.0528297	0.0226296	0.0302717	0.0583053	0.0346923	0.0488107	0.0168316	0.0421738	0.0451517	0.0317638	0.0161659	0.0184889	0.00531974	0.0103085	0.0548556	0.0705788	0.00880932	0.114056	0.0251901	0.0740269	0.0223605	0.105687
Figure 8-figure supplement 1A (F3)	Distance (nm)	ACF1	ACF2	ACF3	ACF4	ACF5	ACF6	ACF7	ACF8	ACF9	ACF10	ACF11	ACF12	ACF13	ACF14	ACF15	ACF16	ACF17	ACF18	ACF19	ACF20	ACF21	ACF22	ACF23	ACF24	ACF25	ACF26	ACF27	ACF28	ACF29	ACF30	ACF31	ACF32	ACF33	ACF34	ACF35	ACF36	ACF37	ACF38	ACF39	ACF40	ACF41	ACF42	ACF43	ACF44	ACF45	ACF46	ACF47	ACF48
	0	1.00002	1.00004	1.00002	1	1	1.00006	1.00005	1.00001	1.00002	1.00011	1.00006	1.00007	1.0001	1.00007	1	1.00007	1	1.00007	1.00002	1	1	1	1.00002	1	1	1	1.00001	1.00001	1.00006	1.00006	1.00007	1	1.00004	1.00014	1.00011	1.00008	1.00005	1.00007	1.00008	1.00006	1.00003	1.00002	1.00014	1.00006	1.00007	1.00003	1.00012	1.00004
	0.391389	0.999258	0.998687	0.998788	0.998536	0.996669	0.996252	0.99815	0.997445	0.997533	0.997561	0.996347	0.99898	0.99783	0.997666	0.996212	0.997475	0.998464	0.997543	0.998787	0.997553	0.997511	0.996682	0.998902	0.999225	0.996802	0.997916	0.998561	0.997883	0.99614	0.998816	0.997836	0.996934	0.998405	0.99793	0.997235	0.998352	0.998128	0.996638	0.997966	0.996295	0.998557	0.997942	0.996769	0.997558	0.997615	0.996993	0.99844	0.998534
	0.782779	0.997033	0.994887	0.995563	0.995295	0.990916	0.989766	0.994234	0.993444	0.993139	0.991333	0.989661	0.995887	0.992019	0.993032	0.990201	0.992592	0.99536	0.992369	0.996109	0.991944	0.99289	0.99055	0.99575	0.997016	0.991269	0.993406	0.995017	0.993203	0.988789	0.995745	0.992592	0.992001	0.994887	0.992661	0.990739	0.993895	0.993637	0.9901	0.992827	0.989593	0.994482	0.992984	0.988635	0.991349	0.991673	0.988395	0.993824	0.995383
	1.17417	0.993464	0.98886	0.990593	0.990626	0.983985	0.982086	0.988932	0.988953	0.987694	0.982261	0.981408	0.991066	0.983326	0.987018	0.983389	0.986439	0.991145	0.985458	0.9923	0.984011	0.987045	0.98282	0.99078	0.993507	0.984622	0.987003	0.989626	0.986522	0.979386	0.99118	0.985099	0.986392	0.989983	0.985078	0.981531	0.987198	0.987102	0.981709	0.985228	0.981401	0.988066	0.985807	0.976955	0.982192	0.982967	0.975067	0.986786	0.991059
	1.56556	0.98866	0.980723	0.983839	0.984097	0.974301	0.971483	0.981731	0.982547	0.980114	0.97042	0.970147	0.984758	0.971884	0.978927	0.973632	0.978141	0.9853	0.976165	0.987055	0.973549	0.979002	0.972241	0.984112	0.988793	0.975426	0.978167	0.982146	0.977234	0.966582	0.985117	0.975329	0.978588	0.983368	0.975199	0.969251	0.97836	0.978245	0.970389	0.975064	0.970204	0.979416	0.976386	0.961799	0.970162	0.971463	0.95774	0.977713	0.985197
	1.95695	0.982736	0.970687	0.975567	0.976112	0.963291	0.959639	0.973316	0.975373	0.971406	0.956647	0.957432	0.977216	0.958332	0.969712	0.962587	0.96881	0.978348	0.965446	0.980738	0.961406	0.969762	0.960178	0.975958	0.983024	0.965072	0.967533	0.972879	0.965956	0.951947	0.977903	0.964048	0.969974	0.975589	0.963763	0.954865	0.967845	0.967628	0.957513	0.962936	0.957613	0.968803	0.965396	0.944357	0.956002	0.957889	0.937155	0.967071	0.978346
	2.34834	0.975803	0.95889	0.965827	0.966488	0.950206	0.945778	0.963507	0.966716	0.961053	0.94121	0.942646	0.968672	0.942928	0.959072	0.949222	0.958126	0.970063	0.953084	0.973227	0.94765	0.95889	0.946095	0.966468	0.97633	0.952904	0.954893	0.961759	0.952468	0.934934	0.969617	0.951418	0.959804	0.966552	0.950949	0.938384	0.955834	0.955199	0.942655	0.948933	0.942981	0.956382	0.952982	0.924983	0.939951	0.942393	0.914008	0.955249	0.970392
	2.73973	0.967959	0.945497	0.954796	0.955415	0.935654	0.930616	0.952624	0.957045	0.94951	0.924663	0.926483	0.959331	0.926122	0.947535	0.934133	0.946597	0.960693	0.939551	0.9647	0.932782	0.946839	0.930653	0.955831	0.968863	0.939543	0.940578	0.94894	0.937029	0.916309	0.960485	0.937916	0.948688	0.956561	0.937239	0.920329	0.942662	0.941275	0.926483	0.933438	0.927034	0.942345	0.93959	0.904414	0.922518	0.92545	0.888935	0.94265	0.961656
	3.13111	0.959279	0.930632	0.942582	0.942959	0.919697	0.914286	0.940776	0.946366	0.936829	0.907338	0.909108	0.949341	0.908212	0.935195	0.917383	0.934376	0.950304	0.925012	0.955208	0.917053	0.933695	0.914013	0.944198	0.960765	0.925087	0.924695	0.934513	0.919769	0.896289	0.950629	0.923797	0.936661	0.94573	0.92289	0.900968	0.928537	0.925993	0.909175	0.916678	0.909956	0.926836	0.925465	0.883088	0.904025	0.907327	0.86244	0.92959	0.952257
	3.52251	0.949812	0.914381	0.929254	0.929136	0.902216	0.896655	0.927936	0.934579	0.922979	0.889401	0.890448	0.938787	0.889388	0.92214	0.898727	0.921392	0.938908	0.909475	0.94476	0.900559	0.919417	0.896199	0.931701	0.952167	0.909467	0.907291	0.918511	0.900658	0.87491	0.940115	0.909165	0.923646	0.934118	0.908041	0.880352	0.913607	0.909409	0.890731	0.898788	0.891694	0.909926	0.910756	0.861148	0.884679	0.888188	0.834867	0.916311	0.942282
	3.91389	0.939586	0.896821	0.91492	0.914151	0.883694	0.878299	0.914316	0.922107	0.908334	0.871067	0.871042	0.927692	0.869873	0.908675	0.87881	0.907964	0.926729	0.893249	0.93349	0.88353	0.904353	0.877734	0.918462	0.943196	0.893171	0.888632	0.901095	0.879976	0.852771	0.929037	0.894195	0.910116	0.921925	0.892873	0.858764	0.898027	0.89172	0.8716	0.880007	0.872835	0.891694	0.895671	0.838836	0.864746	0.868275	0.806414	0.902987	0.931958
	4.30528	0.928607	0.877975	0.899581	0.897968	0.863717	0.858748	0.899732	0.908639	0.892665	0.852223	0.850498	0.916019	0.849671	0.894637	0.857139	0.893752	0.913689	0.876122	0.921332	0.865799	0.888251	0.858362	0.904563	0.93396	0.875839	0.868642	0.882262	0.857615	0.8296	0.917348	0.878731	0.895706	0.909083	0.87727	0.836008	0.881796	0.872841	0.851463	0.860328	0.853015	0.872134	0.880146	0.815894	0.844221	0.847543	0.777137	0.889691	0.921248
	4.69667	0.916877	0.857878	0.883314	0.8808	0.842735	0.83851	0.884329	0.894624	0.87636	0.832913	0.829285	0.903705	0.828904	0.880325	0.834322	0.878959	0.900013	0.858333	0.90841	0.847454	0.871426	0.838588	0.890097	0.924568	0.857923	0.847579	0.862166	0.833808	0.805968	0.90508	0.862795	0.880898	0.895762	0.861275	0.812231	0.864991	0.85292	0.830691	0.839932	0.832764	0.851271	0.864282	0.792301	0.823257	0.826138	0.747022	0.876472	0.910365
	5.08806	0.904399	0.836539	0.866121	0.862669	0.820477	0.817299	0.867979	0.879888	0.859289	0.812983	0.807161	0.89067	0.807562	0.865574	0.810139	0.863338	0.885682	0.839738	0.894686	0.828307	0.853713	0.818266	0.875135	0.915113	0.839188	0.825417	0.840853	0.808555	0.78174	0.892169	0.846192	0.865448	0.881913	0.844719	0.787293	0.847574	0.831898	0.809048	0.818832	0.811882	0.82911	0.847978	0.767776	0.801823	0.803995	0.716024	0.863326	0.89928
	5.47945	0.891189	0.813987	0.848052	0.843715	0.797098	0.795288	0.850702	0.864646	0.841657	0.792396	0.784301	0.876851	0.785727	0.850552	0.784801	0.846885	0.87083	0.820425	0.880225	0.808323	0.835234	0.797661	0.859771	0.905699	0.819813	0.802317	0.818429	0.781957	0.75724	0.878608	0.828847	0.849576	0.867627	0.827559	0.761218	0.829581	0.809843	0.786663	0.797161	0.7906	0.805682	0.831253	0.742186	0.780008	0.781191	0.684141	0.850266	0.888126
	5.87084	0.877282	0.790271	0.82916	0.824064	0.772675	0.772607	0.832536	0.849009	0.823573	0.771155	0.760834	0.862214	0.763513	0.835263	0.758522	0.82963	0.85556	0.800478	0.865071	0.787475	0.816058	0.776928	0.844107	0.896426	0.799888	0.778401	0.795024	0.75418	0.732698	0.864392	0.810709	0.833357	0.85297	0.809748	0.734099	0.811043	0.786822	0.763599	0.775067	0.769095	0.781062	0.814116	0.715516	0.757908	0.757793	0.651448	0.837317	0.876973
	6.26223	0.862732	0.76545	0.809497	0.80378	0.747094	0.749149	0.81343	0.832939	0.805054	0.749273	0.736695	0.846766	0.74105	0.819738	0.731153	0.811453	0.839915	0.779893	0.849242	0.765711	0.796134	0.756107	0.828264	0.887398	0.779341	0.753747	0.770715	0.72524	0.708213	0.849523	0.791723	0.816738	0.837978	0.791259	0.70595	0.792015	0.762874	0.739801	0.752693	0.747342	0.755337	0.796588	0.687727	0.735636	0.733889	0.618127	0.824539	0.865877
	6.65362	0.847614	0.739622	0.789173	0.783056	0.720691	0.725351	0.793554	0.816745	0.786396	0.726956	0.712297	0.830559	0.718599	0.804172	0.703155	0.792604	0.824091	0.758947	0.832853	0.743198	0.775715	0.735597	0.812393	0.878729	0.758515	0.728607	0.745682	0.695389	0.684307	0.834081	0.77202	0.800044	0.822823	0.772223	0.677067	0.772636	0.738187	0.715589	0.730325	0.725795	0.728657	0.778825	0.65909	0.713449	0.709716	0.584474	0.812045	0.855004
	7.04501	0.832012	0.712889	0.768262	0.761939	0.693292	0.701069	0.77288	0.800293	0.767548	0.704334	0.687549	0.813678	0.696377	0.788539	0.674306	0.773008	0.808106	0.737661	0.815915	0.719968	0.754719	0.71537	0.796649	0.870526	0.737278	0.70305	0.720017	0.664669	0.661024	0.818109	0.751644	0.783124	0.807546	0.752702	0.647551	0.753015	0.712827	0.690891	0.708162	0.704376	0.701163	0.760908	0.629755	0.691536	0.685432	0.550879	0.799965	0.844381
	7.4364	0.816016	0.685376	0.746898	0.740616	0.665247	0.676755	0.751591	0.783892	0.74883	0.681708	0.662891	0.796229	0.674716	0.773117	0.644994	0.752929	0.792158	0.716349	0.798562	0.696274	0.733418	0.695861	0.781214	0.862904	0.716001	0.677369	0.693895	0.633294	0.638926	0.80173	0.730814	0.766335	0.792353	0.732928	0.617735	0.733357	0.687026	0.66608	0.686547	0.683545	0.673023	0.743074	0.600093	0.670236	0.66137	0.517807	0.788471	0.834199
	7.82779	0.799714	0.657203	0.725176	0.719173	0.636532	0.652444	0.729742	0.767498	0.730263	0.659298	0.638387	0.778324	0.653886	0.757917	0.615202	0.732427	0.776306	0.695129	0.780837	0.672255	0.711827	0.677127	0.766256	0.85596	0.694678	0.6517	0.667444	0.601394	0.618148	0.785028	0.709666	0.749622	0.777327	0.713047	0.587816	0.713821	0.660913	0.641206	0.665737	0.66335	0.644394	0.725468	0.570371	0.649802	0.637765	0.485758	0.777726	0.824503
	8.21918	0.78318	0.628485	0.703206	0.69774	0.607305	0.62837	0.707423	0.75126	0.712048	0.63735	0.614292	0.760062	0.634174	0.743157	0.585056	0.711607	0.760681	0.674211	0.762835	0.648108	0.690098	0.659444	0.751949	0.849782	0.673509	0.626284	0.640798	0.569082	0.599055	0.768111	0.688369	0.733178	0.762624	0.693268	0.558	0.694601	0.634671	0.616497	0.646028	0.644028	0.615408	0.708295	0.54083	0.630532	0.614931	0.455238	0.767885	0.815423
	8.61057	0.766479	0.599328	0.681089	0.676457	0.577745	0.604788	0.684754	0.735299	0.694332	0.616078	0.590856	0.741517	0.615833	0.728922	0.554808	0.690628	0.745397	0.653797	0.744645	0.624018	0.668373	0.642998	0.738444	0.844434	0.652669	0.601341	0.614116	0.536557	0.581894	0.75107	0.667072	0.717126	0.748368	0.67376	0.528517	0.675861	0.608475	0.592143	0.627691	0.625789	0.58619	0.691714	0.5117	0.612675	0.593138	0.426732	0.759066	0.80703
	9.00196	0.749659	0.569811	0.658889	0.655396	0.547798	0.581691	0.661721	0.719588	0.67716	0.595581	0.568109	0.722733	0.599029	0.715286	0.524366	0.669419	0.7305	0.633952	0.726308	0.600051	0.646655	0.627833	0.725866	0.839955	0.632146	0.57703	0.587493	0.503859	0.566733	0.733961	0.645818	0.701445	0.734624	0.65462	0.49941	0.657725	0.582431	0.568167	0.610916	0.608598	0.55682	0.67582	0.482997	0.596401	0.572603	0.400677	0.751334	0.799348
	9.39335	0.732761	0.540008	0.636684	0.634718	0.517737	0.559429	0.638443	0.704349	0.660755	0.575984	0.546378	0.703722	0.583922	0.702379	0.494107	0.648127	0.716126	0.61489	0.707931	0.576351	0.625145	0.614187	0.714322	0.83636	0.612203	0.553616	0.561085	0.471177	0.553829	0.71685	0.624691	0.686367	0.721514	0.635971	0.470852	0.640318	0.556719	0.544809	0.595923	0.592707	0.527382	0.660729	0.4548	0.581882	0.553569	0.377459	0.744708	0.792445
	9.78474	0.715819	0.509967	0.614502	0.614469	0.487435	0.537896	0.614871	0.689476	0.64507	0.557253	0.525582	0.684473	0.570547	0.69014	0.463924	0.626626	0.702268	0.596591	0.689531	0.552881	0.603776	0.601934	0.703872	0.833627	0.59272	0.531206	0.534977	0.438556	0.543009	0.699746	0.603626	0.67175	0.709034	0.617799	0.442819	0.623689	0.531395	0.521972	0.582792	0.577929	0.497936	0.64642	0.426984	0.569141	0.536147	0.357391	0.739133	0.786256
	10.1761	0.698871	0.479737	0.592394	0.594783	0.457091	0.517369	0.591068	0.675161	0.630301	0.539398	0.505977	0.664965	0.55894	0.678676	0.434109	0.604971	0.689027	0.579206	0.671199	0.529695	0.582704	0.591231	0.694559	0.831714	0.573901	0.510043	0.509296	0.406117	0.534389	0.68268	0.582623	0.657795	0.69726	0.600154	0.415397	0.607903	0.506611	0.499831	0.571636	0.564402	0.468547	0.632928	0.399489	0.558223	0.520506	0.340705	0.734518	0.780803
	10.5675	0.681961	0.449362	0.570377	0.575717	0.426678	0.497824	0.567033	0.661345	0.61641	0.522344	0.487527	0.645175	0.549035	0.667868	0.404719	0.583127	0.676395	0.562732	0.652965	0.506747	0.561904	0.581909	0.686387	0.830549	0.555669	0.490235	0.484141	0.373962	0.527692	0.66565	0.561607	0.644387	0.686164	0.582988	0.388613	0.592962	0.482439	0.478312	0.562451	0.551951	0.439298	0.620177	0.372219	0.549044	0.506688	0.327531	0.730718	0.775984
	10.9589	0.665143	0.418889	0.548477	0.557345	0.396238	0.47936	0.542773	0.648086	0.603482	0.506025	0.470319	0.625094	0.540752	0.657744	0.37586	0.561061	0.664397	0.54722	0.634891	0.484022	0.541431	0.573947	0.679339	0.830043	0.538074	0.471948	0.459598	0.342141	0.522798	0.64867	0.54053	0.63158	0.675755	0.566298	0.362498	0.578888	0.458997	0.457467	0.555224	0.540509	0.410271	0.608127	0.345085	0.541523	0.494764	0.317876	0.727573	0.771751
	11.3503	0.648481	0.388382	0.526728	0.539743	0.365907	0.462115	0.518368	0.63543	0.59155	0.490402	0.454443	0.604737	0.533978	0.648216	0.347791	0.538882	0.65305	0.532736	0.617043	0.461542	0.521357	0.567233	0.673375	0.830091	0.521165	0.455312	0.435779	0.310803	0.519458	0.631764	0.519391	0.61938	0.666025	0.550083	0.337179	0.565678	0.436411	0.437341	0.549894	0.530014	0.381582	0.596717	0.318128	0.535528	0.484744	0.311605	0.724913	0.768019
	11.7417	0.632048	0.357909	0.505149	0.522924	0.335617	0.446029	0.493808	0.623294	0.580574	0.475399	0.439829	0.584135	0.528554	0.639222	0.320494	0.516546	0.642307	0.519251	0.599457	0.439283	0.501655	0.561571	0.668437	0.83058	0.504851	0.440398	0.412742	0.279971	0.517336	0.614951	0.49816	0.607684	0.656926	0.534338	0.312688	0.553332	0.414782	0.417884	0.546334	0.520226	0.353339	0.58587	0.291328	0.530891	0.476602	0.308443	0.722572	0.76468
	12.1331	0.615918	0.327562	0.483789	0.506962	0.305596	0.431334	0.469222	0.611792	0.570642	0.461029	0.426641	0.563345	0.52435	0.630744	0.294336	0.494231	0.632198	0.506871	0.582228	0.417347	0.482471	0.55692	0.664456	0.831397	0.489274	0.427329	0.390586	0.249781	0.51626	0.598296	0.47692	0.596596	0.648474	0.519135	0.289206	0.541869	0.394288	0.39925	0.544439	0.511167	0.325668	0.575572	0.264833	0.527481	0.470327	0.307997	0.720413	0.761684
	12.5245	0.600161	0.29744	0.462671	0.491837	0.275791	0.417912	0.444636	0.60078	0.56164	0.447246	0.414738	0.542435	0.521178	0.622666	0.269338	0.471961	0.62264	0.495536	0.565388	0.395752	0.463763	0.553001	0.661347	0.832424	0.474301	0.41609	0.36935	0.220279	0.515806	0.581838	0.455698	0.585944	0.640596	0.504502	0.266791	0.531285	0.375033	0.381371	0.544014	0.502551	0.298681	0.565756	0.238721	0.525104	0.465819	0.309794	0.718313	0.758905
	12.9159	0.584841	0.267665	0.441847	0.477585	0.246383	0.405946	0.420164	0.590342	0.553645	0.434078	0.404243	0.521473	0.518902	0.615023	0.245862	0.449859	0.613637	0.48532	0.549034	0.374624	0.445679	0.54979	0.659024	0.833554	0.460062	0.406739	0.349091	0.191533	0.515843	0.565662	0.434605	0.575832	0.633302	0.490552	0.245583	0.521613	0.357202	0.364424	0.544911	0.494382	0.272477	0.556436	0.213125	0.523644	0.463028	0.313337	0.716188	0.75631
	13.3072	0.57001	0.238377	0.421347	0.464179	0.21743	0.395357	0.395889	0.580371	0.546546	0.421504	0.395035	0.500523	0.517343	0.6077	0.224119	0.428027	0.605115	0.476165	0.533212	0.354037	0.428229	0.547044	0.657387	0.834681	0.446479	0.399194	0.329838	0.163622	0.516006	0.549828	0.413716	0.566127	0.626531	0.477346	0.225659	0.512851	0.34091	0.348399	0.546918	0.486454	0.24714	0.547575	0.188158	0.522935	0.461813	0.318144	0.71397	0.753793
	13.6986	0.555709	0.209751	0.401208	0.451597	0.188983	0.386166	0.371878	0.57085	0.540342	0.409506	0.387099	0.479629	0.516349	0.600728	0.204423	0.406474	0.597025	0.468047	0.517993	0.334077	0.411492	0.544686	0.656332	0.835709	0.43358	0.393407	0.311586	0.136541	0.516131	0.534408	0.393101	0.556835	0.620253	0.464975	0.20705	0.505015	0.326296	0.333404	0.549844	0.478658	0.222724	0.539176	0.163846	0.52287	0.462075	0.323791	0.711611	0.751307
	14.09	0.541969	0.182028	0.381465	0.43982	0.161213	0.378369	0.348258	0.561759	0.534976	0.398058	0.380375	0.458817	0.515758	0.59404	0.187229	0.385326	0.589318	0.460925	0.503441	0.314841	0.395556	0.542582	0.655748	0.836547	0.421385	0.389254	0.294342	0.110367	0.515997	0.519465	0.372834	0.547923	0.614423	0.453502	0.189818	0.498096	0.313469	0.319515	0.553487	0.470915	0.199276	0.531225	0.140249	0.523327	0.463661	0.329919	0.709067	0.748786
	14.4814	0.528814	0.155563	0.362136	0.428772	0.134075	0.371808	0.32507	0.552976	0.53035	0.387061	0.374692	0.43809	0.515393	0.587612	0.172832	0.364525	0.581897	0.454663	0.489593	0.296345	0.380422	0.540572	0.655518	0.837107	0.4098	0.386574	0.278053	0.0850644	0.515365	0.505043	0.352916	0.539274	0.60896	0.442951	0.17389	0.492071	0.302484	0.306739	0.557622	0.463	0.176822	0.523681	0.117297	0.524191	0.466416	0.336242	0.706291	0.746151
	14.8728	0.516268	0.130947	0.34326	0.418434	0.107782	0.366517	0.302466	0.544543	0.52646	0.376449	0.370035	0.417438	0.515097	0.581431	0.161805	0.344156	0.57473	0.449214	0.47652	0.278672	0.366221	0.538625	0.655519	0.837311	0.398905	0.385226	0.262687	0.0606696	0.514149	0.491194	0.333388	0.530932	0.603828	0.433353	0.159277	0.486911	0.29341	0.295206	0.562063	0.454911	0.155385	0.516526	0.0950036	0.525372	0.470188	0.342532	0.70323	0.743366
	15.2642	0.504356	0.109196	0.324854	0.408708	0.082373	0.36224	0.280528	0.536299	0.523152	0.366065	0.366144	0.396839	0.514677	0.575412	0.15433	0.32421	0.567702	0.444382	0.464237	0.261796	0.352922	0.536537	0.655623	0.837083	0.388549	0.384974	0.248162	0.0371778	0.51207	0.477937	0.31421	0.522716	0.598913	0.424658	0.145865	0.482544	0.286213	0.284856	0.566572	0.446398	0.134992	0.509679	0.0734054	0.526741	0.47478	0.348606	0.699816	0.740332
	15.6556	0.49311	0.0920685	0.306968	0.399558	0.0581845	0.358976	0.259437	0.52828	0.520434	0.355798	0.362986	0.376276	0.513977	0.569573	0.150723	0.304727	0.560776	0.440087	0.452803	0.245764	0.340647	0.534316	0.655708	0.836356	0.378796	0.385667	0.234405	0.0147152	0.509095	0.46531	0.29539	0.51467	0.594167	0.416847	0.133599	0.478916	0.280885	0.275815	0.570972	0.437444	0.115672	0.503105	0.0528526	0.528222	0.480041	0.354314	0.695979	0.737023
	16.047	0.482565	0.0821536	0.289652	0.3909	0.0361933	0.356496	0.239393	0.520375	0.518167	0.3455	0.360327	0.355738	0.512823	0.563808	0.150772	0.285826	0.55386	0.436146	0.442232	0.230573	0.329396	0.531797	0.655649	0.835067	0.369534	0.387063	0.221329	0.00834711	0.50501	0.453329	0.276917	0.506646	0.589485	0.409834	0.122384	0.475933	0.277317	0.268019	0.575054	0.427896	0.0974686	0.496716	0.0348771	0.529691	0.485762	0.359526	0.691641	0.733357
	16.4384	0.472758	0.081751	0.272983	0.382673	0.0210763	0.354709	0.220649	0.512557	0.516328	0.335049	0.358068	0.335232	0.511075	0.55813	0.154209	0.267563	0.546897	0.432442	0.432558	0.216254	0.319242	0.52896	0.655336	0.833167	0.360755	0.388999	0.208828	0.0289112	0.499758	0.442024	0.258801	0.498621	0.584799	0.403559	0.112113	0.47352	0.275414	0.261532	0.578655	0.417671	0.0804243	0.490466	0.0254149	0.53108	0.491793	0.364137	0.686741	0.729303
	16.8298	0.463726	0.09064	0.257073	0.374827	0.0261266	0.353502	0.203582	0.504807	0.514851	0.324367	0.356085	0.314779	0.508623	0.55247	0.160464	0.250176	0.539843	0.428864	0.423805	0.202872	0.310248	0.52575	0.654668	0.83062	0.352447	0.391281	0.196826	0.0491694	0.493275	0.431429	0.241111	0.49055	0.580046	0.397948	0.102733	0.471593	0.27503	0.256336	0.581631	0.406774	0.0645941	0.48431	0.0329322	0.532312	0.497957	0.368062	0.681233	0.724829
	17.2211	0.455497	0.106197	0.242054	0.367288	0.0437338	0.352705	0.188577	0.497036	0.513666	0.313373	0.354218	0.294416	0.505378	0.546821	0.168922	0.233818	0.532628	0.425279	0.41598	0.19048	0.302433	0.522104	0.653562	0.827404	0.344536	0.393744	0.185213	0.0687827	0.485475	0.421575	0.22391	0.482336	0.575154	0.392925	0.0941169	0.470079	0.276002	0.252403	0.583853	0.395089	0.050033	0.478219	0.0503262	0.533341	0.504114	0.371252	0.675098	0.719903
	17.6125	0.448086	0.125678	0.228114	0.36004	0.0633418	0.352327	0.176173	0.489302	0.512789	0.302079	0.352465	0.274189	0.501317	0.541188	0.17907	0.218757	0.525254	0.42166	0.409114	0.179223	0.295907	0.51809	0.65196	0.823516	0.337104	0.396267	0.173928	0.0877437	0.476446	0.412518	0.207359	0.474031	0.57011	0.388455	0.0862384	0.468928	0.278185	0.249762	0.585257	0.382733	0.0368083	0.472215	0.0705422	0.534168	0.510158	0.373695	0.668358	0.714553
	18.0039	0.441499	0.147257	0.21546	0.353019	0.082891	0.352187	0.166852	0.481504	0.512131	0.290479	0.350663	0.254144	0.496423	0.535548	0.190322	0.205265	0.517666	0.417897	0.403195	0.169202	0.290655	0.513644	0.649817	0.81897	0.330065	0.398702	0.162889	0.106091	0.466126	0.404293	0.191611	0.465516	0.56486	0.384474	0.0789887	0.468087	0.281394	0.248303	0.585768	0.36964	0.025053	0.466311	0.0916016	0.534793	0.515983	0.375427	0.661059	0.708767
	18.3953	0.435724	0.169882	0.204353	0.346227	0.101777	0.352352	0.161113	0.473717	0.511752	0.278643	0.348877	0.234324	0.490748	0.52998	0.202406	0.193562	0.509884	0.414007	0.398244	0.160603	0.286782	0.508901	0.647116	0.8138	0.323535	0.400995	0.152057	0.123896	0.454671	0.396961	0.176907	0.456877	0.559424	0.380978	0.0723453	0.467542	0.285507	0.248058	0.585384	0.355932	0.0151651	0.460587	0.112842	0.535291	0.521558	0.376534	0.653288	0.70261
	18.7867	0.430739	0.192947	0.195061	0.339641	0.119804	0.352708	0.159229	0.465897	0.511589	0.26663	0.347011	0.214759	0.484345	0.52447	0.214892	0.183954	0.501895	0.409942	0.394238	0.153558	0.28426	0.503859	0.643855	0.808052	0.317481	0.403039	0.141406	0.141184	0.442104	0.390559	0.163504	0.448049	0.553788	0.377927	0.066249	0.467269	0.290361	0.248879	0.584088	0.341652	0.00899293	0.455104	0.133971	0.535714	0.526828	0.377145	0.645147	0.69611
	19.1781	0.426514	0.216096	0.187866	0.333264	0.136898	0.353295	0.161239	0.458076	0.511689	0.25452	0.345112	0.195463	0.4773	0.519123	0.227665	0.176586	0.493718	0.405713	0.391172	0.14822	0.283131	0.498642	0.640047	0.801788	0.311983	0.404817	0.130937	0.158057	0.428545	0.385128	0.151708	0.439073	0.547973	0.375314	0.0606722	0.467274	0.295858	0.250749	0.581903	0.326845	0.0104934	0.449964	0.15488	0.536172	0.531809	0.37743	0.636755	0.689335
	19.5695	0.423018	0.239107	0.18302	0.32712	0.152927	0.354111	0.166897	0.450301	0.512049	0.242405	0.34319	0.17644	0.469708	0.51396	0.240477	0.171643	0.48539	0.401338	0.389021	0.144689	0.283372	0.493341	0.635719	0.795081	0.307091	0.406283	0.120706	0.174545	0.414119	0.380692	0.141867	0.429977	0.542006	0.373111	0.0556237	0.467548	0.301879	0.253526	0.578858	0.311647	0.0160896	0.445259	0.175481	0.536756	0.536497	0.377579	0.628232	0.682352
	19.9609	0.420219	0.261837	0.1807	0.321219	0.167945	0.355119	0.175716	0.442556	0.512666	0.23034	0.341227	0.157681	0.461652	0.509058	0.253235	0.169195	0.476921	0.396803	0.387742	0.142997	0.284928	0.488021	0.630906	0.78801	0.302809	0.407425	0.110798	0.190735	0.398863	0.377255	0.134307	0.420733	0.535895	0.371273	0.0510904	0.468089	0.308337	0.257111	0.574965	0.296034	0.0218713	0.441073	0.195804	0.537559	0.540911	0.37779	0.619691	0.675215
	20.3523	0.418086	0.284185	0.180997	0.315621	0.181848	0.356409	0.187159	0.434956	0.513594	0.218422	0.339313	0.139179	0.453239	0.504473	0.265864	0.169202	0.468386	0.392172	0.387307	0.143138	0.287774	0.482842	0.625653	0.780659	0.299247	0.408257	0.101396	0.20668	0.382954	0.374816	0.129355	0.411438	0.529691	0.369764	0.0471579	0.468889	0.315157	0.261398	0.570275	0.280157	0.0270033	0.437499	0.215849	0.538672	0.54507	0.378254	0.611236	0.668014
	20.7436	0.416594	0.306076	0.183863	0.310349	0.194691	0.35789	0.200625	0.427475	0.514789	0.206704	0.337383	0.120936	0.444543	0.500227	0.27823	0.171622	0.459803	0.387423	0.387646	0.144986	0.291772	0.477819	0.620004	0.773115	0.296352	0.408757	0.0927408	0.222428	0.366399	0.373339	0.127185	0.402029	0.523397	0.36849	0.0438685	0.469919	0.322248	0.266204	0.564792	0.264006	0.0312968	0.434583	0.235658	0.540138	0.548965	0.379136	0.60295	0.660788
	21.135	0.415715	0.32745	0.189151	0.305482	0.206447	0.35967	0.215644	0.420239	0.516319	0.195287	0.335542	0.102975	0.435667	0.496391	0.290379	0.176231	0.451258	0.382636	0.388719	0.148417	0.296875	0.473113	0.614018	0.765465	0.294226	0.40897	0.0852102	0.238047	0.349354	0.372792	0.127857	0.392609	0.517066	0.367389	0.0413762	0.471157	0.329562	0.27145	0.558566	0.24768	0.0347127	0.432391	0.255253	0.542013	0.552611	0.380568	0.594908	0.653631
	21.5264	0.415418	0.348245	0.196603	0.301069	0.217101	0.361678	0.231754	0.413266	0.518136	0.184268	0.333738	0.0853592	0.4267	0.492936	0.30216	0.182838	0.4428	0.377829	0.390448	0.153198	0.302908	0.468736	0.607753	0.757797	0.292807	0.40888	0.0792758	0.253544	0.331882	0.37311	0.131201	0.383144	0.510717	0.366346	0.0397793	0.472552	0.337006	0.276912	0.551619	0.231258	0.0372551	0.430937	0.274599	0.544289	0.555968	0.382638	0.587168	0.646589
	21.9178	0.41567	0.368407	0.205922	0.297181	0.226702	0.363968	0.248631	0.406643	0.520281	0.173783	0.332031	0.068217	0.417749	0.489917	0.313641	0.191157	0.434506	0.373079	0.392777	0.15913	0.309782	0.464788	0.601282	0.750199	0.292129	0.408531	0.075483	0.268979	0.314082	0.374235	0.136922	0.37369	0.504394	0.365275	0.0392101	0.474067	0.344537	0.282499	0.543999	0.214776	0.0389544	0.430247	0.293675	0.546968	0.559032	0.385391	0.579787	0.639737
	22.3092	0.416425	0.38788	0.216779	0.293894	0.23517	0.366548	0.26598	0.400456	0.522734	0.164011	0.330439	0.0518267	0.408938	0.487292	0.324725	0.200876	0.426465	0.368472	0.395635	0.165964	0.317337	0.461321	0.594681	0.742757	0.292165	0.40793	0.0743207	0.28434	0.296117	0.376094	0.144613	0.364285	0.498149	0.364083	0.0397023	0.475651	0.352078	0.28801	0.535767	0.198408	0.0398723	0.430323	0.312358	0.550015	0.561759	0.388831	0.572819	0.633149
	22.7006	0.417635	0.40661	0.228859	0.291259	0.242578	0.369394	0.283574	0.394736	0.525483	0.155136	0.328954	0.0368732	0.400391	0.485069	0.335419	0.211736	0.418741	0.364082	0.398951	0.173483	0.325434	0.45835	0.588041	0.735558	0.292856	0.407101	0.0760317	0.29965	0.278054	0.378611	0.153851	0.354924	0.49202	0.362684	0.0412096	0.477262	0.359577	0.293315	0.526984	0.18218	0.04009	0.431153	0.33056	0.553384	0.564129	0.392929	0.566318	0.62688
	23.092	0.419243	0.424546	0.241874	0.289359	0.248846	0.372593	0.301248	0.389617	0.528549	0.147399	0.327669	0.0254072	0.392268	0.483224	0.345722	0.223405	0.41145	0.360056	0.402672	0.181486	0.333962	0.455966	0.581463	0.728685	0.294215	0.406085	0.0805338	0.314908	0.260112	0.381719	0.164251	0.345712	0.486089	0.361034	0.0436139	0.478872	0.366988	0.298285	0.517751	0.166276	0.0397279	0.432739	0.348137	0.557039	0.566126	0.397628	0.560345	0.621024
	23.4834	0.42119	0.441645	0.255559	0.288223	0.254007	0.376079	0.318835	0.385097	0.531871	0.141004	0.326543	0.0225804	0.384706	0.481718	0.355557	0.235669	0.404652	0.356474	0.40672	0.189771	0.342752	0.454127	0.575049	0.722219	0.296123	0.404891	0.087433	0.330093	0.242375	0.38534	0.175463	0.336614	0.480396	0.359076	0.0467167	0.480449	0.374255	0.302762	0.50815	0.150776	0.038932	0.435045	0.36497	0.560913	0.567729	0.402855	0.554959	0.615627
	23.8748	0.423422	0.457871	0.269697	0.287911	0.258049	0.37996	0.336255	0.381299	0.535485	0.136161	0.325691	0.0302541	0.377868	0.480553	0.364998	0.248288	0.398459	0.353502	0.411054	0.19821	0.351734	0.452916	0.568916	0.716236	0.298598	0.403582	0.0962339	0.345217	0.225028	0.389417	0.187237	0.327746	0.475031	0.35681	0.050365	0.481986	0.38136	0.306698	0.498302	0.135788	0.0378815	0.43807	0.380974	0.564972	0.56896	0.408529	0.550217	0.610778
	24.2661	0.425886	0.473197	0.284088	0.288435	0.260946	0.38418	0.353392	0.37823	0.539317	0.133	0.325087	0.0426979	0.371884	0.479656	0.373933	0.261086	0.392939	0.351233	0.415602	0.206651	0.360749	0.452282	0.563171	0.710799	0.301516	0.402166	0.106424	0.360234	0.208203	0.393876	0.199346	0.319099	0.470047	0.354215	0.0543643	0.483469	0.388254	0.309944	0.488309	0.121445	0.0367873	0.441767	0.396058	0.569151	0.569814	0.41457	0.546164	0.60652
	24.6575	0.428541	0.487606	0.298577	0.289807	0.262764	0.388795	0.370201	0.375946	0.543374	0.13158	0.324799	0.0565277	0.366871	0.479034	0.382433	0.273957	0.388166	0.349792	0.420321	0.215024	0.369738	0.452245	0.557924	0.705964	0.304859	0.400707	0.117589	0.375152	0.191986	0.39866	0.211655	0.31074	0.465511	0.351301	0.0586209	0.484901	0.394931	0.312495	0.478278	0.107761	0.0358784	0.446112	0.41022	0.573408	0.570328	0.4209	0.542835	0.602908
	25.0489	0.431349	0.501083	0.31302	0.29202	0.263455	0.3938	0.386614	0.374479	0.547603	0.131864	0.324846	0.0706865	0.362917	0.47861	0.390433	0.286767	0.384213	0.349276	0.425156	0.223241	0.378588	0.452778	0.553273	0.701772	0.308546	0.399228	0.129383	0.389926	0.176534	0.403703	0.224044	0.302709	0.461482	0.348069	0.0630141	0.486273	0.401355	0.31426	0.468316	0.0948718	0.0354044	0.451051	0.423433	0.577681	0.570512	0.427443	0.540237	0.599979
	25.4403	0.434283	0.513623	0.327296	0.295034	0.263117	0.399152	0.402578	0.373801	0.551952	0.13371	0.325211	0.0848188	0.360059	0.47836	0.397934	0.299501	0.381105	0.349737	0.430053	0.231259	0.387217	0.453813	0.549302	0.698246	0.312491	0.397764	0.141541	0.404535	0.161859	0.408938	0.236437	0.295	0.457989	0.344505	0.0674944	0.487575	0.407509	0.315217	0.458501	0.0827602	0.0356013	0.456521	0.43573	0.581902	0.570383	0.434124	0.538353	0.59774
	25.8317	0.437318	0.525217	0.341302	0.298821	0.261738	0.404888	0.418062	0.373954	0.556397	0.136927	0.325942	0.0987825	0.358312	0.478221	0.404956	0.312079	0.378897	0.351248	0.434972	0.239044	0.395565	0.45534	0.546081	0.695393	0.316665	0.396356	0.15385	0.418952	0.148091	0.4143	0.248778	0.28769	0.455082	0.340602	0.0720091	0.488793	0.41337	0.315346	0.448926	0.0714971	0.036668	0.462454	0.447126	0.586	0.569953	0.440864	0.537142	0.59621
	26.2231	0.440431	0.535856	0.354934	0.3033	0.259381	0.410892	0.432994	0.37485	0.560838	0.141247	0.326953	0.112509	0.357628	0.47812	0.411421	0.324488	0.377573	0.353786	0.43985	0.246543	0.403521	0.457225	0.543658	0.693198	0.32093	0.395004	0.166129	0.433121	0.135245	0.419711	0.261	0.280722	0.452755	0.33631	0.0765056	0.489888	0.418896	0.31458	0.439644	0.0611211	0.0387363	0.468742	0.457615	0.589868	0.569199	0.447571	0.53653	0.595352
	26.6145	0.443596	0.545531	0.368111	0.308416	0.2561	0.41719	0.447351	0.376503	0.565261	0.146413	0.328279	0.125953	0.35794	0.478008	0.417404	0.336699	0.377144	0.357373	0.444655	0.253742	0.411056	0.45944	0.542061	0.691634	0.325275	0.393749	0.178238	0.447022	0.123394	0.425104	0.273064	0.274162	0.451028	0.331606	0.080965	0.490832	0.424064	0.312943	0.430724	0.0516315	0.0418461	0.475296	0.467202	0.593416	0.568115	0.454138	0.536426	0.595155
	27.0059	0.446788	0.554225	0.380742	0.314073	0.251897	0.423659	0.461062	0.37881	0.569555	0.152137	0.329819	0.139073	0.359134	0.477771	0.42281	0.348649	0.377571	0.361938	0.449327	0.260567	0.418054	0.461841	0.541298	0.690652	0.329559	0.392569	0.190039	0.460581	0.112621	0.430399	0.284893	0.267955	0.449876	0.326428	0.0853145	0.491571	0.428815	0.310343	0.42221	0.0431368	0.0459661	0.481983	0.475816	0.596513	0.566648	0.460441	0.536721	0.595562
	27.3973	0.449977	0.561926	0.392757	0.320188	0.246872	0.430269	0.474094	0.381724	0.573686	0.158171	0.331554	0.15183	0.361083	0.477362	0.427696	0.360333	0.378812	0.367437	0.453835	0.266986	0.42448	0.464351	0.541358	0.690192	0.333741	0.391482	0.20143	0.473766	0.102953	0.435534	0.296442	0.262116	0.449284	0.320743	0.0895378	0.492065	0.433119	0.306801	0.41415	0.0356246	0.0510076	0.488694	0.483416	0.59905	0.56477	0.466341	0.537301	0.596525
	27.7887	0.453132	0.56862	0.404081	0.32667	0.240996	0.436951	0.486402	0.385167	0.577576	0.16428	0.333427	0.16418	0.363644	0.476663	0.432023	0.371656	0.380815	0.373786	0.458135	0.272923	0.430251	0.466866	0.542211	0.690185	0.33773	0.39047	0.212304	0.486513	0.0945375	0.440443	0.307636	0.256628	0.449222	0.314521	0.0935698	0.492271	0.436919	0.302257	0.406592	0.029192	0.0568534	0.495306	0.489905	0.600907	0.562426	0.471691	0.538051	0.597989
	28.18	0.456226	0.574299	0.414655	0.333416	0.234362	0.44361	0.497943	0.389026	0.581155	0.17026	0.335356	0.176086	0.366663	0.475616	0.435774	0.382606	0.383494	0.380884	0.46219	0.278324	0.435305	0.469261	0.543812	0.69055	0.34144	0.389519	0.222574	0.498768	0.0874089	0.445073	0.318422	0.251446	0.449645	0.307745	0.0973893	0.492153	0.440178	0.296704	0.399568	0.0238611	0.0633819	0.501708	0.495216	0.601977	0.559578	0.476343	0.538865	0.599877
	28.5714	0.459233	0.578962	0.42443	0.340347	0.226975	0.450244	0.508709	0.393254	0.584392	0.175962	0.337345	0.187516	0.370005	0.474138	0.438991	0.393116	0.386791	0.388656	0.46598	0.28314	0.439615	0.47149	0.546104	0.691208	0.344847	0.388626	0.232166	0.510492	0.0817193	0.449385	0.328761	0.246598	0.450526	0.300435	0.100983	0.491694	0.442864	0.290155	0.393134	0.0195887	0.0704684	0.507813	0.499298	0.602184	0.556201	0.480166	0.539655	0.602143
	28.9628	0.462134	0.582616	0.433362	0.347356	0.218882	0.456731	0.518659	0.397705	0.587196	0.181249	0.339288	0.198449	0.373523	0.472158	0.441601	0.403154	0.390598	0.39697	0.469468	0.287318	0.443105	0.473417	0.549017	0.692074	0.347842	0.387756	0.241003	0.521616	0.0775437	0.45334	0.33861	0.242003	0.451804	0.292608	0.104339	0.490877	0.444937	0.282589	0.387314	0.0163318	0.0780061	0.513531	0.502108	0.601451	0.552265	0.483049	0.540342	0.604703
	29.3542	0.464917	0.585277	0.441427	0.354374	0.210162	0.463092	0.527811	0.402336	0.589563	0.186057	0.341211	0.208876	0.377102	0.469648	0.443683	0.412718	0.394845	0.405756	0.472647	0.290859	0.445785	0.475029	0.552476	0.693066	0.350447	0.386919	0.249039	0.53212	0.0749704	0.456925	0.347977	0.237706	0.453448	0.284322	0.107509	0.489714	0.446394	0.27409	0.382154	0.0138379	0.0859024	0.518821	0.503675	0.599753	0.547779	0.484915	0.540869	0.607511
	29.7456	0.467575	0.586969	0.448599	0.361306	0.200825	0.469233	0.536142	0.407017	0.591415	0.190322	0.343038	0.218799	0.380621	0.466539	0.445169	0.421771	0.399431	0.414883	0.475488	0.293741	0.4476	0.476228	0.556393	0.694103	0.352579	0.386079	0.256212	0.541942	0.0740867	0.460115	0.35685	0.233637	0.4554	0.275618	0.110509	0.488206	0.447205	0.264661	0.377674	0.0118741	0.094085	0.523628	0.504017	0.59706	0.542736	0.48572	0.541187	0.610493
	30.137	0.470107	0.587723	0.45487	0.368085	0.191007	0.475137	0.543663	0.411678	0.592741	0.194029	0.344762	0.228227	0.383976	0.462841	0.446109	0.430361	0.404269	0.424266	0.477983	0.296001	0.448564	0.47699	0.560681	0.695109	0.354253	0.385243	0.26249	0.55106	0.0748633	0.462903	0.365264	0.229814	0.457613	0.266553	0.113412	0.48637	0.447382	0.25441	0.373896	0.010216	0.102507	0.527935	0.503216	0.593382	0.537161	0.485454	0.541259	0.61359
	30.5284	0.472512	0.587572	0.460232	0.37464	0.180735	0.480769	0.550378	0.416237	0.5935	0.197165	0.346364	0.237173	0.387072	0.458508	0.446502	0.438465	0.40928	0.433795	0.480118	0.297666	0.448665	0.477285	0.565241	0.696011	0.355451	0.384393	0.267834	0.559436	0.0773244	0.465275	0.373236	0.226216	0.460035	0.257174	0.11626	0.484217	0.44691	0.243394	0.370832	0.0087279	0.111135	0.531717	0.501337	0.588728	0.531063	0.484131	0.541048	0.616741
	30.9198	0.474792	0.586548	0.464682	0.3809	0.170143	0.486046	0.556271	0.42059	0.593654	0.199717	0.347778	0.245649	0.389802	0.453556	0.446327	0.446127	0.414362	0.443351	0.481873	0.298773	0.447893	0.477055	0.569974	0.69674	0.356144	0.383515	0.272218	0.567029	0.0813315	0.467216	0.380796	0.222811	0.462602	0.247501	0.119093	0.481747	0.445791	0.231691	0.368472	0.00764041	0.119959	0.534958	0.498447	0.583116	0.524454	0.481782	0.540515	0.619873
	31.3112	0.476943	0.584685	0.468222	0.386821	0.159324	0.490975	0.561359	0.424702	0.593204	0.201684	0.349022	0.253658	0.392081	0.447973	0.445653	0.453351	0.419455	0.452846	0.483247	0.299374	0.446277	0.476318	0.574776	0.697229	0.35637	0.382612	0.275626	0.573824	0.086816	0.468714	0.387969	0.21963	0.465267	0.237565	0.121948	0.478963	0.444026	0.219411	0.366817	0.00745909	0.128971	0.537648	0.494615	0.576577	0.517349	0.478441	0.539621	0.622937
	31.7025	0.478959	0.58201	0.470849	0.392334	0.148375	0.495438	0.565611	0.428456	0.592094	0.20303	0.349997	0.261198	0.393803	0.441754	0.444419	0.460132	0.424463	0.462141	0.484213	0.29948	0.443783	0.475	0.579541	0.697418	0.356071	0.38165	0.278036	0.579767	0.0936196	0.469742	0.394753	0.216608	0.467952	0.227358	0.124809	0.475848	0.441597	0.206593	0.365835	0.00869133	0.138169	0.539755	0.489853	0.569122	0.509732	0.474137	0.538319	0.625852
	32.0939	0.480833	0.578552	0.472569	0.397408	0.137464	0.499438	0.569038	0.431837	0.590346	0.20374	0.350712	0.268257	0.394888	0.434916	0.442709	0.466494	0.42933	0.471157	0.484774	0.299134	0.440453	0.473126	0.584164	0.697251	0.355293	0.380635	0.279451	0.584848	0.101611	0.470287	0.401159	0.213796	0.470612	0.216893	0.127691	0.472393	0.438511	0.193363	0.365511	0.011328	0.147551	0.541269	0.484196	0.560786	0.501608	0.468888	0.536568	0.628574
	32.4853	0.482553	0.574334	0.473382	0.401993	0.126679	0.502884	0.571618	0.434754	0.587917	0.203771	0.351091	0.274816	0.395247	0.427436	0.440489	0.472389	0.433983	0.479764	0.484908	0.298323	0.436257	0.470647	0.588542	0.696679	0.35399	0.37953	0.279863	0.589023	0.110688	0.470325	0.407161	0.211139	0.473174	0.206174	0.130554	0.468575	0.434744	0.179764	0.36581	0.0149606	0.157104	0.542155	0.47762	0.551586	0.492949	0.462699	0.534329	0.631036
	32.8767	0.484109	0.569385	0.4733	0.406059	0.116237	0.505738	0.57335	0.437176	0.584825	0.203101	0.351103	0.280856	0.394814	0.419348	0.437793	0.477837	0.438362	0.487882	0.484615	0.297059	0.431221	0.467564	0.592578	0.695659	0.352177	0.378328	0.279288	0.592271	0.120696	0.469845	0.412747	0.20867	0.475586	0.195219	0.133392	0.464384	0.4303	0.165915	0.366706	0.0193037	0.166814	0.542403	0.47013	0.541565	0.48375	0.455564	0.531574	0.633193
	33.2681	0.485495	0.563734	0.472334	0.409581	0.106309	0.507981	0.574242	0.439068	0.58107	0.201723	0.350737	0.286358	0.393544	0.410631	0.434657	0.482795	0.442427	0.495427	0.483889	0.29534	0.425353	0.463888	0.596184	0.69416	0.349857	0.377008	0.277743	0.594575	0.131588	0.468837	0.417895	0.206381	0.477803	0.184077	0.136194	0.459817	0.425167	0.151929	0.368175	0.0242335	0.176658	0.542002	0.461732	0.530771	0.473998	0.447478	0.528292	0.63501
	33.6595	0.486705	0.557415	0.470506	0.412527	0.0971583	0.50954	0.574287	0.440373	0.576654	0.199635	0.349929	0.29131	0.391402	0.401323	0.431053	0.487267	0.446118	0.502318	0.482724	0.293162	0.418655	0.459595	0.599281	0.692159	0.347007	0.375546	0.275253	0.595904	0.143219	0.4673	0.422585	0.204272	0.479772	0.172798	0.13895	0.454875	0.419349	0.137937	0.370189	0.0296055	0.186617	0.540951	0.452439	0.519271	0.463693	0.438443	0.52449	0.636447
	34.0509	0.487741	0.550472	0.467846	0.414895	0.0891292	0.510458	0.573522	0.441103	0.571625	0.196886	0.348723	0.29571	0.388393	0.391438	0.42707	0.491254	0.44942	0.508522	0.481133	0.29056	0.411177	0.454753	0.601803	0.689645	0.343683	0.373947	0.271867	0.596268	0.155537	0.465247	0.426825	0.202389	0.481476	0.161483	0.141691	0.449582	0.412864	0.12418	0.372742	0.0354042	0.196672	0.539282	0.442324	0.507165	0.452854	0.428477	0.5202	0.6375
	34.4423	0.488606	0.542948	0.464385	0.416659	0.0825665	0.510664	0.571948	0.441197	0.565977	0.193522	0.347064	0.299565	0.384522	0.381009	0.422661	0.494747	0.452289	0.513971	0.47911	0.287552	0.402918	0.449348	0.603695	0.686621	0.339852	0.372182	0.267625	0.595642	0.168431	0.462688	0.430609	0.200707	0.482875	0.150223	0.144413	0.443955	0.405718	0.110895	0.375808	0.0415464	0.206809	0.53702	0.431445	0.494556	0.441499	0.417626	0.515467	0.638142
	34.8337	0.489307	0.534897	0.46017	0.417826	0.07794	0.510208	0.569607	0.440685	0.559782	0.189628	0.345001	0.302889	0.37983	0.3701	0.417904	0.497796	0.454717	0.518661	0.476673	0.284211	0.393949	0.443468	0.604916	0.683098	0.335591	0.370269	0.262601	0.594041	0.181789	0.459648	0.433974	0.199301	0.483967	0.139137	0.14715	0.438034	0.397952	0.0985038	0.379389	0.0479763	0.217025	0.534232	0.419923	0.481592	0.42968	0.405959	0.510353	0.638387
	35.2251	0.48985	0.526368	0.455241	0.418388	0.0755789	0.509066	0.566518	0.439532	0.553054	0.185284	0.342522	0.305703	0.374355	0.358741	0.412799	0.500392	0.456684	0.522547	0.473822	0.280596	0.384291	0.437145	0.605435	0.679099	0.3309	0.368195	0.256861	0.591464	0.195532	0.456146	0.436938	0.198152	0.484735	0.128345	0.149897	0.431846	0.389584	0.0875106	0.383466	0.0546608	0.227316	0.53097	0.407859	0.468417	0.417434	0.39357	0.504928	0.63823
	35.6164	0.490241	0.517413	0.44965	0.418349	0.075683	0.507239	0.562705	0.43775	0.545853	0.18057	0.339632	0.308029	0.368146	0.347027	0.407363	0.502592	0.458179	0.525619	0.470571	0.276788	0.374001	0.430445	0.60523	0.674656	0.325827	0.365973	0.250497	0.587912	0.209494	0.452204	0.439546	0.197321	0.485178	0.11796	0.15264	0.425422	0.38066	0.0785903	0.38803	0.0614892	0.237685	0.527311	0.395363	0.4552	0.404824	0.38057	0.499263	0.637679
	36.0078	0.490479	0.508081	0.443442	0.417723	0.0782032	0.504758	0.558203	0.435356	0.538229	0.175564	0.336365	0.309887	0.361256	0.335003	0.401659	0.504405	0.459208	0.527859	0.466929	0.272869	0.363136	0.423455	0.604287	0.669806	0.320424	0.36361	0.243606	0.58341	0.223596	0.447841	0.44183	0.196817	0.485298	0.108116	0.155361	0.418783	0.371208	0.0725536	0.393063	0.0684474	0.248132	0.523326	0.382539	0.44211	0.391899	0.36708	0.493429	0.636752
	36.3992	0.490564	0.49841	0.436664	0.416511	0.0827873	0.501576	0.55301	0.432331	0.530217	0.170306	0.332677	0.31129	0.353724	0.322758	0.395652	0.50585	0.459753	0.529233	0.462896	0.268892	0.351722	0.416205	0.602595	0.664593	0.314695	0.361101	0.236298	0.577948	0.23767	0.443066	0.443813	0.196656	0.485083	0.0989295	0.157991	0.41194	0.361259	0.0700358	0.398533	0.0754288	0.25865	0.519076	0.369443	0.42931	0.378706	0.353215	0.487486	0.635447
	36.7906	0.490491	0.488439	0.429362	0.414743	0.0890422	0.497746	0.547163	0.428733	0.521898	0.164849	0.328613	0.312247	0.345604	0.310356	0.389432	0.506952	0.459834	0.529744	0.45849	0.264924	0.339834	0.408809	0.600154	0.659063	0.308718	0.358468	0.228707	0.571557	0.251615	0.437894	0.44552	0.19688	0.484548	0.0905655	0.160495	0.404903	0.350849	0.0713071	0.404413	0.0824036	0.269228	0.514628	0.356143	0.416974	0.365296	0.339082	0.48149	0.633793
	37.182	0.490252	0.478199	0.421575	0.412422	0.0964871	0.493214	0.540656	0.42454	0.51329	0.159208	0.324119	0.312757	0.336934	0.29786	0.382968	0.507686	0.459441	0.529345	0.453705	0.260981	0.327483	0.401287	0.596963	0.653265	0.302474	0.35569	0.22097	0.564235	0.265316	0.432324	0.446943	0.197454	0.483678	0.0832105	0.162795	0.397666	0.33999	0.0759947	0.410648	0.089328	0.279839	0.510022	0.342651	0.405244	0.351695	0.324767	0.475484	0.631789
	37.5734	0.489841	0.467717	0.413345	0.40958	0.104738	0.488017	0.533513	0.419812	0.504484	0.153414	0.319213	0.312819	0.327769	0.285351	0.37631	0.508079	0.45859	0.528048	0.448558	0.257088	0.314734	0.393739	0.593029	0.647249	0.296027	0.352784	0.213255	0.556006	0.278644	0.426366	0.448086	0.198427	0.482487	0.0771032	0.164848	0.390235	0.328719	0.0833304	0.417195	0.0961492	0.290455	0.505312	0.328997	0.394275	0.337951	0.310344	0.469514	0.629462
	37.9648	0.489253	0.457022	0.404712	0.406239	0.113511	0.482151	0.525746	0.414558	0.495513	0.147505	0.313884	0.31243	0.318168	0.272866	0.369482	0.508093	0.457293	0.525827	0.443049	0.253247	0.301612	0.38621	0.588365	0.641069	0.289377	0.349733	0.205736	0.546894	0.291544	0.420024	0.448925	0.199744	0.480969	0.0725294	0.166618	0.382608	0.317043	0.0925443	0.423986	0.102893	0.301038	0.500526	0.315197	0.384188	0.324087	0.295866	0.463619	0.626827
	38.3562	0.488487	0.44614	0.395716	0.402423	0.122535	0.475617	0.517369	0.408815	0.486449	0.141528	0.308111	0.311589	0.3082	0.260491	0.362471	0.507742	0.455558	0.522694	0.437188	0.249454	0.288156	0.378762	0.582993	0.634777	0.282544	0.346533	0.198615	0.536911	0.303885	0.41331	0.449448	0.201424	0.479134	0.0697478	0.168068	0.374797	0.304994	0.102944	0.430962	0.109509	0.311551	0.495704	0.301278	0.375104	0.310152	0.281382	0.457843	0.623908
	38.7475	0.487545	0.435104	0.386401	0.39817	0.13169	0.468476	0.50842	0.402637	0.477357	0.135572	0.301941	0.310306	0.297958	0.248257	0.355352	0.507016	0.453418	0.51867	0.430992	0.245731	0.274422	0.371483	0.576944	0.628429	0.275571	0.343186	0.192103	0.526106	0.31563	0.406241	0.449641	0.203428	0.476999	0.0689478	0.169208	0.366823	0.292594	0.11409	0.438062	0.116051	0.32196	0.490883	0.287305	0.367117	0.296193	0.266937	0.452235	0.620743
	39.1389	0.486431	0.423944	0.37681	0.393501	0.140816	0.460713	0.498911	0.396035	0.468284	0.129726	0.295342	0.308596	0.287539	0.236242	0.348081	0.505914	0.45088	0.513767	0.424464	0.242079	0.260432	0.364407	0.570258	0.622081	0.268444	0.339675	0.186419	0.514496	0.326676	0.398835	0.449491	0.205724	0.474572	0.0701329	0.170017	0.358712	0.279872	0.125645	0.445216	0.122502	0.33223	0.486097	0.273332	0.360301	0.282271	0.252587	0.446846	0.617354
	39.5303	0.485152	0.412699	0.366992	0.388464	0.149847	0.452423	0.488893	0.389091	0.459322	0.124114	0.28838	0.306482	0.277068	0.224497	0.340727	0.504467	0.447988	0.508048	0.41763	0.238542	0.246268	0.357644	0.562988	0.615792	0.261236	0.336019	0.181787	0.502137	0.336955	0.391124	0.449012	0.208305	0.47189	0.0731151	0.170516	0.350504	0.266871	0.137373	0.452376	0.128894	0.342336	0.481398	0.259469	0.354714	0.268474	0.238397	0.441735	0.613797
	39.9217	0.483715	0.4014	0.356988	0.383083	0.158716	0.443613	0.478388	0.381816	0.4505	0.118849	0.281051	0.303997	0.266667	0.213083	0.333278	0.502667	0.444761	0.501533	0.410494	0.235147	0.231959	0.351223	0.555194	0.609619	0.253934	0.332202	0.1784	0.489065	0.346409	0.38313	0.448207	0.211101	0.468969	0.0775747	0.170693	0.342237	0.25362	0.149139	0.459473	0.135262	0.352253	0.476821	0.245802	0.35037	0.254887	0.224447	0.436956	0.610099
	40.3131	0.482125	0.390082	0.346848	0.377402	0.167345	0.434359	0.467437	0.374287	0.441908	0.114031	0.27339	0.301177	0.256472	0.202075	0.325748	0.500566	0.441234	0.494296	0.403083	0.231935	0.217581	0.34524	0.546947	0.60362	0.246603	0.328245	0.176435	0.475326	0.354931	0.374889	0.447109	0.214124	0.465851	0.083123	0.170539	0.333955	0.240175	0.160785	0.466465	0.141594	0.361958	0.472422	0.232436	0.347271	0.241635	0.210831	0.432561	0.606311
	40.7045	0.480385	0.378773	0.336609	0.371459	0.17573	0.424713	0.456074	0.366539	0.433576	0.10975	0.265433	0.298058	0.246615	0.191515	0.318179	0.498158	0.437446	0.486376	0.395404	0.228942	0.203194	0.339742	0.53832	0.597846	0.239262	0.324149	0.176	0.460978	0.362491	0.366423	0.445738	0.217297	0.462564	0.0894163	0.170048	0.325696	0.22657	0.172254	0.47329	0.147959	0.371427	0.468234	0.219462	0.345369	0.228834	0.19765	0.42859	0.602471
	41.0959	0.478493	0.367494	0.326309	0.365286	0.183786	0.414702	0.444318	0.358619	0.425564	0.106038	0.257164	0.294675	0.237221	0.181488	0.310532	0.495475	0.43342	0.477826	0.387473	0.226168	0.18885	0.334773	0.529395	0.592347	0.231936	0.319921	0.177151	0.446052	0.368985	0.357756	0.444127	0.220618	0.459138	0.0961613	0.169177	0.317493	0.212858	0.183448	0.479901	0.154332	0.380628	0.464294	0.206933	0.344601	0.21663	0.185009	0.42507	0.598613
	41.4873	0.476448	0.356262	0.31598	0.358929	0.19152	0.404418	0.43221	0.350594	0.417913	0.102921	0.248637	0.291059	0.228415	0.17202	0.302874	0.492524	0.429205	0.468707	0.379307	0.223622	0.174635	0.330395	0.520254	0.587164	0.224681	0.315579	0.179864	0.430617	0.374391	0.348909	0.442302	0.224039	0.45561	0.103144	0.16792	0.30938	0.199079	0.194327	0.48624	0.160776	0.38953	0.460624	0.19491	0.344865	0.205171	0.173009	0.422009	0.594776
	41.8787	0.474245	0.345085	0.305642	0.352414	0.198886	0.393858	0.419751	0.342483	0.410638	0.100384	0.239811	0.287236	0.220293	0.163177	0.295161	0.48929	0.424817	0.459047	0.37091	0.22126	0.160588	0.326595	0.51098	0.58233	0.217479	0.311113	0.184051	0.414706	0.378658	0.33989	0.440271	0.22752	0.451995	0.110227	0.166239	0.301376	0.185271	0.204866	0.492244	0.167295	0.39809	0.457226	0.1834	0.346035	0.194616	0.161738	0.419395	0.590974
	42.2701	0.471881	0.333968	0.295318	0.345788	0.205868	0.383118	0.406979	0.334369	0.403787	0.0984036	0.230722	0.283228	0.212953	0.154975	0.287429	0.485791	0.420302	0.448919	0.362301	0.219045	0.146806	0.323422	0.501656	0.57787	0.210393	0.306546	0.189576	0.398379	0.381756	0.330715	0.438052	0.231048	0.448329	0.117306	0.164132	0.293511	0.171486	0.215025	0.497856	0.173918	0.406266	0.454098	0.172429	0.347973	0.185138	0.151274	0.417202	0.587242
	42.6615	0.469355	0.322915	0.285015	0.339075	0.21248	0.372215	0.393904	0.326261	0.397341	0.0969649	0.221356	0.279056	0.206459	0.147433	0.279681	0.481985	0.415684	0.438354	0.353483	0.216919	0.133354	0.320831	0.492364	0.573795	0.203396	0.301864	0.196252	0.381691	0.383709	0.321386	0.435634	0.23455	0.444617	0.12434	0.161599	0.285805	0.157757	0.224838	0.503	0.180692	0.414013	0.451206	0.16201	0.350512	0.1769	0.141676	0.415384	0.583583
	43.0528	0.466669	0.311928	0.274746	0.332312	0.218692	0.361221	0.380551	0.318229	0.391333	0.0960424	0.211713	0.274739	0.200865	0.140557	0.271893	0.477882	0.410996	0.427424	0.344475	0.214819	0.120345	0.318827	0.483186	0.570111	0.196524	0.297082	0.203888	0.36469	0.384493	0.311919	0.433019	0.238028	0.440885	0.131285	0.15865	0.278292	0.144152	0.234277	0.50762	0.187614	0.421287	0.448525	0.152174	0.353497	0.17008	0.132992	0.413885	0.58002
	43.4442	0.463827	0.301011	0.264515	0.32553	0.224558	0.350206	0.366954	0.3103	0.385736	0.0956389	0.201831	0.270303	0.196197	0.134316	0.264116	0.473454	0.406274	0.416189	0.335286	0.21271	0.107927	0.317365	0.474202	0.566811	0.189773	0.292203	0.212271	0.347452	0.384179	0.302322	0.430195	0.241407	0.437143	0.13812	0.155332	0.27101	0.130733	0.24339	0.511645	0.194754	0.428053	0.446001	0.142995	0.356751	0.164821	0.125254	0.412644	0.576557
	43.8356	0.460838	0.290173	0.254327	0.318751	0.23006	0.339212	0.353135	0.302507	0.380551	0.0957371	0.19169	0.265779	0.192453	0.128697	0.256297	0.468698	0.401536	0.404718	0.325931	0.210539	0.0962773	0.316397	0.465493	0.563881	0.18314	0.287229	0.221206	0.330026	0.382772	0.292615	0.427158	0.244675	0.433406	0.144817	0.151666	0.264003	0.117603	0.252179	0.51502	0.202091	0.434275	0.443589	0.134554	0.360119	0.161251	0.118484	0.4116	0.573201
	44.227	0.457711	0.279425	0.244187	0.312009	0.235247	0.328362	0.339149	0.2949	0.37576	0.0963216	0.18136	0.261205	0.189613	0.123632	0.248486	0.463621	0.396829	0.393108	0.316435	0.2083	0.0857013	0.315895	0.457137	0.561301	0.17666	0.282187	0.230505	0.312495	0.380345	0.282821	0.423917	0.247787	0.429697	0.151338	0.147715	0.25733	0.104903	0.260661	0.5177	0.209675	0.439932	0.441243	0.126994	0.363452	0.15944	0.112695	0.410694	0.569968
	44.6184	0.454455	0.268778	0.234096	0.305315	0.240142	0.317689	0.325025	0.287478	0.371326	0.0973578	0.170835	0.256625	0.187619	0.119083	0.240655	0.458211	0.392166	0.381427	0.306808	0.205976	0.0765606	0.315774	0.449208	0.559046	0.170306	0.277079	0.239998	0.294923	0.376952	0.272966	0.420478	0.250705	0.426021	0.157653	0.143511	0.251047	0.0928373	0.268865	0.51964	0.217493	0.445001	0.438912	0.12045	0.366615	0.159399	0.107891	0.409874	0.56685
	45.0098	0.45108	0.258246	0.224061	0.2987	0.244756	0.307327	0.310828	0.2803	0.367243	0.0987785	0.160167	0.252091	0.186406	0.114969	0.23281	0.452504	0.387584	0.369791	0.297083	0.203566	0.0693653	0.316024	0.44178	0.557085	0.164136	0.271949	0.249535	0.277384	0.372644	0.263086	0.416877	0.253427	0.422411	0.163709	0.139097	0.245221	0.0817195	0.276764	0.520824	0.225536	0.449468	0.436568	0.115069	0.369507	0.161079	0.104065	0.409095	0.563867
	45.4012	0.447591	0.247838	0.214081	0.292172	0.249146	0.297333	0.296603	0.27335	0.36345	0.100517	0.149387	0.247656	0.185872	0.111229	0.224977	0.446487	0.383104	0.358272	0.287275	0.201072	0.0646718	0.316557	0.434916	0.555387	0.158133	0.266814	0.258977	0.259962	0.367525	0.253211	0.41314	0.255896	0.418871	0.169476	0.13451	0.239912	0.0719926	0.28439	0.521228	0.233803	0.453317	0.434169	0.110976	0.372036	0.164359	0.101199	0.408317	0.561007
	45.7926	0.443991	0.237562	0.204161	0.285745	0.253297	0.287806	0.282408	0.266664	0.359936	0.102475	0.138498	0.243373	0.185917	0.107791	0.217111	0.440192	0.378744	0.346978	0.277417	0.198474	0.0629018	0.317359	0.428673	0.553917	0.152345	0.261719	0.268217	0.242722	0.361641	0.243382	0.40932	0.258135	0.415428	0.174919	0.129764	0.23518	0.0643036	0.291696	0.520856	0.242229	0.45653	0.4317	0.108227	0.374153	0.169089	0.0992644	0.407508	0.558279
	46.184	0.440284	0.227419	0.194299	0.279432	0.257267	0.278838	0.268312	0.260239	0.356639	0.104575	0.127556	0.239297	0.18642	0.104582	0.209268	0.433615	0.374529	0.335991	0.267531	0.195767	0.064184	0.318375	0.423094	0.552641	0.146793	0.256704	0.277148	0.225758	0.355127	0.233633	0.405457	0.260101	0.412092	0.18002	0.124898	0.231075	0.0594144	0.298692	0.519702	0.25081	0.459092	0.429135	0.106844	0.375815	0.175075	0.0982212	0.406635	0.555673
	46.5753	0.436471	0.21741	0.184495	0.273232	0.261055	0.270478	0.254369	0.254072	0.353528	0.106744	0.116533	0.235472	0.187259	0.101555	0.201405	0.426753	0.370457	0.325386	0.257644	0.192907	0.068185	0.319568	0.418211	0.551521	0.141495	0.251805	0.285689	0.209144	0.348068	0.224001	0.4016	0.261803	0.408872	0.184781	0.119921	0.227636	0.0580121	0.305347	0.517776	0.259455	0.46098	0.426459	0.106764	0.377017	0.182135	0.0980233	0.405664	0.553177
	46.9667	0.432552	0.207534	0.174748	0.267157	0.264694	0.262836	0.240671	0.248178	0.350558	0.108928	0.105476	0.231942	0.188313	0.0986347	0.193551	0.419615	0.366549	0.315251	0.247792	0.189868	0.0743326	0.320924	0.414037	0.550519	0.13651	0.24708	0.293765	0.192979	0.340608	0.214528	0.397794	0.263232	0.405779	0.189203	0.114874	0.224895	0.0602822	0.311638	0.515089	0.268135	0.462176	0.423653	0.107898	0.377761	0.190073	0.0986201	0.404562	0.550784
	47.3581	0.428532	0.197789	0.165057	0.261196	0.268228	0.255924	0.227288	0.24252	0.347672	0.111111	0.0943706	0.22874	0.189452	0.0958007	0.185711	0.412166	0.362793	0.305634	0.238	0.186607	0.0820247	0.322386	0.410571	0.549597	0.131833	0.242558	0.301316	0.177368	0.332898	0.20525	0.394067	0.264365	0.402804	0.193315	0.109788	0.222863	0.0658005	0.317569	0.511646	0.276778	0.462659	0.420694	0.110138	0.378063	0.198724	0.0999616	0.403292	0.548464
	47.7495	0.424418	0.188182	0.155428	0.255358	0.271661	0.249835	0.214335	0.237122	0.344847	0.113279	0.0832327	0.225897	0.190564	0.0929959	0.177865	0.404419	0.359195	0.296615	0.228313	0.183085	0.0907343	0.323967	0.407795	0.548715	0.127538	0.238297	0.308295	0.162423	0.325083	0.19622	0.390459	0.265224	0.399955	0.197131	0.104708	0.22155	0.0737853	0.323099	0.507471	0.285318	0.462413	0.417567	0.113362	0.377958	0.207928	0.102	0.401816	0.546209
	48.1409	0.42022	0.178725	0.14587	0.249631	0.275072	0.244576	0.201931	0.231938	0.342016	0.115456	0.0720943	0.223437	0.191532	0.0902103	0.170069	0.396339	0.355744	0.288228	0.218765	0.179288	0.100114	0.325612	0.405675	0.547835	0.123623	0.234333	0.314655	0.148302	0.31737	0.187488	0.386981	0.265762	0.397213	0.200678	0.0997003	0.220943	0.0834823	0.32825	0.502573	0.293722	0.461429	0.41424	0.117487	0.377473	0.217541	0.104689	0.4001	0.543987
	48.5323	0.41595	0.169439	0.136405	0.244013	0.278464	0.240186	0.190224	0.22698	0.339166	0.11766	0.0609473	0.221381	0.192261	0.0874174	0.162282	0.387934	0.352423	0.280529	0.20941	0.175193	0.109886	0.327334	0.404164	0.546917	0.120152	0.230712	0.320373	0.135161	0.309909	0.179125	0.38366	0.266005	0.394576	0.203965	0.0948099	0.22103	0.0943153	0.332986	0.496986	0.301902	0.459703	0.4107	0.122417	0.376659	0.227443	0.107987	0.398118	0.541782
	48.9237	0.411623	0.160359	0.127066	0.238503	0.281908	0.236684	0.179397	0.222221	0.336245	0.119916	0.0498626	0.219746	0.19266	0.0846087	0.154564	0.3792	0.349229	0.273547	0.200303	0.170816	0.119877	0.329109	0.403201	0.545927	0.11715	0.22748	0.32542	0.123213	0.302921	0.171208	0.380509	0.265919	0.392033	0.206993	0.0901173	0.221784	0.105879	0.33732	0.490742	0.309847	0.457241	0.406926	0.12808	0.375557	0.237506	0.111847	0.395853	0.539574
	49.3151	0.407255	0.151528	0.117908	0.23309	0.285431	0.234044	0.169639	0.217651	0.333239	0.122245	0.0388405	0.218549	0.192661	0.0817924	0.146913	0.370138	0.346129	0.267307	0.191506	0.166165	0.129965	0.330932	0.402722	0.544832	0.11465	0.224666	0.32979	0.112692	0.296562	0.16383	0.377548	0.265507	0.389572	0.209759	0.0856665	0.223174	0.117909	0.341233	0.483888	0.317474	0.45405	0.402913	0.134394	0.374231	0.247634	0.116226	0.393304	0.537343
	49.7065	0.402858	0.143002	0.109012	0.227782	0.28906	0.232289	0.16119	0.213274	0.330129	0.124646	0.0279579	0.217803	0.192218	0.0789619	0.139349	0.360781	0.343119	0.26183	0.183098	0.16127	0.140038	0.332825	0.402651	0.543605	0.11271	0.22232	0.333477	0.103851	0.291014	0.1571	0.374804	0.264774	0.387194	0.212236	0.0815215	0.225167	0.130207	0.344705	0.476489	0.324763	0.450146	0.398666	0.141256	0.372746	0.25772	0.121075	0.390484	0.535087
	50.0979	0.398446	0.134844	0.100487	0.222567	0.292844	0.231346	0.154269	0.209062	0.326891	0.127129	0.0172914	0.217518	0.191297	0.0761566	0.13193	0.351125	0.340164	0.257101	0.175152	0.156161	0.150045	0.334771	0.402916	0.542224	0.111332	0.220458	0.336485	0.0969629	0.286427	0.15113	0.372296	0.263699	0.384884	0.214412	0.077719	0.22772	0.142647	0.347736	0.468612	0.331661	0.445545	0.394197	0.14857	0.371179	0.267683	0.126343	0.387425	0.532787
	50.4892	0.394029	0.127128	0.0924883	0.217459	0.296767	0.231217	0.14911	0.205048	0.323544	0.12967	0.0072088	0.217702	0.189895	0.0733846	0.124649	0.341218	0.337249	0.253122	0.167769	0.150856	0.159899	0.336825	0.403439	0.540674	0.110584	0.219118	0.338833	0.0922222	0.282902	0.146047	0.370064	0.262321	0.382653	0.216259	0.0742849	0.230796	0.155121	0.350272	0.460352	0.338112	0.440262	0.389545	0.156203	0.369625	0.277444	0.131979	0.384173	0.530451
	50.8806	0.389615	0.119941	0.0852162	0.212458	0.300874	0.231813	0.145887	0.201208	0.320062	0.132262	0.00550779	0.218356	0.188015	0.070707	0.117595	0.331062	0.334345	0.249844	0.161034	0.145388	0.169567	0.338978	0.404147	0.538945	0.110448	0.218303	0.340537	0.0897433	0.28055	0.141966	0.368131	0.260616	0.38049	0.217767	0.0712437	0.234345	0.167554	0.352318	0.451797	0.344097	0.434313	0.384743	0.164046	0.368176	0.286939	0.137936	0.380785	0.528069
	51.272	0.385212	0.11338	0.0789333	0.207577	0.305141	0.233094	0.144718	0.197581	0.316479	0.13489	0.0148871	0.219475	0.185685	0.0681608	0.110784	0.320684	0.331421	0.247234	0.155055	0.139751	0.178991	0.341287	0.40497	0.537037	0.110965	0.218025	0.34163	0.0894694	0.279375	0.139002	0.366534	0.258626	0.378403	0.218929	0.0685825	0.238323	0.179887	0.353818	0.443059	0.349538	0.427709	0.379852	0.17198	0.366945	0.296122	0.144172	0.377325	0.525648
	51.6634	0.38083	0.107559	0.0739467	0.202833	0.309581	0.234986	0.145625	0.194174	0.31279	0.137543	0.0247335	0.221047	0.182935	0.0658161	0.104293	0.310101	0.328459	0.245222	0.149927	0.133961	0.18813	0.343769	0.405838	0.53495	0.112113	0.218278	0.342145	0.0911844	0.27941	0.137238	0.365292	0.256353	0.37639	0.219749	0.0663076	0.242678	0.192066	0.354765	0.434241	0.354434	0.420465	0.374925	0.179907	0.36603	0.304945	0.150652	0.373862	0.523189
	52.0548	0.376478	0.102607	0.0705883	0.198241	0.314195	0.237398	0.148526	0.191017	0.309023	0.140229	0.0344692	0.223051	0.179809	0.0637409	0.0982085	0.299306	0.325416	0.243733	0.145743	0.128004	0.196962	0.346455	0.406688	0.532691	0.113882	0.219036	0.342122	0.0945778	0.280579	0.136732	0.364422	0.253814	0.374448	0.220248	0.0643848	0.247356	0.204062	0.355137	0.425453	0.35872	0.412592	0.370025	0.187761	0.365537	0.313387	0.157353	0.370463	0.52069
	52.4462	0.37217	0.0986626	0.0691428	0.193837	0.318958	0.240283	0.153268	0.188159	0.305202	0.14295	0.0439943	0.225459	0.176357	0.0619987	0.0925828	0.28833	0.322274	0.242694	0.142587	0.121877	0.205438	0.349385	0.40746	0.530271	0.116254	0.220281	0.341607	0.099272	0.282816	0.137504	0.363931	0.251041	0.372583	0.220439	0.0627992	0.252301	0.215833	0.354912	0.41681	0.362391	0.404106	0.365212	0.195475	0.365555	0.321415	0.164261	0.367194	0.518163
	52.8376	0.367923	0.0958677	0.0697661	0.189641	0.323896	0.243523	0.159617	0.185618	0.30134	0.145732	0.0532845	0.228235	0.172626	0.06067	0.0875624	0.277158	0.318995	0.241999	0.140513	0.115581	0.21356	0.352552	0.408098	0.527701	0.119168	0.221956	0.340647	0.104932	0.285999	0.139527	0.363801	0.248026	0.370781	0.220354	0.0615177	0.257454	0.227362	0.354114	0.408412	0.365431	0.395027	0.360538	0.20303	0.366155	0.329012	0.171366	0.364114	0.515598
	53.229	0.363755	0.0943424	0.0724309	0.1857	0.328967	0.247082	0.167339	0.183474	0.29749	0.148589	0.0623346	0.231339	0.168684	0.0597924	0.0832157	0.265823	0.315555	0.241578	0.13956	0.109107	0.221288	0.356	0.408552	0.524994	0.122607	0.224026	0.339297	0.111259	0.289976	0.142745	0.364019	0.244819	0.369049	0.220006	0.0605094	0.26276	0.238615	0.352721	0.400372	0.367824	0.385378	0.356059	0.210394	0.367395	0.336151	0.178662	0.361281	0.51301
	53.6204	0.359684	0.0941685	0.0769324	0.18205	0.334187	0.250852	0.176168	0.181747	0.29366	0.151544	0.0710932	0.234728	0.16459	0.0594249	0.0796797	0.254337	0.311929	0.241323	0.139722	0.102479	0.22862	0.359695	0.408773	0.522164	0.126479	0.22642	0.337606	0.118011	0.294613	0.14706	0.36454	0.241409	0.367374	0.219412	0.0597584	0.268161	0.249571	0.350785	0.392784	0.369609	0.375194	0.351813	0.217552	0.369293	0.342802	0.18614	0.358745	0.510394
	54.0117	0.35573	0.0953662	0.0829692	0.178738	0.339528	0.25479	0.185878	0.18052	0.289914	0.154608	0.0795751	0.23836	0.160428	0.0595628	0.0770654	0.242731	0.308089	0.241168	0.140975	0.0957038	0.235538	0.363655	0.408724	0.519224	0.130757	0.22908	0.335638	0.125018	0.299714	0.152363	0.36533	0.237839	0.365761	0.218579	0.0592308	0.273609	0.260201	0.348309	0.385751	0.37077	0.364506	0.347847	0.224478	0.37186	0.348937	0.193779	0.356557	0.507761
	54.4031	0.351909	0.0978892	0.0902086	0.175816	0.344962	0.258831	0.19625	0.179828	0.286275	0.157777	0.0877206	0.242192	0.156286	0.0602143	0.0754294	0.231062	0.304024	0.241031	0.14325	0.0888185	0.242018	0.367845	0.408373	0.51619	0.135352	0.231941	0.333446	0.132129	0.305145	0.158526	0.366335	0.234127	0.364209	0.217496	0.0589276	0.279059	0.27047	0.345338	0.379363	0.371373	0.353354	0.344192	0.231126	0.375065	0.354509	0.201548	0.354762	0.505119
	54.7945	0.348234	0.101632	0.0983528	0.173326	0.350479	0.262916	0.2071	0.179729	0.282797	0.161049	0.0955321	0.246189	0.152266	0.0613337	0.0748651	0.219361	0.299708	0.240852	0.146465	0.0818481	0.24806	0.372236	0.407695	0.51308	0.14021	0.23493	0.331092	0.139256	0.310712	0.165425	0.367505	0.230297	0.362718	0.216164	0.0588248	0.284476	0.280351	0.341909	0.3737	0.371426	0.341778	0.340881	0.237453	0.378869	0.359488	0.2094	0.353407	0.502476
	55.1859	0.344716	0.106447	0.107145	0.171326	0.35601	0.267029	0.218281	0.180271	0.279527	0.164386	0.102982	0.25032	0.148486	0.0628741	0.0753343	0.207712	0.295141	0.240588	0.150516	0.0748245	0.253621	0.376808	0.406677	0.50991	0.14527	0.237995	0.328636	0.146319	0.316275	0.172938	0.368796	0.226407	0.361305	0.214564	0.0589237	0.289834	0.289802	0.338048	0.368841	0.370984	0.329816	0.337946	0.243377	0.383205	0.363826	0.217279	0.352531	0.499854
	55.5773	0.34136	0.112171	0.116381	0.16985	0.361546	0.271105	0.229649	0.181473	0.276502	0.167767	0.110046	0.25456	0.145065	0.0647696	0.0768152	0.19616	0.290308	0.240189	0.155289	0.0677845	0.258702	0.381492	0.405315	0.5067	0.150455	0.24106	0.326133	0.153269	0.321676	0.180952	0.370155	0.222469	0.359972	0.212696	0.0592154	0.295109	0.298795	0.333818	0.364836	0.370091	0.317504	0.335411	0.248836	0.387997	0.367495	0.225117	0.35217	0.49726
	55.9687	0.338172	0.118641	0.125896	0.168947	0.367011	0.275161	0.241113	0.183381	0.273787	0.171146	0.116745	0.258889	0.142133	0.0669364	0.0792245	0.184784	0.285207	0.239646	0.160676	0.0607452	0.263265	0.386277	0.403615	0.503474	0.155737	0.244085	0.323641	0.160077	0.326764	0.18937	0.371552	0.218566	0.358745	0.210556	0.0596866	0.300293	0.307293	0.329232	0.361736	0.368776	0.304875	0.333305	0.253751	0.393162	0.370466	0.232849	0.352352	0.49472
	56.3601	0.335156	0.125708	0.13556	0.168637	0.372373	0.279141	0.25257	0.185973	0.271401	0.174489	0.123042	0.263289	0.139803	0.0693107	0.0824209	0.173654	0.279844	0.238922	0.16656	0.0537477	0.267293	0.391082	0.401591	0.500251	0.161031	0.24701	0.321206	0.16671	0.331429	0.1981	0.372942	0.21472	0.357633	0.208158	0.0603413	0.30537	0.315271	0.324363	0.359552	0.367113	0.291963	0.33164	0.258059	0.398604	0.372718	0.240414	0.353094	0.492243
	56.7515	0.332313	0.133245	0.145268	0.168943	0.377586	0.283059	0.263956	0.189271	0.269406	0.177769	0.128982	0.267747	0.138184	0.0717977	0.0863222	0.162832	0.274213	0.238024	0.172845	0.0468136	0.270775	0.395882	0.399269	0.497056	0.166325	0.2498	0.318878	0.173171	0.335519	0.207069	0.3743	0.211006	0.356659	0.205528	0.0611592	0.310335	0.322705	0.319241	0.35829	0.365119	0.278796	0.330435	0.26172	0.404238	0.374248	0.247764	0.354398	0.489848
	57.1429	0.32965	0.141145	0.154933	0.169869	0.38259	0.286893	0.275205	0.193229	0.267815	0.180959	0.134543	0.272246	0.137352	0.0743459	0.0907629	0.152423	0.268334	0.236937	0.179426	0.0400106	0.27368	0.400611	0.396677	0.493909	0.171557	0.252416	0.316688	0.17944	0.338964	0.216206	0.37559	0.207475	0.35584	0.202691	0.0621541	0.315176	0.329572	0.313933	0.35792	0.362876	0.265406	0.329687	0.264695	0.409965	0.375047	0.254863	0.35625	0.487548
	57.5342	0.327169	0.149318	0.164484	0.171401	0.387373	0.290623	0.286259	0.197826	0.266662	0.184056	0.139754	0.276769	0.137356	0.0768735	0.095655	0.142503	0.262205	0.235667	0.186223	0.033444	0.27602	0.405211	0.393852	0.490831	0.176704	0.254825	0.314668	0.185525	0.341647	0.225451	0.376778	0.204173	0.355187	0.199697	0.0633244	0.319881	0.335867	0.308508	0.358393	0.360417	0.251828	0.329388	0.266989	0.415698	0.375123	0.261694	0.358617	0.485345
	57.9256	0.324874	0.157687	0.173857	0.173523	0.391867	0.294259	0.297076	0.203008	0.265962	0.187051	0.144627	0.281297	0.138208	0.0793398	0.100894	0.13321	0.255854	0.234226	0.193153	0.0273483	0.277768	0.409641	0.390833	0.487839	0.18174	0.25701	0.312836	0.19142	0.343513	0.234745	0.377832	0.201177	0.354723	0.196583	0.0646902	0.324435	0.341566	0.303023	0.35964	0.357811	0.238099	0.329519	0.268594	0.421343	0.374477	0.268247	0.361452	0.483253
	58.317	0.322769	0.166183	0.182998	0.17619	0.396066	0.297755	0.307599	0.208709	0.26571	0.189953	0.149151	0.285808	0.139879	0.0816937	0.106371	0.124683	0.249292	0.232613	0.200144	0.0222205	0.278942	0.413812	0.387663	0.484943	0.186617	0.258941	0.311198	0.197122	0.344509	0.244034	0.378702	0.198508	0.354448	0.193398	0.0662808	0.328817	0.346669	0.297584	0.361566	0.355125	0.224265	0.33004	0.269524	0.426804	0.373113	0.27452	0.364688	0.481262
	58.7084	0.32085	0.174744	0.191857	0.179363	0.399921	0.301133	0.3178	0.214882	0.265922	0.192764	0.153364	0.290279	0.142312	0.0839004	0.112049	0.1171	0.242545	0.230866	0.207135	0.0190014	0.279534	0.417691	0.384388	0.482155	0.191336	0.260616	0.309758	0.202637	0.344585	0.253269	0.379352	0.196244	0.354381	0.190181	0.0681127	0.33301	0.351157	0.292247	0.364073	0.352401	0.210369	0.33091	0.269787	0.43199	0.371031	0.28051	0.368247	0.479382
	59.0998	0.319115	0.183311	0.200384	0.182977	0.403403	0.304344	0.327628	0.22143	0.26656	0.195481	0.157236	0.294689	0.145411	0.0859444	0.117824	0.110673	0.235649	0.228993	0.214062	0.0188721	0.279548	0.421184	0.381052	0.479476	0.195833	0.262016	0.3085	0.207946	0.343747	0.262394	0.379729	0.194401	0.354521	0.186967	0.0702228	0.336991	0.35502	0.287127	0.367038	0.349731	0.196465	0.332065	0.269374	0.436797	0.368221	0.286202	0.372042	0.4776
	59.4912	0.317551	0.191828	0.208538	0.186972	0.406492	0.307401	0.337058	0.228305	0.267629	0.198099	0.160802	0.299018	0.14907	0.0877963	0.123678	0.105593	0.228629	0.227048	0.220882	0.0220156	0.278999	0.424245	0.377706	0.476907	0.200112	0.263146	0.307409	0.213053	0.341957	0.271368	0.379792	0.193029	0.354879	0.183793	0.0726091	0.340746	0.358245	0.282289	0.37035	0.34714	0.182607	0.333448	0.268284	0.441135	0.364681	0.291573	0.375982	0.475917
	59.8826	0.316146	0.200243	0.216275	0.19128	0.409128	0.310285	0.346058	0.235407	0.26908	0.200593	0.164047	0.303251	0.153161	0.0894665	0.129552	0.102063	0.221539	0.225064	0.227543	0.0274375	0.277873	0.426801	0.374398	0.474445	0.204119	0.264011	0.306454	0.217938	0.339252	0.280143	0.3795	0.192156	0.355459	0.180681	0.0752737	0.34426	0.360811	0.277823	0.373885	0.344705	0.168848	0.334985	0.26648	0.4449	0.360394	0.296581	0.379975	0.474328
	60.274	0.314881	0.20851	0.223561	0.195825	0.411309	0.312979	0.354604	0.242677	0.270891	0.202944	0.166988	0.307378	0.157559	0.0909349	0.135403	0.100194	0.214415	0.2231	0.23401	0.0341352	0.276195	0.428789	0.371181	0.472085	0.207834	0.26462	0.305603	0.222591	0.335618	0.288684	0.378819	0.191789	0.356265	0.177669	0.0781893	0.347524	0.362711	0.2738	0.377529	0.342446	0.155248	0.336613	0.263948	0.448009	0.355361	0.301179	0.383938	0.472825
	60.6654	0.313736	0.216587	0.23036	0.200542	0.41297	0.315505	0.362687	0.250038	0.273023	0.205113	0.169648	0.311394	0.162139	0.0922204	0.14123	0.100024	0.207319	0.22122	0.240248	0.0415639	0.273949	0.430173	0.368106	0.469821	0.21124	0.265002	0.304817	0.227	0.331087	0.296957	0.377732	0.191962	0.357308	0.174781	0.081307	0.350536	0.363923	0.270263	0.38118	0.340396	0.141863	0.338268	0.260652	0.450377	0.349576	0.30531	0.387794	0.471414
	61.0568	0.312691	0.224443	0.236648	0.20535	0.414103	0.317827	0.370286	0.25741	0.275425	0.207074	0.172024	0.3153	0.166784	0.0933189	0.14697	0.101492	0.200304	0.219478	0.246228	0.049434	0.271151	0.430884	0.365224	0.467643	0.214291	0.265176	0.304048	0.231141	0.325684	0.304936	0.37622	0.192645	0.358584	0.172061	0.0845827	0.353292	0.364445	0.267277	0.384734	0.338575	0.128762	0.339894	0.256578	0.451935	0.343048	0.308921	0.391474	0.470083
	61.4481	0.311725	0.23205	0.242403	0.21019	0.41467	0.319983	0.377409	0.264744	0.278068	0.208802	0.174173	0.319097	0.171396	0.0942439	0.152646	0.104423	0.193435	0.217957	0.251929	0.0576195	0.267807	0.430918	0.362586	0.465546	0.217003	0.265192	0.303253	0.23501	0.31942	0.312602	0.374294	0.193858	0.360106	0.169549	0.0879423	0.355797	0.364271	0.264839	0.388113	0.336959	0.11602	0.341449	0.251729	0.452634	0.335797	0.311971	0.394921	0.468838
	61.8395	0.310821	0.239386	0.247608	0.214988	0.414644	0.321941	0.384043	0.271951	0.280886	0.210278	0.17609	0.322788	0.175878	0.0950127	0.158211	0.108628	0.186784	0.216705	0.257325	0.0660414	0.263918	0.430226	0.360239	0.463521	0.219333	0.265084	0.302377	0.238576	0.312357	0.319936	0.371953	0.195556	0.36187	0.167295	0.091339	0.358049	0.363403	0.262984	0.391233	0.335564	0.103737	0.342889	0.24611	0.452432	0.327845	0.314431	0.398086	0.467672
	62.2309	0.309962	0.246436	0.252254	0.219684	0.41403	0.323721	0.390194	0.278998	0.283853	0.211507	0.177833	0.326373	0.18016	0.0956311	0.163669	0.113863	0.180413	0.215797	0.262405	0.0746687	0.259516	0.428813	0.358223	0.46156	0.221302	0.264908	0.301372	0.241835	0.304507	0.326929	0.369217	0.197722	0.363875	0.165356	0.0947122	0.360047	0.361853	0.261683	0.394032	0.33433	0.0920438	0.344195	0.23977	0.451313	0.319236	0.31629	0.400925	0.466583
	62.6223	0.309132	0.253183	0.256331	0.224219	0.41279	0.325313	0.395862	0.285804	0.286901	0.212487	0.179415	0.329848	0.18417	0.0961369	0.169019	0.11992	0.174407	0.215275	0.267147	0.0834836	0.254601	0.426671	0.356573	0.459656	0.222894	0.264718	0.300185	0.244764	0.295948	0.333563	0.366101	0.200313	0.366116	0.16378	0.0980179	0.361783	0.359629	0.260923	0.396447	0.333248	0.0811251	0.345341	0.232745	0.449263	0.310004	0.317553	0.403399	0.465568
	63.0137	0.308314	0.259613	0.259838	0.228534	0.410951	0.326697	0.40104	0.292334	0.289993	0.213245	0.180863	0.333208	0.187851	0.0965394	0.174227	0.126615	0.16883	0.215183	0.27154	0.0924673	0.249218	0.423797	0.355313	0.457799	0.224112	0.264566	0.298765	0.247344	0.286725	0.339829	0.362618	0.203269	0.368577	0.162626	0.101224	0.363246	0.356756	0.26067	0.398422	0.332257	0.0712434	0.346314	0.225101	0.446284	0.300202	0.318235	0.405472	0.464616
	63.4051	0.307493	0.265711	0.262771	0.232584	0.408488	0.327887	0.405736	0.298536	0.293079	0.213794	0.182216	0.336439	0.191147	0.096889	0.179331	0.133775	0.163764	0.215555	0.275572	0.101616	0.24338	0.420222	0.354458	0.455979	0.224976	0.264518	0.297065	0.249565	0.276917	0.345711	0.358789	0.206554	0.371248	0.161928	0.104284	0.36442	0.353244	0.260865	0.399911	0.331312	0.06276	0.347102	0.216888	0.442384	0.289872	0.318355	0.407107	0.463726
	63.7965	0.306649	0.271458	0.265131	0.236314	0.405421	0.328834	0.409936	0.304357	0.296104	0.214155	0.183462	0.339526	0.194004	0.0972115	0.184284	0.141289	0.159274	0.216398	0.279227	0.110898	0.237127	0.415936	0.354009	0.454184	0.225461	0.264617	0.295036	0.251398	0.266615	0.351193	0.354613	0.210079	0.3741	0.161724	0.107177	0.365283	0.349118	0.261476	0.400861	0.330372	0.0561452	0.347691	0.208156	0.43757	0.27906	0.317928	0.40827	0.462878
	64.1879	0.305764	0.276838	0.26692	0.239691	0.401752	0.329557	0.413648	0.309777	0.299041	0.214341	0.184648	0.342453	0.196377	0.0975587	0.189119	0.149025	0.155424	0.21773	0.282501	0.1203	0.230494	0.410992	0.353959	0.452401	0.225603	0.264927	0.292639	0.252835	0.255889	0.356259	0.350109	0.213807	0.377115	0.162029	0.109852	0.365814	0.344393	0.262416	0.401242	0.329363	0.0519091	0.348076	0.198952	0.431858	0.267815	0.31696	0.408931	0.462073
	64.5793	0.304815	0.281835	0.268137	0.242669	0.397473	0.330009	0.416863	0.314737	0.301827	0.214351	0.185751	0.345204	0.198214	0.0979785	0.193821	0.156901	0.152273	0.219527	0.285377	0.129777	0.223502	0.405395	0.354287	0.450616	0.225371	0.265484	0.289835	0.253849	0.244867	0.36089	0.345276	0.21765	0.380258	0.162842	0.11227	0.36599	0.339084	0.263649	0.401012	0.328261	0.0504113	0.348243	0.189294	0.425257	0.256179	0.315444	0.409067	0.461295
	64.9706	0.303784	0.286434	0.26879	0.245219	0.392614	0.330193	0.419586	0.319232	0.304446	0.214186	0.1868	0.347766	0.19948	0.0985136	0.198386	0.164829	0.149852	0.221786	0.287858	0.139295	0.216203	0.399195	0.354963	0.448816	0.224788	0.266336	0.286594	0.254431	0.233619	0.365076	0.340127	0.221555	0.383504	0.164151	0.114376	0.365794	0.333215	0.265087	0.400153	0.326982	0.051636	0.348192	0.179218	0.417791	0.24421	0.313362	0.408664	0.460539
	65.362	0.302649	0.290625	0.268885	0.247311	0.387149	0.330096	0.421823	0.323217	0.306847	0.213828	0.187788	0.350129	0.200139	0.0992253	0.202841	0.172725	0.148196	0.224468	0.289932	0.148813	0.208606	0.392437	0.355947	0.446985	0.223845	0.267515	0.28289	0.254566	0.222273	0.368804	0.334676	0.225461	0.386822	0.165923	0.116109	0.365209	0.326795	0.266676	0.398648	0.325495	0.0551484	0.347917	0.168734	0.409478	0.231961	0.310688	0.407721	0.459799
	65.7534	0.301394	0.294401	0.268435	0.248918	0.381114	0.329695	0.423577	0.326682	0.309015	0.21327	0.188716	0.352287	0.200171	0.100142	0.207152	0.180542	0.147297	0.227542	0.291603	0.158285	0.20076	0.385165	0.357196	0.445112	0.222538	0.26904	0.278706	0.254239	0.210917	0.372071	0.328941	0.229298	0.39018	0.168122	0.117421	0.364226	0.319854	0.268345	0.396492	0.323733	0.0603137	0.347428	0.157875	0.400355	0.21951	0.307396	0.406249	0.459069
	66.1448	0.300007	0.297761	0.267455	0.250026	0.374496	0.329013	0.424872	0.329613	0.310923	0.212498	0.189607	0.354239	0.19957	0.10132	0.211365	0.188204	0.147152	0.23097	0.292871	0.167685	0.192685	0.377467	0.358658	0.443188	0.220891	0.270939	0.274032	0.253456	0.199657	0.374877	0.322957	0.233035	0.393556	0.170693	0.118245	0.362839	0.312408	0.270016	0.393698	0.32164	0.0665339	0.346738	0.146676	0.39047	0.206943	0.303468	0.404275	0.458355
	66.5362	0.298475	0.300707	0.265967	0.250613	0.367316	0.328015	0.425708	0.331988	0.312547	0.21151	0.190436	0.355986	0.198337	0.102773	0.215449	0.195688	0.147719	0.234696	0.293737	0.176971	0.184416	0.369393	0.36028	0.441205	0.218885	0.273205	0.268859	0.252203	0.188608	0.377225	0.31675	0.2366	0.396915	0.17359	0.118547	0.361044	0.304493	0.27164	0.390275	0.319176	0.0733475	0.34587	0.135181	0.379878	0.194368	0.298897	0.40184	0.457647
	66.9276	0.296795	0.303247	0.263996	0.250675	0.359595	0.326737	0.426115	0.333821	0.31389	0.210318	0.191243	0.357526	0.196495	0.104532	0.219431	0.202952	0.14895	0.238683	0.294212	0.186128	0.175996	0.361062	0.362008	0.43916	0.216566	0.275851	0.263196	0.250498	0.177855	0.379127	0.310371	0.239978	0.400238	0.176756	0.118284	0.358842	0.296143	0.273126	0.386256	0.316264	0.0804348	0.344861	0.123468	0.368663	0.181924	0.293693	0.398994	0.456957
	67.319	0.294961	0.305385	0.261568	0.250199	0.351337	0.325153	0.426098	0.335086	0.31492	0.208933	0.191998	0.358858	0.194066	0.106599	0.223315	0.209978	0.150782	0.242859	0.294295	0.195131	0.167448	0.352551	0.363783	0.437051	0.213925	0.278853	0.257047	0.24834	0.167533	0.380591	0.303854	0.243113	0.403493	0.180142	0.117435	0.356228	0.287395	0.274439	0.381665	0.312885	0.0875763	0.343746	0.1116	0.356907	0.169766	0.287884	0.395795	0.456276
	67.7104	0.292971	0.30713	0.258717	0.249185	0.342594	0.323278	0.425675	0.33581	0.315651	0.207392	0.192725	0.359976	0.19109	0.10897	0.227087	0.216763	0.153136	0.247182	0.293998	0.203965	0.158836	0.34398	0.36555	0.434879	0.211	0.282197	0.25043	0.245747	0.157726	0.381633	0.297245	0.245985	0.406655	0.183707	0.115993	0.353201	0.2783	0.275499	0.376537	0.308972	0.0946227	0.342576	0.0996742	0.34472	0.158093	0.28151	0.392305	0.455609
	68.1018	0.290824	0.308487	0.25547	0.247635	0.333366	0.321114	0.424859	0.335981	0.316064	0.205718	0.193411	0.360868	0.187604	0.111639	0.230787	0.223287	0.155943	0.251576	0.293324	0.212616	0.150189	0.335463	0.367252	0.432647	0.207812	0.285853	0.243367	0.242737	0.148569	0.382261	0.290582	0.248566	0.409696	0.187404	0.113944	0.349753	0.268897	0.276273	0.370907	0.304512	0.101469	0.341392	0.087773	0.332211	0.147128	0.274618	0.388585	0.454952
[truncated: 183 more rows]
[truncated: 24 more columns]
