# Supplementary material for: Deciphering the actin structure-dependent preferential cooperative binding of cofilin
Source: eLife. 2024 Aug 2;13:RP95257. doi: 10.7554/eLife.95257 (PMC11296705; doi:10.7554/eLife.95257)
Supplement: Figure 8—source data 1. — These data are presented as origin plots in Figure 8A–D. [file elife-95257-fig8-data1.xlsx]

## Sheet: Figure 8
Figure 8A	Time(s)	P1 (nm)	P2 (nm)	P3 (nm)	P4 (nm)	P5 (nm)	P6 (nm)		Time(s)	P1-P2 (nm)	P2-P3 (nm)	P3-P4 (nm)	P4-P5 (nm)	P5-P6 (nm)		Histograms	Height(nm)	HHP(nm)	N(peak height)	N(HHP)	Single Gaussian fit to Height				Figure 8B	Time (s)	P1 (nm)	P2 (nm)	P3 (nm)	P4 (nm)	P5 (nm)	P6 (nm)		Time (s)	P1-P2 (nm)	P2-P3 (nm)	P3-P4 (nm)	P4-P5 (nm)	P5-P6 (nm)		Histograms	Height(nm)	HHP(nm)			Mean height(nm)	SD (nm)	Proportion(%)	N(peak height)
	3391	8.02	8.715	7.87	7.82	7.66	7.31		3391	32.9658	32.9541	36.286	32.866	35.4374			8.98	39.3121	1930	1556	Mean	SD	Area			57	8.24	8.99	8.2	8.85	9.34	9.49		57	40.9251	36.8559	37.088	32.19	36.6394			8.24	40.9251		peak1	9.1625	0.403975	47.0045	2212
	3391.5	7.33	7.955	6.98	6.9	6.71	6.66		3391.5	34.0629	36.7492	31.8771	32.8498	35.6773			9.06	33.9526			---------------------------------------------					57.5	8.3	8.56	8.6	9.07	9.33	9.38		57.5	33.0125	38.7831	35.6839	36.2859	32.9912			8.3	33.0125		peak2	10.535	0.68535	52.9955
	3392	7.33	7.685	6.72	6.7	6.55	6.67		3392	34.6983	37.1638	31.8716	33.9138	33.7504			9.23	35.9896			8.24709	0.7962	974.978			58	7.99	8.58	8.29	8.84	8.98	9.2		58	35.639	36.1055	39.6755	34.5519	41.1745			7.99	35.639
	3392.5	7.79	8.735	7.79	7.25	7.19	7.295		3392.5	28.4297	37.6768	32.4304	35.4908	32.8423			9.28	34.8879								58.5	8.15	8.7	8.6	9.02	9.51	9.41		58.5	35.0372	39.6386	40.9278	32.9003	37.8334			8.15	35.0372
	3393	7.64	8.805	7.425	7.28	7.2	7.47		3393	31.8868	38.7817	30.9278	36.9536	31.5748			7.48	34.6001			Single Gaussian fit to HHP					59	8.62	8.79	8.75	9.23	9.26	9.51		59	39.0991	38.311	34.2291	35.0142	35.7806			8.62	39.0991			Mean HHP(nm)	SD	Proportion(%)	N(HHP)
	3393.5	7.56	8.52	6.95	7.11	6.85	7		3393.5	28.1236	38.3722	31.8659	36.9744	30.4183			8.47	34.8845			Mean	SD	Area			59.5	8.94	9.29	9.37	9.44	9.67	9.82		59.5	32.4959	39.5943	36.9558	38.2811	33.3507			8.94	32.4959		peak1	28.51	3.00815	55.1403	1780
	3394	7.13	8.035	6.85	6.83	6.35	6.64		3394	28.6003	37.0144	32.8233	35.797	31.8139			8.47	34.8505			---------------------------------------------					60	8.38	8.4	8.89	9.09	9.07	9.39		60	32.1156	35.4675	36.9354	42.4036	30.4475			8.38	32.1156		peak2	37.399	3.5896	44.8597
	3394.5	7.695	8.44	7.24	7.18	7.38	7.23		3394.5	28.4372	38.1395	32.8856	36.3784	31.5867			8.04	34.2435			34.3494	2.62553	3162.31			60.5	8.49	9.23	8.91	9.01	9.32	9.47		60.5	32.5623	33.6873	40.9146	37.4953	33.8038			8.49	32.5623
	3395	7.56	8.83	7.255	7.05	6.82	7.28		3395	28.5945	38.2975	31.4183	37.8335	30.4202			7.97	34.4111								61	8.68	9.12	8.81	9.21	8.89	9.65		61	35.7969	36.256	37.5794	35.7747	38.3384			8.68	35.7969
	3395.5	8.08	8.95	7.64	7.58	7.11	7.27		3395.5	28.8954	38.2967	32.3511	36.8626	31.591			7.6	34.2165								61.5	8.1	8.93	8.95	9.16	8.62	9.51		61.5	37.614	36.9685	34.3698	39.5984	36.282			8.1	37.614
	3396	7.44	8.46	7.095	6.81	7.01	6.87		3396	31.8772	38.2244	32.339	31.8634	35.6856			7.84	32.9737								62	8.93	9.19	8.62	9.23	9.29	10.21		62	36.2914	34.8987	39.0798	34.9471	37.0364			8.93	36.2914
	3396.5	8.55	9.075	8.025	7.92	7.83	7.66		3396.5	32.4819	37.2607	31.9034	35.8827	31.6073			7.04	33.4747								62.5	8.13	8.51	8.81	9.07	8.71	9.95		62.5	28.8199	40.2291	39.6099	33.6873	31.6602			8.13	28.8199
	3397	7.92	8.915	7.925	7.81	7.58	7.76		3397	33.1309	34.395	34.3209	36.8733	31.5694			7.29	33.7644								63	8.42	9.02	9.14	8.89	9.01	10.34		63	34.9626	37.003	43.6656	35.5206	29.2185			8.42	34.9626
	3397.5	7.485	8.05	7.505	7.4	7.29	7.13		3397.5	34.3996	34.8094	34.3309	34.9031	31.3815			7.05	34.8527								63.5	8.03	8.42	8.63	8.89	8.98	9.48		63.5	36.9357	34.2343	38.9343	31.7329	39.0095			8.03	36.9357
	3398	6.87	8.345	7.285	7.02	7.15	7		3398	27.8279	38.0238	31.8473	36.8931	31.5923			6.83	34.5624								64	8.5	8.68	8.89	9.03	9.04	9.85		64	33.321	37.5996	36.8885	33.7112	39.5217			8.5	33.321
	3398.5	8.31	9.08	8.18	7.84	7.8	7.6		3398.5	27.9467	38.3304	32.3495	33.85	33.5018			7.52	32.9972								64.5	8.42	8.63	9.05	9.21	9.2	9.54		64.5	33.6763	37.6378	36.2752	37.5516	34.9883			8.42	33.6763
	3399	8.07	8.89	7.8	7.25	7.46	7.155		3399	29.4166	35.7803	33.8191	35.91	33.2507			9.07	31.8912								65	8.57	8.51	8.88	9.4	9.45	10.21		65	35.7768	36.875	36.3044	39.5654	32.4001			8.57	35.7768
	3399.5	8.29	9.38	8.18	8.08	7.75	7.74		3399.5	28.765	37.8284	32.3165	36.8757	31.3739			9.74	32.0372								65.5	7.82	8.26	8.55	9	8.66	9.47		65.5	34.5782	36.9623	36.8079	40.3059	30.9452			7.82	34.5782
	3400	7.53	8.49	7.2	7.09	6.82	7.19		3400	32.0435	36.8418	33.7863	35.8852	30.4359			9.73	31.4195								66	8.72	8.75	8.76	8.97	9.24	10.11		66	32.5332	38.8608	35.5522	40.8586	29.6892			8.72	32.5332
	3400.5	7.99	8.835	7.76	7.55	6.97	7.145		3400.5	32.0325	36.8524	33.7717	35.8279	33.053			8.59	32.6736								66.5	8.62	8.88	8.9	9.33	9.19	9.99		66.5	34.5828	34.2428	37.566	36.9902	37.0934			8.62	34.5828
	3401	7.03	8.05	6.53	6.445	6.2	6.13		3401	29.0735	35.6746	34.293	36.4163	33.3105			8.52	32.9658								67	8.63	9.13	8.81	9.13	9.17	9.99		67	32.5083	31.6035	41.6009	31.6475	40.4066			8.63	32.5083
	3401.5	7.96	9.19	8.1	7.715	7.75	7.265		3401.5	29.0752	38.7194	32.3302	36.4259	29.5895			7.83	34.0629								67.5	8.64	9.16	9.31	9.75	9.42	10.67		67.5	28.8534	37.5911	36.8884	40.7218	29.1703			8.64	28.8534
	3402	7.01	8.345	7.6	7.24	6.44	6.57		3402	32.2119	37.753	32.8549	31.7995	36.6403			7.83	34.6983								68	9.05	9.08	9.25	9.27	9.66	10.34		68	27.8927	39.1164	43.7244	36.2257	28.749			9.05	27.8927
	3402.5	8.34	9.46	8.63	8.365	8.13	7.68		3402.5	32.6828	37.1267	33.3256	34.3894	32.5052			8.29	28.4297								68.5	8.61	8.57	9	9.27	9.57	10.61		68.5	34.2057	35.5535	38.2145	39.6965	25.7477			8.61	34.2057
	3403	8.62	9.28	8.21	7.76	7.58	7.56		3403	33.5831	36.1409	32.8333	31.8845	35.4451			8.14	31.8868								69	9.18	9.11	9.53	9.7	9.67	10.91		69	33.7177	35.5332	40.9278	34.5613	31.6336			9.18	33.7177
	3403.5	8.46	9.28	7.81	7.71	7.58	7.63		3403.5	31.7147	35.8769	33.2884	32.8579	35.4568			8.06	28.1236								69.5	9.09	8.26	8.48	8.94	9.05	9.11		69.5	31.2484	40.919	35.0449	34.5111	36.1484			9.09	31.2484
	3404	8.86	9.81	8.31	8.21	7.84	7.63		3404	30.7844	37.2504	32.8468	35.8951	31.3682			7.63	28.6003								70	8.6	8.75	8.44	8.78	9.34	10.42		70	31.6197	34.214	34.9241	42.2567	27.6653			8.6	31.6197
	3404.5	8.69	9.56	8.295	8.12	7.9	7.57		3404.5	30.9233	35.2888	34.8093	32.3566	35.4549			8.195	28.4372								70.5	9.64	9.39	9.5	9.58	9.89	11.44		70.5	33.6148	40.1553	30.4475	41.6644	28.8703			9.64	33.6148
	3405	8.76	9.39	8.17	7.94	7.75	8.03		3405	31.7215	38.2236	32.8799	32.8799	34.7053			8.06	28.5945								71	8.33	8.73	9.39	9.9	9.64	11.14		71	35.4852	33.5547	39.596	30.3934	35.7462			8.33	35.4852
	3405.5	8.83	9.475	8.56	8.58	8.09	7.88		3405.5	32.1713	35.7984	34.7954	34.8246	32.5504			8.58	28.8954								71.5	9.27	8.35	8.79	9.72	9.4	10.92		71.5	34.393	35.6772	40.8486	36.3089	27.5283			9.27	34.393
	3406	9.06	9.62	8.375	8.095	7.89	7.98		3406	28.9461	38.1516	32.8022	31.9148	35.4549			7.94	31.8772								72	9.24	10.03	9.54	9.83	9.7	11.35		72	26.8268	42.0456	41.6741	32.5124	33.6437			9.24	26.8268
	3406.5	8.57	9.46	8.41	8.36	7.76	7.72		3406.5	28.9481	38.2298	31.8091	31.8771	35.6521			9.05	32.4819								72.5	9.77	10.03	9.42	9.98	10.3	10.47		72.5	29.0693	36.3075	40.8882	35.4401	31.7228			9.77	29.0693
	3407	8.77	9.93	8.57	8.41	7.86	8.14		3407	27.5184	37.3346	32.8134	35.8844	32.5592			8.42	33.1309								73	9.52	10.73	9.61	9.02	10.39	10.84		73	26.2368	42.9562	37.6685	32.3514	31.7866			9.52	26.2368
	3407.5	8.78	9.715	8.41	7.75	7.55	7.94		3407.5	29.6969	35.3775	33.8361	32.9294	34.8256			7.985	34.3996								73.5	9.78	10.14	9.43	9.52	10.29	10.46		73.5	29.5276	39.6	39.0543	33.7346	27.4939			9.78	29.5276
	3408	8.78	9.635	8.55	8.04	7.8	7.85		3408	29.8817	36.6925	32.877	35.8918	32.5495			7.37	27.8279								74	9.39	10.2	9.64	9.96	10.37	11.47		74	28.2957	38.2686	32.9188	43.225	26.5845			9.39	28.2957
	3408.5	8.705	9.97	8.54	8.18	8.2	7.71		3408.5	28.7484	37.3363	33.815	31.964	35.4373			8.81	27.9467								74.5	9.36	10.13	9.18	9.66	9.92	11.31		74.5	26.2084	38.8516	40.9756	36.3087	25.8891			9.36	26.2084
	3409	8.46	9.24	8.19	7.8	7.34	7.17		3409	32.8402	34.0194	32.8038	33.7981	33.719			8.57	29.4166								75	8.78	9.81	9.08	9.42	8.86	10.34		75	26.2368	36.3304	38.2481	40.7471	22.2269			8.78	26.2368
																	8.79	28.765								75.5	9.46	10.09	8.89	9.5	9.17	10.01		75.5	27.4677	31.593	45.7114	32.8719	27.9245			9.46	27.4677
																	8.03	32.0435								76	9.07	9.99	8.02	9.57	9.56	10.85		76	28.815	32.01	41.6533	31.2534	34.5256			9.07	28.815
																	8.49	32.0325								76.5	9.52	10.86	10.3	10.06	10.4	11.5		76.5	23.5197	38.2897	38.309	38.976	23.7229			9.52	23.5197
																	7.53	29.0735								77	9.76	9.86	9.88	10.16	10.06	11.1		77	27.0461	36.3219	38.2547	39.6393	25.8157			9.76	27.0461
																	8.46	29.0752								77.5	9.66	10.2	9.6	9.16	9.15	10.92		77.5	30.8388	34.9333	36.4886	40.9288	23.02			9.66	30.8388
																	7.51	32.2119								78	9.54	10.08	9.46	9.74	9.52	11.68		78	26.8328	38.3802	39.5591	35.8181	25.4522			9.54	26.8328
																	8.84	32.6828								78.5	9.35	10.16	9.55	9.79	10	11.43		78.5	26.2189	36.9488	39.9034	32.3448	29.9584			9.35	26.2189
																	9.12	33.5831								79	9.07	9.01	8.99	8.42	9.52	9.79		79	23.7689	35.6654	37.6603	39.0242	29.8865			9.07	23.7689
																	8.96	31.7147								79.5	9.24	8.67	9.1	9.75	9.55	10.34		79.5	31.0362	36.3933	34.8868	37.5217	29.1144			9.24	31.0362
																	9.36	30.7844								80	9.31	9.63	9.17	9.76	9.92	11.01		80	31.7919	32.8839	39.6031	36.2765	25.5496			9.31	31.7919
																	9.19	30.9233								80.5	9.39	9.98	9.19	9.73	10.08	10.63		80.5	27.6141	32.8839	36.9086	35.0218	31.1021			9.39	27.6141
																	9.26	31.7215								81	8.37	9.74	8.44	9.19	9.35	11.1		81	27.5074	34.891	38.3481	30.8811	32.1556			8.37	27.5074
																	9.33	32.1713								81.5	8.3	8.84	8.3	8.66	8.51	10.24		81.5	29.919	36.862	39.6352	35.6468	26.2897			8.3	29.919
																	9.56	28.9461								82	8.29	8.85	8.11	8.65	8.98	10.35		82	27.0792	37.6276	34.2526	34.8663	32.0377			8.29	27.0792
																	9.07	28.9481								82.5	8.88	9.74	8.54	9.66	10.22	10.6		82.5	26.1047	38.6141	32.9224	38.349	31.1108			8.88	26.1047
																	9.27	27.5184								83	8.47	8.23	8.6	8.78	9.13	10.16		83	28.3844	37.7755	39.095	31.6438	30.432			8.47	28.3844
																	9.28	29.6969								83.5	8.46	8.6	9.15	8.82	9.11	9.38		83.5	33.2143	28.8766	38.3338	35.0372	26.5629			8.46	33.2143
																	9.28	29.8817								84	8.3	8.99	9.23	8.09	9.1	10.36		84	27.0042	28.9156	40.3339	37.0017	26.853			8.3	27.0042
																	9.205	28.7484								84.5	8.8	9.41	9.76	8.44	9.47	10.93		84.5	31.8229	28.1931	38.1562	37.7222	25.6699			8.8	31.8229
																	8.96	32.8402								85	9.16	9.2	9.44	8.43	9.03	11.05		85	25.7704	30.7733	34.2798	38.8804	26.8938			9.16	25.7704
																	9.1	38.3431								85.5	8.54	9.08	9.69	10.21	9.91	10.76		85.5	27.0501	25.4868	32.8019	38.3908	30.207			8.54	27.0501
																	8.94	35.9295								86	8.82	8.68	8.79	8.85	9.93	10.64		86	29.6306	28.8307	28.2877	43.7116	29.5382			8.82	29.6306
																	9.42	36.8877								86.5	8.51	9.15	9.52	9.16	9.3	10.98		86.5	22.8458	34.8777	28.6891	44.977	26.2471			8.51	22.8458
																	9.28	38.0797								87	8.42	9.41	9.31	9.75	9.29	10.98		87	26.2266	33.298	27.4664	35.0938	35.5054			8.42	26.2266
																	7.68	36.1911								87.5	9.09	10.12	9.89	10.44	10.08	11.54		87.5	25.6309	31.9711	28.1303	39.0273	29.5284			9.09	25.6309
																	8.42	36.1815								88	8.51	9.5	9.15	9.77	9.5	11.12		88	25.0792	32.8624	28.8203	38.3612	31.5707			8.51	25.0792
																	8.53	36.4546								88.5	9.09	8.88	9.29	9.24	9.53	11.95		88.5	28.6969	31.5867	28.2306	41.279	27.6099			9.09	28.6969
																	7.98	37.1325								89	7.33	9.2	10.03	10.38		11.16		89	36.2284	29.6638		37.6797	27.8694			7.33	36.2284
																	8.22	37.142								89.5	8.25	9.33	10.05	10.6		11.06		89.5	27.5562	27.5756		43.7424	26.9838			8.05	41.6342
																	7.42	35.4789								90	9.14	9.69	10.02	10.62	9.85	10.59		90	25.5874	28.7939	30.2004	39.1671	32.3465			8.25	27.5562
																	7.71	38.069								90.5	9.03	9.93	10	10.29	9.93	11.27		90.5	27.8718	30.8229	30.8857	41.6978	28.8383			9.14	25.5874
																	7.05	38.3335								91	9.47	9	9.94	10.34	9.54	11.17		91	30.0091	26.21	31.6347	42.987	30.3284			9.03	27.8718
																	7.36	38.0752								91.5	8.64	9.88	10.36	10.23	9.33	11.04		91.5	26.2959	27.5789	31.08	43.8067	30.8184			9.47	30.0091
																	6.91	40.2514								92		9.89	10.16	10.29	9.67	11.1		92		28.2138	31.6141	41.7184	30.9044			8.64	26.2959
																	6.94	37.1394																								8.14	32.9793
																	7.46	37.4073																								8.61	38.3767
																	9.94	42.4744																								8.1	32.3221
																	10.68	43.6971																								8.45	34.3092
																	10.63	40.295																								8.53	35.0706
																	8.61	38.0848																								8.52	37.53
																	8.39	35.2038																								8.68	31.6085
																	7.66	38.0934																								8.49	32.2016
																	8.64	43.1676																								8.03	36.2331
																	8.17	36.6501																								8.14	37.0886
																	8.19	37.8429																								8.42	36.3155
																	7.88	37.1234																								8.74	38.8678
																	7.45	37.6086																								8.46	37.6785
																	8.03	36.6511																								8.02	33.721
																	8.22	36.8757																								8.99	36.999
																	8.25	36.8684																								8.86	37.5576
																	8.71	41.9842																								8.91	36.664
																	9.11	41.2053																								8.43	39.9823
																	9.28	40.2911																								8.85	36.2569
																	8.22	37.3863																								8.65	36.3118
																	7.91	39.0382																								8.72	33.0029
																	9.07	37.1016																								8.84	33.3453
																	8.56	36.8564																								8.95	34.9986
																	9.28	34.9599																								8.68	35.6831
																	8.2	34.238																								8.67	39.6352
																	8.48	35.2363																								8.79	34.9497
																	7.41	33.6235																								8.67	36.9273
																	8.75	37.1298																								9.01	32.0616
																	8.73	40.5756																								9.07	31.6021
																	9.62	39.0964																								8.87	30.1199
																	9.12	34.2685																								9.61	30.9052
																	8.63	36.6651																								9.57	32.9527
																	9.53	37.4016																								10.15	31.555
																	9.45	37.4091																								10.26	30.7999
																	9.35	39.06																								9.55	29.0699
																	9.74	39.2901																								9.87	30.2138
																	10.11	39.3339																								9.25	28.1978
																	9.23	36.1788																								9.91	32.9558
																	9.71	37.6992																								9.86	32.8682
																	9.74	39.3174																								10.33	30.8491
																	9.62	40.2708																								10.05	27.5862
																	9.65	37.3999																								9.66	26.3139
																	8.77	36.8781																								10.19	26.8869
																	8.98	37.6028																								9.93	34.1541
																	9.12	37.8384																								10	29.0001
																	9.33	38.5755																								10.23	27.0416
																	9.36	36.866																								10.35	30.7373
																	7.61	38.5949																								10.1	26.9204
																	8.3	37.4074																								10.71	30.8388
																	8.34	41.7134																								10.09	29.1116
																	8.18	37.8361																								9.95	32.8558
																	8.09	37.6132																								9.71	30.1601
																	7.38	38.5658																								10.1	25.8507
																	7.27	39.3491																								10.02	27.9944
																	7	38.599																								10.52	28.3576
																	7.4	39.0064																								10.26	28.3545
																	6.94	36.6295																								10.19	26.9001
																	7.04	36.6478																								10.45	27.5936
																	7.41	37.5883																								10.91	30.8753
																	9.15	36.8613																								10.6	28.7931
																	9.58	36.8636																								10.47	29.4888
																	10.14	37.8381																								10.81	29.9553
																	8.59	36.6435																								11.4	27.5347
																	8.23	35.9075																								10.57	25.8628
																	7.5	35.9119																								10.69	25.6289
																	7.17	37.8384																								10.08	29.5791
																	7.94	37.6466																								10.92	32.3626
																	7.72	36.6629																								11.06	33.4674
																	8.05	38.817																								11.09	27.5823
																	7.85	38.6108																								10.83	32.1051
																	7.92	37.6403																								10.84	30.8695
																	7.8	37.6306																								10.43	31.4925
																	8.42	37.8437																								11.38	33.2056
																	7.57	37.6487																								10.43	25.6677
																	8.71	39.0399																								10.83	32.4043
																	8.49	39.7618																								11.51	29.997
																	8.03	38.6047																								9.22	42.1999
																	7.57	39.5523																								9.49	40.3096
																	8.83	37.8437																								9.75	33.7717
																	8.09	39.3661																								9.88	38.201
																	8.94	38.5985																								10.4	38.9007
																	8.24	37.8434																								10.13	38.6373
																	8.31	37.8364																								10.08	38.9152
																	7.25	36.9023																								9.54	34.8685
																	8.44	37.6327																								9.98	30.9234
																	7.79	38.0848																								9.63	37.4847
																	8.85	37.6403																								9.91	37.8417
																	9.02	37.8481																								9.62	34.2757
																	9.16	36.1734																								9.82	37.0882
																	9.08	34.8726																								9.89	40.9278
																	9.15	33.3236																								9.94	33.5882
																	9.24	32.6915																								10.22	38.2421
																	7.56	33.3325																								10.35	38.8266
																	8.41	33.3295																								9.39	39.0398
																	8.25	33.3319																								10.06	34.922
																	7.87	35.1847																								10.21	44.9558
																	8.08	35.2122																								10.16	39.904
																	7.52	35.1993																								9.41	36.31
																	7.71	36.1488																								9.65	38.2387
																	6.86	36.1542																								9.93	34.2657
																	7.33	38.0716																								9.76	37.6068
																	6.75	33.9991																								9.86	32.2889
																	6.86	36.1583																								9.34	34.3034
																	7.65	35.2094																								9.53	43.196
																	9.16	32.3825																								9.56	44.0702
																	9.58	33.6143																								10.01	37.7919
																	9.3	35.485																								9.68	36.855
																	8.58	34.5625																								9.01	39.0159
																	8.08	33.3355																								9.05	39.6537
																	7.72	33.3325																								9.15	38.4122
																	7.84	33.2898																								8.75	36.3439
																	8.43	33.6207																								9.91	35.5598
																	8.24	39.0094																								9.81	39.119
																	8.15	37.6645																								8.64	41.9518
																	7.56	39.0069																								8.68	42.0242
																	8.05	34.9701																								8.59	41.7254
																	8.14	34.2457																								8.53	38.7314
																	8.44	34.5467																								8.71	40.8332
																	7.77	34.2457																								8.77	36.6087
																	8.76	33.9939																								9.11	39.8793
																	8.52	32.3831																								8.79	39.5978
																	8.21	35.1971																								8.85	45.018
																	7.43	34.3011																								8.26	38.5714
																	8.84	34.2581																								8.43	33.2799
																	8.29	33.0581																								9.23	35.7119
																	8.92	36.46																								8.7	35.4222
																	8.09	38.0535																								8.37	36.2395
																	8.74	33.3016																								9.1	39.7029
																	7.44	38.3335																								8.84	39.9237
																	8.48	34.24																								8.8	35.3441
																	7.27	35.8086																								8.85	34.2263
																	8.51	35.2105																								9.12	37.7878
																	9.04	38.0812																								9.02	32.1582
																	8.96	38.0882																								8.72	35.2499
																	9.18	37.1378																								9.33	33.2325
																	9.3	37.1202																								9.12	30.006
																	9.22	34.2648																								8.78	32.1094
																	9.31	37.1218																								8.94	28.8727
																	9.01	34.981																								9	30.8398
																	9.32	37.4065																								8.94	30.0991
																	9.38	37.1394																								9.17	30.975
																	9.24	37.1176																								8.7	34.1487
																	9.03	38.0838																								8.97	32.4458
																	9.09	35.2066																								9.17	33.0287
																	8.71	36.859																								9.19	37.497
																	9.09	32.344																								8.97	35.3074
																	9.18	31.5804																								8.88	30.9321
																	9.56	31.5566																								9.42	34.2159
																	9.53	27.7121																								9.3	37.2116
																	7.67	30.5902																								8.65	31.9328
																	8.68	31.5673																								8.74	37.2073
																	8.27	31.0995																								9.51	32.9918
																	7.94	30.3832																								8.66	36.6923
																	7.95	28.4448																								8.44	38.3485
																	7.28	29.4115																								8.72	45.3498
																	7.88	28.6776																								8.61	41.1974
																	6.92	29.4249																								9.17	36.9993
																	7.51	27.4772																								8.76	42.897
																	7.17	27.0042																								9.17	39.1015
																	6.98	27.46																								8.93	41.1968
																	7.47	26.5175																								8.89	36.958
																	9.2	28.4414																								8.74	37.8874
																	9.62	30.5977																								8.66	42.3592
																	9.36	31.5641																								9.09	44.5215
																	8.25	30.5977																								8.97	39.8527
																	8.37	32.72																								9.09	41.9578
																	7.66	32.4849																								9.24	45.2951
																	7.58	30.57																								9.1	39.9614
																	8.47	30.8357																								9.01	46.1479
																	8.21	30.5948																								8.98	45.3205
																	8.24	29.643																								9.4	41.6338
																	7.48	30.579																								9.12	41.8828
																	8.09	29.6453																								9.28	41.6547
																	8.22	29.6144																								9.24	41.6269
																	8.48	29.431																								9.09	37.8583
																	7.79	29.4112																								9.08	43.2042
																	8.63	29.4367																								9.07	34.9345
																	8.34	29.427																								8.97	40.7615
																	8.23	29.4327																								9.16	45.033
																	7.43	29.4193																								8.83	39.4468
																	8.86	28.4289																								8.98	34.9088
																	8.54	32.3208																								8.93	39.8832
																	8.67	30.391																								8.91	41.6844
																	8.16	30.5841																								9.25	38.8066
																	8.8	31.3506																								8.72	42.1521
																	7.51	30.5797																								9.24	35.7418
																	8.45	29.6307																								9.1	44.4783
																	7.49	31.7853																								9.07	34.5117
																	8.67	30.5954																								9.31	38.4117
																	9.17	28.6728																								9.1	40.8663
																	8.74	30.5961																								9.4	37.9207
																	9	30.4007																								10.78	30.1535
																	9.16	29.427																								9.76	34.3244
																	9.25	30.5797																								10.08	30.9292
																	9.37	29.6237																								10.16	32.975
																	9.08	32.4959																								10.2	28.2148
																	8.96	29.4014																								10.84	24.8405
																	9.16	31.5457																								9.66	26.2985
																	9.24	29.631																								9.94	26.2037
																	9.17	29.4306																								9.45	28.219
																	9.15	32.487																								9.98	24.9068
																	9.15	31.5457																								10.08	25.174
																	8.81	41.3249																								10.27	22.9008
																	9.17	39.5868																								10.65	26.2007
																	9.16	38.8625																								10.64	26.2627
																	9.24	39.7188																								10.32	20.8409
																	7.67	40.042																								10.23	23.2969
																	8.55	38.6704																								10.03	24.9993
																	8.32	37.4772																								10.78	22.5001
																	8.19	37.7524																								9.33	31.1035
																	8.26	37.5026																								9.81	24.1738
																	7.4	36.5178																								8.68	36.2616
																	7.74	36.1356																								9.04	34.4577
																	6.98	34.0017																								9.12	36.2839
																	7.51	35.9607																								9.54	29.1077
																	7.05	32.8333																								9.16	30.9262
																	6.85	32.8005																								9	30.8025
																	7.66	32.2538																								8.78	30.9128
																	8.99	32.5832																								9.28	25.4524
																	9.81	33.883																								9.12	30.3491
																	10	28.6869																								9.07	30.4861
																	8.6	32.4139																								8.8	36.5842
																	8.5	33.7641																								9.22	28.3274
																	7.91	33.791																								9.34	32.8348
																	7.99	34.2143																								9.32	36.8817
																	8.43	36.8982																								9.2	33.6148
																	8.47	38.228																								9.26	35.3302
																	8.13	39.5728																								8.58	28.5555
																	7.75	40.9692																								9.31	33.7254
																	8.19	39.6952																								9.01	37.5803
																	8.07	40.0733																								9.01	33.5209
																	8.41	36.4679																								9.76	37.8419
																	8	38.663																								9.48	35.7117
																	9.04	38.6893																								9.59	37.0679
																	8.82	40.417																								9.65	35.4713
																	8.35	36.4321																								9.4	30.9262
																	8.02	37.8363																								9.54	32.4084
																	8.67	38.4314																								9.39	37.548
																	8.48	37.8533																								9.46	32.9352
																	8.82	38.2141																								9.5	30.8972
																	8.46	40.8589																								9.7	34.9395
																	8.81	25.5616																								9.55	32.9024
																	9.29	27.4708																								9.4	28.8866
																	8.01	33.3239																								9.24	32.9359
																	8.97	33.3452																								9.28	37.0236
																	8.74	33.3336																								9.37	37.487
																	8.39	32.3642																								9.5	31.4866
																	8.64	33.3256																								9.23	34.279
																	7.94	32.1845																								9.28	32.1456
																	8.28	33.3408																								9.29	34.2644
																	7.35	33.175																								9.6	33.681
																	7.64	34.151																								9.19	36.2802
																	7.16	32.0551																								9.5	35.587
																	7.22	33.1622																								8.91	38.3332
																	7.77	33.0315																								9.02	35.3488
																	9.43	32.3526																								9.11	32.2259
																	9.94	32.2094																								9.12	37.85
																	10.01	31.2309																								10.26	28.3545
																	9.02	31.0902																								10.19	26.9001
																	8.51	33.172																								10.28	28.8812
																	7.85	34.0171																								10.91	31.6063
																	7.96	32.0563																								10.6	28.7931
																	8.25	33.3248																								10.61	31.4744
																	8.73	32.1799																								10.81	29.9553
																	8.59	33.1735																								11.4	28.8398
																	8.27	32.1799																								10.57	29.1209
																	8.69	32.1944																								10.85	31.5957
																	8.72	32.1996																								10.08	30.1872
																	8.85	32.0588																								10.93	29.9643
																	7.15	33.1637																								11.06	33.4674
																	9.01	32.1897																								11.12	26.3063
																	8.88	31.2309																								10.79	31.5774
																	8.46	32.3355																								10.76	28.3433
																	8.23	29.4266																								10.79	30.7894
																	9.05	32.3428																								11.38	33.6175
																	7.8	33.0267																								10.52	29.5469
																	8.7	32.0624																								10.85	29.606
																	8.75	32.2073																								11.52	34.2277
																	8.27	32.3355																								11	30.9
																	8.45	33.1533																								10.93	33.6496
																	7.41	32.1882																								11.4	29.141
																	8.19	33.3168																								11.31	30.8345
																	7.18	33.1706																								11.34	32.3836
																	7.92	32.1959																								11.03	30.1668
																	7.04	33.3266																								11.38	28.2073
																	7.23	31.8021																								10.95	28.1697
																	7.58	33.3186																								11.46	28.8453
																	9	32.1799																								11.23	28.3306
																	9.55	32.1882																								10.82	28.2537
																	10.09	33.1465																								11.09	29.124
																	8.97	32.3624																								10.88	25.4806
																	8.72	38.1908																								11.08	27.4693
																	8.23	38.0818																								11.14	32.2964
																	7.86	35.2593																								10.86	28.2202
																	8.46	36.2314																								10.68	25.5335
																	8.57	36.2508																								11.32	26.9545
																	8.37	35.1593																								10.65	30.3501
																	7.95	36.2327																								10.69	32.2071
																	8.32	33.1458																								9.88	27.0541
																	8.51	36.1357																								10.72	27.5323
																	8.59	32.2938																								10.74	28.275
																	7.93	33.2649																								10.58	29.5606
																	9.15	38.0708																								11.05	30.8592
																	8.9	32.6358																								9.05	35.6888
																	8.54	33.1434																								8.83	36.9492
																	8.15	36.0236																								9.18	38.6233
																	9.13	33.2733																								8.9	37.8833
																	8.27	32.2945																								9.17	37.515
																	9.41	36.117																								9.4	34.9987
																	8.74	35.041																								9.2	36.6002
																	8.67	35.0392																								9.37	39.5314
																	7.79	32.1785																								9.1	37.8875
																	8.79	33.2817																								9.27	37.4793
																	8.03	33.2817																								9.22	38.6673
																	9.23	38.2054																								8.95	33.0147
																	9.36	36.1236																								9.59	39.5858
																	9.05	37.0971																								9.43	40.3725
																	9.55	32.2801																								8.5	38.3789
																	9.45	36.2327																								8.93	33.7231
																	9.34	32.1797																								9.24	37.2684
																	9.58	33.4245																								9.28	39.9445
																	9.22	34.2698																								9.22	37.0747
																	9.15	37.9979																								9.12	36.3052
																	9.57	38.0907																								9.41	38.3795
																	9.25	32.845																								9.33	38.349
																	7.64	31.8206																								9.09	33.5009
																	8.6	31.848																								9.68	38.3026
																	8.36	32.8041																								9.25	40.4278
																	8.04	33.7875																								9.37	42.9828
																	7.955	32.8363																								9.71	39.6256
																	7.445	35.3182																								9.33	39.6256
																	8.025	31.8851																								8.99	38.6495
																	7.215	32.2958																								9.68	39.9401
																	7.42	32.8253																								9.42	35.5276
																	7.03	32.3504																								9.17	32.579
																	6.81	32.3668																								9.23	43.7143
																	7.6	32.8684																								9.29	36.541
																	9.04	31.8939																								9.47	36.2694
																	9.36	32.8257																								9.24	43.2209
																	9.93	31.874																								9.46	35.5486
																	8.79	32.3505																								9.17	38.3174
																	8.37	35.291																								9.04	39.6404
																	7.48	35.7883																								9.42	38.6077
																	7.22	34.7806																								8.91	34.1344
																	8.29	36.286																								9.39	34.2474
																	7.925	31.8771																								9.53	34.9497
																	7.45	31.8716																								9.53	33.7177
																	7.35	32.4304																								9.56	36.9222
																	7.74	30.9278																								9.26	34.2898
																	7.755	31.8659																								8.2	32.19
																	8.14	32.8233																								8.6	36.2859
																	7.595	32.8856																								8.29	34.5519
																	8.525	31.4183																								8.6	32.9003
																	8.425	32.3511																								8.75	35.0142
																	8.005	32.339																								9.37	38.2811
																	7.785	31.9034																								8.89	42.4036
																	8.68	34.3209																								8.91	37.4953
																	8.3	34.3309																								8.81	35.7747
																	8.68	31.8473																								8.95	39.5984
																	7.7	32.3495																								8.62	34.9471
																	8.26	33.8191																								8.81	33.6873
																	7.03	32.3165																								9.14	35.5206
																	8.6	33.7863																								8.63	31.7329
																	8.1	33.7717																								8.89	33.7112
																	9.13	34.293																								9.05	37.5516
																	8.71	32.3302																								8.88	39.5654
																	8.31	32.8549																								8.55	40.3059
																	8.81	33.3256																								8.76	40.8586
																	8.795	32.8333																								8.9	36.9902
																	8.67	33.2884																								8.81	31.6475
																	9.06	32.8468																								9.31	40.7218
																	8.875	34.8093																								9.25	36.2257
																	8.91	32.8799																								9	39.6965
																	9.07	34.7954																								9.53	34.5613
																	8.91	32.8022																								8.48	34.5111
																	9.05	31.8091																								8.44	42.2567
																	9.04	32.8134																								9.5	41.6644
																	8.69	33.8361																								9.39	30.3934
																	8.94	32.877																								8.79	36.3089
																	9.12	33.815																								9.54	32.5124
																	9.51	32.8038																								9.42	35.4401
																	9.19	35.8351																								9.61	32.3514
																	7.38	37.8663																								9.43	33.7346
																	8.36	36.8087																								9.64	43.225
																	8.2	36.7585																								9.18	36.3087
																	7.77	35.7747																								9.08	40.7471
																	8.09	34.7903																								8.89	32.8719
																	7.14	36.8049																								8.02	31.2534
																	7.56	35.8229																								10.3	38.976
																	6.94	36.817																								9.88	39.6393
																	7.25	34.7999																								9.6	40.9288
																	6.73	36.807																								9.46	35.8181
																	6.78	36.7574																								9.55	32.3448
																	7.23	36.767																								8.99	39.0242
																	9.03	36.7576																								9.1	37.5217
																	9.45	36.7673																								9.17	36.2765
																	9.6	40.8194																								9.19	35.0218
																	8.34	35.8334																								8.44	30.8811
																	7.9	34.7798																								8.3	35.6468
																	7.32	35.8229																								8.11	34.8663
																	7.02	32.7779																								8.54	38.349
																	7.69	36.7966																								8.6	31.6438
																	7.6	34.7897																								9.15	35.0372
																	7.82	33.7618																								9.23	37.0017
																	7.35	38.8541																								9.76	37.7222
																	7.86	34.8516																								9.44	38.8804
																	7.82	37.7616																								9.69	38.3908
																	8.11	37.788																								8.79	43.7116
																	7.24	37.7969																								9.52	44.977
																	8.36	38.7444																								9.31	35.0938
																	8.35	36.7566																								9.89	39.0273
																	7.82	38.7702																								9.15	38.3612
																	7.64	37.7409																								9.29	41.279
																	8.43	36.7566																								10.03	37.6797
																	7.69	36.7764																								10.05	43.7424
																	8.52	36.7434																								10.02	39.1671
																	7.85	36.7434																								10	41.6978
																	8	36.7662																								9.94	42.987
																	7.3	36.7571																								10.36	43.8067
																	8.38	35.792																								10.16	41.7184
																	7.67	35.7843																								9.95	32.8936
																	8.37	35.7496																								9.7	38.3194
																	8.72	35.8127																								9.46	39.5723
																	8.59	38.8739																								9.99	33.6216
																	9.02	39.8298																								10	39.6017
																	8.74	38.7737																								10.1	39.0646
																	8.53	37.7426																								10.15	38.0375
																	8.93	37.7409																								9.86	37.9714
																	8.7	36.766																								9.76	32.8682
																	9.03	37.7954																								9.72	35.7361
																	8.57	37.76																								9.77	35.5257
																	8.65	37.7274																								9.97	33.5612
																	8.93	36.7877																								9.74	35.532
																	8.62	33.8062																								9.83	34.9804
																	8.34	37.742																								10.31	35.5402
																	9	37.7373																								10.37	35.5765
																	8.9	36.7679																								9.95	34.2631
																	9.94	35.7821																								10.28	32.3667
																	9.11	31.8293																								10.44	34.2272
																	7.56	35.7926																								10.2	34.2789
																	8.22	32.811																								10.28	30.8755
																	8.15	34.7889																								9.48	33.5276
																	7.87	35.7821																								9.72	33.3119
																	7.92	31.8191																								10.08	34.9472
																	7.31	31.8399																								9.53	33.5075
																	7.81	32.8031																								10.21	31.535
																	6.79	31.8079																								10.08	30.9506
																	7.05	32.7619																								10.23	26.8664
																	6.58	32.7977																								9.97	32.4143
																	6.9	31.8138																								10.05	35.7976
																	7.43	32.7977																								10.46	33.6758
																	8.9	32.7977																								9.8	34.317
																	9.56	32.8113																								9.91	31.6802
																	9.43	31.8386																								10.03	33.6142
																	8.36	34.7755																								10.26	36.2007
																	8.22	34.7556																								10.42	32.9154
																	7.34	32.8119																								9.8	32.0502
																	7.44	31.8191																								9.82	33.2684
																	7.93	31.8191																								10.36	30.3564
																	8.16	32.7878																								9.98	37.0255
																	7.78	33.787																								10.08	28.9966
																	7.49	33.7755																								10.29	27.9798
																	7.71	33.7717																								10.62	27.6614
																	7.99	32.792																								10.32	30.4389
																	8.12	36.7533																								10.85	39.6496
																	7.61	32.8176																								10.58	33.2875
																	8.51	33.7817																								10.29	26.8669
																	8.45	34.7755																								9.95	32.4001
																	7.95	32.7977																								10.04	38.3395
																	7.26	35.7594																								10.95	30.7966
																	8.5	32.7679																								10.94	24.8748
																	8.11	31.8284																								10.61	21.6583
																	8.49	31.8039																								11.68	27.6369
																	7.8	32.7977																								11.03	28.3226
																	8.13	35.7594																								11.15	26.5618
																	7.03	36.7756																								10.79	27.6127
																	8.37	32.7878																								11.15	28.2258
																	7.29	33.7752																								11.23	25.4957
																	8.69	34.7457																								11.14	34.1062
																	8.59	33.7618																								10.81	30.1401
																	8.35	35.7495																								11.34	25.511
																	8.84	32.8028																								11.07	26.853
																	8.91	33.7916																								11.31	34.3684
																	9	36.7657																								11.23	32.2246
																	8.75	36.8253																								11.01	27.4767
																	8.82	33.8015																								10.76	25.4766
																	8.9	34.7685																								11.39	24.3234
																	9.2	33.8015																								11.02	24.9569
																	8.81	33.8015																								10.78	26.7926
																	8.9	33.7741																								10.53	28.6011
																	8.64	31.8622																								11.58	26.8395
																	8.36	36.7756																								11.19	28.7206
																	8.85	35.7818																								11.46	27.7801
																	9	32.8176																								11.28	27.5088
																	9.37	33.8185																								10.62	27.5539
																	9.06	35.9842																								11.74	26.1471
																	7.65	35.982																								9.98	37.5612
																	8.62	35.8795																								9.65	35.661
																	8.39	35.013																								9.49	36.228
																	7.98	35.0096																								9.73	38.4832
																	7.99	35.8795																								9.83	39.8458
																	7.09	36.9536																								9.51	34.2198
																	7.75	35.8087																								9.78	39.554
																	7.11	36.8789																								9.07	27.6069
																	7.35	35.9919																								9.35	34.1996
																	7.01	35.9962																								9.58	37.8906
																	7.02	34.904																								9.48	38.3211
																	7.38	36.9666																								9.75	30.8869
																	9.16	36.0204																								10.14	37.9671
																	9.52	36.8559																								9.68	34.8648
																	9.7	35.8274																								10.28	28.261
																	8.54	37.9757																								9.87	34.9176
																	8.41	36.9744																								9.54	35.63
																	7.71	36.9656																								9.94	33.5746
																	7.44	34.9156																								9.61	36.5196
																	8.11	35.891																								9.34	34.8685
																	7.98	35.8968																								10.29	36.4833
																	7.68	37.9549																								10.07	33.7405
																	7.46	35.8959																								9.63	31.7406
																	7.85	36.9479																								10.02	26.2875
																	7.93	35.9885																								9.66	30.9663
																	8.49	34.9023																								10.03	32.8764
																	7.68	34.9014																								9.8	31.5508
																	8.79	35.8902																								9.3	34.2907
																	8.38	35.8926																								9.22	38.4551
																	7.72	36.8618																								9.57	34.625
																	7.95	34.8825																								9.76	27.1417
																	9.05	36.9536																								10.04	34.6627
																	8.34	37.0956																								9.56	35.6945
																	8.72	36.1191																								9.34	38.1872
																	7.95	36.869																								10.03	36.8686
																	8.34	36.884																								10.04	28.9467
																	7.29	36.8666																								9.46	30.254
																	8.24	35.9962																								9.55	29.6427
																	7.29	36.8725																								9.81	42.4169
																	8.67	35.8951																								8.55	41.3886
																	9.02	36.8658																								8.72	45.6866
																	8.51	35.8827																								8.6	40.318
																	8.6	38.0677																								9.19	46.6266
																	8.91	36.8575																								9.07	43.4664
																	9.16	35.1121																								9.1	39.2576
																	8.96	31.8864																								9.57	44.5591
																	8.81	33.9177																								8.94	42.4826
																	8.82	32.7855																								9.09	40.2951
																	8.93	32.851																								8.77	32.9947
																	8.98	32.8678																								8.8	41.4588
																	8.84	32.8468																								9.12	44.4541
																	8.76	35.0108																								9.24	43.4059
																	8.45	35.0096																								9.13	38.4422
																	8.705	36.9645																								9.19	42.4117
																	8.235	34.8556																								9	36.1435
																	8.89	36.0171																								9.22	36.084
																	9.03	34.2767																								9.13	39.2849
																	8.335	33.7816																								9.62	40.4032
																	8.705	33.785																								9.04	42.5621
																	8.665	33.7998																								9.44	40.2606
																	8.69	34.2637																								9.29	42.4265
																	8.635	34.2867																								9.08	38.1519
																	8.245	33.2798																								9.73	40.2322
																	8.47	33.7817																								9	36.2033
																	8.055	33.2927																								9.42	42.5384
																	8.23	34.7787																								9.12	41.4376
																	7.975	34.282																								9.49	40.3161
																	7.89	33.7901																								9.18	41.4022
																	8.165	35.7875																								9.02	42.3552
																	8.98	32.3007																								9.39	40.3687
																	9.7	32.2997																								9.26	42.3683
																	9.58	31.3724																								9.21	39.2811
																	8.63	37.7496																								9.46	38.2804
																	8.22	36.7732																								9.34	31.8849
																	7.88	34.7755																								9.4	30.959
																	7.51	35.7832																								9.36	35.0534
																	8.19	36.7533																								9.37	41.4087
																	7.98	37.7373																								9.22	31.6369
																	8.07	32.8224																								9.28	40.1687
																	7.64	36.8133																								9.14	36.855
																	8.14	31.8238																								8.76	32.2156
																	7.99	36.7533																								9.19	37.7669
																	8.43	35.8017																								9.88	35.979
																	7.73	34.7755																								9.09	36.2927
																	8.9	37.7699																								9.91	41.1157
																	8.56	35.792																								9.45	37.4141
																	8.15	36.7864																								9.49	37.0346
																	7.59	36.7958																								9.27	35.7598
																	8.73	36.7633																								9.29	33.5814
																	8.34	34.7855																								9.85	29.6075
																	8.74	36.7563																								9.46	33.4742
																	8.06	34.8394																								9.51	30.9563
																	8.59	35.7829																								9.65	36.8818
																	7.34	35.8028																								10.03	34.8898
																	8.43	32.8538																								9.49	34.1028
																	7.14	35.7794																								9.57	34.489
																	8.57	33.7863																								9.63	34.3065
																	9.13	31.8076																								9.5	26.2299
																	8.9	31.7939																								9.8	22.9398
																	9	31.8038																								9.99	26.1809
																	8.93	31.8039																								9.63	30.1467
																	9.36	31.784																								9.86	32.2889
																	9.17	31.8039																								9.52	24.2312
																	8.79	32.7778																								9.42	24.1961
																	9.02	31.7939																								9.6	25.5132
																	9.27	31.8039																								9.55	22.1269
																	9.24	32.7914																								9.62	23.6992
																	9.06	32.7878																								9	22.8759
																	8.92	31.7939																								9.13	23.4318
																	8.73	33.7816																								9.54	26.2933
																	9.23	31.8094																								9.91	27.7604
																	7.97	31.8088																								9.73	29.5162
																	8.82	29.8902																								9.42	30.3203
																	8.73	36.8921																								9.86	28.3322
																	8.21	37.8627																								9.35	28.0882
																	8.67	35.8975																								9.64	29.0569
																	7.48	33.924																								9.38	28.7985
																	8.03	35.9182																								9.15	28.9298
																	7.04	36.9058																								9.23	31.5646
																	7.82	35.9188																								9.21	26.2205
																	6.92	32.9137																								8.94	24.2036
																	7.26	33.8909																								8.73	26.9379
																	7.82	34.898																								9.04	23.4787
																	9.14	37.94																								8.29	21.5209
																	9.94	37.9036																								8.48	20.1785
																	9.89	34.9079																								8.77	24.211
																	8.98	33.8809																								9.15	28.8461
																	8.69	34.9079																								9.15	30.8505
																	8.07	35.9282																								9.19	30.1601
																	7.74	37.9025																								8.95	28.2815
																	8.36	36.9053																								9.63	29.0684
																	8.31	35.918																								9.54	22.938
																	8.1	35.9094																								9.85	32.3111
																	7.69	35.9088																								10.13	30.8433
																	8.59	35.918																								10.1	28.2104
																	8.51	32.9137																								9.55	28.1597
																	8.2	35.8751																								9.89	26.2128
																	7.83	36.8953																								11	27.0526
																	8.35	36.8848																								11.09	28.0298
																	8.99	35.9174																								11.47	28.4797
																	8.55	35.905																								11.33	32.8825
																	8.32	35.9544																								10.48	32.8403
																	8.9	32.9846																								11.12	29.5253
																	8.74	32.9397																								11.09	27.8187
																	8.81	34.9119																								10.64	30.8403
																	9.27	35.885																								10.96	29.577
																	8.78	29.6597																								11.15	26.2856
																	7.36	31.5663																								10.24	27.1264
																	8.24	31.3956																								11.14	32.2972
																	8.27	30.6393																								11.35	33.4875
																	7.7	33.0263																								10.95	32.2553
																	7.93	31.5867																								11.2	26.8597
																	7.32	31.6857																								10.89	28.8376
																	7.53	30.4085																								11.24	26.2394
																	6.7	34.7167																								11.19	30.1402
																	7.1	30.4007																								11	32.2748
																	6.64	34.6911																								11.06	26.8935
																	6.79	32.5398																								11.71	27.7167
																	7.18	31.5945																								11.63	26.2367
																	8.74	31.3006																								10.94	30.1534
																	9.16	29.1384																								11.55	26.1809
																	9.58	29.6407																								11.45	27.5062
																	8.13	30.4144																								11.6	26.2523
																	8.16	31.3777																								11.53	27.538
																	7.21	34.4946																								11.35	27.5437
																	7.05	33.5316																								11.45	25.5071
																	7.69	35.4374																								11.25	24.2206
																	7.7	35.6773																								10.93	30.241
																	7.35	33.7504																								11.46	25.4859
																	6.85	32.8423																								11.27	28.8125
																	7.88	31.5748																								11.31	33.0451
																	7.32	30.4183																								11.34	29.4522
																	7.61	31.8139																								11.26	26.2187
																	7.51	31.5867																								11.01	25.4773
																	8.33	30.4202																								10.9	25.4929
																	8.08	31.591																								11.27	24.6284
																	7.79	35.6856																								11.42	27.0125
																	7.65	31.6073																								11.06	26.187
																	8.3	31.5694																								11.05	28.7447
																	7.96	31.3815																								11.14	27.5012
																	8.25	31.5923																								10.7	26.2524
																	7.32	33.5018																								11.1	27.5954
																	7.47	33.2507																								11.01	26.5108
																	6.7	31.3739																								10.7	25.5765
																	8.25	30.4359																								11.21	29.0063
																	6.94	33.053																								11.04	24.6403
																	8.63	33.3105																								11.17	25.45
																	8.08	29.5895																								11.03	22.9188
																	8.08	36.6403																								11.49	22.4402
																	8.34	32.5052																								11.31	36.8559
																	8.4	35.4451																								11.45	38.7831
																	8.25	35.4568																								10.55	36.1055
																	8.59	31.3682																								11.14	39.6386
																	8.39	35.4549																								11.37	38.311
																	8.26	34.7053																								11	39.5943
																	8.36	32.5504																								10.99	35.4675
																	8.05	35.4549																								11.42	33.6873
																	8.3	35.6521																								11.36	36.256
																	8.7	32.5592																								10.95	36.9685
																	7.84	34.8256																								11.25	34.8987
																	8.85	32.5495																								11.55	40.2291
																	8.92	35.4373																								11.16	37.003
																	9.07	33.719																								10.84	34.2343
																	8.82	27.7217																								11.78	37.5996
																	7.3	31.1508																								11.41	37.6378
																	8.28	33.0172																								11.21	36.875
																	8.18	33.7234																								11.64	36.9623
																	7.76	34.9195																								11.42	38.8608
																	8.14	31.8073																								11.37	34.2428
																	7.15	33.0228																								11.69	31.6035
																	7.57	31.5601																								11.19	37.5911
																	6.84	31.5782																								11.14	39.1164
																	7.2	33.042																								11.36	35.5535
																	6.43	30.6261																								11.65	35.5332
																	6.75	34.7019																								11.07	40.919
																	7.02	30.8721																								10.97	34.214
																	8.85	32.0874																								11.32	40.1553
																	8.99	30.6187																								11.46	33.5547
																	9.38	31.7998																								11.09	35.6772
																	8.23	33.0309																								11.09	42.0456
																	7.65	31.576																								10.91	36.3075
																	7.14	32.5429																								11.31	42.9562
																	7.12	30.6409																								11.01	39.6
																	7.71	31.8097																								11.04	38.2686
																	7.62	31.8001																								10.3	38.8516
																	7.64	30.899																								10.46	36.3304
																	7.14	31.8169																								10.91	31.593
																	7.8	30.6261																								10.89	32.01
																	7.53	32.0766																								10.88	38.2897
																	7.89	30.1826																								10.43	36.3219
																	6.86	31.1404																								10.34	34.9333
																	8.1	32.0985																								10.62	38.3802
																	8.01	32.0874																								10.56	36.9488
																	7.52	29.6453																								10.62	35.6654
																	7.27	30.8504																								10.71	36.3933
																	8.05	30.8465																								10.01	32.8839
																	7.59	33.0405																								10.85	32.8839
																	8.13	29.6187																								10.36	34.891
																	7.34	30.8555																								10.98	36.862
																	7.38	30.858																								10.45	37.6276
																	6.66	31.8172																								10.22	38.6141
																	7.68	30.6335																								10.8	37.7755
																	7.25	35.5197																								10.79	28.8766
																	7.9	33.9939																								10.87	28.9156
																	8.13	30.8632																								10.69	28.1931
																	7.77	33.6084																								10.2	30.7733
																	8.32	30.6164																								10.4	25.4868
																	8.07	30.8676																								10.58	28.8307
																	7.95	33.993																								10.21	34.8777
																	8.16	29.6531																								11.04	33.298
																	7.93	30.4046																								10.91	31.9711
																	8.33	31.5707																								10.54	32.8624
																	8.19	33.0201																								10.34	31.5867
																	8.16	31.4069																								10.19	29.6638
																	8.34	29.4521																								10.69	27.5756
																	7.79	30.6187																								10.91	28.7939
																	7.71	32.0834																								10.99	30.8229
																	8.81	33.0569																								10.54	26.21
																	8.87	33.9956																								10.66	27.5789
																	9.73	32.0933																								10.69	28.2138
																	9.36	32.6749																								10.82	27.0211
																	7.5	33.05																								10.5	28.9108
																	8.45	33.8757																								10.73	29.1796
																	8.18	32.8961																								10.58	27.4767
																	8.14	33.8516																								10.13	35.6398
																	7.99	33.3801																								10.62	24.239
																	7.31	36.6507																								10.14	28.2543
																	7.82	33.9821																								10.84	24.8621
																	7.12	31.6989																								10.5	27.0875
																	7.14	34.473																								10.52	28.1689
																	6.69	34.9445																								10.24	26.8127
																	6.84	35.1734																								10.11	28.7422
																	7.22	33.6099																								10.26	27.5478
																	8.81	33.5337																								10.43	24.2559
																	9.84	32.6384																								10.4	29.692
																	10.2	33.3073																								9.34	27.5772
																	8.62	31.8219																								9.33	26.8463
																	8.21	32.0985																								8.98	26.8262
																	7.47	31.8097																								9.51	26.2806
																	7.09	30.8753																								9.26	28.1931
																	8.24	31.5967																								9.67	31.1562
																	8.16	31.8265																								9.07	28.8461
																	7.59	30.8792																								9.32	27.5747
																	7	32.7561																								8.89	31.1575
																	7.47	31.8365																								8.62	24.1719
																	7.81	30.6238																								9.29	31.5339
																	7.88	30.8523																								8.71	30.2473
																	7.29	32.7634																								9.01	30.9128
																	8.21	32.0792																								8.98	28.3115
																	8.03	30.8766																								9.04	30.3086
																	8.05	31.8097																								9.2	27.4824
																	7.75	32.7778																								9.45	27.5873
																	8.37	32.0739																								8.66	25.7896
																	7.56	31.1271																								9.24	24.2203
																	8.16	30.8632																								9.19	28.9691
																	7.68	35.2189																								9.17	30.1802
																	7.73	31.7902																								9.42	27.0791
																	6.97	32.7754																								9.66	24.2184
																	7.76	33.3088																								9.57	26.3063
																	7.09	32.0862																								9.67	30.3501
																	8.15	33.9834																								9.05	29.5413
																	8.63	33.9642																								9.34	27.5471
																	7.93	32.7971																								9.89	29.0981
																	8.04	33.7571																								9.64	24.2559
																	8.63	32.7586																								9.4	26.1724
																	8.49	35.8885																								9.7	29.5641
																	8.56	35.8932																								10.3	26.187
																	8.57	38.0952																								10.39	29.5535
																	8.52	36.1597																								10.29	26.509
																	8.65	32.5462																								10.37	30.2824
																	8.24	37.1192																								9.92	24.9867
																	8.26	36.8612																								8.86	33.2631
																	8.35	35.6579																								9.17	31.5942
																	8.01	35.4354																								9.56	28.8663
																	9.02	36.1884																								10.4	31.1316
																	8.81	33.4934																								10.06	28.2847
																	8.98	35.51																								9.15	28.8446
																	9.11	33.3292																								9.52	31.1194
																	7.42	37.2453																								10	29.9371
																	7.97	34.7836																								9.52	28.8494
																	8.18	35.4451																								9.55	26.3062
																	7.85	35.451																								9.92	28.8697
																	7.97	35.4763																								10.08	29.1533
																	7.38	34.0383																								9.35	29.9138
																	7.8	37.8033																								8.51	32.7805
																	6.98	36.273																								8.98	28.2479
																	7.24	35.9792																								10.22	25.5071
																	6.89	37.523																								9.13	30.2003
																	6.91	37.2503																								9.11	32.9311
																	7.41	37.3251																								9.1	27.596
																	8.9	36.4474																								9.47	32.1589
																	9.4	36.5406																								9.03	36.2218
																	9.37	37.9848																								9.91	28.8936
																	8.36	37.906																								9.93	34.8882
																	8.49	35.6845																								9.3	36.0932
																	7.61	34.3408																								9.29	36.2293
																	7.13	33.9488																								10.08	34.8363
																	7.8	32.9541																								9.5	38.2781
																	7.84	36.7492																								9.53	30.3501
																	7.52	37.1638																								10.31	31.7768
																	6.96	37.6768																								10.21	34.2415
																	7.66	38.7817																								9.85	30.8519
																	7.71	38.3722																								9.93	33.5871
																	8.21	37.0144																								9.54	37.59
																	7.48	38.1395																								9.33	32.9037
																	8.14	38.2975																								9.67	32.4217
																	8.26	38.2967																								9.38	31.1132
																	7.89	38.2244																								9.11	31.5428
																	7.03	37.2607																								8.57	23.7466
																	8.71	34.395																								8.95	32.3419
																	8.02	34.8094																								9.23	30.2205
																	8.25	38.0238																								8.86	34.3084
																	7.68	38.3304																								9.45	36.1883
																	8.11	35.7803																								8.91	32.3167
																	7.16	37.8284																								8.95	38.1402
																	8.14	36.8418																								8.49	36.7812
																	6.72	36.8524																								8.61	31.5372
																	8.11	35.6746																								9.04	30.2205
																	8.23	38.7194																								8.79	31.7436
																	7.84	37.753																								8.43	31.23
																	8.19	37.1267																								9.32	32.7922
																	8.11	36.1409																								9.74	28.1952
																	8.34	35.8769																								9.32	31.4973
																	8.55	37.2504																								9.29	34.1902
																	8.2	35.2888																								9.26	38.5643
																	8.15	38.2236																								8.64	33.1809
																	8.34	35.7984																								9.16	35.1714
																	8.45	38.1516																								9.47	37.276
																	8.24	38.2298																								8.83	36.2412
																	8.22	37.3346																								9.1	41.4896
																	8.17	35.3775																								9.07	39.5955
																	8.275	36.6925																								8.84	42.5188
																	7.93	37.3363																								8.78	39.4533
																	8.715	34.0194																								9.12	47.0924
																	8.745	34.0183																								9.39	40.7923
																	7.805	34.1507																								8.71	40.5978
																	8.415	33.1804																								9.19	43.8196
																	8.325	33.0339																								9.05	42.6785
																	8.14	35.1007																								8.96	45.8438
																	8.285	36.1086																								9.01	38.7244
																	7.98	34.3103																								9.01	41.6056
																	8.09	34.2919																								9.28	43.7595
																	7.845	33.3248																								8.6	44.7404
																	8.28	37.0877																								9.13	44.0864
																	7.69	33.3434																								8.76	43.5673
																	7.8	34.1495																								8.86	46.2054
																	7.7	33.3354																								9.12	45.8531
																	9.19	33.0414																								9.36	45.9388
																	9.64	34.297																								9.33	44.5488
																	9.54	34.3022																								9.38	42.4794
																	8.32	34.3005																								9.26	45.803
																	8.12	37.0864																								8.67	42.8591
																	7.29	38.2122																								9.45	42.868
																	7.1	37.9513																								9.2	40.778
																	8.01	37.2178																								9.15	38.2836
																	8	37.066																								10.05	39.6228
																	7.66	37.9482																								10.59	43.7528
																	6.98	34.4472																								10.79	36.3651
																	7.55	35.2485																								10.29	44.5388
																	7.42	33.1629																								10.3	38.4328
																	8.13	34.2953																								9.96	40.5693
																	7.57	33.5228																								10.1	36.183
																	8.4	33.175																								9.95	39.6068
																	8.07	34.3005																								10.43	43.2294
																	7.97	33.3266																								9.57	39.938
																	7.08	32.366																								10.19	37.2147
																	8.58	35.2649																								10.15	42.6319
																	7.84	34.2855																								10.42	29.7282
																	8.24	34.1579																								9.08	36.6259
																	7.6	34.0357																								10.25	42.653
																	8.49	35.126																								10.35	41.6806
																	7.15	36.2386																								9.91	39.6279
																	7.72	36.983																								10.24	40.4757
																	6.93	36.0919																								10.14	45.006
																	8.39	37.8711																								10.53	37.8666
																	8.39	37.9399																								9.53	38.5243
																	8.32	35.1176																								10.65	33.7358
																	8.54	35.1302																								10.13	39.6074
																	8.28	36.1157																								10.14	35.1519
																	8.46	33.1691																								10.27	37.2973
																	8.66	34.023																								10.26	38.6913
																	8.39	35.9864																								10.59	38.7244
																	8.58	34.1267																								9.28	32.1252
																	8.84	34.1638																								9.32	41.2292
																	9.07	34.0119																								8.84	40.6023
																	8.55	34.0107																								9.21	37.461
																	8.77	39.8626																								9.1	40.5206
																	7.94	35.0088																								8.48	42.901
																	8.86	33.0462																								9.32	38.7192
																	7.92	34.155																								9.1	45.8922
																	8.71	34.3085																								8.43	43.2458
																	8.29	37.9679																								8.58	38.7229
																	7.64	37.0864																								8.82	36.4315
																	8.15	35.1471																								9.15	44.8174
																	7.63	37.0989																								9.02	39.9465
																	7.93	37.2425																								8.82	42.4325
																	7.13	38.1932																								8.86	39.8669
																	7.58	37.2276																								9.11	40.5365
																	7.04	37.2276																								9.25	39.6543
																	7.22	38.0617																								9.03	40.7482
																	7.44	36.1283																								9.49	42.6591
																	8.98	37.0976																								8.66	43.7039
																	9.63	37.2244																								9.08	40.3147
																	9.79	37.0824																								9.29	36.5964
																	8.39	37.2295																								8.77	35.027
																	8.35	35.126																								8.93	31.5485
																	7.96	37.221																								9.15	29.504
																	7.46	37.2374																								8.72	32.2562
																	8.28	37.1088																								8.67	31.5543
																	7.97	36.0039																								9	36.2405
																	7.79	36.9819																								9.26	35.5118
																	7.55	38.069																								8.43	32.9313
																	7.81	37.2409																								9.53	33.7239
																	8.15	37.1141																								9.08	30.8855
																	7.79	37.0877																								9.22	32.9899
																	7.38	32.1913																								9.03	36.9957
																	8.61	37.1003																								8.71	34.9832
																	8.72	33.1509																								9.21	38.352
																	8.19	35.0951																								8.81	40.9455
																	7.55	37.1008																								8.91	39.7
																	8.53	36.0072																								8.98	38.352
																	8.94	36.972																								9.04	39.6
																	8.92	33.3203																								9.01	33.0166
																	9.655	37.2343																								8.85	38.94
																	9.67	36.1116																								8.57	28.2829
																	8.21	36.2452																								9.29	25.704
																	8.85	36.1061																								8.96	24.2241
																	8.8	34.2941																								9.68	28.1952
																	8.835	33.2972																								9.27	30.7256
																	9.065	36.2647																								9.13	24.3588
																	8.065	36.9843																								8.99	27.5568
																	8.75	35.1499																								9.39	29.1016
																	8.135	35.1682																								9.52	26.2584
																	8.09	33.1894																								8.94	27.5698
																	7.805	36.1269																								9.53	29.5348
																	7.95	36.1088																								9.2	31.6419
																	8.415	33.3168																								9.3	26.2935
																	10.12	33.1578																								9.08	26.8464
																	10.73	33.1509																								9.57	26.8462
																	10.585	35.1414																								9.7	31.5621
																	9.44	32.3294																								9.16	30.8534
																	9.215	33.4875																								9.42	31.6013
																	8.455	33.1765																								9.5	30.3808
																	8.185	34.9845																								9.31	28.2744
																	9.235	33.3203																								9.22	27.0869
																	9.305	33.1819																								9.13	28.0772
																	9.02	35.1161																								9.2	27.0003
																	8.535	32.3685																								9.51	30.2406
																	8.94	33.9168																								8.95	28.8461
																	9.33	33.9104																								8.87	28.8999
																	9.45	32.8796																								9.2	28.2823
																	8.96	34.8907																								9.54	29.1124
																	9.575	33.9328																								9.03	29.5497
																	9.415	32.9447																								8.71	30.2474
																	8.55	33.7917																								9.24	33.4808
																	8.845	33.9246																								9.74	33.5477
																	9.58	33.8418																								9.58	29.1124
																	9.39	33.8996																								9.38	26.2875
																	9.88	35.8621																								9.61	26.6488
																	8.99	35.8047																								9.21	30.378
																	9.335	33.9112																								9.39	33.6364
																	8.55	33.7981																								8.89	29.5664
																	9.69	33.9194																								9.32	28.2423
																	8.845	33.8512																								8.44	28.8601
																	9.96	32.9339																								8.43	27.5829
																	9.78	33.9121																								7.75	28.8656
																	9.78	33.9147																								9.02	29.5511
																	10.31	35.807																								8.76	28.8398
																	10.06	33.9194																								8.8	29.6007
																	9.89	33.9156																								8.46	30.817
																	9.975	32.8591																								9.12	29.5445
																	10.12	34.8328																								9.52	28.8446
																	9.96	33.9319																								9.18	30.3268
																	10.43	35.8736																								8.8	30.3312
																	10.215	34.8958																								9.09	28.8494
																	10.135	35.8835																								9.14	26.3062
																	10.47	34.8334																								9.3	28.8697
																	9.74	33.9211																								8.57	27.9356
																	9.02	33.9211																								9.18	31.1047
																	9.17	35.0085																								9.38	25.5397
																	9.58	34.0078																								8.92	27.5249
																	9.33	34.9755																								9.33	25.5071
																	7.65	34.0078																								9.68	26.2496
																	8.53	33.8542																								9.38	27.5306
																	8.34	32.9231																								8.97	25.6401
																	8.04	34.0124																								9.38	28.1881
																	8.32	33.9147																								9.49	27.9654
																	7.36	32.9312																								9.3	25.7757
																	7.8	33.9156																								9.22	30.3194
																	7.01	34.9014																								10.17	26.2599
																	7.51	34.8422																								9.45	27.8485
																	6.88	33.8512																								9.99	26.1904
																	6.99	36.7781																								10.65	22.9378
																	7.44	36.8044																								9.92	30.14
																	9.02	34.8791																								10.32	26.247
																	9.6	34.889																								9.65	22.8871
																	9.7	34.8474																								10.19	24.2166
																	8.58	35.8285																								10.39	29.0823
																	8.52	32.8616																								9.77	30.1467
																	7.57	34.8428																								10.16	25.0407
																	7.46	34.8328																								10.47	28.1745
																	8	34.8334																								9.95	26.152
																	7.95	34.8907																								10.49	30.2934
																	7.8	33.8536																								10.65	27.5584
																	7.68	34.8932																								9.63	29.5588
																	8.01	37.6564																								10.11	28.0772
																	7.95	34.295																								10.33	28.8048
																	8.1	35.1795																								9.8	24.2352
																	7.46	34.3696																								10.1	28.9996
																	8.56	35.7656																								10.57	28.8098
																	8.45	34.3754																								10.2	24.1943
																	8.02	36.6499																								10.27	28.8251
																	8.03	36.1805																								10.18	27.8617
																	8.42	34.7834																								10.01	22.9742
																	8.07	34.7902																								10.53	30.8935
																	8.76	35.7477																								9.8	21.6458
																	7.67	35.3583																								10.26	25.8507
																	8.18	34.0919																								10.26	26.9917
																	7.12	36.7557																								9.8	24.9938
																	8.81	37.4004																								10.41	26.229
																	7.55	36.0486																								10.12	28.3037
																	8.92	32.7706																								10.53	27.6619
																	8.72	33.5157																								10.41	26.6132
																	8.54	35.4627																								10.31	26.3141
																	8.64	34.4923																								10.15	28.3164
																	8.77	36.6047																								10.26	26.2081
																	9.01	34.4691																								9.84	27.5283
																	8.86	38.2039																								10.53	30.6583
																	8.74	33.5136																								10.8	22.9408
																	8.95	37.3852																								10.81	23.5679
																	8.35	34.3022																								10.64	30.3393
																	8.71	34.2913																								10.7	25.5253
																	8.79	37.0774																								10.51	28.2783
																	8.87	33.5157																								10.03	23.7703
																	8.54	37.3767																								10.7	26.9751
																	9.14	35.2621																								10.7	27.4996
																	9.39	35.252																								10.26	28.1784
																	9.63	35.4334																								10.17	27.0208
																	9.19	37.392																								10.98	29.9312
																	7.88	35.4393																								11	28.7608
																	8.83	33.1856																								10.92	24.573
																	8.8	37.2178																								11.23	23.7703
																	8.23	34.2993																								10.88	25.532
																	8.28	37.0985																								11.63	27.0624
																	7.47	35.4276																								11.11	25.5171
																	8.04	37.5896																								10.45	24.9488
																	7.22	38.2102																								11.4	28.3497
																	7.68	36.4047																								10.91	26.7457
																	7.25	35.9534																								11.43	24.9983
																	7.13	34.1354																								12.08	24.9155
																	7.82	35.126																								11.32	24.58
																	9.31	35.252																								11.22	26.5959
																	9.66	38.0584																								11.85	26.2189
																	9.81	38.0716																								10.58	26.8063
																	8.77	35.1077																								10.61	24.2477
																	8.24	35.2895																								11.69	24.2501
																	7.34	36.25																								11.53	24.9332
																	7.39	36.1296																								11.58	26.1802
																	8.37	35.4471																								11.33	25.4773
																	8.23	37.2339																								11.25	25.8157
																	8.11	37.4176																								11.44	24.9614
																	8.14	35.901																								10.84	26.7104
																	8.35	31.7912																								11.38	36.6394
																	8.24	32.7743																								11.55	32.9912
																	8.6	32.7938																								11.28	41.1745
																	7.81	34.7894																								11.2	37.8334
																	8.38	32.8005																								9.54	35.7806
																	8.19	34.8008																								10.67	33.3507
																	8.18	35.7741																								11.21	30.4475
																	7.65	37.788																								10.79	33.8038
																	8.51	36.7679																								11.35	38.3384
																	8.16	35.7756																								10.94	36.282
																	9.08	35.7551																								9.2	37.0364
																	7.83	32.7483																								9.45	31.6602
																	8.14	34.7906																								9.69	29.2185
																	7.48	35.7642																								9.48	39.0095
																	8.61	34.7795																								9.33	39.5217
																	6.7	32.8008																								9.35	34.9883
																	8.98	34.7801																								9.37	32.4001
																	9.35	36.7434																								9.72	30.9452
																	9.01	34.7656																								9.33	29.6892
																	9.12	33.7618																								9.46	37.0934
																	9.64	36.7568																								9.16	40.4066
																	9.33	33.7537																								9.47	29.1703
																	7.75	34.7458																								9.15	28.749
																	8.66	32.7779																								9.55	25.7477
																	8.75	31.7957																								8.8	31.6336
																	8.32	31.8068																								9.26	36.1484
																	8.33	31.8206																								9.31	27.6653
																	7.39	34.7719																								9.21	28.8703
																	7.94	31.7761																								9.47	35.7462
																	7.32	32.7809																								9.19	27.5283
																	7.56	34.7656																								9.74	33.6437
																	7.08	33.7619																								9.34	31.7228
																	7.05	32.768																								9.37	31.7866
																	7.52	31.8082																								9.58	27.4939
																	9.33	34.7656																								9.42	26.5845
																	9.79	32.8028																								9.49	25.8891
																	9.86	31.9839																								9.64	22.2269
																	8.46	32.0565																								10.16	27.9245
																	8.61	33.9395																								10.47	34.5256
																	7.84	34.9167																								10.01	23.7229
																	7.57	33.9278																								10.82	25.8157
																	8.2	33.919																								10.42	23.02
																	8.14	33.9307																								9.76	25.4522
																	7.96	36.971																								9.53	29.9584
																	7.66	32.9988																								9.99	29.8865
																	8.12	32.9008																								10.31	29.1144
																	8.09	30.0597																								10.4	25.5496
																	8.39	32.0438																								10.57	31.1021
																	7.7	36.8721																								10.63	32.1556
																	9.13	32.1599																								10.45	26.2897
																	8.67	33.0187																								10.11	32.0377
																	8.27	32.9454																								10.68	31.1108
																	8.17	32.9355																								9.37	30.432
																	9.1	31.9496																								10.35	26.5629
																	8.54	33.0196																								9.82	26.853
																	8.8	30.0379																								10.21	25.6699
																	8.12	34.001																								8.99	26.8938
																	8.57	32.9336																								8.56	30.207
																	7.29	33.9984																								8.58	29.5382
																	8.29	33.8974																								8.7	26.2471
																	7.41	32.9578																								8.79	35.5054
																	8.86	32.0447																								9.29	29.5284
																	8.97	33.0304																								8.4	31.5707
																	8.71	33.0178																								9.23	27.6099
																	9.14	38.0516																								9.12	27.8694
																	9.12	36.012																								8.93	26.9838
																	9.06	36.007																								9.19	32.3465
																	9.33	30.0736																								8.51	28.8383
																	9.47	31.9807																								9.02	30.3284
																	9.1	35.9842																								8.42	30.8184
																	9.37	35.8993																								8.68	30.9044
																	9.23	36.0362																								8.63	40.4361
																	9.15	35.0054																								8.51	35.1244
																	9.19	33.9345																								8.26	37.5326
																	8.93	35.9787																								8.75	39.5873
																	10.1	36.0072																								8.88	39.0577
																	10.14	36.8773																								9.13	32.8589
																	10.38	32.8486																								9.16	37.5134
																	10.32	36.9666																								9.08	33.7384
																	8.51	33.9237																								8.57	38.913
																	9.49	35.8869																								9.11	32.7664
																	8.37	35.9885																								8.26	38.4129
																	9.13	35.9346																								8.75	36.2072
																	9.21	35.9009																								9.39	38.9646
																	8.42	35.8819																								8.73	35.7297
																	8.82	36.4278																								8.35	38.9942
																	7.98	36.9536																								10.03	38.0743
																	8.29	32.8784																								10.03	29.505
																	7.3	34.8323																								10.73	33.8613
																	8.1	32.866																								10.14	38.9966
																	8.47	32.8498																								10.2	35.0783
																	10.1	33.9138																								10.13	34.2927
																	10.63	35.4908																								9.81	38.9608
																	10.66	36.9536																								10.09	39.6085
																	9.62	36.9744																								9.99	35.6194
																	9.51	35.797																								10.86	32.8348
																	8.66	36.3784																								9.86	39.6188
																	8.23	37.8335																								10.2	36.9827
																	9.13	36.8626																								10.08	37.5828
																	9.15	31.8634																								10.16	40.256
																	9.18	35.8827																								9.01	40.2425
																	8.55	36.8733																								8.67	38.235
																	9	34.9031																								9.63	37.6306
																	8.58	36.8931																								9.98	30.1601
																	9.39	33.85																								9.74	35.7069
																	8.84	35.91																								8.84	30.1535
																	9.74	36.8757																								8.85	27.0808
																	9.64	35.8852																								9.74	31.5414
																	9.29	35.8279																								8.23	33.7398
																	8.39	36.4163																								8.6	33.1946
																	9.8	36.4259																								8.99	31.6548
																	9.18	31.7995																								9.41	31.0078
																	9.82	34.3894																								9.2	27.6404
																	8.85	31.8845																								9.08	32.1673
																	9.28	32.8579																								8.68	38.9182
																	8.24	35.8951																								9.15	36.2367
																	9.48	32.3566																								9.41	37.0552
																	8.1	32.8799																								10.12	37.0248
																	9.48	34.8246																								9.5	40.3778
																	9.68	31.9148																								8.88	38.2085
																	9.59	31.8771																								9.2	32.8643
																	10.14	35.8844																								9.33	28.928
																	10.1	32.9294																								9.69	30.9889
																	9.85	35.8918																								9.93	28.1778
																	9.91	31.964																								9	28.2125
																	9.8	33.7981																								9.88	34.842
																	10.03	35.8852																								9.89	29.6204
																	9.9	34.1565																								9.76	26.9066
																	9.83	35.002																								9.66	30.316
																	9.99	34.9246																								9.63	28.2131
																	9.54	35.8885																								10.01	29.6136
																	9.59	34.9074																								10.32	30.8814
																	8.36	34.913																								9.92	33.23
																	7.99	35.8869																								10.52	33.2352
																	8.68	34.8966																								10.19	30.1467
																	9.12	36.888																								9.93	28.9069
																	8.07	35.8885																								9.85	32.1652
																	8.705	34.9164																								9.93	27.6127
																	8.57	35.8174																								10.36	28.2258
																	8.375	35.9535																								10.35	24.9605
																	8.65	35.8081																								9.7	28.8461
																	8.25	32.0242																								9.96	30.1401
																	8.43	35.8844																								10.27	25.7616
																	8.07	34.8932																								10.39	26.853
																	8.325	35.0142																								10.11	25.5486
																	7.85	35.9058																								10.81	26.8395
																	7.89	35.9962																								10.14	30.1199
																	7.615	33.0354																								10.35	25.4766
																	9.01	33.0907																								10.83	22.2275
																	9.55	33.0488																								10.14	24.9569
																	9.48	35.0142																								10.2	22.8811
																	8.45	33.8752																								10.27	27.7758
																	8.44	34.0159																								10.44	26.8395
																	7.76	34.0026																								9.64	24.1441
																	7.7	31.2132																								10.59	27.7801
																	8.38	34.0235																								10.51	28.2289
																	8.37	33.9927																								10.38	27.5539
																	7.94	34.8966																								10.2	26.1471
																	7.31	34.8462																								10.37	27.5045
																	7.52	34.8949																								10.65	28.2847
																	8.14	34.91																								10.31	26.7193
																	8.27	34.8966																								10.05	24.3007
																	7.52	34.9173																								10.73	25.5274
																	8.7	34.9272																								10.09	25.5265
																	8.51	36.865																								10.53	19.6842
																	8.34	36.8658																								10.34	20.913
																	7.63	34.928																								10.62	26.1801
																	8.75	32.133																								10.85	26.1426
																	8.37	32.1677																								10.36	29.1294
																	8.58	31.2243																								10.94	25.3932
																	7.94	34.0246																								10.87	24.2807
																	8.65	33.9381																								11.46	30.884
																	7.46	33.9319																								10.96	26.1844
																	8.04	34.9865																								11.04	30.0864
																	7.06	34.87																								10.98	29.5348
																	8.15	34.0037																								11.37	26.6371
																	8.99	35.013																								10.77	24.8494
																	8.53	35.0043																								9.58	25.7487
																	8.86	34.9823																								9.91	21.7082
																	8.73	33.0698																								10.82	30.0135
																	8.81	34.9156																								10.28	24.1796
																	9.13	35.8835																								11.12	30.1802
																	8.88	35.0096																								10.48	30.4112
																	9.04	36.2402																								10.86	37.088
																	9.11	31.0444																								10.99	35.6839
																	9.02	35.0031																								10.58	39.6755
																	8.97	33.1834																								11	40.9278
																	8.67	31.0778																								10.92	34.2291
																	7.54	35.2683																								10.67	36.9558
																	9.4	35.2848																								11.5	36.9354
																	8.26	34.3333																								11.13	40.9146
																	8.88	35.2797																								11.09	37.5794
																	8.75	34.1507																								10.93	34.3698
																	8.54	35.1302																								10.77	39.0798
																	8.96	33.1578																								10.82	39.6099
																	7.75	35.1161																								11.26	43.6656
																	8.37	35.0993																								11.06	38.9343
																	7.56	36.2582																								10.95	36.8885
																	7.95	34.1623																								11.18	36.2752
																	7.3	33.0378																								11.14	36.3044
																	7.61	33.1834																								10.89	36.8079
																	7.68	34.5019																								10.81	35.5522
																	9.53	36.1017																								11.22	37.566
																	10.33	35.1386																								8.82	41.6009
																	10.08	35.1288																								8.5	36.8884
																	8.96	35.2993																								8.13	43.7244
																	8.92	33.3444																								9.03	38.2145
																	8.55	34.3115																								8.56	40.9278
																	8.26	35.2797																								9.05	35.0449
																	8.93	32.0489																								9.25	34.9241
																	8.8	34.9705																								8.62	30.4475
																	8.77	33.9852																								8.67	39.596
																	7.9	33.9974																								8.82	40.8486
																	8.56	36.093																								8.54	41.6741
																	8.74	36.1031																								9	40.8882
																	8.72	36.1075																								8.76	37.6685
																	8.02	35.0993																								8.82	39.0543
																	9.27	37.2422																								9.39	32.9188
																	8.73	34.9944																								9.11	40.9756
																	8.75	35.1232																								8.99	38.2481
																	8.05	35.1288																								9.2	45.7114
																	9.04	35.2716																								9.18	41.6533
																	9.15	31.9334																								8.79	38.309
																	9.29	32.0539																								9.06	38.2547
																	9.5	36.11																								8.98	36.4886
																	9.51	33.0354																								9.35	39.5591
																	7.89	35.2881																								8.66	39.9034
																	8.83	36.0987																								8.51	37.6603
																	8.85	31.9272																								9.16	34.8868
																	8.48	32.8337																								8.88	39.6031
																	8.87	35.0031																								9.3	36.9086
																	7.63	35.1429																								8.99	38.3481
																	8.46	35.0119																								8.94	39.6352
																	7.23	35.0993																								8.76	34.2526
																	7.9	36.2549																								9.31	32.9224
																	7.38	36.1061																								8.99	39.095
																	7.07	31.9381																								9.57	38.3338
																	7.82	33.984																								9.36	40.3339
																	9.18	34.9671																								9.37	38.1562
																	9.82	38.4069																								8.95	34.2798
																	9.93	29.9127																								8.97	32.8019
																	8.96	33.7477																								9.06	28.2877
																	8.8	33.9764																								8.67	28.6891
																	8.01	33.0324																								8.63	27.4664
																	8.06	35.8907																								8.7	28.1303
																	8.63	32.5268																								9.12	28.8203
																	9.03	31.6161																								9.35	28.2306
																	8.41	31.5835																								8.94	57.8733
																	8.02	31.3799																								9.3	55.8621
																	8.66	33.5198																								9.02	30.2004
																	8.51	31.3915																								9.1	30.8857
																	8.64	31.5791																								8.42	31.6347
																	8.08	31.3893																								8.81	31.08
																	9.27	32.3306																								8.92	31.6141
																	8.87	32.79																								9.09	30.8855
																	8.49	32.3208																								8.79	28.772
																	8.21	31.3893																								9	32.1868
																	9.14	32.3404																								8.97	29.4873
																	8.6	31.3855																								8.95	29.6181
																	9.4	31.5932																								10.27	28.6971
																	8.62	32.7923																								10.11	23.4231
																	8.7	31.5726																								9.83	28.5712
																	7.86	30.944																								10.25	31.6397
																	8.71	32.5301																								10.33	28.1938
																	8.09	35.9193																								9.84	32.1673
																	9.09	34.4772																								9.83	27.5306
																	9.3	36.8757																								9.96	27.9058
																	8.95	32.5429																								9.9	30.7604
																	9.6	33.5101																								9.84	24.8932
																	9.41	33.4886																								9.95	29.8572
																	9.45	31.3915																								9.57	25.8195
																	9.51	32.5483																								9.63	26.6975
																	8.67	31.5932																								9.77	26.7421
																	9.1	30.2274																								9.84	29.9223
																	9.275	31.3834																								9.75	28.3735
																	9.15	30.4164																								10.22	22.9793
																	7.56	31.5738																								9.56	27.0327
																	8.32	32.5483																								9.9	25.5415
																	8.08	31.3563																								9.8	26.2539
																	7.94	32.1923																								9.93	31.6082
																	8.22	31.378																								10.2	31.7011
																	7.35	31.5867																								9	32.4045
																	7.71	32.3404																								8.85	26.5788
																	6.85	31.1933																								8.83	32.2497
																	7.38	34.5161																								8.8	28.9846
																	6.655	31.2079																								9.22	30.8611
																	6.93	36.6209																								9.03	27.4777
																	7.32	35.449																								9.43	29.6017
																	8.935	35.6662																								9.22	25.7808
																	9.59	32.5614																								9.18	32.9167
																	9.76	34.4849																								8.93	32.2057
																	8.63	34.4966																								9.1	27.6062
																	8.32	31.2129																								9.58	30.1735
																	7.4	32.352																								9.24	24.3202
																	7.2	30.2356																								9.28	32.1177
																	7.75	33.4845																								9.32	30.8257
																	7.78	31.3758																								9.44	34.8367
																	7.61	33.1698																								9.03	27.7503
																	7.33	34.213																								9.34	29.8776
																	7.68	33.8227																								9.55	29.4842
																	7.55	35.1968																								9.04	30.8071
																	8.08	34.0876																								9.5	25.6991
																	7.31	34.0692																								9.58	30.1268
																	8.42	34.0238																								9.21	26.8261
																	8.31	34.0165																								9.22	32.4126
																	7.9	36.6649																								9.29	31.5293
																	7.52	33.5914																								9.67	32.8568
																	8.34	33.5868																								9.16	26.7859
																	7.75	33.1755																								8.87	31.801
																	8.58	33.7461																								8.94	28.2289
																	7.59	34.6362																								8.9	30.8403
																	8.05	34.807																								8.99	29.1071
																	6.945	36.1058																								9.28	26.2856
																	8.215	34.3316																								9.22	28.9801
																	7.74	36.2516																								9.44	32.1449
																	8.865	36.2729																								9.03	33.4875
																	8.26	36.428																								9.51	28.9473
																	8.21	35.6724																								9.17	26.8597
																	8.71	35.2915																								9.27	32.2748
																	8.62	36.2354																								9.27	26.2394
																	8.44	35.1485																								9.17	30.7627
																	9.08	36.2353																								8.69	32.2748
																	8.595	36.2565																								8.95	26.8935
																	8.86	36.1043																								8.23	27.7167
																	8.91	35.2929																								8.45	27.4955
																	8.25	34.9925																								9.51	26.2806
																	8.54	36.0974																								8.93	28.2733
																	8.68	36.0932																								9.91	28.751
																	8.3	34.9944																								9.74	26.2523
																	8.91	35.1358																								9.46	28.294
																	9.23	36.0875																								9.41	38.2285
																	9.29	35.2929																								9.61	40.3292
																	8.82	37.0931																								10.09	40.936
																	7.07	37.0891																								10.16	35.5118
																	8.16	35.1133																								8.64	34.882
																	8.16	36.0861																								8.79	42.2463
																	7.67	36.1004																								8.53	32.4058
																	8.06	34.1634																								9.61	40.8708
																	6.96	34.1423																								8.8	36.8683
																	7.59	35.2733																								9.45	36.9623
																	6.72	35.2814																								10.31	34.521
																	7.15	36.1072																								10.59	39.6574
																	6.6	31.9362																								10.26	39.5163
																	6.8	31.9263																								10.34	38.4183
																	7.16	31.9362																								10.41	45.1079
																	9	31.9343																								10.48	37.9524
																	9.28	37.2324																								10.3	35.5661
																	9.58	31.9371																								11.12	38.4568
																	8.17	32.9159																								10.08	33.7372
																	7.69	33.0279																								10.46	37.0588
																	7.14	32.1913																								10.16	40.2724
																	6.93	33.0279																								10.47	40.8911
																	7.44	33.3328																								10.37	38.2291
																	7.78	34.8958																								10.81	44.2209
																	7.54	30.9652																								10.84	40.9531
																	7.33	30.9745																								10.17	38.8765
																	7.93	33.0394																								10.73	39.5353
																	7.5	31.9252																								11.1	34.6894
																	7.78	31.9046																								10.77	29.9466
																	7.15	30.9177																								10.49	34.8656
																	7.93	32.0329																								10.79	38.9279
																	7.99	35.103																								10.05	38.9435
																	7.71	34.141																								10.59	36.0668
																	7.28	33.0349																								10.77	31.7061
																	8.24	33.0105																								10.79	39.0243
																	7.78	30.9508																								11.2	38.2762
																	8.3	33.0268																								11.1	39.579
																	7.65	35.1206																								11.2	34.7091
																	7.76	30.9751																								10.76	45.8683
																	6.89	30.9645																								10.66	42.0059
																	7.95	29.9298																								11.08	41.7556
																	7.29	31.9232																								10.54	39.6341
																	7.72	31.9596																								10.71	33.0069
																	8.27	32.9349																								10.61	38.782
																	7.64	32.953																								10.98	36.2783
																	8.38	34.0045																								10.53	30.9627
																	8.55	35.0185																								10.82	35.3976
																	8.64	32.9653																								10.35	35.4504
																	8.54	31.867																								10.61	41.6542
																	8.02	31.9325																								10.8	39.3264
																	8.55	33.8671																								10.67	33.3946
																	8.37	33.8871																								10.61	42.6931
																	8.04	32.9008																								10.48	40.4806
																	8.41	36.9559																								10.42	39.6165
																	8.25	35.8795																								10.68	42.6201
																	8.13	34.9036																								10.13	41.7135
																	9.14	32.8796																								10.48	39.9132
																	8.97																									10.86	38.587
																	10																									10.93	36.2945
																	9.11																									10.54	40.5511
																	7.58																									11	33.3331
																	8.21																									10.92	39.5577
																	8.28																									10.67	38.3975
																	7.97																									11.37	40.4776
																	7.88																									11.13	36.1747
																	7.2																									10.98	41.3778
																	7.88																									10.8	44.0064
																	7.02																									10.77	38.1444
																	7.3																									10.82	34.1002
																	6.91																									11.26	43.484
																	7.09																									10.75	37.2558
																	7.74																									10.95	41.4588
																	9.13																									10.99	39.1843
																	9.55																									11.25	47.0033
																	9.58																									10.83	45.6499
																	8.53																									10.81	37.2147
																	8.26																									11.27	41.4083
																	7.56																									11.13	38.1804
																	7.04																									10.84	31.6497
																	7.7																									11.48	36.3252
																	8.03																									11.18	38.2514
																	7.67																									11.08	36.3286
																	7.14																									11.39	37.8296
																	8.11																									11.44	36.9761
																	8.02																									11.44	37.6859
																	7.98																									11.09	35.0916
																	7.82																									11.39	40.2023
																	8.51																									11.41	38.3566
																	8.65																									10.93	39.0256
																	7.93																									10.88	39.8976
																	7.73																									11.07	36.4979
																	8.48																									10.57	33.63
																	7.92																									11.09	29.5469
																	8.45																									11.07	31.5852
																	7.77																									10.69	37.5853
																	7.95																									11.16	33.6726
																	6.95																									10.76	30.9059
																	8.36																									10.46	28.2765
																	7.23																									10.94	27.4841
																	8.7																									10.84	28.1625
																	8.56																									11.02	27.0209
																	8.52																									10.56	24.2761
																	8.56																									9.54	32.3172
																	8.68																									10	29.5146
																	8.65																									10.08	25.6473
																	8.72																									9.93	27.4824
																	8.83																									9.52	29.4705
																	8.51																									10.39	23.775
																	8.78																									9.98	29.4521
																	8.44																									9.91	27.494
																	8.83																									9.98	26.1991
																	8.71																									9.63	27.8573
																	8.15																									9.09	23.5328
																	9.05																									10.34	27.5306
																	8.98																									10.15	24.8557
																	9.21																									9.13	25.5132
																	8.95																									10.04	26.7724
																	7.64																									9.8	27.768
																	8.38																									9.53	26.9835
																	8.08																									10.09	28.1681
																	7.76																									10.03	24.1756
																	7.81																									9.69	25.5009
																	7.27																									9.78	25.5062
																	7.62																									10.21	28.9989
																	6.88																									9.95	25.4462
																	7.35																									10.5	27.8606
																	7.06																									10.28	25.4754
																	6.61																									10.2	25.02
																	7.17																									10.71	27.4489
																	8.99																									10.36	26.1395
																	9.53																									9.85	28.1617
																	9.53																									10.36	29.4905
																	8.56																									10.38	24.8968
																	8.21																									9.38	25.1326
																	7.39																									9.79	25.4683
																	7.37																									9.99	30.1064
																	7.87																									10.57	28.8041
																	7.88																									10.09	28.7447
																	7.76																									10.53	25.4487
																	7.33																									10.42	24.8141
																	7.88																									10.16	19.5647
																	7.81																									9.9	20.4423
																	8.17																									9.62	21.7124
																	7.52																									10.11	26.8395
																	8.36																									9.81	26.2651
																	8.16																									9.94	24.8748
																	8.08																									10	26.8665
																	7.19																									9.91	26.5462
																	8.64																									8.85	27.8541
																	7.89																									9.07	21.6379
																	8.2																									8.84	23.6915
																	7.95																									9.02	24.2698
																	8.08																									9.23	26.193
																	6.87																									9.44	30.1802
																	7.91																									9.09	26.1991
																	6.99																									9.01	22.9014
																	8.13																									9.21	29.4917
																	8.38																									9.16	27.3888
																	7.92																									9.23	27.0333
																	8.38																									9.07	26.2187
																	8.61																									8.89	28.3879
																	8.45																									8.89	22.2357
																	8.63																									9.03	28.2289
																	8.61																									9.21	25.5274
																	8.57																									9.4	27.4996
																	8.71																									9	30.8418
																	8.6																									8.97	29.1234
																	8.41																									9.33	27.0666
																	8.33																									9.13	35.3028
																	8.09																									9.75	28.1817
																	8.445																									9.27	24.3115
																	8.07																									9.27	24.2875
																	8.83																									9.7	28.1802
																	9																									8.94	29.1371
																	8.02																									8.78	28.8812
																	8.705																									9.58	28.4655
																	8.62																									9.9	30.3194
																	8.47																									9.72	26.2101
																	8.685																									9.83	27.0669
																	8.145																									9.98	27.095
																	8.205																									9.02	31.4183
																	7.985																									9.52	25.7395
																	8.04																									9.96	27.5851
																	7.8																									9.66	29.5877
																	7.73																									9.42	28.2435
																	7.8																									9.5	30.3268
																	9.15																									9.57	34.1685
																	9.57																									10.06	26.9716
																	9.48																									10.16	31.7852
																	8.25																									9.16	28.2138
																	7.88																									9.74	30.2996
																	7.56																									9.79	28.8804
																	7.44																									8.42	30.3312
																	8.51																									9.75	27.0584
																	8.32																									9.76	29.5976
																	7.97																									9.73	29.6362
																	7.74																									9.19	27.5306
																	7.82																									8.66	27.0167
																	8.07																									8.65	29.1234
																	8.72																									9.66	30.9133
																	7.95																									8.78	30.8651
																	8.81																									8.82	29.7759
																	8.46																									8.09	32.1652
																	8.29																									8.44	27.5119
																	7.36																									8.43	28.7838
																	8.79																									10.21	30.2374
																	8.15																									8.85	30.8637
																	8.55																									9.16	30.8695
																	7.92																									9.75	29.6098
																	8.51																									10.44	27.896
																	7.08																									9.77	26.2496
																	7.96																									9.24	28.337
																	7.08																									10.38	27.5693
																	8.4																									10.6	30.1003
																	8.8																									10.62	30.8141
																	8.37																									10.29	29.536
																	8.72																									10.34	29.5132
																	8.55																									10.23	28.1778
																	8.82																									10.29	28.8609
																	8.93																									9.15	28.7947
																	8.69																									8.92	30.3158
																	8.94																									8.66	26.7859
																	9.02																									8.94	26.2882
																	8.72																									9.31	28.1497
																	8.71																									8.75	26.8664
																	8.5																									9.51	27.5805
																	8.37																									9.24	25.6591
																	9.14																									9.92	28.2738
																	7.89																									9.61	31.5288
																	8.64																									10.1	26.9959
																	8.53																									10.08	28.1945
																	8.06																									10.1	31.5137
																	8.52																									9.23	26.8664
																	7.33																									10.57	27.5781
																	7.72																									9.47	26.8395
																	6.74																									9.85	29.6471
																	7.55																									10.21	29.5923
																	6.95																									10.3	38.9602
																	7.21																									10.02	30.9023
																	7.53																									10.02	32.9359
																	8.62																									10.32	30.9728
																	9.55																									10.36	37.5732
																	9.71																									10.17	35.5719
																	8.56																									10.15	36.8885
																	8.18																									9.8	31.558
																	7.84																									9.9	33.5813
																	7.57																									10.1	34.2418
																	8.09																									9.44	34.2644
																	8.23																									10.17	34.5146
																	7.95																									9.36	33.6486
																	7.41																									10.16	36.2709
																	8.26																									9.55	35.606
																	8.23																									9.95	35.7549
																	8.28																									10.12	30.9701
																	7.51																									10.3	29.5725
																	8.81																									10.1	33.6352
																	8.77																									10.13	28.2784
																	8.43																									10.42	28.248
																	7.86																									10.27	31.6679
																	8.66																									10.04	30.1869
																	8.87																									10.04	32.9707
																	8.75																									9.93	30.3032
																	9.68																									9.53	34.1567
																	9.15																									10.05	38.9463
																	7.53																									10.23	38.9401
																	8.35																									10.09	32.2469
																	8.175																									10.15	32.2392
																	7.56																									9.75	39.6376
																	7.71																									10.76	36.9222
																	7.24																									10.3	32.7993
																	7.59																									9.9	27.6067
																	6.87																									10.25	26.2721
																	6.86																									10.48	25.2269
																	7.53																									10.39	28.2829
																	7.915																									9.84	34.8227
																	8.18																									10.53	27.8904
																	8.78																									10.68	28.228
																	9.41																									10.81	28.2531
																	9.39																									10.64	27.6084
																	8.28																									10.4	28.1736
																	7.81																									10.51	30.0796
																	7.16																									10.29
																	7.17																									10.7
																	7.795																									10.79
																	7.97																									10.26
																	7.5																									9.76
																	7.14																									10.98
																	7.73																									11
																	7.78																									10.92
																	7.77																									11.23
																	7.37																									11.14
																	8.16																									11.63
																	8.26																									10.83
																	7.63																									10.45
																	7.5																									11.4
																	8.1																									9.04
																	7.655																									9.33
																	8.24																									8.66
																	7.69																									8.82
																	7.645																									8.88
																	6.63																									9.15
																	7.765																									8.99
																	7.07																									8.7
																	8.18																									8.54
																	8.06																									8.81
																	8.13																									9.12
																	8.13																									9.19
																	8.07																									8.58
																	8.53																									9.36
																	8.38																									9.22
																	8.48																									9.16
																	8.22																									9.2
																	8.64																									9.34
																	8.44																									8.82
																	8.35																									9.11
																	8.21																									9.15
																	7.67																									9.34
																	8.91																									8.78
																	9.03																									8.88
																	9.28																									8.9
																	8.97																									8.65
																	7.57																									8.65
																	8.3																									9.12
																	8.45																									8.9
																	7.59																									8.41
																	7.82																									8.78
																	7.54																									8.58
																	7.67																									9.04
																	6.88																									8.72
																	7.38																									9.28
																	7.05																									8.68
																	6.97																									9.35
																	7.43																									8.94
																	9.14																									9.37
																	9.46																									8.96
																	9.51																									9.06
																	8.52																									9.05
																	8.28																									9.03
																	7.51																									9.53
																	7.83																									9.35
																	8.17																									9.36
																	8.18																									9.38
																	7.69																									9.06
																	7.28																									9.32
																	7.93																									9.72
																	7.81																									9.4
																	8.18																									9.48
																	7.53																									9.78
																	8.27																									9.8
																	8.06																									9.42
																	8.05																									8.87
																	7.04																									9.38
																	8.48																									9.04
																	7.77																									9.24
																	8.01																									9.77
																	7.72																									9.51
																	8.2																									9.6
																	6.86																									9.29
																	7.72																									9.48
																	6.54																									8.6
																	7.75																									9.55
																	8.12																									9.12
																	7.76																									9.35
																	8.21																									9.41
																	8.24																									9.02
																	8.25																									9.12
																	8.94																									9.56
																	8.55																									9.25
																	8.22																									9.47
																	8.31																									9.25
																	8.46																									9.75
																	8.13																									9.18
																	7.96																									9.12
																	7.76																									9.26
																	8.375																									8.93
																	8.01																									8.03
																	8.65																									8.93
																	8.5																									8.88
																	7.57																									8.82
																	8.245																									8.92
																	8.095																									8.95
																	7.875																									8.84
																	8.285																									9.17
																	7.755																									9.61
																	7.935																									8.8
																	7.55																									8.24
																	7.77																									9.48
																	7.54																									9.18
																	7.47																									9.13
																	7.745																									9.23
																	8.9																									9.3
																	9.49																									9.5
																	9.29																									10.69
																	8.27																									11.01
																	7.86																									11.46
																	7.52																									10.97
																	7.21																									10.44
																	7.57																									10.92
																	7.75																									11.02
																	7.25																									11.57
																	7.45																									10.93
																	7.4																									11.38
																	7.79																									11.24
																	8.12																									10.96
																	7.56																									11.39
																	8.32																									11.3
																	8.36																									11.02
																	8.07																									11.33
																	7.09																									11.03
																	8.27																									11.48
																	7.74																									11.1
																	8.17																									10.94
																	7.73																									11.11
																	8.19																									11.43
																	6.92																									11.06
																	7.77																									11.55
																	7.07																									11.46
																	8.18																									11.15
																	8.16																									11.23
																	7.81																									11.38
																	8.1																									11.25
																	8.07																									11.63
																	8.21																									11.14
																	8.51																									11.25
																	8.11																									10.78
																	8.18																									11.27
																	8.42																									10.84
																	8.25																									10.68
																	8.34																									10.99
																	8																									10.95
																	8.06																									10.9
																																										11.12
																																										10.65
																																										10.52
																																										11.08
																																										10.76
																																										10.95
																																										10.85
																																										10.95
																																										11.15
																																										11.23
																																										11.14
																																										10.28
																																										11.34
																																										11.07
																																										11.31
																																										11.23
																																										11.3
																																										10.76
																																										11.36
																																										11.02
																																										10.78
																																										10.53
																																										11.46
																																										11.22
																																										11.43
																																										11.28
																																										10.62
																																										11.73
																																										11.12
																																										11.35
																																										11.51
																																										11.47
																																										11.36
																																										11.72
																																										11.57
																																										11.38
																																										11.78
																																										11.73
																																										11.34
																																										11.11
																																										11.42
																																										11.53
																																										11.1
																																										11.67
																																										10.56
																																										10.84
																																										11.7
																																										11.25
																																										11.19
																																										11
																																										10.98
																																										10.93
																																										11.39
																																										10.45
																																										10.16
																																										10.73
																																										10.62
																																										10.62
																																										10.43
																																										10.58
																																										10.48
																																										10.47
																																										10.81
																																										10.3
																																										10.2
																																										9.99
																																										10.61
																																										10.68
																																										10.54
[truncated: 213 more rows]
