# Supplementary material for: Deciphering the actin structure-dependent preferential cooperative binding of cofilin
Source: eLife. 2024 Aug 2;13:RP95257. doi: 10.7554/eLife.95257 (PMC11296705; doi:10.7554/eLife.95257)
Supplement: Figure 9—source data 1. — These data are presented as origin plots in Figure 9B–D. [file elife-95257-fig9-data1.xlsx]

## Sheet: Figure 9
Figure 9B	F-ADP.Pi-actin				F-ADP-actin				F-ADP.Pi-actin				Independent t-Test on Data1 col(F-ADP.Pi-actin) and col(F-ADP-actin):							Figure 9D	HHP (F-ADP.Pi-actin)	HHP (F-ADP-actin)	HHP (F-actin+phalloidin)		Figure 9C	Bin_HHP	HHP (F-ADP.Pi-actin)	HHP (F-ADP-actin)	HHP (F-actin+phalloidin)		Calculate the fraction of naturally supertwisted half helices with HHP ≤ 30 nm									One-Way ANOVA on col(F-ADP-actin) -> col(F-actin+phallodin):
	lag time (s)	molecules/HHP	Growth Rate (molecules/HHP/s)		lag time (s)	molecules/HHP	Growth Rate (molecules/HHP/s)		Mean growth rate (molecules/HHP/s)	SD	N										35.1761	35.7491	36.1024			20.5	0	0	0			F-ADP.Pi-actin	F-ADP-actin	F-actin+phalloidin		Gaussian fit to Histgm1_F-ADP.Pi-actin:				Data	Mean	Variance	N
	17	11	0.647059		21	11	0.52381		8.29781	7.71474	28		Data	Mean	Variance	N					31.393	31.3143	41.344			21.5	0	0	0		a	12.502	46.2946	3.41097		Mean	SD	Curve area		F-ADP-actin	36.6703	14.3178	2487
	71.28	11	0.154321		6.5	11	1.69231						------------------------------------------------------------								40.2089	37.3607	35.7976			22.5	0	0	0		b/2	3.19491	4.66949	2.21186		36.9846	2.75773	2480.43		F-actin+phalloidin	36.9019	4.86564	2487
	3.3	11	3.33333		1	11	11						F-ADP.Pi-actin	8.29781	61.7216	28					39.025	38.9305	36.1611			23.5	0	1	0		Area under curve (nm^2)	26.6284	144.115	5.02974						F = 6.95754
	1	11	11		5	11	2.2		F-ADP-actin				F-ADP-actin	9.95856	72.8383	22					38.6509	36.4184	37.3094			24.5	0	5	0		Full curve area (nm^2)	2480.43	2489.34	2518.08		Gaussian fit to Histgm1_F-ADP-actin:				p = 0.00837
	3	11	3.66667		1.5	11	7.33333		Mean growth rate (molecules/HHP/s)	SD	N		------------------------------------------------------------								38.0886	35.2028	37.4526			25.5	0	8	0		Fraction (%)	1.07354	5.78928	0.199745		Mean	SD	Curve area		At the 0.05 level,
	12.5	11	0.88		13.5	11	0.814815		9.95856	8.33832	22		t = 0.71436								37.3058	36.4246	34.657			26.5	2	12	0							36.8675	3.76866	2489.34		the means are significantly different.
	2	11	5.5		3.5	11	3.14286						p = 0.47846								36.4969	38.0064	35.0885			27.5	2	22	0
	2.5	11	4.4		1	11	11														41.2777	38.7591	34.7882			28.5	9	23	0		a: Length along the axis					Gaussian fit to Histgm1_F-actin+Phalloidin:				One-Way ANOVA on col(F-actin+phalloidin) -> col(F-ADP.Pi-actin):
	2	11	5.5		5	11	2.2						At the 0.05 level,								38.7311	40.1341	39.5912			29.5	15	38	0		b: Length of chord					Mean	SD	Curve area		Data	Mean	Variance	N
	1.5	11	7.33333		0.5	11	22						the two means are NOT significantly different.								41.359	38.7431	35.31			30.5	25	47	4		A: Area under curve (A = 2/3*a*b/2)					37.0341	2.31076	2518.08		F-actin+phalloidin	36.9019	4.86564	2487
	4.5	11	2.44444		0.5	11	22														38.1557	37.6812	36.6623			31.5	56	104	28											F-ADP.Pi-actin	36.8629	7.71523	2487
	1.5	11	7.33333		1	11	11														38.9735	39.5512	41.7137			32.5	93	145	80											F = 0.30189
	3	11	3.66667		0.5	11	22														39.5396	44.2057	37.7346			33.5	158	177	120											p = 0.58272
	5.5	11	2		0.5	11	22														37.6979	37.6748	37.9851			34.5	240	212	272											At the 0.05 level,
	0.5	11	22		6	11	1.83333														34.9008	36.6768	37.9672			35.5	302	250	424											the means are NOT significantly different.
	0.5	11	22		1	11	11														38.2581	37.4155	38.6124			36.5	374	262	456
	1	11	11		0.5	11	22														39.2231	32.2472	40.3134			37.5	333	235	464											One-Way ANOVA on col(F-ADP-actin) -> col(F-ADP.Pi-actin):
	3	11	3.66667		0.5	11	22														38.2653	39.496	40.6403			38.5	319	246	416											Data	Mean	Variance	N
	0.5	11	22		16.66	11	0.660264														40.4762	38.8908	38.5804			39.5	225	215	276											F-ADP-actin	36.6703	14.3178	2487
	0.5	11	22		16	11	0.6875														41.85	38.7773	39.1903			40.5	176	194	160											F-ADP.Pi-actin	36.8629	7.71523	2487
	4.5	11	2.44444		1	11	11														39.7127	36.0444	35.7917			41.5	91	117	72											F = 4.18633
	5	11	2.2		1	11	11														38.7371	38.5025	37.6946			42.5	44	76	12											p = 0.0408
	1.5	11	7.33333																		40.3199	40.0825	39.3065			43.5	12	48	0											At the 0.05 level,
	0.5	11	22																		37.9196	38.6404	37.9632			44.5	7	25	0											the means are significantly different.
	1	11	11																		36.9647	35.3457	39.1174			45.5	3	12	0
	3.5	11	3.14286																		37.322	38.4528	39.1548			46.5	1	9	0
	0.5	11	22																		34.7506	37.1474	41.1225			47.5	0	2	0
	6.5	11	1.69231																		37.431	37.7907	40.8081			48.5	0	2	0
																					33.3745	40.9972	35.4436			49.5	0	0	0
																					37.3746	32.6571	38.5648			50.5
																					41.169	37.4414	35.8793
																					41.1239	37.0434	35.3582			Bin_HHP	HHP (F-ADP.Pi-actin)	HHP (F-ADP-actin)	HHP (F-actin+phalloidin)
																					38.0677	40.5191	37.0178			20.5	6.24958e-06	0.02113	3.31699e-09
																					38.7276	40.0532	38.2535			20.9915	1.78508e-05	0.03692	1.48566e-08
																					36.7495	39.0431	37.1488			21.483	4.93935e-05	0.06341	6.35978e-08
																					38.2616	41.7012	38.2408			21.9746	0.000132399	0.10708	2.60205e-07
																					41.8324	41.0749	32.4986			22.4661	0.000343798	0.17777	1.01751e-06
																					42.5604	38.3214	38.4461			22.9576	0.000864817	0.29014	3.80288e-06
																					39.3611	41.7852	38.709			23.4491	0.00211	0.46557	1.35842e-05
																					38.8317	41.14	37.9006			23.9407	0.00497	0.73446	4.63777e-05
																					37.9289	36.225	39.1249			24.4322	0.01138	1.1391	0.000151332
																					38.9792	40.7983	35.3483			24.9237	0.0252	1.73688	0.00047196
																					40.3247	42.0862	35.6795			25.4153	0.05409	2.6037	0.00141
																					39.6344	36.225	33.4758			25.9068	0.11244	3.83728	0.00401
																					42.3356	38.448	38.6286			26.3983	0.22645	5.55992	0.01091
																					38.8789	38.448	38.736			26.8898	0.44179	7.92001	0.0284
																					42.8867	38.2753	37.9629			27.3814	0.83497	11.0916	0.07063
																					39.39	40.3887	37.1378			27.8729	1.52871	15.2713	0.16792
																					39.3775	37.6198	37.6096			28.3644	2.71133	20.6715	0.38152
																					39.2116	41.4367	40.0195			28.8559	4.65848	27.5093	0.82848
																					42.5569	38.2688	39.4775			29.3475	7.7537	35.9913	1.71951
																					42.7194	43.1654	35.0632			29.839	12.502	46.2946	3.41097
																					38.3319	43.9602	39.014			30.3305	19.5276	58.5429	6.46695
																					37.6658	41.7852	37.178			30.822	29.5478	72.7831	11.7185
																					40.6651	46.3492	34.95			31.3136	43.3115	88.9609	20.2951
																					39.417	39.3954	39.0876			31.8051	61.5015	106.901	33.5941
																					40.4756	39.462	39.6783			32.2966	84.6001	126.292	53.1477
																					38.6195	41.3189	35.0084			32.7881	112.735	146.683	80.3629
																					42.4015	41.6293	35.559			33.2797	145.53	167.494	116.139
																					41.1507	39.1472	39.5063			33.7712	181.99	188.031	160.416
																					40.324	41.2311	38.0038			34.2627	220.468	207.526	211.772
																					43.0935	42.6175	39.02			34.7542	258.731	225.18	267.201
																					39.0334	42.2522	41.0393			35.2458	294.14	240.213	322.225
																					37.3072	44.5982	35.9751			35.7373	323.939	251.929	371.389
																					38.7456	39.856	39.9943			36.2288	345.601	259.759	409.119
																					37.9886	37.8054	35.5338			36.7203	357.183	263.315	430.745
																					36.1742	39.462	37.5365			37.2119	357.61	262.418	433.451
																					38.2513	41.6923	38.1151			37.7034	346.843	257.113	416.879
																					39.78	40.3887	38.07			38.1949	325.88	247.666	383.203
																					39.3857	40.2647	36.5233			38.6864	296.611	234.542	336.666
																					40.5086	35.5317	38.0537			39.178	261.529	218.368	282.695
																					38.3195	40.8044	38.0321			39.6695	223.386	199.88	226.876
																					41.6078	38.2753	36.0572			40.161	184.84	179.871	174.023
																					39.4876	42.0476	35.0243			40.6525	148.162	159.135	127.578
																					38.6655	44.3847	37.9734			41.1441	115.049	138.415	89.3914
																					37.1407	44.7772	38.7057			41.6356	86.5431	118.362	59.8638
																					35.7939	40.9664	37.02			42.1271	63.0646	99.5069	38.3163
																					40.3981	40.3113	39.0661			42.6186	44.5186	82.2446	23.4397
																					43.4238	35.8469	39.2403			43.1102	30.4439	66.8304	13.7047
																					40.0209	40.1155	38.0947			43.6017	20.168	53.3892	7.65842
																					40.9401	38.448	40.06			44.0932	12.9428	41.9319	4.09032
																					37.1769	34.6771	37.8876			44.5847	8.04636	32.3779	2.08798
																					41.5896	42.547	35.5101			45.0763	4.84587	24.579	1.01869
																					43.7272	38.0789	38.0295			45.5678	2.82715	18.3439	0.47502
																					43.0872	38.5389	35.9637			46.0593	1.59782	13.4596	0.2117
																					41.5702	40.7707	39.303			46.5508	0.8748	9.70928	0.09018
																					36.0232	38.1608	40.5591			47.0424	0.46398	6.88578	0.03671
																					38.5229	38.1608	40.6544			47.5339	0.23839	4.80099	0.01429
																					41.3087	40.5771	34.995			48.0254	0.11865	3.29095	0.00531
																					39.4991	40.8534	37.6354			48.517	0.05721	2.21781	0.00189
																					37.263	37.4233	35.6298			49.0085	0.02672	1.4694	0.000641482
																					40.8067	41.503	36.01			49.5	0.01209	0.95712	0.000208282
																					40.6959	42.6175	36.515
																					36.1917	40.8534	39.5386
																					42.1494	44.4325	34.1609
																					40.7566	43.0813	38.004
																					42.9363	41.6293	35.02
																					42.0439	39.9249	39.5787
																					44.322	40.3887	41.0172
																					42.1526	43.0813	37.5029
																					45.5541	39.8121	33.4989
																					40.6106	41.3824	40.6507
																					42.3194	39.6548	40.533
																					37.8906	38.6943	33.597
																					38.5161	38.8104	40.7359
																					40.9643	41.8868	36.0849
																					36.7007	41.836	40.2234
																					41.115	39.2747	37.5939
																					40.3806	40.2492	35.5666
																					42.6564	39.0544	37.0352
																					40.1676	40.7707	36.5139
																					36.8419	40.8534	39.5675
																					38.728	40.1155	40.5431
																					38.8255	42.8077	39.103
																					40.3634	39.579	39.4784
																					39.3072	38.8973	39.0428
																					42.5045	35.7491	41.0843
																					42.0712	31.3143	36.0683
																					38.2452	37.3607	38.2246
																					40.3806	38.9305	38.3221
																					39.6675	36.4184	34.226
																					39.4388	35.2028	36.9938
																					39.7235	36.4246	35.0436
																					40.0444	38.0064	36.639
																					36.8163	38.7591	36.1906
																					42.0333	40.1341	36.1219
																					38.7725	38.7431	38.4044
																					42.9893	37.6812	35.3086
																					37.4044	39.5512	36.7168
																					34.9531	44.2057	33.975
																					38.1173	37.6748	36.0578
																					38.6109	36.6768	31.7789
																					38.0326	37.4155	37.4225
																					35.9046	32.2472	40.3318
																					38.2388	39.496	40.7592
																					40.1193	38.8908	37.6166
																					38.7952	38.7773	40.1364
																					39.1901	36.0444	36.0663
																					40.2711	38.5025	34.6969
																					40.1358	40.0825	36.7334
																					40.6103	38.6404	33.7072
																					39.4391	35.3457	37.6602
																					39.1663	38.4528	35.5093
																					37.0746	37.1474	36.1633
																					38.2403	37.7907	38.1546
																					36.7096	40.9972	36.7956
																					38.2428	32.6571	37.1438
																					39.2044	37.4414	36.2944
																					40.1264	37.0434	39.158
																					42.1179	40.5191	37.7252
																					38.4922	40.0532	38.9177
																					37.3217	39.0431	35.5362
																					41.1066	41.7012	38.6705
																					36.8278	41.0749	35.8624
																					39.4391	38.3214	39.3173
																					38.2289	41.7852	38.0598
																					37.0746	41.14	34.6042
																					36.6426	36.225	36.0018
																					36.37	40.7983	35.5822
																					38.2428	42.0862	38.1835
																					36.9618	36.225	37.3386
																					39.1901	38.448	36.9917
																					38.5927	38.448	40.3058
																					38.4922	38.2753	40.5314
																					33.9054	40.3887	37.0335
																					41.1066	37.6198	40.0385
																					36.8654	41.4367	35.569
																					38.2616	38.2688	34.49
																					37.079	43.1654	35.49
																					38.7067	43.9602	36.0939
																					35.1836	41.7852	38.4674
																					36.3632	46.3492	37.034
																					38.5215	39.3954	36.2282
																					37.0601	39.462	40.0235
																					37.1701	41.3189	35.5185
																					36.7398	41.6293	34
																					36.1933	39.1472	36.0466
																					38.7403	41.2311	37.0457
																					39.6699	42.6175	39.0096
																					38.8357	42.2522	36.1583
																					37.4485	44.5982	33.0491
																					37.1127	39.856	37.6405
																					36.2393	37.8054	36.5751
																					38.7092	39.462	41.5287
																					39.0762	41.6923	39.6253
																					39.9263	40.3887	38.0684
																					36.1693	40.2647	38.0631
																					36.2528	35.5317	40.994
																					36.6207	40.8044	40.2989
																					38.8246	38.2753	38.4905
																					41.589	42.0476	41.2136
																					41.9204	44.3847	39.9293
																					39.5967	44.7772	40.1522
																					39.4099	40.9664	35.016
																					39.1732	40.3113	38.4864
																					38.9609	35.8469	38.1159
																					38.5085	40.1155	39.8072
																					37.8113	38.448	39.3266
																					37.8032	34.6771	42.0314
																					40.6418	42.547	40.6985
																					34.1229	38.0789	36.2591
																					37.5581	38.5389	37.1633
																					41.9106	40.7707	38.1489
																					38.2493	38.1608	41.2005
																					38.0279	38.1608	41.0417
																					42.5268	40.5771	36.9786
																					35.9218	40.8534	38.5182
																					41.1328	37.4233	37.0468
																					37.9178	41.503	34.0964
																					39.6986	42.6175	37.3269
																					38.115	40.8534	40.3468
																					38.804	44.4325	36.2194
																					37.3242	43.0813	38.1496
																					34.9524	41.6293	37.6503
																					36.4796	39.9249	37.5406
																					37.2218	40.3887	34.4295
																					36.3849	43.0813	35.6031
																					36.6223	39.8121	37.0003
																					38.4624	41.3824	39.1996
																					39.128	39.6548	35.9319
																					39.606	38.6943	34.4675
																					38.3911	38.8104	34.6659
																					36.1367	41.8868	38.3107
																					38.2672	41.836	36.3934
																					37.1301	39.2747	33.6262
																					38.2448	40.2492	36.1358
																					38.0103	39.0544	31.7236
																					38.2976	40.7707	32.7366
																					38.8735	40.8534	34.9548
																					39.233	40.1155	35.3316
																					39.0779	42.8077	34.5442
																					37.8185	39.579	32.2272
																					40.667	38.8973	31.5093
																					38.9806	38.436	33.5352
																					38.0139	41.2681	35.5305
																					38.969	39.0544	36.2747
																					38.5897	37.8885	34.4761
																					38.9661	35.4094	38.6809
																					36.0091	40.9761	40.5164
																					38.7427	37.7211	40.7765
																					38.9705	36.1902	38.4769
																					35.6807	35.255	40.5071
																					38.9643	39.7922	38.6466
																					37.7872	36.5249	37.3677
																					37.6771	39.0489	34.1908
																					36.846	40.5307	36.1213
																					39.3498	37.6601	34.9474
																					39.3211	39.5388	39.3418
																					38.3882	41.859	36.495
																					39.4297	37.978	36.1895
																					38.1232	38.0373	38.8362
																					36.5902	33.2146	32.5859
																					37.2198	39.1744	32.7891
																					35.2108	35.5063	34.7598
																					35.3266	37.3674	33.9858
																					35.775	32.0178	35.0989
																					38.842	38.4786	34.7143
																					37.0677	36.4949	35.8068
																					37.8087	37.6601	36.5747
																					38.9934	38.8134	41.0231
																					38.0239	36.6206	38.5181
																					38.6533	33.9451	37.9878
																					38.4562	35.391	35.5182
																					34.3469	37.7188	39.51
																					35.1645	37.6526	36.0539
																					39.2821	39.0244	38.0079
																					35.1081	36.7757	39.5022
																					39.4405	37.621	35.5156
																					35.7056	35.1619	38.5036
																					33.6057	40.0289	38.5058
																					37.0442	36.9841	41.5427
																					36.6384	37.9844	38.5371
																					36.8945	39.3189	35.534
																					35.5459	35.1527	37.5389
																					39.3248	35.4184	40.5758
																					36.641	35.4334	37.978
																					36.8205	37.6622	40.1608
																					38.0245	39.2729	39.5129
																					35.8996	35.241	39.0224
																					38.9623	33.8467	37.0099
																					42.0955	37.9221	39.9888
																					35.7017	34.9382	37.0292
																					35.8901	36.9032	36.9927
																					41.5702	38.1563	37.4607
																					37.6086	37.9096	33.55
																					33.1122	33.0067	34.758
																					35.1342	36.0916	36.35
																					38.4832	37.4767	38.3388
																					36.8452	35.157	36.2403
																					37.8099	38.0839	34.6036
																					39.3375	37.5547	36.1924
																					40.8492	36.1215	36.6005
																					37.0632	32.7839	35.6992
																					35.9112	35.5143	36.6544
																					36.9536	37.3417	38.0597
																					33.7272	38.28	35.1931
																					34.4165	34.4585	34.4799
																					37.5033	36.5194	35.8101
																					36.6854	32.2952	35.6502
																					33.992	31.6702	38.3143
																					38.3532	30.5541	35.1861
																					36.0369	34.2118	38.1521
																					37.7736	31.0339	36.3456
																					35.8032	34.2325	36.2387
																					37.8811	36.8745	37.1989
																					36.5273	33.7611	36.3555
																					34.0012	32.0459	36.1233
																					39.6859	35.3725	37.6588
																					35.2898	34.9319	34.5978
																					33.6185	32.0131	37.8408
																					35.6082	35.2169	38.4874
																					37.7818	33.7265	37.3356
																					39.4203	33.239	35.193
																					35.2778	35.1761	37.8117
																					36.3445	36.8918	38.9765
																					36.6999	31.3037	37.6686
																					36.1611	34.7287	37.5698
																					37.4142	37.3592	36.1601
																					34.2009	40.0295	37.5753
																					36.3265	36.8115	36.7207
																					32.9559	36.2097	38.2089
																					35.2809	36.6753	34.5578
																					37.0741	31.1903	37.3564
																					32.2637	32.2937	33.2483
																					37.4499	34.925	34.3628
																					35.7944	40.9412	36.3285
																					34.8991	41.7771	36.1339
																					32.6569	37.8358	34.3613
																					36.8011	37.6089	36.5036
																					34.0026	38.7267	37.4974
																					36.3102	37.6084	36.0622
																					33.9521	35.6734	34.99
																					37.2724	38.8391	32.5319
																					34.0394	36.391	32.2169
																					38.8384	30.2169	36.5647
																					33.9031	36.8841	37.0419
																					34.4367	39.0826	35.05
																					34.415	40.2628	35.0626
																					38.3615	34.2887	36.5184
																					33.7628	32.2856	32.322
																					37.5213	36.5416	35.0604
																					36.5773	38.3442	33.5631
																					39.5726	35.5292	38.0789
																					35.7243	36.4712	34.5122
																					36.2268	40.3275	33.8072
																					34.5367	39.0888	34.6685
																					34.913	35.1323	36.065
																					34.3962	36.4253	36.9054
																					36.3854	37.941	39.0201
																					39.4868	39.7429	37.0499
																					35.2947	35.801	37.9919
																					33.1771	37.3308	34.1377
																					35.2734	39.8483	34.0522
																					34.6388	33.5142	35.485
																					35.4396	38.0348	35.0507
																					36.0292	37.07	36.9901
																					38.0196	35.1141	35.52
																					35.943	36.6843	34.02
																					32.5478	36.3819	39.0228
																					36.2793	37.8279	37.0429
																					37.4148	35.0324	35.0159
																					37.9183	36.7697	35.5455
																					37.4674	33.1094	34.95
																					37.881	32.0832	34.03
																					36.6958	31.9184	32.0444
																					34.7334	34.6903	33
																					39.919	34.5538	32.501
																					34.3963	36.3017	36.5384
																					35.5154	29.3895	36.505
																					32.3427	34.6239	32.99
																					40.4645	30.2017	33.9787
																					37.2408	31.7533	37.01
																					36.8385	35.2452	34.0858
																					34.4909	34.53	34.2293
																					36.0912	32.3738	35.087
																					30.3349	37.3516	32.1251
																					35.984	31.491	39.2056
																					35.8125	36.7025	33.74
																					34.2601	37.3683	37.1131
																					37.8182	37.2917	38.8173
																					35.2032	34.064	36.2409
																					34.9472	35.2533	34.0683
																					36.0703	36.0678	34.0362
																					32.0702	36.6527	34.1477
																					36.0842	31.0769	37.6097
																					33.8198	35.4692	35.1366
																					34.5147	32.2466	32.505
																					39.4492	34.207	39.2741
																					33.2402	37.3431	35.0263
																					32.9305	34.1087	36.5171
																					37.6013	36.5273	36.6314
																					37.7585	32.9695	35.0659
																					33.7872	34.8137	34.8675
																					35.4396	36.0388	35.0475
																					32.8488	35.5571	36.0871
																					30.2312	32.6363	39.9854
																					32.9294	35.7846	40.3398
																					31.8857	38.4132	36.1107
																					32.6581	35.6196	34.1529
																					31.5242	32.2242	32.499
																					31.5116	36.1242	31.01
																					35.4183	34.5364	33.0455
																					37.5864	36.3922	32.1619
																					37.0653	36.3852	34.057
																					31.1107	37.3607	37.9942
																					33.3054	33.2229	37.1804
																					35.53	37.535	38.1474
																					34.2945	34.8125	38.1617
																					35.7292	37.821	35.0043
																					30.3321	34.9789	33.2274
																					35.769	35.6788	37.7138
																					28.4856	35.7735	38.6923
																					34.6385	39.1611	38.2243
																					37.3089	37.41	37.1306
																					41.1238	34.1394	31.0844
																					37.0216	35.4672	36.8438
																					36.5513	36.915	34.9982
																					34.4045	37.9603	42.572
																					32.89	36.0808	35.6252
																					38.221	35.45	36.135
																					33.4052	36.8554	39.5755
																					36.387	33.2691	38.1267
																					34.878	33.1117	36.8487
																					34.696	38.2943	37.1507
																					34.4051	36.9079	40.0509
																					38.6773	37.005	39.7007
																					38.1687	37.7708	39.6714
																					39.7642	34.6239	37.7092
																					37.522	38.3452	39.4368
																					35.9973	35.7729	39.2237
																					36.6854	37.8286	38.693
																					35.8042	34.7367	33.6865
																					37.5054	35.7276	38.9365
																					33.549	40.9839	38.2691
																					36.1848	39.9365	37.9726
																					35.1329	38.3117	37.8517
																					38.9021	36.7116	37.291
																					41.6068	34.2468	35.9227
																					37.7783	35.4386	38.4172
																					31.4662	37.0193	38.444
																					37.7034	38.1736	38.1366
																					34.7833	35.2924	39.6707
																					36.1775	32.6274	34.5204
																					34.4037	36.9474	36.4802
																					32.4137	33.6314	34.9544
																					34.8519	37.8511	35.2324
																					28.7475	34.7731	38.4044
																					33.7516	37.114	34.0982
																					35.7279	35.7323	35.1264
																					34.8138	30.5883	38.3882
																					32.8374	34.6307	35.0142
																					32.6351	30.6501	35.2202
																					38.773	35.9221	36.8378
																					33.9435	35.4349	37.133
																					35.6814	35.9979	36.1375
																					35.2891	33.7306	36.5098
																					32.4413	38.2702	35.337
																					36.9023	34.0638	36.6999
																					37.9438	33.2321	35.8256
																					32.7137	36.1427	37.2121
																					37.9017	32.5706	38.3539
																					36.1156	33.766	40.8797
																					33.5101	38.7259	36.3568
																					35.804	34.3168	38.6206
																					35.8022	34.6925	38.1614
																					33.7364	35.6912	36.3572
																					33.1549	32.7479	36.9079
																					35.9154	37.171	36
																					36.4799	34.7929	32.5964
																					33.5128	38.1674	36.5375
																					34.6394	34.245	37.5629
																					37.4431	34.5646	37.985
																					35.1219	34.812	36.5786
																					39.2671	33.0419	36.0085
																					39.7905	34.931	37.975
																					38.7456	39.7714	37.0231
																					38.9639	36.2329	39.0128
																					41.9116	37.0233	36.03
																					40.5536	38.8765	36.0378
																					41.1064	36.164	32.0643
																					40.5629	33.7173	35.0234
																					39.6253	35.7858	40.0675
																					43.2193	41.1189	37.0119
																					43.0757	34.7508	38.5215
																					36.7516	40.7072	36.539
																					36.7352	37.9578	37.0629
																					38.3081	37.2255	33.1234
																					38.0078	35.1552	35
																					36.4903	35.2006	36.52
																					35.2181	36.1583	38.0326
																					40.0364	32.9009	39.0026
																					37.6185	33.3291	40.04
																					34.9524	33.039	32.0472
																					38.4534	34.5664	36.1115
																					36.515	34.7518	36.1339
																					37.009	32.9846	33.1533
																					36.5047	36.6449	33.2361
																					36.0574	34.0698	33.0418
																					40.4632	36.2717	35.0218
																					41.401	33.7582	37.0726
																					38.4929	32.3854	35.4651
																					41.5696	37.2286	37.515
																					37.1058	33.7218	37.5382
																					38.6008	38.2898	36.2122
																					40.946	35.7094	37.5
																					36.134	33.2744	34.6651
																					36.0167	31.7904	40.5668
																					36.0082	35.2329	38.6728
																					43.8034	32.4417	38.505
																					39.4947	32.5776	38.0321
																					37.9521	35.7886	35.6078
																					39.6601	34.3385	36.5173
																					39.0127	33.1766	38.5987
																					40.6434	33.6054	38.0232
																					35.5365	32.7092	37.0138
																					33.5947	34.2125	37.206
																					33.0984	28.6381	34.1198
																					35.5514	38.6275	38.5113
																					34.1582	35.8885	37.5085
																					36.0147	34.1871	32.6098
																					35.086	33.9602	32.6423
																					32.0822	36.0818	39.6593
																					36.9912	34.9564	35.0671
																					38.5775	36.0084	38.0144
																					37.0207	33.531	35.1002
																					35.5162	35.7547	34.2975
																					34.0761	31.2498	37.0532
																					32.6223	34.5884	36.528
																					38.9668	35.9143	39.0031
																					37.0273	35.7866	34.514
																					38.481	36.4157	35.5086
																					39.8477	35.1081	36.1083
																					37.0652	36.0041	34.5876
																					34.2322	36.363	38.01
																					33.0542	33.1397	35.0288
																					34.959	35.9088	37.495
																					36.238	35.0644	38.0119
																					35.1744	41.3318	38.1306
																					34.7838	36.426	35.4951
																					37.2637	36.2835	35.3055
																					36.3606	38.483	39.4665
																					36.7785	36.9857	38.6868
																					35.165	36.65	39.6616
																					34.3107	32.1469	38.2377
																					34.4047	31.8405	35.4877
																					38.6585	34.9942	37.0573
																					34.1785	35.1774	33.0752
																					35.8954	38.366	38.4781
																					39.2327	36.3592	37.4731
																					33.6414	31.2214	41.98
																					36.3617	32.5446	37.993
																					36.383	34.3108	34.4831
																					35.4228	35.4683	35.515
																					38.9827	36.5583	38.5788
																					36.1987	32.4186	35.0571
																					36.4865	36.8985	37.6236
																					31.3945	33.7223	35.0391
																					33.7623	35.155	35.5038
																					33.5676	33.3793	39.4736
																					35.8891	30.193	35.0437
																					34.5005	32.1986	39.2135
																					37.7095	30.7057	39.5804
																					35.1863	36.7048	35.571
																					32.8145	35.5945	37.1143
																					35.7025	32.3132	36.086
																					34.2585	32.9124	39.5306
																					36.1059	35.2444	37.9834
																					33.7798	31.8934	35.1771
																					36.6689	33.8206	35.5744
																					36.7943	40.2952	41.6586
																					35.8964	38.6087	37.1554
																					32.8348	38.442	40.3572
																					34.0315	33.0527	37.2031
																					33.3776	38.9382	36.1281
																					32.6464	35.0873	39.2473
																					35.135	39.4421	39.9827
																					37.3072	36.0123	39.5216
																					34.4966	34.0322	37.1214
																					36.1782	32.1411	38.2288
																					37.2256	34.0265	40.1074
																					38.5768	37.3615	37.1115
																					39.1047	32.1307	36.9932
																					38.5069	38.2646	38.1243
																					37.524	36.5155	38.2021
																					35.8898	30.9775	41.1867
																					36.9691	36.3567	36.712
																					37.1643	35.3063	39.1833
																					38.1653	34.6978	37.1222
																					37.7862	32.934	31.4953
																					35.1812	31.327	40.6106
																					36.3648	33.3985	39.2351
																					35.4315	39.2243	37.6182
																					36.8385	36.5655	38.97
																					35.318	35.5173	39.9672
																					35.1863	32.2403	38.211
																					35.4089	34.6126	38.1653
																					35.8933	36.7672	34.1025
																					35.6435	35.7542	38.5711
																					35.7592	34.7486	41.041
																					34.7752	34.4877	39.1576
																					35.6647	34.2197	39.8803
																					38.2792	37.051	38.4016
																					39.5378	32.8798	36.5286
																					36.0504	38.1234	37.985
																					40.8401	32.4285	36.1539
																					35.4406	39.9968	35.2244
																					38.6848	37.1322	38.3409
																					39.4362	35.279	38.0269
																					37.3729	37.3393	34.7813
																					39.4131	38.0029	37.634
																					41.2446	39.5247	37.2238
																					34.9195	38.8951	42.4208
																					36.1974	36.2301	37.368
																					38.9397	35.701	36.3442
																					36.8011	35.1833	35.2477
																					36.5041	33.1358	33.5258
																					31.8509	37.5968	36.3095
																					32.4878	32.7736	35.017
																					36.3207	35.5123	39.5985
																					36.015	36.3546	35.8165
																					35.0741	35.3077	35.6358
																					36.1715	38.728	35.1946
																					35.5814	39.7001	36.2305
																					35.4294	33.2115	41.6707
																					32.0122	33.8363	33.2262
																					36.0027	33.5692	38.4735
																					34.5205	34.376	35.02
																					36.1712	38.9001	36.9841
																					37.7283	37.658	34
																					36.671	36.3836	38.0521
																					36.0148	37.7123	37.0227
																					35.4176	40.6448	35.0049
																					35.4516	40.2754	34.01
																					32.8137	42.2276	31.5192
																					37.249	38.5881	37.0736
																					39.3944	41.2728	35.0637
																					33.8683	41.853	38.0042
																					36.0372	39.3381	33.0001
																					34.7884	37.2271	40.01
																					36.9172	38.1505	37.495
																					36.3617	40.4192	37.97
																					38.326	38.2474	36.0056
																					34.1672	38.3747	35.0643
																					37.7317	40.6722	36.0753
																					33.8529	40.639	34.6213
																					34.3196	38.113	37.0093
																					34.2372	38.4032	34.9943
																					36.6966	42.9102	36.5991
																					41.5953	42.4333	33.0275
																					36.3774	40.301	30.5532
																					38.6265	40.5865	35.0396
																					33.7576	39.7301	37.0887
																					37.4351	42.1589	39.5182
																					40.7188	42.5884	39.48
																					38.9321	37.8248	37.5322
																					38.3314	38.8817	34.48
																					35.4369	38.9276	36.0125
																					32.8197	38.9362	34.0688
																					31.9788	38.6851	34.7458
																					38.6076	43.3201	38.0798
																					35.7928	38.3552	34.4937
																					34.9634	40.5365	41.0473
																					31.4376	40.6535	35.0228
																					36.3483	40.9371	35.02
																					37.3431	39.7351	34.9694
																					33.7031	38.4581	33.015
																					32.0973	40.151	36.0317
																					34.941	36.5097	38.5032
																					39.1054	40.0302	37.0243
																					33.8467	40.3448	34.5167
																					36.9645	39.8085	36.5245
																					37.3745	38.1237	36.4844
																					33.5752	41.2146	37.4635
																					37.0371	41.3196	37.016
																					30.6866	36.7513	35.4838
																					33.2679	35.7879	38.5467
																					36.3289	33.9947	40.6193
																					38.5271	41.1947	37.1366
																					35.3935	37.9712	35.008
																					35.2459	34.0232	39.5102
																					33.3916	37.7227	36.4836
																					32.6371	39.6018	35.5083
																					33.7545	38.069	35.5097
																					35.6056	37.0639	36.4936
																					35.4042	38.6071	38.4791
																					36.6531	39.449	38.5396
																					31.449	36.0514	33.4995
																					31.4113	40.056	34.0108
																					31.7356	36.211	34.0244
																					36.3289	40.2424	35.5563
																					38.0573	40.238	37.0031
																					34.1736	35.9919	36.053
																					34.7841	38.0881	36.1082
																					30.9683	35.6353	36.0242
																					31.8676	33.7877	35.0157
																					32.8191	40.2308	36.1024
																					35.2453	39.7105	41.344
																					35.2531	37.8659	35.7976
																					36.7893	35.5866	36.1611
																					33.5615	36.8127	37.3094
																					37.563	36.6604	37.4526
																					34.1843	34.5335	34.657
																					35.0951	36.1335	35.0885
																					36.6337	37.6934	34.7882
																					36.3706	36.8195	39.5912
																					35.7158	37.0801	35.31
																					38.5225	39.9657	36.6623
																					34.0141	39.533	41.7137
																					35.3094	40.6291	37.7346
																					35.4128	35.7748	37.9851
																					35.0814	38.9517	37.9672
																					34.2685	35.481	38.6124
																					34.5082	38.188	40.3134
																					35.7117	37.637	40.6403
																					35.8678	37.2236	38.5804
																					36.1761	40.5899	39.1903
																					34.6456	39.223	35.7917
																					37.3837	35.8751	37.6946
																					35.3873	34.7909	39.3065
																					35.4115	37.2981	37.9632
																					34.0407	36.2679	39.1174
																					35.8898	35.8977	39.1548
																					36.6251	40.152	41.1225
																					38.0224	36.4801	40.8081
																					33.8806	37.6725	35.4436
																					38.7858	40.307	38.5648
																					34.0033	39.8009	35.8793
																					38.2394	36.6115	35.3582
																					34.0487	37.6037	37.0178
																					38.9767	37.501	38.2535
																					38.7918	40.5783	37.1488
																					38.1825	36.1065	38.2408
																					38.4762	39.817	32.4986
																					36.9156	40.8386	38.4461
																					38.1753	40.5981	38.709
																					33.89	38.184	37.9006
																					36.6402	40.5634	39.1249
																					34.3481	41.3544	35.3483
																					34.9727	36.9635	35.6795
																					38.0364	37.0814	33.4758
																					36.381	41.7852	38.6286
																					33.0852	41.2286	38.736
																					33.3898	38.3062	37.9629
																					34.1759	42.1794	37.1378
																					34.0445	40.4379	37.6096
																					37.7102	40.1912	40.0195
																					36.8448	38.6129	39.4775
																					37.1113	37.3379	35.0632
																					36.983	39.4299	39.014
																					35.0897	39.9288	37.178
																					34.3646	39.6716	34.95
																					36.4943	37.8948	39.0876
																					34.9963	35.1537	39.6783
																					36.9387	39.071	35.0084
																					36.1833	40.2368	35.559
																					37.5999	35.7109	39.5063
																					36.6681	35.9904	38.0038
																					39.4413	39.452	39.02
																					38.9912	40.3917	41.0393
																					39.8666	39.5059	35.9751
																					42.0866	41.1511	39.9943
																					41.1479	38.1131	35.5338
																					41.4065	39.3043	37.5365
																					39.199	40.6781	38.1151
																					37.2813	36.5062	38.07
																					41.6087	40.3101	36.5233
																					36.8291	39.2882	38.0537
																					38.7527	37.8282	38.0321
																					36.7234	43.1692	36.0572
																					41.9471	35.9895	35.0243
																					40.4937	40.7706	37.9734
																					40.1141	39.2336	38.7057
																					39.2221	42.9725	37.02
																					40.5122	44.3466	39.0661
																					41.5945	45.3697	39.2403
																					37.8816	40.1016	38.0947
																					40.284	35.6496	40.06
																					40.9563	34.946	37.8876
																					42.3964	37.5748	35.5101
																					40.9619	35.4242	38.0295
																					40.1613	38.6967	35.9637
																					39.3841	42.6508	39.303
																					40.6742	43.6866	40.5591
																					41.4722	44.738	40.6544
																					40.3147	37.948	34.995
																					37.7746	40.6144	37.6354
																					37.2531	44.0996	35.6298
																					40.4963	39.2851	36.01
																					40.4769	43.3904	36.515
																					39.2382	37.7857	39.5386
																					38.9743	39.6838	34.1609
																					39.5279	42.2145	38.004
																					38.4035	43.5457	35.02
																					38.0866	44.1683	39.5787
																					40.757	47.8622	41.0172
																					40.7595	48.3233	37.5029
																					39.8714	42.4286	33.4989
																					40.2831	30.2963	40.6507
																					39.0056	34.7931	40.533
																					41.215	35.3214	33.597
																					40.0374	39.2631	40.7359
																					37.7835	39.1618	36.0849
																					40.6644	38.4722	40.2234
																					39.4803	31.8139	37.5939
																					39.9499	43.7698	35.5666
																					39.0277	40.9033	37.0352
																					37.2442	34.822	36.5139
																					38.3217	39.2096	39.5675
																					37.8035	31.9862	40.5431
																					37.9629	34.9954	39.103
																					39.9444	37.2207	39.4784
																					40.3856	30.1702	39.0428
																					37.5142	38.5652	41.0843
																					36.5816	40.7708	36.0683
																					37.0192	39.4828	38.2246
																					36.7365	40.605	38.3221
																					35.1636	42.1507	34.226
																					35.5331	42.3521	36.9938
																					30.7309	43.0528	35.0436
																					38.1377	43.143	36.639
																					32.1507	39.5384	36.1906
																					33.662	39.1471	36.1219
																					31.6692	40.6732	38.4044
																					34.5833	42.3455	35.3086
																					33.09	43.8331	36.7168
																					35.7056	39.6861	33.975
																					30.1845	40.3004	36.0578
																					31.6702	41.6574	31.7789
																					31.6355	40.0788	37.4225
																					33.1604	38.708	40.3318
																					34.1316	41.4574	40.7592
																					36.9972	40.6317	37.6166
																					36.6735	40.7468	40.1364
																					33.153	40.7675	36.0663
																					32.6761	37.8808	34.6969
																					33.8788	39.4297	36.7334
																					29.7457	37.8452	33.7072
																					31.157	38.4937	37.6602
																					31.8041	40.6529	35.5093
																					35.1	41.3159	36.1633
																					29.7236	37.6243	38.1546
																					34.0829	35.4316	36.7956
																					28.827	36.141	37.1438
																					29.2061	38.6282	36.2944
																					26.7799	36.2238	39.158
																					31.2235	36.9565	37.7252
																					28.0167	39.9057	38.9177
																					29.5866	40.1369	35.5362
																					34.82	41.7613	38.6705
																					35.792	42.8834	35.8624
																					33.5154	45.0423	39.3173
																					38.7813	41.3891	38.0598
																					34.9691	39.9432	34.6042
																					33.0566	44.4566	36.0018
																					33.6876	42.8107	35.5822
																					37.2475	41.2779	38.1835
																					34.4759	38.4343	37.3386
																					32.1559	34.685	36.9917
																					34.4859	39.0631	40.3058
																					34.4478	36.8611	40.5314
																					32.3549	38.4187	37.0335
																					30.6839	42.9087	40.0385
																					31.7746	48.1344	35.569
																					32.4894	43.5388	34.49
																					34.5113	42.2005	35.49
																					32.625	38.9061	36.0939
																					30.1131	47.3083	38.4674
																					38.8395	46.6306	37.034
																					35.0396	44.3621	36.2282
																					34.8587	44.5062	40.0235
																					34.6139	34.8248	35.5185
																					32.1603	39.9847	34
																					32.0017	39.2657	36.0466
																					35.179	36.5435	37.0457
																					38.219	43.7847	39.0096
																					33.6333	36.0455	36.1583
																					38.8914	35.0005	33.0491
																					41.0471	42.1755	37.6405
																					37.0292	36.0606	36.5751
																					34.3908	40.5478	41.5287
																					37.8621	39.4282	39.6253
																					34.8281	37.9551	38.0684
																					36.3002	38.3059	38.0631
																					34.2495	42.303	40.994
																					41.8487	38.6064	40.2989
																					41.0344	42.1374	38.4905
																					33.6203	39.4126	41.2136
																					35.6932	36.499	39.9293
																					37.6852	38.713	40.1522
																					38.0396	42.6883	35.016
																					33.5048	41.1443	38.4864
																					38.5173	41.7137	38.1159
																					36.1132	42.017	39.8072
																					36.6553	39.6682	39.3266
																					36.349	41.1067	42.0314
																					35.9403	43.7243	40.6985
																					32.9683	46.6205	36.2591
																					36.8663	38.0261	37.1633
																					34.9094	37.0182	38.1489
																					32.234	40.025	41.2005
																					35.7133	36.504	41.0417
																					38.9802	41.9863	36.9786
																					35.9129	45.307	38.5182
																					38.142	39.2553	37.0468
																					31.9113	39.4657	34.0964
																					33.9696	42.1791	37.3269
																					33.9664	40.0116	40.3468
																					36.1251	36.1648	36.2194
																					35.2687	40.7161	38.1496
																					34.84	25.7437	37.6503
																					32.7255	33.3112	37.5406
																					34.4822	24.0362	34.4295
																					39.0313	32.9779	35.6031
																					34.1694	29.7355	37.0003
																					37.7246	34.2	39.1996
																					36.5937	38.977	35.9319
																					35.7864	38.583	34.4675
																					36.6065	32.2863	34.6659
																					39.5693	26.6099	38.3107
																					33.4771	38.7138	36.3934
																					38.2991	38.9251	33.6262
																					32.6351	27.1391	36.1358
																					35.2689	35.3206	31.7236
																					34.9199	29.7004	32.7366
																					33.75	30.7741	34.9548
																					31.4508	32.1927	35.3316
																					34.0427	28.8512	34.5442
																					38.4751	36.2349	32.2272
																					33.0889	25.6548	31.5093
																					32.2268	30.43	33.5352
																					35.5162	28.9772	35.5305
																					35.1178	29.7641	36.2747
																					33.8914	35.1579	34.4761
																					35.3732	26.1045	38.6809
																					34.9001	33.0741	40.5164
																					39.231	29.2262	40.7765
																					36.8929	29.5547	38.4769
																					35.3705	35.3246	40.5071
																					40.2113	35.7097	38.6466
																					37.2455	32.5898	37.3677
																					34.7296	36.5366	34.1908
																					36.7714	32.1259	36.1213
																					38.8325	40.0783	34.9474
																					37.231	32.3347	39.3418
																					35.784	36.4843	36.495
																					33.7983	33.0121	36.1895
																					35.5338	27.9718	38.8362
																					34.5773	34.4659	32.5859
																					34.7449	28.827	32.7891
																					40.4772	36.553	34.7598
																					39.4338	29.4765	33.9858
																					36.1624	30.6598	35.0989
																					39.3022	30.6501	34.7143
																					39.5991	29.9668	35.8068
																					38.6803	26.3531	36.5747
																					28.2126	35.5799	41.0231
																					35.6717	31.6282	38.5181
																					33.1595	26.3801	37.9878
																					36.0968	31.2692	35.5182
																					35.5523	27.9683	39.51
																					36.0551	28.892	36.0539
																					38.6499	32.0161	38.0079
																					38.4943	33.592	39.5022
																					39.3664	33.5757	35.5156
																					34.0919	33.6163	38.5036
																					32.3895	33.6481	38.5058
																					33.4534	37.6146	41.5427
																					32.636	37.6806	38.5371
																					31.6193	35.2808	35.534
																					35.1825	36.0368	37.5389
																					31.2944	33.5407	40.5758
																					33.7172	28.8324	37.978
																					37.2131	27.2003	40.1608
																					31.2266	26.408	39.5129
																					34.0718	32.7736	39.0224
																					34.0733	30.3546	37.0099
																					35.2525	31.9523	39.9888
																					37.0352	31.9845	37.0292
																					34.5385	29.64	36.9927
																					37.5175	29.072	37.4607
																					37.5734	24.0023	33.55
																					33.2243	29.2289	34.758
																					32.4786	29.7824	36.35
																					37.0429	32.3216	38.3388
																					35.743	34.4714	36.2403
																					32.1111	32.6062	34.6036
																					33.5798	27.6703	36.1924
																					36.5362	37.4043	36.6005
																					32.1215	32.6055	35.6992
																					35.5277	35.0296	36.6544
																					37.0118	35.2672	38.0597
																					35.5429	27.5871	35.1931
																					36.9981	34.4545	34.4799
																					33.6425	39.3538	35.8101
																					40.8534	46.7282	35.6502
																					41.4379	33.2301	38.3143
																					39.3187	41.6025	35.1861
																					38.1178	40.0069	38.1521
																					36.7465	41.4508	36.3456
																					37.542	38.2847	36.2387
																					38.5746	39.1026	37.1989
																					37.3013	39.2681	36.3555
																					37.0675	42.5338	36.1233
																					36.2598	37.7074	37.6588
																					37.792	33.7714	34.5978
																					40.1169	38.6464	37.8408
																					39.053	40.8551	38.4874
																					37.3102	40.5118	37.3356
																					41.3078	35.5622	35.193
																					39.9204	40.6739	37.8117
																					37.5392	38.1282	38.9765
																					39.915	39.6745	37.6686
																					37.0769	41.1309	37.5698
																					37.6107	39.6783	36.1601
																					39.0391	40.5295	37.5753
																					37.5288	35.4339	36.7207
																					40.5728	38.1047	38.2089
																					36.6461	41.3316	34.5578
																					41.5441	39.9778	37.3564
																					42.2908	39.5785	33.2483
																					42.9934	38.3469	34.3628
																					42.9621	35.2139	36.3285
																					38.2843	38.9525	36.1339
																					40.7407	46.2624	34.3613
																					40.7448	40.3086	36.5036
																					40.8258	41.886	37.4974
																					37.616	41.2545	36.0622
																					37.3316	38.4212	34.99
																					36.1201	39.1414	32.5319
																					40.5008	39.0928	32.2169
																					37.7937	41.6126	36.5647
																					36.5437	35.6026	37.0419
																					37.0511	33.8009	35.05
																					42.2604	36.9628	35.0626
																					41.4211	45.3927	36.5184
																					41.3282	41.8868	32.322
																					40.2404	37.1248	35.0604
																					38.5743	36.4589	33.5631
																					40.1493	41.5933	38.0789
																					38.9449	41.1734	34.5122
																					41.3105	40.6971	33.8072
																					35.641	42.2995	34.6685
																					37.8823	37.4233	36.065
																					38.9607	39.9249	36.9054
																					39.5202	38.461	39.0201
																					38.0261	39.195	37.0499
																					37.5642	40.0031	37.9919
																					40.8439	39.7398	34.1377
																					37.3323	37.6198	34.0522
																					35.7777	38.448	35.485
																					39.3619	43.1654	35.0507
																					40.3772	39.579	36.9901
																					37.3241	41.6923	35.52
																					37.7048	41.14	34.02
																					37.1749	40.3887	39.0228
																					38.8383	39.3573	37.0429
																					38.2403	40.7707	35.0159
																					39.5308	40.7983	35.5455
																					42.303	39.7398	34.95
																					39.7177	39.6894	34.03
																					38.7519	40.0281	32.0444
																					39.5381	40.1155	33
																					38.4818	40.7707	32.501
																					36.7486	38.5389	36.5384
																					37.1349	42.8077	36.505
																					38.4669	43.909	32.99
																					38.1677	45.533	33.9787
																					36.9033	42.9796	37.01
																					34.1738	38.9679	34.0858
																					36.6124	42.267	34.2293
																					39.7694	42.3468	35.087
																					43.3893	37.353	32.1251
																					33.2521	35.5563	39.2056
																					35.9969	36.225	33.74
																					36.8036	33.6155	37.1131
																					34.7928	38.0132	38.8173
																					35.6902	37.3664	36.2409
																					36.6513	35.7946	34.0683
																					35.2734	34.2126	34.0362
																					38.6466	36.4726	34.1477
																					37.585	37.1214	37.6097
																					38.0132	36.7151	35.1366
																					39.1022	38.7621	32.505
																					37.4417	37.5899	39.2741
																					40.8322	37.4233	35.0263
																					40.6484	37.5766	36.5171
																					42.8342	36.4589	36.6314
																					38.1701	38.9166	35.0659
																					40.194	38.1215	34.8675
																					36.2053	37.5666	35.0475
																					36.9464	38.2786	36.0871
																					34.0338	38.4838	39.9854
																					37.2348	39	40.3398
																					36.6402	38.2426	36.1107
																					36.0148	38.2786	34.1529
																					39.1112	41.1491	32.499
																					36.9833	38.3471	31.01
																					35.5472	40.6971	33.0455
																					41.5566	38.9391	32.1619
																					37.2465	40.5771	34.057
																					38.1674	39.2747	37.9942
																					35.7066	40.5771	37.1804
																					36.7878	39.3954	38.1474
																					33.6921	39.6011	38.1617
																					36.3757	39.195	35.0043
																					37.1076	40.4784	33.2274
																					40.4977	36.4726	37.7138
																					40.9763	39.6011	38.6923
																					39.2709	38.0296	38.2243
																					36.0501	38.0132	37.1306
																					35.0479	39.3538	31.0844
																					33.2921	46.7282	36.8438
																					33.5293	33.2301	34.9982
																					41.4033	41.6025	42.572
																					35.8764	40.0069	35.6252
																					36.7777	41.4508	36.135
																					36.5984	38.2847	39.5755
																					34.231	39.1026	38.1267
																					39.1047	39.2681	36.8487
																					40.5171	42.5338	37.1507
																					39.7217	37.7074	40.0509
																					35.544	33.7714	39.7007
																					36.3643	38.6464	39.6714
																					37.5396	40.8551	37.7092
																					44.0454	40.5118	39.4368
																					38.0257	35.5622	39.2237
																					38.1138	40.6739	38.693
																					40.6416	38.1282	33.6865
																					42.8019	39.6745	38.9365
																					39.7535	41.1309	38.2691
																					35.1049	39.6783	37.9726
																					38.2388	40.5295	37.8517
																					39.0959	35.4339	37.291
																					39.3977	38.1047	35.9227
																					36.3513	41.3316	38.4172
																					36.1366	39.9778	38.444
																					38.9707	39.5785	38.1366
																					39.1994	38.3469	39.6707
																					35.1178	35.2139	34.5204
																					37.8588	38.9525	36.4802
																					40.3751	46.2624	34.9544
																					39.9188	40.3086	35.2324
																					39.5679	41.886	38.4044
																					39.716	41.2545	34.0982
																					34.8595	38.4212	35.1264
																					35.9031	39.1414	38.3882
																					38.2386	39.0928	35.0142
																					37.825	41.6126	35.2202
																					39.4361	35.6026	36.8378
																					38.2477	33.8009	37.133
																					40.1382	36.9628	36.1375
																					35.1178	45.3927	36.5098
																					39.4294	41.8868	35.337
																					41.3087	37.1248	36.6999
																					40.3857	36.4589	35.8256
																					42.4696	41.5933	37.2121
																					39.4361	41.1734	38.3539
																					34.8595	40.6971	40.8797
																					35.4395	42.2995	36.3568
																					37.7729	37.4233	38.6206
																					35.5487	39.9249	38.1614
																					39.8982	38.461	36.3572
																					36.113	39.195	36.9079
																					40.1634	40.0031	36
																					37.7792	39.7398	32.5964
																					38.3227	37.6198	36.5375
																					35.7083	38.448	37.5629
																					38.5178	43.1654	37.985
																					38.7972	39.579	36.5786
																					39.1233	41.6923	36.0085
																					39.1442	41.14	37.975
																					39.6567	40.3887	37.0231
																					34.4832	39.3573	39.0128
																					38.2366	40.7707	36.03
																					38.5884	40.7983	36.0378
																					40.5939	39.7398	32.0643
																					38.8293	39.6894	35.0234
																					42.1389	40.0281	40.0675
																					37.642	40.1155	37.0119
																					34.9717	40.7707	38.5215
																					36.8444	38.5389	36.539
																					38.9787	42.8077	37.0629
																					36.6956	43.909	33.1234
																					37.7795	45.533	35
																					34.8716	42.9796	36.52
																					35.4276	38.9679	38.0326
																					37.2927	42.267	39.0026
																					35.3915	42.3468	40.04
																					38.0162	37.353	32.0472
																					35.2049	35.5563	36.1115
																					38.5837	36.225	36.1339
																					35.8791	33.6155	33.1533
																					37.8376	38.0132	33.2361
																					34.7877	37.3664	33.0418
																					36.113	35.7946	35.0218
																					40.8471	34.2126	37.0726
																					35.1529	36.4726	35.4651
																					37.7858	37.1214	37.515
																					37.9877	36.7151	37.5382
																					40.3907	38.7621	36.2122
																					35.2586	37.5899	37.5
																					40.5975	37.4233	34.6651
																					35.8939	37.5766	40.5668
																					39.3855	36.4589	38.6728
																					39.2608	38.9166	38.505
																					38.7284	38.1215	38.0321
																					37.7716	37.5666	35.6078
																					36.233	38.2786	36.5173
																					40.1903	38.4838	38.5987
																					40.1736	39	38.0232
																					35.8587	38.2426	37.0138
																					38.4982	38.2786	37.206
																					37.4459	41.1491	34.1198
																					38.5849	38.3471	38.5113
																					40.3513	40.6971	37.5085
																					36.1725	38.9391	32.6098
																					35.8759	40.5771	32.6423
																					39.1683	39.2747	39.6593
																					35.5528	40.5771	35.0671
																					39.5426	39.3954	38.0144
																					39.4265	39.6011	35.1002
																					34.587	39.195	34.2975
																					35.8674	40.4784	37.0532
																					34.7737	36.4726	36.528
																					37.0555	39.6011	39.0031
																					38.2363	38.0296	34.514
																					36.6207	38.0132	35.5086
																					35.8876	32.8803	36.1083
																					39.1473	40.2616	34.5876
																					40.0526	35.6548	38.01
																					38.9522	36.6206	35.0288
																					37.1715	32.1227	37.495
																					36.0989	35.3989	38.0119
																					38.3088	36.2463	38.1306
																					33.7053	37.0871	35.4951
																					36.5652	36.3815	35.3055
																					38.2477	32.0084	39.4665
																					38.2395	34.4531	38.6868
																					36.6438	35.7001	39.6616
																					35.7746	34.1619	38.2377
																					38.2428	37.4668	35.4877
																					33.8729	37.3628	37.0573
																					33.4175	35.6472	33.0752
																					35.063	31.7917	38.4781
																					36.1248	34.5617	37.4731
																					35.2298	35.4068	41.98
																					34.4712	34.2182	37.993
																					40.6302	31.8229	34.4831
																					37.7895	37.091	35.515
																					36.4963	38.5617	38.5788
																					39.7246	38.8755	35.0571
																					35.1909	36.3038	37.6236
																					37.6129	40.6102	35.0391
																					38.5097	36.4999	35.5038
																					35.41	40.9771	39.4736
																					34.9578	36.351	35.0437
																					35.2864	39.3407	39.2135
																					34.0329	34.5207	39.5804
																					38.5109	41.2835	35.571
																					36.3669	35.985	37.1143
																					33.4927	40.598	36.086
																					41.247	36.1884	39.5306
																					37.532	34.4267	37.9834
																					40.0508	39.2228	35.1771
																					38.6511	35.4424	35.5744
																					38.5084	39.9929	41.6586
																					39.7127	37.8578	37.1554
																					40.03	35.4308	40.3572
																					38.1785	36.8301	37.2031
																					35.0893	36.6584	36.1281
																					38.5109	36.8373	39.2473
																					39.7031	37.9842	39.9827
																					37.7882	32.5675	39.5216
																					38.487	36.767	37.1214
																					37.8717	34.9142	38.2288
																					35.9078	36.2679	40.1074
																					36.6018	38.2016	37.1115
																					38.9967	34.435	36.9932
																					33.7757	33.2555	38.1243
																					37.3081	37.3728	38.2021
																					40.6434	38.8456	41.1867
																					38.3761	35.3837	36.712
																					34.1075	35.4019	39.1833
																					36.126	34.6071	37.1222
																					35.8774	33.3673	31.4953
																					36.2306	37.7206	40.6106
																					36.6436	35.9952	39.2351
																					40.355	33.6683	37.6182
																					35.8848	37.9134	38.97
																					36.9455	33.5526	39.9672
																					36.3652	35.915	38.211
																					37.3256	36.4074	38.1653
																					35.5439	32.2625	34.1025
																					34.4809	41.1105	38.5711
																					36.6325	33.728	41.041
																					33.5131	37.3638	39.1576
																					35.2456	35.6462	39.8803
																					36.3677	37.8295	38.4016
																					36.5093	39.3344	36.5286
																					36.5147	39.8121	37.985
																					36.5677	35.5058	36.1539
																					38.5019	34.1799	35.2244
																					34.0126	35.6931	38.3409
																					36.2404	37.3471	38.0269
																					37.8767	36.6628	34.7813
																					39.4393	34.4401	37.634
																					34.9157	37.8516	37.2238
																					34.4221	35.2638	42.4208
																					34.449	39.6357	37.368
																					36.1697	37.3729	36.3442
																					35.2487	32.2345	35.2477
																					35.9304	36.5483	33.5258
																					33.9846	34.8451	36.3095
																					36.0981	39.8121	35.017
																					34.9155	37.9143	39.5985
																					39.1516	39.8502	35.8165
																					37.0601	39.5711	35.6358
																					36.4284	37.4499	35.1946
																					39.2364	37.3471	36.2305
																					38.6942	36.0594	41.6707
																					33.5553	31.8454	33.2262
																					35.4308	37.7093	38.4735
																					38.5025	31.6071	35.02
																					36.1754	37.0959	36.9841
																					36.5534	37.2006	34
																					37.2421	33.2482	38.0521
																					39.1295	32.9029	37.0227
																					34.9827	36.7616	35.0049
																					36.8042	35.4203	34.01
																					35.0679	37.7231	31.5192
																					38.1071	38.643	37.0736
																					38.1593	34.7693	35.0637
																					35.7249	38.5715	38.0042
																					34.603	35.7446	33.0001
																					40.4977	32.9004	40.01
																					34.8444	32.243	37.495
																					35.5489	37.9537	37.97
																					35.5057	39.568	36.0056
																					38.5537	36.7581	35.0643
																					37.2788	29.1863	36.0753
																					39.4349	33.6408	34.6213
																					38.5283	26.2675	37.0093
																					37.9652	33.8186	34.9943
																					35.2769	35.7262	36.5991
																					34.6316	29.7005	33.0275
																					36.9642	37.6548	30.5532
																					36.3292	35.7349	35.0396
																					31.4025	30.4093	37.0887
																					34.2095	38.6414	39.5182
																					33.7632	33.816	39.48
																					36.8453	35.091	37.5322
																					37.0542	34.7661	34.48
																					33.8853	35.1047	36.0125
																					35.33	34.793	34.0688
																					32.8315	33.1122	34.7458
																					35.4656	32.5133	38.0798
																					33.8231	36.7147	34.4937
																					31.8627	31.8248	41.0473
																					33.1121	34.1877	35.0228
																					34.907	31.5204	35.02
																					33.9317	30.377	34.9694
																					31.894	31.5943	33.015
																					35.3815	36.4212	36.0317
																					32.9072	31.3295	38.5032
																					32.9685	37.3928	37.0243
																					26.9321	35.4259	34.5167
																					32.7658	32.4708	36.5245
																					32.4258	34.2096	36.4844
																					34.1859	33.4978	37.4635
																					35.2455	34.3343	37.016
																					37.799	31.5168	35.4838
																					32.3062	30.4385	38.5467
																					29.4601	33.0115	40.6193
																					36.8965	31.5236	37.1366
																					29.8532	36.295	35.008
																					34.5	36.5095	39.5102
																					35.3713	32.7345	36.4836
																					35.3497	34.4973	35.5083
																					34.4949	33.9944	35.5097
																					33.533	33.4664	36.4936
																					29.8775	31.5531	38.4791
																					34.1611	37.2509	38.5396
																					28.2004	35.2109	33.4995
																					30.7403	31.549	34.0108
																					29.4624	34.5956	34.0244
																					33.8689	34.1972	35.5563
																					31.4194	32.2766	37.0031
																					32.4688	30.3799	36.053
																					29.2739	33.055	36.1082
																					35.439	34.3363	36.0242
																					35.2026	31.3192	35.0157
																					32.0052	35.1313	36.1024
																					35.0845	32.5849	41.344
																					34.9213	36.3582	35.7976
																					34.8243	35.7219	36.1611
																					36.0529	36.998	37.3094
																					34.3696	35.3568	37.4526
																					31.2985	35.2837	34.657
																					32.4836	36.641	35.0885
																					35.6481	34.2459	34.7882
																					30.2218	34.9208	39.5912
																					31.6536	37.4942	35.31
																					31.7232	29.5342	36.6623
																					29.4247	36.9678	41.7137
																					32.6551	38.2623	37.7346
																					30.8267	38.9868	37.9851
																					31.887	33.621	37.9672
																					28.4539	34.7834	38.6124
																					30.2914	34.962	40.3134
																					34.5098	34.8175	40.6403
																					30.5253	35.1902	38.5804
																					36.6329	33.0219	39.1903
																					37.8743	31.8142	35.7917
																					35.6858	31.4161	37.6946
																					38.5635	29.8179	39.3065
																					38.4045	31.9092	37.9632
																					37.433	34.6671	39.1174
																					36.5799	35.4175	39.1548
																					35.2693	35.6804	41.1225
																					40.0552	38.4622	40.8081
																					33.7161	33.7175	35.4436
																					32.9169	33.708	38.5648
																					34.829	34.5051	35.8793
																					36.377	33.4503	35.3582
																					34.6351	34.4622	37.0178
																					34.8665	32.5037	38.2535
																					33.4851	33.03	37.1488
																					31.7777	33.0693	38.2408
																					35.0509	29.3386	32.4986
																					34.0193	33.2506	38.4461
																					34.8185	32.8279	38.709
																					33.973	30.1022	37.9006
																					32.783	37.5488	39.1249
																					33.5894	30.7112	35.3483
																					36.2295	32.3726	35.6795
																					37.6657	36.5204	33.4758
																					34.6206	31.134	38.6286
																					37.9595	32.7911	38.736
																					36.6438	30.3234	37.9629
																					35.0726	31.4829	37.1378
																					33.0779	38.3496	37.6096
																					36.9904	32.9596	40.0195
																					36.3956	37.0783	39.4775
																					35.7112	34.4546	35.0632
																					36.3487	36.1848	39.014
																					38.9857	32.7958	37.178
																					37.6646	34.2154	34.95
																					31.7898	37.728	39.0876
																					35.6889	33.3417	39.6783
																					38.7869	34.1682	35.0084
																					34.4094	36.5768	35.559
																					33.9806	33.6456	39.5063
																					36.3553	33.2135	38.0038
																					32.0737	34.6051	39.02
																					35.4061	35.9873	41.0393
																					33.4922	34.9242	35.9751
																					37.0373	36.5842	39.9943
																					37.924	37.9974	35.5338
																					36.7107	34.4612	37.5365
																					37.023	35.6236	38.1151
																					33.5249	33.5451	38.07
																					39.2394	38.9737	36.5233
																					37.8863	37.1907	38.0537
																					32.0098	35.3608	38.0321
																					35.3294	33.7067	36.0572
																					36.7974	38.7525	35.0243
																					32.7472	35.8026	37.9734
																					39.2357	39.0536	38.7057
																					35.0762	37.1476	37.02
																					36.4999	29.407	39.0661
																					35.7967	31.5666	39.2403
																					34.5809	32.634	38.0947
																					35.3059	35.2876	40.06
																					36.6656	35.9117	37.8876
																					34.4808	37.3444	35.5101
																					35.5098	39.5669	38.0295
																					33.7756	35.1219	35.9637
																					35.5506	33.8885	39.303
																					35.3641	33.6261	40.5591
																					38.9599	39.0377	40.6544
																					39.4025	34.7865	34.995
																					39.2322	34.1807	37.6354
																					36.8819	29.8567	35.6298
																					34.9946	34.0879	36.01
																					37.5312	35.1636	36.515
																					35.2986	32.3655	39.5386
																					33.433	29.6561	34.1609
																					36.479	37.2036	38.004
																					39.1952	35.4131	35.02
																					37.1851	34.9521	39.5787
																					37.2446	35.0355	41.0172
																					34.1481	35.6657	37.5029
																					36.2335	33.3946	33.4989
																					34.6817	31.1486	40.6507
																					34.6842	34.1904	40.533
																					36.1324	32.4101	33.597
																					32.102	33.9849	40.7359
																					37.2035	34.0597	36.0849
																					36.0568	34.1974	40.2234
																					36.0611	31.2828	37.5939
																					37.9893	33.7988	35.5666
																					40.1377	31.3758	37.0352
																					35.2562	32.8879	36.5139
																					35.056	36.152	39.5675
																					37.6486	35.4562	40.5431
																					36.9312	38.8919	39.103
																					38.139	35.0937	39.4784
																					34.3335	36.4861	39.0428
																					36.2055	37.1941	41.0843
																					40.3957	34.4793	36.0683
																					40.875	31.3066	38.2246
																					38.4436	35.4065	38.3221
																					38.9568	32.2393	34.226
																					37.4689	31.33	36.9938
																					40.8862	33.699	35.0436
																					41.8261	35.7581	36.639
																					39.4207	32.7029	36.1906
																					39.4358	33.3641	36.1219
																					40.4259	33.3709	38.4044
																					39.9835	33.2426	35.3086
																					38.9432	33.801	36.7168
																					37.9992	34.7719	33.975
																					41.9253	34.7137	36.0578
																					36.6158	30.3427	31.7789
																					36.5884	30.6376	37.4225
																					35.5447	32.7116	40.3318
																					39.8988	31.3163	40.7592
																					38.0169	31.9359	37.6166
																					39.8627	28.9429	40.1364
																					36.9341	32.9584	36.0663
																					39.0593	33.2767	34.6969
																					39.8443	31.3147	36.7334
																					37.5729	31.51	33.7072
																					36.6438	31.3357	37.6602
																					36.4743	38.6187	35.5093
																					36.9833	33.3837	36.1633
																					36.3669	35.1212	38.1546
																					35.4275	34.3406	36.7956
																					36.8654	32.5715	37.1438
																					33.0802	33.8882	36.2944
																					34.6167	35.0355	39.158
																					39.4549	35.4141	37.7252
																					38.7708	35.1062	38.9177
																					38.6592	35.9192	35.5362
																					39.0791	38.1989	38.6705
																					40.6395	38.5941	35.8624
																					37.8403	39.5354	39.3173
																					39.563	34.3501	38.0598
																					36.1719	37.208	34.6042
																					36.4651	33.2674	36.0018
																					36.8321	35.6113	35.5822
																					40.3212	34.0047	38.1835
																					40.3721	34.9109	37.3386
																					37.2207	34.4355	36.9917
																					35.558	33.5787	40.3058
																					39.23	34.3612	40.5314
																					36.9798	36.2358	37.0335
																					36.5014	41.5077	40.0385
																					37.7729	36.7074	35.569
																					36.7919	32.546	34.49
																					36.7756	36.0425	35.49
																					37.2615	35.9357	36.0939
																					37.2498	33.513	38.4674
																					37.3004	29.5535	37.034
																					35.4383	36.4884	36.2282
																					34.9973	32.9015	40.0235
																					40.3267	35.1733	35.5185
																					37.583	33.7377	34
																					38.7801	34.5384	36.0466
																					38.9687	31.6102	37.0457
																					37.2327	34.1151	39.0096
																					36.3303	34.4914	36.1583
																					36.6531	30.6713	33.0491
																					36.641	34.2485	37.6405
																					37.3261	36.0105	36.5751
																					33.896	33.685	41.5287
																					35.9963	32.1647	39.6253
																					34.4851	34.8108	38.0684
																					34.9806	35.3267	38.0631
																					36.1142	36.1318	40.994
																					34.3379	36.1433	40.2989
																					36.7889	32.0282	38.4905
																					35.6553	33.1981	41.2136
																					35.4278	34.1605	39.9293
																					35.0895	33.9438	40.1522
																					36.0124	33.2596	35.016
																					39.5554	35.1167	38.4864
																					39.5951	30.5461	38.1159
																					36.0161	32.9263	39.8072
																					37.1738	33.8982	39.3266
																					34.1738	32.3092	42.0314
																					33.8529	35.8942	40.6985
																					36.474	31.2746	36.2591
																					35.8617	36.7165	37.1633
																					38.0067	37.4801	38.1489
																					39.2017	33.8895	41.2005
																					35.0795	34.8773	41.0417
																					34.1694	36.9732	36.9786
																					38.6756	33.7574	38.5182
																					32.6625	33.0164	37.0468
																					38.5116	33.9402	34.0964
																					34.9137	33.8792	37.3269
																					34.7776	32.8374	40.3468
																					37.1621	34.2097	36.2194
																					30.9489	34.1265	38.1496
																					34.5189	34.0043	37.6503
																					36.9064	34.3929	37.5406
																					35.537	33.8837	34.4295
																					37.3379	36.8869	35.6031
																					36.3366	35.0887	37.0003
																					36.7923	33.3538	39.1996
																					40.3332	34.3492	35.9319
																					36.3275	34.7039	34.4675
																					40.7403	32.2621	34.6659
																					41.4177	33.6237	38.3107
																					40.149	32.7425	36.3934
																					38.1688	37.6454	33.6262
																					39.3972	31.1378	36.1358
																					39.4438	34.0549	31.7236
																					39.7677	35.4433	32.7366
																					36.4759	30.8036	34.9548
																					40.0568	37.2261	35.3316
																					39.9396	34.5344	34.5442
																					38.7943	32.5305	32.2272
																					39.1533	34.0931	31.5093
																					40.6854	33.1444	33.5352
																					36.6908	35.2383	35.5305
																					40.6581	34.6275	36.2747
																					42.0417	36.256	34.4761
																					36.3429	35.5255	38.6809
																					35.5965	38.2579	40.5164
																					37.0486	36.2105	40.7765
																					39.7406	37.3734	38.4769
																					39.402	38.1306	40.5071
																					39.161	37.1098	38.6466
																					40.6623	37.6234	37.3677
																					38.7829	34.6761	34.1908
																					36.7853	40.0812	36.1213
																					38.3998	37.9785	34.9474
																					36.6267	34.5172	39.3418
																					37.4006	36.2051	36.495
																					36.6402	41.2845	36.1895
																					38.1954	37.3016	38.8362
																					34.1818	34.8271	32.5859
																					38.8511	36.0884	32.7891
																					36.0229	36.7915	34.7598
																					36.3447	35.3603	33.9858
																					35.8649	30.2708	35.0989
																					33.1092	37.717	34.7143
																					33.1764	38.2058	35.8068
																					36.5085	38.3864	36.5747
																					32.9781	34.7825	41.0231
																					37.2425	35.1084	38.5181
																					39.9776	31.5136	37.9878
																					34.7958	32.9679	35.5182
																					36.0573	35.7451	39.51
																					41.4892	33.5093	36.0539
																					38.2147	31.5389	38.0079
																					36.8317	31.1621	39.5022
																					38.0361	36.4071	35.5156
																					38.5259	32.8877	38.5036
																					40.0183	34.8554	38.5058
																					36.6388	33.5349	41.5427
																					36.0182	32.9694	38.5371
																					36.0337	34.1629	35.534
																					36.645	34.3162	37.5389
																					35.0984	34.1234	40.5758
																					39.7516	31.6143	37.978
																					36.6402	33.8095	40.1608
																					41.0265	32.5527	39.5129
																					39.7021	37.364	39.0224
																					38.0358	35.3188	37.0099
																					35.4153	32.5799	39.9888
																					37.8614	37.3149	37.0292
																					36.9341	37.8368	36.9927
																					37.5354	35.1318	37.4607
																					40.0307	34.7976	33.55
																					39.6848	36.6018	34.758
																					40.3226	33.7178	36.35
																					41.2938	41.4281	38.3388
																					34.2517	34.0326	36.2403
																					41.246	35.5342	34.6036
																					38.1604	36.2316	36.1924
																					41.2343	34.3206	36.6005
																					36.1249	34.5571	35.6992
																					33.2554	35.791	36.6544
																					38.018	37.6914	38.0597
																					36.9341	38.0714	35.1931
																					39.3828	37.9861	34.4799
																					41.1055	40.6989	35.8101
																					39.3217	34.4496	35.6502
																					40.7583	34.0178	38.3143
																					41.92	36.9816	35.1861
																					33.5454	37.48	38.1521
																					40.492	35.3887	36.3456
																					40.7716	36.2678	36.2387
																					37.8369	38.4859	37.1989
																					36.9664	37.5128	36.3555
																					40.6742	33.762	36.1233
																					37.9611	37.7814	37.6588
																					37.3181	36.6449	34.5978
																					38.3091	35.1804	37.8408
																					36.0182	37.818	38.4874
																					37.5274	37.869	37.3356
																					36.6764	36.1683	35.193
																					42.6168	35.7461	37.8117
																					40.9958	35.1388	38.9765
																					38.4978	37.858	37.6686
																					39.7081	35.5054	37.5698
																					41.2325	36.2	36.1601
																					36.1922	34.1781	37.5753
																					37.6927	39.8288	36.7207
																					39.7823	37.4754	38.2089
																					40.4922	37.3492	34.5578
																					37.5981	35.1865	37.3564
																					38.7576	34.3715	33.2483
																					42.196	35.7385	34.3628
																					42.0292	34.9633	36.3285
																					37.728	36.2684	36.1339
																					36.9403	35.6043	34.3613
																					37.6022	36.3291	36.5036
																					40.1714	36.936	37.4974
																					37.427	31.7149	36.0622
																					39.6441	35.378	34.99
																					39.2783	38.3372	32.5319
																					35.4211	36.1608	32.2169
																					36.3457	34.03	36.5647
																					33.2022	34.9291	37.0419
																					34.0535	34.1977	35.05
																					37.7719	37.7788	35.0626
																					37.2561	31.8795	36.5184
																					33.6474	36.4098	32.322
																					36.8478	34.9582	35.0604
																					38.2166	34.5566	33.5631
																					35.787	38.2476	38.0789
																					39.2254	38.3369	34.5122
																					39.1596	33.0383	33.8072
																					36.3623	36.5267	34.6685
																					38.1687	32.3503	36.065
																					36.2429	34.8564	36.9054
																					39.7697	35.0056	39.0201
																					38.3073	32.3917	37.0499
																					37.4097	36.647	37.9919
																					38.1402	39.2794	34.1377
																					37.278	36.4063	34.0522
																					37.2505	35.0295	35.485
																					39.6617	39.4604	35.0507
																					38.9694	38.5824	36.9901
																					38.6866	34.5442	35.52
																					41.2295	32.0495	34.02
																					36.6438	35.1958	39.0228
																					40.642	34.4359	37.0429
																					31.756	36.8414	35.0159
																					34.8415	38.4968	35.5455
																					36.5611	40.5183	34.95
																					38.0686	35.3327	34.03
																					34.4048	38.1649	32.0444
																					37.501	33.9254	33
																					29.2646	32.0509	32.501
																					35.0448	33.7854	36.5384
																					34.5486	35.1048	36.505
																					31.1719	36.4173	32.99
																					32.6326	39.2983	33.9787
																					36.0712	38.7069	37.01
																					27.7329	37.3786	34.0858
																					33.2302	39.6866	34.2293
																					34.5535	43.1508	35.087
																					31.1734	38.8613	32.1251
																					32.6131	43.1922	39.2056
																					30.6602	39.2709	33.74
																					27.8598	39.7469	37.1131
																					28.2181	43.7144	38.8173
																					32.6309	46.6211	36.2409
																					30.6955	45.9207	34.0683
																					29.9962	33.8302	34.0362
																					35.0754	38.2844	34.1477
																					33.1083	40.7624	37.6097
																					34.5876	38.9498	35.1366
																					31.6542	40.0638	32.505
																					33.567	37.4995	39.2741
																					31.7963	41.9667	35.0263
																					34.0984	40.3377	36.5171
																					34.678	41.8161	36.6314
																					36.6608	38.2545	35.0659
																					31.5261	37.0425	34.8675
																					33.7909	38.2691	35.0475
																					30.7953	34.2555	36.0871
																					38.8169	41.7062	39.9854
																					36.4968	44.1591	40.3398
																					35.608	44.286	36.1107
																					34.4121	41.8992	34.1529
																					32.0903	43.8893	32.499
																					35.9032	39.8473	31.01
																					34.4073	34.846	33.0455
																					34.2193	31.6511	32.1619
																					32.1746	40.2077	34.057
																					34.2956	43.1519	37.9942
																					33.8478	38.6343	37.1804
																					35.0514	34.5962	38.1474
																					36.0985	38.5225	38.1617
																					37.2208	33.8444	35.0043
																					36.4951	41.952	33.2274
																					32.1873	37.1516	37.7138
																					33.8081	38.9157	38.6923
																					32.7589	34.1923	38.2243
																					34.4004	31.2377	37.1306
																					32.1671	34.254	31.0844
																					37.1889	33.5728	36.8438
																					37.0039	38.59	34.9982
																					37.8132	42.3628	42.572
																					32.8973	41.6587	35.6252
																					33.1972	40.4597	36.135
																					35.7159	39.7436	39.5755
																					35.546	40.0486	38.1267
																					35.6085	39.6459	36.8487
																					35.0152	38.5711	37.1507
																					37.0562	43.446	40.0509
																					35.7279	41.1019	39.7007
																					36.6565	36.9293	39.6714
																					40.02	38.2882	37.7092
																					31.7852	42.048	39.4368
																					34.0461	38.9345	39.2237
																					35.6583	34.5498	38.693
																					36.102	36.1658	33.6865
																					37.5173	38.0025	38.9365
																					33.1777	35.8313	38.2691
																					38.0714	37.1891	37.9726
																					38.2027	41.7111	37.8517
																					39.4738	42.0685	37.291
																					38.0732	41.0821	35.9227
																					41.1828	44.1739	38.4172
																					37.3476	43.5521	38.444
																					43.0388	41.1963	38.1366
																					40.0385	42.8143	39.6707
																					40.1253	40.7151	34.5204
																					40.2358	37.5161	36.4802
																					38.5072	42.4522	34.9544
																					38.6106	44.0442	35.2324
																					42.3141	41.0784	38.4044
																					39.0903	38.1103	34.0982
																					37.7124	41.1848	35.1264
																					42.1749	43.9028	38.3882
																					40.1353	43.9061	35.0142
																					38.6303	43.4142	35.2202
																					40.0625	40.2144	36.8378
																					41.1056	40.0057	37.133
																					38.5798	38.8376	36.1375
																					35.7147	37.1411	36.5098
																					38.8334	41.8354	35.337
																					37.7356	42.8141	36.6999
																					37.4769	41.4652	35.8256
																					39.7284	40.3809	37.2121
																					34.6258	38.018	38.3539
																					40.254	38.2472	40.8797
																					35.992	41.0514	36.3568
																					35.7117	40.3043	38.6206
																					33.1299	28.6945	38.1614
																					37.3469	29.2512	36.3572
																					35.2412	37.7521	36.9079
																					36.6534	37.638	36
																					37.546	39.0147	32.5964
																					35.5604	31.0858	36.5375
																					40.3399	36.0459	37.5629
																					41.4513	39.7864	37.985
																					32.2379	36.8558	36.5786
																					38.2624	36.1685	36.0085
																					37.0502	39.704	37.975
																					39.1425	36.7515	37.0231
																					41.624	36.075	39.0128
																					37.9205	38.9849	36.03
																					38.1566	39.0392	36.0378
																					39.8457	36.772	32.0643
																					37.2878	36.78	35.0234
																					38.4361	39.72	40.0675
																					36.4966	39.7705	37.0119
																					38.1279	30.138	38.5215
																					37.4824	38.33	36.539
																					35.0921	39.0487	37.0629
																					38.0181	31.6011	33.1234
																					37.5332	34.558	35
																					38.1484	39.0838	36.52
																					41.3746	33.8129	38.0326
																					38.0496	43.5884	39.0026
																					37.4718	35.34	40.04
																					33.9257	36.1938	32.0472
																					36.3818	38.3049	36.1115
																					35.3879	34.128	36.1339
																					40.1608	36.8466	33.1533
																					40.7971	36.7961	33.2361
																					37.292	36.2407	33.0418
																					42.1526	33.7667	35.0218
																					38.7903	35.2379	37.0726
																					36.681	45.0095	35.4651
																					36.5284	37.5584	37.515
																					42.2704	42.8074	37.5382
																					39.5545	36.8955	36.2122
																					36.0272	40.5044	37.5
																					37.9268	40.5227	34.6651
																					36.6232	39.0136	40.5668
																					38.9086	36.9052	38.6728
																					36.7295	36.0251	38.505
																					37.2166	39.0951	38.0321
																					39.4299	34.6992	35.6078
																					37.0475	31.9728	36.5173
																					37.0251	32.0007	38.5987
																					39.3009	36.0374	38.0232
																					39.1218	30.4624	37.0138
																					40.0986	35.2827	37.206
																					40.3125	30.4032	34.1198
																					42.306	38.3602	38.5113
																					44.9295	36.8289	37.5085
																					37.8768	33.6401	32.6098
																					44.6539	35.2165	32.6423
																					41.4923	32.819	39.6593
																					41.2681	29.5841	35.0671
																					39.7688	32.793	38.0144
																					39.7001	31.984	35.1002
																					34.2415	31.234	34.2975
																					34.0327	31.232	37.0532
																					37.8957	30.4217	36.528
																					40.8099	27.336	39.0031
																					41.4437	33.6511	34.514
																					35.5234	35.192	35.5086
																					35.1042	31.1771	36.1083
																					39.4767	31.2366	34.5876
																					33.7276	32.1995	38.01
																					41.5882	28.9776	35.0288
																					36.3469	32.9231	37.495
																					35.0371	34.5383	38.0119
																					37.0324	32.1132	38.1306
																					35.9853	36.914	35.4951
																					37.99	40.4664	35.3055
																					39.0133	32.8707	39.4665
																					32.0718	39.5125	38.6868
																					34.5485	30.68	39.6616
																					34.4924	29.7875	38.2377
																					36.5728	35.2424	35.4877
																					36.557	35.382	37.0573
																					36.5929	25.6919	33.0752
																					31.6262	30.0287	38.4781
																					33.5661	34.2161	37.4731
																					35.0483	31.112	41.98
																					36.5193	26.6702	37.993
																					36.6653	31.062	34.4831
																					36.055	29.8862	35.515
																					36.0599	30.4387	38.5788
																					34.1511	25.6753	35.0571
																					33.5571	35.9182	37.6236
																					37.5718	29.8639	35.0391
																					36.6523	25.7278	35.5038
																					35.5936	35.6613	39.4736
																					35.0061	32.9423	35.0437
																					40.0322	26.5552	39.2135
																					37.5762	30.9964	39.5804
																					36.5973	31.8636	35.571
																					39.5182	31.9336	37.1143
																					35.0823	35.3063	36.086
																					35.5853	33.2134	39.5306
																					31.3369	29.9581	37.9834
																					30.7448	35.2819	35.1771
																					35.7197	32.6125	35.5744
																					35.1795	32.6968	41.6586
																					33.5779	32.9138	37.1554
																					29.4951	29.4435	40.3572
																					37.912	34.1663	37.2031
																					38.0604	34.1238	36.1281
																					37.0985	31.0722	39.2473
																					38.3687	35.1662	39.9827
																					37.2406	35.5453	39.5216
																					36.1527	36.2445	37.1214
																					35.5329	34.9391	38.2288
																					37.177	32.1294	40.1074
																					34.2119	31.5325	37.1115
																					36.3199	33.2039	36.9932
																					30.1417	31.3625	38.1243
																					36.628	32.2978	38.2021
																					33.7175	33.1692	41.1867
																					37.1913	34.9949	36.712
																					35.6013	36.0243	39.1833
																					41.0868	31.6022	37.1222
																					41.0332	31.5562	31.4953
																					40.0466	34.6503	40.6106
																					46.1236	33.0984	39.2351
																					36.4984	32.0231	37.6182
																					40.5426	35.1716	38.97
																					39.6831	34.6394	39.9672
																					37.009	37.3692	38.211
																					36.3505	31.2609	38.1653
																					36.7119	31.6839	34.1025
																					37.0132	34.3912	38.5711
																					34.5178	29.2497	41.041
																					40.5472	30.6548	39.1576
																					34.9924	37.9789	39.8803
																					36.5647	36.2116	38.4016
																					39.0228	34.1667	36.5286
																					40.019	31.0107	37.985
																					36.6691	33.8083	36.1539
																					42.002	31.6664	35.2244
[truncated: 488 more rows]
